# Supplementary material for: Magmatic processes within the plumbing system of the ultraslow-spreading southwest Indian ridge: constraints from olivine, plagioclase and melt inclusions
Source: Springer Nature journal article supplement (doi:10.1007/s00410-024-02098-0), 2024-02-22

Supporting Information for

**Magmatic processes within the plumbing system of the ultraslow-spreading southwest Indian ridge: constraints from olivine, plagioclase and melt inclusions**

**Quan Ou1, 2, 3*, Sheng-Ping Qian4*, Kaj Hoernle5, 6, Bruna B. Carvalho7, Feng Zi8, Kun Wang9, Le Zhang10, Jing-Yi Liu3, Jia Liao1**

1Sankuang Research Group, Changsha General Survey of Natural Resources Center, China Geological Survey, Changsha, 410600, China

2State Key Laboratory of Continental Dynamics, Northwest University, Xi’an, 710069, China

3State Key Laboratory of Oil and Gas Reservoir Geology and Exploitation, Institute of Sedimentary Geology, Chengdu University of Technology, Chengdu, 610059, China

4State Key Laboratory of Marine Geology, Tongji University, Shanghai, 200092, China

5GEOMAR Helmholtz Centre for Ocean Research Kiel, Wischhofstrasse 1-3, 24148 Kiel, Germany

6Institute of Geosciences, Kiel University, Ludwig-Meyn-Strasse 10, 24118 Kiel, Germany

7Dipartimento di Geoscienze, Università degli studi di Padova, Via G. Gradenigo 6, 35131 Padova, Italy

8School of Earth Sciences and Spatial Information Engineering, Hunan University of Science and Technology, Xiangtan, 411201, China

9School of Resources and Geosciences, China University of Mining and Technology, Xuzhou, 221116, China

10State Key Laboratory of Isotope Geochemistry, Guangzhou Institute of Geochemistry, Chinese Academy of Sciences, Guangzhou 510640, China

Corresponding authors:

Quan Ou (ouquanCSU@126.com), https://orcid.org/0000-0002-4444-8080;

Sheng-Ping Qian (shengpingqian@tongji.edu.cn), https://orcid.org/0000-0003-1750-6027

**Contents of this file**

Tables S1 to S13

Supplementary document 1 to 3

**Introduction**

The data set contained in the additional supporting information (Tables S1 to S13, three Supplementary document and Figure S1), include whole-rock/basaltic matrix glass data (Table S1), mineral composition (major and Sr isotopic) data (Table S2-3), Olivine-hosted (Table S4, including post-entrapment crystallization of olivine) and plagioclase-hosted (Table S5) melt inclusion data, the results of modelling crystallization through the Petrolog 3 software (Table S6, including post-entrapment crystallization of plagiolcase), calculated results of physical-chemical factors (Table S7-13), analytical procedure (Supplementary document 1), detailed procedure of correcting PEP in plagioclase-hosted melt inclusion (both in Table S6 and Supplementary document 2), detailed method descriptions about the physico-chemical factors (Supplementary document 3) and the photomicrographs to the studied PUBs with the proportions of phenocrysts using ImageJ software (Figure S1) of MORBs from SWIR (this and previous studies).

**Captions for Tables S1 to S14**

**Table S1**. Locations and major (wt.%), trace element (10-6), Sr-Nd-Pb isotopic compositions of MORBs from SWIR (this study and literature)

**Table S2**. Major element compositions of olivine crystals of MORBS from SWIR

**Table S3**. Major element and Sr isotope compositions of plagioclase crystals of MORBS from SWIR

**Table S4**. Major element and Pb isotope compositions (in wt.%) of olivine melt inclusions of MORBs from SWIR

**Table S5**. Major-trace element and Pb-Sr isotope compositions (in wt.%) of plagioclase melt inclusions of MORBs from SWIR

**Table S6**. The results of modelling crystallization through the Petrolog 3 software

**Table S7**. Calculated results of the crystallization pressures for basaltic glasses and its mineral hosted melt inclusions of the studied PUBs and MORB data of whole SWIR from database of EarthChem

**Table S8**. Results of the EPMA analyses and Al-in-olivine thermometry for the olivine-spinel pairs analysed in this study, normal MORB data and large igneous provinces OIB data from Coogan et al. (2014)

**Table S9**. Results of the glass (or liquid) thermometer for basaltic glasses and its mineral hosted melt inclusions of the studied PUBs

**Table S10**. Results of the olivine-liquid thermometer for basaltic glasses and its mineral hosted melt inclusions of the studied PUBs.

**Table S11**. Results of the plagioclase-liquid thermometers for basaltic glasses and its mineral hosted melt inclusions of the studied PUBs

**Table S12**. Results of the calcium-in-olivine geohygrometer for basaltic glasses and its mineral hosted melt inclusions of the studied PUBs

**Table S13**. Results of the liquid and its related minerals (i.e. plagioclase and olivine) density for during crystallization of the representative primary magma to the studied PUBs and results of the melt density to the studied PUBs

**Caption for Supplementary Document**

Supplementary document 1: analytical methods

document 2: detailed procedure of correcting PEC in plagioclase-hosted melt inclusion

document 3: detailed method descriptions about the physico-chemical factors

Supplementary document 1: analytical methods

Basaltic glass analytical procedure

Basaltic glass (collected from the basalts) major elements were determined on fused glass disks using a Rigaku ZSX-100e X-ray fluorescence spectrometer (XRF) according to the analytical methods reported by Goto and Tatsumi (1996). Analytical precision was better than 5% for the majority of major elements, except for the elements (e.g., manganese, phosphorus) with low content in basalts. Trace element analyses were carried out using a Perkin-Elmer ELAN 6000 inductively coupled plasma mass spectrometer (ICP-MS), following the methods reported by Li et al. (2006). About 50 mg of each powdered sample was dissolved in a high-pressure Teflon bomb for 24 h using a HF+HNO3 mixture. Rh was used as an internal standard to monitor signal drift during counting. The USGS (United States Geological Survey) and Chinese National standards BCR-1, BHVO-1, W-2 and GSR-3 were chosen for calibrating element concentrations of measured samples. Analytical uncertainty for most trace elements was better than 5% based on repeated analyses of USGS standards BHVO-2, AGV-1 and AGV-2, which were analyzed as unknowns for data quality control. Replicate analyses of the standard rocks are in good agreement with the reference values. The Sr–Nd–Pb isotopic ratios of whole-rock were measured with a Neptune multicollector-ICPMS. Nd and Sr isotopic ratios were normalized for within-run fractionation to 146Nd/144Nd = 0.7219 (Vance and Thirlwall 2002) and 86Sr/88Sr = 0.1194 (Elburg et al. 2005), respectively. Standards NBS987 and standard JNdi-1 were used to check 87Sr/86Sr and 143Nd/144Nd measurements, respectively. The 87Sr/86Sr measured in NBS987 was 0.710236 ± 0.000016 (2, n=13) compared to a published value of 0.710244 ± 0.000014 (Chu et al. 2009). The 143Nd/144Nd measured in JNdi-1 was 0.512114 ± 0.000010 (2, n=13) compared to a published value of 0.512112 ± 0.000010 (Elburg et al. 2005). Repeated measurements of NBS 981 during the course of the analyses yielded 206Pb/204Pb, 207Pb/204Pb, and 208Pb/204Pb of 16.929 ± 0.0008 (2, n=13), 15.481 ± 0.0008 (2, n=13), and 36.669 ± 0.0020 (2, n=13), respectively, in agreement with the values reported by (Todt et al. 1996) (206Pb/204Pb = 16.935 ± 0.0007, 207Pb/204Pb = 15.489 ± 0.0009, and 208Pb/204Pb = 36.701 ± 0.0034), respectively.

Minerals and host glasses (melt inclusions) analytical procedure

Initial back-scattered electron images of plagioclase and olivine grains from 3 polished blocks and 1 epoxy resin disk were collected before quantitative microanalyses. Major elements of minerals and host glasses (from the thin section) were determined using a JEOL JXA-8100 electron probe micro-analysis (EMPA). The volatile elements (Na, K) were analyzed first to minimize their losses. The operating conditions for olivine were a 20 kV accelerating voltage and a 100 nA beam current; and a 15 kV accelerating voltage and a 20 nA beam current for other minerals, melt inclusions and matrix glasses. A variable peak counting time of 10-120 s was designed for the intensity of the characteristic X-ray lines and desired precision. A range of metal, oxide and silicate (e.g., jadeite, wollastonite) standards (e.g., jadeite for Na, periclase for Mg, wollastonite for Ca, Si, rutile for Ti, fayalite for Fe, K-feldspar for K, corundum for Al, apatite for P, manganotantalite (Mn) and pure metals for Cr, and Ni) were used to calibrate the spectrometers and for matrix reduction of the data. To monitor machine drift, an internal olivine standard (from Hannuoba mantle peridotite) and an internal glass standard (JB-2, Ren et al. 2004, 2005) were analyzed before and after each batch analysis. To the major elements of the olivine, the spot size of 2 μm. The internal olivine standard was analyzed after every 5 measurements to monitor potential instrumental drift and to estimate accuracy and precision. The analytical uncertainty is better than 2% for SiO2, FeO, MgO and MnO, 4% for NiO and 7% for CaO. To the major elements of the melt inclusions, the spot diameter is 3μm. To monitor instrumental drift, repeated measurements on the internal glass standard (JB-2) demonstrated that the analytical uncertainty is better than 0.5% for most major elements (except 6% for MnO and 8% for P2O5). Considering the accuracy of testing results of monitoring standard, the sample results of volatile elements are robust and not very different from true values.

In order to determine the chemical composition of melt inclusions, it is almost always preferable to analyze a homogeneous glass rather than a complex one with mixture of various crystalline phases and residual glass. Therefore, slowly cooled melt inclusions containing mixtures of crystals and glass require reheating and quenching prior to analysis (Ren et al. 2005). To homogenize olivine- and plagioclase-hosted melt inclusions, a 1 atm gas-mixing furnace was used to heat olivine and plagioclase separates to 1,250 °C at the quartz–fayalite–magnetite (QFM) buffer. Olivine and plagioclase grains were rapidly lifted to the top of the furnace and quenched after being heated for 10 min. A more detailed procedure of this process has been described by Ren et al. (2005) and Zhang et al. (2021). In this study, both crystal separates and rock fragments (mounted in 2 cm epoxy rounds without heated) were used to analysis the composition of melt inclusions.

In situ Sr isotope analysis was performed on plagioclases and host glasses larger than 80 μm following the procedure of Zhang et al. (2018). All in–situ Sr isotope analyses in this study were performed on a Neptune Plus MC–ICP–MS (Thermo Scientific), coupled with a RESOlution M–50 193 nm laser ablation system (Resonetics). An X skimmer cone in the interface was used to improve the instrumental sensitivity. All isotope signals are detected with Faraday cups under static mode. The laser parameters were set as follow: beam diameter, 82 μm; repetition rate, 7 Hz; energy density, ~4 J×cm–2. Helium was chosen as the carrier gas (800 ml×min–1). Each analysis consisted of 250 cycles with an integration time of 0.262 s per cycle. The first 30 s was used to detect the gas blank with the laser beam off, followed by 30 s laser ablation for sample signals collection with laser beam on. During the measurement of this study, the gas blank of 83Kr and 88Sr were less than 2.5 mv and 0.5 mv. The interferences of 84Kr and 86Kr on 84Sr and 86Sr were corrected by subtracting gas blank from the raw time–resolved signal intensities. 85Rb was used to correct the interference of 87Rb on 87Sr with a natural 85Rb/87Rb= 2.593 (Catanzaro et al. 1969). The mass bias of 87Sr/86Sr was normalized to 86Sr/88Sr = 0.1194 with an exponential law. The detailed data reduction procedure is reported in Zhang et al. (2018). Five analyses of NKT–1G (a basaltic glass) during the course of this study yielded a weighted mean of 0.70351 ± 0.00004 (2SD), which is consistent within error with the result reported value (0.703509 ± 0.000019) in Elburg et al. (2005). 5 analyses of an in–house plagioclase glass (PZHPL) yielded a weighted mean of 0.70436 ± 0.00005 (2SD), agrees within error with the result (0.704348 ± 0.000015) measured by solution method (Zhang et al. 2019).

In situ Pb isotope compositions of melt inclusions were determined using a Neptune plus MC-ICP-MS and RESOlution M-50 laser ablation system (with a wavelength of 193-nm, spot size of 45 μm, energy of 80 mJ, attenuate value of 25%, repetition rate of 3 Hz, and an integration time of 0.262 s). Samples were analyzed using a JET sample cone and an X skimmer cone. Before analysis, the sample surfaces were cleaned in an ultrasonic bath with dilute HNO3 (~10%) and Milli-Q water for 10–15 min, rinsed several times with distilled water and dried with a nitrogen gas gun. The international reference materials NKT-1G and BHVO-2G were selected as the intensities of their 208Pb peaks resemble those of the melt inclusions. These standards were measured in turn to evaluate the accuracy of the instrument prior to analysis (Zhang et al. 2014). Before and after every five analyses, an internal glass standard (BHVO-2G) was measured to detect instrumental drift. The average value of the internal glass standard was 2.0542 for 208Pb/206Pb, and 0.8335 for 207Pb/206Pb. Analytical uncertainties (2σ, n = 34) for the internal glass standard were better than 0.22% for 208Pb/206Pb and 0.36% for 207Pb/206Pb, while accuracies were better than 0.09% for 208Pb/206Pb, and 0.12% for 207Pb/206Pb.

**Reference**

Catanzaro EJ, Murphy TJ, Garner EL, Shields WR (1969) Absolute isotopic abundance ratio and atomic weight of terrestrial Rubidium. J. Res. Natl. Bur. Stand. A, 1969, 73: 511–516

Chu ZY, Chen FK, Yang YH, Guo JH (2009) Precise determination of Sm, Nd concentrations and Nd isotopic compositions at the nanogram level in geological samples by thermal ionization mass spectrometry. J Anal At Spectrom 24(11): 1534–1544.

Coogan LA, Saunders AD, Wilson RN (2014) Aluminum-in-olivine thermometry of primitive basalts: Evidence of an anomalously hot mantle source for large igneous provinces. Chem Geol 368: 1-10

Elburg M, Vroon P, van der Wagt B, Tchalikian A (2005) Sr and Pb isotopic composition of five USGS glasses (BHVO-2G, BIR-1G, BCR-2G, TB-1G, NKT-1G). Chem Geol 223(4): 196-207

Goto A, Tatsumi Y (1996) Quantitative analyses of rock samples by an X-ray fluorescence spectrometer (II). Rigaku J 13: 20–39

Li XH, Li ZX, Wingate MTD, Chung SL, Liu Y, Lin GC, Li WX (2006). Geochemistry of the 755 Ma Mundine Well dyke swarm, northwestern Australia: part of a Neoproterozoic mantle superplume beneath Rodinia? Precambrian Res 146: 1–15

Ren ZY, Takahashi E, Orihashi Y, Johnson KTM (2004) Petrogenesis of tholeiitic lavas from the submarine Hana Ridge, Haleakala Volcano, Hawaii. J Petrol 45: 2067–2099

Ren ZY, Ingle S, Takahashi E, Hirano N, Hirata T (2005) The chemical structure of the Hawaiian mantle plume. Nature 436: 837–840

Todt W, Cliff RA, Hanser A, Hofmann AW (1996) Evaluation of a 202Pb–205Pb double spike for high precision lead isotope analysis. In Earth processes: Reading the isotopic code, (pp. 429–437). Washington, DC: American Geophysical Union.

Vance D, Thirlwall VM (2002) An assessment of mass discrimination in MC-ICPMS using Nd isotopes. Chem Geol 168 (3-4): 227-240

Zhang L, Ren ZY, Wu YD, Li N (2018) Sr isotope measurement of basaltic glasses by LA-MC-ICP-MS based on a linear relationship between analytical bias and Rb/Sr ratios. Rapid Commun Mass Spectrom 32(2): 105-112

Zhang L, Ren ZY, Monica R, Handler MR, Wu YD, Zhang L, Qian SP, Xia XP, Yang Q, Xu YG (2019) The origins of high–Ti and low–Ti magmas in large igneous provinces, insights from melt inclusion trace elements and Sr–Pb isotopes in the Emeishan large Igneous Province. Lithos 344–345:122–133

Zhang L, Ren ZY, Nichols ARL, Zhang YH, Zhang Y, Qian SP, Liu JQ (2014) Lead isotope analysis of melt inclusions by LA–MC–ICP-MS. J Anal At Spectrom 29(8): 1393–1405

Zhang L, Qian SP, Li N, Hong LB, Zhang YQ, Ren ZY (2021) Simultaneous In Situ Determination of Pb Isotope Ratios and Trace Element Concentrations in Melt Inclusions by LASS-ICP-MS. Geochem Geophys Geosyst 22(1):e2020GC009451

Supplementary document 2: detailed procedure of correcting PEP in plagioclase-hosted melt inclusion

Post entrapment processes (PEP) of plagioclase (Pl) (mainly crystallization) along the walls of the melt inclusions will affect the inclusion composition to departure equilibrium state from the composition of Pl, by enriching the inclusion in elements incompatible in Pl, such as Mg and Fe (Nielsen et al. 2020). Similar to the MORBs, the Pl-hosted melt inclusion compositions also fall along the olivine+plagioclase cotectic, but are typically more primitive compositions than the matrix glass which will experience further evolution (Sinton et al. 1993; Danyushevsky et al. 2002; Nielsen et al. 2020; Hellevang and Pederson 2008). Therefore, it is possible to assess the degree of PEP that has occurred in the inclusions through the comparison between the melt inclusion compositions and the lavas along the olivine+plagioclase cotectic. Using the lever rule (Lange, 2013), the amount of Pl crystallization is roughly equal to the distance the analysis lies off the olivine+plagioclase cotectic (Figure in Table S6). Due to the Pl crystallization from the inclusion, in order to get the original composition of inclusion, Pl (equilibrium Pl or host Pl) must be added back to the inclusion following the general equation: Ci (wt%) = Cs×(1-x) + CPl×x, where Ci is the element content of interest prior to PEP, Cs is the measured element content, CPl is the element content in Pl, and x is the amount of post-entrapment crystallization that has occurred as estimated assuming mass balance and the simplifying assumption that there is no differential diffusive equilibration. Considering the homogenized glassy component in the melt inclusions hosted in situ on rock slices (see Figure 2b-c, 2e-f and 2h, in main text). Therefore, we need only to accommodate the effects of Pl crystallization (Figure in Table S6). In this study, we use MgO-Al2O3 systematics as the interest elements to get the value of x in the general equation (see Figure in Table S6). Then, using the x value, we can obtain the content of other interest elements.

**Reference**

Nielsen RL, Ustunisik G, Lange AE, Tepley III FJ, Kent AJR (2020) Trace Element and Isotopic Characteristics of Plagioclase Megacrysts in Plagioclase Ultraphyric Basalts (PUB). Geochem Geophys Geosyst 21(2):e2019GC008638

Sinton CW, Christie DM, Coombs VL, Nielsen RL, Fisk MR (1993) Near-primary melt inclusions in anorthite phenocrysts from the Galapagos Platfrom. Earth Planet Sci Lett 119(4):527-537

Danyushevsky LV, Sokolov S, Falloon TJ (2002) Melt Inclusions in Olivine Phenocrysts: Using Diffusive Re-equilibration to Determine the Cooling History of a Crystal, with Implications for the Origin of Olivine-phyric Volcanic Rocks. J Petrol 43(9):1651-1671

Hellevang B, Pedersen RB (2008) Magma Ascent and Crustal Accretion at Ultraslow-Spreading Ridges: Constraints from Plagioclase Ultraphyric Basalts from the Arctic Mid-Ocean Ridge. J Petrol 49(2):267-294

Lange AE (2013) Magmatic processes beneath mid-ocean ridges: Insights from mineral and glass chemistry in plagioclase ultraphyric basalts. Oregon State University, PhD thesis 1 1-270. https://ir.library.oregonstate.edu/concern/graduate_thesis_or_dissertations/h415pd01s

Supplementary document 3: detailed method descriptions about the physico-chemical factors

*Crystallization pressure*

Here we use major elements of basaltic matrix glasses and melt inclusions to calculate the pressures of partial crystallization of the magma related to the studied PUBs. The major element pressure (MEP) is calculated using the barometer of Herzberg (2004), which parameterizes the olivine-clinopyroxene-plagioclase saturation surface from anhydrous experiments on basalt onto the anorthite-diopside-enstatite ternary diagram. A prerequisite for the barometer method is that magmas are co-saturated with olivine, clinopyroxene, and plagioclase. In order to filter the dataset to include only melts that are olivine-clinopyroxene-plagioclase saturated, we follow the approach of Herzberg (2004). Melt compositions saturated with olivine-clinopyroxene-plagioclase are identified by lack of excess CaO (CaOexcess (wt.%) = CaO (wt.%) + 0.3MgO (wt.%)-14.5≤0).

For any basaltic glass (including mineral hosted melt inclusions) composition with no excess CaO, the pressures of partial crystallization can be estimated with the equation provided by Herzberg (2004):


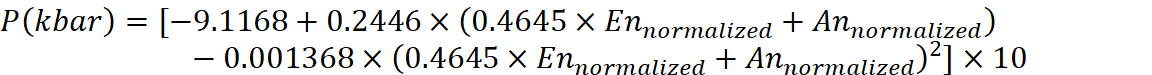


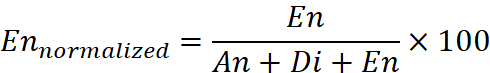


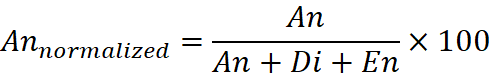


An= Al2O3+Cr2O3+TiO2; Di= CaO+Na2O+3K2O-Al2O3-Cr2O3; En= SiO2-0.5Al2O3-0.5Cr2O3-0.5FeO-0.5MnO-0.5MgO-1.5CaO-3Na2O-3K2O-0.5NiO. All weight percent compositions are converted to molar percent.

*Crystallization temperature*

(1) Al-in-olivine thermometer (TAO): the Al-in-olivine thermometer, presented by Wan et al. (2008) and Coogan et al. (2014), is independent of crystallization pressure, oxygen fugacity, melt composition, and source lithology. The compositions of studied spinels (Cr#= 0.39-0.49, Fe3+/Fetotal=0.26-0.29, Al + Cr=1.80-1.85, Ti=0.01-0.02, per four oxygens) are within the calibration ranges of the thermometer for spinel in terms of the Cr# (0-0.69), Fe3+/Fetotal (≤ 0.35), Al + Cr (≥1.4) values and Ti (< 0.025) concentrations (Coogan et al. 2014; Jennings et al. 2019). Concerning olivine composition, the high CaO (0.29-0.31 wt.%) and low P2O5 (close to zero) contents are within the calibration range of the thermometer (CaO≥ 0.2 wt.% and P2O5≤ 0.046 wt.% or P (phosphorus)≤ 200ppm) (Coogan et al. 2014; Thompson and Gibson 2000), ruling out a mantle or pre-existing cumulate xenocryst origin and the effect of Al-P charge balance substitution in the olivine. The Al-in-olivine thermometer of the olivine–spinel pairs is expressed as:


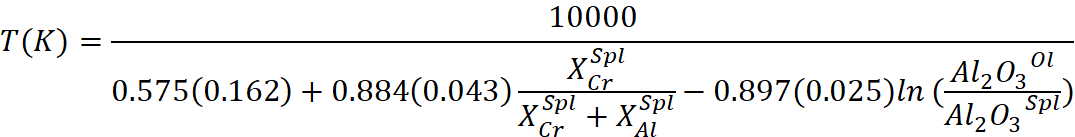


where
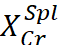
 and
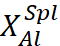
are the values of atomic Cr and Al of spinel (per four oxygens),
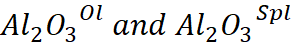
are the Al2O3 contents of olivine and spinel (in wt.%), respectively. The values in parentheses are the published standard errors of the parameter from Coogan et al. (2014).

(2) Glass (or liquid) thermometer (Tliq): we used the melt thermometer, presented by Yang et al. (1996) and applied to liquids in equilibrium with olivine + plagioclase + clinopyroxene, to calculate the liquidus temperature of the studied glasses. The input data includes the major element composition of basaltic glass and its mineral host melt inclusions. The temperature of equilibration was computed with the equation of Yang et al. (1996) and Putirka (2008) (equation 16):


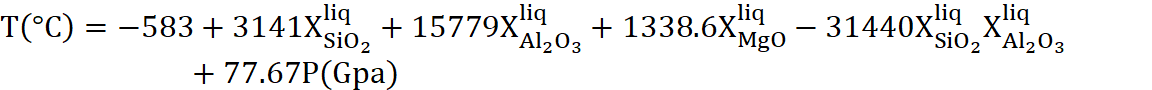


where
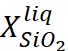
,
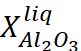
and
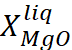
are the molar fractions of SiO2, Al2O3 and MgO in the liquid.

Considering the minor effects of pressure on the geothermometers used here and the consistency of results with other methods, the input parameters were defined using MEPs (Table S9).

(3) Olivine-liquid thermometer (TOLiq): the olivine-liquid thermometer, based on the formulation of olivine-liquid equilibrium by Putirka (2008) (equation 22), is expressed as:


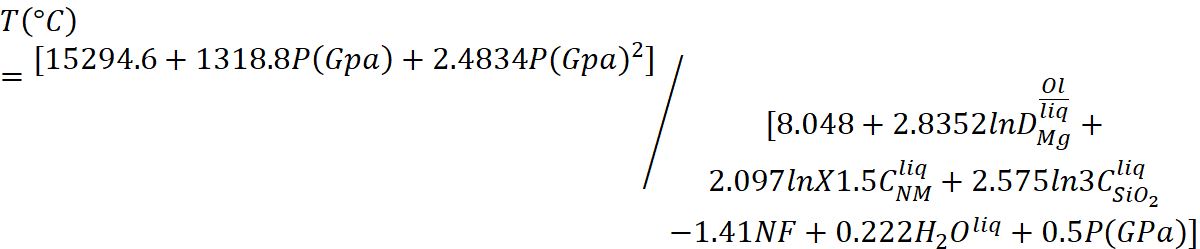


Where H2Oliq is in wt.%, and
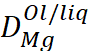
is a cation fraction ratio (
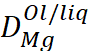
=
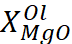
/
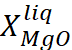
).
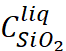
=
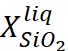
(cation fraction ratio of SiO2 in liquid),
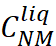
=
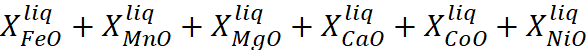
(cation fraction ratio of FeO, MnO, MgO, CaO, CoO and NiO in liquid, respectively), NF=3.5ln(1-
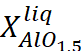
)+7ln(1-
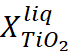
) (
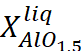
 and
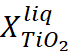
, cation fraction ratio of AlO1.5, TiO2 in liquid, respectively).

We used the measured compostions of olivine and bulk rock (basaltic matrix glasses) and melt inclusions from Mountain Jourdanne area after excluding the disequilibrium pairs (accounting for 13%) with KD(Fe-Mg)Ol-liq below 0.26 (Table S10). An essential requirement for accurate determination of olivine-melt temperatures was the attainment of equilibrium between the minerals and their host whole rocks (melts). The input conditions were also set based on the results of MEP determinations (Tables S10).

(4) Plagioclase-liquid thermometers (TPLiq): plagioclase compositions are a useful indicator of crystallization temperature and its related thermometry has since received much attention (Kudo and Weill, 1970; Putirka, 2008). In this study, a plagioclase–melt thermometry method proposed by Putrika (2008, equation 24a) was used to estimate the crystallization temperature of the plagioclase. Equation 24a is expressed as:


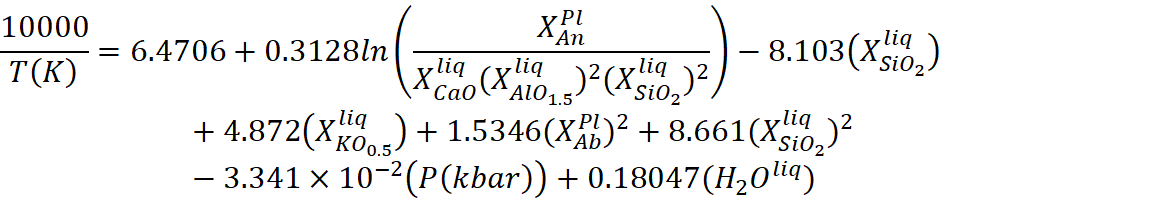


Where
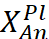
=
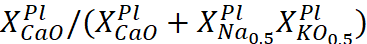
,
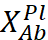
=
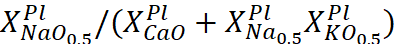
, liq= liquid and Pl=plagioclase; Mineral and liquid components (all
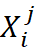
, j=mineral or liquid, and i=element) are calculated as cation fractions, except
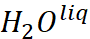
is in wt.%. In there, the plagioclase–liquid equilibrium was inferred from the Ab-An exchange (KD(An-Ab)Pl-liq=
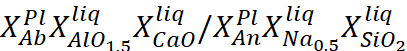
), which is nearly invariant with respect to T-P-H2O (Putirka, 2008). The values of KD(An-Ab)Pl-liq are normally distributed (0.27±0.11 for T ≥ 1050 °C).

We have used the measured compostions of plagioclases and their melt inclusions from segments 27-28 and Mountain Jourdanne area but do not consider disequilibrium pairs. It is necessary that equilibrium between the minerals and their host whole rocks to be achieved to ensure the validity of the temperature estimates (excluding 23% disequilibrium pairs). Before applying the geothermometry method, the input conditions of pressures were also set based on the results of MEPs (Table S11).

Calcium-in-olivine geohygrometer

The calcium-in-olivine geohygrometer provided by Gavrilenko et al. (2016) can be utilized to predict magmatic water contents, based on the partitioning of CaO between olivine and melt (or liquid) (i.e., DCaOOl/L) (Hesse and Grove 2003; Feig et al. 2006). The equation is expressed as:


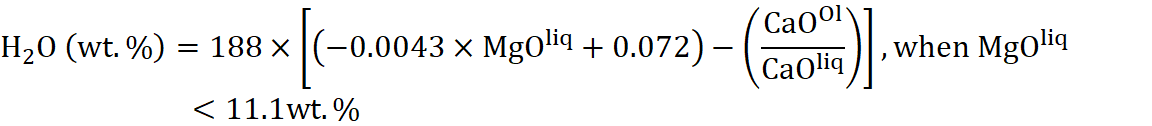


Or


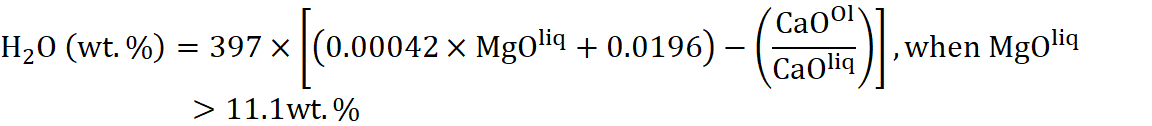


where MgOliq and CaOliq are the MgO and CaO composition (in wt.%) of liquid, respectively. Moreover, CaOOl is the composition (in wt.%) of the olivine in the samples.

To predict the magmatic water contents, we should use the composition of olivine and the melt from which they grew. We can estimate the composition of the melts (Fig. 3 and Table 13), but we do not know the composition of the olivines which were in equilibrium with them. Because it is difficult to match the relevant data one by one, especially to the data from literatures. Therefore, we assume that both the whole-rock (including matrix glasses) and the mineral melt inclusions compositions are similar to the melt composition, and then calculate the equilibrium olivine composition based on PRIMELT3 software (Herzberg and Asimow, 2015). The equilibrium olivine composition is predicted to be in equilibrium with the composition of olivine-hosted melt in Mountain Jourdanne area having an Mg number of 0.86 (Colum BD /Line 59-77, in Table S12), in excellent concordance with our measured olivine grains that have a similar Mg number ranging 0.85-0.87 (Colum X /Line 4-33, in Table S2). This measured olivine grains also have CaO concentrations ranging 0.25-0.36 wt.% (average at 0.31 wt.%; Colum Q /Line 4-33, in Table S2), similar to the estimated olivines (CaO=0.37-0.42 wt.%, average at 0.40 wt.%; Colum AT /Line 59-77, in Table S12). It, therefore, indicates that this assumption we used is valid. Then, we constrain DCaOOl/liq using the CaO contents of the calculated olivine, and whole-rock and the mineral melt inclusions compositions. Finally, water contents can be obtained by the equations provided by Gavrilenko et al. (2016). Detailed results are listed in supplementary Table S12.

*Density*

We have also calculated the density variation of the liquid and its related minerals (i.e., plagioclase and olivine), as well as melt compositions and temperature during crystallization. The liquid densities were calculated using the Petrolog3 (version 3.1.1.3) software (Danyushevsky and Plechov 2011) based on the models from Bottinga and Weill (1970), and Lange and Carmichael (1987). The corresponding plagioclases densities were calculated by extrapolating from the measured endmember densities of anorthite and albite at 25°C and 1 atm (2.76 and 2.61 gcm-3, respectively) (Robie et al. 1966), assuming that plagioclase density varies linearly between the end-members (Lange et al., 2013). Due to the limited effects of pressure on the density of minerals (Niu and Batiza 1991), the plagioclase densities are only adjusted to account for thermal expansion using the Berman model and anorthite-dependent thermal expansion expressions (Tribaudino et al. 2010):


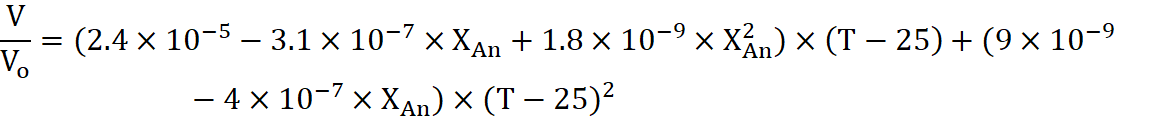


The equation for determining plagioclase density is expressed as:


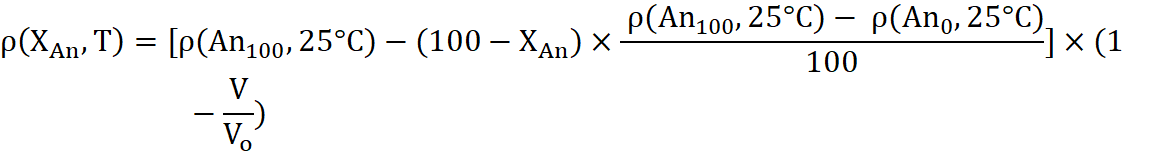


XAn is the anorthite component of plagioclase, ranging from 0-100. The value of ρ(An100, 25°C) and ρ(An0, 25°C) is 2.76 and 2.61, respectively.

Olivine density was also calculated by extrapolating from the measured end-member densities of forsterite and fayalite at 25°C and 1 atm (3.21 and 4.39 gcm-3, respectively) (Robie et al. 1966), assuming a linear relationship between end-members (Lange et al. 2013). Then, we readjust the end-member densities for thermal expansion using the thermal expansion expressions (Lange et al. 2013):


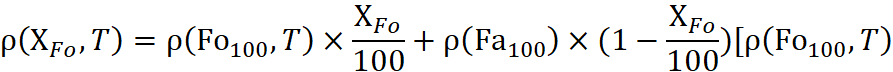


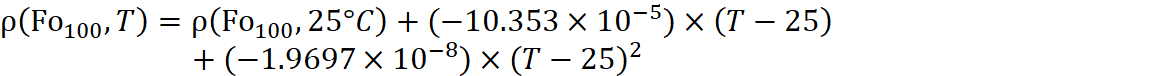


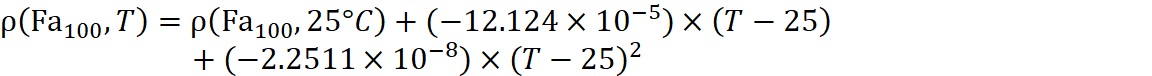


XFo is the forsterite component of olivine, ranging from 0-100. ρ(Fo100, 25°C) and ρ(Fa100, 25°C) is 3.21 gcm-3 and 4.39 gcm-3, respectively.

However, in order to plot the mineral density (which varies with temperature) on the melt density-MgO diagrams, equilibrium MgO of their melt needed to be estimated for each temperature. Thus, we selected melt compositions with the highest MgO contents (DY30II-1 in segment 28 and 30I-2-1-17 in Mountain Jourdanne area; Table S13) based on the outcomes of calculated primary magma results which were corrected by PRIMELT3 software (Herzberg and Asimow 2015) and listed in Table S12. The basis for this calculation is to adjust the evolved melt composition to equilibrate with the highest Mg number olivine (the Mg#maxOl close to ~88 for segments 27-28 areas and ~86 for the Mountain Jourdanne area; Table S2) in the studied samples (Herzberg and Asimow 2015). Then, we calculated their evolutionary paths using Petrolog3 (version 3.1.1.3) (Danyushevsky and Plechov 2011) during crystallization, choosing 1 and 4 kbar as the crystallization pressure and QFM to control the oxygen fugacity. Despite the limited effect on the density of plagioclase and olivine (Niu and Batiza 1991), pressure can cause appreciable increases in melt density (Lange et al. 2013). For this reason, we chose two representative pressures (1 and 4 kbar, based on the major element pressure results) to model the crystallization. Lastly, we use all of the calculated liquid compositions and above equations for plagioclase and olivine density to obtain the liquid density and related mineral density. The results are shown in Fig. 8d and listed in Table S13.

**Reference**

Bottinga Y, Weill D (1970) Densities of liquid silicate systems calculated from partial molar volumes of oxide components. Am J Sci 269:169-182

Coogan LA, Saunders AD, Wilson RN (2014) Aluminum-in-olivine thermometry of primitive basalts: Evidence of an anomalously hot mantle source for large igneous provinces. Chem Geol 368:1-10

Danyushevsky LV, Plechov P (2011) Petrolog3: Integrated software for modeling crystallization processes. Geochem Geophys Geosyst 12(7)

Feig ST, Koepke J, Snow JE (2006) Effect of water on tholeiitic basalt phase equilibria: an experimental study under oxidizing conditions. Contrib Mineral Petrol 152(5):611-638

Gavrilenko M, Herzberg C, Vidito C, Carr MJ, Tenner T, Ozerov A (2016) A Calcium-in-Olivine Geohygrometer and its Application to Subduction Zone Magmatism. J Petrol 57(9):1811-1832

Herzberg C (2004) Partial Crystallization of Mid-Ocean Ridge Basalts in the Crust and Mantle. J Petrol 45(12):2389-2405

Herzberg C, Asimow PD (2015) PRIMELT3 MEGA.XLSM software for primary magma calculation: Peridotite primary magma MgO contents from the liquidus to the solidus. Geochem Geophys Geosyst 16(2):563-578

Hesse M, Grove TL (2003) Absarokites from the western Mexican Volcanic Belt: constraints on mantle wedge conditions. Contrib Mineral Petrol 146(1):10-27

Jennings ES, Gibson SA, Maclennan J (2019) Hot primary melts and mantle source for the Paraná-Etendeka flood basalt province: New constraints from Al-in-olivine thermometry. Chem Geol 529:119287

Kudo AM, Weill DF (1970) An igneous plagioclase thermometer. Contrib Mineral Petrol 25(1):52-65

Lange AE, Nielsen RL, Tepley III FJ, Kent AJR (2013) The petrogenesis of plagioclase-phyric basalts at mid-ocean ridges. Geochem Geophys Geosyst 14(8):3282-3296

Lange RA, Carmichael ISE (1987) Densities of Na2O-K2O-CaO-MgO-FeO-Fe2O3-Al2O3-TiO2-SiO2 liquids: New measurements and derived partial molar properties. Geochim Cosmochim Acta 51(11):2931-2946

Niu YL, Batiza R (1991) DENSCAL: Program for calculating densities of silicate melts and mantle minerals as a function of pressure, temperature, and composition in melting range. Comput Geosci 17(5):679-687

Putirka KD (2008) 3. Thermometers and Barometers for Volcanic Systems. In: Keith DP, Frank JT, III (eds) Minerals, Inclusions And Volcanic Processes, vol Minerals, Inclusions And Volcanic Processes, http://dx.doi.org/10.1515/9781501508486-004. De Gruyter, pp 61-120

Robie RA, Bethke PM, Toulmin MS, Edwards JL (1966) Section 5: X-ray crystallographic data, densities, and molar volumes of minerals. In: Clark SP, Jr. (ed) Handbook of Physical Constants, vol 97. Geological Society of America, p 0

Thompson RN, Gibson SA (2000) Transient high temperatures in mantle plume heads inferred from magnesian olivines in Phanerozoic picrites. Nature 407(6803):502-506

Tribaudino M, Angel RJ, Cámara F, Nestola F, Pasqual D, Margiolaki I (2010) Thermal expansion of plagioclase feldspars. Contrib Mineral Petrol 160(6):899-908

Wan ZH, Coogan LA, Canil D (2008) Experimental calibration of aluminum partitioning between olivine and spinel as a geothermometer. Am Mineral 93(7):1142-1147

Yang HJ, Kinzler RJ, Grove TL (1996) Experiments and models of anhydrous, basaltic olivine-plagioclase-augite saturated melts from 0.001 to 10 kbar. Contrib Mineral Petrol 124(1):1-18

Figure S1: the photomicrographs to the studied PUBs with the proportions of phenocrysts using ImageJ software (Pl, plagioclase; Ol, olivine)


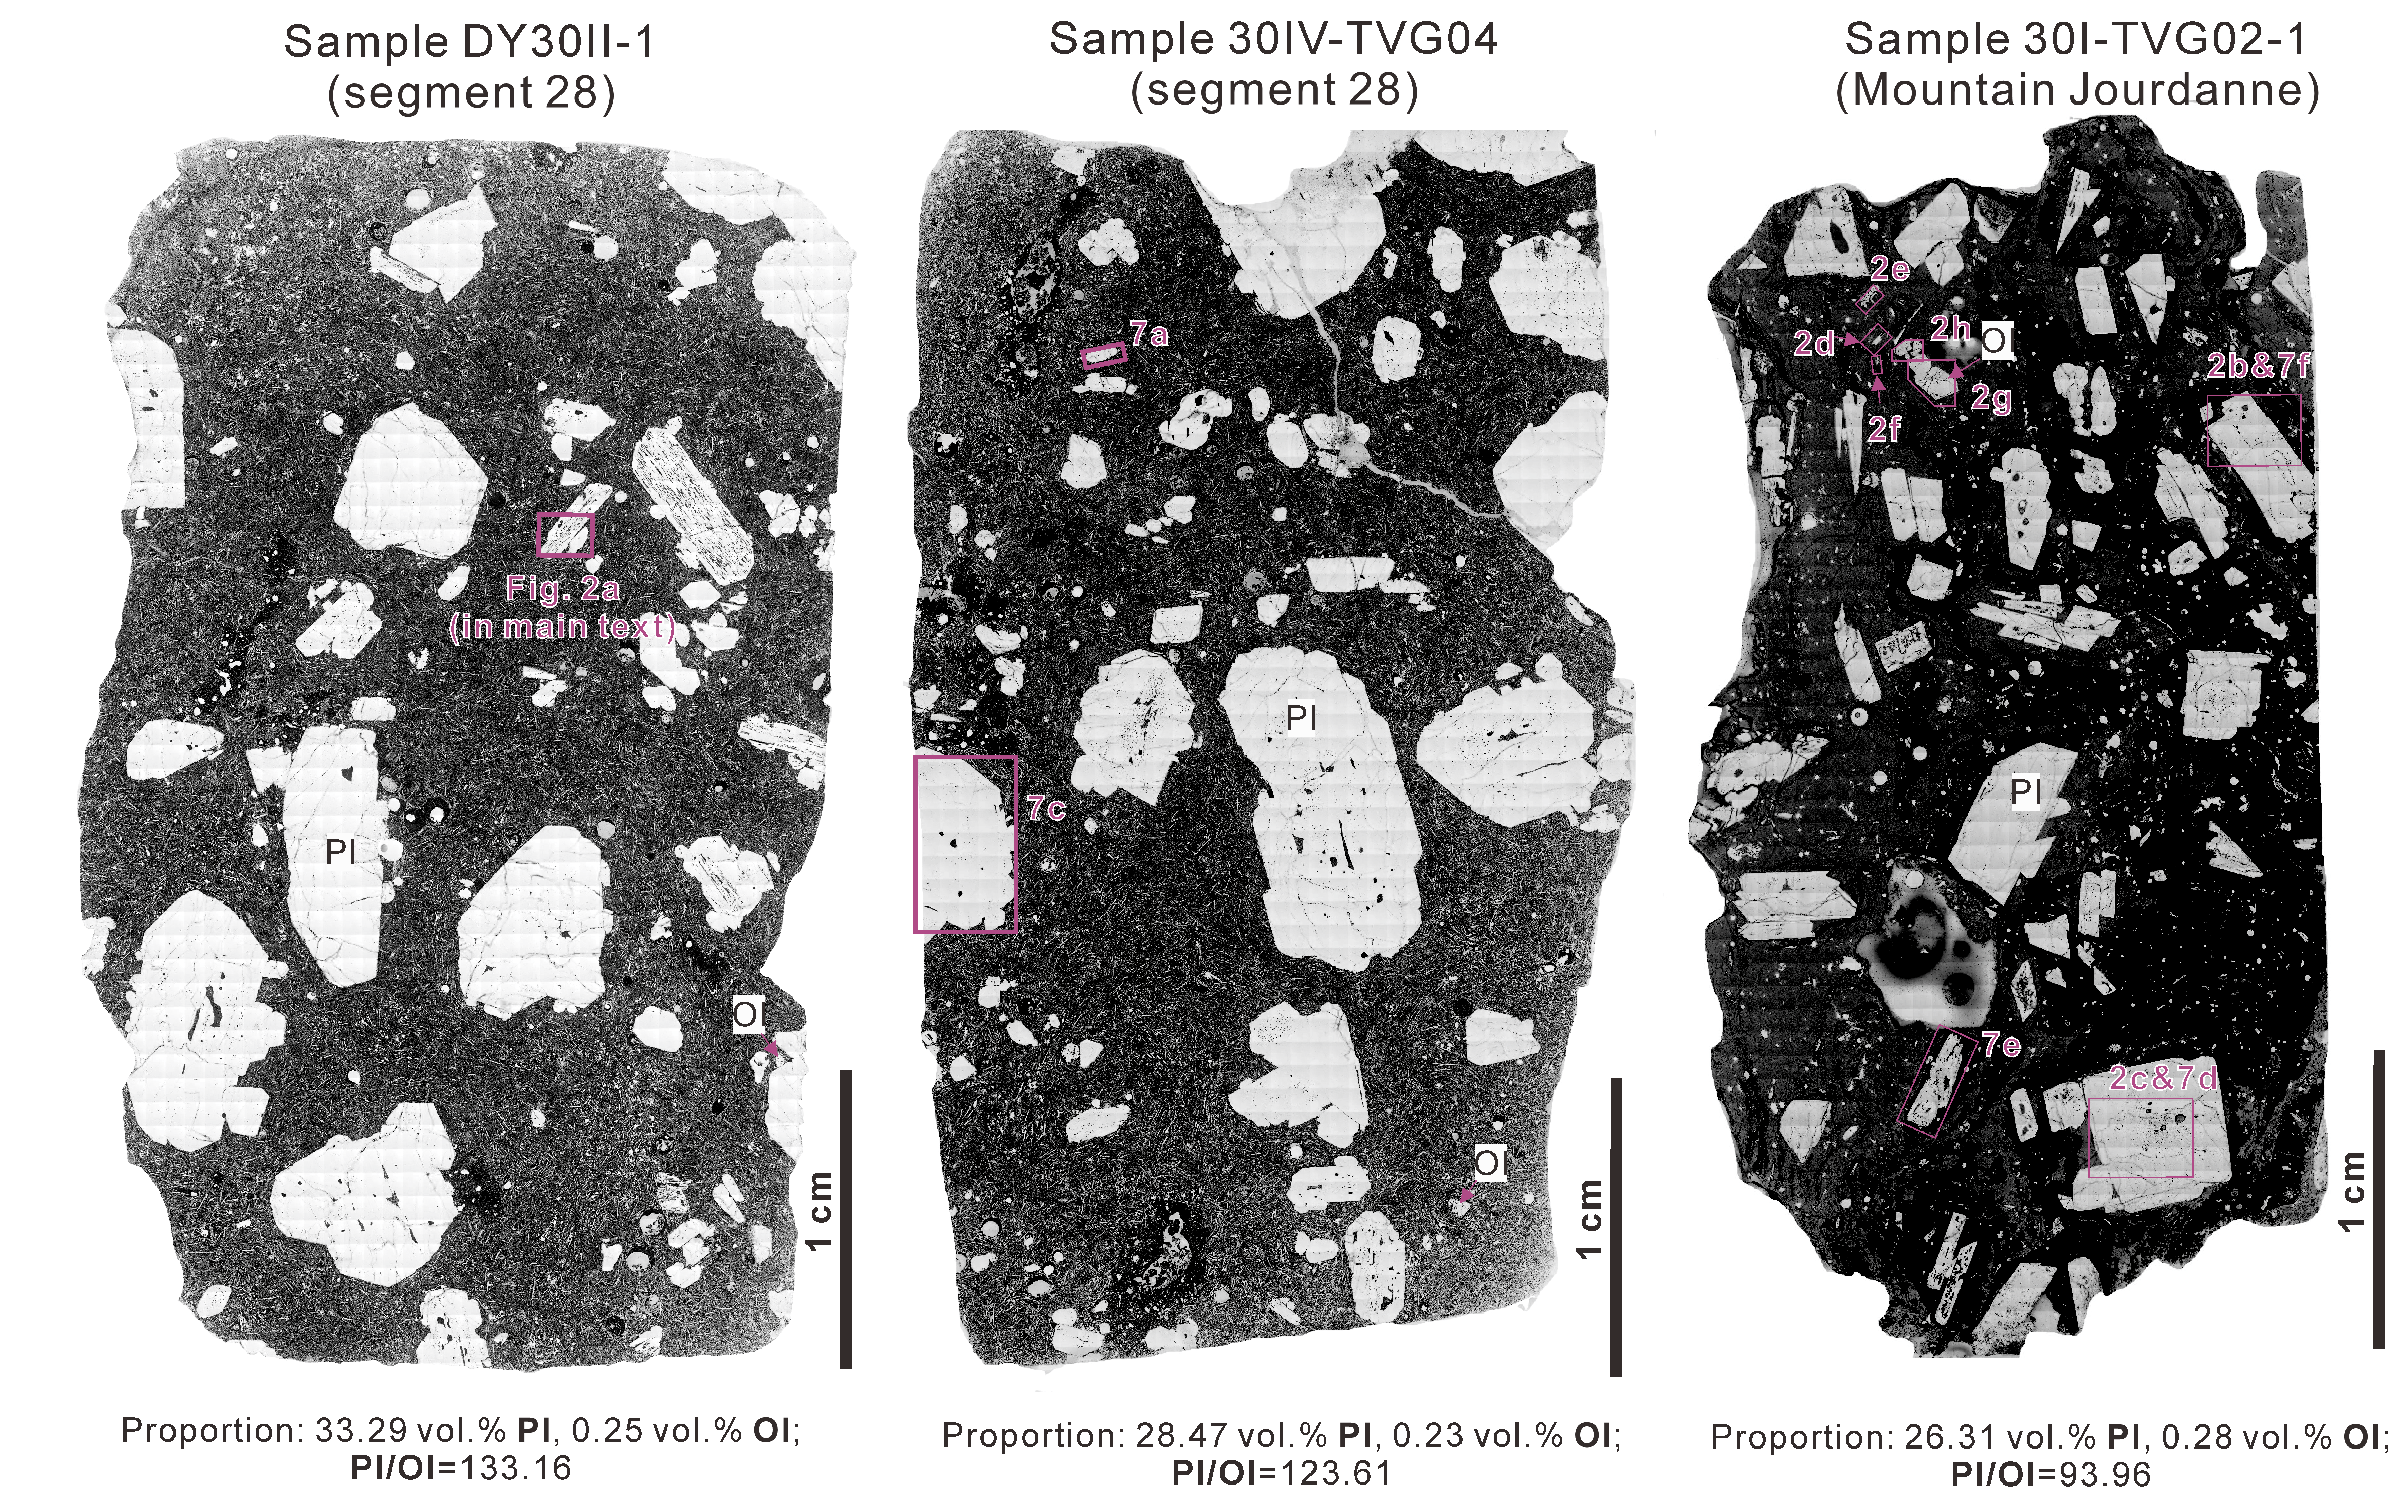

Supplement: MOESM1 [file 410_2024_2098_MOESM1_ESM.doc]
