# Supplementary material for: Magmatic processes within the plumbing system of the ultraslow-spreading southwest Indian ridge: constraints from olivine, plagioclase and melt inclusions
Source: Springer Nature journal article supplement (doi:10.1007/s00410-024-02098-0), 2024-02-22
Supplement: MOESM2 [file 410_2024_2098_MOESM2_ESM.xls]

## Sheet: Table S1
	Supplemental Table S1. Locations and major (wt.%), trace element (10-6), Sr-Nd-Pb isotopic compositions of MORBs from SWIR (this study and literature)
	Data source	longitude（°E）	latitude（°S）	Deepth (m)	Zone	Rock type/method	Sample	SiO2	Al2O3	Fe2O3t	MgO	CaO	Na2O	K2O	MnO	P2O5	TiO2	LOI	Total	Li	Be	Sc	V	Cr	Co	Ni	Cu	Zn	Ga	Rb	Sr	Y	Zr	Nb	Sn	Sb	Cs	Ba	La	Ce	Pr	Nd	Sm	Eu	Gd	Tb	Dy	Ho	Er
	This study	50.4853	37.697	1549	segment 27	basaltic glass-XRF	DY34-IV
	(a)	50.4829	37.6591	1812	Segment 27	basalt (whole rock)	SW27-1	49.8548	14.7913	11.7904	7.83361	11.5336	2.31902	0.103587	0.181533	0.108715	1.35893	-0.315516	99.8755			40.94	304.9	207.3	46.37	98.09	85.87	104.8	17.21	0.683	94.87	36.63	85.16	1.132			0.017	7.335	2.103	7.466	1.452	8.7	3.283	1.198	4.831	0.91	5.947	1.328	3.826
	(a)	50.4725	37.6605	1813	Segment 27	basalt (whole rock)	SW27-3	49.6484	14.7892	11.9585	7.83008	11.6086	2.41637	0.0962002	0.179096	0.121785	1.3028	0.108923	99.9511			41.17	315.7	210.6	47.16	95.14	75.09	107.2	17.56	1.584	102.2	34.04	83.5	1.132			0.23	6.835	1.892	6.811	1.276	7.617	2.952	1.132	4.403	0.837	5.517	1.225	3.56
	(a)	50.4703	37.6582	1739	Segment 27	basalt (whole rock)	SW27-6	50.0088	14.7731	11.641	7.6982	11.2965	2.75612	0.239513	0.179123	0.111568	1.36338	-0.107162	100.067			42.39	311.3	206.3	59.97	101.5	74.86	105	17.58	1.96	99.7	36.82	85.92	1.183			0.11	7.482	2.078	7.437	1.447	8.549	3.277	1.207	4.816	0.902	5.966	1.305	3.837
	(b)	50.47	37.66	1776	Segment 27	basalt (whole rock)	DY115-19-3-11-2	47.8	16.9	10.9	8.78	11.4	2.62	0.13	0.14		0.82		99.49					329		172	90						44.8						1.47	4.61	0.86	4.85	1.83	0.75	2.61	0.51	3.27	0.74	2.08
	(b)	50.47	37.66	1776	Segment 27	basalt (whole rock)	DY115-20-4-7	47.5	17.1	10.7	8.9	11.6	2.43	0.07	0.15	0.06	0.85		99.36					274		151	71						45.9						1.46	4.7	0.87	4.61	1.69	0.69	2.28	0.46	3.12	0.67	1.88
	(b)	50.47	37.66	1776	Segment 27	basalt (whole rock)	DY115-19-3-12	47.8	16.2	11.1	9.68	11.2	2.48	0.14	0.14		0.84		99.58					403		214	83						44.5						1.5	4.86	0.92	4.96	1.79	0.75	2.63	0.5	3.42	0.74	2.06
	(b)	50.47	37.66	1776	Segment 27	basalt (whole rock)	DY115-19-3-10	48.3	16.7	10.3	7.87	11.9	2.61	0.2	0.13	0.01	0.91		98.93					289		127	100						55.8						1.66	5.47	1.04	5.67	2.07	0.86	2.93	0.57	3.54	0.81	2.21
	(b)	50.47	37.66	1776	Segment 27	basalt (whole rock)	DY115-19-3-8-1	49.8	14.9	12	7.77	11.1	2.65	0.08	0.17	0.06	1.35		99.88					214		106	90						79.2						2.05	6.95	1.36	8.01	3.12	1.15	4.56	0.9	5.64	1.27	3.63
	(b)	50.47	37.66	1776	Segment 27	basalt (whole rock)	DY115-19-3-9	49.8	14.8	12	7.71	11.2	2.55	0.09	0.18	0.06	1.37		99.76					216		102	86						76.4						2.12	7.4	1.39	8.2	3.17	1.18	4.66	0.91	6	1.32	3.64
	(b)	50.47	37.66	1776	Segment 27	basalt (whole rock)	DY115-19-3-8-2	49.8	14.8	12	7.78	11.2	2.59	0.09	0.18	0.06	1.35		99.85					210		105	81						78.4						2.21	8.34	1.54	8.63	3.32	1.2	4.85	0.94	6	1.33	3.82
	(b)	50.47	37.68	1631	Segment 27	basalt (whole rock)	DY115-20-5-6	50.7	15.4	9.81	6.93	11.8	2.44	0.2	0.17	0.1	1.27		98.82					200		75	53						77.7						1.74	5.95	1.1	6.65	2.68	1.17	3.7	0.72	5.08	1.22	3.43
	(c)	50.4671	37.6579	1739	Segment 27	basalt (whole rock)	TVG14	46.94	14.39	12.78	9.28	11.39	2.65	0.07	0.17	0.077	1.065	0.65	98.812													17.7							1.51	4.71	0.814	4.72	1.5	0.711	2.16	0.474	3.1	0.629	1.99
	(a)	50.4642	37.6684	1676	Segment 27	basalt (whole rock)	SW27-4	49.3073	17.1668	10.3424	6.60553	12.2777	2.37849	0.212684	0.159256	0.103773	1.27405	-0.0879585	99.828			35.34	252.5	199.1	43.06	68.12	61.96	102.1	17.42	1.645	133.3	31.6	87.61	1.589			0.042	11.08	2.414	8.056	1.48	8.553	3.009	1.11	4.261	0.794	5.162	1.147	3.275
	(a)	50.4627	37.6541	1732	Segment 27	basalt (whole rock)	SW27-5	47.8897	16.147	10.4648	9.57432	11.7671	2.22175	0.256755	0.144679	0.0458491	0.799813	0.388176	99.3118			33.16	179.9	385.3	60.32	212.2	89.22	98.21	16.12	4.574	133.9	19.72	47.36	0.698			0.272	4.054	1.442	4.85	0.871	4.879	1.75	0.759	2.633	0.496	3.269	0.718	2.041
	(b)	50.46	37.65	1729	Segment 27	basalt (whole rock)	DY115-19-3-14-2	47.9	15.6	11.2	10.4	10.9	2.46	0.16	0.14		0.87		99.63					494		275	93						45.9						1.52	4.73	0.9	4.98	1.88	0.79	2.75	0.53	3.42	0.76	2.05
	(d)	50.4713	37.6804	1640	Segment 27	basalt (whole rock)	21VI-14-8	50.234	15.0369	11.0703	7.44466	11.2348	2.60102	0.164546	0.175497	0.0927342	1.39214	0.0542741	99.5008			43.83	322.8	213		89.72	82.51			1.538	104.5	29.52	83.54	1.007				7.314	1.783	6.218	1.213	7.025	2.85	1.125	4.184	0.784	5.456	1.184	3.334
	(d)	50.4678	37.6792	1719	Segment 27	basalt (whole rock)	21VI-11-7	50.2585	14.9991	10.9878	7.55622	11.2066	2.55139	0.216342	0.176004	0.0944652	1.40018	0.053376	99.4999			41.76	314.3	211.9		91.69	76.39			1.99	105.8	29.9	83.25	1.013				6.794	1.8	6.383	1.251	7.322	2.959	1.154	4.31	0.831	5.719	1.255	3.477
	(d)	50.4678	37.6792	1631	Segment 27	basalt (whole rock)	SW-V-6	50.1498	14.8555	10.9499	7.49275	11.4689	2.59027	0.213184	0.168274	0.0916944	1.34135	0.176332	99.498			43.66	326.3	205		87.44	71.8			1.47	107.5	30.04	84.28	1.015				7.758	1.739	6.143	1.202	7.068	2.847	1.085	4.252	0.796	5.609	1.224	3.421
	(d)	50.4703	37.6583	1751	Segment 27	basalt (whole rock)	SW-III-8-1	49.7767	14.8875	11.9542	7.76677	11.1134	2.64804	0.0781892	0.166276	0.0568076	1.35396	-0.271186	99.5307			41.89	312.2	214.1		105.7	89.76			0.686	83.69	32.11	79.18	1.004				6.797	2.052	6.95	1.364	8.014	3.124	1.154	4.561	0.9	5.639	1.268	3.628
	(d)	50.4703	37.6583	1751	Segment 27	basalt (whole rock)	SW-III-8-2	49.7503	14.8211	11.9639	7.78088	11.1927	2.58664	0.0886521	0.175334	0.0591702	1.34554	-0.240072	99.5241			38.81	295.9	209.9		104.5	80.74			0.668	84.93	30.74	78.43	1.05				7.999	2.214	8.341	1.536	8.626	3.315	1.198	4.85	0.94	5.998	1.326	3.82
	(d)	50.4703	37.6583	1751	Segment 27	basalt (whole rock)	SW-Ⅲ-9	49.7667	14.8081	12.0119	7.71073	11.2315	2.55077	0.0886219	0.177244	0.0591338	1.36872	-0.252578	99.5208			40.86	313.5	215.6		102.2	85.54			0.646	83.82	33.1	76.37	0.977				7.097	2.116	7.403	1.385	8.197	3.168	1.18	4.661	0.91	6.003	1.321	3.643
	(d)	50.4703	37.6583	1764	Segment 27	basalt (whole rock)	20V-11-3	50.2241	14.8714	10.9021	7.76111	11.4015	2.60193	0.220034	0.170486	0.0962742	1.33493	-0.0844753	99.4992			41.08	306.1	207.5		91.47	49.24			1.504	104.8	30.16	84.09	1.026				7.167	1.811	6.428	1.268	7.331	3.009	1.131	4.351	0.822	5.642	1.233	3.461
	(d)	50.4703	37.6583	1751	Segment 27	basalt (whole rock)	SW-Ⅲ-11-1	47.7547	16.7096	10.9056	9.10934	11.2867	2.86474	0.109772	0.140429	0.0586371	0.821805	-0.24049	99.5208			32.59	184.1	351.1		173.6	84.17			1.127	114.2	17.56	43.51	0.6				4.356	1.422	4.735	0.866	4.74	1.751	0.732	2.427	0.504	3.239	0.731	2.036
	(d)	50.4703	37.6583	1751	Segment 27	basalt (whole rock)	SW-Ⅲ-11-2	47.776	16.8686	10.8858	8.77782	11.4155	2.61525	0.132	0.136926		0.819585	0.0702741	99.4978			33.15	185.3	328.9		171.8	90.15			2.43	121.2	18.04	44.79	0.639				4.248	1.473	4.614	0.863	4.851	1.831	0.748	2.61	0.506	3.266	0.739	2.079
	(d)	50.4704	37.659	1776	Segment 27	basalt (whole rock)	SW-Ⅲ-12	47.8418	16.2056	11.1109	9.68046	11.2073	2.47862	0.143579	0.138628	0.0031907	0.84464	-0.150231	99.5045			30.9	175.4	402.8		213.9	82.87			2.079	108.4	17.07	44.54	0.611				3.344	1.495	4.864	0.919	4.955	1.793	0.753	2.628	0.502	3.42	0.742	2.059
	(d)	50.467	37.6572	1725	Segment 27	basalt (whole rock)	SW-IV-7	47.5483	17.0697	10.7289	8.89649	11.6171	2.42585	0.0681684	0.145494	0.0569766	0.845492	0.00759821	99.4101			32.45	193.8	273.8		150.8	70.91			0.528	188.2	16.7	45.86	0.581				4.96	1.464	4.704	0.872	4.605	1.686	0.691	2.283	0.461	3.118	0.67	1.881
	(d)	50.467	37.6572	1725	Segment 27	basalt (whole rock)	SW-Ⅲ-22	47.6915	17.4124	10.7864	8.34181	11.7125	2.71976	0.082271	0.134443	0.0126019	0.800638	-0.200471	99.4939			32.01	178.5	288.5		157.6	88.83			1.093	120.2	16.86	43.22	0.71				3.21	1.361	4.422	0.871	4.691	1.686	0.756	2.444	0.478	3.171	0.702	1.996
	(d)	50.4627	37.6542	1729	Segment 27	basalt (whole rock)	SW-Ⅲ-14-1	48.2943	16.5578	11.2025	7.88689	11.5639	2.64909	0.196165	0.145162	0.00365898	0.920012	0.0783453	99.4978			34.33	202.8	298.9		129.8	97.13			3.256	114.6	19.45	47.68	0.666				4.242	1.628	5.057	1.106	5.394	1.985	0.838	2.878	0.574	3.608	0.826	2.27
	(d)	50.4627	37.6542	1729	Segment 27	basalt (whole rock)	SW-Ⅲ-14-2	47.9473	15.6245	11.1581	10.4002	10.8862	2.4588	0.157441	0.138627		0.87038	-0.120614	99.5209			32.15	190.5	493.5		274.6	93.36			2.599	110.2	18.23	45.85	0.679				5.802	1.522	4.732	0.904	4.982	1.875	0.79	2.751	0.527	3.42	0.76	2.048
	(d)	50.4627	37.6542	1729	Segment 27	basalt (whole rock)	SW-III-15	48.5619	16.4918	10.9858	8.14372	11.4069	2.62266	0.22813	0.13787		0.927397	-0.0106462	99.4955			33.88	203.2	333.4		158.2	101.7			4.192	113.8	19.62	47.88	0.713				4.02	1.617	5.016	0.947	5.211	1.968	0.83	2.885	0.577	3.549	0.813	2.212
	(e)	50.97	37.61	1889	Segment 27	basalt (whole rock)	SW-III-18	49.32	14.55	12.25	8.21	11.18	2.45	0.1	0.17	0.05	1.28		99.53																				1.79	6.24	1.26	7.54	2.98	1.11	4.5	0.9	5.9	1.35	3.8
	(e)	50.99	37.61	1939	Segment 27	basalt (whole rock)	SW-III-20	48.98	14.46	12.28	8.4	11.04	2.49	0.25	0.17	0.06	1.37		99.53																				2.15	7.2	1.43	8.4	3.38	1.23	4.81	0.953	6.17	1.38	3.68
	(e)	51.72	37.47	1316	Segment 27	basalt (whole rock)	SW-III-21	49.35	14.87	11.37	8.87	11.12	2.46	0.15	0.16	0.04	1.19		99.51																				1.84	6.22	1.24	7.08	2.82	1.06	4.12	0.84	5.33	1.22	3.28
	(e)	50.46	37.65	1729	Segment 27	basalt (whole rock)	SW-III-14-1	48.29	16.56	11.2	7.89	11.56	2.65	0.2	0.15	0	0.92		99.5																				1.63	5.06	1.11	5.39	1.99	0.838	2.88	0.574	3.61	0.826	2.27
	(e)	50.46	37.65	1729	Segment 27	basalt (whole rock)	SW-III-14-2	47.95	15.62	11.16	10.4	10.89	2.46	0.16	0.14	0	0.87		99.52																				1.52	4.73	0.904	4.98	1.88	0.79	2.75	0.527	3.42	0.76	2.05
	(e)	50.47	37.66	1776	Segment 27	basalt (whole rock)	SW-III-12	47.84	16.21	11.11	9.68	11.21	2.48	0.14	0.14	0	0.84		99.5																				1.5	4.86	0.919	4.96	1.79	0.753	2.63	0.502	3.42	0.742	2.06
	(e)	55.71	34.28	2900	Segment 27	basalt (whole rock)	SW-V-1	47.4	14.23	11.31	9.91	10.74	2.71	0.26	0.17	0.13	1.7		99.43																				3.45	10.9	2.01	11.5	3.73	1.26	4.3	0.875	5.93	1.35	3.64
	(e)	50.52	37.69	1648	Segment 27	basalt (whole rock)	SWIR DR2-3
	(k)	50.47	37.66	1776	segment 27	whole rock-XRF	DY0115-020-004-007	47.55	17.07	10.73	8.9	11.62	2.43	0.07	0.15	0.06	0.85	0.01				32.5	194	274		151				0.528	188	16.7	45.9	0.581				4.96	1.46	4.7	0.872	4.61	1.69	0.691	2.28	0.461	3.12	0.67	1.88
	(k)	50.47	37.68	1631	segment 27	whole rock-XRF	DY0115-020-005-006	50.15	14.86	10.95	7.49	11.47	2.59	0.21	0.17	0.09	1.34	0.18				43.7	326	205		87.4				1.47	108	30	84.3	1.02				7.76	1.74	6.14	1.2	7.07	2.85	1.09	4.25	0.796	5.61	1.22	3.42
	(k)	50.47	37.66	1776	segment 27	whole rock-XRF	DY0115-020-005-012	47.84	16.21	11.11	9.68	11.21	2.48	0.14	0.14	0	0.84																						1.5	4.86	0.919	4.96	1.79	0.753	2.63	0.502	3.42	0.742	2.06
	(k)	50.4671	37.6579	1729	segment 27	whole rock-XRF	DY0115-020-005-014-1	48.29	16.56	11.2	7.89	11.56	2.65	0.2	0.15	0	0.92																						1.63	5.06	1.11	5.39	1.99	0.838	2.88	0.574	3.61	0.826	2.27
	(k)	50.4671	37.6579	1729	segment 27	whole rock-XRF	DY0115-020-005-014-2	47.95	15.62	11.16	10.4	10.89	2.46	0.16	0.14		0.87																						1.52	4.73	0.904	4.98	1.88	0.79	2.75	0.527	3.42	0.76	2.05
	(k)	50.47	37.68	1719	segment 27	whole rock-XRF	DY0115-021-005-011-007	50.26	15	10.99	7.56	11.21	2.55	0.22	0.18	0.09	1.4	0.05				41.8	314	212		91.7				1.99	106	29.9	83.3	1.01				6.79	1.8	6.38	1.25	7.32	2.96	1.15	4.31	0.831	5.72	1.26	3.48
	(k)	50.47	37.66	1751	segment 27	whole rock-XRF	DY0115-020-003-008-002	49.75	14.82	11.96	7.78	11.19	2.59	0.09	0.18	0.06	1.35	< 0.24				38.8	296	210		105				0.668	84.9	30.7	78.4	1.05				8	2.21	8.34	1.54	8.63	3.32	1.2	4.85	0.94	6	1.33	3.82
	(k)	50.47	37.66	1751	segment 27	whole rock-XRF	DY0115-020-003-011-001	47.75	16.71	10.91	9.11	11.29	2.86	0.11	0.14	0.06	0.82	< 0.24				32.6	184	351		174				1.13	114	17.6	43.5	0.6				4.36	1.42	4.74	0.866	4.74	1.75	0.732	2.43	0.504	3.24	0.731	2.04
	(k)	50.47	37.66	1725	segment 27	whole rock-XRF	DY0115-020-003-022	47.69	17.41	10.79	8.34	11.71	2.72	0.08	0.13	0.01	0.8	< 0.15				32	179	289		158				1.09	120	16.9	43.2	0.71				3.21	1.36	4.42	0.871	4.69	1.69	0.756	2.44	0.478	3.17	0.702	2
	(k)	50.46	37.65	1729	segment 27	whole rock-XRF	DY0115-020-003-014-002	47.95	15.62	11.16	10.4	10.89	2.46	0.16	0.14		0.87	< 0.12				32.2	191	494		275				2.6	110	18.2	45.9	0.679				5.8	1.52	4.73	0.904	4.98	1.88	0.79	2.75	0.527	3.42	0.76	2.05
	(k)	50.46	37.65	1729	segment 27	whole rock-XRF	DY0115-020-003-015	48.56	16.49	10.99	8.14	11.41	2.62	0.23	0.14		0.93	< 0.01				33.9	203	333		158				4.19	114	19.6	47.9	0.713				4.02	1.62	5.02	0.947	5.21	1.97	0.83	2.89	0.577	3.55	0.813	2.21
	(k)	50.47	37.66	1751	segment 27	whole rock-XRF	DY0115-020-003-008-001	49.78	14.89	11.95	7.77	11.11	2.65	0.08	0.17	0.06	1.35	< 0.27				41.9	312	214		106				0.686	83.7	32.1	79.2	1				6.8	2.05	6.95	1.36	8.01	3.12	1.15	4.56	0.9	5.64	1.27	3.63
	(k)	50.47	37.66	1751	segment 27	whole rock-XRF	DY0115-020-003-009	49.77	14.81	12.01	7.71	11.23	2.55	0.09	0.18	0.06	1.37	< 0.25				40.9	314	216		102				0.646	83.8	33.1	76.4	0.977				7.1	2.12	7.4	1.39	8.2	3.17	1.18	4.66	0.91	6	1.32	3.64
	(k)	50.47	37.66	1764	segment 27	whole rock-XRF	DY0115-020-005-011-3	50.22	14.87	10.9	7.76	11.4	2.6	0.22	0.17	0.1	1.33	< 0.08				41.1	306	208		91.5				1.5	105	30.2	84.1	1.03				7.17	1.81	6.43	1.27	7.33	3.01	1.13	4.35	0.822	5.64	1.23	3.46
	(k)	50.47	37.66	1751	segment 27	whole rock-XRF	DY0115-020-003-011-002	47.78	16.87	10.89	8.78	11.42	2.62	0.13	0.14		0.82	0.07				33.2	185	329		172				2.43	121	18	44.8	0.639				4.25	1.47	4.61	0.863	4.85	1.83	0.748	2.61	0.506	3.27	0.739	2.08
	(k)	50.47	37.66	1776	segment 27	whole rock-XRF	DY0115-020-003-012	47.84	16.21	11.11	9.68	11.21	2.48	0.14	0.14		0.84	< 0.2				30.9	175	403		214				2.08	108	17.1	44.5	0.611				3.34	1.5	4.86	0.919	4.96	1.79	0.753	2.63	0.502	3.42	0.742	2.06
	(k)	50.46	37.65	1729	segment 27	whole rock-XRF	DY0115-020-003-014-001	48.29	16.56	11.2	7.89	11.56	2.65	0.2	0.15		0.92	0.08				34.3	203	299		130				3.26	115	19.5	47.7	0.666				4.24	1.63	5.06	1.11	5.39	1.99	0.838	2.88	0.574	3.61	0.826	2.27
	(k)	50.47	37.68	1640	segment 27	whole rock-XRF	DY0115-021-005-014-008	50.23	15.04	11.07	7.44	11.23	2.6	0.16	0.18	0.09	1.39	0.05				43.8	323	213		89.7				1.54	105	29.5	83.5	1.01				7.31	1.78	6.22	1.21	7.03	2.85	1.13	4.18	0.784	5.46	1.18	3.33
	(k)	50.47	37.66	1776	segment 27	glass-EMPA data	DY0115-019-003-008-001	49.8	14.9	12	7.77	11.1	2.65	0.08	0.17	0.06	1.35																						2.05	6.95	1.36	8.01	3.12	1.15	4.56	0.9	5.64	1.27	3.63
	(k)	50.47	37.66	1776	segment 27	glass-EMPA data	DY0115-019-003-008-002	49.8	14.8	12	7.78	11.2	2.59	0.09	0.18	0.06	1.35																						2.21	8.34	1.54	8.63	3.32	1.2	4.85	0.94	6	1.33	3.82
	(k)	50.47	37.66	1776	segment 27	glass-EMPA data	DY0115-019-003-009	49.8	14.8	12	7.71	11.2	2.55	0.09	0.18	0.06	1.37																						2.12	7.4	1.39	8.2	3.17	1.18	4.66	0.91	6	1.32	3.64
	(k)	50.47	37.66	1776	segment 27	glass-EMPA data	DY0115-019-003-010	48.3	16.7	10.3	7.87	11.9	2.61	0.2	0.13	0.01	0.91																						1.66	5.47	1.04	5.67	2.07	0.86	2.93	0.57	3.54	0.81	2.21
	(k)	50.47	37.66	1776	segment 27	glass-EMPA data	DY0115-019-003-011-002	47.8	16.9	10.9	8.78	11.4	2.62	0.13	0.14		0.82																						1.47	4.61	0.86	4.85	1.83	0.75	2.61	0.51	3.27	0.74	2.08
	(k)	50.47	37.66	1776	segment 27	glass-EMPA data	DY0115-019-003-012	47.8	16.2	11.1	9.68	11.2	2.48	0.14	0.14	0	0.84																						1.5	4.86	0.92	4.96	1.79	0.75	2.63	0.5	3.42	0.74	2.06
	(k)	50.46	37.65	1776	segment 27	glass-EMPA data	DY0115-019-003-014-002	47.9	15.6	11.2	10.4	10.9	2.46	0.16	0.14		0.87																						1.52	4.73	0.9	4.98	1.88	0.79	2.75	0.53	3.42	0.76	2.05
	(k)	50.47	37.66	1776	segment 27	glass-EMPA data	DY0115-020-004-007	47.5	17.1	10.7	8.9	11.6	2.43	0.07	0.15	0.06	0.85																						1.46	4.7	0.87	4.61	1.69	0.69	2.28	0.46	3.12	0.67	1.88
	(k)	50.47	37.68	1631	segment 27	glass-EMPA data	DY0115-020-005-006	50.7	15.4	9.81	6.93	11.8	2.44	0.2	0.17	0.1	1.27																						1.74	5.95	1.1	6.65	2.68	1.17	3.7	0.72	5.08	1.22	3.43
	This study	49.6647	37.8112	2398	segment 28	basaltic glass-XRF	DY30II-1	49.08	18.68	9.68	6.02	12.14	2.67	0.13	0.147	0.102	1.159	-0.12	99.688	4.68	0.439	32.3	226	194	35.2	61.4	64.5	68.8	17.1	1.37	137	29.4	91.5	1.44	1.28	0.031	0.0205	40.7	2.34	7.59	1.37	7.69	2.83	1.06	4.01	0.737	4.79	1.06	3.04
	This study	49.6872	37.7386	2946	segment 28	basaltic glass-XRF	30IV-TVG04	49.2	18.17	9.94	6.17	11.98	2.68	0.2	0.152	0.105	1.224	-0.01	99.811	4.57	0.457	33.7	236	191	36.2	63.7	63.4	70.6	17.1	2.25	135	30.8	95.7	1.56	0.983	0.0209	0.0497	18.3	2.58	8.17	1.45	8.07	2.93	1.1	4.16	0.767	4.94	1.1	3.16
	(f)	49.882	37.71	3260	Segment 28	whole-XRF	MD34D3	50.48	14.6029	10.9682	8.36138	12.095	2.31533	0.0574681	0.176964	0.115454	1.17146		99.2452			31.0112	302.324	296.393	43.9483	131.439	106.253	91.9205		0.656868	73.2991	31.6531	72.6297	0.989807			0.0534262	6.29002	1.82654	6.61461	1.2088	6.86337	2.65906	0.993486	3.90486	0.743902	4.85407	1.16579	3.10279
	(f)	49.85	37.69	2800	Segment 28	whole-XRF	DUF0107-073
	(f)	49.882	37.71	3260	Segment 28	whole-XRF	DUF0034-003	50.4844	14.8564	10.9912	9.17	11.5993	2.01387	0.06	0.13	0.128	1.28812		99.6201			38.1	319	333	46.9	131.8	115.5	76.6	16.96	0.61	68.82	33.556	73.207	1.295			0.00667	6.739	1.805	6.279	1.176	6.972	2.74	1.038	3.92832	0.796	5.509	1.195	3.52387
	(f)	49.882	37.71	3260	Segment 28	whole-XRF	MD34-D3	50.48	14.6029	10.9682	8.36138	12.095	2.31533	0.0574681	0.176964	0.115454	1.17146		99.2452			31.0112	302.324	296.393	43.9483	131.439	106.253	91.9205		0.656868	73.2991	31.6531	72.6297	0.989807			0.0534262	6.29002	1.82654	6.61461	1.2088	6.86337	2.65906	0.993486	3.90486	0.743902	4.85407	1.16579	3.10279
	(g)	49.7819	37.8643		Segment 28	glass-XRF	30-TVG3-3	49.3	15.92	10.8356	6.65	11.58	2.71	0.34	0.205	0.195	1.575	0.498213	98.225			43.2	331	263	49.8	127	91.9	105	17.5	1.29	93.1	42.5	97.5	1.91			0.0852	11.2	3.11	9.92	1.75	10	3.79	1.33	4.98	1.01	6.89	1.53	4.47
	(g)	49.6385	37.7819		Segment 28	glass-XRF	30-TVG10	50.825	15.945	9.91874	7.33	11.65	2.74	0.345	0.2	0.14	1.27	0.330516	99.37			42.2	311	348	46.4	145	101	84.9	16.5	0.736	88.1	38.5	86.3	1.23			0.0157	6.37	2.08	7.35	1.44	8.54	3.37	1.21	4.45	0.91	6.23	1.38	4
	(g)	49.6561	37.7889		Segment 28	glass-XRF	Dy115-D13	50.03	18.17	8.32007	6.84	12.435	2.475	0.285	0.17	0.1	0.965	0.317116	98.9565			42	291	353	46	152	88.6	83	16.3	0.838	102	37.9	93.3	1.41			0.016	6.91	2.41	8.27	1.56	8.96	3.43	1.22	4.43	0.902	6.1	1.35	3.91
	(a)	49.6872	37.7386	2946	Segment 28	basalt (whole rock)	SW28-6	48.6373	16.7421	8.06241	10.4597	13.8751	1.14844	0.0410144	0.125094	0.0328115	0.493198	0.22287	99.6171			32.88	200.4	404.2	51.23	208.9	103.5	78.45	13.16	0.226	46.04	16.49	18.38	0.233			0.007	2.099	0.388	1.468	0.316	2.124	1.049	0.456	1.837	0.376	2.579	0.583	1.733
	(b)	49.64	37.77	2941	Segment 28	basalt (whole rock)	DY115-17-3	48.9	14.6	13.1	8.59	10.8	2.57	0.09	0.23	0.12	1.42		100.42					360		158	100						90.5						2.72	8.62	1.69	9.54	3.44	1.23	5.01	0.97	6.33	1.35	3.83
	(b)	49.64	37.77	2941	Segment 28	basalt (whole rock)	DY115-17-4	49.3	14.6	12.4	8.58	10.9	2.57	0.11	0.19	0.12	1.42		100.19					360		167	100						95						2.57	8.63	1.71	9.74	3.53	1.23	5.01	0.96	6.36	1.36	3.76
	(b)	49.64	37.77	2941	Segment 28	basalt (whole rock)	DY115-17-5	49.1	14.6	12.9	8.61	10.8	2.58	0.09	0.23	0.12	1.42		100.45					377		167	105						92.8						2.74	8.86	1.78	9.86	3.62	1.26	5.05	0.97	6.38	1.39	3.93
	(e)	49.65	37.77	2875	Segment 28	basalt (whole rock)	DY115-17-2A	49.13	14.59	11.62	8.53	10.92	3.21	0.16	0.19	0.12	1.4		99.87																				2.59	8.68	1.69	9.31	3.46	1.21	4.87	0.918	6.01	1.29	3.67
	(c)	49.6481	37.7791	2780	Segment 28	basalt (whole rock)	TVG16	46.75	11.48	16.09	8.32	11.04	2.92	0.1	0.28	0.11	1.846	0.52	98.936													40							2.73	8.77	1.69	10.4	3.52	1.3	4.53	1.05	6.88	1.42	4.45
	(a)	49.6385	37.7819	2936	Segment 28	basalt (whole rock)	SW28-14	49.4326	14.4619	11.3883	8.6862	11.552	2.32218	0.113914	0.175489	0.109809	1.32079	-0.193237	99.5632			41.14	299.1	315.1	48.44	142	91.04	96.46	17.27	0.635	88.62	37.48	85.3	1.085			0.018	6.51	1.911	7.003	1.396	8.447	3.244	1.144	4.832	0.908	5.955	1.315	3.794
	(c)	49.6584	37.7829	2850	Segment 28	basalt (whole rock)	D13A	48.91	12.37	13.1	8.88	11.67	2.65	0.08	0.22	0.089	1.552	0.1	99.521													34.6							2.31	7.66	1.45	8.85	3.11	1.21	4.11	0.93	6.24	1.24	3.92
	(c)	49.6584	37.7829	2850	Segment 28	basalt (whole rock)	D13B	49.38	13.52	12.24	7.93	11.75	2.78	0.08	0.2	0.087	1.463	0.1	99.43													35.7							2.47	8.12	1.52	9.03	3.34	1.18	4.2	0.956	6.33	1.22	3.88
	(a)	49.6504	37.7832	2800	Segment 28	basalt (whole rock)	SW28-13	49.9273	14.376	11.7398	8.64699	11.2809	2.42413	0.189253	0.187196	0.118283	1.33197	-0.15183	100.222			40.16	283.4	337.7	47.06	155.3	71.65	101.5	17.04	1.063	96.43	37.56	96.04	1.457			0.037	8.292	2.347	8.269	1.575	9.238	3.397	1.204	4.961	0.937	6.138	1.353	3.93
	(c)	49.6527	37.7835	2824	Segment 28	basalt (whole rock)	TVG6	48.52	12.4	13.76	8.73	11.27	2.68	0.09	0.24	0.1	1.705	0.1	99.495													38.3							2.81	9.2	1.55	9.85	3.31	1.36	4.54	1.03	6.38	1.3	4.13
	(a)	49.7988	37.8033	1916	Segment 28	basalt (whole rock)	SW28-1	49.6505	17.4927	10.0426	5.42098	12.9738	2.03066	0.316897	0.16356	0.107336	1.13265	0.37831	99.3317			37.34	283.3	242	43.02	56.11	69.48	95.79	17.3	5.615	94.04	33.73	71.84	1.17			0.308	8.993	2.174	6.793	1.3	7.687	2.894	1.062	4.392	0.828	5.352	1.195	3.421
	(a)	49.7736	37.8246	1705	Segment 28	basalt (whole rock)	SW28-4	49.7329	14.5716	11.901	7.33224	11.325	2.10998	0.427091	0.18477	0.117122	1.42667	0.281667	99.1283			42.59	320.3	254.3	46.77	110.3	82.43	104.6	17.55	7.312	91.14	39.61	91.14	1.297			0.43	9.032	2.246	7.972	1.541	9.205	3.505	1.251	5.152	0.973	6.398	1.422	4.111
	(a)	49.6613	37.8322	2165	Segment 28	basalt (whole rock)	SW28-7	48.6597	15.0386	10.6003	8.5355	9.06729	3.58899	0.0807331	0.149356	0.0837606	1.17769	2.50813	96.9819			38.73	257.4	388	49.46	181.8	376.3	90.21	16.48	0.508	98.97	30.24	69.19	0.982			0.064	4.689	1.721	5.942	1.23	7.307	2.717	1	4.047	0.754	4.958	1.096	3.151
	(a)	49.7819	37.8463	1540	Segment 28	basalt (whole rock)	SW28-2	49.9179	14.0727	12.7207	6.95771	11.1248	2.14177	0.464596	0.174607	0.115383	1.49488	0.29496	99.185			42.72	309.3	226.3	43.48	103.2	76.06	162.3	17.75	7.646	86.71	41.2	90.27	1.603			0.477	10.17	2.457	8.306	1.624	9.676	3.623	1.302	5.35	1.018	6.751	1.482	4.256
	(a)	49.7755	37.8489	1631	Segment 28	basalt (whole rock)	SW28-3	50.7161	15.2789	11.6234	5.40747	11.8171	2.43869	0.29166	0.159645	0.118711	1.58929	0.569097	99.4409			47.5	362.3	254.4	45.04	89.55	85.43	123.2	20.17	3.805	98.91	46.15	104.1	1.833			0.191	12.03	2.811	9.616	1.836	10.98	4.072	1.455	6.062	1.135	7.464	1.66	4.83
	(a)	49.7125	37.8512	1634	Segment 28	basalt (whole rock)	SW28-5	49.2487	14.9965	11.8797	8.06692	11.4445	2.2441	0.154431	0.177387	0.103302	1.37631	0.0782473	99.6918			41.46	304	269	54	128	80.83	106.7	17.65	1.622	99.39	37.27	87.17	1.447			0.054	12.15	2.207	7.569	1.44	8.637	3.284	1.192	4.808	0.907	6.008	1.324	3.8
	(a)	49.6537	37.8768	2216	Segment 28	basalt (whole rock)	SW28-11	48.8915	14.8234	11.6	7.52041	11.2967	2.464	0.101445	0.158379	0.104551	1.3602	1.35935	98.3207			43.26	301.6	255.2	45.57	134.5	89.3	97.1	18.45	0.636	82.8	36.93	82.17	1.374			0.075	4.835	2.231	7.524	1.442	8.575	3.251	1.18	4.847	0.896	6.007	1.317	3.735
	(d)	49.6527	37.7835	2824	Segment 28	basalt (whole rock)	21V-29-6	49.7484	14.4399	11.1242	8.58852	11.0279	2.59935	0.145883	0.172452	0.120315	1.34064	0.193086	99.5006			39.81	286.5	342.6		143.5	78.12			1.095	103.1	34.01	94.65	1.244				8.133	2.296	7.995	1.54	8.713	3.396	1.208	4.834	0.91	6.189	1.336	3.758
	(d)	49.652	37.7822	2831	Segment 28	basalt (whole rock)	SW-Ⅲ-5	49.6922	14.4454	11.869	8.4731	10.9304	2.59648	0.108686	0.164017	0.0719298	1.40106	-0.218516	99.5338			41.23	302.5	358.4		157.3	88.56			0.938	85.51	36.13	91.85	1.303				7.964	2.495	8.455	1.686	9.36	3.638	1.241	5.093	1.039	6.4	1.458	3.935
	(d)	49.652	37.7822	2831	Segment 28	basalt (whole rock)	SW-Ⅲ-6	49.6091	14.4254	11.8706	8.42885	10.9541	2.72016	0.127759	0.163413	0.0722114	1.39446	-0.221755	99.5443			37.29	277.5	338.3		149.7	84.64			0.877	81.44	33.15	92.38	1.271				7.195	2.426	8.445	1.711	9.614	3.691	1.262	5.186	0.983	6.649	1.405	4.089
	(d)	49.6502	37.7832	3000	Segment 28	basalt (whole rock)	SW-Ⅲ-1	49.4595	14.1968	12.3591	8.54161	11.3381	2.28948	0.11243	0.176822	0.126739	1.45035	-0.271831	99.7791			40.78	295.9	333		155.1	88.69			0.924	83.9	35.9	90.83	1.274				7.42	2.455	8.421	1.654	9.233	3.515	1.218	5.012	0.996	6.467	1.453	4.025
	(d)	49.6502	37.7832	3000	Segment 28	basalt (whole rock)	SW-Ⅲ-2	49.4952	14.1756	12.4159	8.54056	11.3401	2.49923	0.0853645	0.173814	0.127533	1.45428	-0.520578	99.7871			39.85	289.8	353.6		152.2	88.02			0.836	84.22	35.43	90.67	1.296				7.044	2.4	8.153	1.628	9.282	3.463	1.217	5.005	1.007	6.285	1.449	3.976
	(d)	49.65	37.7836	2752	Segment 28	basalt (whole rock)	SW-8-A	49.06	14.56	12.31	8.55	10.85	2.65	0.13	0.23	0.12	1.43	-0.19	99.7			41.73	304.5	351.3		164.8	98.01			1.027	88.4	34.78	93.84	1.337				9.592	2.954	9.455	1.811	10.04	3.698	1.253	5.229	0.983	6.522	1.42	3.876
	(d)	49.65	37.7836	2752	Segment 28	basalt (whole rock)	SW-8-B	49.07	14.52	12.52	8.51	10.85	2.6	0.14	0.21	0.12	1.43	-0.25	99.72			42.17	304.9	381.1		166.1	100.2			1.02	86.33	35.16	93.57	1.275				8.388	2.668	8.729	1.72	9.762	3.598	1.269	5.18	0.957	6.473	1.369	3.939
	(d)	49.65	37.7836	2752	Segment 28	basalt (whole rock)	SW-8-C	49.02	14.52	12.45	8.51	10.86	2.6	0.14	0.26	0.12	1.42	-0.2	99.7			43.62	317.7	370.4		172.5	98.83			0.975	91.9	36.21	95.88	1.393				10.73	3.231	9.974	1.866	10.27	3.716	1.295	5.296	0.974	6.551	1.384	4.034
	(d)	49.65	37.7836	2752	Segment 28	basalt (whole rock)	SW-9-A	49.13	14.6	12.81	8.6	10.83	2.62	0.09	0.22	0.12	1.42	-0.74	99.7			42.17	305	383.9		166.9	105.7			0.836	86.7	34.92	94.21	1.285				8.607	2.653	8.849	1.715	9.639	3.499	1.237	5.025	0.975	6.137	1.353	3.789
	(d)	49.65	37.7836	2752	Segment 28	basalt (whole rock)	SW-9-B	48.86	14.52	12.36	8.52	10.9	2.78	0.15	0.27	0.12	1.42	-0.19	99.71			43.51	315.1	377.1		173.1	101.7			1.27	94.36	35.45	95.41	1.393				11.18	3.385	10.13	1.9	10.33	3.642	1.257	5.193	0.97	6.318	1.35	3.981
	(d)	49.65	37.7836	2752	Segment 28	basalt (whole rock)	SW-9-C	48.58	14.44	12.34	8.42	10.75	3.62	0.14	0.2	0.12	1.41	-0.32	99.7			41.85	301	367		160.9	99.77			0.986	85.55	34.13	93.07	1.285				8.43	2.595	8.714	1.73	9.64	3.483	1.227	5.05	0.958	6.308	1.344	3.786
	(d)	49.65	37.7836	2752	Segment 28	basalt (whole rock)	SW-Ⅱ-1	49.4355	14.6541	11.9382	8.71832	10.9817	2.60883	0.09292	0.19493	0.12019	1.42713	-0.333363	99.8384			40.04	293	343.6		156.6	93.65			0.955	83.5	33.53	90	1.268				8.032	2.508	8.479	1.646	9.279	3.466	1.179	4.915	0.904	6.074	1.331	3.629
	(d)	49.6492	37.7833	2784	Segment 28	basalt (whole rock)	21V-3-1	50.0883	14.5773	11.1926	8.68265	10.8243	2.52686	0.112719	0.177724	0.120137	1.3891	-0.190366	99.5013			40.7	291.3	340		150.6	83.44			0.965	102.1	33.86	94.03	1.265				7.966	2.405	8.275	1.584	9.106	3.413	1.214	5.064	0.927	6.37	1.386	3.93
	(d)	49.6484	37.7831	2805	Segment 28	basalt (whole rock)	SW-Ⅲ-3	49.4203	14.4429	11.6856	8.48035	10.8935	3.2077	0.12168	0.164856	0.0673125	1.3689	-0.271831	99.5814			41.35	296.7	362.8		157.3	87.85			0.787	83.44	35.27	91.07	1.281				7.136	2.482	8.149	1.634	9.398	3.374	1.223	5.035	0.998	6.431	1.426	3.933
	(d)	49.6484	37.7831	2805	Segment 28	basalt (whole rock)	SW-Ⅲ-4-1	49.8563	14.5763	11.8179	8.4861	10.9523	2.62496	0.122889	0.166495	0.0703728	1.38349	-0.520578	99.5366			40.55	300.3	365.2		157.2	89.25			0.956	84.72	35.43	91.67	1.266				7.312	2.541	8.405	1.644	9.327	3.612	1.256	5.162	0.995	6.459	1.453	3.962
	(d)	49.6484	37.7831	2805	Segment 28	basalt (whole rock)	SW-Ⅲ-4-2	49.701	14.4996	11.7857	8.71049	11.0977	2.34349	0.10193	0.180198	0.124683	1.39972	-0.280565	99.6639			40.73	297.3	366.3		158.1	88.21			1.019	85.47	35.42	90.6	1.313				7.204	2.443	8.418	1.652	9.233	3.503	1.251	5.064	0.979	6.376	1.428	3.994
	(d)	49.6482	37.784	2825	Segment 28	basalt (whole rock)	20IV-7-1	50.1316	14.62	11.1997	8.72319	10.8567	2.55135	0.117308	0.180962	0.122975	1.39888	-0.400372	99.5023			39.49	282.4	347		148.1	81.13			0.868	102.4	34.51	94.1	1.288				8.313	2.363	8.187	1.549	8.929	3.422	1.193	4.938	0.907	6.104	1.332	3.885
	(d)	49.6482	37.784	2825	Segment 28	basalt (whole rock)	SW-Ⅲ-7	49.7215	14.4633	11.9072	8.50259	10.9582	2.65148	0.0770044	0.165856	0.0727862	1.392	-0.371908	99.54			41.45	305.9	355.2		155.7	91.39			0.868	85.39	36.12	90.93	1.305				7.134	2.459	8.335	1.67	9.433	3.481	1.215	4.845	1.014	6.258	1.432	4.045
	(d)	49.6482	37.784	2825	Segment 28	basalt (whole rock)	SW-IV-2 g	49.7036	14.4229	11.7897	8.59172	10.9688	2.54588	0.0725687	0.172734	0.127762	1.45955	-0.492822	99.3624			40.06	314.4	338.9		157.3	89.23			0.934	131.7	34.34	96.56	1.402				11.52	2.493	8.597	1.687	9.274	3.507	1.202	4.606	0.962	6.317	1.37	3.823
	(d)	49.6481	37.7802	2780	Segment 28	basalt (whole rock)	SW-Ⅲ-17	49.8361	14.5092	12.0475	8.10692	10.8881	2.6353	0.104297	0.168253	0.0780974	1.45131	-0.289251	99.5359			42.07	317.1	325.9		141.9	96.49			1.214	84.37	38.44	96.44	1.377				7.863	2.64	8.873	1.74	9.83	3.764	1.313	5.519	1.093	6.986	1.531	4.223
	(d)	49.6469	37.7718	2875	Segment 28	basalt (whole rock)	IR-2	49.13	14.59	11.62	8.53	10.92	3.21	0.16	0.19	0.12	1.4	-0.15	99.72			43.19	303.9	376.4		158.2	85.97			1.132	90.64	33.93	91.35	1.324				7.949	2.586	8.675	1.693	9.307	3.457	1.205	4.873	0.918	6.008	1.286	3.671
	(d)	49.6421	37.7715	2941	Segment 28	basalt (whole rock)	SW-3	48.94	14.55	13.06	8.59	10.83	2.57	0.09	0.23	0.12	1.42	-0.68	99.72			37.01	279	359.9		158.1	100.4			0.822	84.08	32.95	90.46	1.244				8.777	2.724	8.616	1.688	9.537	3.437	1.227	5.012	0.971	6.326	1.35	3.832
	(d)	49.6421	37.7715	2941	Segment 28	basalt (whole rock)	SW-4	49.29	14.61	12.37	8.58	10.87	2.57	0.11	0.19	0.12	1.42	-0.42	99.71			43.1	305.7	359.7		167	99.69			1.036	86.97	34.93	95	1.262				8.079	2.572	8.626	1.707	9.735	3.533	1.232	5.012	0.961	6.356	1.357	3.759
	(d)	49.6421	37.7715	2941	Segment 28	basalt (whole rock)	SW-5	49.12	14.61	12.94	8.61	10.83	2.58	0.09	0.23	0.12	1.42	-0.85	99.7			40.93	301.5	376.9		166.7	105.3			0.887	86.92	34.86	92.82	1.267				8.534	2.74	8.861	1.777	9.862	3.619	1.258	5.051	0.966	6.384	1.391	3.932
	(e)	48.6	38.13	2274	Segment 28	basalt (whole rock)	SW-V-4	49.3	14.78	10.59	9.33	11.14	2.22	0.11	0.17	0.09	1.09		99.43																				1.66	5.35	1	5.93	2.39	0.978	3.43	0.633	4.4	1.07	2.91
	(e)	49.65	37.77	2875	Segment 28	basalt (whole rock)	IR-2	49.13	14.59	11.62	8.53	10.92	3.21	0.16	0.19	0.12	1.4		99.7																				2.59	8.68	1.69	9.31	3.46	1.21	4.87	0.918	6.01	1.29	3.67
	(e)	49.65	37.78	2752	Segment 28	basalt (whole rock)	SW-8-B	49.07	14.52	12.52	8.51	10.85	2.6	0.14	0.21	0.12	1.43		99.7																				2.67	8.73	1.72	9.76	3.6	1.27	5.18	0.957	6.47	1.37	3.94
	(e)	49.65	37.78	2752	Segment 28	basalt (whole rock)	SW-9-A	49.13	14.6	12.81	8.6	10.83	2.62	0.09	0.22	0.12	1.42		99.71																				2.65	8.85	1.72	9.64	3.5	1.24	5.03	0.975	6.14	1.35	3.79
	(k)	49.882	-37.71	3260	segment 28	glass-EMPA data	DUF0034-003-glass	50.4844	14.8564	11.8935	9.1717	11.5993	2.01387	0.06		0.128	1.28812			8.35			319	333		131.8				0.61	68.82	33.556	73.207	1.295			0.00667	6.739	1.805	6.279	1.176	6.972	2.74	1.038	3.92832	0.796	5.509	1.195	3.52387
	(k)	49.77	-37.79	2300	segment 28	glass-EMPA data	DUF0107-076-002-003	50.14	14.99	1.3	7.37	11.4	2.4	0.03	0.16	0.28	1.4
	(k)	49.64	-37.77	2941	segment 28	whole rock-EMPA data	DY0115-017-003	48.9	14.6	13.1	8.59	10.8	2.57	0.09	0.23	0.12	1.42							360		158							90.5						2.72	8.62	1.69	9.54	3.44	1.23	5.01	0.97	6.33	1.35	3.83
	(k)	49.64	-37.77	2941	segment 28	whole rock-EMPA data	DY0115-017-004	49.3	14.6	12.4	8.58	10.9	2.57	0.11	0.19	0.12	1.42							360		167							95						2.57	8.63	1.71	9.74	3.53	1.23	5.01	0.96	6.36	1.36	3.76
	(k)	49.64	-37.77	2941	segment 28	whole rock-EMPA data	DY0115-017-005	49.1	14.6	12.9	8.61	10.8	2.58	0.09	0.23	0.12	1.42							377		167							92.8						2.74	8.86	1.78	9.86	3.62	1.26	5.05	0.97	6.38	1.39	3.93
	(k)	49.882	-37.71	3260	segment 28	WHOLE ROCK	DUF0034-003-whole rock
	(k)	49.85	-37.69	2800	segment 28	WHOLE ROCK	DUF0107-073-002
	(k)	49.65	-37.77	2875	segment 28	WHOLE ROCK	DY0105-017-002A-2nd
	(k)	49.65	-37.78		segment 28	WHOLE ROCK	DY0115-021-005-003-001
	(k)	49.65	-37.78		segment 28	WHOLE ROCK	DY0115-021-005-029-006
	This study	63.9358	27.849	2958	Mountain Jourdanne	basaltic glass-XRF	30I-TVG02-1	51.02	19.62	6.61	5.58	11.09	3.78	0.2	0.108	0.118	0.988	0.55	99.664	4.14	0.641	28.9	146	240	26	51.1	55.5	43.2	15.1	1.74	258	21.2	105	3.04	1.04	0.0251	0.0365	19.2	4.01	11.2	1.73	8.4	2.45	0.99	3.15	0.551	3.47	0.758	2.16
	This study (No. 215)	63.9358	27.849	2958	Mountain Jourdanne	glass-EMPA data	30I-2-1-4-1	50.814	15.826	9.03967	6.713	10.863	4.222	0.223	0.174		1.393		98.407
	This study (No. 217)	63.9358	27.849	2958	Mountain Jourdanne	glass-EMPAdata	30I-2-1-5	50.927	15.688	9.11857	6.758	11.023	4.177	0.275	0.155		1.393		98.656
	This study (No. 218)	63.9358	27.849	2958	Mountain Jourdanne	glass-EMPAdata	30I-2-1-6	50.94	15.785	9.15525	6.859	11.043	4.143	0.246	0.138		1.416		98.858
	This study (No. 221)	63.9358	27.849	2958	Mountain Jourdanne	glass-EMPAdata	30I-2-1-9	50.739	15.698	9.1308	6.821	10.848	4.363	0.226	0.175		1.409		98.574
	This study (No. 232)	63.9358	27.849	2958	Mountain Jourdanne	glass-EMPAdata	30I-2-1-14	51.254	15.806	9.24749	7.088	10.545	4.36	0.246	0.126		1.42		99.216
	This study (No. 256)	63.9358	27.849	2958	Mountain Jourdanne	glass-EMPAdata	30I-2-1-23	51.301	15.718	9.01966	6.929	10.895	4.197	0.273	0.181		1.384		98.994
	(h)	63.927	27.8511	2839	Mountain Jourdanne	whole rock-XRF	87-S01	50.9	16.94	7.95	7.26	10.84	3.92	0.27	0.14	0.14	1.23	0.4	100.01			35.2	199	202	109.5	93	61.5	55		1	203	24.3	117.5	3.6				19.9	4.4	14	1.93	9.4	2.89	1.06	3.62	0.62	4.26	0.93	2.37
	(h)	63.923	27.8512	2762	Mountain Jourdanne	whole rock-XRF	87-S02	51.12	17.33	7.8	7.16	10.79	3.86	0.19	0.13	0.13	1.18	−0.40	99.29			34.2	192	205	232	88.5	76.5	54		0.6	214	22.6	107	4.4				20.4	3.8	11.5	1.9	9.6	2.73	1.11	3.7	0.63	4.18	0.84	2.41
	(h)	63.926	27.8511	2762	Mountain Jourdanne	whole rock-XRF	87-S03	50.74	17.96	7.32	6.73	11.05	3.91	0.2	0.13	0.14	1.14	−0.20	99.11			32.5	185	192	154.5	85.8	60.4	51		0.5	225	21.9	106.5	3.3				20.1	3.7	11.1	1.87	9.5	2.83	1.14	3.4	0.65	4.01	0.89	2.46
	(h)	63.9267	27.8508	2816	Mountain Jourdanne	whole rock-XRF	87-S06	50.57	17.2	7.84	6.99	10.88	3.86	0.27	0.13	0.14	1.22	0	99.11			34.3	197	182	99.2	84.4	53.5	55		2.1	208	24	114.5	3.8				19.8	4.6	14.5	1.87	9.3	2.9	1.11	3.38	0.65	3.95	0.88	2.41
	(i)	63.36	28.11	4950	near area of Mountain Jourdanne	glass-SIMS data	ED22-2-1	49	17.77	11.0023	8.31	10.44	3.25	0.11	0.19	0.09	0.95		100.04			39	157	286	50	145	96.5	62.6		0.8	116.3	27.7	55.5	1.6				7.9	2.2	6.8	1	5.6	1.9	0.8	3.1	0.6	4.6	1.1	3.2
	(i)	64.06	27.51	2650	Mountain Jourdanne	glass-SIMS data	SMS19-4-4	51.14	17.09	8.51289	7.85	10.28	3.79	0.14	0.15	0.16	1.28		99.55			33	223	309	38	129	61.7	59.4		1.2	180.1	30.5	91.3	2.2				12.4	4.1	12.6	1.9	9.7	2.9	1.1	3.9	0.7	4.5	0.9	2.7
	(j)	63.936	27.849	2958	Mountain Jourdanne	glass-EMPA data	30I-TVG2-1-GL1-1	51.754	16.008	8.14837	6.761	10.621	4.008	0.261	0.123	0.188	1.725		98.853											2.10813	215.943	29.1021	125.435	4.16204				24.3315	5.60125	16.3105	2.28672	12.6628	3.80581	1.33066	4.34318	0.729176	5.20985	1.03535	3.10175
	(j)	63.936	27.849	2958	Mountain Jourdanne	glass-EMPA data	30I-TVG2-1-GL1-2	51.764	15.931	8.21283	7.116	10.663	4.005	0.236	0.103	0.219	1.353		98.78											1.39531	223.829	27.9917	126.283	4.28516				25.4185	5.56903	16.3567	2.46317	11.8877	3.53979	1.31801	4.09072	0.781922	5.03495	1.03016	3.04354
	(j)	63.936	27.849	2958	Mountain Jourdanne	glass-EMPA data	30I-TVG2-1-GL1-3	51.726	15.906	7.96722	6.901	10.52	4.007	0.258	0.062	0.176	1.257		97.982											2.2223	212.032	28.0484	126.816	4.0547				25.1897	5.53437	16.7562	2.56289	12.0136	3.80346	1.30409	4.1899	0.776168	4.95815	1.06341	3.49841
	(j)	63.936	27.849	2958	Mountain Jourdanne	glass-EMPA data	30I-TVG2-1-GL1-4	51.661	15.861	8.08169	6.879	10.592	4.072	0.246	0.126	0.203	1.258		98.17											2.14913	212.705	28.8488	122.919	4.24434				25.6057	5.58854	16.6847	2.30117	12.3676	3.77488	1.32193	3.46357	0.741823	5.08453	1.14447	3.30424
	(j)	63.936	27.849	2958	Mountain Jourdanne	glass-EMPA data	30I-TVG2-1-GL1-5	52.052	15.802	8.32618	6.978	10.507	3.838	0.258	0.178	0.171	1.505		98.813											2.06191	209.42	28.414	128.535	4.13345				23.8607	5.4289	16.0979	2.371	11.6611	3.91966	1.39278	3.83603	0.772037	5.12954	1.02958	3.21848
	(j)	63.936	27.849	2958	Mountain Jourdanne	glass-EMPA data	30I-TVG2-1-GL1-6	52.02	15.919	8.06057	6.877	10.438	4.055	0.257	0.197	0.178	1.189		98.419											1.91847	207.782	28.4869	120.695	4.15214				25.5748	5.53938	15.6335	2.50652	11.2011	3.33663	1.38333	4.12762	0.759222	4.83023	0.989714	3.08754
	(j)	63.936	27.849	2958	Mountain Jourdanne	glass-EMPA data	30I-TVG2-1-GL1-7	51.335	15.783	8.20171	6.954	10.764	4.098	0.229	0.196	0.158	1.315		98.284
	(j)	63.936	27.849	2958	Mountain Jourdanne	glass-EMPA data	30I-TVG2-1-GL1-8	52.026	15.772	8.1517	7.011	10.636	3.987	0.238	0.153	0.157	1.574		98.943
	(j)	63.936	27.849	2958	Mountain Jourdanne	glass-EMPA data	30I-TVG2-1-GL1-9	52.017	15.939	8.35619	6.851	10.674	3.969	0.235	0.093	0.18	1.382		98.909
	(j)	63.936	27.849	2958	Mountain Jourdanne	glass-EMPA data	30I-TVG2-1-GL1-10	51.813	16.076	8.46399	6.915	10.633	4.096	0.241	0.159	0.198	1.591		99.37
	(j)	63.936	27.849	2958	Mountain Jourdanne	glass-EMPA data	30I-TVG2-2-GL2-1	51.597	15.831	7.87387	6.87	10.553	3.974	0.249	0.173	0.182	1.219		97.747											2.0065	205.437	27.7815	122.051	4.10956				25.062	5.40687	16.1437	2.44656	12.2054	3.2737	1.19051	4.19761	0.753183	4.88088	0.963229	3.08469
	(j)	63.936	27.849	2958	Mountain Jourdanne	glass-EMPA data	30I-TVG2-2-GL2-2	51.05	15.827	7.80496	6.871	10.623	4.022	0.24	0.176	0.162	1.336		97.389											2.09156	208.873	28.0109	122.187	4.21629				24.3202	5.54383	16.3483	2.60149	12.0525	3.59702	1.35702	4.3738	0.709334	5.31912	1.02201	3.32147
	(j)	63.936	27.849	2958	Mountain Jourdanne	glass-EMPA data	30I-TVG2-2-GL2-3	51.89	15.721	8.34508	6.811	10.601	3.932	0.253	0.128	0.185	1.602		98.718											2.29767	206.298	27.8766	120.837	3.94105				24.6117	5.69978	16.1829	2.41308	11.3866	3.85432	1.49115	4.68495	0.858099	5.02677	1.05663	3.24235
	(j)	63.936	27.849	2958	Mountain Jourdanne	glass-EMPA data	30I-TVG2-2-GL2-4	52.058	15.845	8.37175	6.812	10.526	3.797	0.232	0.069	0.191	1.266		98.329											2.205	207.174	28.1836	126.739	3.96738				25.0313	5.41116	16.1084	2.41654	11.6485	3.47425	1.37149	4.11837	0.664671	5.22495	1.05489	3.36346
	(j)	63.936	27.849	2958	Mountain Jourdanne	glass-EMPA data	30I-TVG2-2-GL2-5	51.841	15.795	8.21283	6.861	10.527	4.007	0.252	0.231	0.151	1.285		98.354											2.02187	207.626	28.0619	122.11	4.02773				25.1496	5.46808	15.9707	2.44298	11.4348	3.53	1.25659	4.2228	0.728944	4.98337	1.0014	3.32976
	(j)	63.923	27.851	2743	Mountain Jourdanne	whole rock-XRF	49I-TVG01	51.17	17.72	7.76	7.34	10.97	3.86	0.2	0.13	0.14	1.14	-0.41	100			32.8	181	263	33.2	93.4	65.8	68.5		1.77	232	23.4	101	3				22.1	4.41	17.8	1.97	9.43	2.65	1.11	3.33	0.63	4.19	0.86	2.47
	(j)	63.923	27.851	2743	Mountain Jourdanne	whole rock-XRF	49I-TVG01duplicate	51.06	17.76	7.76	7.28	10.94	3.92	0.2	0.13	0.14	1.13	-0.35	99.96
	(j)	63.923	27.851	2759	Mountain Jourdanne	whole rock-XRF	20VII-TVG19-1	51.04	17.52	7.77	7.23	10.88	3.86	0.23	0.13	0.14	1.17	-0.22	99.75
	(j)	63.935	27.842		Mountain Jourdanne	whole rock-XRF	26VI-TVG02-1	51.51	15.49	9.54	6.44	10.63	4.47	0.26	0.17	0.19	1.58	-0.4	99.88			42.5	236	207	33.2	43.7	82.5	68.7		2.16	195	33.5	141	4.52				26.9	6.34	17.5	2.56	12.5	4	1.36	5.13	0.81	5.45	1.17	3.48
	(j)	63.935	27.849	2936	Mountain Jourdanne	whole rock-XRF	26VI-TVG03-1	51.42	15.36	9.86	6.43	10.44	4.39	0.28	0.17	0.2	1.6	-0.6	99.56			43.3	244	174	34.6	41.3	82.8	70.6		2.47	195	35.1	145	4.72				27	6.49	18	2.59	13.3	4.07	1.42	5.02	0.91	5.93	1.19	3.6
	(j)	63.935	27.849	2936	Mountain Jourdanne	whole rock-XRF	26VI-TVG03-1-2	51.66	15.45	9.8	6.41	10.49	4.44	0.29	0.17	0.2	1.63	-0.4	100.14			43.4	240	174	34.2	42	85	72.9		2.64	201	35.5	149	4.91				26.5	6.56	18.2	2.68	13.3	4.1	1.43	5.28	0.91	5.9	1.19	3.61
	(j)	63.94	27.85		Mountain Jourdanne	whole rock-XRF	19III-TVG3-1	51.45	15.28	9.96	6.42	10.41	4.34	0.27	0.18	0.2	1.62	-0.39	99.74			43.3	240	152	35.1	41.2	88.3	124		2.36	186	35.4	144	4.75				26.1	6.21	17.7	2.76	12.7	4.02	1.45	5.16	0.92	6.01	1.28	3.63
	(j)	63.936	27.849	2958	Mountain Jourdanne	whole rock-XRF	30I-TVG2-1	51.16	20.81	5.81	5.09	11.58	3.95	0.18	0.12	0.11	0.87	-0.04	99.64			26.3	147	223	132	58.4	60.5	42.7		1.42	271	18.7	79.4	3.41				17.9	3.6	10.2	1.56	7.66	2.29	0.9	2.72	0.5	3.34	0.68	1.9
	(j)	63.936	27.849	2958	Mountain Jourdanne	whole rock-XRF	30I-TVG2-2	51.48	21.89	5.22	4.54	11.89	3.88	0.17	0.09	0.1	0.79	-0.1	99.94			22.1	125	205	104	48.8	44.9	35.3		1.15	283	15.7	66.7	2.7				16	3.28	8.85	1.35	6.62	1.87	0.84	2.22	0.43	2.81	0.59	1.7
	(e)	63.94	27.85	2951	Mountain Jourdanne	glass-XRF	SW-7	50.59	15.1	11.12	6.4	10.22	4.02	0.3	0.17	0.18	1.61		99.7																				6.11	16.7	2.76	13.2	3.94	1.4	5.02	0.925	5.97	1.32	3.61
	(k)	63.94	27.85	2985	Mountain Jourdanne	whole rock-XRF	DY0115-017-005A	51.15	15.05	10.12	6.36	10.73	3.87	0.31	0.17	0.15	1.63																						6.16	17.7	2.84	13.7	4.01	1.42	5	0.886	5.86	1.2	3.37
	(k)	63.94	27.85	2951	Mountain Jourdanne	glass-XRF	DY0115-019-007	50.59	15.1	11.12	6.4	10.22	4.02	0.3	0.17	0.18	1.61																						6.11	16.7	2.76	13.2	3.94	1.4	5.02	0.925	5.97	1.32	3.61
	(k)	63.935	27.85		Mountain Jourdanne	whole rock-XRF	DY0125-26I-TVG2-001	51.51	15.49	9.54	6.44	10.63	4.47	0.26	0.17	0.19	1.58					42.5	236	207		43.7				2.16	195	33.5	141	4.52				26.9	6.34	17.5	2.56	12.5	4	1.36	5.13	0.81	5.45	1.17	3.48
	(k)	63.923	27.85	2743	Mountain Jourdanne	whole rock-XRF	DY0135-49I-TVG1	51.17	17.76	7.76	7.34	10.97	3.92	0.2	0.13	0.14	1.14					32.8	181	263		93.4				1.77	232	23.4	101	3				22.1	4.41	17.8	1.97	9.43	2.65	1.11	3.33	0.63	4.19	0.86	2.47
	(k)	63.923	27.85	2759	Mountain Jourdanne	whole rock-XRF	DY0115-20VII-TVG19-001	51.04	17.52	7.77	7.23	10.88	3.86	0.23	0.13	0.14	1.17
	(k)	63.935	27.85	2936	Mountain Jourdanne	whole rock-XRF	DY0125-26I-TVG3-001	51.42	15.36	9.86	6.43	10.44	4.39	0.28	0.17	0.2	1.6					43.3	244	174		41.3				2.47	195	35.1	145	4.72				27	6.49	18	2.59	13.3	4.07	1.42	5.02	0.91	5.93	1.19	3.6
	(k)	63.935	27.85	2936	Mountain Jourdanne	whole rock-XRF	DY0125-26I-TVG3-001-002	51.66	15.45	9.8	6.41	10.49	4.44	0.29	0.17	0.2	1.63					43.4	240	174		42				2.64	201	35.5	149	4.91				26.5	6.56	18.2	2.68	13.3	4.1	1.43	5.28	0.91	5.9	1.19	3.61
	(k)	63.94	27.85		Mountain Jourdanne	whole rock-XRF	DY0115-19III-TVG3-001	51.45	15.28	9.96	6.42	10.41	4.34	0.27	0.18	0.2	1.62					43.3	240	152		41.2				2.36	186	35.4	144	4.75				26.1	6.21	17.7	2.76	12.7	4.02	1.45	5.16	0.92	6.01	1.28	3.63
	(k)	63.91	27.85	2800	Mountain Jourdanne	glass-EMPA data	DUF0107-016	51.44	16.93	8.20171	7.91	10.64	3.95	0.19	0.15	0.15	1.24														207	28.4	113	3.7				17.8	5.4	15.7	2.4	11.4	3.3	0.9	3.6	0.6	4.7	0.9	3.1
	(k)	63.91	27.85	2800	Mountain Jourdanne	whole rock-EMPA data	DUF0107-016	50.92	16.79	8.31285	7.92	10.82	4	0.2	0.15	0.16	1.25						213	334.5		99.4				1.84	222.99	25.4	109.46	2.9				20.5	4.79	14.29	2.2	11.59	3.21	1.11	3.36	0.64	4.1	0.9	2.48
	(k)	63.91	27.85	2800	Mountain Jourdanne	whole rock-EMPA data	DUF0107-016-001-001	50.95	17.01	8.75738	7.79	11.35	3.63	0.12	0.12	0.13	1.15					38.6	228.9	357.7		105.1				1.84	221.13	32.44	98.69	3.21				20.1	4.72	13.83	2.03	10.23	2.98	1.14	4.05	0.73	4.59	0.97	2.8
	(k)	63.91	27.85	2800	Mountain Jourdanne	glass-EMPA data	DUF0107-016-002-001	51.88	16.78	1.3	7.54	10.64	4.03	0.24	0.14	0.22	1.38
	(k)	63.91	27.85	2800	Mountain Jourdanne	whole rock-EMPA data	DUF0107-016-002-001	51.28	17.01	8.83518	7.37	10.9	3.86	0.19	0.15	0.14	1.29						300.6	298		111.3				1.14	145.85	35.78	126.38	3.54				13.43	4.71	13.86	2.27	11.97	3.86	1.48	5.18	0.86	6.01	1.24	3.41
	(k)	63.91	27.85	2800	Mountain Jourdanne	whole rock-EMPA data	DUF0107-016-002-003	51.34	17.04	8.90186	7.51	10.94	3.77	0.19	0.11	0.14	1.25
	(k)	63.91	27.85	2800	Mountain Jourdanne	whole rock-EMPA data	DUF0107-016-003-001	51.34	17.13	8.7685	7.46	10.87	3.81	0.19	0.08	0.16	1.32					36.6	236.2	317.7		103.3				2.39	213.34	30.56	113.41	3.99				23.07	5.55	16.4	2.33	11.5	3.27	1.19	4.36	0.76	4.82	1.03	2.96
	(k)	63.87	27.85	4870	Mountain Jourdanne	whole rock-EMPA data	DUF0107-017	51.34	16.94	8.11281	7.84	11.13	3.79	0.47	0.14	0.13	1.2
	(k)	63.75	27.85	4475	Mountain Jourdanne	whole rock-EMPA data	DUF0107-019-001-002	50.97	16.97	8.22394	7.73	10.75	3.97	0.25	0.15	0.18	1.29
	(k)	63.75	27.85	4475	Mountain Jourdanne	glass-EMPA data	DUF0107-019-001-003	51.57	17.06	1.21	7.63	10.68	3.92	0.26	0.14	0.21	1.33					32.8	211	321		115.6				4.24	237	26.16	120	3.7				27.5	5.1	14.46	2.34	11.58	3.04	1.21	4.15	0.68	4.26	0.98	2.81
	(k)	63.75	27.85	4475	Mountain Jourdanne	whole rock-EMPA data	DUF0107-019-001-003	51.57	17.08	8.22394	7.78	10.8	4	0.26	0.14	0.21	1.33						194	296		103				2.31	226	23.9	112	3.7				24.8	5.25	14.42	2.08	10.5	2.91	1.12	3.73	0.67	4.07	0.85	2.36
	(k)	63.75	27.85	4475	Mountain Jourdanne	whole rock-EMPA data	DUF0107-019-001-005	51.12	16.96	8.25728	7.64	10.62	4.01	0.26	0.14	0.18	1.28
	(k)	63.75	27.85	4475	Mountain Jourdanne	whole rock-EMPA data	DUF0107-019-001-007	51.16	17.03	8.14615	7.67	10.59	4.01	0.25	0.15	0.16	1.27
	(k)	63.36	27.85	4950	Mountain Jourdanne	glass-EMPA data	DUF0107-022-001-001	49.2	17.84	0.94	8.24	10.3	3.26	0.1	0.19	0.1	0.9
	(k)	63.36	27.85	4950	Mountain Jourdanne	whole rock-EMPA data	DUF0107-022-001-001	48.67	18.22	10.7689	8.44	10.3	3.39	0.12	0.14	0.14	0.95
	(k)	63.36	27.85	4950	Mountain Jourdanne	whole rock-EMPA data	DUF0107-022-001-002	48.74	17.69	11.5469	8.23	10.28	3.48	0.12	0.17	0.13	0.98
	(k)	63.36	27.85	4950	Mountain Jourdanne	whole rock-EMPA data	DUF0107-022-001-003	48.65	18.25	11.2357	7.7	10.49	3.46	0.1	0.19	0.1	1
	(k)	63.36	27.85	4950	Mountain Jourdanne	whole rock-EMPA data	DUF0107-022-002-001	49	17.77	11.0023	8.31	10.44	3.25	0.11	0.19	0.09	0.95					39.4	157.1	286.2		144.8				0.84	116.26	27.69	55.5	1.58				7.88	2.22	6.84	1.05	5.55	1.92	0.82	3.14	0.64	4.59	1.05	3.19
	(k)	63.36	27.85	4950	Mountain Jourdanne	whole rock-EMPA data	DUF0107-022-002-002	51.31	16.43	9.79093	6.8	8.65	4.78	0.32	0.14	0.23	1.81
	(k)	63.94	27.85	2951	Mountain Jourdanne	whole rock-EMPA data	DY0115-017-006	50.9	15.2	11.1	6.4	10.3	4.06	0.28	0.17	0.18	1.62							165		43							143
	(k)	63.94	27.85	2951	Mountain Jourdanne	whole rock-EMPA data	DY0115-017-007	50.6	15.1	11.1	6.4	10.2	4.02	0.3	0.17	0.18	1.61							177		45							143
	(k)	63.94	27.85	2951	Mountain Jourdanne	whole rock-EMPA data	DY0115-017-010	50.8	15	11.9	5.98	9.86	4.19	0.32	0.19	0.2	1.78							82		36							156
	(k)	63.94	27.85	2951	Mountain Jourdanne	whole rock-EMPA data	DY0115-017-011	51	15	11.6	6.01	9.91	4.25	0.31	0.18	0.2	1.78							78		33							157
	(k)	63.94	27.85	2951	Mountain Jourdanne	whole rock-EMPA data	DY0115-017-012	50.6	14.9	12	6	9.88	4.2	0.31	0.18	0.2	1.78							90		36							163
	(k)	63.938	27.845	3030	Mountain Jourdanne	LA-ICPMS	SHK0446-001	50.6	16	11.0023	6.16	10.6	4.74	0.28	0.19	0.23	1.8					47.8	250	79		27.9				2.56	200	39.6	165	5.2				28.3	7.1	19.4	3.1	14.6	4.5	1.6	5.7	1	6.7	1.4	4.4
	(a) Yu X, Dick HJB (2020) Plate-driven micro-hotspots and the evolution of the Dragon Flag melting anomaly, Southwest Indian Ridge. Earth Planet Sci Lett 531:116002
	(b) Yang AY, Zhou MF, Zhao TP, Deng XG, Qi L, Xu J F (2014) Chalcophile elemental compositions of morbs from the ultraslow-spreading southwest indian ridge and controls of lithospheric structure on s-saturated differentiation. Chem Geol 382: 1-13
	(c) Yu M, Su X, Tao CH (2013) Petrological and Geochemical Features of Basalts at 49. 6°E and 50. 5°E Hydrothermal Fields along the Southwest Indian Ridge. Geoscience 27: 497–508 (in Chinese)
	(d) Yang AY, Zhao T-P, Zhou M-F, Deng X-G (2017) Isotopically enriched N-MORB: A new geochemical signature of off-axis plume-ridge interaction-A case study at 50°28′E, Southwest Indian Ridge. J Geophys Res: Solid Earth 122(1):191-213
	(e) Yang AY, Zhao T, Zhou M, Deng X, Wang G, Li J (2013) Os isotopic compositions of MORBs from the ultra-slow spreading Southwest Indian Ridge: Constraints on the assimilation and fractional crystallization (AFC) processes. Lithos 179: 28–35
	(f) Le Voyer M, Hauri EH, Cottrell E, Kelley KA, Salters VJM, Langmuir CH, Hilton DR, Barry PH, Füri E (2019) Carbon Fluxes and Primary Magma CO2 Contents Along the Global Mid-Ocean Ridge System. Geochem Geophys Geosyst 20(3):1387-1424
	(g) Ou Q, Nichols ARL, Carvalho BB, Zi F, Wang K, Li J, Zhang L. Liu JY (2021) The role of axial discontinuities in oceanic crustal evolution: Evidence from elemental and Mo-Sr-Nd-Pb-Hf isotopic compositions of rock suites from the Southwest Indian Ridge (42°–53°E). Mar Geol 442: 106626
	(h) Dong Z, Tao C, Liang J, Liao S, Li W, Zhang G, Cao Z (2021) Geochemistry of Basalts from Southwest Indian Ridge 64◦ E: Implications for the Mantle Heterogeneity East of the Melville Transform. Minerals 11: 175
	(i) Paquet M, Cannat M, Brunelli D, Hamelin C, Humler E (2016) Effect of melt/mantle interactions on MORB chemistry at the easternmost Southwest Indian Ridge (61°–67°E). Geochem Geophys Geosyst 17(11):4605-4640
	(j) Li W, Tao C, Zhang W, Liu J, Liang J, Liao S, Yang W (2019) Melt Inclusions in Plagioclase Macrocrysts at Mountain Jourdanne, Southwest Indian Ridge (~64° E): Implications for an Enriched Mantle Source and Shallow Magmatic Processes. Minerals 9: 493
	(k) Data extracted from the EarthChem library (http://www.earthchem.org/library/search)
[truncated: 40 more columns]
