# Supplementary material for: Magmatic processes within the plumbing system of the ultraslow-spreading southwest Indian ridge: constraints from olivine, plagioclase and melt inclusions
Source: Springer Nature journal article supplement (doi:10.1007/s00410-024-02098-0), 2024-02-22
Supplement: MOESM3 [file 410_2024_2098_MOESM3_ESM.xls]

## Sheet: Table S2
	Supplemental Table S2. Major element compositions of olivine crystals of MORBS from SWIR
		Data Source	longitude（°E）	latitude（°S）	Deepth (m)	Zone	Sample	Spot	No.	Na2O	Al2O3	MgO	SiO2	K2O	TiO2	CaO	NiO	P2O5	FeO	MnO	Cr2O3	Total	Fo	Fa	Mn	KD(Fe-Mg) Ol-liquid	host glass Mg#	Kd-calculation	Note
	Olivine in the thin section	This study	63.9358	27.849	2958	Mountain Jourdanne	30I-TVG02-1	30I-2-1-24	257	0.008	0.039	46.67	40.166	0.017	0	0.322	0.132	0	13.224	0.153	0.084	100.815	86.1459	13.6936	0.160459	0.268929	62.578	0.268929
	Olivine in the thin section	This study	63.9358	27.849	2958	Mountain Jourdanne	30I-TVG02-1	30I-2-1-25	258	0	0.033	46.73	40.128	0.031	0	0.279	0.153	0	13.367	0.237	0.015	100.973	85.9585	13.7938	0.247695	0.273162	62.578	0.273162
	Olivine in the thin section	This study	63.9358	27.849	2958	Mountain Jourdanne	30I-TVG02-1	30I-2-1-26	260	0.025	0.022	46.854	39.791	0.019	0.03	0.305	0.169	0	13.142	0.239	0.061	100.657	86.1883	13.5619	0.24979	0.267975	62.578	0.267975
	Olivine in the thin section	This study	63.9358	27.849	2958	Mountain Jourdanne	30I-TVG02-1	30I-2-1-27	261	0.041	0.024	46.652	39.584	0	0	0.291	0.1	0	13.112	0.203	0.021	100.028	86.1961	13.5908	0.213103	0.267798	62.578	0.267798
	Olivine mounted in epoxy resin disks	This study	63.9358	27.849	2958	Mountain Jourdanne	30IV-TVG04	DY30IV-1OL	66	0	0.041	46.735	39.832	0	0.01	0.329		0	11.766	0.189	0.055	98.957	87.4483	12.3508	0.20093	0.176487	55.1487	0.176487	disequilibrium with host
	Olivine mounted in epoxy resin disks	This study	63.9358	27.849	2958	Mountain Jourdanne	30I-TVG02-1	30I-2-1-2MI	67	0	0.03	46.139	39.851	0.004	0	0.271		0	12.82	0.199	0.041	99.355	86.3315	13.457	0.211558	0.264757	62.578	0.264757	disequilibrium with host
	Olivine mounted in epoxy resin disks	This study	63.9358	27.849	2958	Mountain Jourdanne	30I-TVG02-1	30I-2-1-2OL	68	0.004	0.044	45.992	39.778	0.012	0.015	0.316		0.043	12.655	0.246	0.054	99.159	86.4006	13.3369	0.26257	0.263208	62.578	0.263208	disequilibrium with host
	Olivine mounted in epoxy resin disks	This study	63.9358	27.849	2958	Mountain Jourdanne	30I-TVG02-1	30I-2-1-3OL	70	0.004	0.051	45.445	39.51	0.006	0	0.307		0	12.661	0.198	0.036	98.218	86.2985	13.4879	0.213628	0.265497	62.578	0.265497
	Olivine mounted in epoxy resin disks	This study	63.9358	27.849	2958	Mountain Jourdanne	30I-TVG02-1	30I-2-1-6OL	72	0.019	0.03	45.553	39.508	0	0	0.282		0.013	13.124	0.274	0.039	98.842	85.8338	13.8728	0.293337	0.275987	62.578	0.275987
	Olivine mounted in epoxy resin disks	This study	63.9358	27.849	2958	Mountain Jourdanne	30I-TVG02-1	30I-2-1-8OL	74	0.006	0.041	45.949	39.7	0.002	0	0.299		0	12.735	0.193	0.021	98.946	86.3656	13.4283	0.206109	0.263992	62.578	0.263992	disequilibrium with host
	Olivine mounted in epoxy resin disks	This study	63.9358	27.849	2958	Mountain Jourdanne	30I-TVG02-1	30I-2-1-9OL	76	0	0.026	45.548	39.576	0	0	0.304		0.074	12.777	0.177	0.017	98.499	86.2384	13.5712	0.190406	0.266847	62.578	0.266847
	Olivine mounted in epoxy resin disks	This study	63.9358	27.849	2958	Mountain Jourdanne	30I-TVG02-1	30I-2-1-10OL	78	0	0.052	44.892	39.222	0	0.002	0.308		0.112	13.784	0.247	0.004	98.623	85.079	14.655	0.265966	0.293272	62.578	0.293272
	Olivine mounted in epoxy resin disks	This study	63.9358	27.849	2958	Mountain Jourdanne	30I-TVG02-1	30I-2-1-11-1MI	79	0	0.019	45.337	39.279	0.002	0	0.332		0.026	13.157	0.223	0.038	98.413	85.7929	13.9673	0.239761	0.276916	62.578	0.276916
	Olivine mounted in epoxy resin disks	This study	63.9358	27.849	2958	Mountain Jourdanne	30I-TVG02-1	30I-2-1-11-OL	81	0.006	0.04	44.967	39.175	0	0	0.308		0	13.275	0.187	0.068	98.026	85.6181	14.1796	0.202297	0.280896	62.578	0.280896
	Olivine mounted in epoxy resin disks	This study	63.9358	27.849	2958	Mountain Jourdanne	30I-TVG02-1	30I-2-1-12OL	84	0	0.043	45.561	39.52	0	0	0.316		0	12.919	0.233	0.102	98.694	86.0602	13.6898	0.250058	0.270863	62.578	0.270863
	Olivine mounted in epoxy resin disks	This study	63.9358	27.849	2958	Mountain Jourdanne	30I-TVG02-1	30I-2-1-13OL	86	0	0.052	45.72	39.55	0	0.048	0.305		0.009	12.977	0.168	0.05	98.879	86.1091	13.7112	0.179774	0.26976	62.578	0.26976
	Olivine mounted in epoxy resin disks	This study	63.9358	27.849	2958	Mountain Jourdanne	30I-TVG02-1	30I-2-1-14OL	90	0.004	0.039	45.65	39.393	0.012	0	0.29		0	12.674	0.224	0.025	98.311	86.3156	13.4437	0.240642	0.265113	62.578	0.265113
	Olivine mounted in epoxy resin disks	This study	63.9358	27.849	2958	Mountain Jourdanne	30I-TVG02-1	30I-2-1-15OL	92	0.017	0.046	45.396	39.43	0	0.02	0.289		0	12.897	0.19	0.037	98.322	86.0766	13.7187	0.20469	0.270493	62.578	0.270493
	Olivine mounted in epoxy resin disks	This study	63.9358	27.849	2958	Mountain Jourdanne	30I-TVG02-1	30I-2-1-16MI	93	0	0.054	45.317	39.558	0	0.008	0.361		0	12.844	0.228	0.038	98.408	86.069	13.685	0.246034	0.270664	62.578	0.270664
	Olivine mounted in epoxy resin disks	This study	63.9358	27.849	2958	Mountain Jourdanne	30I-TVG02-1	30I-2-1-16OL	94	0.004	0.039	45.88	39.783	0	0.03	0.334		0.035	13.029	0.219	0.044	99.397	86.0568	13.7098	0.233389	0.270939	62.578	0.270939
	Olivine mounted in epoxy resin disks	This study	63.9358	27.849	2958	Mountain Jourdanne	30I-TVG02-1	30I-2-1-17MI	95	0.028	0.028	45.438	39.742	0	0.065	0.298		0	12.91	0.224	0.021	98.754	86.0443	13.7147	0.241005	0.271222	62.578	0.271222
	Olivine mounted in epoxy resin disks	This study	63.9358	27.849	2958	Mountain Jourdanne	30I-TVG02-1	30I-2-1-17OL	96	0.001	0.037	45.567	39.386	0	0.02	0.358		0.026	13.043	0.199	0.049	98.686	85.9802	13.8065	0.213342	0.272671	62.578	0.272671
	Olivine mounted in epoxy resin disks	This study	63.9358	27.849	2958	Mountain Jourdanne	30I-TVG02-1	30I-2-1-18OL	98	0.001	0.044	45.284	39.187	0.002	0.035	0.324		0	13.006	0.19	0.029	98.102	85.9471	13.848	0.204887	0.27342	62.578	0.27342
	Olivine mounted in epoxy resin disks	This study	63.9358	27.849	2958	Mountain Jourdanne	30I-TVG02-1	30I-2-1-18SP	99	0	0.046	45.31	39.652	0	0	0.295		0.026	13.28	0.248	0.012	98.869	85.6507	14.0829	0.266357	0.280152	62.578	0.280152
	Olivine mounted in epoxy resin disks	This study	63.9358	27.849	2958	Mountain Jourdanne	30I-TVG02-1	30I-2-1-19OL	101	0	0.04	45.895	39.594	0	0.014	0.283		0.017	12.918	0.212	0.054	99.027	86.1678	13.6061	0.226147	0.268437	62.578	0.268437
	Olivine mounted in epoxy resin disks	This study	63.9358	27.849	2958	Mountain Jourdanne	30I-TVG02-1	30I-2-1-20OL	103	0.005	0.026	45.52	39.429	0.007	0	0.245		0.056	12.706	0.252	0.055	98.301	86.2266	13.5022	0.271215	0.267114	62.578	0.267114
	Olivine mounted in epoxy resin disks	This study	63.9358	27.849	2958	Mountain Jourdanne	30I-TVG02-1	30I-2-1-21OL	105	0.032	0.062	45.856	39.569	0	0.006	0.31		0.013	12.923	0.259	0.036	99.066	86.1099	13.6138	0.276332	0.269741	62.578	0.269741
	Olivine mounted in epoxy resin disks	This study	63.9358	27.849	2958	Mountain Jourdanne	30I-TVG02-1	30I-2-1-22OL	107	0	0.023	45.731	39.049	0.023	0.018	0.337		0.026	13.048	0.229	0.009	98.493	85.9913	13.764	0.244655	0.272419	62.578	0.272419
	Olivine mounted in epoxy resin disks	This study	63.9358	27.849	2958	Mountain Jourdanne	30I-TVG02-1	30I-2-1-23OL	109	0.01	0.038	45.37	39.433	0	0.007	0.295		0.009	12.953	0.229	0.016	98.36	85.9823	13.7711	0.246576	0.272622	62.578	0.272622
	Olivine mounted in epoxy resin disks	This study	63.9358	27.849	2958	Mountain Jourdanne	30I-TVG02-1	30I-2-1-24OL	111	0.001	0.036	45.406	39.519	0.011	0.037	0.298		0.022	12.925	0.238	0.06	98.553	86.0091	13.7347	0.256144	0.272016	62.578	0.272016
	Olivine in the thin section	(a)	51.56	37.43	1900-2700	Segment 27	20VII-L12 (Wb-16-a)	wb-16-a-1-1				47.18	41.41			0.28	0.28		10.32	0.15		99.62	89.07				64.5675	0.223614	disequilibrium with host
	Olivine in the thin section	(a)	51.56	37.43	1900-2700	Segment 27	20VII-L12 (Wb-16-a)	wb-16-a-1-2				48.04	41.29			0.29	0.3		9.84	0.15		99.9	89.69				64.5675	0.209472	disequilibrium with host
	Olivine in the thin section	(a)	51.56	37.43	1900-2700	Segment 27	20VII-L12 (Wb-16-a)	wb-16-a-1-3				47.13	40.14			0.34	0.17		11.21	0.16		99.14	88.23				64.5675	0.243092	disequilibrium with host
	Olivine in the thin section	(a)	51.56	37.43	1900-2700	Segment 27	20VII-L12 (Wb-16-a)	wb-16-a-1-4				47.61	41.08			0.26	0.31		10.6	0.15		100.01	88.89				64.5675	0.227757	disequilibrium with host
	Olivine in the thin section	(a)	51.56	37.43	1900-2700	Segment 27	20VII-L12 (Wb-16-a)	wb-16-a-1-5				46.69	40.69			0.25	0.29		11.74	0.16		99.83	87.64				64.5675	0.256997	disequilibrium with host
	Olivine in the thin section	(a)	51.56	37.43	1900-2700	Segment 27	20VII-L12 (Wb-16-a)	wb-16-a-1-6				46.89	40.66			0.3	0.27		11.03	0.15		99.32	88.34				64.5675	0.240521	disequilibrium with host
	Olivine in the thin section	(a)	51.56	37.43	1900-2700	Segment 27	20VII-L12 (Wb-16-a)	wb-16-a-1-7				47.1	40.95			0.26	0.29		10.75	0.15		99.51	88.65				64.5675	0.233307	disequilibrium with host
	Olivine in the thin section	(a)	51.56	37.43	1900-2700	Segment 27	20VII-L12 (Wb-16-a)	wb-16-a-1-8A				48.11	39.73			0.33	0.16		11.06	0.16		99.54	88.58				64.5675	0.234932	disequilibrium with host
	Olivine in the thin section	(a)	51.56	37.43	1900-2700	Segment 27	20VII-L12 (Wb-16-a)	wb-16-a-1-8B				47.46	41.05			0.31	0.17		10.88	0.16		100.03	88.61				64.5675	0.234235	disequilibrium with host
	Olivine in the thin section	(a)	51.56	37.43	1900-2700	Segment 27	20VII-L12 (Wb-16-a)	wb-16-a-1-9				46.88	41.16			0.25	0.31		11.21	0.16		99.97	88.17				64.5675	0.244498	disequilibrium with host
	Olivine in the thin section	(a)	51.56	37.43	1900-2700	Segment 27	20VII-L12 (Wb-16-a)	wb-16-a-1-10A				47.62	40.81			0.3	0.17		10.64	0.16		99.7	88.86				64.5675	0.228449	disequilibrium with host
	Olivine in the thin section	(a)	51.56	37.43	1900-2700	Segment 27	20VII-L12 (Wb-16-a)	wb-16-a-1-10B				48.11	40.6			0.33	0.16		10.7	0.16		100.05	88.91				64.5675	0.227296	disequilibrium with host
	Olivine in the thin section	(a)	51.56	37.43	1900-2700	Segment 27	20VII-L12 (Wb-16-a)	wb-16-a-1-11A				45.76	40.57			0.33	0.16		12.97	0.19		99.97	86.28				64.5675	0.289771
	Olivine in the thin section	(a)	51.56	37.43	1900-2700	Segment 27	20VII-L12 (Wb-16-a)	wb-16-a-1-11B				45.43	40.39			0.32	0.15		13.04	0.19		99.53	86.13				64.5675	0.293449
	Olivine in the thin section	(a)	51.56	37.43	1900-2700	Segment 27	20VII-L12 (Wb-16-a)	wb-16-a-1-12				48.52	39.71			0.26	0.3		10.9	0.16		99.84	88.81				64.5675	0.229604	disequilibrium with host
	Olivine in the thin section	(a)	51.56	37.43	1900-2700	Segment 27	20VII-L12 (Wb-16-a)	wb-16-a-1-13				47.15	39.7			0.26	0.3		11.35	0.17		98.93	88.1				64.5675	0.24614	disequilibrium with host
	Olivine in the thin section	(a)	51.56	37.43	1900-2700	Segment 27	20VII-L12 (Wb-16-a)	wb-16-a-1-14				47.36	41.19			0.28	0.28		10.24	0.15		99.5	89.18				64.5675	0.221091	disequilibrium with host
	Olivine in the thin section	(a)	51.56	37.43	1900-2700	Segment 27	20VII-L12 (Wb-16-a)	wb-16-a-1-15A				46.17	40.49			0.3	0.15		12.73	0.17		100.02	86.6				64.5675	0.281967
	Olivine in the thin section	(a)	51.56	37.43	1900-2700	Segment 27	20VII-L12 (Wb-16-a)	wb-16-a-1-15B				45.67	40.36			0.3	0.15		12.8	0.18		99.46	86.41				64.5675	0.286594
	Olivine in the thin section	(a)	51.56	37.43	1900-2700	Segment 27	20VII-L12 (Wb-16-a)	wb-16-a-1-16				44.91	40.91			0.3	0.16		13.34	0.19		99.8	85.71				64.5675	0.303817
	Olivine in the thin section	(a)	51.56	37.43	1900-2700	Segment 27	20VII-L12 (Wb-16-a)	wb-16-a-1-17				47.23	41.03			0.34	0.17		10.99	0.15		99.92	88.45				64.5675	0.237955	disequilibrium with host
	Olivine in the thin section	(a)	51.56	37.43	1900-2700	Segment 27	20VII-L12 (Wb-16-a)	wb-16-a-1-18				46.55	41.06			0.26	0.31		11.01	0.15		99.33	88.29				64.5675	0.241689	disequilibrium with host
	Olivine in the thin section	(a)	51.56	37.43	1900-2700	Segment 27	20VII-L12 (Wb-16-a)	wb-16-a-1-19				48.03	41.13			0.28	0.27		10.15	0.14		100.01	89.4				64.5675	0.216063	disequilibrium with host
	Olivine in the thin section	(a)	51.56	37.43	1900-2700	Segment 27	20VII-L12 (Wb-16-a)	wb-16-a-1-20				46.45	40.77			0.27	0.18		11.52	0.14		99.33	87.79				64.5675	0.253444	disequilibrium with host
	Olivine in the thin section	(a)	51.56	37.43	1900-2700	Segment 27	20VII-L12 (Wb-16-a)	wb-16-a-1-21				47.56	41.01			0.33	0.16		10.83	0.15		100.04	88.67				64.5675	0.232844	disequilibrium with host
	Olivine in the thin section	(a)	51.56	37.43	1900-2700	Segment 27	20VII-L12 (Wb-16-a)	wb-16-a-1-22				47.82	40.61			0.34	0.16		10.94	0.15		100.01	88.63				64.5675	0.233771	disequilibrium with host
	Olivine in the thin section	(a)	51.56	37.43	1900-2700	Segment 27	20VII-L12 (Wb-16-a)	wb-16-a-1-23A				47.4	41.12			0.27	0.3		10.72	0.14		99.94	88.74				64.5675	0.231223	disequilibrium with host
	Olivine in the thin section	(a)	51.56	37.43	1900-2700	Segment 27	20VII-L12 (Wb-16-a)	wb-16-a-1-23B				47	41.14			0.27	0.29		10.73	0.14		99.57	88.64				64.5675	0.233539	disequilibrium with host
	Olivine in the thin section	(a)	51.56	37.43	1900-2700	Segment 27	20VII-L12 (Wb-16-a)	wb-16-a-1-24				47.82	40.75			0.34	0.16		10.98	0.15		100.2	88.59				64.5675	0.2347	disequilibrium with host
	Olivine in the thin section	(a)	51.56	37.43	1900-2700	Segment 27	20VII-L12 (Wb-16-a)	wb-16-a-1-25				47.51	40.55			0.27	0.31		10.71	0.14		99.5	88.77				64.5675	0.230529	disequilibrium with host
	Olivine in the thin section	(a)	51.56	37.43	1900-2700	Segment 27	20VII-L12 (Wb-16-a)	wb-16-a-1-26				47.38	40.94			0.34	0.17		10.96	0.15		99.94	88.51				64.5675	0.236559	disequilibrium with host
	Olivine in the thin section	(a)	51.56	37.43	1900-2700	Segment 27	20VII-L12 (Wb-16-a)	wb-16-a-1-27				46.99	41.16			0.34	0.17		11.05	0.15		99.86	88.35				64.5675	0.240287	disequilibrium with host
	Olivine in the thin section	(a)	51.56	37.43	1900-2700	Segment 27	20VII-L12 (Wb-16-a)	wb-16-a-1-28				47.72	40.7			0.26	0.3		10.82	0.15		99.95	88.72				64.5675	0.231685	disequilibrium with host
	Olivine in the thin section	(a)	51.56	37.43	1900-2700	Segment 27	20VII-L12 (Wb-16-a)	wb-16-a-1-29				47.81	40.54			0.33	0.17		11.08	0.15		100.08	88.49				64.5675	0.237024	disequilibrium with host
	Olivine in the thin section	(a)	51.56	37.43	1900-2700	Segment 27	20VII-L12 (Wb-16-a)	wb-16-a-1-30				46.9	40.65			0.33	0.17		10.82	0.15		99.03	88.54				64.5675	0.235861	disequilibrium with host
	Olivine in the thin section	(a)	51.56	37.43	1900-2700	Segment 27	20VII-L12 (Wb-16-a)	wb-16-a-1-31				46.62	40.52			0.28	0.18		11.44	0.14		99.17	87.9				64.5675	0.250846	disequilibrium with host
	Olivine in the thin section	(a)	51.56	37.43	1900-2700	Segment 27	20VII-L12 (Wb-16-a)	wb-16-a-1-32A				46.75	40.93			0.34	0.18		11.44	0.15		99.79	87.93				64.5675	0.250139	disequilibrium with host
	Olivine in the thin section	(a)	51.56	37.43	1900-2700	Segment 27	20VII-L12 (Wb-16-a)	wb-16-a-1-32B				45.9	40.58			0.32	0.17		13.15	0.17		100.3	86.15				64.5675	0.292958
	Olivine in the thin section	(a)	51.56	37.43	1900-2700	Segment 27	20VII-L12 (Wb-16-a)	wb-16-a-1-33				46.95	41.24			0.34	0.16		10.92	0.15		99.76	88.46				64.5675	0.237722	disequilibrium with host
	Olivine in the thin section	(a)	51.56	37.43	1900-2700	Segment 27	20VII-L12 (Wb-16-a)	wb-16-a-1-34				47.29	41.11			0.27	0.31		10.74	0.14		99.86	88.7				64.5675	0.232149	disequilibrium with host
	Olivine in the thin section	(a)	51.56	37.43	1900-2700	Segment 27	20VII-L12 (Wb-16-a)	wb-16-a-1-35				47.28	40.83			0.34	0.17		11.12	0.15		99.88	88.35				64.5675	0.240287	disequilibrium with host
	Olivine in the thin section	(a)	51.56	37.43	1900-2700	Segment 27	20VII-L12 (Wb-16-a)	wb-16-a-1-36				47.29	41.21			0.31	0.17		10.97	0.15		100.1	88.49				64.5675	0.237024	disequilibrium with host
	Olivine in the thin section	(a)	51.56	37.43	1900-2700	Segment 27	20VII-L12 (Wb-16-a)	wb-16-a-1-37				47.03	40.93			0.32	0.17		10.91	0.15		99.5	88.49				64.5675	0.237024	disequilibrium with host
	Olivine in the thin section	(a)	51.56	37.43	1900-2700	Segment 27	20VII-L12 (Wb-16-a)	wb-16-a-1-38				47.28	41.61			0.25	0.3		10.69	0.14		100.26	88.75				64.5675	0.230991	disequilibrium with host
	Olivine in the thin section	(a)	51.56	37.43	1900-2700	Segment 27	20VII-L12 (Wb-16-a)	wb-16-a-1-39				48.45	40.86			0.32	0.29		10.01	0.14		100.07	89.61				64.5675	0.211286	disequilibrium with host
	Olivine in the thin section	(a)	51.56	37.43	1900-2700	Segment 27	20VII-L12 (Wb-16-a)	wb-16-a-1-40				47.15	41.21			0.25	0.31		10.67	0.14		99.72	88.74				64.5675	0.231223	disequilibrium with host
	Olivine in the thin section	(a)	51.56	37.43	1900-2700	Segment 27	20VII-L12 (Wb-16-a)	wb-16-a-1-41				47.33	41.37			0.31	0.28		10.07	0.14		99.51	89.34				64.5675	0.217432	disequilibrium with host
	Olivine in the thin section	(a)	51.56	37.43	1900-2700	Segment 27	20VII-L12 (Wb-16-a)	wb-16-a-1-42				47.2	41.15			0.34	0.17		11.1	0.15		100.11	88.34				64.5675	0.240521	disequilibrium with host
	Olivine in the thin section	(a)	51.56	37.43	1900-2700	Segment 27	20VII-L12 (Wb-16-a)	wb-16-a-1-43				46.33	41.23			0.25	0.3		11.78	0.16		100.04	87.52				64.5675	0.259847	disequilibrium with host
	Olivine in the thin section	(a)	51.56	37.43	1900-2700	Segment 27	20VII-L12 (Wb-16-a)	wb-16-a-1-44A				47.84	41.4			0.3	0.32		10.26	0.14		100.26	89.26				64.5675	0.21926	disequilibrium with host
	Olivine in the thin section	(a)	51.56	37.43	1900-2700	Segment 27	20VII-L12 (Wb-16-a)	wb-16-a-1-44B				48	41.15			0.28	0.33		10.08	0.14		99.97	89.46				64.5675	0.214696	disequilibrium with host
	Olivine in the thin section	(a)	51.56	37.43	1900-2700	Segment 27	20VII-L12 (Wb-16-a)	wb-16-a-1-45A				46.76	41.16			0.25	0.31		10.74	0.14		99.36	88.58				64.5675	0.234932	disequilibrium with host
	Olivine in the thin section	(a)	51.56	37.43	1900-2700	Segment 27	20VII-L12 (Wb-16-a)	wb-16-a-1-45B				46.74	41.13			0.27	0.31		10.86	0.14		99.47	88.47				64.5675	0.23749	disequilibrium with host
	Olivine in the thin section	(a)	51.56	37.43	1900-2700	Segment 27	20VII-L12 (Wb-16-a)	wb-16-a-1-46A				46.46	41.22			0.34	0.17		11.06	0.15		99.39	88.22				64.5675	0.243327	disequilibrium with host
	Olivine in the thin section	(a)	51.56	37.43	1900-2700	Segment 27	20VII-L12 (Wb-16-a)	wb-16-a-1-46B				47.37	41.07			0.34	0.17		11.1	0.15		100.2	88.39				64.5675	0.239354	disequilibrium with host
	Olivine in the thin section	(a)	51.56	37.43	1900-2700	Segment 27	20VII-L12 (Wb-16-a)	wb-16-a-1-47				47.21	40.97			0.26	0.31		10.96	0.15		99.86	88.48				64.5675	0.237257	disequilibrium with host
	Olivine in the thin section	(a)	51.56	37.43	1900-2700	Segment 27	20VII-L12 (Wb-16-a)	wb-16-a-1-48				45.4	40.78			0.31	0.14		13.17	0.17		99.97	86				64.5675	0.296648
	Olivine in the thin section	(a)	51.56	37.43	1900-2700	Segment 27	20VII-L12 (Wb-16-a)	wb-16-a-1-49				48.57	39.84			0.34	0.15		11.04	0.15		100.09	88.69				64.5675	0.23238	disequilibrium with host
	Olivine in the thin section	(a)	51.56	37.43	1900-2700	Segment 27	20VII-L12 (Wb-16-a)	wb-16-a-1-50				47.44	39.96			0.27	0.31		10.85	0.16		98.98	88.63				64.5675	0.233771	disequilibrium with host
	Olivine in the thin section	(a)	51.56	37.43	1900-2700	Segment 27	20VII-L12 (Wb-16-a)	wb-16-a-1-51				47.37	41.01			0.31	0.28		10.4	0.15		99.52	89.03				64.5675	0.224534	disequilibrium with host
	Olivine in the thin section	(a)	51.56	37.43	1900-2700	Segment 27	20VII-L12 (Wb-16-a)	wb-16-a-1-52				46.71	40.54			0.28	0.31		10.93	0.16		98.91	88.4				64.5675	0.239121	disequilibrium with host
	Olivine in the thin section	(a)	51.56	37.43	1900-2700	Segment 27	20VII-L12 (Wb-16-a)	wb-16-a-1-53				47.44	40.94			0.32	0.28		10.17	0.15		99.29	89.26				64.5675	0.21926	disequilibrium with host
	Olivine in the thin section	(a)	51.56	37.43	1900-2700	Segment 27	20VII-L12 (Wb-16-a)	wb-16-a-1-54				45.94	39.72			0.31	0.16		13.12	0.2		99.44	86.19				64.5675	0.291977
	Olivine in the thin section	(a)	51.56	37.43	1900-2700	Segment 27	20VII-L12 (Wb-16-a)	wb-16-a-1-55				43.04	40.09			0.32	0.11		15.69	0.23		99.47	83.02				64.5675	0.372706	disequilibrium with host
	Olivine in the thin section	(a)	51.56	37.43	1900-2700	Segment 27	20VII-L12 (Wb-16-a)	wb-16-a-1-56				48.62	39.88			0.28	0.3		10.75	0.16		99.98	88.96				64.5675	0.226144	disequilibrium with host
	Olivine in the thin section	(a)	51.56	37.43	1900-2700	Segment 27	20VII-L12 (Wb-16-a)	wb-16-a-1-57				47.73	39.76			0.33	0.18		11.54	0.19		99.73	88.06				64.5675	0.24708	disequilibrium with host
	Olivine in the thin section	(a)	51.56	37.43	1900-2700	Segment 27	20VII-L12 (Wb-16-a)	wb-16-a-1-60				47.66	39.56			0.24	0.29		12.02	0.17		99.95	87.61				64.5675	0.257709	disequilibrium with host
	Olivine in the thin section	(a)	51.56	37.43	1900-2700	Segment 27	20VII-L12 (Wb-16-a)	wb-16-a-2-1				42.34	40.15			0.29	0.17		16.01	0.23		99.18	82.5				64.5675	0.386541	disequilibrium with host
	Olivine in the thin section	(a)	51.56	37.43	1900-2700	Segment 27	20VII-L12 (Wb-16-a)	wb-16-a-2-2				43.01	39.48			0.29	0.12		15.95	0.23		99.08	82.78				64.5675	0.37907	disequilibrium with host
	Olivine in the thin section	(a)	51.56	37.43	1900-2700	Segment 27	20VII-L12 (Wb-16-a)	wb-16-a-2-3				46.79	39.63			0.32	0.19		12.26	0.17		99.35	87.18				64.5675	0.267968	disequilibrium with host
	Olivine in the thin section	(a)	51.56	37.43	1900-2700	Segment 27	20VII-L12 (Wb-16-a)	wb-16-a-2-4				43.42	39.37			0.29	0.17		16.48	0.24		99.96	82.45				64.5675	0.38788	disequilibrium with host
	Olivine in the thin section	(a)	51.56	37.43	1900-2700	Segment 27	20VII-L12 (Wb-16-a)	wb-16-a-2-5				44.32	38.99			0.29	0.16		15.72	0.23		99.71	83.4				64.5675	0.362705	disequilibrium with host
	Olivine in the thin section	(a)	51.56	37.43	1900-2700	Segment 27	20VII-L12 (Wb-16-a)	wb-16-a-2-6				44.37	40.64			0.32	0.17		13.57	0.2		99.26	85.36				64.5675	0.312534
	Olivine in the thin section	(a)	51.56	37.43	1900-2700	Segment 27	20VII-L12 (Wb-16-a)	wb-16-a-2-7				44.19	39.17			0.29	0.16		15.95	0.23		99.99	83.16				64.5675	0.369011	disequilibrium with host
	Olivine in the thin section	(a)	51.56	37.43	1900-2700	Segment 27	20VII-L12 (Wb-16-a)	wb-16-a-2-8				43.65	40.33			0.25	0.32		15.13	0.19		99.87	83.72				64.5675	0.354353	disequilibrium with host
	Olivine in the thin section	(a)	51.56	37.43	1900-2700	Segment 27	20VII-L12 (Wb-16-a)	wb-16-a-2-9				45.6	40.83			0.27	0.3		12.07	0.15		99.22	87.07				64.5675	0.270608
	Olivine in the thin section	(a)	51.56	37.43	1900-2700	Segment 27	20VII-L12 (Wb-16-a)	wb-16-a-2-10				45.15	40.67			0.24	0.29		13.07	0.18		99.6	86.03				64.5675	0.295909
	Olivine in the thin section	(a)	51.56	37.43	1900-2700	Segment 27	20VII-L12 (Wb-16-a)	wb-16-a-2-11				42.8	40.18			0.31	0.11		15.99	0.24		99.63	82.68				64.5675	0.381732	disequilibrium with host
	Olivine in the thin section	(a)	51.56	37.43	1900-2700	Segment 27	20VII-L12 (Wb-16-a)	wb-16-a-2-12				45.62	40.67			0.33	0.16		12.52	0.18		99.47	86.66				64.5675	0.28051
	Olivine in the thin section	(a)	51.56	37.43	1900-2700	Segment 27	20VII-L12 (Wb-16-a)	wb-16-a-2-13				46.61	38.94			0.31	0.16		13.16	0.2		99.37	86.33				64.5675	0.288548
	Olivine in the thin section	(a)	51.56	37.43	1900-2700	Segment 27	20VII-L12 (Wb-16-a)	wb-16-a-2-14				43.46	39.25			0.29	0.16		16.56	0.23		99.94	82.39				64.5675	0.38949	disequilibrium with host
	Olivine in the thin section	(a)	51.56	37.43	1900-2700	Segment 27	20VII-L12 (Wb-16-a)	wb-16-a-2-15				44.76	38.8			0.31	0.11		15.17	0.23		99.37	84.02				64.5675	0.346581	disequilibrium with host
	Olivine in the thin section	(a)	51.56	37.43	1900-2700	Segment 27	20VII-L12 (Wb-16-a)	wb-16-a-2-16				44.4	39.09			0.31	0.11		15.15	0.23		99.29	83.93				64.5675	0.348907	disequilibrium with host
	Olivine in the thin section	(a)	51.56	37.43	1900-2700	Segment 27	20VII-L12 (Wb-16-a)	wb-16-a-2-17				47.77	40.17			0.32	0.2		10.71	0.18		99.34	88.82				64.5675	0.229373	disequilibrium with host
	Olivine in the thin section	(a)	51.56	37.43	1900-2700	Segment 27	20VII-L12 (Wb-16-a)	wb-16-a-2-18				46.45	40.39			0.33	0.16		12.2	0.2		99.72	87.16				64.5675	0.268447	disequilibrium with host
	Olivine in the thin section	(a)	51.56	37.43	1900-2700	Segment 27	20VII-L12 (Wb-16-a)	wb-16-a-2-19				43.83	39.28			0.29	0.15		16.48	0.24		100.26	82.58				64.5675	0.384401	disequilibrium with host
	Olivine in the thin section	(a)	51.56	37.43	1900-2700	Segment 27	20VII-L12 (Wb-16-a)	wb-16-a-2-20				49.24	39.59			0.27	0.31		10.27	0.15		99.83	89.53				64.5675	0.213103	disequilibrium with host
	Olivine in the thin section	(a)	51.56	37.43	1900-2700	Segment 27	20VII-L12 (Wb-16-a)	wb-16-a-2-22				45.04	39.93			0.28	0.16		13.73	0.2		99.34	85.4				64.5675	0.311535
	Olivine in the thin section	(a)	51.56	37.43	1900-2700	Segment 27	20VII-L12 (Wb-16-a)	wb-16-a-2-23A				43.97	40.11			0.27	0.19		15.02	0.19		99.74	83.92				64.5675	0.349166	disequilibrium with host
	Olivine in the thin section	(a)	51.56	37.43	1900-2700	Segment 27	20VII-L12 (Wb-16-a)	wb-16-a-2-23B				47.05	40.48			0.28	0.28		10.86	0.14		99.09	88.53				64.5675	0.236094	disequilibrium with host
	Olivine in the thin section	(a)	51.56	37.43	1900-2700	Segment 27	20VII-L12 (Wb-16-a)	wb-16-a-2-24				43.88	39.73			0.29	0.15		15.73	0.23		100.01	83.26				64.5675	0.366379	disequilibrium with host
	Olivine in the thin section	(a)	51.56	37.43	1900-2700	Segment 27	20VII-L12 (Wb-16-a)	wb-16-a-2-27				43.77	38.87			0.28	0.16		15.9	0.24		99.22	83.07				64.5675	0.371385	disequilibrium with host
	Olivine in the thin section	(a)	51.56	37.43	1900-2700	Segment 27	20VII-L12 (Wb-16-a)	wb-16-a-2-28A				46.95	40.27			0.28	0.28		11.75	0.14		99.67	87.69				64.5675	0.255811	disequilibrium with host
	Olivine in the thin section	(a)	51.56	37.43	1900-2700	Segment 27	20VII-L12 (Wb-16-a)	wb-16-a-2-28B				46.8	40.33			0.28	0.28		12	0.14		99.82	87.43				64.5675	0.261991	disequilibrium with host
	Olivine in the thin section	(a)	51.56	37.43	1900-2700	Segment 27	20VII-L12 (Wb-16-a)	wb-16-a-2-30				43.55	39.26			0.29	0.15		16.24	0.24		99.73	82.7				64.5675	0.381199	disequilibrium with host
	Olivine in the thin section	(a)	51.56	37.43	1900-2700	Segment 27	20VII-L12 (Wb-16-a)	wb-16-a-2-31				43.65	39.3			0.29	0.15		16.29	0.23		99.91	82.69				64.5675	0.381466	disequilibrium with host
	Olivine in the thin section	(a)	51.56	37.43	1900-2700	Segment 27	20VII-L12 (Wb-16-a)	wb-16-a-2-32				46.28	40.53			0.31	0.19		11.83	0.18		99.31	87.46				64.5675	0.261276	disequilibrium with host
	Olivine in the thin section	(a)	51.56	37.43	1900-2700	Segment 27	20VII-L12 (Wb-16-a)	wb-16-a-2-33A				46.96	39.69			0.33	0.16		12.04	0.2		99.38	87.42				64.5675	0.262229	disequilibrium with host
	Olivine in the thin section	(a)	51.56	37.43	1900-2700	Segment 27	20VII-L12 (Wb-16-a)	wb-16-a-2-33B				48.19	39.68			0.33	0.16		11.53	0.2		100.08	88.17				64.5675	0.244498	disequilibrium with host
		(a) Li W (2017) Petrogeochemical characteristics of basalts from Southwest Indian Ridge: Implications for magmatic processes at ultra-slow spreading ridge. Institute of Geophysics & Geomatics, Doctor thesis.
