# Supplementary material for: Magmatic processes within the plumbing system of the ultraslow-spreading southwest Indian ridge: constraints from olivine, plagioclase and melt inclusions
Source: Springer Nature journal article supplement (doi:10.1007/s00410-024-02098-0), 2024-02-22
Supplement: MOESM4 [file 410_2024_2098_MOESM4_ESM.xls]

## Sheet: Table S3
	Supplemental Table S3. Major element and Sr isotope compositions of plagioclase crystals of MORBS from SWIR
	Data Source	Sample	longitude（°E）	latitude（°S）	Deepth (m)	Zone	Spot	No.	Na2O	Al2O3	MgO	SiO2	K2O	TiO2	CaO	NiO	P2O5	FeO	MnO	Cr2O3	Total	An	Or	Ab	87Sr/86Sr	SE	KD(Ab–An)Pl–Liqiud	Note		host glass-Sample	SiO2	TiO2	Al2O3	FeOt	MnO	MgO	CaO	Na2O	K2O	Cr2O3	P2O5	LOI	Total	T24-liquild-Pl
	This study	DY34-IV	50.4853	37.697	1549	segment 27	34TVG-1	269	1.665	32.932	0.161	46.141	0.017	0	17.593	0.031		0.395	0.011	0.032	98.978	85.2946	0.0981329	14.6073			0.184126	Plagioclase in the thin section		277	49.4772	1.01541	15.7703	8.55839	0.212038	8.35782	13.4309	2.4166	0.039216	0.044866	0
	This study	DY34-IV	50.4853	37.697	1549	segment 27	34TVG-2	270	1.55	33.032	0.139	45.785	0	0	17.885	0		0.327	0	0.011	98.729	86.4435	0	13.5565			0.168611	Plagioclase in the thin section		277	49.4772	1.01541	15.7703	8.55839	0.212038	8.35782	13.4309	2.4166	0.039216	0.044866	0
	This study	DY34-IV	50.4853	37.697	1549	segment 27	34TVG-3	272	1.725	33.073	0.189	46.192	0	0.049	17.455	0.014		0.376	0.03	0	99.103	84.8298	0	15.1702			0.19227	Plagioclase in the thin section		277	49.4772	1.01541	15.7703	8.55839	0.212038	8.35782	13.4309	2.4166	0.039216	0.044866	0
	This study	DY34-IV	50.4853	37.697	1549	segment 27	34TVG-4	273	1.649	33.165	0.143	45.801	0.029	0.016	17.83	0.003		0.404	0.022	0	99.062	85.5218	0.165618	14.3126			0.179933	Plagioclase in the thin section		277	49.4772	1.01541	15.7703	8.55839	0.212038	8.35782	13.4309	2.4166	0.039216	0.044866	0
	This study	DY34-IV	50.4853	37.697	1549	segment 27	34TVG-5	275	1.551	33.452	0.132	45.693	0.012	0.024	17.766	0.002		0.351	0.001	0	98.984	86.2975	0.0694023	13.6331			0.169849	Plagioclase in the thin section		277	49.4772	1.01541	15.7703	8.55839	0.212038	8.35782	13.4309	2.4166	0.039216	0.044866	0
	This study	DY34-IV	50.4853	37.697	1549	segment 27	34TVG-6	276	1.814	32.856	0.191	46.976	0.043	0.024	17.196	0.011		0.384	0.02	0.025	99.54	83.7614	0.249384	15.9892			0.205235	Plagioclase in the thin section		277	49.4772	1.01541	15.7703	8.55839	0.212038	8.35782	13.4309	2.4166	0.039216	0.044866	0
	This study	DY34-IV	50.4853	37.697	1549	segment 27	34TVG-7	278	1.592	33.149	0.135	45.919	0.02	0	17.742	0		0.38	0.018	0.008	98.963	85.9317	0.115336	13.953			0.174575	Plagioclase in the thin section		277	49.4772	1.01541	15.7703	8.55839	0.212038	8.35782	13.4309	2.4166	0.039216	0.044866	0
	This study	DY34-IV	50.4853	37.697	1549	segment 27	34TVG-8	279	3.158	30.883	0.218	49.256	0.038	0.012	15.369	0		0.43	0.01	0	99.374	72.7394	0.214137	27.0464			0.399768	Plagioclase in the thin section		277	49.4772	1.01541	15.7703	8.55839	0.212038	8.35782	13.4309	2.4166	0.039216	0.044866	0
	(a)	20VII-L12	51.56	37.43	1900-2700	segment 27	1-A-MI1		2.33	31.03	0.2	48.12	0.03		15.51	0.05		0.33			97.65	78.5	0.2	21.3			0.292828			20VII-L12 (Wb-16-a)	48.65	1.07	16.54	8.76417	0.15	8.96	11.55	2.37	0.2		0.1	0.61	99.94	1241.25
	(a)	20VII-L12	51.56	37.43	1900-2700	segment 27	1-B-2-MI1		1.87	32.23	0.23	47.84	0.01		16.16		0.02	0.39			98.77	82.6	0.1	17.3			0.226031			20VII-L12 (Wb-16-a)	48.65	1.07	16.54	8.76417	0.15	8.96	11.55	2.37	0.2		0.1	0.61	99.94	1243.04
	(a)	20VII-L12	51.56	37.43	1900-2700	segment 27	1-B-2-MI2		1.87	32.23	0.23	47.84	0.01		16.16		0.02	0.39			98.77	82.6	0.1	17.3			0.226031			20VII-L12 (Wb-16-a)	48.65	1.07	16.54	8.76417	0.15	8.96	11.55	2.37	0.2		0.1	0.61	99.94	1243.04
	(a)	20VII-L12	51.56	37.43	1900-2700	segment 27	1-D-MI1		1.69	32.82	0.2	47.64		0.04	16.57	0.03		0.47	0	0.02	99.47	84.4	0	15.6			0.199473			20VII-L12 (Wb-16-a)	48.65	1.07	16.54	8.76417	0.15	8.96	11.55	2.37	0.2		0.1	0.61	99.94	1243.51
	(a)	20VII-L12	51.56	37.43	1900-2700	segment 27	1-D-MI2		1.69	32.82	0.2	47.64		0.04	16.57	0.03		0.47	0	0.02	99.47	84.4	0	15.6			0.199473			20VII-L12 (Wb-16-a)	48.65	1.07	16.54	8.76417	0.15	8.96	11.55	2.37	0.2		0.1	0.61	99.94	1243.51
	(a)	20VII-L12	51.56	37.43	1900-2700	segment 27	1-D-MI3		1.69	32.82	0.2	47.64		0.04	16.57	0.03		0.47	0	0.02	99.47	84.4	0	15.6			0.199473			20VII-L12 (Wb-16-a)	48.65	1.07	16.54	8.76417	0.15	8.96	11.55	2.37	0.2		0.1	0.61	99.94	1243.51
	(a)	20VII-L12	51.56	37.43	1900-2700	segment 27	1-D-MI4		1.69	32.82	0.2	47.64		0.04	16.57	0.03		0.47	0	0.02	99.47	84.4	0	15.6			0.199473			20VII-L12 (Wb-16-a)	48.65	1.07	16.54	8.76417	0.15	8.96	11.55	2.37	0.2		0.1	0.61	99.94	1243.51
	(a)	20VII-L12	51.56	37.43	1900-2700	segment 27	2-A-MI1		1.78	31.81	0.23	47.66	0.02	0.02	16.24	0.03	0.02	0.27	0.01	0.04	98.19	83.4	0.1	16.5			0.213511			20VII-L12 (Wb-16-a)	48.65	1.07	16.54	8.76417	0.15	8.96	11.55	2.37	0.2		0.1	0.61	99.94	1243.35
	(a)	20VII-L12	51.56	37.43	1900-2700	segment 27	2-A-MI10		1.83	31.8	0.2	47.52		0.06	16.39	0.01		0.39	0.01		98.22	83.2	0	16.8			0.217916			20VII-L12 (Wb-16-a)	48.65	1.07	16.54	8.76417	0.15	8.96	11.55	2.37	0.2		0.1	0.61	99.94	1243.16
	(a)	20VII-L12	51.56	37.43	1900-2700	segment 27	2-A-MI11		1.62	32.29	0.2	46.57	0.02		16.85	0.06	0.01	0.33	0	0.04	98.03	85.1	0.1	14.8			0.187687			20VII-L12 (Wb-16-a)	48.65	1.07	16.54	8.76417	0.15	8.96	11.55	2.37	0.2		0.1	0.61	99.94	1243.78
	(a)	20VII-L12	51.56	37.43	1900-2700	segment 27	2-A-MI2		1.78	31.81	0.23	47.66	0.02	0.02	16.24	0.03	0.02	0.27	0.01	0.04	98.19	83.4	0.1	16.5			0.213511			20VII-L12 (Wb-16-a)	48.65	1.07	16.54	8.76417	0.15	8.96	11.55	2.37	0.2		0.1	0.61	99.94	1243.35
	(a)	20VII-L12	51.56	37.43	1900-2700	segment 27	2-A-MI3		1.78	31.81	0.23	47.66	0.02	0.02	16.24	0.03	0.02	0.27	0.01	0.04	98.19	83.4	0.1	16.5			0.213511			20VII-L12 (Wb-16-a)	48.65	1.07	16.54	8.76417	0.15	8.96	11.55	2.37	0.2		0.1	0.61	99.94	1243.35
	(a)	20VII-L12	51.56	37.43	1900-2700	segment 27	2-A-MI4		1.78	31.81	0.23	47.66	0.02	0.02	16.24	0.03	0.02	0.27	0.01	0.04	98.19	83.4	0.1	16.5			0.213511			20VII-L12 (Wb-16-a)	48.65	1.07	16.54	8.76417	0.15	8.96	11.55	2.37	0.2		0.1	0.61	99.94	1243.35
	(a)	20VII-L12	51.56	37.43	1900-2700	segment 27	2-A-MI5		1.78	31.81	0.23	47.66	0.02	0.02	16.24	0.03	0.02	0.27	0.01	0.04	98.19	83.4	0.1	16.5			0.213511			20VII-L12 (Wb-16-a)	48.65	1.07	16.54	8.76417	0.15	8.96	11.55	2.37	0.2		0.1	0.61	99.94	1243.35
	(a)	20VII-L12	51.56	37.43	1900-2700	segment 27	2-A-MI6		1.78	31.81	0.23	47.66	0.02	0.02	16.24	0.03	0.02	0.27	0.01	0.04	98.19	83.4	0.1	16.5			0.213511			20VII-L12 (Wb-16-a)	48.65	1.07	16.54	8.76417	0.15	8.96	11.55	2.37	0.2		0.1	0.61	99.94	1243.35
	(a)	20VII-L12	51.56	37.43	1900-2700	segment 27	2-A-MI7		1.78	31.81	0.23	47.66	0.02	0.02	16.24	0.03	0.02	0.27	0.01	0.04	98.19	83.4	0.1	16.5			0.213511			20VII-L12 (Wb-16-a)	48.65	1.07	16.54	8.76417	0.15	8.96	11.55	2.37	0.2		0.1	0.61	99.94	1243.35
	(a)	20VII-L12	51.56	37.43	1900-2700	segment 27	2-A-MI8		1.78	31.81	0.23	47.66	0.02	0.02	16.24	0.03	0.02	0.27	0.01	0.04	98.19	83.4	0.1	16.5			0.213511			20VII-L12 (Wb-16-a)	48.65	1.07	16.54	8.76417	0.15	8.96	11.55	2.37	0.2		0.1	0.61	99.94	1243.35
	(a)	20VII-L12	51.56	37.43	1900-2700	segment 27	2-A-MI9		1.78	31.81	0.23	47.66	0.02	0.02	16.24	0.03	0.02	0.27	0.01	0.04	98.19	83.4	0.1	16.5			0.213511			20VII-L12 (Wb-16-a)	48.65	1.07	16.54	8.76417	0.15	8.96	11.55	2.37	0.2		0.1	0.61	99.94	1243.35
	(a)	20VII-L12	51.56	37.43	1900-2700	segment 27	2-B-MI1		1.55	32.14	0.19	46.4	0.01	0.04	16.62	0.07		0.42		0.07	97.51	85.5	0	14.4			0.18176			20VII-L12 (Wb-16-a)	48.65	1.07	16.54	8.76417	0.15	8.96	11.55	2.37	0.2		0.1	0.61	99.94	1243.8
	(a)	20VII-L12	51.56	37.43	1900-2700	segment 27	2-B-MI2		1.55	32.14	0.19	46.4	0.01	0.04	16.62	0.07		0.42		0.07	97.51	85.5	0	14.4			0.18176			20VII-L12 (Wb-16-a)	48.65	1.07	16.54	8.76417	0.15	8.96	11.55	2.37	0.2		0.1	0.61	99.94	1243.8
	(a)	20VII-L12	51.56	37.43	1900-2700	segment 27	2-D-MI1		2.41	31.28	0.21	49.12	0.01	0.01	15.17	0.01	0	0.5			98.76	77.6	0.1	22.3			0.310131			20VII-L12 (Wb-16-a)	48.65	1.07	16.54	8.76417	0.15	8.96	11.55	2.37	0.2		0.1	0.61	99.94	1240.54
	(a)	20VII-L12	51.56	37.43	1900-2700	segment 27	2-E-2-MI1		1.79	32.25	0.17	47.81	0.01		16.33		0.01	0.37	0.04	0.07	98.85	83.4	0.1	16.6			0.214805			20VII-L12 (Wb-16-a)	48.65	1.07	16.54	8.76417	0.15	8.96	11.55	2.37	0.2		0.1	0.61	99.94	1243.29
	(a)	20VII-L12	51.56	37.43	1900-2700	segment 27	2-E-2-MI3		1.79	32.25	0.17	47.81	0.01		16.33		0.01	0.37	0.04	0.07	98.85	83.4	0.1	16.6			0.214805			20VII-L12 (Wb-16-a)	48.65	1.07	16.54	8.76417	0.15	8.96	11.55	2.37	0.2		0.1	0.61	99.94	1243.29
	(a)	20VII-L12	51.56	37.43	1900-2700	segment 27	2-E-2-MI5		1.79	32.25	0.17	47.81	0.01		16.33		0.01	0.37	0.04	0.07	98.85	83.4	0.1	16.6			0.214805			20VII-L12 (Wb-16-a)	48.65	1.07	16.54	8.76417	0.15	8.96	11.55	2.37	0.2		0.1	0.61	99.94	1243.29
	(a)	20VII-L12	51.56	37.43	1900-2700	segment 27	2-E-3-MI1		2.32	31.7	0.29	49.34	0.01	0.01	15.47	0.02		0.35			99.51	78.6	0.1	21.4			0.293828			20VII-L12 (Wb-16-a)	48.65	1.07	16.54	8.76417	0.15	8.96	11.55	2.37	0.2		0.1	0.61	99.94	1241.15
	(a)	20VII-L12	51.56	37.43	1900-2700	segment 27	2-E-3-MI3		2.32	31.7	0.29	49.34	0.01	0.01	15.47	0.02		0.35			99.51	78.6	0.1	21.4			0.293828			20VII-L12 (Wb-16-a)	48.65	1.07	16.54	8.76417	0.15	8.96	11.55	2.37	0.2		0.1	0.61	99.94	1241.15
	(a)	20VII-L12	51.56	37.43	1900-2700	segment 27	2-F-MI1a		2.14	31.43	0.19	48.38	0.01	0.02	15.68		0	0.47		0.02	98.42	80.2	0	19.8			0.266436			20VII-L12 (Wb-16-a)	48.65	1.07	16.54	8.76417	0.15	8.96	11.55	2.37	0.2		0.1	0.61	99.94	1241.98
	(a)	20VII-L12	51.56	37.43	1900-2700	segment 27	2-F-MI1b		2.14	31.43	0.19	48.38	0.01	0.02	15.68		0	0.47		0.02	98.42	80.2	0	19.8			0.266436			20VII-L12 (Wb-16-a)	48.65	1.07	16.54	8.76417	0.15	8.96	11.55	2.37	0.2		0.1	0.61	99.94	1241.98
	(a)	20VII-L12	51.56	37.43	1900-2700	segment 27	2-F-MI2		2.2	31.49	0.2	47.94	0.01	0.01	15.75	0.03	0.03	0.45			98.15	79.8	0.1	20.2			0.273181			20VII-L12 (Wb-16-a)	48.65	1.07	16.54	8.76417	0.15	8.96	11.55	2.37	0.2		0.1	0.61	99.94	1241.79
	(a)	20VII-L12	51.56	37.43	1900-2700	segment 27	3-A-MI1		1.97	32.24	0.19	47.9	0.02	0.02	16.21	0.05	0.01	0.34	0.04		99.04	81.9	0.1	18			0.237187			20VII-L12 (Wb-16-a)	48.65	1.07	16.54	8.76417	0.15	8.96	11.55	2.37	0.2		0.1	0.61	99.94	1242.83
	(a)	20VII-L12	51.56	37.43	1900-2700	segment 27	3-A-MI2		1.97	32.24	0.19	47.9	0.02	0.02	16.21	0.05	0.01	0.34	0.04		99.04	81.9	0.1	18			0.237187			20VII-L12 (Wb-16-a)	48.65	1.07	16.54	8.76417	0.15	8.96	11.55	2.37	0.2		0.1	0.61	99.94	1242.83
	(a)	20VII-L12	51.56	37.43	1900-2700	segment 27	3-A-MI3		1.97	32.24	0.19	47.9	0.02	0.02	16.21	0.05	0.01	0.34	0.04		99.04	81.9	0.1	18			0.237187			20VII-L12 (Wb-16-a)	48.65	1.07	16.54	8.76417	0.15	8.96	11.55	2.37	0.2		0.1	0.61	99.94	1242.83
	(a)	20VII-L12	51.56	37.43	1900-2700	segment 27	3-A-MI4		1.97	32.24	0.19	47.9	0.02	0.02	16.21	0.05	0.01	0.34	0.04		99.04	81.9	0.1	18			0.237187			20VII-L12 (Wb-16-a)	48.65	1.07	16.54	8.76417	0.15	8.96	11.55	2.37	0.2		0.1	0.61	99.94	1242.83
	(a)	20VII-L12	51.56	37.43	1900-2700	segment 27	3-A-MI5		1.97	32.24	0.19	47.9	0.02	0.02	16.21	0.05	0.01	0.34	0.04		99.04	81.9	0.1	18			0.237187			20VII-L12 (Wb-16-a)	48.65	1.07	16.54	8.76417	0.15	8.96	11.55	2.37	0.2		0.1	0.61	99.94	1242.83
	(a)	20VII-L12	51.56	37.43	1900-2700	segment 27	3-A-MI6		1.97	32.24	0.19	47.9	0.02	0.02	16.21	0.05	0.01	0.34	0.04		99.04	81.9	0.1	18			0.237187			20VII-L12 (Wb-16-a)	48.65	1.07	16.54	8.76417	0.15	8.96	11.55	2.37	0.2		0.1	0.61	99.94	1242.83
	(a)	20VII-L12	51.56	37.43	1900-2700	segment 27	3-A-MI7		1.93	32.41	0.22	48.04	0.01		16.29	0.1		0.35	0.04	0.05	99.43	82.3	0.1	17.7			0.2321			20VII-L12 (Wb-16-a)	48.65	1.07	16.54	8.76417	0.15	8.96	11.55	2.37	0.2		0.1	0.61	99.94	1242.92
	(a)	20VII-L12	51.56	37.43	1900-2700	segment 27	3-B-MI1		1.82	32.88	0.23	47.97	0.06	0.03	16.37		0.03	0.42	0.03	0.01	100.26	83	0.3	16.7			0.21714			20VII-L12 (Wb-16-a)	48.65	1.07	16.54	8.76417	0.15	8.96	11.55	2.37	0.2		0.1	0.61	99.94	1243.51
	(a)	20VII-L12	51.56	37.43	1900-2700	segment 27	3-C-MI1		2.09	31.91	0.19	47.8	0	0.03	16.09			0.48	0.01	0.04	98.68	80.9	0	19			0.253459			20VII-L12 (Wb-16-a)	48.65	1.07	16.54	8.76417	0.15	8.96	11.55	2.37	0.2		0.1	0.61	99.94	1242.29
	(a)	20VII-L12	51.56	37.43	1900-2700	segment 27	3-C-MI2		2.09	31.91	0.19	47.8	0	0.03	16.09			0.48	0.01	0.04	98.68	80.9	0	19			0.253459			20VII-L12 (Wb-16-a)	48.65	1.07	16.54	8.76417	0.15	8.96	11.55	2.37	0.2		0.1	0.61	99.94	1242.29
	(a)	20VII-L12	51.56	37.43	1900-2700	segment 27	3-C-MI3		2.09	31.91	0.19	47.8	0	0.03	16.09			0.48	0.01	0.04	98.68	80.9	0	19			0.253459			20VII-L12 (Wb-16-a)	48.65	1.07	16.54	8.76417	0.15	8.96	11.55	2.37	0.2		0.1	0.61	99.94	1242.29
	(a)	20VII-L12	51.56	37.43	1900-2700	segment 27	3-C-MI5		2.09	31.91	0.19	47.8	0	0.03	16.09			0.48	0.01	0.04	98.68	80.9	0	19			0.253459			20VII-L12 (Wb-16-a)	48.65	1.07	16.54	8.76417	0.15	8.96	11.55	2.37	0.2		0.1	0.61	99.94	1242.29
	(a)	20VII-L12	51.56	37.43	1900-2700	segment 27	3-E-MI1		1.84	31.81	0.18	46.88	0.01		16.3		0.02	0.47	0.03	0.02	97.68	83	0	16.9			0.219741			20VII-L12 (Wb-16-a)	48.65	1.07	16.54	8.76417	0.15	8.96	11.55	2.37	0.2		0.1	0.61	99.94	1243.16
	(a)	20VII-L12	51.56	37.43	1900-2700	segment 27	3-E-MI2		2.07	31.57	0.18	47.51	0.01	0.03	15.83	0	0.01	0.32	0.09	0.05	97.69	80.8	0.1	19.1			0.255108			20VII-L12 (Wb-16-a)	48.65	1.07	16.54	8.76417	0.15	8.96	11.55	2.37	0.2		0.1	0.61	99.94	1242.3
	(a)	20VII-L12	51.56	37.43	1900-2700	segment 27	3-E-MI3		2.07	31.57	0.18	47.51	0.01	0.03	15.83	0	0.01	0.32	0.09	0.05	97.69	80.8	0.1	19.1			0.255108			20VII-L12 (Wb-16-a)	48.65	1.07	16.54	8.76417	0.15	8.96	11.55	2.37	0.2		0.1	0.61	99.94	1242.3
	(a)	20VII-L12	51.56	37.43	1900-2700	segment 27	3-F-MI1		1.7	31.33	0.15	46.35	0.02		16.56			0.41	0.03	0.02	96.56	84.3	0.1	15.6			0.19971			20VII-L12 (Wb-16-a)	48.65	1.07	16.54	8.76417	0.15	8.96	11.55	2.37	0.2		0.1	0.61	99.94	1243.59
	(a)	20VII-L12	51.56	37.43	1900-2700	segment 27	3-G-M1		1.8	32.06	0.16	47.46	0.01		16.14	0	0.01	0.39	0	0.04	98.07	83.2	0.1	16.8			0.217916			20VII-L12 (Wb-16-a)	48.65	1.07	16.54	8.76417	0.15	8.96	11.55	2.37	0.2		0.1	0.61	99.94	1243.22
	(a)	20VII-L12	51.56	37.43	1900-2700	segment 27	3-G-MI2		1.9	31.9	0.16	47.53	0.02	0.01	16.21	0.04		0.45	0.01	0.04	98.27	82.4	0.1	17.5			0.229199			20VII-L12 (Wb-16-a)	48.65	1.07	16.54	8.76417	0.15	8.96	11.55	2.37	0.2		0.1	0.61	99.94	1243.03
	(a)	20VII-L12	51.56	37.43	1900-2700	segment 27	3-G-MI3		1.9	31.9	0.16	47.53	0.02	0.01	16.21	0.04		0.45	0.01	0.04	98.27	82.4	0.1	17.5			0.229199			20VII-L12 (Wb-16-a)	48.65	1.07	16.54	8.76417	0.15	8.96	11.55	2.37	0.2		0.1	0.61	99.94	1243.03
	(a)	20VII-L12	51.56	37.43	1900-2700	segment 27	3-G-MI4		1.97	31.94	0.19	48.1	0.01	0.02	15.88		0.03	0.41	0.02	0.06	98.64	81.6	0.1	18.3			0.242027			20VII-L12 (Wb-16-a)	48.65	1.07	16.54	8.76417	0.15	8.96	11.55	2.37	0.2		0.1	0.61	99.94	1242.65
	(a)	20VII-L12	51.56	37.43	1900-2700	segment 27	4-A-MI1		2	32.32	0.2	48.21	0	0.01	16.3	0.01	0.01	0.37			99.51	81.8	0	18.2			0.240116			20VII-L12 (Wb-16-a)	48.65	1.07	16.54	8.76417	0.15	8.96	11.55	2.37	0.2		0.1	0.61	99.94	1242.66
	(a)	20VII-L12	51.56	37.43	1900-2700	segment 27	4-A-MI2		1.73	32.89	0.19	47.41	0.01	0.06	16.72	0.02		0.4	0.03		99.47	84.2	0	15.8			0.20251			20VII-L12 (Wb-16-a)	48.65	1.07	16.54	8.76417	0.15	8.96	11.55	2.37	0.2		0.1	0.61	99.94	1243.51
	(a)	20VII-L12	51.56	37.43	1900-2700	segment 27	4-B-MI1		1.72	32.12	0.2	47.57	0.02	0.04	16.48	0.04	0.04	0.41	0.03	0.06	98.94	84	0.1	15.9			0.204277			20VII-L12 (Wb-16-a)	48.65	1.07	16.54	8.76417	0.15	8.96	11.55	2.37	0.2		0.1	0.61	99.94	1243.54
	(a)	20VII-L12	51.56	37.43	1900-2700	segment 27	4-B-MI2		1.87	31.83	0.18	47.75	0.02		16.36	0.03	0.03	0.4	0.01		98.71	82.8	0.1	17.1			0.222878			20VII-L12 (Wb-16-a)	48.65	1.07	16.54	8.76417	0.15	8.96	11.55	2.37	0.2		0.1	0.61	99.94	1243.16
	(a)	20VII-L12	51.56	37.43	1900-2700	segment 27	4-B-MI3		1.81	31.78	0.22	47.27	0.03		16.32		0.02	0.37		0.05	98.06	83.2	0.2	16.7			0.216618			20VII-L12 (Wb-16-a)	48.65	1.07	16.54	8.76417	0.15	8.96	11.55	2.37	0.2		0.1	0.61	99.94	1243.35
	(a)	20VII-L12	51.56	37.43	1900-2700	segment 27	4-B-MI4		1.81	31.78	0.22	47.27	0.03		16.32		0.02	0.37		0.05	98.06	83.2	0.2	16.7			0.216618			20VII-L12 (Wb-16-a)	48.65	1.07	16.54	8.76417	0.15	8.96	11.55	2.37	0.2		0.1	0.61	99.94	1243.35
	(a)	20VII-L12	51.56	37.43	1900-2700	segment 27	4-B-MI5		1.63	31.86	0.22	47.02	0.03	0.01	16.23		0.02	0.34	0.1		97.66	84.5	0.2	15.4			0.196683			20VII-L12 (Wb-16-a)	48.65	1.07	16.54	8.76417	0.15	8.96	11.55	2.37	0.2		0.1	0.61	99.94	1243.72
	(a)	20VII-L12	51.56	37.43	1900-2700	segment 27	4-D-MI1		1.96	32.16	0.18	48.2	0.02	0.02	16.29			0.41	0.02		99.48	82	0.1	17.9			0.235582			20VII-L12 (Wb-16-a)	48.65	1.07	16.54	8.76417	0.15	8.96	11.55	2.37	0.2		0.1	0.61	99.94	1242.89
	(a)	20VII-L12	51.56	37.43	1900-2700	segment 27	5-A-MI1		1.62	32.31	0.2	47.13	0	0.03	16.82	0.03	0.02	0.27		0.03	98.69	85.2	0	14.8			0.187467			20VII-L12 (Wb-16-a)	48.65	1.07	16.54	8.76417	0.15	8.96	11.55	2.37	0.2		0.1	0.61	99.94	1243.67
	(a)	20VII-L12	51.56	37.43	1900-2700	segment 27	5-A-MI10		1.62	32.31	0.2	47.13	0	0.03	16.82	0.03	0.02	0.27		0.03	98.69	85.2	0	14.8			0.187467			20VII-L12 (Wb-16-a)	48.65	1.07	16.54	8.76417	0.15	8.96	11.55	2.37	0.2		0.1	0.61	99.94	1243.67
	(a)	20VII-L12	51.56	37.43	1900-2700	segment 27	5-A-MI11		1.62	32.31	0.2	47.13	0	0.03	16.82	0.03	0.02	0.27		0.03	98.69	85.2	0	14.8			0.187467			20VII-L12 (Wb-16-a)	48.65	1.07	16.54	8.76417	0.15	8.96	11.55	2.37	0.2		0.1	0.61	99.94	1243.67
	(a)	20VII-L12	51.56	37.43	1900-2700	segment 27	5-A-MI12		1.62	32.31	0.2	47.13	0	0.03	16.82	0.03	0.02	0.27		0.03	98.69	85.2	0	14.8			0.187467			20VII-L12 (Wb-16-a)	48.65	1.07	16.54	8.76417	0.15	8.96	11.55	2.37	0.2		0.1	0.61	99.94	1243.67
	(a)	20VII-L12	51.56	37.43	1900-2700	segment 27	5-A-MI13		1.62	32.31	0.2	47.13	0	0.03	16.82	0.03	0.02	0.27		0.03	98.69	85.2	0	14.8			0.187467			20VII-L12 (Wb-16-a)	48.65	1.07	16.54	8.76417	0.15	8.96	11.55	2.37	0.2		0.1	0.61	99.94	1243.67
	(a)	20VII-L12	51.56	37.43	1900-2700	segment 27	5-A-MI14		1.62	32.31	0.2	47.13	0	0.03	16.82	0.03	0.02	0.27		0.03	98.69	85.2	0	14.8			0.187467			20VII-L12 (Wb-16-a)	48.65	1.07	16.54	8.76417	0.15	8.96	11.55	2.37	0.2		0.1	0.61	99.94	1243.67
	(a)	20VII-L12	51.56	37.43	1900-2700	segment 27	5-A-MI2		1.62	32.31	0.2	47.13	0	0.03	16.82	0.03	0.02	0.27		0.03	98.69	85.2	0	14.8			0.187467			20VII-L12 (Wb-16-a)	48.65	1.07	16.54	8.76417	0.15	8.96	11.55	2.37	0.2		0.1	0.61	99.94	1243.67
	(a)	20VII-L12	51.56	37.43	1900-2700	segment 27	5-A-MI2		1.62	32.31	0.2	47.13	0	0.03	16.82	0.03	0.02	0.27		0.03	98.69	85.2	0	14.8			0.187467			20VII-L12 (Wb-16-a)	48.65	1.07	16.54	8.76417	0.15	8.96	11.55	2.37	0.2		0.1	0.61	99.94	1243.67
	(a)	20VII-L12	51.56	37.43	1900-2700	segment 27	5-A-MI3		1.62	32.31	0.2	47.13	0	0.03	16.82	0.03	0.02	0.27		0.03	98.69	85.2	0	14.8			0.187467			20VII-L12 (Wb-16-a)	48.65	1.07	16.54	8.76417	0.15	8.96	11.55	2.37	0.2		0.1	0.61	99.94	1243.67
	(a)	20VII-L12	51.56	37.43	1900-2700	segment 27	5-A-MI4		1.62	32.31	0.2	47.13	0	0.03	16.82	0.03	0.02	0.27		0.03	98.69	85.2	0	14.8			0.187467			20VII-L12 (Wb-16-a)	48.65	1.07	16.54	8.76417	0.15	8.96	11.55	2.37	0.2		0.1	0.61	99.94	1243.67
	(a)	20VII-L12	51.56	37.43	1900-2700	segment 27	5-A-MI5		1.62	32.31	0.2	47.13	0	0.03	16.82	0.03	0.02	0.27		0.03	98.69	85.2	0	14.8			0.187467			20VII-L12 (Wb-16-a)	48.65	1.07	16.54	8.76417	0.15	8.96	11.55	2.37	0.2		0.1	0.61	99.94	1243.67
	(a)	20VII-L12	51.56	37.43	1900-2700	segment 27	5-A-MI6		1.62	32.31	0.2	47.13	0	0.03	16.82	0.03	0.02	0.27		0.03	98.69	85.2	0	14.8			0.187467			20VII-L12 (Wb-16-a)	48.65	1.07	16.54	8.76417	0.15	8.96	11.55	2.37	0.2		0.1	0.61	99.94	1243.67
	(a)	20VII-L12	51.56	37.43	1900-2700	segment 27	5-A-MI7		1.62	32.31	0.2	47.13	0	0.03	16.82	0.03	0.02	0.27		0.03	98.69	85.2	0	14.8			0.187467			20VII-L12 (Wb-16-a)	48.65	1.07	16.54	8.76417	0.15	8.96	11.55	2.37	0.2		0.1	0.61	99.94	1243.67
	(a)	20VII-L12	51.56	37.43	1900-2700	segment 27	5-A-MI8		1.62	32.31	0.2	47.13	0	0.03	16.82	0.03	0.02	0.27		0.03	98.69	85.2	0	14.8			0.187467			20VII-L12 (Wb-16-a)	48.65	1.07	16.54	8.76417	0.15	8.96	11.55	2.37	0.2		0.1	0.61	99.94	1243.67
	(a)	20VII-L12	51.56	37.43	1900-2700	segment 27	5-A-MI9		1.62	32.31	0.2	47.13	0	0.03	16.82	0.03	0.02	0.27		0.03	98.69	85.2	0	14.8			0.187467			20VII-L12 (Wb-16-a)	48.65	1.07	16.54	8.76417	0.15	8.96	11.55	2.37	0.2		0.1	0.61	99.94	1243.67
	(a)	20VII-L12	51.56	37.43	1900-2700	segment 27	5-B-1-MI1		1.87	32.5	0.21	48.13	0.01	0.04	16.28	0.07	0.01	0.34			99.79	82.8	0.1	17.2			0.224182			20VII-L12 (Wb-16-a)	48.65	1.07	16.54	8.76417	0.15	8.96	11.55	2.37	0.2		0.1	0.61	99.94	1243.08
	(a)	20VII-L12	51.56	37.43	1900-2700	segment 27	5-B-1-MI1		1.87	32.5	0.21	48.13	0.01	0.04	16.28	0.07	0.01	0.34			99.79	82.8	0.1	17.2			0.224182			20VII-L12 (Wb-16-a)	48.65	1.07	16.54	8.76417	0.15	8.96	11.55	2.37	0.2		0.1	0.61	99.94	1243.08
	(a)	20VII-L12	51.56	37.43	1900-2700	segment 27	5-B-1-MI2		1.85	32.36	0.18	47.89	0.01	0.01	16.53		0.03	0.31		0.04	99.4	83.1	0.1	16.8			0.218178			20VII-L12 (Wb-16-a)	48.65	1.07	16.54	8.76417	0.15	8.96	11.55	2.37	0.2		0.1	0.61	99.94	1243.2
	(a)	20VII-L12	51.56	37.43	1900-2700	segment 27	5-B-1-MI2		1.85	32.36	0.18	47.89	0.01	0.01	16.53		0.03	0.31		0.04	99.4	83.1	0.1	16.8			0.218178			20VII-L12 (Wb-16-a)	48.65	1.07	16.54	8.76417	0.15	8.96	11.55	2.37	0.2		0.1	0.61	99.94	1243.2
	(a)	20VII-L12	51.56	37.43	1900-2700	segment 27	5-B-1-MI3		1.84	32.16	0.2	48.02		0.01	16.2			0.44		0.04	99.16	82.9	0	17.1			0.22261			20VII-L12 (Wb-16-a)	48.65	1.07	16.54	8.76417	0.15	8.96	11.55	2.37	0.2		0.1	0.61	99.94	1243.08
	(a)	20VII-L12	51.56	37.43	1900-2700	segment 27	5-B-2-MI1		1.96	31.86	0.21	48.44	0.01	0.02	15.95	0.03	0.03	0.34		0.02	99.12	81.7	0.1	18.2			0.240409			20VII-L12 (Wb-16-a)	48.65	1.07	16.54	8.76417	0.15	8.96	11.55	2.37	0.2		0.1	0.61	99.94	1242.71
	(a)	20VII-L12	51.56	37.43	1900-2700	segment 27	5-B-2-MI5		1.8	32.45	0.23	47.95	0.01	0.05	16.58		0.03	0.32	0.05		99.72	83.6	0	16.4			0.211709			20VII-L12 (Wb-16-a)	48.65	1.07	16.54	8.76417	0.15	8.96	11.55	2.37	0.2		0.1	0.61	99.94	1243.33
	(a)	20VII-L12	51.56	37.43	1900-2700	segment 27	5-B-3-MI1		1.77	32.29	0.22	47.43	0	0.01	16.52		0.01	0.34	0.01	0.03	98.84	83.8	0	16.2			0.208628			20VII-L12 (Wb-16-a)	48.65	1.07	16.54	8.76417	0.15	8.96	11.55	2.37	0.2		0.1	0.61	99.94	1243.33
	(a)	20VII-L12	51.56	37.43	1900-2700	segment 27	5-B-3-MI2		1.77	32.29	0.22	47.43	0	0.01	16.52		0.01	0.34	0.01	0.03	98.84	83.8	0	16.2			0.208628			20VII-L12 (Wb-16-a)	48.65	1.07	16.54	8.76417	0.15	8.96	11.55	2.37	0.2		0.1	0.61	99.94	1243.33
	(a)	20VII-L12	51.56	37.43	1900-2700	segment 27	5-B-3-MI3		1.77	32.29	0.22	47.43	0	0.01	16.52		0.01	0.34	0.01	0.03	98.84	83.8	0	16.2			0.208628			20VII-L12 (Wb-16-a)	48.65	1.07	16.54	8.76417	0.15	8.96	11.55	2.37	0.2		0.1	0.61	99.94	1243.33
	(a)	20VII-L12	51.56	37.43	1900-2700	segment 27	5-B-3-MI4		1.77	32.29	0.22	47.43	0	0.01	16.52		0.01	0.34	0.01	0.03	98.84	83.8	0	16.2			0.208628			20VII-L12 (Wb-16-a)	48.65	1.07	16.54	8.76417	0.15	8.96	11.55	2.37	0.2		0.1	0.61	99.94	1243.33
	(a)	20VII-L12	51.56	37.43	1900-2700	segment 27	5-B-3-MI5		1.77	32.29	0.22	47.43	0	0.01	16.52		0.01	0.34	0.01	0.03	98.84	83.8	0	16.2			0.208628			20VII-L12 (Wb-16-a)	48.65	1.07	16.54	8.76417	0.15	8.96	11.55	2.37	0.2		0.1	0.61	99.94	1243.33
	(a)	20VII-L12	51.56	37.43	1900-2700	segment 27	5-B-3-MI6		1.77	32.29	0.22	47.43	0	0.01	16.52		0.01	0.34	0.01	0.03	98.84	83.8	0	16.2			0.208628			20VII-L12 (Wb-16-a)	48.65	1.07	16.54	8.76417	0.15	8.96	11.55	2.37	0.2		0.1	0.61	99.94	1243.33
	(a)	20VII-L12	51.56	37.43	1900-2700	segment 27	5-B-3-MI8		1.42	32.59	0.24	46.52	0	0.01	17.14	0.01	0.02	0.32		0.03	98.56	86.9	0	13.1			0.162687			20VII-L12 (Wb-16-a)	48.65	1.07	16.54	8.76417	0.15	8.96	11.55	2.37	0.2		0.1	0.61	99.94	1243.94
	(a)	20VII-L12	51.56	37.43	1900-2700	segment 27	5-B-3-MI9		1.42	32.59	0.24	46.52	0	0.01	17.14	0.01	0.02	0.32		0.03	98.56	86.9	0	13.1			0.162687			20VII-L12 (Wb-16-a)	48.65	1.07	16.54	8.76417	0.15	8.96	11.55	2.37	0.2		0.1	0.61	99.94	1243.94
	(a)	20VII-L12	51.56	37.43	1900-2700	segment 27	5-F-MI2		1.82	31.74	0.21	47.1	0	0.07	16.66	0.03		0.35			98.19	83.5	0	16.5			0.213255			20VII-L12 (Wb-16-a)	48.65	1.07	16.54	8.76417	0.15	8.96	11.55	2.37	0.2		0.1	0.61	99.94	1243.25
	This study	30IV-TVG04	49.6872	37.7386	1549	segment 28	30TVG-4-1	280	1.674	33.045	0.228	46.504	0.006	0.038	17.765	0.014		0.332	0.006	0.031	99.643	85.4031	0.0343434	14.5625			0.183329	Plagioclase in the thin section		277	49.4772	1.01541	15.7703	8.55839	0.212038	8.35782	13.4309	2.4166	0.039216	0.044866	0
	This study	30IV-TVG04	49.6872	37.7386	1549	segment 28	30TVG-4-2	281	1.989	32.797	0.242	47.153	0.004	0.015	17.253	0		0.357	0	0.059	99.869	82.7205	0.0228346	17.2567	0.703182	0.00013412	0.224291	Plagioclase in the thin section		277	49.4772	1.01541	15.7703	8.55839	0.212038	8.35782	13.4309	2.4166	0.039216	0.044866	0
	This study	30IV-TVG04	49.6872	37.7386	2946	segment 28	30TVG-4-3-1	283	2.05	32.87	0.237	47.789	0	0	17.05	0		0.363	0	0	100.359	82.1307	0	17.8693	0.703039	0.000139575	0.233922	Plagioclase in the thin section		30IV-TVG04	49.2	1.224	18.17		0.152	6.17	11.98	2.68	0.2		0.105	-0.01	99.811
	This study	30IV-TVG04	49.6872	37.7386	2946	segment 28	30TVG-4-3-2	284	4.159	29.041	0.278	51.826	0.013	0.047	13.486	0		0.706	0	0.018	99.574	64.1352	0.0736107	35.7912	0.703179	0.0001159	0.599995	Plagioclase in the thin section		30IV-TVG04	49.2	1.224	18.17		0.152	6.17	11.98	2.68	0.2		0.105	-0.01	99.811
	This study	30IV-TVG04	49.6872	37.7386	2946	segment 28	30TVG-4-4 Line 001	285	4.166	29.35	0.28	52.057	0.022	0.071	13.664	0		0.7	0.025	0	100.335	64.3653	0.12339	35.5113	0.703159	8.23715e-05	0.593176	Plagioclase in the thin section		30IV-TVG04	49.2	1.224	18.17		0.152	6.17	11.98	2.68	0.2		0.105	-0.01	99.811
	This study	30IV-TVG04	49.6872	37.7386	2946	segment 28	30TVG-4-4 Line 002	286	2.078	32.916	0.243	47.753	0.007	0	16.859	0		0.336	0	0.013	100.205	81.7303	0.0404048	18.2293	0.703163	9.34715e-05	0.239804	Plagioclase in the thin section		30IV-TVG04	49.2	1.224	18.17		0.152	6.17	11.98	2.68	0.2		0.105	-0.01	99.811
	This study	30IV-TVG04	49.6872	37.7386	2946	segment 28	30TVG-4-4 Line 003	287	1.839	33.476	0.238	47.25	0	0.021	17.631	0		0.392	0.023	0.018	100.888	84.1222	0	15.8778			0.20293	Plagioclase in the thin section		30IV-TVG04	49.2	1.224	18.17		0.152	6.17	11.98	2.68	0.2		0.105	-0.01	99.811
	This study	30IV-TVG04	49.6872	37.7386	2946	segment 28	30TVG-4-4 Line 004	288	2.136	33.074	0.229	47.699	0.018	0.017	17.097	0.018		0.457	0	0	100.745	81.4777	0.102135	18.4202			0.243065	Plagioclase in the thin section		30IV-TVG04	49.2	1.224	18.17		0.152	6.17	11.98	2.68	0.2		0.105	-0.01	99.811
	This study	30IV-TVG04	49.6872	37.7386	2946	segment 28	30TVG-4-4 Line 005	289	3.832	30.371	0.311	51.7	0.018	0.067	14.229	0.005		0.801	0	0.023	101.357	67.1665	0.101166	32.7323			0.523954	Plagioclase in the thin section		30IV-TVG04	49.2	1.224	18.17		0.152	6.17	11.98	2.68	0.2		0.105	-0.01	99.811
	This study	30IV-TVG04	49.6872	37.7386	2946	segment 28	30TVG-4-5	290	1.901	33.279	0.24	47.556	0.008	0	17.529	0		0.352	0	0	100.865	83.557	0.0454046	16.3976	0.702981	9.25611e-05	0.210992	Plagioclase in the thin section		30IV-TVG04	49.2	1.224	18.17		0.152	6.17	11.98	2.68	0.2		0.105	-0.01	99.811
	This study	30IV-TVG04	49.6872	37.7386	2946	segment 28	30TVG-4-6	291	1.707	33.667	0.196	46.954	0.008	0	18.006	0.015		0.343	0.009	0.014	100.919	85.3185	0.0451336	14.6364	0.702993	0.000103816	0.184441	Plagioclase in the thin section		30IV-TVG04	49.2	1.224	18.17		0.152	6.17	11.98	2.68	0.2		0.105	-0.01	99.811
	This study	30IV-TVG04	49.6872	37.7386	2946	segment 28	30TVG-4-7	292	1.673	33.623	0.212	46.93	0.001	0.048	18.141	0		0.332	0.011	0.013	100.984	85.6937	0.00562434	14.3007	0.703016	0.000111999	0.179422	Plagioclase in the thin section		30IV-TVG04	49.2	1.224	18.17		0.152	6.17	11.98	2.68	0.2		0.105	-0.01	99.811
	This study	30IV-TVG04	49.6872	37.7386	2946	segment 28	30TVG-4-8	293	1.996	33.429	0.216	47.447	0.019	0.02	17.69	0		0.365	0.024	0	101.206	82.9562	0.106086	16.9377			0.21952	Plagioclase in the thin section		30IV-TVG04	49.2	1.224	18.17		0.152	6.17	11.98	2.68	0.2		0.105	-0.01	99.811
	This study	30IV-TVG04	49.6872	37.7386	2946	segment 28	30TVG-4-9 Line 001	294	2.026	33.172	0.207	47.587	0	0	17.349	0		0.341	0.014	0.059	100.755	82.5546	0	17.4454			0.227199	Plagioclase in the thin section		30IV-TVG04	49.2	1.224	18.17		0.152	6.17	11.98	2.68	0.2		0.105	-0.01	99.811
	This study	30IV-TVG04	49.6872	37.7386	2946	segment 28	30TVG-4-9 Line 002	295	2.351	32.864	0.293	48.232	0.019	0.019	17.063	0.009		0.37	0	0.008	101.228	79.9582	0.10601	19.9358			0.268064	Plagioclase in the thin section		30IV-TVG04	49.2	1.224	18.17		0.152	6.17	11.98	2.68	0.2		0.105	-0.01	99.811
	This study	30IV-TVG04	49.6872	37.7386	2946	segment 28	30TVG-4-9 Line 003	296	1.722	32.823	0.207	46.043	0	0.002	16.559	0.035		0.325	0.017	0.009	97.742	84.1624	0	15.8376			0.202321	Plagioclase in the thin section		30IV-TVG04	49.2	1.224	18.17		0.152	6.17	11.98	2.68	0.2		0.105	-0.01	99.811
	This study	30IV-TVG04	49.6872	37.7386	2946	segment 28	30TVG-4-9 Line 004	297	1.762	32.516	0.197	45.691	0.01	0.039	16.666	0.046		0.341	0	0	97.268	83.8906	0.059933	16.0495			0.205692	Plagioclase in the thin section		30IV-TVG04	49.2	1.224	18.17		0.152	6.17	11.98	2.68	0.2		0.105	-0.01	99.811
	This study	30IV-TVG04	49.6872	37.7386	2946	segment 28	30TVG-4-9 Line 005	298	1.618	32.768	0.195	45.485	0.016	0.018	16.741	0.02		0.279	0.009	0	97.149	85.0318	0.0967619	14.8714			0.188035	Plagioclase in the thin section		30IV-TVG04	49.2	1.224	18.17		0.152	6.17	11.98	2.68	0.2		0.105	-0.01	99.811
	This study	30IV-TVG04	49.6872	37.7386	2946	segment 28	30TVG-4-9 Line 006	299	1.294	33.331	0.183	44.74	0.007	0.01	17.192	0.005		0.298	0	0	97.06	87.975	0.0426496	11.9823			0.146437	Plagioclase in the thin section		30IV-TVG04	49.2	1.224	18.17		0.152	6.17	11.98	2.68	0.2		0.105	-0.01	99.811
	This study	30IV-TVG04	49.6872	37.7386	2946	segment 28	30TVG-4-9 Line 007	300	1.284	32.055	0.174	43.347	0.017	0	15.842	0.003		0.26	0	0.008	92.99	87.1123	0.111302	12.7764			0.157687	Plagioclase in the thin section		30IV-TVG04	49.2	1.224	18.17		0.152	6.17	11.98	2.68	0.2		0.105	-0.01	99.811
	This study	30IV-TVG04	49.6872	37.7386	2946	segment 28	30TVG-4-9 Line 008	301	1.683	31.72	0.19	43.888	0	0.038	15.429	0.008		0.238	0.011	0	93.205	83.5151	0	16.4849			0.212221	Plagioclase in the thin section		30IV-TVG04	49.2	1.224	18.17		0.152	6.17	11.98	2.68	0.2		0.105	-0.01	99.811
	This study	30IV-TVG04	49.6872	37.7386	2946	segment 28	30TVG-4-9 Line 009	302	1.698	31.255	0.164	43.921	0.005	0.047	15.479	0.041		0.301	0.021	0	92.932	83.4106	0.0320799	16.5573			0.213421	Plagioclase in the thin section		30IV-TVG04	49.2	1.224	18.17		0.152	6.17	11.98	2.68	0.2		0.105	-0.01	99.811
	This study	30IV-TVG04	49.6872	37.7386	2946	segment 28	30TVG-4-9 Line 010	303	1.606	32.891	0.209	45.414	0	0.012	16.791	0		0.3	0.021	0.007	97.251	85.2458	0	14.7542			0.186085	Plagioclase in the thin section		30IV-TVG04	49.2	1.224	18.17		0.152	6.17	11.98	2.68	0.2		0.105	-0.01	99.811
	This study	30IV-TVG04	49.6872	37.7386	2946	segment 28	30TVG-4-9 Line 011	304	1.719	32.86	0.217	45.966	0	0	16.882	0		0.328	0.003	0	97.975	84.4411	0	15.5589			0.198104	Plagioclase in the thin section		30IV-TVG04	49.2	1.224	18.17		0.152	6.17	11.98	2.68	0.2		0.105	-0.01	99.811
	This study	30IV-TVG04	49.6872	37.7386	2946	segment 28	30TVG-4-9 Line 012	305	2.002	32.814	0.222	46.472	0.005	0.027	16.374	0.04		0.321	0	0	98.277	81.859	0.0297622	18.1113			0.237876	Plagioclase in the thin section		30IV-TVG04	49.2	1.224	18.17		0.152	6.17	11.98	2.68	0.2		0.105	-0.01	99.811
	This study	DY30II-1	49.6647	37.8112	2398	segment 28	30II-1-1 Line 001	314	3.87	29.279	0.265	50.556	0.036	0.019	13.518	0.017		0.701	0	0.015	98.276	65.7367	0.20844	34.0549			0.58386	Plagioclase in the thin section		DY30II-1	49.08	1.159	18.68		0.147	6.02	12.14	2.67	0.13		0.102	-0.12	99.688
	This study	DY30II-1	49.6647	37.8112	2398	segment 28	30II-1-1 Line 002	315	2.01	32.322	0.221	46.669	0	0	16.564	0		0.35	0	0.005	98.141	81.9951	0	18.0049			0.24748	Plagioclase in the thin section		DY30II-1	49.08	1.159	18.68		0.147	6.02	12.14	2.67	0.13		0.102	-0.12	99.688
	This study	DY30II-1	49.6647	37.8112	2398	segment 28	30II-1-1 Line 003	316	1.931	32.541	0.201	46.473	0	0	16.968	0		0.292	0.028	0.004	98.438	82.9234	0	17.0766			0.232093	Plagioclase in the thin section		DY30II-1	49.08	1.159	18.68		0.147	6.02	12.14	2.67	0.13		0.102	-0.12	99.688
	This study	DY30II-1	49.6647	37.8112	2398	segment 28	30II-1-1 Line 004	317	1.952	32.25	0.192	46.722	0.006	0	16.608	0		0.288	0.016	0.05	98.084	82.4324	0.0354582	17.5321			0.239702	Plagioclase in the thin section		DY30II-1	49.08	1.159	18.68		0.147	6.02	12.14	2.67	0.13		0.102	-0.12	99.688
	This study	DY30II-1	49.6647	37.8112	2398	segment 28	30II-1-1 Line 005	318	1.596	32.883	0.171	45.988	0	0.003	17.038	0		0.306	0	0	97.985	85.5061	0	14.4939			0.19104	Plagioclase in the thin section		DY30II-1	49.08	1.159	18.68		0.147	6.02	12.14	2.67	0.13		0.102	-0.12	99.688
	This study	DY30II-1	49.6647	37.8112	2398	segment 28	30II-1-1 Line 006	319	3.286	29.918	0.233	48.962	0.027	0.096	14.07	0		0.501	0.023	0	97.116	70.1803	0.16035	29.6594			0.476303	Plagioclase in the thin section		DY30II-1	49.08	1.159	18.68		0.147	6.02	12.14	2.67	0.13		0.102	-0.12	99.688
	This study	DY30II-1	49.6647	37.8112	2398	segment 28	30II-1-1 Line 007	320	4.405	27.857	0.336	51.746	0.009	0.068	12.243	0.048		1.081	0.016	0.028	97.837	60.5345	0.0529836	39.4125			0.733783	Plagioclase in the thin section		DY30II-1	49.08	1.159	18.68		0.147	6.02	12.14	2.67	0.13		0.102	-0.12	99.688
	This study	DY30II-1	49.6647	37.8112	2398	segment 28	30II-1-2C	321	2.03	32.925	0.258	47.727	0	0.059	17.674	0		0.362	0	0.039	101.074	82.7922	0	17.2078			0.234245	Plagioclase in the thin section		DY30II-1	49.08	1.159	18.68		0.147	6.02	12.14	2.67	0.13		0.102	-0.12	99.688
	This study	DY30II-1	49.6647	37.8112	2398	segment 28	30II-1-2R	322	3.928	29.777	0.296	52.351	0.008	0.057	13.938	0.015		0.694	0.005	0.015	101.084	66.1965	0.0452386	33.7582			0.574752	Plagioclase in the thin section		DY30II-1	49.08	1.159	18.68		0.147	6.02	12.14	2.67	0.13		0.102	-0.12	99.688
	This study	DY30II-1	49.6647	37.8112	2398	segment 28	30II-1-3C	323	2.274	32.018	0.267	47.57	0.006	0	16.453	0.014		0.377	0.005	0.052	99.036	79.9656	0.0347211	19.9996			0.281874	Plagioclase in the thin section		DY30II-1	49.08	1.159	18.68		0.147	6.02	12.14	2.67	0.13		0.102	-0.12	99.688
	This study	DY30II-1	49.6647	37.8112	2398	segment 28	30II-1-3R	324	4.073	29.764	0.259	51.626	0.019	0.046	13.995	0		0.685	0.017	0.012	100.496	65.434	0.105771	34.4602			0.593542	Plagioclase in the thin section		DY30II-1	49.08	1.159	18.68		0.147	6.02	12.14	2.67	0.13		0.102	-0.12	99.688
	This study	DY30II-1	49.6647	37.8112	2398	segment 28	30II-1-4	325	1.806	33.279	0.226	47.466	0.028	0.022	17.79	0		0.368	0.011	0.005	101.001	84.3471	0.158065	15.4948			0.207039	Plagioclase in the thin section		DY30II-1	49.08	1.159	18.68		0.147	6.02	12.14	2.67	0.13		0.102	-0.12	99.688
	This study	DY30II-1	49.6647	37.8112	2398	segment 28	30II-1-5	326	1.317	34.091	0.143	46.216	0.011	0	18.618	0		0.243	0.007	0	100.646	88.5969	0.062325	11.3408			0.144266	Plagioclase in the thin section		DY30II-1	49.08	1.159	18.68		0.147	6.02	12.14	2.67	0.13		0.102	-0.12	99.688
	This study	DY30II-1	49.6647	37.8112	2398	segment 28	30II-1-6	327	1.637	33.562	0.231	46.847	0	0.005	17.94	0		0.338	0.005	0.037	100.602	85.8281	0	14.1719			0.186096	Plagioclase in the thin section		DY30II-1	49.08	1.159	18.68		0.147	6.02	12.14	2.67	0.13		0.102	-0.12	99.688
	This study	DY30II-1	49.6647	37.8112	2398	segment 28	30II-1-7C	328	2.097	32.748	0.241	47.776	0.006	0.049	17.189	0		0.387	0	0.01	100.503	81.8883	0.0340335	18.0777			0.248804	Plagioclase in the thin section		DY30II-1	49.08	1.159	18.68		0.147	6.02	12.14	2.67	0.13		0.102	-0.12	99.688
	This study	DY30II-1	49.6647	37.8112	2398	segment 28	30II-1-7R	329	3.905	29.734	0.266	51.933	0.022	0.047	14.201	0		0.558	0.001	0.037	100.704	66.6916	0.123015	33.1854			0.560805	Plagioclase in the thin section		DY30II-1	49.08	1.159	18.68		0.147	6.02	12.14	2.67	0.13		0.102	-0.12	99.688
	This study	DY30II-1	49.6647	37.8112	2398	segment 28	30II-1-8	330	1.709	33.259	0.204	47.19	0	0.007	18.023	0.035		0.307	0.031	0.026	100.791	85.3542	0	14.6458			0.193386	Plagioclase in the thin section		DY30II-1	49.08	1.159	18.68		0.147	6.02	12.14	2.67	0.13		0.102	-0.12	99.688
	This study	DY30II-1	49.6647	37.8112	2398	segment 28	30II-1-9	331	1.604	33.655	0.178	46.622	0.022	0	17.689	0		0.338	0	0.018	100.126	85.7951	0.127047	14.0779			0.184932	Plagioclase in the thin section		DY30II-1	49.08	1.159	18.68		0.147	6.02	12.14	2.67	0.13		0.102	-0.12	99.688
	This study	DY30II-1	49.6647	37.8112	2398	segment 28	30II-1-10 Line 001	332	4.341	28.526	0.41	52.557	0.03	0.039	13.574	0.004		0.95	0	0.003	100.434	63.2377	0.166408	36.5958			0.652216	Plagioclase in the thin section		DY30II-1	49.08	1.159	18.68		0.147	6.02	12.14	2.67	0.13		0.102	-0.12	99.688
	This study	DY30II-1	49.6647	37.8112	2398	segment 28	30II-1-10 Line 002	333	2.112	32.844	0.2	47.338	0.011	0.022	17.344	0.033		0.489	0.023	0	100.416	81.8929	0.0618406	18.0453			0.248344	Plagioclase in the thin section		DY30II-1	49.08	1.159	18.68		0.147	6.02	12.14	2.67	0.13		0.102	-0.12	99.688
	This study	DY30II-1	49.6647	37.8112	2398	segment 28	30II-1-10 Line 003	334	1.608	33.306	0.23	46.934	0	0	17.899	0		0.377	0.034	0	100.388	86.0166	0	13.9834			0.183218	Plagioclase in the thin section		DY30II-1	49.08	1.159	18.68		0.147	6.02	12.14	2.67	0.13		0.102	-0.12	99.688
	This study	DY30II-1	49.6647	37.8112	2398	segment 28	30II-1-10 Line 004	335	2.568	31.966	0.268	48.701	0	0	16.275	0		0.336	0.024	0.023	100.161	77.7891	0	22.2109			0.321798	Plagioclase in the thin section		DY30II-1	49.08	1.159	18.68		0.147	6.02	12.14	2.67	0.13		0.102	-0.12	99.688
	This study	DY30II-1	49.6647	37.8112	2398	segment 28	30II-1-10 Line 005	336	2.755	31.693	0.26	48.976	0.01	0	16.358	0.01		0.389	0.004	0	100.455	76.5994	0.0557544	23.3448			0.34348	Plagioclase in the thin section		DY30II-1	49.08	1.159	18.68		0.147	6.02	12.14	2.67	0.13		0.102	-0.12	99.688
	This study	DY30II-1	49.6647	37.8112	2398	segment 28	30II-1-10 Line 006	337	2.328	32.312	0.267	47.661	0.014	0.034	16.752	0		0.36	0.014	0	99.742	79.8424	0.0794473	20.0781			0.283417	Plagioclase in the thin section		DY30II-1	49.08	1.159	18.68		0.147	6.02	12.14	2.67	0.13		0.102	-0.12	99.688
	This study	DY30II-1	49.6647	37.8112	2398	segment 28	30II-1-10 Line 007	338	2.458	32.128	0.263	48.103	0.041	0.022	16.568	0.007		0.41	0.02	0.01	100.03	78.6528	0.231746	21.1154			0.302567	Plagioclase in the thin section		DY30II-1	49.08	1.159	18.68		0.147	6.02	12.14	2.67	0.13		0.102	-0.12	99.688
	This study	DY30II-1	49.6647	37.8112	2398	segment 28	30II-1-10 Line 008	339	1.579	33.394	0.202	46.8	0	0.027	17.514	0		0.383	0.002	0	99.901	85.9739	0	14.0261			0.183868	Plagioclase in the thin section		DY30II-1	49.08	1.159	18.68		0.147	6.02	12.14	2.67	0.13		0.102	-0.12	99.688
	This study	DY30II-1	49.6647	37.8112	2398	segment 28	30II-1-10 Line 009	340	2.628	31.525	0.257	49.01	0.026	0	16.232	0		0.381	0	0	100.059	77.2273	0.147284	22.6255			0.330189	Plagioclase in the thin section		DY30II-1	49.08	1.159	18.68		0.147	6.02	12.14	2.67	0.13		0.102	-0.12	99.688
	This study	DY30II-1	49.6647	37.8112	2398	segment 28	30II-1-10 Line 010	341	2.511	31.83	0.267	48.626	0.004	0.009	16.526	0.021		0.376	0.008	0.004	100.182	78.4168	0.0225988	21.5606			0.309877	Plagioclase in the thin section		DY30II-1	49.08	1.159	18.68		0.147	6.02	12.14	2.67	0.13		0.102	-0.12	99.688
	This study	DY30II-1	49.6647	37.8112	2398	segment 28	30II-1-10 Line 011	342	2.658	31.65	0.295	48.92	0.014	0.064	16.098	0		0.376	0	0.014	100.089	76.9338	0.0796631	22.9865			0.336739	Plagioclase in the thin section		DY30II-1	49.08	1.159	18.68		0.147	6.02	12.14	2.67	0.13		0.102	-0.12	99.688
	This study	DY30II-1	49.6647	37.8112	2398	segment 28	30II-1-10 Line 012	343	2.572	31.513	0.26	48.623	0.001	0	16.182	0.02		0.383	0.011	0	99.565	77.6585	0.00571401	22.3358			0.324152	Plagioclase in the thin section		DY30II-1	49.08	1.159	18.68		0.147	6.02	12.14	2.67	0.13		0.102	-0.12	99.688
	This study	DY30II-1	49.6647	37.8112	2398	segment 28	30II-1-10 Line 013	344	1.535	33.431	0.226	46.091	0.009	0	17.846	0.02		0.344	0	0.009	99.511	86.4867	0.051932	13.4614			0.175419	Plagioclase in the thin section		DY30II-1	49.08	1.159	18.68		0.147	6.02	12.14	2.67	0.13		0.102	-0.12	99.688
	This study	DY30II-1	49.6647	37.8112	2398	segment 28	30II-1-10 Line 014	345	2.742	31.499	0.268	49.244	0.009	0.014	16.004	0.033		0.357	0.02	0.009	100.199	76.2948	0.0510849	23.6541			0.349421	Plagioclase in the thin section		DY30II-1	49.08	1.159	18.68		0.147	6.02	12.14	2.67	0.13		0.102	-0.12	99.688
	This study	DY30II-1	49.6647	37.8112	2398	segment 28	30II-1-10 Line 015	346	2.629	31.489	0.283	48.593	0.006	0.016	16.17	0.022		0.377	0.001	0.002	99.588	77.241	0.034125	22.7249			0.331582	Plagioclase in the thin section		DY30II-1	49.08	1.159	18.68		0.147	6.02	12.14	2.67	0.13		0.102	-0.12	99.688
	This study	DY30II-1	49.6647	37.8112	2398	segment 28	30II-1-10 Line 016	347	2.581	31.697	0.267	48.574	0	0.06	15.92	0.015		0.37	0.004	0	99.488	77.3173	0	22.6827			0.33064	Plagioclase in the thin section		DY30II-1	49.08	1.159	18.68		0.147	6.02	12.14	2.67	0.13		0.102	-0.12	99.688
	This study	DY30II-1	49.6647	37.8112	2398	segment 28	30II-1-10 Line 017	348	2.385	31.785	0.248	48.58	0.016	0.034	16.458	0		0.385	0.027	0	99.918	79.1522	0.0916199	20.7562			0.295543	Plagioclase in the thin section		DY30II-1	49.08	1.159	18.68		0.147	6.02	12.14	2.67	0.13		0.102	-0.12	99.688
	This study	DY30II-1	49.6647	37.8112	2398	segment 28	30II-1-10 Line 018	349	2.047	32.446	0.23	47.478	0.009	0.003	17.042	0		0.388	0	0	99.643	82.1029	0.0516255	17.8455			0.244967	Plagioclase in the thin section		DY30II-1	49.08	1.159	18.68		0.147	6.02	12.14	2.67	0.13		0.102	-0.12	99.688
	This study	DY30II-1	49.6647	37.8112	2398	segment 28	30II-1-10 Line 019	350	2.2	32.329	0.216	47.332	0.013	0	16.537	0.027		0.268	0	0.02	98.942	80.5366	0.0753814	19.388			0.271316	Plagioclase in the thin section		DY30II-1	49.08	1.159	18.68		0.147	6.02	12.14	2.67	0.13		0.102	-0.12	99.688
	This study	DY30II-1	49.6647	37.8112	2398	segment 28	30II-1-10 Line 020	351	4.426	28.937	0.29	51.969	0.034	0.095	13.118	0		0.684	0.015	0	99.568	61.9721	0.191246	37.8367			0.688103	Plagioclase in the thin section		DY30II-1	49.08	1.159	18.68		0.147	6.02	12.14	2.67	0.13		0.102	-0.12	99.688
	This study	DY30II-1	49.6647	37.8112	2398	segment 28	30II-1-11 Line 021 Line 001	352	4.105	29.102	0.284	51.62	0.018	0.057	13.229	0		0.628	0	0.021	99.064	63.9741	0.103642	35.9223			0.632843	Plagioclase in the thin section		DY30II-1	49.08	1.159	18.68		0.147	6.02	12.14	2.67	0.13		0.102	-0.12	99.688
	This study	DY30II-1	49.6647	37.8112	2398	segment 28	30II-1-11 Line 021 Line 002	353	1.79	33.064	0.225	46.525	0.006	0.014	17.534	0.011		0.391	0	0.026	99.586	84.3782	0.0343783	15.5875			0.208201	Plagioclase in the thin section		DY30II-1	49.08	1.159	18.68		0.147	6.02	12.14	2.67	0.13		0.102	-0.12	99.688
	This study	DY30II-1	49.6647	37.8112	2398	segment 28	30II-1-11 Line 021 Line 003	354	2.72	31.122	0.281	48.569	0.003	0.018	16.221	0.027		0.362	0	0.005	99.328	76.7074	0.0168914	23.2757			0.34198	Plagioclase in the thin section		DY30II-1	49.08	1.159	18.68		0.147	6.02	12.14	2.67	0.13		0.102	-0.12	99.688
	This study	DY30II-1	49.6647	37.8112	2398	segment 28	30II-1-11 Line 021 Line 004	355	2.637	30.991	0.261	49.223	0.009	0.024	15.779	0		0.35	0	0	99.274	76.7404	0.052116	23.2075			0.340832	Plagioclase in the thin section		DY30II-1	49.08	1.159	18.68		0.147	6.02	12.14	2.67	0.13		0.102	-0.12	99.688
	This study	DY30II-1	49.6647	37.8112	2398	segment 28	30II-1-11 Line 021 Line 005	356	2.305	31.912	0.253	47.609	0	0	16.374	0		0.374	0.014	0.016	98.857	79.6981	0	20.3019			0.287095	Plagioclase in the thin section		DY30II-1	49.08	1.159	18.68		0.147	6.02	12.14	2.67	0.13		0.102	-0.12	99.688
	This study	DY30II-1	49.6647	37.8112	2398	segment 28	30II-1-11 Line 021 Line 006	357	4.145	28.41	0.364	51.573	0.02	0.039	13.271	0		0.93	0.014	0	98.766	63.8169	0.114511	36.0686			0.636987	Plagioclase in the thin section		DY30II-1	49.08	1.159	18.68		0.147	6.02	12.14	2.67	0.13		0.102	-0.12	99.688
	This study	DY30II-1	49.6647	37.8112	2398	segment 28	30II-1-12 Line 001	358	2.617	31.393	0.299	48.511	0.01	0	16.01	0		0.318	0	0.037	99.195	77.1286	0.0573599	22.814			0.333367	Plagioclase in the thin section		DY30II-1	49.08	1.159	18.68		0.147	6.02	12.14	2.67	0.13		0.102	-0.12	99.688
	This study	DY30II-1	49.6647	37.8112	2398	segment 28	30II-1-12 Line 002	359	1.66	32.827	0.231	46.164	0.02	0	17.663	0		0.373	0.013	0	98.951	85.3669	0.11509	14.518			0.19167	Plagioclase in the thin section		DY30II-1	49.08	1.159	18.68		0.147	6.02	12.14	2.67	0.13		0.102	-0.12	99.688
	This study	DY30II-1	49.6647	37.8112	2398	segment 28	30II-1-12 Line 003	360	2.72	31.311	0.302	48.942	0.026	0.034	15.75	0.011		0.403	0	0.019	99.518	76.0761	0.149529	23.7744			0.352207	Plagioclase in the thin section		DY30II-1	49.08	1.159	18.68		0.147	6.02	12.14	2.67	0.13		0.102	-0.12	99.688
	This study	DY30II-1	49.6647	37.8112	2398	segment 28	30II-1-12 Line 004	361	2.173	32.151	0.284	47.739	0.002	0.005	16.613	0.002		0.395	0	0.004	99.368	80.8515	0.0115892	19.137			0.26676	Plagioclase in the thin section		DY30II-1	49.08	1.159	18.68		0.147	6.02	12.14	2.67	0.13		0.102	-0.12	99.688
	This study	DY30II-1	49.6647	37.8112	2398	segment 28	30II-1-12 Line 005	362	3.558	29.534	0.379	50.791	0.024	0.011	14.364	0.003		0.615	0	0	99.279	68.9549	0.137178	30.9079			0.505173	Plagioclase in the thin section		DY30II-1	49.08	1.159	18.68		0.147	6.02	12.14	2.67	0.13		0.102	-0.12	99.688
	This study	DY30II-1	49.6647	37.8112	2398	segment 28	30II-1-12 Line 006	363	2.263	31.803	0.263	47.548	0.011	0	16.732	0		0.341	0	0	98.961	80.2874	0.0628458	19.6498			0.275833	Plagioclase in the thin section		DY30II-1	49.08	1.159	18.68		0.147	6.02	12.14	2.67	0.13		0.102	-0.12	99.688
	This study	DY30II-1	49.6647	37.8112	2398	segment 28	30II-1-12 Line 007	364	1.54	33.213	0.212	46.005	0.004	0.027	17.846	0.001		0.362	0	0	99.21	86.4737	0.0230774	13.5032			0.175991	Plagioclase in the thin section		DY30II-1	49.08	1.159	18.68		0.147	6.02	12.14	2.67	0.13		0.102	-0.12	99.688
	This study	DY30II-1	49.6647	37.8112	2398	segment 28	30II-1-12 Line 008	365	1.56	33.117	0.209	45.606	0	0.019	17.776	0.013		0.331	0.036	0	98.667	86.2958	0	13.7042			0.178978	Plagioclase in the thin section		DY30II-1	49.08	1.159	18.68		0.147	6.02	12.14	2.67	0.13		0.102	-0.12	99.688
	This study	DY30II-1	49.6647	37.8112	2398	segment 28	30II-1-12 Line 009	366	2.498	31.475	0.243	48.378	0.04	0	16.137	0		0.386	0	0.001	99.158	77.938	0.230023	21.8319			0.315704	Plagioclase in the thin section		DY30II-1	49.08	1.159	18.68		0.147	6.02	12.14	2.67	0.13		0.102	-0.12	99.688
	This study	DY30II-1	49.6647	37.8112	2398	segment 28	30II-1-12 Line 010	367	1.986	32.011	0.235	46.977	0.029	0	17.033	0.016		0.33	0	0.024	98.641	82.4391	0.167118	17.3938			0.237792	Plagioclase in the thin section		DY30II-1	49.08	1.159	18.68		0.147	6.02	12.14	2.67	0.13		0.102	-0.12	99.688
	This study	DY30II-1	49.6647	37.8112	2398	segment 28	30II-1-12 Line 011	368	3.723	29.008	0.301	50.907	0.018	0.078	13.995	0		0.77	0	0.011	98.811	67.4346	0.103268	32.4621			0.542538	Plagioclase in the thin section		DY30II-1	49.08	1.159	18.68		0.147	6.02	12.14	2.67	0.13		0.102	-0.12	99.688
	This study	DY30II-1	49.6647	37.8112	2398	segment 28	30II-1-13 Line 001	369	4.078	28.184	0.404	51.805	0.026	0.042	13.696	0.004		0.801	0	0.015	99.055	64.8904	0.146671	34.9629			0.607244	Plagioclase in the thin section		DY30II-1	49.08	1.159	18.68		0.147	6.02	12.14	2.67	0.13		0.102	-0.12	99.688
	This study	DY30II-1	49.6647	37.8112	2398	segment 28	30II-1-13 Line 002	370	1.54	33.05	0.196	46.035	0.003	0.031	17.463	0.042		0.372	0.007	0	98.739	86.223	0.0176364	13.7594			0.179851	Plagioclase in the thin section		DY30II-1	49.08	1.159	18.68		0.147	6.02	12.14	2.67	0.13		0.102	-0.12	99.688
	This study	DY30II-1	49.6647	37.8112	2398	segment 28	30II-1-13 Line 003	371	1.445	33.064	0.201	45.853	0	0.019	18.092	0.019		0.298	0.015	0.027	99.033	87.3722	0	12.6278			0.162889	Plagioclase in the thin section		DY30II-1	49.08	1.159	18.68		0.147	6.02	12.14	2.67	0.13		0.102	-0.12	99.688
	This study	DY30II-1	49.6647	37.8112	2398	segment 28	30II-1-13 Line 004	372	2.616	31.277	0.29	48.75	0	0	16.024	0		0.395	0.026	0.007	99.385	77.195	0	22.805			0.332948	Plagioclase in the thin section		DY30II-1	49.08	1.159	18.68		0.147	6.02	12.14	2.67	0.13		0.102	-0.12	99.688
	This study	DY30II-1	49.6647	37.8112	2398	segment 28	30II-1-13 Line 005	373	2.388	31.606	0.24	48.195	0	0	16.564	0.004		0.359	0.016	0.006	99.378	79.3096	0	20.6904			0.294021	Plagioclase in the thin section		DY30II-1	49.08	1.159	18.68		0.147	6.02	12.14	2.67	0.13		0.102	-0.12	99.688
	This study	DY30II-1	49.6647	37.8112	2398	segment 28	30II-1-13 Line 006	374	1.492	33.233	0.193	45.935	0.014	0	18	0.011		0.339	0.047	0	99.264	86.8871	0.0804628	13.0324			0.169046	Plagioclase in the thin section		DY30II-1	49.08	1.159	18.68		0.147	6.02	12.14	2.67	0.13		0.102	-0.12	99.688
	This study	DY30II-1	49.6647	37.8112	2398	segment 28	30II-1-13 Line 007	375	2.286	32.067	0.273	47.842	0	0	16.671	0		0.377	0	0	99.516	80.1195	0	19.8805			0.279656	Plagioclase in the thin section		DY30II-1	49.08	1.159	18.68		0.147	6.02	12.14	2.67	0.13		0.102	-0.12	99.688
	This study	DY30II-1	49.6647	37.8112	2398	segment 28	30II-1-13 Line 008	376	3.384	29.872	0.288	50.664	0.021	0.048	14.508	0.027		0.718	0.028	0.001	99.559	70.2343	0.121045	29.6446			0.475699	Plagioclase in the thin section		DY30II-1	49.08	1.159	18.68		0.147	6.02	12.14	2.67	0.13		0.102	-0.12	99.688
	This study	DY30II-1	49.6647	37.8112	2398	segment 28	30II-1-13 Line 009	377	1.918	32.6	0.21	46.711	0.018	0.046	17.194	0.008		0.363	0	0	99.068	83.1183	0.103604	16.7781			0.2275	Plagioclase in the thin section		DY30II-1	49.08	1.159	18.68		0.147	6.02	12.14	2.67	0.13		0.102	-0.12	99.688
	This study	DY30II-1	49.6647	37.8112	2398	segment 28	30II-1-13 Line 010	378	3.531	29.816	0.268	50.226	0.042	0.044	14.384	0.006		0.712	0.001	0.002	99.032	69.0756	0.240148	30.6843			0.500643	Plagioclase in the thin section		DY30II-1	49.08	1.159	18.68		0.147	6.02	12.14	2.67	0.13		0.102	-0.12	99.688
	This study	30I-TVG02-1	63.9358	27.849	2958	Mountain Jourdanne	30I-2-1-1	191	3.758	30.283	0.177	50.92	0.041	0	14.075	0.057		0.292	0.023	0.013	99.639	67.2668	0.233303	32.4999	0.702651	5.83735e-05	0.355007	Plagioclase in the thin section		30I-TVG02-1	51.02	0.988	19.62		0.108	5.58	11.09	3.78	0.2		0.118	0.55	99.664
	This study	30I-TVG02-1	63.9358	27.849	2958	Mountain Jourdanne	30I-2-1-2	193	3.37	30.318	0.174	50.714	0.052	0.043	14.221	0		0.303	0	0.03	99.225	69.7753	0.30378	29.9209	0.702662	5.32921e-05	0.315085	Plagioclase in the thin section		30I-TVG02-1	51.02	0.988	19.62		0.108	5.58	11.09	3.78	0.2		0.118	0.55	99.664
	This study	30I-TVG02-1	63.9358	27.849	2958	Mountain Jourdanne	30I-2-1-3 Line 001	196	3.966	29.691	0.186	50.96	0.042	0.042	13.615	0.033		0.56	0.001	0.008	99.104	65.3257	0.239938	34.4344	0.702698	6.27821e-05	0.387314	Plagioclase in the thin section		30I-TVG02-1	51.02	0.988	19.62		0.108	5.58	11.09	3.78	0.2		0.118	0.55	99.664
	This study	30I-TVG02-1	63.9358	27.849	2958	Mountain Jourdanne	30I-2-1-3 Line 002	197	4.378	29.429	0.187	51.958	0.052	0.094	13.116	0		0.365	0	0.005	99.584	62.1606	0.293428	37.546			0.443816	Plagioclase in the thin section		30I-TVG02-1	51.02	0.988	19.62		0.108	5.58	11.09	3.78	0.2		0.118	0.55	99.664
	This study	30I-TVG02-1	63.9358	27.849	2958	Mountain Jourdanne	30I-2-1-3 Line 003	198	3.45	30.761	0.144	49.822	0.034	0.023	14.806	0.008		0.382	0	0	99.43	70.2057	0.191954	29.6024			0.30982	Plagioclase in the thin section		30I-TVG02-1	51.02	0.988	19.62		0.108	5.58	11.09	3.78	0.2		0.118	0.55	99.664
	This study	30I-TVG02-1	63.9358	27.849	2958	Mountain Jourdanne	30I-2-1-3 Line 004	199	2.664	31.806	0.155	48.305	0.017	0.015	15.748	0		0.323	0.018	0	99.051	76.4878	0.0983104	23.4139			0.224925	Plagioclase in the thin section		30I-TVG02-1	51.02	0.988	19.62		0.108	5.58	11.09	3.78	0.2		0.118	0.55	99.664
	This study	30I-TVG02-1	63.9358	27.849	2958	Mountain Jourdanne	30I-2-1-3 Line 005	200	4.281	29.471	0.185	51.813	0.033	0.03	13.297	0		0.326	0.018	0	99.454	63.0697	0.186365	36.7439	0.702807	7.11273e-05	0.428075	Plagioclase in the thin section		30I-TVG02-1	51.02	0.988	19.62		0.108	5.58	11.09	3.78	0.2		0.118	0.55	99.664
	This study	30I-TVG02-1	63.9358	27.849	2958	Mountain Jourdanne	30I-2-1-3 Line 006	201	2.557	32.098	0.121	47.736	0.035	0.022	16.18	0		0.331	0	0	99.08	77.6067	0.199882	22.1934			0.210126	Plagioclase in the thin section		30I-TVG02-1	51.02	0.988	19.62		0.108	5.58	11.09	3.78	0.2		0.118	0.55	99.664
	This study	30I-TVG02-1	63.9358	27.849	2958	Mountain Jourdanne	30I-2-1-3 Line 007	202	4.102	29.345	0.191	51.971	0.056	0.003	13.241	0.021		0.366	0	0.008	99.304	63.8721	0.321634	35.8063			0.411911	Plagioclase in the thin section		30I-TVG02-1	51.02	0.988	19.62		0.108	5.58	11.09	3.78	0.2		0.118	0.55	99.664
	This study	30I-TVG02-1	63.9358	27.849	2958	Mountain Jourdanne	30I-2-1-3 Line 008	203	3.764	30.271	0.182	50.611	0.026	0	14.233	0.008		0.399	0.006	0.012	99.512	67.5345	0.146888	32.3186	0.702724	8.46992e-05	0.351626	Plagioclase in the thin section		30I-TVG02-1	51.02	0.988	19.62		0.108	5.58	11.09	3.78	0.2		0.118	0.55	99.664
	This study	30I-TVG02-1	63.9358	27.849	2958	Mountain Jourdanne	30I-2-1-3 Line 009	204	4.059	29.882	0.198	51.27	0.043	0.021	13.497	0.026		0.346	0	0.01	99.352	64.5999	0.245046	35.155			0.399862	Plagioclase in the thin section		30I-TVG02-1	51.02	0.988	19.62		0.108	5.58	11.09	3.78	0.2		0.118	0.55	99.664
	This study	30I-TVG02-1	63.9358	27.849	2958	Mountain Jourdanne	30I-2-1-3 Line 010	205	4.089	29.999	0.185	51.498	0.039	0.004	13.739	0		0.336	0.054	0	99.943	64.8533	0.219193	34.9275	0.702604	8.27031e-05	0.395722	Plagioclase in the thin section		30I-TVG02-1	51.02	0.988	19.62		0.108	5.58	11.09	3.78	0.2		0.118	0.55	99.664
	This study	30I-TVG02-1	63.9358	27.849	2958	Mountain Jourdanne	30I-2-1-3 Line 011	206	3.927	29.984	0.172	51.129	0.05	0.014	13.682	0.017		0.359	0.006	0	99.34	65.6284	0.285559	34.086			0.381628	Plagioclase in the thin section		30I-TVG02-1	51.02	0.988	19.62		0.108	5.58	11.09	3.78	0.2		0.118	0.55	99.664
	This study	30I-TVG02-1	63.9358	27.849	2958	Mountain Jourdanne	30I-2-1-3 Line 012	207	2.678	32.139	0.14	48.278	0.037	0	15.888	0.012		0.314	0	0.029	99.515	76.4653	0.212022	23.3227	0.702788	8.432e-05	0.224114	Plagioclase in the thin section		30I-TVG02-1	51.02	0.988	19.62		0.108	5.58	11.09	3.78	0.2		0.118	0.55	99.664
	This study	30I-TVG02-1	63.9358	27.849	2958	Mountain Jourdanne	30I-2-1-3 Line 013	208	3.368	31.038	0.146	49.839	0.036	0.06	15.016	0		0.33	0.012	0.023	99.868	70.986	0.202631	28.8114			0.298226	Plagioclase in the thin section		30I-TVG02-1	51.02	0.988	19.62		0.108	5.58	11.09	3.78	0.2		0.118	0.55	99.664
	This study	30I-TVG02-1	63.9358	27.849	2958	Mountain Jourdanne	30I-2-1-3 Line 014	209	2.817	32.163	0.142	49.04	0.016	0	16.01	0		0.303	0.015	0.01	100.516	75.7813	0.0901726	24.1285	0.703094	6.88654e-05	0.23395	Plagioclase in the thin section		30I-TVG02-1	51.02	0.988	19.62		0.108	5.58	11.09	3.78	0.2		0.118	0.55	99.664
	This study	30I-TVG02-1	63.9358	27.849	2958	Mountain Jourdanne	30I-2-1-3 Line 015	210	3.644	30.682	0.181	50.566	0.055	0.032	14.05	0		0.325	0.021	0.017	99.573	67.8432	0.316211	31.8406			0.34485	Plagioclase in the thin section		30I-TVG02-1	51.02	0.988	19.62		0.108	5.58	11.09	3.78	0.2		0.118	0.55	99.664
	This study	30I-TVG02-1	63.9358	27.849	2958	Mountain Jourdanne	30I-2-1-3 Line 016	211	5.01	28.601	0.209	53.237	0.046	0.002	12.16	0		0.351	0.008	0	99.624	57.141	0.257369	42.6016			0.547813	Plagioclase in the thin section		30I-TVG02-1	51.02	0.988	19.62		0.108	5.58	11.09	3.78	0.2		0.118	0.55	99.664
	This study	30I-TVG02-1	63.9358	27.849	2958	Mountain Jourdanne	30I-2-1-3 Line 017	212	3.693	30.208	0.202	51.103	0.05	0.019	14.188	0.034		0.384	0	0	99.881	67.7871	0.284433	31.9285	0.702678	8.8917e-05	0.346088	Plagioclase in the thin section		30I-TVG02-1	51.02	0.988	19.62		0.108	5.58	11.09	3.78	0.2		0.118	0.55	99.664
	This study	30I-TVG02-1	63.9358	27.849	2958	Mountain Jourdanne	30I-2-1-4-2	216	4.087	29.67	0.194	51.429	0.055	0	13.596	0		0.43	0	0.028	99.489	64.5671	0.31099	35.1219	0.702557	5.96181e-05	0.399689	Plagioclase in the thin section		30I-TVG02-1	51.02	0.988	19.62		0.108	5.58	11.09	3.78	0.2		0.118	0.55	99.664
	This study	30I-TVG02-1	63.9358	27.849	2958	Mountain Jourdanne	30I-2-1-7	219	4.32	29.454	0.208	51.869	0.032	0.069	13.263	0		0.3	0	0	99.515	62.803	0.180415	37.0166			0.433082	Plagioclase in the thin section		30I-TVG02-1	51.02	0.988	19.62		0.108	5.58	11.09	3.78	0.2		0.118	0.55	99.664
	This study	30I-TVG02-1	63.9358	27.849	2958	Mountain Jourdanne	30I-2-1-8	220	3.777	30.346	0.177	50.914	0.049	0.028	14.089	0.044		0.292	0.013	0.027	99.756	67.1478	0.278056	32.5741			0.356447	Plagioclase in the thin section		30I-TVG02-1	51.02	0.988	19.62		0.108	5.58	11.09	3.78	0.2		0.118	0.55	99.664
	This study	30I-TVG02-1	63.9358	27.849	2958	Mountain Jourdanne	30I-2-1-10	222	4.541	29.12	0.197	52.492	0.048	0.083	12.753	0		0.323	0	0	99.557	60.6495	0.271794	39.0787			0.473443	Plagioclase in the thin section		30I-TVG02-1	51.02	0.988	19.62		0.108	5.58	11.09	3.78	0.2		0.118	0.55	99.664
	This study	30I-TVG02-1	63.9358	27.849	2958	Mountain Jourdanne	30I-2-1-11	223	4.072	29.865	0.173	51.764	0.03	0.097	13.465	0.019		0.315	0.006	0	99.806	64.5207	0.171158	35.3081			0.402096	Plagioclase in the thin section		30I-TVG02-1	51.02	0.988	19.62		0.108	5.58	11.09	3.78	0.2		0.118	0.55	99.664
	This study	30I-TVG02-1	63.9358	27.849	2958	Mountain Jourdanne	30I-2-1-12	225	3.877	30.236	0.203	51.051	0.036	0.052	14.162	0		0.325	0	0.032	99.974	66.7372	0.20199	33.0608			0.363999	Plagioclase in the thin section		30I-TVG02-1	51.02	0.988	19.62		0.108	5.58	11.09	3.78	0.2		0.118	0.55	99.664
	This study	30I-TVG02-1	63.9358	27.849	2958	Mountain Jourdanne	30I-2-1-13	227	3.854	30.255	0.189	51.031	0.032	0.051	14.204	0		0.351	0.007	0	99.974	66.949	0.179584	32.8714	0.702749	9.47813e-05	0.360769	Plagioclase in the thin section		30I-TVG02-1	51.02	0.988	19.62		0.108	5.58	11.09	3.78	0.2		0.118	0.55	99.664
	This study	30I-TVG02-1	63.9358	27.849	2958	Mountain Jourdanne	30I-2-1-15	233	3.719	30.413	0.191	50.968	0.031	0.025	14.166	0		0.308	0.017	0	99.838	67.6741	0.176328	32.1496			0.349066	Plagioclase in the thin section		30I-TVG02-1	51.02	0.988	19.62		0.108	5.58	11.09	3.78	0.2		0.118	0.55	99.664
	This study	30I-TVG02-1	63.9358	27.849	2958	Mountain Jourdanne	30I-2-1-16	234	4.109	30.116	0.22	51.672	0.027	0.038	13.881	0.056		0.312	0	0.016	100.447	65.0205	0.150584	34.8289			0.39359	Plagioclase in the thin section		30I-TVG02-1	51.02	0.988	19.62		0.108	5.58	11.09	3.78	0.2		0.118	0.55	99.664
	This study	30I-TVG02-1	63.9358	27.849	2958	Mountain Jourdanne	30I-2-1-16 Line 001	239	3.882	30.587	0.218	51.272	0.031	0.02	14.146	0.015		0.356	0	0.004	100.531	66.7024	0.174042	33.1235			0.36488	Plagioclase in the thin section		30I-TVG02-1	51.02	0.988	19.62		0.108	5.58	11.09	3.78	0.2		0.118	0.55	99.664
	This study	30I-TVG02-1	63.9358	27.849	2958	Mountain Jourdanne	30I-2-1-16 Line 002	240	4.047	30.156	0.228	51.862	0.019	0.01	13.769	0		0.308	0.029	0.013	100.441	65.2098	0.107139	34.683	0.702726	9.25927e-05	0.390804	Plagioclase in the thin section		30I-TVG02-1	51.02	0.988	19.62		0.108	5.58	11.09	3.78	0.2		0.118	0.55	99.664
	This study	30I-TVG02-1	63.9358	27.849	2958	Mountain Jourdanne	30I-2-1-16 Line 003	241	3.82	30.503	0.212	51.404	0.042	0	14.238	0		0.299	0.011	0	100.529	67.1587	0.235878	32.6054			0.356733	Plagioclase in the thin section		30I-TVG02-1	51.02	0.988	19.62		0.108	5.58	11.09	3.78	0.2		0.118	0.55	99.664
	This study	30I-TVG02-1	63.9358	27.849	2958	Mountain Jourdanne	30I-2-1-16 Line 004	242	3.951	30.6	0.205	51.465	0.006	0.023	14.008	0.005		0.304	0.008	0.023	100.598	66.1856	0.0337538	33.7806	0.702643	7.53864e-05	0.375024	Plagioclase in the thin section		30I-TVG02-1	51.02	0.988	19.62		0.108	5.58	11.09	3.78	0.2		0.118	0.55	99.664
	This study	30I-TVG02-1	63.9358	27.849	2958	Mountain Jourdanne	30I-2-1-16 Line 005	243	3.547	30.912	0.191	50.774	0.037	0.076	14.808	0.016		0.309	0	0	100.67	69.6173	0.207113	30.1756			0.318488	Plagioclase in the thin section		30I-TVG02-1	51.02	0.988	19.62		0.108	5.58	11.09	3.78	0.2		0.118	0.55	99.664
	This study	30I-TVG02-1	63.9358	27.849	2958	Mountain Jourdanne	30I-2-1-16 Line 006	244	4.366	30.058	0.212	52.091	0.047	0	13.707	0		0.306	0	0.007	100.794	63.2723	0.258317	36.4694	0.70276	0.000128261	0.423516	Plagioclase in the thin section		30I-TVG02-1	51.02	0.988	19.62		0.108	5.58	11.09	3.78	0.2		0.118	0.55	99.664
	This study	30I-TVG02-1	63.9358	27.849	2958	Mountain Jourdanne	30I-2-1-16 Line 007	245	4.017	30.701	0.233	51.562	0.009	0.056	13.974	0.044		0.319	0.021	0.025	100.961	65.7485	0.0504187	34.2011	0.702721	0.00011893	0.382217	Plagioclase in the thin section		30I-TVG02-1	51.02	0.988	19.62		0.108	5.58	11.09	3.78	0.2		0.118	0.55	99.664
	This study	30I-TVG02-1	63.9358	27.849	2958	Mountain Jourdanne	30I-2-1-16 Line 008	246	3.25	31.517	0.209	49.924	0.013	0	15.257	0		0.287	0	0	100.457	72.125	0.0731719	27.8018	0.702508	0.000115083	0.283232	Plagioclase in the thin section		30I-TVG02-1	51.02	0.988	19.62		0.108	5.58	11.09	3.78	0.2		0.118	0.55	99.664
	This study	30I-TVG02-1	63.9358	27.849	2958	Mountain Jourdanne	30I-2-1-16 Line 009	247	4.181	30.084	0.199	52.402	0.029	0.052	13.622	0		0.287	0	0.014	100.87	64.1872	0.162701	35.6501	0.702557	6.50797e-05	0.408101	Plagioclase in the thin section		30I-TVG02-1	51.02	0.988	19.62		0.108	5.58	11.09	3.78	0.2		0.118	0.55	99.664
	This study	30I-TVG02-1	63.9358	27.849	2958	Mountain Jourdanne	30I-2-1-17	248	3.823	30.429	0.215	51.379	0.053	0.024	14.004	0.037		0.258	0.018	0	100.24	66.7332	0.300711	32.9661	0.702742	6.17783e-05	0.362978	Plagioclase in the thin section		30I-TVG02-1	51.02	0.988	19.62		0.108	5.58	11.09	3.78	0.2		0.118	0.55	99.664
	This study	30I-TVG02-1	63.9358	27.849	2958	Mountain Jourdanne	30I-2-1-18	250	3.716	30.722	0.202	50.88	0.009	0.022	14.485	0.042		0.352	0.015	0.001	100.446	68.2609	0.0504987	31.6886	0.702758	6.83703e-05	0.341103	Plagioclase in the thin section		30I-TVG02-1	51.02	0.988	19.62		0.108	5.58	11.09	3.78	0.2		0.118	0.55	99.664
	This study	30I-TVG02-1	63.9358	27.849	2958	Mountain Jourdanne	30I-2-1-19	251	3.998	30.377	0.203	51.623	0.027	0.024	14.145	0.01		0.366	0	0.021	100.794	66.0618	0.15014	33.7881			0.37581	Plagioclase in the thin section		30I-TVG02-1	51.02	0.988	19.62		0.108	5.58	11.09	3.78	0.2		0.118	0.55	99.664
	This study	30I-TVG02-1	63.9358	27.849	2958	Mountain Jourdanne	30I-2-1-20	252	3.867	30.6	0.193	51.326	0.027	0.072	13.777	0		0.289	0.022	0.029	100.202	66.2142	0.154506	33.6313	0.702659	7.68436e-05	0.373205	Plagioclase in the thin section		30I-TVG02-1	51.02	0.988	19.62		0.108	5.58	11.09	3.78	0.2		0.118	0.55	99.664
	This study	30I-TVG02-1	63.9358	27.849	2958	Mountain Jourdanne	30I-2-1-21	253	3.941	30.629	0.193	51.087	0.04	0.023	14.296	0.018		0.308	0	0	100.535	66.5701	0.221773	33.2081	0.702725	6.80992e-05	0.366539	Plagioclase in the thin section		30I-TVG02-1	51.02	0.988	19.62		0.108	5.58	11.09	3.78	0.2		0.118	0.55	99.664
	This study	30I-TVG02-1	63.9358	27.849	2958	Mountain Jourdanne	30I-2-1-22	254	4.003	30.647	0.184	51.623	0.059	0.012	14.067	0		0.262	0	0.018	100.875	65.7923	0.328556	33.8792			0.378366	Plagioclase in the thin section		30I-TVG02-1	51.02	0.988	19.62		0.108	5.58	11.09	3.78	0.2		0.118	0.55	99.664
	This study	30I-TVG02-1	63.9358	27.849	2958	Mountain Jourdanne	30I-2-1-27PL	263	3.785	30.111	0.223	50.686	0.052	0.033	13.999	0.027		0.486	0	0.186	99.588	66.9485	0.296095	32.7554			0.359499	Plagioclase in the thin section		30I-TVG02-1	51.02	0.988	19.62		0.108	5.58	11.09	3.78	0.2		0.118	0.55	99.664
	This study	30I-TVG02-1	63.9358	27.849	2958	Mountain Jourdanne	30I-2-1-1 Line 001	264	3.76	30.516	0.163	50.787	0.045	0.006	14.197	0		0.355	0.009	0.005	99.843	67.4297	0.254478	32.3159	0.702632	6.77137e-05	0.352143	Plagioclase in the thin section		30I-TVG02-1	51.02	0.988	19.62		0.108	5.58	11.09	3.78	0.2		0.118	0.55	99.664
	This study	30I-TVG02-1	63.9358	27.849	2958	Mountain Jourdanne	30I-2-1-1 Line 002	265	3.637	30.712	0.173	50.307	0.022	0.04	14.541	0.013		0.307	0	0.002	99.754	68.7564	0.123858	31.1197	0.702436	6.40547e-05	0.332566	Plagioclase in the thin section		30I-TVG02-1	51.02	0.988	19.62		0.108	5.58	11.09	3.78	0.2		0.118	0.55	99.664
	This study	30I-TVG02-1	63.9358	27.849	2958	Mountain Jourdanne	30I-2-1-1 Line 003	266	3.501	30.493	0.178	50.278	0.034	0	14.55	0		0.291	0.006	0.002	99.333	69.5315	0.193456	30.275			0.319932	Plagioclase in the thin section		30I-TVG02-1	51.02	0.988	19.62		0.108	5.58	11.09	3.78	0.2		0.118	0.55	99.664
	This study	30I-TVG02-1	63.9358	27.849	2958	Mountain Jourdanne	30I-2-1-1 Line 004	267	4.04	30.261	0.177	51.365	0.056	0.001	13.709	0.015		0.323	0	0.009	99.956	65.0138	0.316207	34.67			0.391836	Plagioclase in the thin section		30I-TVG02-1	51.02	0.988	19.62		0.108	5.58	11.09	3.78	0.2		0.118	0.55	99.664
	This study	30I-TVG02-1	63.9358	27.849	2958	Mountain Jourdanne	30I-2-1-1 Line 005	268	4.079	29.873	0.177	51.615	0.037	0.037	13.445	0.024		0.359	0	0	99.646	64.4218	0.211085	35.3671	0.702489	6.16896e-05	0.403386	Plagioclase in the thin section		30I-TVG02-1	51.02	0.988	19.62		0.108	5.58	11.09	3.78	0.2		0.118	0.55	99.664
	This study	30I-TVG02-1	63.9358	27.849	2958	Mountain Jourdanne	30I-2-1-1OL	15	3.973	30.401	0.203	50.681	0.029	0.068	13.602		0.009	0.268	0.025	0	99.259	65.3128	0.165798	34.5214			0.388369	Plagioclase mounted in epoxy resin disks		30I-TVG02-1	51.02	0.988	19.62		0.108	5.58	11.09	3.78	0.2		0.118	0.55	99.664
	This study	30I-TVG02-1	63.9358	27.849	2958	Mountain Jourdanne	30I-2-1-2PL	17	3.822	30.322	0.151	51.101	0.02	0.051	14.023		0	0.297	0	0.003	99.79	66.8942	0.113596	32.9922			0.362392	Plagioclase mounted in epoxy resin disks		30I-TVG02-1	51.02	0.988	19.62		0.108	5.58	11.09	3.78	0.2		0.118	0.55	99.664
	This study	30I-TVG02-1	63.9358	27.849	2958	Mountain Jourdanne	30I-2-1-3PL	19	3.793	30.329	0.179	50.663	0.054	0.044	14.132		0	0.342	0.008	0.001	99.545	67.1036	0.305295	32.5911			0.356868	Plagioclase mounted in epoxy resin disks		30I-TVG02-1	51.02	0.988	19.62		0.108	5.58	11.09	3.78	0.2		0.118	0.55	99.664
	This study	30I-TVG02-1	63.9358	27.849	2958	Mountain Jourdanne	30I-2-1-4PL	21	3.22	31.343	0.132	49.467	0.019	0.038	14.93		0	0.331	0.031	0	99.511	71.85	0.108869	28.0412			0.286764	Plagioclase mounted in epoxy resin disks		30I-TVG02-1	51.02	0.988	19.62		0.108	5.58	11.09	3.78	0.2		0.118	0.55	99.664
	This study	30I-TVG02-1	63.9358	27.849	2958	Mountain Jourdanne	30I-2-1-5PL	23	3.555	30.566	0.169	49.895	0.041	0.035	14.365		0.004	0.318	0.007	0	98.955	68.9074	0.234168	30.8584			0.32905	Plagioclase mounted in epoxy resin disks		30I-TVG02-1	51.02	0.988	19.62		0.108	5.58	11.09	3.78	0.2		0.118	0.55	99.664
	This study	30I-TVG02-1	63.9358	27.849	2958	Mountain Jourdanne	30I-2-1-6PL	26	4.246	29.742	0.193	51.71	0.056	0.034	13.114		0.004	0.334	0	0	99.433	62.8544	0.319575	36.826			0.4305	Plagioclase mounted in epoxy resin disks		30I-TVG02-1	51.02	0.988	19.62		0.108	5.58	11.09	3.78	0.2		0.118	0.55	99.664
	This study	30I-TVG02-1	63.9358	27.849	2958	Mountain Jourdanne	30I-2-1-7PL	28	3.634	30.3	0.19	50.337	0.033	0.015	13.938		0.009	0.309	0.019	0	98.784	67.8141	0.191169	31.9947			0.346667	Plagioclase mounted in epoxy resin disks		30I-TVG02-1	51.02	0.988	19.62		0.108	5.58	11.09	3.78	0.2		0.118	0.55	99.664
	This study	30I-TVG02-1	63.9358	27.849	2958	Mountain Jourdanne	30I-2-1-8PL	30	3.473	30.584	0.164	49.857	0.043	0.003	14.514		0.017	0.251	0.001	0.009	98.916	69.6122	0.245556	30.1423			0.31816	Plagioclase mounted in epoxy resin disks		30I-TVG02-1	51.02	0.988	19.62		0.108	5.58	11.09	3.78	0.2		0.118	0.55	99.664
	This study	30I-TVG02-1	63.9358	27.849	2958	Mountain Jourdanne	30I-2-1-9PL	33	4.352	30.098	0.179	51.441	0.038	0.028	13.086		0.035	0.309	0	0	99.566	62.2951	0.215385	37.4895			0.442191	Plagioclase mounted in epoxy resin disks		30I-TVG02-1	51.02	0.988	19.62		0.108	5.58	11.09	3.78	0.2		0.118	0.55	99.664
	This study	30I-TVG02-1	63.9358	27.849	2958	Mountain Jourdanne	30I-2-1-10PL	35	3.673	30.747	0.177	50.363	0.027	0	14.186		0.017	0.319	0.019	0	99.528	67.9905	0.154077	31.8554			0.344262	Plagioclase mounted in epoxy resin disks		30I-TVG02-1	51.02	0.988	19.62		0.108	5.58	11.09	3.78	0.2		0.118	0.55	99.664
	This study	30I-TVG02-1	63.9358	27.849	2958	Mountain Jourdanne	30I-2-1-11PL	38	3.851	30.322	0.164	50.832	0.05	0.027	13.634		0.009	0.271	0.01	0	99.17	65.9854	0.288123	33.7265			0.375559	Plagioclase mounted in epoxy resin disks		30I-TVG02-1	51.02	0.988	19.62		0.108	5.58	11.09	3.78	0.2		0.118	0.55	99.664
	This study	30I-TVG02-1	63.9358	27.849	2958	Mountain Jourdanne	30I-2-1-12PL	40	3.718	30.979	0.172	50.428	0.033	0.044	14.078		0	0.324	0.007	0	99.783	67.5358	0.188491	32.2757			0.351153	Plagioclase mounted in epoxy resin disks		30I-TVG02-1	51.02	0.988	19.62		0.108	5.58	11.09	3.78	0.2		0.118	0.55	99.664
	This study	30I-TVG02-1	63.9358	27.849	2958	Mountain Jourdanne	30I-2-1-13PL	42	4.828	29.362	0.203	53.078	0.053	0.012	12.261		0.009	0.387	0.009	0	100.202	58.2175	0.299632	41.4828			0.523564	Plagioclase mounted in epoxy resin disks		30I-TVG02-1	51.02	0.988	19.62		0.108	5.58	11.09	3.78	0.2		0.118	0.55	99.664
	This study	30I-TVG02-1	63.9358	27.849	2958	Mountain Jourdanne	30I-2-1-14PL	44	4.032	30.262	0.179	51.392	0.03	0.041	13.428		0.03	0.339	0.014	0.013	99.76	64.6825	0.17206	35.1455			0.399243	Plagioclase mounted in epoxy resin disks		30I-TVG02-1	51.02	0.988	19.62		0.108	5.58	11.09	3.78	0.2		0.118	0.55	99.664
	This study	30I-TVG02-1	63.9358	27.849	2958	Mountain Jourdanne	30I-2-1-15PL	46	3.888	30.942	0.163	50.777	0.044	0.019	13.786		0.056	0.321	0	0	99.996	66.044	0.250976	33.705			0.374987	Plagioclase mounted in epoxy resin disks		30I-TVG02-1	51.02	0.988	19.62		0.108	5.58	11.09	3.78	0.2		0.118	0.55	99.664
	This study	30I-TVG02-1	63.9358	27.849	2958	Mountain Jourdanne	30I-2-1-16PL	48	4.15	30.199	0.199	51.1	0.031	0.048	13.526		0.043	0.348	0.009	0	99.653	64.1876	0.175157	35.6372			0.40795	Plagioclase mounted in epoxy resin disks		30I-TVG02-1	51.02	0.988	19.62		0.108	5.58	11.09	3.78	0.2		0.118	0.55	99.664
	This study	30I-TVG02-1	63.9358	27.849	2958	Mountain Jourdanne	30I-2-1-17PL	50	3.915	30.888	0.141	50.537	0.049	0.044	14.008		0	0.313	0.008	0.021	99.924	66.2292	0.275838	33.4949			0.371607	Plagioclase mounted in epoxy resin disks		30I-TVG02-1	51.02	0.988	19.62		0.108	5.58	11.09	3.78	0.2		0.118	0.55	99.664
	This study	30I-TVG02-1	63.9358	27.849	2958	Mountain Jourdanne	30I-2-1-18PL	52	4.19	30.436	0.163	51.537	0.057	0.005	13.439		0.022	0.31	0.009	0	100.168	63.7254	0.321814	35.9528			0.414549	Plagioclase mounted in epoxy resin disks		30I-TVG02-1	51.02	0.988	19.62		0.108	5.58	11.09	3.78	0.2		0.118	0.55	99.664
	This study	30I-TVG02-1	63.9358	27.849	2958	Mountain Jourdanne	30I-2-1-19PL	54	3.973	30.751	0.193	50.713	0.019	0.026	13.709		0	0.304	0.01	0	99.698	65.5274	0.108132	34.3644			0.385337	Plagioclase mounted in epoxy resin disks		30I-TVG02-1	51.02	0.988	19.62		0.108	5.58	11.09	3.78	0.2		0.118	0.55	99.664
	This study	30I-TVG02-1	63.9358	27.849	2958	Mountain Jourdanne	30I-2-1-20PL	56	3.591	31.021	0.169	50.034	0.016	0.029	14.314		0	0.31	0.004	0.001	99.489	68.7143	0.0914513	31.1943			0.333567	Plagioclase mounted in epoxy resin disks		30I-TVG02-1	51.02	0.988	19.62		0.108	5.58	11.09	3.78	0.2		0.118	0.55	99.664
	This study	30I-TVG02-1	63.9358	27.849	2958	Mountain Jourdanne	30I-2-1-21PL	58	4.139	30.302	0.163	51.365	0.06	0.035	13.356		0.069	0.323	0.003	0.039	99.854	63.8517	0.341532	35.8068			0.412048	Plagioclase mounted in epoxy resin disks		30I-TVG02-1	51.02	0.988	19.62		0.108	5.58	11.09	3.78	0.2		0.118	0.55	99.664
	(a)	30I-SWIR-S004TVG02	63.936	27.849	2958	Mountain Jourdanne	PUB-1-MI1		3.56	30.17	0.14	52.01	0.04	0.04	13.52	0.01	0.02	0.32		0	99.93	67.6	0.2	32.2			0.350045			30I-SWIR-S004TVG02	51.02	0.988	19.62	5.94776	0.108	5.58	11.09	3.78	0.2		0.118	0.55	99.664	1281.27
	(a)	30I-SWIR-S004TVG02	63.936	27.849	2958	Mountain Jourdanne	PUB-1-MI2		3.63	29.98	0.16	52.49	0.07	0.04	13.35	0.04	0.03	0.29		0.09	100.38	66.8	0.4	32.8			0.360837			30I-SWIR-S004TVG02	51.02	0.988	19.62	5.94776	0.108	5.58	11.09	3.78	0.2		0.118	0.55	99.664	1280.65
	(a)	30I-SWIR-S004TVG02	63.936	27.849	2958	Mountain Jourdanne	PUB-1-MI3		3.63	29.98	0.16	52.49	0.07	0.04	13.35	0.04	0.03	0.29		0.09	100.38	66.8	0.4	32.8			0.360837			30I-SWIR-S004TVG02	51.02	0.988	19.62	5.94776	0.108	5.58	11.09	3.78	0.2		0.118	0.55	99.664	1280.65
	(a)	30I-SWIR-S004TVG02	63.936	27.849	2958	Mountain Jourdanne	PUB-1-MI4		3.63	29.98	0.16	52.49	0.07	0.04	13.35	0.04	0.03	0.29		0.09	100.38	66.8	0.4	32.8			0.360837			30I-SWIR-S004TVG02	51.02	0.988	19.62	5.94776	0.108	5.58	11.09	3.78	0.2		0.118	0.55	99.664	1280.65
	(a)	30I-SWIR-S004TVG02	63.936	27.849	2958	Mountain Jourdanne	PUB-2-MI1		3.32	29.63	0.21	51.46	0.05	0.06	13.48			0.31	0.01	0.05	98.59	69	0.3	30.7			0.326967			30I-SWIR-S004TVG02	51.02	0.988	19.62	5.94776	0.108	5.58	11.09	3.78	0.2		0.118	0.55	99.664	1283.14
	(a)	30I-SWIR-S004TVG02	63.936	27.849	2958	Mountain Jourdanne	PUB-2-MI2		3.43	29.8	0.19	51.57	0.05	0.04	13.3			0.35	0.06	0.02	98.94	68	0.3	31.7			0.342582			30I-SWIR-S004TVG02	51.02	0.988	19.62	5.94776	0.108	5.58	11.09	3.78	0.2		0.118	0.55	99.664	1281.94
	(b)	30I-TVG2-1	63.936	27.849		Mountain Jourdanne	C1-1		3.789	30.128	0.205	51.986	0.041	0.136	13.385		0.025	0.277		0.037	100.009	65.9677	0.240592	33.7918			0.397877			30I-TVG2-1	51.16	0.87	20.81	5.22791	0.12	5.09	11.58	3.95	0.18		0.11	-0.04	99.64	1297.18
	(b)	30I-TVG2-1	63.936	27.849		Mountain Jourdanne	C1-2		3.789	30.128	0.205	51.986	0.041	0.136	13.385		0.025	0.277		0.037	100.009	65.9677	0.240592	33.7918			0.397877			30I-TVG2-1	51.16	0.87	20.81	5.22791	0.12	5.09	11.58	3.95	0.18		0.11	-0.04	99.64	1297.18
	(b)	30I-TVG2-1	63.936	27.849		Mountain Jourdanne	C1-2		3.789	30.128	0.205	51.986	0.041	0.136	13.385		0.025	0.277		0.037	100.009	65.9677	0.240592	33.7918			0.397877			30I-TVG2-1	51.16	0.87	20.81	5.22791	0.12	5.09	11.58	3.95	0.18		0.11	-0.04	99.64	1297.18
	(b)	30I-TVG2-1	63.936	27.849		Mountain Jourdanne	C1-3		3.717	30.212	0.193	52.482	0.035	0.097	13.519		0.009	0.255			100.519	66.6393	0.205418	33.1552			0.386447			30I-TVG2-1	51.16	0.87	20.81	5.22791	0.12	5.09	11.58	3.95	0.18		0.11	-0.04	99.64	1298.01
	(b)	30I-TVG2-1	63.936	27.849		Mountain Jourdanne	C1-3		3.717	30.212	0.193	52.482	0.035	0.097	13.519		0.009	0.255			100.519	66.6393	0.205418	33.1552			0.386447			30I-TVG2-1	51.16	0.87	20.81	5.22791	0.12	5.09	11.58	3.95	0.18		0.11	-0.04	99.64	1298.01
	(b)	30I-TVG2-1	63.936	27.849		Mountain Jourdanne	C1-3		3.717	30.212	0.193	52.482	0.035	0.097	13.519		0.009	0.255			100.519	66.6393	0.205418	33.1552			0.386447			30I-TVG2-1	51.16	0.87	20.81	5.22791	0.12	5.09	11.58	3.95	0.18		0.11	-0.04	99.64	1298.01
	(b)	30I-TVG2-1	63.936	27.849		Mountain Jourdanne	C1-4		3.91	29.747	0.155	52.736	0.048	0.165	13.009			0.273		0.037	100.08	64.5879	0.283748	35.1283			0.42245			30I-TVG2-1	51.16	0.87	20.81	5.22791	0.12	5.09	11.58	3.95	0.18		0.11	-0.04	99.64	1295.32
	(b)	30I-TVG2-1	63.936	27.849		Mountain Jourdanne	C1-4		3.91	29.747	0.155	52.736	0.048	0.165	13.009			0.273		0.037	100.08	64.5879	0.283748	35.1283			0.42245			30I-TVG2-1	51.16	0.87	20.81	5.22791	0.12	5.09	11.58	3.95	0.18		0.11	-0.04	99.64	1295.32
	(b)	30I-TVG2-1	63.936	27.849		Mountain Jourdanne	C1-6		3.489	30.413	0.151	51.6	0.052	0.058	13.703		0.006	0.205			99.677	68.2472	0.308359	31.4444			0.357872			30I-TVG2-1	51.16	0.87	20.81	5.22791	0.12	5.09	11.58	3.95	0.18		0.11	-0.04	99.64	1300.36
	(b)	30I-TVG2-1	63.936	27.849		Mountain Jourdanne	C1-7		3.523	30.075	0.175	51.897	0.039	0.068	13.633		0.04	0.283	0.035		99.768	67.9797	0.231546	31.7888			0.363215			30I-TVG2-1	51.16	0.87	20.81	5.22791	0.12	5.09	11.58	3.95	0.18		0.11	-0.04	99.64	1299.83
	(b)	30I-TVG2-1	63.936	27.849		Mountain Jourdanne	C1-7		3.523	30.075	0.175	51.897	0.039	0.068	13.633		0.04	0.283	0.035		99.768	67.9797	0.231546	31.7888			0.363215			30I-TVG2-1	51.16	0.87	20.81	5.22791	0.12	5.09	11.58	3.95	0.18		0.11	-0.04	99.64	1299.83
	(b)	30I-TVG2-1	63.936	27.849		Mountain Jourdanne	C1-7		3.523	30.075	0.175	51.897	0.039	0.068	13.633		0.04	0.283	0.035		99.768	67.9797	0.231546	31.7888			0.363215			30I-TVG2-1	51.16	0.87	20.81	5.22791	0.12	5.09	11.58	3.95	0.18		0.11	-0.04	99.64	1299.83
	(b)	30I-TVG2-1	63.936	27.849		Mountain Jourdanne	C1-7		3.523	30.075	0.175	51.897	0.039	0.068	13.633		0.04	0.283	0.035		99.768	67.9797	0.231546	31.7888			0.363215			30I-TVG2-1	51.16	0.87	20.81	5.22791	0.12	5.09	11.58	3.95	0.18		0.11	-0.04	99.64	1299.83
	(b)	30I-TVG2-1	63.936	27.849		Mountain Jourdanne	C1-7		3.523	30.075	0.175	51.897	0.039	0.068	13.633		0.04	0.283	0.035		99.768	67.9797	0.231546	31.7888			0.363215			30I-TVG2-1	51.16	0.87	20.81	5.22791	0.12	5.09	11.58	3.95	0.18		0.11	-0.04	99.64	1299.83
	(b)	30I-TVG2-1	63.936	27.849		Mountain Jourdanne	C1-8		3.95	29.743	0.183	53.035	0.05	0.058	12.933		0.015	0.313			100.28	64.2145	0.295589	35.4899			0.42928			30I-TVG2-1	51.16	0.87	20.81	5.22791	0.12	5.09	11.58	3.95	0.18		0.11	-0.04	99.64	1294.8
	(b)	30I-TVG2-2	63.936	27.849		Mountain Jourdanne	C2-1		3.962	29.643	0.163	52.863	0.056		12.788			0.336	0.001		99.812	63.8629	0.33298	35.8042			0.475837			30I-TVG2-2	51.48	0.79	21.89	4.69702	0.09	4.54	11.89	3.88	0.17		0.1	-0.1	99.94	1311.55
	(b)	30I-TVG2-2	63.936	27.849		Mountain Jourdanne	C2-2		3.962	29.643	0.163	52.863	0.056		12.788			0.336	0.001		99.812	63.8629	0.33298	35.8042			0.475837			30I-TVG2-2	51.48	0.79	21.89	4.69702	0.09	4.54	11.89	3.88	0.17		0.1	-0.1	99.94	1311.55
	(b)	30I-TVG2-2	63.936	27.849		Mountain Jourdanne	C2-2		3.962	29.643	0.163	52.863	0.056		12.788			0.336	0.001		99.812	63.8629	0.33298	35.8042			0.475837			30I-TVG2-2	51.48	0.79	21.89	4.69702	0.09	4.54	11.89	3.88	0.17		0.1	-0.1	99.94	1311.55
	(b)	30I-TVG2-2	63.936	27.849		Mountain Jourdanne	C2-4		3.861	29.991	0.204	52.202	0.043		13.156		0.005	0.316	0.024		99.802	65.1483	0.253532	34.5981			0.450736			30I-TVG2-2	51.48	0.79	21.89	4.69702	0.09	4.54	11.89	3.88	0.17		0.1	-0.1	99.94	1313.25
	(b)	30I-TVG2-2	63.936	27.849		Mountain Jourdanne	C2-6		3.861	29.991	0.204	52.202	0.043		13.156		0.005	0.316	0.024		99.802	65.1483	0.253532	34.5981			0.450736			30I-TVG2-2	51.48	0.79	21.89	4.69702	0.09	4.54	11.89	3.88	0.17		0.1	-0.1	99.94	1313.25
	(b)	30I-TVG2-2	63.936	27.849		Mountain Jourdanne	C2-6		3.861	29.991	0.204	52.202	0.043		13.156		0.005	0.316	0.024		99.802	65.1483	0.253532	34.5981			0.450736			30I-TVG2-2	51.48	0.79	21.89	4.69702	0.09	4.54	11.89	3.88	0.17		0.1	-0.1	99.94	1313.25
	(b)	30I-TVG2-2	63.936	27.849		Mountain Jourdanne	C2-7		3.78	30.022	0.201	52.305	0.036	0.078	13.29		0.02	0.248			99.98	65.8801	0.212479	33.9074			0.436831			30I-TVG2-2	51.48	0.79	21.89	4.69702	0.09	4.54	11.89	3.88	0.17		0.1	-0.1	99.94	1314.2
	(b)	30I-TVG2-2	63.936	27.849		Mountain Jourdanne	C2-7		3.78	30.022	0.201	52.305	0.036	0.078	13.29		0.02	0.248			99.98	65.8801	0.212479	33.9074			0.436831			30I-TVG2-2	51.48	0.79	21.89	4.69702	0.09	4.54	11.89	3.88	0.17		0.1	-0.1	99.94	1314.2
	(b)	30I-TVG2-2	63.936	27.849		Mountain Jourdanne	C2-8		3.318	30.689	0.178	51.463	0.032	0.029	13.773		0.007	0.326			99.815	69.5072	0.19228	30.3006			0.369994			30I-TVG2-2	51.48	0.79	21.89	4.69702	0.09	4.54	11.89	3.88	0.17		0.1	-0.1	99.94	1318.95
	(b)	30I-TVG2-2	63.936	27.849		Mountain Jourdanne	C2-8		3.318	30.689	0.178	51.463	0.032	0.029	13.773		0.007	0.326			99.815	69.5072	0.19228	30.3006			0.369994			30I-TVG2-2	51.48	0.79	21.89	4.69702	0.09	4.54	11.89	3.88	0.17		0.1	-0.1	99.94	1318.95
	(b)	30I-TVG2-2	63.936	27.849		Mountain Jourdanne	C2-8		3.318	30.689	0.178	51.463	0.032	0.029	13.773		0.007	0.326			99.815	69.5072	0.19228	30.3006			0.369994			30I-TVG2-2	51.48	0.79	21.89	4.69702	0.09	4.54	11.89	3.88	0.17		0.1	-0.1	99.94	1318.95
	(b)	30I-TVG2-2	63.936	27.849		Mountain Jourdanne	C2-8		3.318	30.689	0.178	51.463	0.032	0.029	13.773		0.007	0.326			99.815	69.5072	0.19228	30.3006			0.369994			30I-TVG2-2	51.48	0.79	21.89	4.69702	0.09	4.54	11.89	3.88	0.17		0.1	-0.1	99.94	1318.95
	(a) Li W (2017) Petrogeochemical characteristics of basalts from Southwest Indian Ridge: Implications for magmatic processes at ultra-slow spreading ridge. Institute of Geophysics & Geomatics, Doctor thesis.
	(b) Li W, Tao C, Zhang W, Liu J, Liang J, Liao S, Yang W (2019) Melt Inclusions in Plagioclase Macrocrysts at Mountain Jourdanne, Southwest Indian Ridge (~64° E): Implications for an Enriched Mantle Source and Shallow Magmatic Processes. Minerals 9: 493
