# Supplementary material for: Magmatic processes within the plumbing system of the ultraslow-spreading southwest Indian ridge: constraints from olivine, plagioclase and melt inclusions
Source: Springer Nature journal article supplement (doi:10.1007/s00410-024-02098-0), 2024-02-22
Supplement: MOESM5 [file 410_2024_2098_MOESM5_ESM.xls]

## Sheet: Table S4
	Supplemental Table S4. Major element and Pb isotope compositions (in wt%) of olivine melt inclusions of MORBs from SWIR
					Measured data																					Corrected data
	Sample	Spot	Zone	No.	Na2O	Al2O3	MgO	SiO2	K2O	TiO2	CaO	P2O5	FeOt	MnO	Cr2O3	Total	Fo_h	208Pb/206Pb	SE	207Pb/206Pb	SE	Note			KD	SiO2	TiO2	Al2O3	Fe2O3	FeO	MnO	MgO	CaO	Na2O	K2O	P2O5	Cr2O3	x (ratio of Ol addition)	CORR_COEF	CaO/Al2O3	CaO-Ol(%)	MgO-Ol(%)	DCaO(Ol/L dry)	DCaO(Ol/L meas)	ΔD	H2O Inferred-Gavrilenko et al. (2016 JP)	H2O8.0	Mg#-Ol-MI	K/Ti=K2O/TiO2*100
	Olivines in the thin section of MORBs
	30I-TVG02-1	30I-2-1-25MI	Mountain Jourdanne	259	4.13	16.711	5.058	51.848	0.199	1.341	12.025		8.007	0.108	0.01	99.437	85.9585					Unhomogenized MI			0.299079	51.556	1.281	15.958	0.934	7.174	0.103	7.369	11.483	3.944	0.19	0	0.01	-0.053	0.95	0.719576	0.276311	46.2797	0.0403133	0.0240627	0.0162506	3.05512	2.65662	62.1053	14.8322
	Olivines mounted in epoxy resin disks
	30IV-TVG04	DY30IV-1	Segment 28	65	2.536	17.499	4.583	50.217	0.042	0.734	14.926	0.191	7.737	0.145	0.039	98.649	87.4483					re-homogenized MI			0.306021	50.105	0.684	16.296	0.759	7.061	0.135	8.446	13.9	2.362	0.039	0.178	0.036	-0.101	0.919	0.85297	0.332468	47.2276	0.0356822	0.0239185	0.0117637	2.21157	2.42501	66.0329	5.70175
	30I-TVG02-1	30I-2-1-3MI	Mountain Jourdanne	69	4.193	16.872	4.429	51.183	0.204	1.172	12.283	0.175	7.521	0.175	0.021	98.228	86.2985					re-homogenized MI			0.298692	51.317	1.114	16.038	0.908	7.013	0.166	7.402	11.676	3.986	0.194	0.166	0.02	-0.0778	0.935	0.728021	0.31257	46.2695	0.0401714	0.0267703	0.0134011	2.51941	2.20748	62.756	17.4147
	30I-TVG02-1	30I-2-1-6MI	Mountain Jourdanne	71	4.16	16.639	6.245	50.744	0.215	1.186	11.381	0.171	7.758	0.158	0.035	98.692	85.8338	2.11498	0.00464745	0.869671	0.00214498	re-homogenized MI			0.297551	51.228	1.182	16.588	0.901	6.975	0.158	7.055	11.346	4.147	0.214	0.17	0.035	-0.0258	0.985	0.683988	0.285304	46.0867	0.0416635	0.0251458	0.0165177	3.10533	2.50761	61.7612	18.1049
	30I-TVG02-1	30I-2-1-8MI	Mountain Jourdanne	73	4.065	16.57	4.876	51.117	0.183	1.234	12.137	0.175	7.552	0.134	0.033	98.076	86.3656					re-homogenized MI			0.299546	51.577	1.197	16.077	0.873	6.804	0.13	7.243	11.776	3.944	0.178	0.17	0.032	-0.0679	0.952	0.732475	0.302185	46.4385	0.0408551	0.0256611	0.015194	2.85647	2.41211	62.9774	14.8705
	30I-TVG02-1	30I-2-1-9MI	Mountain Jourdanne	75	4.044	16.436	6.072	50.714	0.254	1.074	11.474	0.252	7.818	0.119	0.026	98.283	86.2384					re-homogenized MI			0.298981	51.304	1.064	16.278	0.903	7.039	0.118	7.399	11.364	4.005	0.252	0.25	0.026	-0.033	0.974	0.69812	0.308633	46.2421	0.0401843	0.0271588	0.0130255	2.44879	2.14414	62.6824	23.6842
	30I-TVG02-1	30I-2-1-10MI	Mountain Jourdanne	77	4.11	16.354	6.323	50.579	0.304	1.005	10.74	0.252	8.111	0.124	0.027	97.929	85.079	2.11703	0.00360877	0.869206	0.00200619	re-homogenized MI			0.300688	51.532	1.016	16.528	0.941	7.269	0.125	6.992	10.854	4.154	0.307	0.255	0.027	-0.008	0.991	0.656704	0.3123	45.5188	0.0419344	0.0287728	0.0131616	2.47437	1.96786	60.5622	30.2165
	30I-TVG02-1	30I-2-1-11-2MI	Mountain Jourdanne	80	4.157	16.299	6.239	50.681	0.204	1.046	11.326	0.316	7.856	0.185	0.027	98.336	85.7929	2.11651	0.00402545	0.872331	0.00182938	re-homogenized MI			0.299486	51.35	1.046	16.297	0.913	7.039	0.185	7.142	11.324	4.156	0.204	0.316	0.027	-0.0239	0.984	0.694852	0.337354	46.0681	0.0412894	0.029791	0.0114984	2.16169	1.78235	61.8248	19.5029
	30I-TVG02-1	30I-2-1-12MI	Mountain Jourdanne	83	3.913	16.419	5.361	50.203	0.196	0.98	12.25	0.217	7.993	0.157	0.05	97.739	86.0602					re-homogenized MI			0.299712	50.926	0.96	16.091	0.916	7.193	0.154	7.467	12.005	3.835	0.192	0.213	0.049	-0.0448	0.959	0.746069	0.320182	46.1639	0.0398919	0.0266707	0.0132212	2.48559	2.21046	62.4075	20
	30I-TVG02-1	30I-2-1-13MI	Mountain Jourdanne	85	4.109	16.391	6.674	50.587	0.218	1.163	11.085	0.235	7.539	0.112	0.046	98.159	86.1091					re-homogenized MI			0.297904	51.468	1.179	16.618	0.872	6.797	0.114	7.042	11.239	4.166	0.221	0.238	0.047	-0.0202	0.996	0.676315	0.308458	46.2383	0.0417194	0.0274453	0.0142741	2.68353	2.16021	62.3433	18.7447
	30I-TVG02-1	30I-2-1-14-1MI	Mountain Jourdanne	87	4.18	16.614	6.721	50.572	0.262	1	11.038	0.158	7.525	0.19	0.023	98.283	86.3156	2.11151	0.00469362	0.863122	0.00244141	re-homogenized MI			0.296637	51.395	1.013	16.826	0.862	6.757	0.192	7.093	11.179	4.233	0.265	0.16	0.023	-0.023	0.996	0.664388	0.294982	46.4343	0.0415001	0.0263872	0.0151129	2.84123	2.31538	62.6644	26.1599
	30I-TVG02-1	30I-2-1-14-2MI	Mountain Jourdanne	88	4.197	16.557	6.528	50.689	0.215	1.082	11.015	0.248	7.499	0.155	0.015	98.2	86.3156					re-homogenized MI			0.297518	51.487	1.09	16.682	0.867	6.775	0.156	7.133	11.098	4.229	0.217	0.25	0.015	-0.0271	0.99	0.665268	0.294982	46.4343	0.0413281	0.0265798	0.0147483	2.77269	2.28123	62.7261	19.9083
	30I-TVG02-1	30I-2-1-14-3MI	Mountain Jourdanne	89	4.074	16.073	6.372	50.399	0.241	1.115	11.224	0.162	8.153	0.185	0.008	98.006	86.3156	2.11058	0.00521465	0.866956	0.00244436	re-homogenized MI			0.297965	51.142	1.108	15.972	0.959	7.313	0.184	7.711	11.154	4.048	0.239	0.161	0.008	-0.0207	0.975	0.698347	0.294982	46.4343	0.0388427	0.0264463	0.0123964	2.33052	2.18901	62.7016	21.5704
	30I-TVG02-1	30I-2-1-15MI	Mountain Jourdanne	91	4.007	16.374	6.275	50.548	0.21	0.99	11.429	0.145	7.618	0.132	0.009	97.737	86.0766					re-homogenized MI			0.299288	51.545	0.998	16.498	0.871	6.887	0.133	7.149	11.516	4.037	0.212	0.146	0.009	-0.0279	0.986	0.698024	0.293932	46.1707	0.0412593	0.0255238	0.0157355	2.95827	2.44321	62.423	21.2425
	30I-TVG02-1	30I-2-1-18MI	Mountain Jourdanne	97	4.006	16.401	6.367	50.527	0.219	1.059	11.193	0.248	7.873	0.129	0.034	98.056	85.9471	2.12242	0.00416679	0.874655	0.00194989	re-homogenized MI			0.29993	51.352	1.063	16.457	0.899	7.071	0.129	7.277	11.231	4.02	0.22	0.249	0.034	-0.0213	0.985	0.682445	0.330268	46.1601	0.0407089	0.0294069	0.011302	2.12478	1.80859	62.2079	20.6961
	30I-TVG02-1	30I-2-1-19MI	Mountain Jourdanne	100	4.143	16.477	6.558	51.071	0.209	1.106	11.004	0.154	7.435	0.146	0.047	98.35	86.1678	2.11332	0.0043605	0.863024	0.00215838	re-homogenized MI			0.298725	51.852	1.118	16.657	0.849	6.678	0.148	6.972	11.124	4.188	0.211	0.156	0.048	-0.0266	0.995	0.667827	0.285781	46.3459	0.0420204	0.0256905	0.0163299	3.07003	2.42972	62.5451	18.873
	30I-TVG02-1	30I-2-1-20MI	Mountain Jourdanne	102	4.185	16.63	6.565	50.872	0.233	1	10.744	0.176	7.383	0.092	0.044	97.924	86.2266	2.11357	0.00469422	0.867757	0.00251428	re-homogenized MI			0.298062	51.903	1.017	16.919	0.836	6.636	0.094	6.947	10.931	4.258	0.237	0.179	0.045	-0.0266	0.997	0.646078	0.249234	46.3068	0.0421279	0.0228007	0.0193272	3.63351	2.85817	62.6306	23.3038
	30I-TVG02-1	30I-2-1-22MI	Mountain Jourdanne	106	4.146	16.612	5.871	50.661	0.244	0.968	11.539	0.175	7.904	0.128	0.01	98.258	85.9913	2.10133	0.00612759	0.859624	0.00279166	re-homogenized MI			0.298039	51.262	0.958	16.442	0.909	7.083	0.127	7.27	11.421	4.104	0.242	0.173	0.01	-0.0325	0.973	0.694624	0.342156	46.4307	0.040739	0.0299585	0.0107805	2.02673	1.72231	62.1226	25.261
	30I-TVG02-1	30I-2-1-23MI	Mountain Jourdanne	108	4.186	16.281	6.493	50.882	0.204	1.022	10.949	0.261	7.583	0.136	0.054	98.051	85.9823	2.12686	0.00486982	0.865682	0.00233918	re-homogenized MI			0.299347	51.807	1.035	16.485	0.874	6.803	0.138	7.008	11.086	4.239	0.207	0.264	0.055	-0.0225	0.994	0.67249	0.299919	46.1265	0.0418656	0.0270538	0.0148118	2.78461	2.22321	62.2054	20
	30I-TVG02-1	30I-2-1-24MI	Mountain Jourdanne	110	4.027	16.449	6.55	50.753	0.245	1.242	11.113	0.128	7.495	0.131	0.067	98.2	86.0091	2.11921	0.00419183	0.869551	0.00230351	re-homogenized MI			0.29855	51.618	1.259	16.668	0.86	6.738	0.133	6.938	11.261	4.081	0.248	0.13	0.068	-0.0228	0.996	0.675606	0.302375	46.0727	0.0421666	0.0268516	0.015315	2.87923	2.25985	62.211	19.6982
		Fo_h	Forsterite content of the hosting olivine
		KD	KD = (XFeO/XMgO)olivine/(XFeO/XMgO)melt, where X are mole fractions.
		CORR_COEF:	Correction coefficient
			****************** New calculation ********************
			Correcting MI in olivine for post-entrapment re-equilibration
			The model used for Olv is: Ford et al. (1983)
			Fe2O3 in the melt is calculated using QFM buffer of oxygen fugacity
			f(O2) is calculated following the model of Borisov and Shapkin (1990)
			Calculation Pressure = 1 atm
			Choice for minor elements in olivine (Ca Mn Cr) is: all set to 0
[truncated: 9 more columns]
