# Supplementary material for: Magmatic processes within the plumbing system of the ultraslow-spreading southwest Indian ridge: constraints from olivine, plagioclase and melt inclusions
Source: Springer Nature journal article supplement (doi:10.1007/s00410-024-02098-0), 2024-02-22
Supplement: MOESM6 [file 410_2024_2098_MOESM6_ESM.xls]

## Sheet: Table S5
		Supplemental Table S5. Major-trace element and Pb-Sr isotope compositions (in wt%) of plagioclase melt inclusions of MORBs from SWIR
										Measured data of MI major element concentrations																				Corrected data of MI major element concentrations																Data of host Pl major concentrations
		Data source	longitude（°E）	latitude（°S）	Deepth (m)	Sample	MI Spot	Zone	No.	Na2O	Al2O3	MgO	SiO2	K2O	TiO2	CaO	NiO	P2O5	FeO	MnO	Cr2O3	Total	208Pb/206Pb	SE	207Pb/206Pb	SE	87Sr/86Sr	SE	Note-1	CaO/Al2O3	x (ratio of Pl addition)	KD (An-Ab)Pl-melt	Na2O	Al2O3	MgO	SiO2	K2O	TiO2	CaO	NiO	P2O5	FeO	MnO	Cr2O3		No.	Na2O	Al2O3	MgO
		This study	50.4853	37.697	1549	DY34-IV	34TVG-6MI	Segment 27	277	2.451	14.795	8.824	49.62	0.039	1.072	13.216	0		9.025	0.223	0.046	99.311					0.704026	0.000398121	Unhomogenized MI	0.893275	0.054	0.220223	2.4166	15.7703	8.35782	49.4772	0.039216	1.01541	13.4309	0.000594		8.55839	0.212038	0.044866		276	1.814	32.856	0.191
		This study	49.6647	37.8112	2398	30IV-TVG04	30TVG-4-2MI	Segment 28	282	2.067	10.968	12.428	49.8	0.024	1.187	13.237	0.024		9.957	0.29	0.072	100.054							Unhomogenized MI	1.20687	0.245	0.313176	2.04789	16.3161	9.44243	49.1515	0.0191	0.89986	14.2209	0.01812		7.605	0.21895	0.068815		281	1.989	32.797	0.242
		This study	63.9358	27.849	2958	30I-TVG02-1	30I-2-1-1MI	Mountain Jourdanne	192	3.37	15.536	7.213	51.77	0.257	1.461	10.504	0		8.192	0.117	0.032	98.452							Unhomogenized MI	0.676107	0.085	0.324533	3.40298	16.7895	6.61494	51.6978	0.23864	1.33682	10.8075	0.004845		7.5205	0.10901	0.030385		191	3.758	30.283	0.177
		This study	63.9358	27.849	2958	30I-TVG02-1	30I-2-1-2MI	Mountain Jourdanne	194	4.107	15.442	7.167	51.078	0.268	1.49	10.229	0.035		8.195	0.179	0.056	98.246	2.1059	0.00438659	0.871815	0.00201876			Unhomogenized MI	0.662414	0.087	0.239526	4.04288	16.7362	6.55861	51.0463	0.249208	1.36411	10.5763	0.031955		7.5084	0.163427	0.053738		193	3.37	30.318	0.174
		This study	63.9358	27.849	2958	30I-TVG02-1	30I-2-1-2MI-2	Mountain Jourdanne	195	4.054	15.351	7.145	51.48	0.257	1.309	10.507	0		8.169	0.15	0.07	98.492							Unhomogenized MI	0.684451	0.088	0.2456	3.99381	16.6681	6.53155	51.4126	0.23896	1.19759	10.8338	0		7.47679	0.1368	0.06648		193	3.37	30.318	0.174
		This study	63.9358	27.849	2958	30I-TVG02-1	30I-2-1-3 mi-1	Mountain Jourdanne	213	4.379	15.736	6.557	51.189	0.288	1.47	10.714	0		8.184	0.174	0.059	98.75	2.11693	0.00397309	0.868023	0.00185567			Unhomogenized MI	0.680859	0.047	0.250139	4.35009	16.4191	6.25738	51.1618	0.275686	1.40091	10.8794	0.000376		7.8181	0.166104	0.056791		203	3.764	30.271	0.182
		This study	63.9358	27.849	2958	30I-TVG02-1	30I-2-1-3 mi-2	Mountain Jourdanne	214	4.265	15.691	7.085	51.271	0.278	1.404	10.452	0.003		8.401	0.156	0.036	99.042							Unhomogenized MI	0.666114	0.074	0.258993	4.22793	16.7699	6.57418	51.2222	0.259352	1.3001	10.7318	0.00337		7.80885	0.1449	0.034224		203	3.764	30.271	0.182
		This study	63.9358	27.849	2958	30I-TVG02-1	30I-2-1-11mi	Mountain Jourdanne	224	4.245	15.998	7.743	50.611	0.215	1.269	10.599	0		8.04	0.151	0.059	98.93							Unhomogenized MI	0.66252	0.094	0.312452	4.22874	17.3015	7.03142	50.7194	0.19761	1.15883	10.8684	0.001786		7.31385	0.13737	0.053454		223	4.072	29.865	0.173
		This study	63.9358	27.849	2958	30I-TVG02-1	30I-2-1-12MI	Mountain Jourdanne	226	4.221	15.249	7.166	51.412	0.239	1.402	10.63	0.007		8.096	0.151	0.032	98.605							Unhomogenized MI	0.697095	0.094	0.273742	4.18866	16.6578	6.51148	51.3781	0.219918	1.2751	10.962	0.006342		7.36553	0.136806	0.032		225	3.877	30.236	0.203
		This study	63.9358	27.849	2958	30I-TVG02-1	30I-2-1-13MI-1	Mountain Jourdanne	228	4.244	15.819	7.242	51.347	0.23	1.352	10.608	0		8.011	0.154	0.077	99.084							Unhomogenized MI	0.670586	0.074	0.27142	4.21514	16.8873	6.72008	51.3236	0.215348	1.25573	10.8741	0		7.44416	0.143122	0.071302		227	3.854	30.255	0.189
		This study	63.9358	27.849	2958	30I-TVG02-1	30I-2-1-13MI-2	Mountain Jourdanne	229	4.133	15.582	7.259	51.096	0.276	1.339	10.802	0.005		8.039	0.119	0.016	98.666	2.14192	0.00460456	0.864416	0.00189489	0.703067	0.000153639	Unhomogenized MI	0.693236	0.086	0.284639	4.10901	16.8439	6.65098	51.0904	0.255016	1.22823	11.0946	0.00457		7.37783	0.109368	0.014624		227	3.854	30.255	0.189
		This study	63.9358	27.849	2958	30I-TVG02-1	30I-2-1-13MI-3	Mountain Jourdanne	230	4.368	15.815	7.148	51.082	0.239	1.292	10.695	0		7.892	0.186	0.096	98.813					0.703313	0.00012063	Unhomogenized MI	0.676257	0.072	0.266708	4.33099	16.8547	6.64695	51.0783	0.224096	1.20265	10.9476	0		7.34905	0.173112	0.089088		227	3.854	30.255	0.189
		This study	63.9358	27.849	2958	30I-TVG02-1	30I-2-1-13MI-4	Mountain Jourdanne	231	4.208	15.827	7.267	50.894	0.248	1.381	10.672	0.02		8.02	0.145	0.055	98.737	2.11746	0.00438781	0.867749	0.0021212	0.703517	0.00011397	Unhomogenized MI	0.674291	0.075	0.277812	4.18145	16.9091	6.73615	50.9043	0.2318	1.28125	10.9369	0.0185		7.44482	0.13465	0.050875		227	3.854	30.255	0.189
		This study	63.9358	27.849	2958	30I-TVG02-1	30I-2-1-16mi-1	Mountain Jourdanne	235	4.171	15.757	7.231	51.872	0.244	1.22	10.563	0		7.724	0.131	0.046	98.959							Unhomogenized MI	0.670369	0.078	0.294909	4.16616	16.877	6.68414	51.8564	0.227074	1.1278	10.8218	0.004368		7.14586	0.120782	0.04366		234	4.109	30.116	0.22
		This study	63.9358	27.849	2958	30I-TVG02-1	30I-2-1-16mi-2	Mountain Jourdanne	236	4.208	15.914	7.502	51.303	0.27	1.269	10.985	0		7.912	0.19	0.058	99.611	2.12158	0.0040636	0.86155	0.0020305			Unhomogenized MI	0.690273	0.084	0.310811	4.19968	17.107	6.89031	51.334	0.249588	1.1656	11.2283	0.004704		7.2736	0.17404	0.054472		234	4.109	30.116	0.22
		This study	63.9358	27.849	2958	30I-TVG02-1	30I-2-1-16mi-3	Mountain Jourdanne	237	4.27	15.917	7.431	51.399	0.237	1.272	10.516	0.017		7.969	0.182	0.033	99.243	2.10193	0.00440849	0.84	0.00206081			Unhomogenized MI	0.660677	0.08	0.293092	4.25712	17.0529	6.85412	51.4208	0.2202	1.17328	10.7852	0.02012		7.35644	0.16744	0.03164		234	4.109	30.116	0.22
		This study	63.9358	27.849	2958	30I-TVG02-1	30I-2-1-16mi-4	Mountain Jourdanne	238	4.483	15.726	7.286	51.681	0.282	1.292	9.72	0.021		7.737	0.128	0.054	98.41	2.11761	0.00401654	0.868656	0.00206782			Unhomogenized MI	0.618085	0.081	0.257528	4.45271	16.8916	6.71365	51.6803	0.261345	1.19043	10.057	0.023835		7.13558	0.117632	0.050922		234	4.109	30.116	0.22
		This study	63.9358	27.849	2958	30I-TVG02-1	30I-2-1-17MI	Mountain Jourdanne	249	4.27	15.698	7.449	51.444	0.247	1.573	10.809	0.006		8.018	0.184	0.03	99.728							Unhomogenized MI	0.688559	0.088	0.278622	4.23066	16.9943	6.81241	51.4383	0.229928	1.43669	11.0902	0.008728		7.33512	0.169392	0.02736		248	3.823	30.429	0.215
		This study	63.9358	27.849	2958	30I-TVG02-1	30I-2-1-22MI	Mountain Jourdanne	255	4.392	15.948	6.877	51.031	0.221	1.28	11.014	0		8.406	0.178	0.061	99.408							Unhomogenized MI	0.69062	0.05	0.279818	4.37255	16.6829	6.54235	51.0606	0.2129	1.2166	11.1666	0		7.9988	0.1691	0.05885		254	4.003	30.647	0.184
		(a)	51.56	37.43	1900-2700	20VII-L12	1-A-MI1	segment 27	645	1.77	9.92	12.15	50.57	0.16	1.05	10.36	0.03	0.04	12.62	0.23	0.03	98.91								1.04435	0.3	0.361019	1.938	16.253	8.565	49.835	0.121	0.735	11.905	0.036	0.028	8.933	0.161	0.021		1-A-MI1-plg	2.33	31.03	0.2
		(a)	51.56	37.43	1900-2700	20VII-L12	1-B-2-MI1	segment 27	486	1.5	8.81	12.47	49.38	0.07	0.72	11.33	0.08		13.06	0.3	0.12	97.87								1.28604	0.31	0.363115	1.6147	16.0702	8.6756	48.9026	0.0514	0.4968	12.8273	0.0552	0.0062	9.1323	0.207	0.0828		1-B-plg	1.87	32.23	0.23
		(a)	51.56	37.43	1900-2700	20VII-L12	1-B-2-MI2	segment 27	487	1.47	8.76	12.77	49.64	0.07	0.81	11.43		0.01	13.24	0.25	0.01	98.51								1.30479	0.32	0.373616	1.598	16.2704	8.7572	49.064	0.0508	0.5508	12.9436	0	0.0132	9.128	0.17	0.0068		1-B-plg	1.87	32.23	0.23
		(a)	51.56	37.43	1900-2700	20VII-L12	1-D-MI2	segment 27	622	1.36	8.54	12.83	50.17	0.07	0.91	11.25	0.03	0.05	13.3	0.24	0.06	98.84								1.31733	0.32	0.358449	1.4656	16.3096	8.7884	49.3604	0.0476	0.6316	12.9524	0.03	0.034	9.1944	0.1632	0.0472		1-D-plg	1.69	32.82	0.2
		(a)	51.56	37.43	1900-2700	20VII-L12	1-D-MI3	segment 27	623	1.81	9.01	11.89	48.39	0.08	0.79	11.35		0.01	12.8	0.27	0.04	96.43								1.25971	0.3	0.299726	1.774	16.153	8.383	48.165	0.056	0.565	12.916	0.009	0.007	9.101	0.189	0.034		1-D-plg	1.69	32.82	0.2
		(a)	51.56	37.43	1900-2700	20VII-L12	1-D-MI4	segment 27	624	2.04	8.98	12.45	49.5	0.08	0.75	11.62	0.03	0.04	13.16	0.32		98.97								1.29399	0.32	0.285505	1.928	16.6088	8.53	48.9048	0.0544	0.5228	13.204	0.03	0.0272	9.0992	0.2176	0.0064		1-D-plg	1.69	32.82	0.2
		(a)	51.56	37.43	1900-2700	20VII-L12	2-A-MI1	segment 27	607	2.47	14.66	8.76	48.51	0.11	1.03	11.79	0.01	0.08	8.58	0.14	0.01	96.19								0.804229	0.06	0.211187	2.4286	15.689	8.2482	48.459	0.1046	0.9694	12.057	0.0112	0.0764	8.0814	0.1322	0.0118		2-A-plg	1.78	31.81	0.23
		(a)	51.56	37.43	1900-2700	20VII-L12	2-A-MI10	segment 27	617	2.9	15.68	8.51	49.47	0.05	0.72	12.07	0.01	0.1	8.61	0.17		98.3								0.76977	0.03	0.186605	2.8679	16.1636	8.2607	49.4115	0.0485	0.7002	12.1996	0.01	0.097	8.3634	0.1652	0		2-A-MI10-plg	1.83	31.8	0.2
		(a)	51.56	37.43	1900-2700	20VII-L12	2-A-MI2	segment 27	609	2.75	13.51	9.96	50.15	0.09	0.44	11.11	0.04	0.01	9.9	0.16	0.08	98.24								0.822354	0.15	0.195704	2.6045	16.255	8.5005	49.7765	0.0795	0.377	11.8795	0.0385	0.0115	8.4555	0.1375	0.074		2-A-plg	1.78	31.81	0.23
		(a)	51.56	37.43	1900-2700	20VII-L12	2-A-MI3	segment 27	610	2.44	14.32	9.3	50.75	0.07	0.63	11.16	0.04	0.04	9.37	0.17	0.06	98.38								0.77933	0.11	0.209579	2.3674	16.2439	8.3023	50.4101	0.0645	0.5629	11.7188	0.0389	0.0378	8.369	0.1524	0.0578		2-A-plg	1.78	31.81	0.23
		(a)	51.56	37.43	1900-2700	20VII-L12	2-A-MI4	segment 27	611	2.84	13.23	9.82	50.28	0.07	0.4	10.99		0.03	9.48	0.22	0.07	97.48								0.830688	0.13	0.177809	2.7022	15.6454	8.5733	49.9394	0.0635	0.3506	11.6725	0.0039	0.0287	8.2827	0.1927	0.0661		2-A-plg	1.78	31.81	0.23
		(a)	51.56	37.43	1900-2700	20VII-L12	2-A-MI5	segment 27	612	1.98	13.81	9.75	50.84	0.08	0.5	11.03	0.09		9.53	0.18	0.01	97.86								0.798697	0.13	0.252121	1.954	16.15	8.5124	50.4266	0.0722	0.4376	11.7073	0.0822	0.0026	8.3262	0.1579	0.0139		2-A-plg	1.78	31.81	0.23
		(a)	51.56	37.43	1900-2700	20VII-L12	2-A-MI6	segment 27	613	2.14	12.62	10.42	50.71	0.08	0.41	10.93	0.01	0.03	9.69	0.3	0.02	97.44								0.866086	0.17	0.236656	2.0788	15.8823	8.6877	50.1915	0.0698	0.3437	11.8327	0.0134	0.0283	8.0886	0.2507	0.0234		2-A-plg	1.78	31.81	0.23
		(a)	51.56	37.43	1900-2700	20VII-L12	2-A-MI7	segment 27	614	2.2	13.16	10.15	48.95	0.13	0.9	11.38	0.01	0.09	9.1	0.29	0.01	96.4								0.864742	0.17	0.252492	2.1286	16.3305	8.4636	48.7307	0.1113	0.7504	12.2062	0.0134	0.0781	7.5989	0.2424	0.0151		2-A-plg	1.78	31.81	0.23
		(a)	51.56	37.43	1900-2700	20VII-L12	2-A-MI8	segment 27	615	2.05	13.71	9.65	50.32	0.09	0.37	11.35		0.02	9.39	0.21	0.03	97.37								0.827863	0.14	0.255566	2.0122	16.244	8.3312	49.9476	0.0802	0.321	12.0346	0.0042	0.02	8.1132	0.182	0.0314		2-A-plg	1.78	31.81	0.23
		(a)	51.56	37.43	1900-2700	20VII-L12	2-A-MI9	segment 27	616	2.03	13.29	9.82	50.09	0.08	0.45	11.21	0.03	0	9.48	0.19	0.04	96.75								0.843491	0.14	0.250508	1.995	15.8828	8.4774	49.7498	0.0716	0.3898	11.9142	0.03	0.0028	8.1906	0.1648	0.04		2-A-plg	1.78	31.81	0.23
		(a)	51.56	37.43	1900-2700	20VII-L12	2-D-MI1	segment 27	489	3.34	16.56	6.75	50.63	0.08	1.11	11.46	0.01	0.09	9.05	0.17	0.04	99.31								0.692029	-0.13	0.174443	3.4609	14.6464	7.6002	50.8263	0.0891	1.253	10.9777	0.01	0.1017	10.1615	0.1921	0.0452		2-D-MI1-plg	2.41	31.28	0.21
		(a)	51.56	37.43	1900-2700	20VII-L12	2-E-2-MI1	segment 27	634	2.84	15.95	7.8	49.53	0.05	0.5	11.88		0.04	8.79	0.16	0.05	97.6								0.744828	-0.05	0.16251	2.8925	15.135	8.1815	49.616	0.052	0.525	11.6575	0	0.0415	9.211	0.166	0.049		2-E-2-plg	1.79	32.25	0.17
		(a)	51.56	37.43	1900-2700	20VII-L12	2-E-2-MI3	segment 27	635	2.49	14.84	7.8	50.35	0.13	0.98	11.65	0.02	0.08	8.4	0.13	0.01	96.86								0.78504	0	0.182284	2.49	14.84	7.8	50.35	0.13	0.98	11.65	0.02	0.08	8.4	0.13	0.01		2-E-2-plg	1.79	32.25	0.17
		(a)	51.56	37.43	1900-2700	20VII-L12	2-E-2-MI5	segment 27	636	2.47	15.11	8.05	50.65	0.11	1.04	11.74	0.08	0.1	8.87	0.19		98.4								0.776969	0	0.187432	2.47	15.11	8.05	50.65	0.11	1.04	11.74	0.08	0.1	8.87	0.19	0		2-E-2-plg	1.79	32.25	0.17
		(a)	51.56	37.43	1900-2700	20VII-L12	2-E-3-MI1	segment 27	638	3.12	15.65	8.76	52.96	0.07	0.49	11.17	0.01	0.03	8.63	0.12	0.06	101.06								0.713738	0.01	0.194632	3.112	15.8105	8.6753	52.9238	0.0694	0.4852	11.213	0.0101	0.0297	8.5472	0.1188	0.0594		2-E-3-plg	2.32	31.7	0.29
		(a)	51.56	37.43	1900-2700	20VII-L12	2-E-3-MI3	segment 27	639	3.13	15.31	8.39	52.31	0.09	0.41	11.08	0.02	0.03	8.07	0.21	0.02	99.05								0.72371	0.03	0.197519	3.1057	15.8017	8.147	52.2209	0.0876	0.398	11.2117	0.02	0.0291	7.8384	0.2037	0.0194		2-E-3-plg	2.32	31.7	0.29
		(a)	51.56	37.43	1900-2700	20VII-L12	2-F-MI1a	segment 27	577	2.71	14.58	8.06	50.61	0.08	0.72	11.53	0.02	0.02	9.35	0.23	0.06	97.98								0.790809	0.03	0.211791	2.6929	15.0855	7.8239	50.5431	0.0779	0.699	11.6545	0.0194	0.0194	9.0836	0.2231	0.0588		2-F-MI1-plg	2.14	31.43	0.19
		(a)	51.56	37.43	1900-2700	20VII-L12	2-F-MI1b	segment 27	578	2.66	14.38	7.92	50.68	0.08	0.74	11.54	0.06		9.45	0.19		97.69								0.802503	0.03	0.212793	2.6444	14.8915	7.6881	50.611	0.0779	0.7184	11.6642	0.0582	0	9.1806	0.1843	0.0006		2-F-MI1-plg	2.14	31.43	0.19
		(a)	51.56	37.43	1900-2700	20VII-L12	2-F-MI2	segment 27	580	2.67	14.88	7.88	50.6	0.23	0.75	10.93	0.03	0.04	9.01	0.15	0.03	97.2								0.734543	0.01	0.206007	2.6653	15.0461	7.8032	50.5734	0.2278	0.7426	10.9782	0.03	0.0399	8.9244	0.1485	0.0297		2-F-MI2-plg	2.2	31.49	0.2
		(a)	51.56	37.43	1900-2700	20VII-L12	2-G-MI1	segment 27	574	2.14	13.56	12.38	48.33	0.06	0.5	11.34			9.5	0.14	0.04	97.98								0.836283	0.1	0.170848	2.056	15.506	11.161	48.143	0.055	0.45	11.916	0	0.001	8.573	0.127	0.037		2-G-plg	1.3	33.02	0.19
		(a)	51.56	37.43	1900-2700	20VII-L12	3-A-MI1	segment 27	566	3.18	14.94	8.91	50.52	0.04	0.58	11.64		0.03	8.7	0.24	0.11	98.94								0.779116	0.04	0.17086	3.1316	15.632	8.5612	50.4152	0.0392	0.5576	11.8228	0.002	0.0292	8.3656	0.232	0.1056		3-A-MI1-plg	1.97	32.24	0.19
		(a)	51.56	37.43	1900-2700	20VII-L12	3-A-MI2	segment 27	567	3.13	15.11	8.88	50.25	0.06	0.58	11.61		0.01	8.29	0.15	0.04	98.15								0.768365	0.04	0.175808	3.0836	15.7952	8.5324	50.156	0.0584	0.5576	11.794	0.002	0.01	7.972	0.1456	0.0384		3-A-MI1-plg	1.97	32.24	0.19
		(a)	51.56	37.43	1900-2700	20VII-L12	3-A-MI3	segment 27	568	3.08	14.94	9.03	50.08	0.05	0.56	11.59		0.03	9.13	0.19	0.05	98.74								0.77577	0.06	0.183874	3.0134	15.978	8.4996	49.9492	0.0482	0.5276	11.8672	0.003	0.0288	8.6026	0.181	0.047		3-A-MI1-plg	1.97	32.24	0.19
		(a)	51.56	37.43	1900-2700	20VII-L12	3-A-MI4	segment 27	569	2.89	14.93	8.75	49.85	0.06	0.66	11.77		0.03	8.41	0.14	0.07	97.55								0.788346	0.05	0.195396	2.844	15.7955	8.322	49.7525	0.058	0.628	11.992	0.0025	0.029	8.0065	0.135	0.0665		3-A-MI1-plg	1.97	32.24	0.19
		(a)	51.56	37.43	1900-2700	20VII-L12	3-A-MI5	segment 27	570	2.5	14.98	9.17	51.4	0.07	0.5	11.43		0.04	8.44	0.25	0.05	98.82								0.763017	0.05	0.212967	2.4735	15.843	8.721	51.225	0.0675	0.476	11.669	0.0025	0.0385	8.035	0.2395	0.0475		3-A-MI1-plg	1.97	32.24	0.19
		(a)	51.56	37.43	1900-2700	20VII-L12	3-A-MI6	segment 27	571	3.07	14.7	9.25	50.95	0.05	0.39	11.24		0.04	9.12	0.12	0.09	99.02								0.764626	0.08	0.180902	2.982	16.1032	8.5252	50.706	0.0476	0.3604	11.6376	0.004	0.0376	8.4176	0.1136	0.0828		3-A-MI1-plg	1.97	32.24	0.19
		(a)	51.56	37.43	1900-2700	20VII-L12	3-A-MI7	segment 27	491	3.03	16	8.56	50.3	0.06	0.73	11.96		0.08	8.47	0.12	0.09	99.4								0.7475	0.03	0.189171	2.997	16.4923	8.3098	50.2322	0.0585	0.7081	12.0899	0.003	0.0776	8.2264	0.1176	0.0888		3-A-MI7-plg	1.93	32.41	0.22
		(a)	51.56	37.43	1900-2700	20VII-L12	3-B-MI1	segment 27	631	2.49	15.8	8.41	49.83	0.14	1.01	11.9	0.01	0.11	8.47	0.15	0.03	98.43								0.753165	0.02	0.209704	2.4766	16.1416	8.2464	49.7928	0.1384	0.9904	11.9894	0.0098	0.1084	8.309	0.1476	0.0296		3-B-MI1-plg	1.82	32.88	0.23
		(a)	51.56	37.43	1900-2700	20VII-L12	3-C-MI1	segment 27	626	2.21	13.91	7.93	48.09	0.17	1.07	11.2		0.15	10.33	0.17		95.22								0.805176	0.03	0.241061	2.2064	14.45	7.6978	48.0813	0.1649	1.0388	11.3467	0	0.1455	10.0345	0.1652	0.0012		3-C-MI5-plg	2.09	31.91	0.19
		(a)	51.56	37.43	1900-2700	20VII-L12	3-C-MI2	segment 27	627	3.14	13.67	8.26	49.07	0.45	1.1	11.01	0.04	0.09	9.36	0.25	0.02	96.47								0.805413	0.05	0.169317	3.0875	14.582	7.8565	49.0065	0.4275	1.0465	11.264	0.038	0.0855	8.916	0.238	0.021		3-C-MI5-plg	2.09	31.91	0.19
		(a)	51.56	37.43	1900-2700	20VII-L12	3-C-MI3	segment 27	628	2.2	14.75	7.52	49.36	0.24	0.94	11.21		0.05	10.24	0.22		96.72								0.76	0	0.237493	2.2	14.75	7.52	49.36	0.24	0.94	11.21	0	0.05	10.24	0.22	0		3-C-MI5-plg	2.09	31.91	0.19
		(a)	51.56	37.43	1900-2700	20VII-L12	3-C-MI5	segment 27	629	3.01	15.88	7.24	49.55	0.05	1.02	11.39	0.04	0.11	9.39	0.22		97.89								0.717254	-0.06	0.169817	3.0652	14.9182	7.663	49.655	0.053	1.0794	11.108	0.0424	0.1166	9.9246	0.2326	-0.0024		3-C-MI5-plg	2.09	31.91	0.19
		(a)	51.56	37.43	1900-2700	20VII-L12	3-E-MI2	segment 27	584	2.92	12.43	8.91	48.98	0.26	1.18	10.33	0.04	0.05	11.46	0.18	0.09	96.82								0.831054	0.11	0.180835	2.8265	14.5354	7.9497	48.8183	0.2325	1.0535	10.935	0.0356	0.0456	10.2346	0.1701	0.0856		3-E-MI2-plg	2.07	31.57	0.18
		(a)	51.56	37.43	1900-2700	20VII-L12	3-E-MI3	segment 27	586	2.31	12.17	8.43	49.18	0.11	0.74	10.48			11.34	0.23	0	94.98								0.861134	0.11	0.222142	2.2836	14.304	7.5225	48.9963	0.099	0.6619	11.0685	0	0.0011	10.1278	0.2146	0.0055		3-E-MI2-plg	2.07	31.57	0.18
		(a)	51.56	37.43	1900-2700	20VII-L12	3-F-MI1	segment 27	484	2.6	14.57	7.77	48.63	0.14	1.01	11.39	0.03	0.07	9.14	0.19		95.53								0.781743	0	0.161305	2.6	14.57	7.77	48.63	0.14	1.01	11.39	0.03	0.07	9.14	0.19	0		3-F-MI1-plg	1.7	31.33	0.15
		(a)	51.56	37.43	1900-2700	20VII-L12	3-G-MI3	segment 27	591	2.62	13.47	8.84	49.15	0.06	1.17	10.97		0.1	11.14	0.17	0.04	97.78								0.814402	0.09	0.194979	2.5552	15.1287	8.0588	49.0042	0.0564	1.0656	11.4416	0.0036	0.091	10.1779	0.1556	0.04		3-G-MI2-plg	1.9	31.9	0.16
		(a)	51.56	37.43	1900-2700	20VII-L12	3-G-MI4	segment 27	592	2.62	14.87	8.26	48.4	0.13	1.05	11.51	0.03	0.08	10.18	0.22		97.35								0.774042	0.04	0.21564	2.594	15.5528	7.9372	48.388	0.1252	1.0088	11.6848	0.0288	0.078	9.7892	0.212	0.0024		3-G-MI4-plg	1.97	31.94	0.19
		(a)	51.56	37.43	1900-2700	20VII-L12	4-A-MI1	segment 27	594	2.44	13.56	9.14	51.43	0.13	1.02	11.37		0.11	7.86	0.2	0	97.27								0.838496	0.1	0.220962	2.396	15.436	8.246	51.108	0.117	0.919	11.863	0.001	0.1	7.111	0.18	0		4-A-MI1-plg	2	32.32	0.2
		(a)	51.56	37.43	1900-2700	20VII-L12	4-A-MI2	segment 27	596	2.3	13.52	9.03	51.02	0.12	1.5	11.7	0.04	0.11	7.55	0.26		97.15								0.865385	0.1	0.206853	2.243	15.457	8.146	50.659	0.109	1.356	12.202	0.038	0.099	6.835	0.237	0		4-A-MI2-plg	1.73	32.89	0.19
		(a)	51.56	37.43	1900-2700	20VII-L12	4-B-MI2	segment 27	600	2.74	13.89	7.55	51.34	0.07	0.81	11.62		0.06	9.66	0.21	0.04	98.02								0.836573	0.01	0.160672	2.7313	14.0694	7.4763	51.3041	0.0695	0.8019	11.6674	0.0003	0.0597	9.5674	0.208	0.0396		4-B-MI2-plg	1.87	31.83	0.18
		(a)	51.56	37.43	1900-2700	20VII-L12	4-B-MI4	segment 27	604	2.85	14.18	7.74	50.88	0.07	1.04	11.89	0.01	0.1	9.28	0.18	0.13	98.38								0.838505	0.02	0.161427	2.8292	14.532	7.5896	50.8078	0.0692	1.0192	11.9786	0.0098	0.0984	9.1018	0.1764	0.1284		4-B-MI3-plg	1.81	31.78	0.22
		(a)	51.56	37.43	1900-2700	20VII-L12	5-A-MI1	segment 27	641	2.56	16	8	48.96	0.12	0.55	12.21		0.06	8.24	0.21		97								0.763125	-0.05	0.164102	2.607	15.1845	8.39	49.0515	0.126	0.576	11.9795	-0.0015	0.062	8.6385	0.2205	-0.0015		5-A-MI1-plg	1.62	32.31	0.2
		(a)	51.56	37.43	1900-2700	20VII-L12	5-A-MI10	segment 27	678	2.63	12.89	9.63	50.25	0.08	0.41	12.09		0.01	9.33	0.16	0.05	97.65								0.937936	0.16	0.19306	2.4684	15.9972	8.1212	49.7508	0.0672	0.3492	12.8468	0.0048	0.0116	7.8804	0.1344	0.0468		5-A-MI1-plg	1.62	32.31	0.2
		(a)	51.56	37.43	1900-2700	20VII-L12	5-A-MI11	segment 27	679	2.72	13.41	9.39	49.69	0.06	0.54	12.34	0.05	0.05	9.75	0.17	0.02	98.35								0.920209	0.13	0.185969	2.577	15.867	8.1953	49.3572	0.0522	0.4737	12.9224	0.0474	0.0461	8.5176	0.1479	0.0213		5-A-MI1-plg	1.62	32.31	0.2
		(a)	51.56	37.43	1900-2700	20VII-L12	5-A-MI12	segment 27	680	2.26	13.14	9.49	50.39	0.09	0.59	12.06	0.05	0.02	10.17	0.08	0.06	98.5								0.917808	0.13	0.210217	2.1768	15.6321	8.2823	49.9662	0.0783	0.5172	12.6788	0.0474	0.02	8.883	0.0696	0.0561		5-A-MI1-plg	1.62	32.31	0.2
		(a)	51.56	37.43	1900-2700	20VII-L12	5-A-MI13	segment 27	681	2.43	12.62	9.38	50.21	0.07	0.48	12.11		0	9.46	0.21	0.05	97.19								0.959588	0.13	0.192405	2.3247	15.1797	8.1866	49.8096	0.0609	0.4215	12.7223	0.0039	0.0026	8.2653	0.1827	0.0474		5-A-MI1-plg	1.62	32.31	0.2
		(a)	51.56	37.43	1900-2700	20VII-L12	5-A-MI14	segment 27	682	2.23	13.16	9.29	50.24	0.17	0.52	12.13	0.03	0.01	10.05	0.16	0.04	98.18								0.921733	0.13	0.214589	2.1507	15.6495	8.1083	49.8357	0.1479	0.4563	12.7397	0.03	0.0113	8.7786	0.1392	0.0387		5-A-MI1-plg	1.62	32.31	0.2
		(a)	51.56	37.43	1900-2700	20VII-L12	5-A-MI2	segment 27	670	2.59	13.07	9.11	50.14	0.06	0.54	12.21	0.02	0	9.64	0.17	0.02	97.68								0.9342	0.1	0.176402	2.493	14.994	8.219	49.839	0.054	0.489	12.671	0.021	0.002	8.703	0.153	0.021		5-A-MI1-plg	1.62	32.31	0.2
		(a)	51.56	37.43	1900-2700	20VII-L12	5-A-MI3	segment 27	671	2.36	13.06	9.32	50.24	0.06	0.51	12.13	0.02	0.01	9.38	0.21	0.05	97.53								0.92879	0.13	0.202735	2.2638	15.5625	8.1344	49.8357	0.0522	0.4476	12.7397	0.0213	0.0113	8.1957	0.1827	0.0474		5-A-MI1-plg	1.62	32.31	0.2
		(a)	51.56	37.43	1900-2700	20VII-L12	5-A-MI4	segment 27	672	2.27	13.2	9.33	50.63	0.08	0.4	12.16	0.04	0	9.83	0.23	0.1	98.34								0.921212	0.13	0.210641	2.1855	15.6843	8.1431	50.175	0.0696	0.3519	12.7658	0.0387	0.0026	8.5872	0.2001	0.0909		5-A-MI1-plg	1.62	32.31	0.2
		(a)	51.56	37.43	1900-2700	20VII-L12	5-A-MI5	segment 27	673	2.27	13.17	9.46	50.93	0.07	0.41	12.16		0.02	9.97	0.25	0.01	98.81								0.923311	0.13	0.209202	2.1855	15.6582	8.2562	50.436	0.0609	0.3606	12.7658	0.0039	0.02	8.709	0.2175	0.0126		5-A-MI1-plg	1.62	32.31	0.2
		(a)	51.56	37.43	1900-2700	20VII-L12	5-A-MI6	segment 27	674	2.06	13.25	9.66	50.55	0.18	0.51	12.15	0.11	0	9.72	0.19	0.1	98.6								0.916981	0.13	0.230657	2.0028	15.7278	8.4302	50.1054	0.1566	0.4476	12.7571	0.0996	0.0026	8.4915	0.1653	0.0909		5-A-MI1-plg	1.62	32.31	0.2
		(a)	51.56	37.43	1900-2700	20VII-L12	5-A-MI7	segment 27	675	2.3	12.06	10.42	49.65	0.12	0.63	11.85	0.01	0.08	10.04	0.21	0.03	97.5								0.982587	0.2	0.224449	2.164	16.11	8.376	49.146	0.096	0.51	12.844	0.014	0.068	8.086	0.168	0.03		5-A-MI1-plg	1.62	32.31	0.2
		(a)	51.56	37.43	1900-2700	20VII-L12	5-A-MI8	segment 27	676	2.21	13.04	9.83	50.95	0.07	0.4	11.99		0.02	9.61	0.15	0.06	98.47								0.919479	0.15	0.218636	2.1215	15.9305	8.3855	50.377	0.0595	0.3445	12.7145	0.0045	0.02	8.209	0.1275	0.0555		5-A-MI1-plg	1.62	32.31	0.2
		(a)	51.56	37.43	1900-2700	20VII-L12	5-A-MI9	segment 27	677	2.69	13.18	9.59	50.61	0.08	0.4	12.15	0	0.02	9.86	0.29	0.06	99.13								0.921851	0.15	0.187794	2.5295	16.0495	8.1815	50.088	0.068	0.3445	12.8505	0.0045	0.02	8.4215	0.2465	0.0555		5-A-MI1-plg	1.62	32.31	0.2
		(a)	51.56	37.43	1900-2700	20VII-L12	5-B-1-MI1	segment 27	455	2.28	14.05	9.55	50.89	0.15	0.86	11.56	0.05	0.08	9.61	0.18	0.03	99.39								0.822776	0.12	0.241238	2.2308	16.264	8.4292	50.5588	0.1332	0.7616	12.1264	0.0524	0.0716	8.4976	0.1584	0.0264		5-B-1-MI1-plg	1.87	32.5	0.21
		(a)	51.56	37.43	1900-2700	20VII-L12	5-B-1-MI1	segment 27	456	2.37	13.92	9.31	50.44	0.14	0.95	11.57		0.07	9.59	0.21	0.13	98.77								0.831178	0.12	0.233324	2.31	16.1496	8.218	50.1628	0.1244	0.8408	12.1352	0.0084	0.0628	8.48	0.1848	0.1144		5-B-1-MI1-plg	1.87	32.5	0.21
		(a)	51.56	37.43	1900-2700	20VII-L12	5-B-1-MI2	segment 27	458	2.29	13.83	9.18	50.17	0.06	0.83	11.54	0.04	0.06	9.66	0.05		97.77								0.834418	0.12	0.234384	2.2372	16.0536	8.1	49.8964	0.054	0.7316	12.1388	0.0352	0.0564	8.538	0.044	0.0048		5-B-1-MI2-plg	1.85	32.36	0.18
		(a)	51.56	37.43	1900-2700	20VII-L12	5-B-1-MI2	segment 27	460	2.66	13.58	9.48	50.5	0.07	0.7	11.56		0.03	9.38	0.19		98.22								0.851252	0.12	0.200925	2.5628	15.8336	8.364	50.1868	0.0628	0.6172	12.1564	0	0.03	8.2916	0.1672	0.0048		5-B-1-MI2-plg	1.85	32.36	0.18
		(a)	51.56	37.43	1900-2700	20VII-L12	5-B-1-MI3	segment 27	461	2.62	13.78	9.6	50.76	0.07	0.76	11.47	0.01	0.07	10.06	0.16		99.43								0.832366	0.12	0.206897	2.5264	15.9856	8.472	50.4312	0.0616	0.67	12.0376	0.0088	0.0616	8.9056	0.1408	0.0048		5-B-1-MI3-plg	1.84	32.16	0.2
		(a)	51.56	37.43	1900-2700	20VII-L12	5-B-2-MI1	segment 27	463	2.59	13.82	9.96	49.81	0.07	0.87	12.22	0.04	0.07	9.25	0.1	0.09	99.01								0.884226	0.14	0.248226	2.5018	16.3456	8.595	49.6182	0.0616	0.751	12.7422	0.0386	0.0644	8.0026	0.086	0.0802		5-B-2-MI1-plg	1.96	31.86	0.21
		(a)	51.56	37.43	1900-2700	20VII-L12	5-B-2-MI5	segment 27	464	2.13	15.41	9.11	50.16	0.09	0.89	12.3		0.03	8.64	0.21	0.04	99.1								0.798183	0.08	0.262749	2.1036	16.7732	8.3996	49.9832	0.0836	0.8228	12.6424	0	0.03	7.9744	0.1972	0.0368		5-B-2-MI5-plg	1.8	32.45	0.23
		(a)	51.56	37.43	1900-2700	20VII-L12	5-B-3-MI1	segment 27	476	2.17	11.66	12.16	50.57	0.03	0.3	12.23	0.03	0	9.34	0.11	0.12	98.84								1.04889	0.22	0.263818	2.082	16.1986	9.5332	49.8792	0.0234	0.2362	13.1738	0.0234	0.0022	7.36	0.088	0.1002		5-B-3-MI5-plg	1.77	32.29	0.22
		(a)	51.56	37.43	1900-2700	20VII-L12	5-B-3-MI2	segment 27	477	2.26	11.97	11.91	50.21	0.04	0.23	12.13	0.04		9.03	0.17	0.08	98.28								1.01337	0.22	0.258947	2.1522	16.4404	9.3382	49.5984	0.0312	0.1816	13.0958	0.0312	0.0022	7.1182	0.1348	0.069		5-B-3-MI5-plg	1.77	32.29	0.22
		(a)	51.56	37.43	1900-2700	20VII-L12	5-B-3-MI3	segment 27	478	2.18	12.1	11.87	50.27	0.03	0.34	12.02	0.02	0.03	9.09	0.19	0.02	98.29								0.993388	0.22	0.266315	2.0898	16.5418	9.307	49.6452	0.0234	0.2674	13.01	0.0156	0.0256	7.165	0.1504	0.0222		5-B-3-MI5-plg	1.77	32.29	0.22
		(a)	51.56	37.43	1900-2700	20VII-L12	5-B-3-MI4	segment 27	467	2.23	13.38	10.61	49.85	0.03	0.48	12.79		0.08	8.58	0.22		98.39								0.955904	0.18	0.273383	2.1472	16.7838	8.7398	49.4144	0.0246	0.3954	13.4614	0	0.0674	7.0968	0.1822	0.0054		5-B-3-MI5-plg	1.77	32.29	0.22
		(a)	51.56	37.43	1900-2700	20VII-L12	5-B-3-MI5	segment 27	468	2.24	13.07	10.7	50.03	0.03	0.44	12.7	0.03	0.05	8.66	0.2	0.06	98.32								0.971691	0.18	0.265953	2.1554	16.5296	8.8136	49.562	0.0246	0.3626	13.3876	0.0246	0.0428	7.1624	0.1658	0.0546		5-B-3-MI5-plg	1.77	32.29	0.22
		(a)	51.56	37.43	1900-2700	20VII-L12	5-B-3-MI6	segment 27	470	2.43	13.37	10.45	49.68	0.02	0.55	12.74		0.05	8.94	0.16	0.1	98.62								0.95288	0.18	0.253803	2.3112	16.7756	8.6086	49.275	0.0164	0.4528	13.4204	0	0.0428	7.392	0.133	0.0874		5-B-3-MI5-plg	1.77	32.29	0.22
		(a)	51.56	37.43	1900-2700	20VII-L12	5-B-3-MI7	segment 27	469	2.28	12.73	11.14	49.71	0.03	0.5	12.65		0.02	9	0.26	0.02	98.48								0.993716	0.2	0.214002	2.1	16.726	8.962	49.09	0.024	0.406	13.53	0.008	0.016	7.278	0.216	0.02		5-B-3-MI7-plg	1.38	32.71	0.25
		(a)	51.56	37.43	1900-2700	20VII-L12	5-B-3-MI8	segment 27	471	2.5	13.65	10.65	49.66	0.02	0.5	12.21		0.03	8.35	0.2	0.08	98.09								0.894505	0.18	0.197616	2.3056	17.0592	8.7762	49.0948	0.0164	0.4118	13.0974	0.0018	0.0282	6.9046	0.164	0.071		5-B-3-MI8-plg	1.42	32.59	0.24
		(a)	51.56	37.43	1900-2700	20VII-L12	5-B-3-MI9	segment 27	472	2.54	13.09	10.95	49.5	0.03	0.49	12.01	0.03	0.02	8.75	0.22	0.11	97.87								0.917494	0.18	0.187727	2.3384	16.6	9.0222	48.9636	0.0246	0.4036	12.9334	0.0264	0.02	7.2326	0.1804	0.0956		5-B-3-MI8-plg	1.42	32.59	0.24
		(a)	51.56	37.43	1900-2700	20VII-L12	5-E-MI1	segment 27	650	2.76	14.28	10.29	50.15	0.03	0.64	12.49		0.05	9.43	0.16	0.05	100.51								0.87465	0.16	0.179071	2.544	17.3712	8.6724	49.75	0.0252	0.5424	13.2644	0	0.0436	7.9564	0.1376	0.0452		5-E-MI1-plg	1.41	33.6	0.18
		(a)	51.56	37.43	1900-2700	20VII-L12	5-F-MI2	segment 27	652	2.99	13.3	9.25	48.92	0.04	0.94	11.59		0.07	10.18	0.16	0	97.51								0.871429	0.14	0.186386	2.8262	15.8816	7.9844	48.6652	0.0344	0.8182	12.2998	0.0042	0.0602	8.8038	0.1376	0		5-F-MI2-plg	1.82	31.74	0.21
		This study	63.9358	27.849	2958	30I-TVG02-1	30I-2-1-1	Mountain Jourdanne	14	4.033	15.902	6.889	51.263	0.293	1.087	10.242		0.158	7.328	0.143	0.066	97.404	2.13588	0.00365878	0.871079	0.00161629			re-homogenized MI	0.64407	0.054	0.289969	4.02976	16.6849	6.52796	51.2316	0.278744	1.03197	10.4234		0.149954	6.94676	0.136628	0.062436		15	3.973	30.401	0.203
		This study	63.9358	27.849	2958	30I-TVG02-1	30I-2-1-2	Mountain Jourdanne	16	4.314	15.85	6.874	51.26	0.284	1.125	10.113		0.193	7.528	0.145	0.021	97.707	2.11	0.00322186	0.870649	0.00169113			re-homogenized MI	0.638044	0.054	0.250986	4.28743	16.6315	6.51096	51.2514	0.269744	1.067	10.3241		0.182578	7.13753	0.13717	0.020028		17	3.822	30.322	0.151
		This study	63.9358	27.849	2958	30I-TVG02-1	30I-2-1-3	Mountain Jourdanne	18	4.512	15.881	6.771	51.1	0.294	1.132	9.819		0.218	7.907	0.159	0.025	97.818							re-homogenized MI	0.618286	0.05	0.230497	4.47605	16.6034	6.4414	51.0782	0.282	1.0776	10.0347		0.2071	7.52875	0.15145	0.0238		19	3.793	30.329	0.179
		This study	63.9358	27.849	2958	30I-TVG02-1	30I-2-1-4	Mountain Jourdanne	20	4.677	16.004	6.185	49.868	0.369	1.521	9.782		0.188	8.888	0.177	0.017	97.676							re-homogenized MI	0.611222	0.014	0.174946	4.6566	16.2187	6.10026	49.8624	0.3641	1.50024	9.85407		0.185368	8.7682	0.174956	0.016762		21	3.22	31.343	0.132
		This study	63.9358	27.849	2958	30I-TVG02-1	30I-2-1-5	Mountain Jourdanne	22	4.347	15.849	6.879	50.684	0.279	0.9	10.216		0.111	7.777	0.144	0.031	97.217	2.12404	0.00447015	0.871911	0.00250516			re-homogenized MI	0.644583	0.056	0.233178	4.30265	16.6732	6.50324	50.6398	0.265672	0.85156	10.4483		0.105008	7.3593	0.136328	0.029264		23	3.555	30.566	0.169
		This study	63.9358	27.849	2958	30I-TVG02-1	30I-2-1-6-1	Mountain Jourdanne	24	4.348	15.875	6.87	51.801	0.335	0.958	9.996		0.202	7.623	0.113	0.047	98.168	2.12623	0.0040111	0.869814	0.00194436			re-homogenized MI	0.629669	0.055	0.286975	4.34239	16.6377	6.50276	51.796	0.319655	0.90718	10.1675		0.19111	7.2221	0.106785	0.044415		26	4.246	29.742	0.193
		This study	63.9358	27.849	2958	30I-TVG02-1	30I-2-1-6-2	Mountain Jourdanne	25	4.345	15.886	7.116	50.566	0.31	1.063	9.889		0.253	7.946	0.182	0.003	97.559	2.11883	0.00299551	0.870151	0.00162453			re-homogenized MI	0.622498	0.066	0.294742	4.33847	16.8005	6.65908	50.6415	0.293236	0.995086	10.1018		0.236566	7.44361	0.169988	0.002802		26	4.246	29.742	0.193
		This study	63.9358	27.849	2958	30I-TVG02-1	30I-2-1-7	Mountain Jourdanne	27	4.241	15.761	6.891	50.882	0.295	0.929	10.289		0.146	7.624	0.129	0.046	97.233	2.09145	0.00402531	0.838246	0.00215229			re-homogenized MI	0.652814	0.062	0.251875	4.20337	16.6624	6.47554	50.8482	0.278756	0.872332	10.5152		0.137506	7.17047	0.12218	0.043148		28	3.634	30.3	0.19
		This study	63.9358	27.849	2958	30I-TVG02-1	30I-2-1-8	Mountain Jourdanne	29	4.049	15.819	7.695	50.277	0.291	1.027	10.435		0.128	7.538	0.143	0.055	97.457	2.12673	0.00392611	0.868834	0.00182464			re-homogenized MI	0.65965	0.094	0.261561	3.99486	17.2069	6.98709	50.2375	0.267688	0.930744	10.8184		0.117566	6.85302	0.129652	0.050676		30	3.473	30.584	0.164
		This study	63.9358	27.849	2958	30I-TVG02-1	30I-2-1-9-1	Mountain Jourdanne	31	4.427	15.937	6.439	50.847	0.298	1.213	10.156		0.235	7.61	0.175	0.013	97.35	2.15549	0.00483237	0.870454	0.00221526			re-homogenized MI	0.637259	0.03	0.29187	4.42475	16.3618	6.2512	50.8648	0.2902	1.17745	10.2439		0.229	7.39097	0.16975	0.01261		33	4.352	30.098	0.179
		This study	63.9358	27.849	2958	30I-TVG02-1	30I-2-1-9-2	Mountain Jourdanne	32	4.419	15.9	6.361	50.919	0.316	1.202	10.083		0.192	7.923	0.132	0	97.447	2.13444	0.00426222	0.870296	0.0022101			re-homogenized MI	0.634151	0.03	0.289328	4.41699	16.3259	6.17554	50.9347	0.30766	1.16678	10.1731		0.18729	7.69458	0.12804	0		33	4.352	30.098	0.179
		This study	63.9358	27.849	2958	30I-TVG02-1	30I-2-1-10	Mountain Jourdanne	34	4.493	15.892	7.033	50.421	0.293	1.178	10.088		0.171	7.865	0.189	0.029	97.652	2.12626	0.00443467	0.868617	0.00210892			re-homogenized MI	0.634785	0.058	0.235509	4.44544	16.7536	6.63535	50.4176	0.277572	1.10968	10.3257		0.162068	7.42733	0.17914	0.027318		35	3.673	30.747	0.177
		This study	63.9358	27.849	2958	30I-TVG02-1	30I-2-1-10-2	Mountain Jourdanne	36	4.418	15.772	7.2	50.377	0.333	1.272	9.651		0.218	7.751	0.208	0.062	97.262	2.11058	0.00722821	0.877636	0.00349921			re-homogenized MI	0.611907	0.074	0.234032	4.36287	16.8802	6.6803	50.376	0.310356	1.17787	9.98659		0.203126	7.20103	0.194014	0.057412		35	3.673	30.747	0.177
		This study	63.9358	27.849	2958	30I-TVG02-1	30I-2-1-11	Mountain Jourdanne	37	4.74	15.829	7.078	50.446	0.399	1.244	9.406		0.235	7.95	0.115	0.022	97.464							re-homogenized MI	0.594226	0.066	0.229028	4.68133	16.7855	6.62168	50.4715	0.375966	1.16368	9.68505		0.220084	7.44319	0.10807	0.020548		38	3.851	30.322	0.164
		This study	63.9358	27.849	2958	30I-TVG02-1	30I-2-1-12	Mountain Jourdanne	39	4.304	15.012	7.068	49.977	0.301	1.278	10.006		0.299	8.673	0.152	0.033	97.103	2.11826	0.00675356	0.873261	0.00386089			re-homogenized MI	0.666533	0.096	0.251969	4.24774	16.5448	6.40598	50.0203	0.275272	1.15954	10.3969		0.270296	7.8715	0.13808	0.029832		40	3.718	30.979	0.172
		This study	63.9358	27.849	2958	30I-TVG02-1	30I-2-1-13	Mountain Jourdanne	41	4.218	14.597	6.525	51.739	0.397	1.307	9.24		0.248	8.883	0.144	0.013	97.311	2.11965	0.00592113	0.872329	0.00289392			re-homogenized MI	0.633007	0.098	0.319965	4.27778	16.044	5.90544	51.8702	0.363288	1.18009	9.53606		0.224578	8.05039	0.13077	0.011726		42	4.828	29.362	0.203
		This study	63.9358	27.849	2958	30I-TVG02-1	30I-2-1-14	Mountain Jourdanne	43	4.481	15.965	6.772	50.979	0.334	1.245	10.082		0.231	7.719	0.15	0.032	97.99							re-homogenized MI	0.631506	0.046	0.264687	4.46035	16.6227	6.46872	50.998	0.320016	1.18962	10.2359		0.221754	7.37952	0.143744	0.031126		44	4.032	30.262	0.179
		This study	63.9358	27.849	2958	30I-TVG02-1	30I-2-1-15	Mountain Jourdanne	45	4.589	16.437	7.04	50.655	0.328	1.077	10.257		0.188	7.763	0.105	0.037	98.476	2.1254	0.00551139	0.871187	0.00254163			re-homogenized MI	0.624019	0.038	0.253841	4.56236	16.9882	6.77867	50.6596	0.317208	1.0368	10.3911		0.182984	7.4802	0.10101	0.035594		46	3.888	30.942	0.163
		This study	63.9358	27.849	2958	30I-TVG02-1	30I-2-1-16	Mountain Jourdanne	47	4.392	15.811	6.616	50.927	0.254	1.095	10.347		0.209	7.79	0.121	0.044	97.606	2.11399	0.00444988	0.871386	0.00209333			re-homogenized MI	0.654418	0.046	0.28009	4.38087	16.4728	6.32082	50.935	0.243742	1.04684	10.4932		0.201364	7.44767	0.115848	0.041976		48	4.15	30.199	0.199
		This study	63.9358	27.849	2958	30I-TVG02-1	30I-2-1-17	Mountain Jourdanne	49	4.539	15.709	5.892	50.523	0.381	1.179	9.786		0.243	9.233	0.183	0.017	97.685	2.13232	0.00473375	0.875527	0.00219339			re-homogenized MI	0.622955	0.016	0.226247	4.52902	15.9519	5.79998	50.5232	0.375688	1.16084	9.85355		0.239112	9.09028	0.1802	0.017064		50	3.915	30.888	0.141
		This study	63.9358	27.849	2958	30I-TVG02-1	30I-2-1-18	Mountain Jourdanne	51	4.648	16.037	6.513	51.585	0.316	0.864	9.667		0.047	7.901	0.176	0.039	97.793	2.11244	0.00389957	0.864648	0.00206767			re-homogenized MI	0.602794	0.029	0.247226	4.63472	16.4546	6.32885	51.5836	0.308489	0.839089	9.77639		0.046275	7.68086	0.171157	0.037869		52	4.19	30.436	0.163
		This study	63.9358	27.849	2958	30I-TVG02-1	30I-2-1-19	Mountain Jourdanne	53	4.754	16.1	6.793	51.377	0.397	0.803	9.454		0.154	7.572	0.157	0.036	97.597	2.12261	0.00285397	0.867086	0.0016456			re-homogenized MI	0.587205	0.041	0.226495	4.72198	16.7007	6.5224	51.3498	0.381502	0.771143	9.62845		0.147686	7.27401	0.150973	0.034524		54	3.973	30.751	0.193
		This study	63.9358	27.849	2958	30I-TVG02-1	30I-2-1-20	Mountain Jourdanne	55	4.432	15.928	7.153	50.211	0.302	1.271	10.017		0.209	7.361	0.157	0.086	97.127	2.11393	0.00359735	0.868335	0.00163546			re-homogenized MI	0.628893	0.064	0.233888	4.37818	16.894	6.70602	50.1997	0.283696	1.19151	10.292		0.195624	6.90974	0.147208	0.08056		56	3.591	31.021	0.169
		This study	63.9358	27.849	2958	30I-TVG02-1	30I-2-1-21	Mountain Jourdanne	57	4.714	16.039	5.914	51.172	0.377	1.095	9.436		0.205	8.632	0.165	0.015	97.764							re-homogenized MI	0.588316	0.001	0.229455	4.71343	16.0533	5.90825	51.1722	0.376683	1.09394	9.43992		0.204864	8.62369	0.164838	0.015024		58	4.139	30.302	0.163
		(a)	51.56	37.43	1900-2700	30I-SWIR-S004TVG02	PUB-1-MI1	Mountain Jourdanne	695	4.03	16.01	7	52.73	0.31	1.32	9.69	0.04	0.17	7.83	0.13	0.02	99.37								0.605247	0.05	0.247535	4.0065	16.718	6.657	52.694	0.2965	1.256	9.8815	0.0385	0.1625	7.4545	0.1235	0.019		PUB-1-MI1-plg	3.56	30.17	0.14
		(a)	51.56	37.43	1900-2700	30I-SWIR-S004TVG02	PUB-1-MI2	Mountain Jourdanne	696	3.94	15.91	6.9	52.72	0.29	1.34	9.81		0.16	7.89	0.17	0.11	99.28								0.616593	0.05	0.261562	3.9245	16.6135	6.563	52.7085	0.279	1.275	9.987	0.002	0.1535	7.51	0.1615	0.109		PUB-1-MI2-plg	3.63	29.98	0.16
		(a)	51.56	37.43	1900-2700	30I-SWIR-S004TVG02	PUB-1-MI3	Mountain Jourdanne	697	4.01	16.06	7.05	52.58	0.3	1.2	9.76	0.03	0.17	7.96	0.15	0.04	99.41								0.607721	0.05	0.258829	3.991	16.756	6.7055	52.5755	0.2885	1.142	9.9395	0.0305	0.163	7.5765	0.1425	0.0425		PUB-1-MI2-plg	3.63	29.98	0.16
		(a)	51.56	37.43	1900-2700	30I-SWIR-S004TVG02	PUB-1-MI4	Mountain Jourdanne	698	3.91	16	7.09	53.01	0.29	1.36	9.76	0.04	0.17	7.78	0.12		99.7								0.61	0.05	0.262201	3.896	16.699	6.7435	52.984	0.279	1.294	9.9395	0.04	0.163	7.4055	0.114	0.0045		PUB-1-MI2-plg	3.63	29.98	0.16
		(a)	51.56	37.43	1900-2700	30I-SWIR-S004TVG02	PUB-2-MI1	Mountain Jourdanne	666	3.76	15.21	7.58	51.58	0.23	1.48	10.22	0.01	0.21	7.76	0.18	0.07	98.34								0.671926	0.12	0.277854	3.7072	16.9404	6.6956	51.5656	0.2084	1.3096	10.6112	0.0088	0.1848	6.866	0.1596	0.0676		PUB-2-MI1-plg	3.32	29.63	0.21
		(a)	51.56	37.43	1900-2700	30I-SWIR-S004TVG02	PUB-2-MI2	Mountain Jourdanne	667	3.76	15.39	7.43	51.87	0.25	1.21	10.03		0.15	7.39	0.19	0.1	97.78								0.651722	0.11	0.282877	3.7237	16.9751	6.6336	51.837	0.228	1.0813	10.3897	0	0.1335	6.6156	0.1757	0.0912		PUB-2-MI2-plg	3.43	29.8	0.19
		(b)	63.936	27.849	2958	30I-TVG2-1	C1-1	Mountain Jourdanne	1-1MI1	4.03	16.01	7	52.73	0.31	1.32	9.69		0.17	7.83	0.13	0.02	99.21								0.605247	0.06	0.268672	4.01554	16.8571	6.5923	52.6854	0.29386	1.24896	9.9117	0	0.1613	7.37682	0.1222	0.02102		1-1PLG	3.789	30.128	0.205
		(b)	63.936	27.849	2958	30I-TVG2-1	C1-2	Mountain Jourdanne	1-2MI1	4.27	15.85	7.04	51.74	0.33	1.41	9.65		0.19	7.88	0.09	0.05	98.51								0.608833	0.06	0.25567	4.24114	16.7067	6.6299	51.7548	0.31266	1.33356	9.8741	0	0.1801	7.42382	0.0846	0.04922		1-1PLG	3.789	30.128	0.205
		(b)	63.936	27.849	2958	30I-TVG2-1	C1-2	Mountain Jourdanne	1-2MI2	3.94	15.91	6.9	52.72	0.29	1.34	9.81		0.16	7.89	0.17	0.11	99.23								0.616593	0.06	0.276079	3.93094	16.7631	6.4983	52.676	0.27506	1.26776	10.0245	0	0.1519	7.43322	0.1598	0.10562		1-1PLG	3.789	30.128	0.205
		(b)	63.936	27.849	2958	30I-TVG2-1	C1-3	Mountain Jourdanne	1-3MI1_1	3.65	15.26	7.8	52.06	0.36	1.16	9.72		0.19	7.89	0.15	0.07	98.3								0.636959	0.12	0.300813	3.65804	17.0542	6.88716	52.1106	0.321	1.03244	10.1759	0	0.16828	6.9738	0.132	0.0616		1-3PLG	3.717	30.212	0.193
		(b)	63.936	27.849	2958	30I-TVG2-1	C1-3	Mountain Jourdanne	1-3MI1_2	3.67	15.39	7.91	52.14	0.38	1.2	9.62		0.18	7.56	0.15	0.03	98.23								0.625081	0.12	0.298371	3.67564	17.1686	6.98396	52.181	0.3386	1.06764	10.0879	0	0.15948	6.6834	0.132	0.0264		1-3PLG	3.717	30.212	0.193
		(b)	63.936	27.849	2958	30I-TVG2-1	C1-3	Mountain Jourdanne	1-3MI2	3.64	15.61	7.83	52.6	0.35	1.27	9.85		0.21	7.28	0.13	0.01	98.79								0.631006	0.12	0.30763	3.64924	17.3622	6.91356	52.5858	0.3122	1.12924	10.2903	0	0.18588	6.437	0.1144	0.0088		1-3PLG	3.717	30.212	0.193
		(b)	63.936	27.849	2958	30I-TVG2-1	C1-4	Mountain Jourdanne	1-4MI1	4.01	16.06	7.05	52.58	0.3	1.2	9.76		0.17	7.96	0.15	0.04	99.27								0.607721	0.07	0.291622	4.003	17.0181	6.56735	52.5909	0.28236	1.12755	9.98743	0	0.1581	7.42191	0.1395	0.03979		1-4PLG	3.91	29.747	0.155
		(b)	63.936	27.849	2958	30I-TVG2-1	C1-4	Mountain Jourdanne	1-4MI2	3.91	16	7.09	53.01	0.29	1.36	9.76		0.17	7.78	0.12	0.04	99.49								0.61	0.07	0.295334	3.91	16.9623	6.60455	52.9908	0.27306	1.27635	9.98743	0	0.1581	7.25451	0.1116	0.03979		1-4PLG	3.91	29.747	0.155
		(b)	63.936	27.849	2958	30I-TVG2-1	C1-6	Mountain Jourdanne	1-6MI1	4.08	15.65	7.45	52.49	0.33	1.24	9.61		0.16	7.59	0.14	0.05	98.78								0.614058	0.07	0.238603	4.03863	16.6834	6.93907	52.4277	0.31054	1.15726	9.89651	0	0.14922	7.07305	0.1302	0.0465		1-6PLG	3.489	30.413	0.151
		(b)	63.936	27.849	2958	30I-TVG2-1	C1-7	Mountain Jourdanne	1-7MI1	3.89	15.23	7.45	52.3	0.25	1.15	10.35		0.12	7.71	0.07	0.05	98.58								0.67958	0.1	0.275256	3.8533	16.7145	6.7225	52.2597	0.2289	1.0418	10.6783	0	0.112	6.9673	0.0665	0.045		1-7PLG	3.523	30.075	0.175
		(b)	63.936	27.849	2958	30I-TVG2-1	C1-7	Mountain Jourdanne	1-7MI2	4.05	15.67	7.25	51.71	0.28	1.19	10.22		0.16	7.68	0.08	0.14	98.33								0.652202	0.09	0.26791	4.00257	16.9665	6.61325	51.7268	0.25831	1.08902	10.5272	0	0.1492	7.01427	0.07595	0.1274		1-7PLG	3.523	30.075	0.175
		(b)	63.936	27.849	2958	30I-TVG2-1	C1-7	Mountain Jourdanne	1-7MI3	4.04	15.56	7.25	51.99	0.28	1.46	10.02		0.17	8.02	0.14	0.08	99.08								0.643959	0.09	0.261035	3.99347	16.8664	6.61325	51.9816	0.25831	1.33472	10.3452	0	0.1583	7.32367	0.13055	0.0728		1-7PLG	3.523	30.075	0.175
		(b)	63.936	27.849	2958	30I-TVG2-1	C1-7	Mountain Jourdanne	1-7MI4	3.97	15.56	7.49	51.8	0.26	1.5	10.22		0.17	8	0.14	0.05	99.19								0.656812	0.09	0.270834	3.92977	16.8664	6.83165	51.8087	0.24011	1.37112	10.5272	0	0.1583	7.30547	0.13055	0.0455		1-7PLG	3.523	30.075	0.175
		(b)	63.936	27.849	2958	30I-TVG2-1	C1-7	Mountain Jourdanne	1-7MI5	4.03	15.67	7.62	52.16	0.26	1.45	10.04		0.18	7.84	0.09	0.02	99.39								0.640715	0.09	0.262865	3.98437	16.9665	6.94995	52.1363	0.24011	1.32562	10.3634	0	0.1674	7.15987	0.08505	0.0182		1-7PLG	3.523	30.075	0.175
		(b)	63.936	27.849	2958	30I-TVG2-1	C1-8	Mountain Jourdanne	1-8MI1	4.33	15.33	7.48	53.29	0.41	1.05	9.22		0.1	7.02	0.15		98.41								0.601435	0.09	0.254815	4.2958	16.6272	6.82327	53.2671	0.3776	0.96072	9.55417	0	0.09235	6.41637	0.1365	0		1-8PLG	3.95	29.743	0.183
		(b)	63.936	27.849	2958	30I-TVG2-2	C2-1	Mountain Jourdanne	2-1MI1	4.11	14.84	7.97	51.86	0.33	1.39	9.9		0.15	7.39	0.15	0.02	98.1								0.667116	0.15	0.308728	4.0878	17.0604	6.79895	52.0104	0.2889	1.1815	10.3332	0	0.1275	6.3319	0.12765	0.017		2-1PLG	3.962	29.643	0.163
		(b)	63.936	27.849	2958	30I-TVG2-2	C2-2	Mountain Jourdanne	2-1MI2	3.76	15.21	7.58	51.58	0.23	1.48	10.22		0.21	7.76	0.18	0.07	98.28								0.671926	0.12	0.339229	3.78424	16.942	6.68996	51.734	0.20912	1.3024	10.5282	0	0.1848	6.86912	0.15852	0.0616		2-1PLG	3.962	29.643	0.163
		(b)	63.936	27.849	2958	30I-TVG2-2	C2-2	Mountain Jourdanne	2-2MI1	3.76	15.39	7.43	51.87	0.25	1.21	10.03		0.15	7.39	0.19	0.1	97.76								0.651722	0.11	0.331869	3.78222	16.9578	6.63063	51.9792	0.22866	1.0769	10.3334	0	0.1335	6.61406	0.16921	0.089		2-1PLG	3.962	29.643	0.163
		(b)	63.936	27.849	2958	30I-TVG2-2	C2-4	Mountain Jourdanne	2-4MI	4	15.73	7.06	52.54	0.32	1.07	9.78		0.15	7.31	0.09	0.03	98.06								0.621742	0.08	0.285486	3.98888	16.8709	6.51152	52.513	0.29784	0.9844	10.0501	0	0.1384	6.75048	0.08472	0.0276		2-4PLG	3.861	29.991	0.204
		(b)	63.936	27.849	2958	30I-TVG2-2	C2-6	Mountain Jourdanne	2-6MI1	4	16.11	7.37	52.49	0.31	1.09	10.22		0.15	6.94	0.14	0.1	98.92								0.634389	0.08	0.303405	3.98888	17.2205	6.79672	52.467	0.28864	1.0028	10.4549	0	0.1384	6.41008	0.13072	0.092		2-4PLG	3.861	29.991	0.204
		(b)	63.936	27.849	2958	30I-TVG2-2	C2-6	Mountain Jourdanne	2-6MI2	4.06	15.84	7.52	52.7	0.32	1.26	10.17		0.1	6.97	0.02	0.03	99								0.642045	0.08	0.292572	4.04408	16.9721	6.93472	52.6602	0.29784	1.1592	10.4089	0	0.0924	6.43768	0.02032	0.0276		2-4PLG	3.861	29.991	0.204
		(b)	63.936	27.849	2958	30I-TVG2-2	C2-7	Mountain Jourdanne	2-7MI1	3.87	15.28	7.42	52.47	0.27	1.35	10.13		0.16	7.46	0.14	0.05	98.6								0.662958	0.09	0.291821	3.8619	16.6068	6.77029	52.4552	0.24894	1.23552	10.4144	0	0.1474	6.81092	0.1274	0.0455		2-7PLG	3.78	30.022	0.201
		(b)	63.936	27.849	2958	30I-TVG2-2	C2-7	Mountain Jourdanne	2-7MI2	4.11	15.64	7.25	51.85	0.25	1.35	10.28		0.18	7.22	0.11	0.14	98.38								0.657289	0.09	0.288444	4.0803	16.9344	6.61559	51.891	0.23074	1.23552	10.5509	0	0.1656	6.59252	0.1001	0.1274		2-7PLG	3.78	30.022	0.201
		(b)	63.936	27.849	2958	30I-TVG2-2	C2-8	Mountain Jourdanne	2-8MI1	4.01	15.75	7.77	51.73	0.31	1.32	9.89		0.13	7.05	0.18	0.04	98.17								0.627937	0.09	0.248264	3.94772	17.0945	7.08672	51.706	0.28498	1.20381	10.2395	0	0.11893	6.44484	0.1638	0.0364		2-8PLG	3.318	30.689	0.178
		(b)	63.936	27.849	2958	30I-TVG2-2	C2-8	Mountain Jourdanne	2-8MI2	3.99	15.65	7.49	52.06	0.29	1.21	10.2		0.18	7.43	0.09	0.05	98.62								0.651757	0.09	0.253449	3.92952	17.0035	6.83192	52.0063	0.26678	1.10371	10.5216	0	0.16443	6.79064	0.0819	0.0455		2-8PLG	3.318	30.689	0.178
		(b)	63.936	27.849	2958	30I-TVG2-2	C2-8	Mountain Jourdanne	2-8MI3	4.14	15.84	7.53	52.64	0.32	1.08	10.01		0.14	7.23	0.12	0.02	99.08								0.631944	0.09	0.24092	4.06602	17.1764	6.86832	52.5341	0.29408	0.98541	10.3487	0	0.12803	6.60864	0.1092	0.0182		2-8PLG	3.318	30.689	0.178
		(b)	63.936	27.849	2958	30I-TVG2-2	C2-8	Mountain Jourdanne	2-8MI4	3.69	15.62	7.44	51.66	0.26	1.36	10.49		0.22	7.36	0.16	0.09	98.35								0.671575	0.09	0.28072	3.65652	16.9762	6.78642	51.6423	0.23948	1.24021	10.7855	0	0.20083	6.72694	0.1456	0.0819		2-8PLG	3.318	30.689	0.178
		(c)	63.9358	27.849	2958	30I-TVG02-1	IndianMI-01	Mountain Jourdanne	IndianMI-01*	4.22538	15.1249	7.01289	52.0981		1.24938			0.141277	8.40783	0.165243			2.11643	0.00944626	0.873587	0.00512922			re-homogenized MI		0.09		4.2176	16.4908	6.3964	52.0321		1.14008			0.134772	7.6802	0.150641	0.00351		58	4.139	30.302	0.163
		(c)	63.9358	27.849	2958	30I-TVG02-1	IndianMI-02	Mountain Jourdanne	IndianMI-02*	4.22172	15.2674	7.0911	52.871		1.11923			0.119905	8.37826	0.164121			2.12465	0.00822403	0.879241	0.00430921			re-homogenized MI		0.092		4.21411	16.6506	6.45372	52.7324		1.01948			0.115222	7.63717	0.149297	0.003588		58	4.139	30.302	0.163
		(c)	63.9358	27.849	2958	30I-TVG02-1	IndianMI-03a	Mountain Jourdanne	IndianMI-03a*	4.5175	15.6616	7.02173	52.032		1.25105			0.151723	8.19966	0.167935			2.11542	0.00826355	0.868189	0.00391807			re-homogenized MI		0.076		4.48874	16.7743	6.50046	51.9813		1.15863			0.145436	7.60104	0.1554	0.002964		58	4.139	30.302	0.163
		(c)	63.9358	27.849	2958	30I-TVG02-1	IndianMI-03b	Mountain Jourdanne	IndianMI-03b*	4.60812	15.6764	6.69703	50.9735		1.83878			0.256744	8.79229	0.173737			2.11924	0.00746049	0.870738	0.00319533			re-homogenized MI		0.056		4.58185	16.4954	6.33113	50.9954		1.73777			0.24623	8.31801	0.164175	0.002184		58	4.139	30.302	0.163
		(c)	63.9358	27.849	2958	30I-TVG02-1	IndianMI-04	Mountain Jourdanne	IndianMI-04*	4.38034	15.4864	7.25677	51.824		1.22549			0.147231	8.46963	0.167292			2.12375	0.00690891	0.874881	0.00309585			re-homogenized MI		0.092		4.35813	16.8494	6.60415	51.7818		1.11597			0.140034	7.72014	0.152177	0.003588		58	4.139	30.302	0.163
		(c)	63.9358	27.849	2958	30I-TVG02-1	IndianMI-05	Mountain Jourdanne	IndianMI-05*	4.50084	15.8536	7.03089	50.4336		1.66601			0.206238	9.18143	0.177941			2.11325	0.00779167	0.872798	0.00360703			re-homogenized MI		0.066		4.47696	16.8072	6.57761	50.4951		1.55836			0.19718	8.59678	0.166395	0.002574		58	4.139	30.302	0.163
		(c)	63.9358	27.849	2958	30I-TVG02-1	IndianMI-06	Mountain Jourdanne	IndianMI-06*	4.49161	15.6011	7.10648	51.9932		1.18947			0.14923	8.44834	0.168729			2.11395	0.00758179	0.870534	0.00323156			re-homogenized MI		0.082		4.4627	16.8066	6.53711	51.9417		1.0948			0.142652	7.78206	0.155139	0.003198		58	4.139	30.302	0.163
		(c)	63.9358	27.849	2958	30I-TVG02-1	IndianMI-07	Mountain Jourdanne	IndianMI-07*	4.32016	15.1704	7.32171	51.9701		1.31808			0.168673	8.82098	0.175846			2.1206	0.00601117	0.866566	0.0024895			re-homogenized MI		0.102		4.30168	16.7138	6.59152	51.9084		1.1872			0.158506	7.95419	0.158216	0.003978		58	4.139	30.302	0.163
		(c)	63.9358	27.849	2958	30I-TVG02-1	IndianMI-8a	Mountain Jourdanne	IndianMI-8a*	4.2862	15.4515	7.43865	51.2809		1.35423			0.173136	8.83917	0.174415			2.11532	0.00583679	0.86725	0.00310539			re-homogenized MI		0.098		4.27177	16.9068	6.72564	51.2892		1.22494			0.16293	8.00459	0.157616	0.003822		58	4.139	30.302	0.163
		(c)	63.9358	27.849	2958	30I-TVG02-1	IndianMI-8b	Mountain Jourdanne	IndianMI-8b*	4.34785	15.3949	7.69449	51.5421		1.36712			0.186964	8.38711	0.171016			2.11373	0.00638247	0.871349	0.00296849			re-homogenized MI		0.116		4.32362	17.1242	6.82083	51.5215		1.21259			0.173281	7.45168	0.151526	0.004524		58	4.139	30.302	0.163
		(c)	63.9358	27.849	2958	30I-TVG02-1	IndianMI-9a	Mountain Jourdanne	IndianMI-9a*	4.41905	15.4568	7.33578	51.392		1.39452			0.180477	8.71449	0.16853			2.11193	0.0067699	0.857398	0.00310993			re-homogenized MI		0.09		4.39385	16.7929	6.69023	51.3895		1.27216			0.170444	7.95925	0.153633	0.00351		58	4.139	30.302	0.163
		(c)	63.9358	27.849	2958	30I-TVG02-1	IndianMI-9b	Mountain Jourdanne	IndianMI-9b*	4.3617	15.5625	7.24878	51.3207		1.36278			0.178319	8.61811	0.172275			2.10791	0.00850962	0.862402	0.00384538			re-homogenized MI		0.09		4.34165	16.889	6.61106	51.3247		1.24328			0.16848	7.87155	0.15704	0.00351		58	4.139	30.302	0.163
		(c)	63.9358	27.849	2958	30I-TVG02-1	IndianMI-10	Mountain Jourdanne	IndianMI-10*	4.70585	15.9006	7.24229	51.9302		1.19803			0.151328	7.906	0.164923			2.13152	0.00705023	0.865331	0.00306557			re-homogenized MI		0.078		4.66163	17.0239	6.69011	51.8861		1.10732			0.144906	7.31453	0.152293	0.003042		58	4.139	30.302	0.163
		(c)	63.9358	27.849	2958	30I-TVG02-1	IndianMI-11	Mountain Jourdanne	IndianMI-11*	4.43269	15.6608	7.46999	51.2852		1.33557			0.167539	8.19911	0.16688			2.12613	0.00886077	0.866502	0.00411441			re-homogenized MI		0.092		4.40567	17.0078	6.79775	51.2926		1.21592			0.158474	7.47451	0.151803	0.003588		58	4.139	30.302	0.163
		(c)	63.9358	27.849	2958	30I-TVG02-1	IndianMI-12	Mountain Jourdanne	IndianMI-12*	4.61379	15.1547	7.28047	52.5343		1.36619			0.194285	8.12104	0.162161			2.07611	0.00744327	0.849384	0.00309916			re-homogenized MI		0.108		4.56251	16.7906	6.51178	52.408		1.22242			0.180754	7.27885	0.144971	0.004212		58	4.139	30.302	0.163
		(a) Li W (2017) Petrogeochemical characteristics of basalts from Southwest Indian Ridge: Implications for magmatic processes at ultra-slow spreading ridge. Institute of Geophysics & Geomatics, Doctor thesis.
		(b) Li W, Tao C, Zhang W, Liu J, Liang J, Liao S, Yang W (2019) Melt Inclusions in Plagioclase Macrocrysts at Mountain Jourdanne, Southwest Indian Ridge (~64° E): Implications for an Enriched Mantle Source and Shallow Magmatic Processes. Minerals 9: 493
		(c) Zhang L, Qian SP, Li N, Hong LB, Zhang YQ, Ren ZY (2021b) Simultaneous In Situ Determination of Pb Isotope Ratios and Trace Element Concentrations in Melt Inclusions by LASS-ICP-MS. Geochem Geophys Geosyst 22(1):e2020GC009451
			Post-entrapment crystallization (PEC) of plagioclase along the walls of the melt inclusion (MI) will drive the inclusion composition away from the composition of plagioclase, enriching the inclusion in elements incompatible in plagioclase, such as Mg and Fe (Bryan, 1983; Grove et al., 1992). Based on MI homogenization experiments and the phase equilibria of MORB (Bryan, 1983; Grove et al., 1992; …
			Script "*"	The data supplement (major elements) to the MI in Zhang L et al. (2020 GC)
			An_h, Ab_h and Or_h	Anorthite, albite and orthoclase content of the hosting plagioclase
			FeOt_i	Total FeO of the initial trapped melt
			KD (An-Ab)Pl-melt	Equilibrium constant between MI and its host Pl. The equilibrium constant for An-Ab exchange, might be more useful as a test for equilibrium, because although it clearly varies with T, P and H2O, the values are normally distributed, and when divided over two temperature intervals yield KD(An-Ab)pl-liq = X(Ab of Pl)*X(AlO1.5 of melt, mole)*X(CaO of melt, mole)/X(An of Pl)*X(NaO1.5 of melt, mole) *…
			The data of Plag/melt Kd are from Laubier et al. (2014) and White et al. (2013)
				Laubier M, Grove T, Langmuir CH, (2014) Trace element minerla/melt partitioning for basaltic and basaltic andesitic melts: An experimental and laser ICP-MS study with application to the oxidation state of mantle source regions. Earth Planet. Sci. Lett. 392:265-278
				White, WM, (2013) Geochemistry. Wiley-Blackwell. Chichester. 660 pages
[truncated: 75 more columns]
