# Supplementary material for: Magmatic processes within the plumbing system of the ultraslow-spreading southwest Indian ridge: constraints from olivine, plagioclase and melt inclusions
Source: Springer Nature journal article supplement (doi:10.1007/s00410-024-02098-0), 2024-02-22
Supplement: MOESM7 [file 410_2024_2098_MOESM7_ESM.xls]

## Sheet: Table S6
		Supplemental Table S6. The results of modelling crystallisation through the Petrolog 3 software
		Starting composition	Zone	Sample	SiO2	TiO2	Al2O3	Fe2O3t	FeO	MnO	MgO	CaO	Na2O	K2O	P2O5
		1	Segment 27	SW-III-14-2	47.95	0.87	15.62	11.16		0.14	10.4	10.89	2.46	0.16	0
		2	Mountain Jourdanne	49I-TVG01	51.17	1.14	17.72	7.76		0.13	7.34	10.97	3.86	0.2	0.14
		Using sample SW-III-14-2 as starting composition																	Using sample 49I-TVG01 as starting composition
		Results	SiO2_magma	TiO2_magma	Al2O3_magma	Fe2O3_magma	FeO_magma	MnO_magma	MgO_magma	CaO_magma	Na2O_magma	K2O_magma	P2O5_magma	Cr2O3_magma	H2O_magma				Results	SiO2_magma	TiO2_magma	Al2O3_magma	Fe2O3_magma	FeO_magma	MnO_magma	MgO_magma	CaO_magma	Na2O_magma	K2O_magma	P2O5_magma	Cr2O3_magma	H2O_magma
		1	48.6125	0.8821	15.8371	1.077	9.2117	0.1419	10.5399	11.0413	2.4942	0.1622	0	0	0				1	50.826	1.1324	17.6023	0.6106	6.3859	0.1291	7.2866	10.8971	3.8344	0.1987	0.1391	0	0.9361
		2	48.6966	0.891	15.9963	1.0682	9.1943	0.1413	10.1784	11.1488	2.5193	0.1639	0	0	0				2	50.826	1.1325	17.6009	0.6108	6.3863	0.1291	7.2873	10.8968	3.8344	0.1987	0.1391	0	0.9362
		3	48.7839	0.9001	16.1603	1.0599	9.1719	0.1406	9.8092	11.2594	2.5451	0.1655	0	0	0				3	50.8516	1.1438	17.542	0.6168	6.4148	0.1299	7.245	10.9015	3.8459	0.2007	0.1405	0	0.9455
		4	48.873	0.9093	16.326	1.0522	9.1446	0.1399	9.4396	11.3712	2.5712	0.1672	0	0	0				4	50.8791	1.1555	17.4849	0.6234	6.4423	0.1308	7.1954	10.9084	3.858	0.2027	0.1419	0	0.9552
		5	48.9656	0.9188	16.4967	1.045	9.1112	0.1389	9.0626	11.4864	2.5981	0.169	0	0	0				5	50.9054	1.1674	17.4246	0.6298	6.4711	0.1316	7.1502	10.9145	3.8697	0.2048	0.1434	0	0.965
		6	49.0162	0.9241	16.5877	1.0417	9.0916	0.1384	8.8604	11.5486	2.6127	0.1699	0	0	0				6	50.9326	1.1796	17.3643	0.6366	6.4997	0.1325	7.1015	10.9219	3.8817	0.2069	0.1449	0	0.9751
		7	49.0284	0.9284	16.5555	1.0467	9.1138	0.1388	8.8424	11.5507	2.6159	0.1707	0	0	0				7	50.9596	1.1919	17.3039	0.6434	6.5281	0.1333	7.0526	10.9298	3.8936	0.2091	0.1464	0	0.9853
		8	49.0553	0.9383	16.4815	1.0578	9.1645	0.1395	8.8033	11.5554	2.6229	0.1726	0	0	0				8	50.9875	1.2046	17.2435	0.6504	6.5565	0.1342	7.0003	10.939	3.9058	0.2113	0.1479	0	0.9958
		9	49.083	0.9484	16.4087	1.0694	9.2145	0.1403	8.7604	11.5617	2.6301	0.1744	0	0	0				9	51.0141	1.2176	17.1784	0.6577	6.5864	0.1351	6.9529	10.9473	3.9175	0.2136	0.1495	0	1.0065
		10	49.1106	0.9587	16.3339	1.0812	9.2656	0.1411	8.7183	11.5682	2.6371	0.1763	0	0	0				10	51.0427	1.2308	17.1179	0.6651	6.6143	0.1359	6.8969	10.9585	3.9298	0.2159	0.1512	0	1.0174
		11	49.1389	0.9693	16.2587	1.0935	9.3169	0.1419	8.6732	11.576	2.6441	0.1783	0	0	0				11	51.0699	1.2444	17.0513	0.6729	6.6444	0.1368	6.8465	10.9685	3.9416	0.2183	0.1528	0	1.0287
		12	49.1671	0.98	16.1831	1.1057	9.3686	0.1427	8.628	11.5843	2.651	0.1802	0	0	0				12	51.098	1.2582	16.9875	0.6809	6.6731	0.1377	6.7912	10.9804	3.9537	0.2207	0.1545	0	1.0401
		13	49.1951	0.9911	16.1039	1.1187	9.4218	0.1435	8.5844	11.5925	2.6576	0.1823	0	0	0				13	51.1259	1.2724	16.9206	0.689	6.7028	0.1387	6.7371	10.9926	3.9656	0.2232	0.1563	0	1.0518
		14	49.2238	1.0024	16.0257	1.1317	9.4747	0.1443	8.537	11.6025	2.6644	0.1843	0	0	0				14	51.1546	1.2868	16.8551	0.6974	6.7315	0.1396	6.6787	11.0064	3.9778	0.2258	0.158	0	1.0637
		15	49.2524	1.0138	15.9455	1.1454	9.5281	0.1451	8.4903	11.6127	2.6709	0.1865	0	0	0				15	51.1831	1.3016	16.788	0.7061	6.7606	0.1405	6.6208	11.0207	3.9898	0.2283	0.1598	0	1.0759
		16	49.2807	1.0257	15.8616	1.1591	9.5838	0.146	8.4451	11.623	2.6771	0.1886	0	0	0				16	51.2113	1.3168	16.7178	0.7149	6.7907	0.1415	6.5639	11.0354	4.0017	0.231	0.1617	0	1.0885
		17	49.3097	1.0377	15.7788	1.1733	9.6387	0.1468	8.3962	11.635	2.6834	0.1908	0	0	0				17	51.2404	1.3323	16.649	0.7241	6.8197	0.1424	6.5028	11.0519	4.0138	0.2337	0.1636	0	1.1013
		18	49.3396	1.0501	15.697	1.1882	9.6929	0.1476	8.3436	11.6489	2.6897	0.1931	0	0	0				18	51.2704	1.3481	16.5815	0.7335	6.8477	0.1434	6.4375	11.0702	4.0261	0.2365	0.1656	0	1.1144
		19	49.3692	1.0627	15.6114	1.2033	9.7489	0.1485	8.2925	11.6628	2.6957	0.1954	0	0	0				19	51.2988	1.3643	16.5079	0.7433	6.8778	0.1444	6.3777	11.0877	4.0379	0.2394	0.1676	0	1.1278
		20	49.3985	1.0757	15.5237	1.2188	9.806	0.1493	8.242	11.6773	2.7015	0.1978	0	0	0				20	51.3293	1.381	16.4386	0.7534	6.9054	0.1454	6.3093	11.1083	4.0503	0.2423	0.1696	0	1.1415
		21	49.4286	1.089	15.4353	1.2348	9.8632	0.1502	8.1886	11.6934	2.7072	0.2003	0	0	0				21	51.3594	1.398	16.3661	0.7638	6.9338	0.1464	6.2418	11.1295	4.0625	0.2453	0.1717	0	1.1557
		22	49.4594	1.1026	15.3479	1.2513	9.9198	0.1511	8.1315	11.7114	2.7129	0.2028	0	0	0				22	51.3893	1.4155	16.292	0.7748	6.9622	0.1474	6.1746	11.1514	4.0744	0.2483	0.1738	0	1.1701
		23	49.4899	1.1166	15.2565	1.2686	9.9778	0.1519	8.0758	11.7297	2.7183	0.2053	0	0	0				23	51.4199	1.4334	16.2177	0.786	6.9901	0.1484	6.1039	11.1752	4.0866	0.2515	0.176	0	1.1849
		24	49.5201	1.1308	15.163	1.286	10.037	0.1528	8.0207	11.7486	2.7234	0.208	0	0	0				24	51.4502	1.4518	16.1417	0.7975	7.018	0.1494	6.0334	11.1999	4.0985	0.2547	0.1783	0	1.2001
		25	49.5511	1.1455	15.0687	1.3042	10.0962	0.1537	7.9627	11.7694	2.7284	0.2107	0	0	0				25	51.4827	1.4706	16.0685	0.8095	7.0437	0.1504	5.955	11.2277	4.1111	0.258	0.1806	0	1.2157
		26	49.5827	1.1606	14.9735	1.3231	10.1554	0.1546	7.9018	11.792	2.7333	0.2134	0	0	0				26	51.5146	1.49	15.9921	0.822	7.0698	0.1514	5.8774	11.2564	4.1233	0.2614	0.183	0	1.2317
		27	49.6151	1.176	14.8792	1.3424	10.2138	0.1554	7.8373	11.8168	2.7381	0.2163	0	0	0				27	51.5463	1.5098	15.9139	0.835	7.0957	0.1525	5.8	11.286	4.1354	0.2649	0.1854	0	1.2481
		28	49.6472	1.1919	14.7809	1.3626	10.2738	0.1563	7.7741	11.8422	2.7426	0.2192	0	0	0				28	51.5788	1.5302	15.8356	0.8484	7.1207	0.1535	5.7191	11.3178	4.1476	0.2685	0.1879	0	1.2649
		29	49.6788	1.2082	14.6785	1.3835	10.3354	0.1573	7.7122	11.8682	2.7465	0.2222	0	0	0				29	51.6134	1.5511	15.7599	0.8624	7.1428	0.1545	5.6303	11.353	4.1604	0.2721	0.1905	0	1.2822
		30	49.7122	1.225	14.5784	1.4053	10.3951	0.1581	7.6432	11.8977	2.7507	0.2253	0	0	0				30	51.6476	1.5727	15.6811	0.8772	7.1651	0.1555	5.5422	11.3893	4.1728	0.2759	0.1931	0	1.3
		31	49.7452	1.2423	14.4741	1.4276	10.4565	0.159	7.5755	11.928	2.7543	0.2285	0	0	0				31	51.6828	1.5948	15.602	0.8924	7.186	0.1566	5.4505	11.428	4.1855	0.2798	0.1959	0	1.3184
		32	49.7789	1.2601	14.3688	1.451	10.5177	0.1599	7.5049	11.9605	2.7578	0.2317	0	0	0				32	51.7188	1.6177	15.5226	0.9082	7.2053	0.1576	5.3552	11.4691	4.1982	0.2838	0.1987	0	1.3372
		33	49.8133	1.2783	14.2624	1.4752	10.5785	0.1608	7.4314	11.9954	2.7611	0.2351	0	0	0				33	51.7571	1.6411	15.4459	0.9248	7.2212	0.1585	5.2522	11.5139	4.2116	0.2879	0.2015	0	1.3566
		34	49.8484	1.2971	14.1549	1.5005	10.6388	0.1617	7.3549	12.0326	2.7641	0.2386	0	0	0				34	51.7965	1.6653	15.3689	0.9421	7.235	0.1595	5.1456	11.5613	4.225	0.2922	0.2045	0	1.3766
		35	49.8842	1.3165	14.0462	1.5265	10.6989	0.1626	7.2756	12.0723	2.767	0.2421	0	0	0				35	51.8369	1.6901	15.2915	0.9602	7.2465	0.1604	5.0355	11.6113	4.2386	0.2965	0.2076	0	1.3971
		36	49.9195	1.3364	13.9333	1.554	10.76	0.1634	7.1975	12.1132	2.7692	0.2458	0	0	0				36	51.8798	1.7156	15.2168	0.9792	7.2539	0.1613	4.9177	11.6653	4.2528	0.301	0.2107	0	1.4182
		37	49.9566	1.357	13.8205	1.5824	10.8197	0.1643	7.1131	12.158	2.7714	0.2496	0	0	0				37	51.9251	1.7421	15.1433	0.9991	7.2572	0.1622	4.7928	11.7233	4.2676	0.3056	0.2139	0	1.4401
		38	49.9932	1.3782	13.7033	1.6122	10.8804	0.1652	7.0299	12.2042	2.7729	0.2535	0	0	0				38	51.9733	1.7693	15.0724	1.02	7.2555	0.1629	4.6603	11.7855	4.283	0.3104	0.2173	0	1.4626
		39	50.0316	1.4001	13.5862	1.6435	10.9392	0.166	6.9404	12.2545	2.7744	0.2575	0	0	0				39	52.0256	1.7975	15.0057	1.0419	7.2471	0.1636	4.5167	11.8531	4.2995	0.3153	0.2207	0	1.4859
		40	50.0708	1.4227	13.4676	1.6761	10.9969	0.1668	6.848	12.3078	2.7756	0.2616	0	0	0				40	52.0841	1.8265	14.9474	1.0648	7.2286	0.1641	4.3578	11.9273	4.3177	0.3204	0.2243	0	1.5098
		41	50.1107	1.446	13.3476	1.7101	11.0533	0.1676	6.7527	12.3641	2.7764	0.2659	0	0	0				41	52.1505	1.8563	14.9006	1.0886	7.1971	0.1644	4.18	12.0092	4.3382	0.3257	0.228	0	1.5345
		42	50.1524	1.4702	13.2257	1.7461	11.1082	0.1683	6.652	12.4248	2.777	0.2704	0	0	0				42	52.2283	1.8874	14.8682	1.1134	7.1483	0.1644	3.9769	12.1013	4.3618	0.3311	0.2318	0	1.5602
		43	50.1949	1.4951	13.1023	1.7837	11.1615	0.1691	6.5484	12.4887	2.7771	0.275	0	0	0				43	52.3278	1.9194	14.8707	1.1385	7.0663	0.1638	3.7258	12.21	4.3921	0.3367	0.2357	0	1.5866
		44	50.2383	1.5207	12.9772	1.823	11.213	0.1697	6.4421	12.556	2.7769	0.2797	0	0	0				44	52.4798	1.9523	14.9603	1.1613	6.9061	0.1616	3.3626	12.355	4.4383	0.3425	0.2398	0	1.6138
		45	50.2836	1.5474	12.8501	1.8646	11.2621	0.1704	6.3304	12.628	2.7763	0.2846	0	0	0				45	52.7381	1.9865	15.2229	1.1736	6.5813	0.156	2.7928	12.5699	4.5162	0.3485	0.244	0	1.6421
		46	50.331	1.575	12.7225	1.9086	11.3076	0.171	6.2127	12.7049	2.7755	0.2897	0	0	0				46	53.015	2.022	15.4948	1.1737	6.207	0.1492	2.2439	12.7924	4.5968	0.3547	0.2483	0	1.6715
		47	50.3819	1.6038	12.5957	1.9553	11.3477	0.1714	6.0859	12.7882	2.7747	0.295	0	0	0				47	53.3151	2.0589	15.7778	1.1514	5.7757	0.1407	1.7238	13.0241	4.6808	0.3612	0.2529	0	1.702
		48	50.4339	1.6334	12.467	2.0043	11.3846	0.1719	5.9565	12.8754	2.7735	0.3004	0	0	0				48	53.6388	2.097	16.0692	1.0925	5.2873	0.1304	1.2518	13.2627	4.7672	0.3679	0.2575	0	1.7334
		49	50.4896	1.6642	12.339	2.0564	11.4151	0.1721	5.8182	12.9693	2.7722	0.3061	0	0	0				49	53.9938	2.1366	16.3725	0.9796	4.7308	0.1176	0.8388	13.5112	4.8572	0.3748	0.2624	0	1.7661
		50	50.5478	1.6962	12.2102	2.1117	11.4399	0.1723	5.6743	13.0689	2.7707	0.3119	0	0	0				50	54.3828	2.1775	16.6866	0.8012	4.098	0.102	0.5043	13.7684	4.9504	0.382	0.2674	0	1.8
		51	50.6114	1.7296	12.0831	2.1708	11.4555	0.1724	5.5186	13.1769	2.7694	0.3181	0	0	0				51	54.8138	2.2204	17.0152	0.5633	3.357	0.0829	0.2579	14.0377	5.0479	0.3895	0.2727	0	1.8355
		52	50.6795	1.7642	11.9582	2.2336	11.4614	0.1722	5.354	13.2922	2.7683	0.3244	0	0	0				52	55.2832	2.2648	17.3555	0.3098	2.475	0.0604	0.1033	14.3166	5.1488	0.3973	0.2781	0	1.8722
		53	50.7536	1.8002	11.8366	2.3006	11.4549	0.1719	5.1775	13.4163	2.7677	0.3311	0	0	0				53	55.791	2.311	17.7096	0.1033	1.4052	0.0349	0.0255	14.6069	5.2539	0.4054	0.2838	0	1.9104
		54	50.8374	1.8376	11.7241	2.3722	11.4295	0.1711	4.9827	13.5518	2.7684	0.338	0	0	0
		55	50.9299	1.8766	11.6179	2.4488	11.3858	0.1701	4.7736	13.6978	2.7702	0.3451	0	0	0
		56	51.0379	1.9174	11.528	2.5309	11.312	0.1684	4.5377	13.8594	2.7747	0.3526	0	0	0
		57	51.1659	1.9601	11.4603	2.6187	11.1987	0.166	4.27	14.0393	2.7831	0.3605	0	0	0
		58	51.3273	2.0047	11.4356	2.7116	11.0209	0.1624	3.9504	14.2457	2.7991	0.3687	0	0	0
		59	51.5595	2.0513	11.5132	2.8057	10.7097	0.156	3.5227	14.5018	2.8329	0.3773	0	0	0
		60	51.9208	2.1001	11.7811	2.8845	10.1542	0.1443	2.9197	14.8418	2.8993	0.3862	0	0	0
		61	52.3172	2.1513	12.0685	2.9347	9.5238	0.1304	2.3379	15.2013	2.97	0.3956	0	0	0
		62	52.7493	2.2051	12.3703	2.9311	8.8297	0.1141	1.7956	15.5789	3.0443	0.4055	0	0	0
		63	53.2218	2.2616	12.6873	2.8392	8.0823	0.0948	1.3071	15.9755	3.1223	0.4159	0	0	0
		64	53.7418	2.3212	13.0215	2.6199	7.2904	0.072	0.8866	16.3937	3.2045	0.4269	0	0	0
		65	54.3144	2.384	13.3738	2.2464	6.4564	0.0452	0.5487	16.8347	3.2912	0.4384	0	0	0
		66	54.9433	2.4503	13.7454	1.7309	5.5556	0.014	0.3011	17.2998	3.3827	0.4506	0	0	0
		Note: Detailed procedure of correcting PEP in plagioclase-hosted melt inclusion Post entrapment processes (PEP) of plagioclase (Pl) along the walls of the melt inclusions will affect the inclusion composition to departure equilibrium state from the composition of Pl, by enriching the inclusion in elements incompatible in Pl, such as Mg and Fe (Nielsen et al. 2020). Similar to the MORBs, the Pl-ho…
		Nielsen RL, Ustunisik G, Lange AE, Tepley III FJ, Kent AJR (2020) Trace Element and Isotopic Characteristics of Plagioclase Megacrysts in Plagioclase Ultraphyric Basalts (PUB). Geochem Geophys Geosyst 21(2):e2019GC008638
		Sinton CW, Christie DM, Coombs VL, Nielsen RL, Fisk MR (1993) Near-primary melt inclusions in anorthite phenocrysts from the Galapagos Platfrom. Earth Planet Sci Lett 119(4):527-537
		Danyushevsky LV, Sokolov S, Falloon TJ (2002) Melt Inclusions in Olivine Phenocrysts: Using Diffusive Re-equilibration to Determine the Cooling History of a Crystal, with Implications for the Origin of Olivine-phyric Volcanic Rocks. J Petrol 43(9):1651-1671
		Hellevang B, Pedersen RB (2008) Magma Ascent and Crustal Accretion at Ultraslow-Spreading Ridges: Constraints from Plagioclase Ultraphyric Basalts from the Arctic Mid-Ocean Ridge. J Petrol 49(2):267-294
		Lange AE (2013) Magmatic processes beneath mid‐ocean ridges: Insights from mineral and glass chemistry in plagioclase ultraphyric basalts. Oregon State University, PhD thesis 1–1‐270. https://ir.library.oregonstate.edu/concern/graduate_thesis_or_dissertations/h415pd01s

## Sheet: sheet 1
	Major element and Pb-Sr isotope compositions (in wt%) of plagioclase melt inclusions of MORBs from SWIR
					Measured data of MI																							Corrected data of MI													Data of host Pl
	Sample	MI Spot	Zone	No.	Na2O	Al2O3	MgO	SiO2	K2O	TiO2	CaO	NiO	P2O5	FeO	MnO	Cr2O3	Total	208Pb/206Pb	SE	207Pb/206Pb	SE	87Sr/86Sr	SE	Note		x (ratio of Pl addition)	KD (An-Ab)Pl-melt	Na2O	Al2O3	MgO	SiO2	K2O	TiO2	CaO	NiO	P2O5	FeO	MnO	Cr2O3		No.	Na2O	Al2O3	MgO	SiO2	K2O	TiO2	CaO	NiO
	Plagioclases in the thin section of MORBs
	DY34-IV	34TVG-6MI	Segment 27	277	2.451	14.795	8.824	49.62	0.039	1.072	13.216	0		9.025	0.223	0.046	99.311					0.704026	0.000398121	Unhomogenized MI		0.054	0.220223	2.4166	15.7703	8.35782	49.4772	0.039216	1.01541	13.4309	0.000594		8.55839	0.212038	0.044866		276	1.814	32.856	0.191	46.976	0.043	0.024	17.196	0.011
	30IV-TVG04	30TVG-4-2MI	Segment 28	282	2.067	10.968	12.428	49.8	0.024	1.187	13.237	0.024		9.957	0.29	0.072	100.054							Unhomogenized MI		0.245	0.313176	2.04789	16.3161	9.44243	49.1515	0.0191	0.89986	14.2209	0.01812		7.605	0.21895	0.068815		281	1.989	32.797	0.242	47.153	0.004	0.015	17.253	0
	30I-TVG02-1	30I-2-1-1MI	Mount Jourdanne	192	3.37	15.536	7.213	51.77	0.257	1.461	10.504	0		8.192	0.117	0.032	98.452							Unhomogenized MI		0.085	0.324533	3.40298	16.7895	6.61494	51.6978	0.23864	1.33682	10.8075	0.004845		7.5205	0.10901	0.030385		191	3.758	30.283	0.177	50.92	0.041	0	14.075	0.057
	30I-TVG02-1	30I-2-1-2MI	Mount Jourdanne	194	4.107	15.442	7.167	51.078	0.268	1.49	10.229	0.035		8.195	0.179	0.056	98.246	2.1059	0.00438659	0.871815	0.00201876			Unhomogenized MI		0.087	0.239526	4.04288	16.7362	6.55861	51.0463	0.249208	1.36411	10.5763	0.031955		7.5084	0.163427	0.053738		193	3.37	30.318	0.174	50.714	0.052	0.043	14.221	0
	30I-TVG02-1	30I-2-1-2MI-2	Mount Jourdanne	195	4.054	15.351	7.145	51.48	0.257	1.309	10.507	0		8.169	0.15	0.07	98.492							Unhomogenized MI		0.088	0.2456	3.99381	16.6681	6.53155	51.4126	0.23896	1.19759	10.8338	0		7.47679	0.1368	0.06648		193	3.37	30.318	0.174	50.714	0.052	0.043	14.221	0
	30I-TVG02-1	30I-2-1-3 mi-1	Mount Jourdanne	213	4.379	15.736	6.557	51.189	0.288	1.47	10.714	0		8.184	0.174	0.059	98.75	2.11693	0.00397309	0.868023	0.00185567			Unhomogenized MI		0.047	0.250139	4.35009	16.4191	6.25738	51.1618	0.275686	1.40091	10.8794	0.000376		7.8181	0.166104	0.056791		203	3.764	30.271	0.182	50.611	0.026	0	14.233	0.008
	30I-TVG02-1	30I-2-1-3 mi-2	Mount Jourdanne	214	4.265	15.691	7.085	51.271	0.278	1.404	10.452	0.003		8.401	0.156	0.036	99.042							Unhomogenized MI		0.074	0.258993	4.22793	16.7699	6.57418	51.2222	0.259352	1.3001	10.7318	0.00337		7.80885	0.1449	0.034224		203	3.764	30.271	0.182	50.611	0.026	0	14.233	0.008
unequilibrium with host	30I-TVG02-1	30I-2-1-11mi	Mount Jourdanne	224	4.245	15.998	7.743	50.611	0.215	1.269	10.599	0		8.04	0.151	0.059	98.93							Unhomogenized MI		0.094	0.312452	4.22874	17.3015	7.03142	50.7194	0.19761	1.15883	10.8684	0.001786		7.31385	0.13737	0.053454		223	4.072	29.865	0.173	51.764	0.03	0.097	13.465	0.019
unequilibrium with host	30I-TVG02-1	30I-2-1-12MI	Mount Jourdanne	226	4.221	15.249	7.166	51.412	0.239	1.402	10.63	0.007		8.096	0.151	0.032	98.605							Unhomogenized MI		0.094	0.273742	4.18866	16.6578	6.51148	51.3781	0.219918	1.2751	10.962	0.006342		7.36553	0.136806	0.032		225	3.877	30.236	0.203	51.051	0.036	0.052	14.162	0
unequilibrium with host	30I-TVG02-1	30I-2-1-13MI-1	Mount Jourdanne	228	4.244	15.819	7.242	51.347	0.23	1.352	10.608	0		8.011	0.154	0.077	99.084							Unhomogenized MI		0.074	0.27142	4.21514	16.8873	6.72008	51.3236	0.215348	1.25573	10.8741	0		7.44416	0.143122	0.071302		227	3.854	30.255	0.189	51.031	0.032	0.051	14.204	0
unequilibrium with host	30I-TVG02-1	30I-2-1-13MI-2	Mount Jourdanne	229	4.133	15.582	7.259	51.096	0.276	1.339	10.802	0.005		8.039	0.119	0.016	98.666	2.14192	0.00460456	0.864416	0.00189489	0.703067	0.000153639	Unhomogenized MI		0.086	0.284639	4.10901	16.8439	6.65098	51.0904	0.255016	1.22823	11.0946	0.00457		7.37783	0.109368	0.014624		227	3.854	30.255	0.189	51.031	0.032	0.051	14.204	0
unequilibrium with host	30I-TVG02-1	30I-2-1-13MI-3	Mount Jourdanne	230	4.368	15.815	7.148	51.082	0.239	1.292	10.695	0		7.892	0.186	0.096	98.813					0.703313	0.00012063	Unhomogenized MI		0.072	0.266708	4.33099	16.8547	6.64695	51.0783	0.224096	1.20265	10.9476	0		7.34905	0.173112	0.089088		227	3.854	30.255	0.189	51.031	0.032	0.051	14.204	0
unequilibrium with host	30I-TVG02-1	30I-2-1-13MI-4	Mount Jourdanne	231	4.208	15.827	7.267	50.894	0.248	1.381	10.672	0.02		8.02	0.145	0.055	98.737	2.11746	0.00438781	0.867749	0.0021212	0.703517	0.00011397	Unhomogenized MI		0.075	0.277812	4.18145	16.9091	6.73615	50.9043	0.2318	1.28125	10.9369	0.0185		7.44482	0.13465	0.050875		227	3.854	30.255	0.189	51.031	0.032	0.051	14.204	0
unequilibrium with host	30I-TVG02-1	30I-2-1-16mi-1	Mount Jourdanne	235	4.171	15.757	7.231	51.872	0.244	1.22	10.563	0		7.724	0.131	0.046	98.959							Unhomogenized MI		0.078	0.294909	4.16616	16.877	6.68414	51.8564	0.227074	1.1278	10.8218	0.004368		7.14586	0.120782	0.04366		234	4.109	30.116	0.22	51.672	0.027	0.038	13.881	0.056
unequilibrium with host	30I-TVG02-1	30I-2-1-16mi-2	Mount Jourdanne	236	4.208	15.914	7.502	51.303	0.27	1.269	10.985	0		7.912	0.19	0.058	99.611	2.12158	0.0040636	0.86155	0.0020305			Unhomogenized MI		0.084	0.310811	4.19968	17.107	6.89031	51.334	0.249588	1.1656	11.2283	0.004704		7.2736	0.17404	0.054472		234	4.109	30.116	0.22	51.672	0.027	0.038	13.881	0.056
unequilibrium with host	30I-TVG02-1	30I-2-1-16mi-3	Mount Jourdanne	237	4.27	15.917	7.431	51.399	0.237	1.272	10.516	0.017		7.969	0.182	0.033	99.243	2.10193	0.00440849	0.84	0.00206081			Unhomogenized MI		0.08	0.293092	4.25712	17.0529	6.85412	51.4208	0.2202	1.17328	10.7852	0.02012		7.35644	0.16744	0.03164		234	4.109	30.116	0.22	51.672	0.027	0.038	13.881	0.056
unequilibrium with host	30I-TVG02-1	30I-2-1-16mi-4	Mount Jourdanne	238	4.483	15.726	7.286	51.681	0.282	1.292	9.72	0.021		7.737	0.128	0.054	98.41	2.11761	0.00401654	0.868656	0.00206782			Unhomogenized MI		0.081	0.257528	4.45271	16.8916	6.71365	51.6803	0.261345	1.19043	10.057	0.023835		7.13558	0.117632	0.050922		234	4.109	30.116	0.22	51.672	0.027	0.038	13.881	0.056
unequilibrium with host	30I-TVG02-1	30I-2-1-17MI	Mount Jourdanne	249	4.27	15.698	7.449	51.444	0.247	1.573	10.809	0.006		8.018	0.184	0.03	99.728							Unhomogenized MI		0.088	0.278622	4.23066	16.9943	6.81241	51.4383	0.229928	1.43669	11.0902	0.008728		7.33512	0.169392	0.02736		248	3.823	30.429	0.215	51.379	0.053	0.024	14.004	0.037
unequilibrium with host	30I-TVG02-1	30I-2-1-22MI	Mount Jourdanne	255	4.392	15.948	6.877	51.031	0.221	1.28	11.014	0		8.406	0.178	0.061	99.408							Unhomogenized MI		0.05	0.279818	4.37255	16.6829	6.54235	51.0606	0.2129	1.2166	11.1666	0		7.9988	0.1691	0.05885		254	4.003	30.647	0.184	51.623	0.059	0.012	14.067	0
	Plagioclases mounted in epoxy resin disks
unequilibrium with host	30I-TVG02-1	30I-2-1-1	Mount Jourdanne	14	4.033	15.902	6.889	51.263	0.293	1.087	10.242		0.158	7.328	0.143	0.066	97.404	2.13588	0.00365878	0.871079	0.00161629			re-homogenized MI		0.054	0.289969	4.02976	16.6849	6.52796	51.2316	0.278744	1.03197	10.4234		0.149954	6.94676	0.136628	0.062436		15	3.973	30.401	0.203	50.681	0.029	0.068	13.602
unequilibrium with host	30I-TVG02-1	30I-2-1-2	Mount Jourdanne	16	4.314	15.85	6.874	51.26	0.284	1.125	10.113		0.193	7.528	0.145	0.021	97.707	2.11	0.00322186	0.870649	0.00169113			re-homogenized MI		0.054	0.250986	4.28743	16.6315	6.51096	51.2514	0.269744	1.067	10.3241		0.182578	7.13753	0.13717	0.020028		17	3.822	30.322	0.151	51.101	0.02	0.051	14.023
	30I-TVG02-1	30I-2-1-3	Mount Jourdanne	18	4.512	15.881	6.771	51.1	0.294	1.132	9.819		0.218	7.907	0.159	0.025	97.818							re-homogenized MI		0.05	0.230497	4.47605	16.6034	6.4414	51.0782	0.282	1.0776	10.0347		0.2071	7.52875	0.15145	0.0238		19	3.793	30.329	0.179	50.663	0.054	0.044	14.132
	30I-TVG02-1	30I-2-1-4	Mount Jourdanne	20	4.677	16.004	6.185	49.868	0.369	1.521	9.782		0.188	8.888	0.177	0.017	97.676							re-homogenized MI		0.014	0.174946	4.6566	16.2187	6.10026	49.8624	0.3641	1.50024	9.85407		0.185368	8.7682	0.174956	0.016762		21	3.22	31.343	0.132	49.467	0.019	0.038	14.93
	30I-TVG02-1	30I-2-1-5	Mount Jourdanne	22	4.347	15.849	6.879	50.684	0.279	0.9	10.216		0.111	7.777	0.144	0.031	97.217	2.12404	0.00447015	0.871911	0.00250516			re-homogenized MI		0.056	0.233178	4.30265	16.6732	6.50324	50.6398	0.265672	0.85156	10.4483		0.105008	7.3593	0.136328	0.029264		23	3.555	30.566	0.169	49.895	0.041	0.035	14.365
unequilibrium with host	30I-TVG02-1	30I-2-1-6-1	Mount Jourdanne	24	4.348	15.875	6.87	51.801	0.335	0.958	9.996		0.202	7.623	0.113	0.047	98.168	2.12623	0.0040111	0.869814	0.00194436			re-homogenized MI		0.055	0.286975	4.34239	16.6377	6.50276	51.796	0.319655	0.90718	10.1675		0.19111	7.2221	0.106785	0.044415		26	4.246	29.742	0.193	51.71	0.056	0.034	13.114
unequilibrium with host	30I-TVG02-1	30I-2-1-6-2	Mount Jourdanne	25	4.345	15.886	7.116	50.566	0.31	1.063	9.889		0.253	7.946	0.182	0.003	97.559	2.11883	0.00299551	0.870151	0.00162453			re-homogenized MI		0.066	0.294742	4.33847	16.8005	6.65908	50.6415	0.293236	0.995086	10.1018		0.236566	7.44361	0.169988	0.002802		26	4.246	29.742	0.193	51.71	0.056	0.034	13.114
	30I-TVG02-1	30I-2-1-7	Mount Jourdanne	27	4.241	15.761	6.891	50.882	0.295	0.929	10.289		0.146	7.624	0.129	0.046	97.233	2.09145	0.00402531	0.838246	0.00215229			re-homogenized MI		0.062	0.251875	4.20337	16.6624	6.47554	50.8482	0.278756	0.872332	10.5152		0.137506	7.17047	0.12218	0.043148		28	3.634	30.3	0.19	50.337	0.033	0.015	13.938
	30I-TVG02-1	30I-2-1-8	Mount Jourdanne	29	4.049	15.819	7.695	50.277	0.291	1.027	10.435		0.128	7.538	0.143	0.055	97.457	2.12673	0.00392611	0.868834	0.00182464			re-homogenized MI		0.094	0.261561	3.99486	17.2069	6.98709	50.2375	0.267688	0.930744	10.8184		0.117566	6.85302	0.129652	0.050676		30	3.473	30.584	0.164	49.857	0.043	0.003	14.514
unequilibrium with host	30I-TVG02-1	30I-2-1-9-1	Mount Jourdanne	31	4.427	15.937	6.439	50.847	0.298	1.213	10.156		0.235	7.61	0.175	0.013	97.35	2.15549	0.00483237	0.870454	0.00221526			re-homogenized MI		0.03	0.29187	4.42475	16.3618	6.2512	50.8648	0.2902	1.17745	10.2439		0.229	7.39097	0.16975	0.01261		33	4.352	30.098	0.179	51.441	0.038	0.028	13.086
unequilibrium with host	30I-TVG02-1	30I-2-1-9-2	Mount Jourdanne	32	4.419	15.9	6.361	50.919	0.316	1.202	10.083		0.192	7.923	0.132	0	97.447	2.13444	0.00426222	0.870296	0.0022101			re-homogenized MI		0.03	0.289328	4.41699	16.3259	6.17554	50.9347	0.30766	1.16678	10.1731		0.18729	7.69458	0.12804	0		33	4.352	30.098	0.179	51.441	0.038	0.028	13.086
	30I-TVG02-1	30I-2-1-10	Mount Jourdanne	34	4.493	15.892	7.033	50.421	0.293	1.178	10.088		0.171	7.865	0.189	0.029	97.652	2.12626	0.00443467	0.868617	0.00210892			re-homogenized MI		0.058	0.235509	4.44544	16.7536	6.63535	50.4176	0.277572	1.10968	10.3257		0.162068	7.42733	0.17914	0.027318		35	3.673	30.747	0.177	50.363	0.027	0	14.186
	30I-TVG02-1	30I-2-1-10-2	Mount Jourdanne	36	4.418	15.772	7.2	50.377	0.333	1.272	9.651		0.218	7.751	0.208	0.062	97.262	2.11058	0.00722821	0.877636	0.00349921			re-homogenized MI		0.074	0.234032	4.36287	16.8802	6.6803	50.376	0.310356	1.17787	9.98659		0.203126	7.20103	0.194014	0.057412		35	3.673	30.747	0.177	50.363	0.027	0	14.186
unequilibrium with host	30I-TVG02-1	30I-2-1-11	Mount Jourdanne	37	4.74	15.829	7.078	50.446	0.399	1.244	9.406		0.235	7.95	0.115	0.022	97.464							re-homogenized MI		0.066	0.229028	4.68133	16.7855	6.62168	50.4715	0.375966	1.16368	9.68505		0.220084	7.44319	0.10807	0.020548		38	3.851	30.322	0.164	50.832	0.05	0.027	13.634
	30I-TVG02-1	30I-2-1-12	Mount Jourdanne	39	4.304	15.012	7.068	49.977	0.301	1.278	10.006		0.299	8.673	0.152	0.033	97.103	2.11826	0.00675356	0.873261	0.00386089			re-homogenized MI		0.096	0.251969	4.24774	16.5448	6.40598	50.0203	0.275272	1.15954	10.3969		0.270296	7.8715	0.13808	0.029832		40	3.718	30.979	0.172	50.428	0.033	0.044	14.078
unequilibrium with host	30I-TVG02-1	30I-2-1-13	Mount Jourdanne	41	4.218	14.597	6.525	51.739	0.397	1.307	9.24		0.248	8.883	0.144	0.013	97.311	2.11965	0.00592113	0.872329	0.00289392			re-homogenized MI		0.098	0.319965	4.27778	16.044	5.90544	51.8702	0.363288	1.18009	9.53606		0.224578	8.05039	0.13077	0.011726		42	4.828	29.362	0.203	53.078	0.053	0.012	12.261
unequilibrium with host	30I-TVG02-1	30I-2-1-14	Mount Jourdanne	43	4.481	15.965	6.772	50.979	0.334	1.245	10.082		0.231	7.719	0.15	0.032	97.99							re-homogenized MI		0.046	0.264687	4.46035	16.6227	6.46872	50.998	0.320016	1.18962	10.2359		0.221754	7.37952	0.143744	0.031126		44	4.032	30.262	0.179	51.392	0.03	0.041	13.428
unequilibrium with host	30I-TVG02-1	30I-2-1-15	Mount Jourdanne	45	4.589	16.437	7.04	50.655	0.328	1.077	10.257		0.188	7.763	0.105	0.037	98.476	2.1254	0.00551139	0.871187	0.00254163			re-homogenized MI		0.038	0.253841	4.56236	16.9882	6.77867	50.6596	0.317208	1.0368	10.3911		0.182984	7.4802	0.10101	0.035594		46	3.888	30.942	0.163	50.777	0.044	0.019	13.786
unequilibrium with host	30I-TVG02-1	30I-2-1-16	Mount Jourdanne	47	4.392	15.811	6.616	50.927	0.254	1.095	10.347		0.209	7.79	0.121	0.044	97.606	2.11399	0.00444988	0.871386	0.00209333			re-homogenized MI		0.046	0.28009	4.38087	16.4728	6.32082	50.935	0.243742	1.04684	10.4932		0.201364	7.44767	0.115848	0.041976		48	4.15	30.199	0.199	51.1	0.031	0.048	13.526
unequilibrium with host	30I-TVG02-1	30I-2-1-17	Mount Jourdanne	49	4.539	15.709	5.892	50.523	0.381	1.179	9.786		0.243	9.233	0.183	0.017	97.685	2.13232	0.00473375	0.875527	0.00219339			re-homogenized MI		0.016	0.226247	4.52902	15.9519	5.79998	50.5232	0.375688	1.16084	9.85355		0.239112	9.09028	0.1802	0.017064		50	3.915	30.888	0.141	50.537	0.049	0.044	14.008
unequilibrium with host	30I-TVG02-1	30I-2-1-18	Mount Jourdanne	51	4.648	16.037	6.513	51.585	0.316	0.864	9.667		0.047	7.901	0.176	0.039	97.793	2.11244	0.00389957	0.864648	0.00206767			re-homogenized MI		0.029	0.247226	4.63472	16.4546	6.32885	51.5836	0.308489	0.839089	9.77639		0.046275	7.68086	0.171157	0.037869		52	4.19	30.436	0.163	51.537	0.057	0.005	13.439
unequilibrium with host	30I-TVG02-1	30I-2-1-19	Mount Jourdanne	53	4.754	16.1	6.793	51.377	0.397	0.803	9.454		0.154	7.572	0.157	0.036	97.597	2.12261	0.00285397	0.867086	0.0016456			re-homogenized MI		0.041	0.226495	4.72198	16.7007	6.5224	51.3498	0.381502	0.771143	9.62845		0.147686	7.27401	0.150973	0.034524		54	3.973	30.751	0.193	50.713	0.019	0.026	13.709
	30I-TVG02-1	30I-2-1-20	Mount Jourdanne	55	4.432	15.928	7.153	50.211	0.302	1.271	10.017		0.209	7.361	0.157	0.086	97.127	2.11393	0.00359735	0.868335	0.00163546			re-homogenized MI		0.064	0.233888	4.37818	16.894	6.70602	50.1997	0.283696	1.19151	10.292		0.195624	6.90974	0.147208	0.08056		56	3.591	31.021	0.169	50.034	0.016	0.029	14.314
unequilibrium with host	30I-TVG02-1	30I-2-1-21	Mount Jourdanne	57	4.714	16.039	5.914	51.172	0.377	1.095	9.436		0.205	8.632	0.165	0.015	97.764							re-homogenized MI		0.001	0.229455	4.71343	16.0533	5.90825	51.1722	0.376683	1.09394	9.43992		0.204864	8.62369	0.164838	0.015024		58	4.139	30.302	0.163	51.365	0.06	0.035	13.356
unequilibrium with host	30I-TVG02-1	IndianMI-01	Mount Jourdanne	IndianMI-01*	4.22538	15.1249	7.01289	52.0981		1.24938			0.141277	8.40783	0.165243			2.11643	0.00944626	0.873587	0.00512922			re-homogenized MI		0.09		4.2176	16.4908	6.3964	52.0321		1.14008			0.134772	7.6802	0.150641	0.00351		58	4.139	30.302	0.163	51.365	0.06	0.035	13.356
unequilibrium with host	30I-TVG02-1	IndianMI-02	Mount Jourdanne	IndianMI-02*	4.22172	15.2674	7.0911	52.871		1.11923			0.119905	8.37826	0.164121			2.12465	0.00822403	0.879241	0.00430921			re-homogenized MI		0.092		4.21411	16.6506	6.45372	52.7324		1.01948			0.115222	7.63717	0.149297	0.003588		58	4.139	30.302	0.163	51.365	0.06	0.035	13.356
unequilibrium with host	30I-TVG02-1	IndianMI-03a	Mount Jourdanne	IndianMI-03a*	4.5175	15.6616	7.02173	52.032		1.25105			0.151723	8.19966	0.167935			2.11542	0.00826355	0.868189	0.00391807			re-homogenized MI		0.076		4.48874	16.7743	6.50046	51.9813		1.15863			0.145436	7.60104	0.1554	0.002964		58	4.139	30.302	0.163	51.365	0.06	0.035	13.356
unequilibrium with host	30I-TVG02-1	IndianMI-03b	Mount Jourdanne	IndianMI-03b*	4.60812	15.6764	6.69703	50.9735		1.83878			0.256744	8.79229	0.173737			2.11924	0.00746049	0.870738	0.00319533			re-homogenized MI		0.056		4.58185	16.4954	6.33113	50.9954		1.73777			0.24623	8.31801	0.164175	0.002184		58	4.139	30.302	0.163	51.365	0.06	0.035	13.356
unequilibrium with host	30I-TVG02-1	IndianMI-04	Mount Jourdanne	IndianMI-04*	4.38034	15.4864	7.25677	51.824		1.22549			0.147231	8.46963	0.167292			2.12375	0.00690891	0.874881	0.00309585			re-homogenized MI		0.092		4.35813	16.8494	6.60415	51.7818		1.11597			0.140034	7.72014	0.152177	0.003588		58	4.139	30.302	0.163	51.365	0.06	0.035	13.356
unequilibrium with host	30I-TVG02-1	IndianMI-05	Mount Jourdanne	IndianMI-05*	4.50084	15.8536	7.03089	50.4336		1.66601			0.206238	9.18143	0.177941			2.11325	0.00779167	0.872798	0.00360703			re-homogenized MI		0.066		4.47696	16.8072	6.57761	50.4951		1.55836			0.19718	8.59678	0.166395	0.002574		58	4.139	30.302	0.163	51.365	0.06	0.035	13.356
unequilibrium with host	30I-TVG02-1	IndianMI-06	Mount Jourdanne	IndianMI-06*	4.49161	15.6011	7.10648	51.9932		1.18947			0.14923	8.44834	0.168729			2.11395	0.00758179	0.870534	0.00323156			re-homogenized MI		0.082		4.4627	16.8066	6.53711	51.9417		1.0948			0.142652	7.78206	0.155139	0.003198		58	4.139	30.302	0.163	51.365	0.06	0.035	13.356
unequilibrium with host	30I-TVG02-1	IndianMI-07	Mount Jourdanne	IndianMI-07*	4.32016	15.1704	7.32171	51.9701		1.31808			0.168673	8.82098	0.175846			2.1206	0.00601117	0.866566	0.0024895			re-homogenized MI		0.102		4.30168	16.7138	6.59152	51.9084		1.1872			0.158506	7.95419	0.158216	0.003978		58	4.139	30.302	0.163	51.365	0.06	0.035	13.356
unequilibrium with host	30I-TVG02-1	IndianMI-8a	Mount Jourdanne	IndianMI-8a*	4.2862	15.4515	7.43865	51.2809		1.35423			0.173136	8.83917	0.174415			2.11532	0.00583679	0.86725	0.00310539			re-homogenized MI		0.098		4.27177	16.9068	6.72564	51.2892		1.22494			0.16293	8.00459	0.157616	0.003822		58	4.139	30.302	0.163	51.365	0.06	0.035	13.356
unequilibrium with host	30I-TVG02-1	IndianMI-8b	Mount Jourdanne	IndianMI-8b*	4.34785	15.3949	7.69449	51.5421		1.36712			0.186964	8.38711	0.171016			2.11373	0.00638247	0.871349	0.00296849			re-homogenized MI		0.116		4.32362	17.1242	6.82083	51.5215		1.21259			0.173281	7.45168	0.151526	0.004524		58	4.139	30.302	0.163	51.365	0.06	0.035	13.356
unequilibrium with host	30I-TVG02-1	IndianMI-9a	Mount Jourdanne	IndianMI-9a*	4.41905	15.4568	7.33578	51.392		1.39452			0.180477	8.71449	0.16853			2.11193	0.0067699	0.857398	0.00310993			re-homogenized MI		0.09		4.39385	16.7929	6.69023	51.3895		1.27216			0.170444	7.95925	0.153633	0.00351		58	4.139	30.302	0.163	51.365	0.06	0.035	13.356
unequilibrium with host	30I-TVG02-1	IndianMI-9b	Mount Jourdanne	IndianMI-9b*	4.3617	15.5625	7.24878	51.3207		1.36278			0.178319	8.61811	0.172275			2.10791	0.00850962	0.862402	0.00384538			re-homogenized MI		0.09		4.34165	16.889	6.61106	51.3247		1.24328			0.16848	7.87155	0.15704	0.00351		58	4.139	30.302	0.163	51.365	0.06	0.035	13.356
unequilibrium with host	30I-TVG02-1	IndianMI-10	Mount Jourdanne	IndianMI-10*	4.70585	15.9006	7.24229	51.9302		1.19803			0.151328	7.906	0.164923			2.13152	0.00705023	0.865331	0.00306557			re-homogenized MI		0.078		4.66163	17.0239	6.69011	51.8861		1.10732			0.144906	7.31453	0.152293	0.003042		58	4.139	30.302	0.163	51.365	0.06	0.035	13.356
unequilibrium with host	30I-TVG02-1	IndianMI-11	Mount Jourdanne	IndianMI-11*	4.43269	15.6608	7.46999	51.2852		1.33557			0.167539	8.19911	0.16688			2.12613	0.00886077	0.866502	0.00411441			re-homogenized MI		0.092		4.40567	17.0078	6.79775	51.2926		1.21592			0.158474	7.47451	0.151803	0.003588		58	4.139	30.302	0.163	51.365	0.06	0.035	13.356
unequilibrium with host	30I-TVG02-1	IndianMI-12	Mount Jourdanne	IndianMI-12*	4.61379	15.1547	7.28047	52.5343		1.36619			0.194285	8.12104	0.162161			2.07611	0.00744327	0.849384	0.00309916			re-homogenized MI		0.108		4.56251	16.7906	6.51178	52.408		1.22242			0.180754	7.27885	0.144971	0.004212		58	4.139	30.302	0.163	51.365	0.06	0.035	13.356
	Post-entrapment crystallization (PEC) of plagioclase along the walls of the melt inclusion (MI) will drive the inclusion composition away from the composition of plagioclase, enriching the inclusion in elements incompatible in plagioclase, such as Mg and Fe (Bryan, 1983; Grove et al., 1992). Based on MI homogenization experiments and the phase equilibria of MORB (Bryan, 1983; Grove et al., 1992; …																	2.15549		0.879241										7.03142
																		2.07611		0.838246										5.79998
	Script "*"	The data supplement (major elements) to the MI in Zhang L et al. (2020 GC)
	An_h, Ab_h and Or_h	Anorthite, albite and orthoclase content of the hosting plagioclase
	FeOt_i	Total FeO of the initial trapped melt
	KD (An-Ab)Pl-melt	Equilibrium constant between MI and its host Pl. The equilibrium constant for An-Ab exchange, might be more useful as a test for equilibrium, because although it clearly varies with T, P and H2O, the values are normally distributed, and when divided over two temperature intervals yield KD(An-Ab)pl-liq = X(Ab of Pl)*X(AlO1.5 of melt, mole)*X(CaO of melt, mole)/X(An of Pl)*X(NaO1.5 of melt, mole) *…
	Sample	MI Spot	Zone	No.	Na2O	Al2O3	MgO	SiO2	K2O	TiO2	CaO	NiO	P2O5	FeO	MnO	Cr2O3	Total	208Pb/206Pb	SE	207Pb/206Pb	SE	87Sr/86Sr	SE	Note		x (ratio of Pl addition)	KD (An-Ab)Pl-melt	Na2O	Al2O3	MgO	SiO2	K2O	TiO2	CaO	NiO	P2O5	FeO	MnO	Cr2O3		No.	Na2O	Al2O3	MgO	SiO2	K2O	TiO2	CaO	NiO
(a)	20VII-L12	1-A-MI1	segment 27	645	1.77	9.92	12.15	50.57	0.16	1.05	10.36	0.03	0.04	12.62	0.23	0.03	98.91									0.3	0.355334	1.938	16.253	8.565	49.835	0.121	0.735	11.905	0.036	0.028	8.933	0.161	0.021		1-A-MI1-plg	2.33	31.03	0.2	48.12	0.03		15.51	0.05
(a)	20VII-L12	1-B-2-MI1	segment 27	486	1.5	8.81	12.47	49.38	0.07	0.72	11.33	0.08		13.06	0.3	0.12	97.87									0.31	0.357397	1.6147	16.0702	8.6756	48.9026	0.0514	0.4968	12.8273	0.0552	0.0062	9.1323	0.207	0.0828		1-B-plg	1.87	32.23	0.23	47.84	0.01		16.16
(a)	20VII-L12	1-B-2-MI2	segment 27	487	1.47	8.76	12.77	49.64	0.07	0.81	11.43		0.01	13.24	0.25	0.01	98.51									0.32	0.367732	1.598	16.2704	8.7572	49.064	0.0508	0.5508	12.9436	0	0.0132	9.128	0.17	0.0068		1-B-plg	1.87	32.23	0.23	47.84	0.01		16.16
(a)	20VII-L12	1-D-MI1	segment 27	621	1.06	8.82	12.61	50.93	0.06	0.7	11.01		0.01	12.84	0.28	0.07	98.39									0.32	0.40517	1.2616	16.5	8.6388	49.8772	0.0408	0.4888	12.7892	0.0096	0.0068	8.8816	0.1904	0.054		1-D-plg	1.69	32.82	0.2	47.64		0.04	16.57	0.03
(a)	20VII-L12	1-D-MI2	segment 27	622	1.36	8.54	12.83	50.17	0.07	0.91	11.25	0.03	0.05	13.3	0.24	0.06	98.84									0.32	0.352804	1.4656	16.3096	8.7884	49.3604	0.0476	0.6316	12.9524	0.03	0.034	9.1944	0.1632	0.0472		1-D-plg	1.69	32.82	0.2	47.64		0.04	16.57	0.03
(a)	20VII-L12	1-D-MI3	segment 27	623	1.81	9.01	11.89	48.39	0.08	0.79	11.35		0.01	12.8	0.27	0.04	96.43									0.3	0.295006	1.774	16.153	8.383	48.165	0.056	0.565	12.916	0.009	0.007	9.101	0.189	0.034		1-D-plg	1.69	32.82	0.2	47.64		0.04	16.57	0.03
(a)	20VII-L12	1-D-MI4	segment 27	624	2.04	8.98	12.45	49.5	0.08	0.75	11.62	0.03	0.04	13.16	0.32		98.97									0.32	0.281009	1.928	16.6088	8.53	48.9048	0.0544	0.5228	13.204	0.03	0.0272	9.0992	0.2176	0.0064		1-D-plg	1.69	32.82	0.2	47.64		0.04	16.57	0.03
(a)	20VII-L12	2-A-MI1	segment 27	607	2.47	14.66	8.76	48.51	0.11	1.03	11.79	0.01	0.08	8.58	0.14	0.01	96.19									0.06	0.207861	2.4286	15.689	8.2482	48.459	0.1046	0.9694	12.057	0.0112	0.0764	8.0814	0.1322	0.0118		2-A-plg	1.78	31.81	0.23	47.66	0.02	0.02	16.24	0.03
(a)	20VII-L12	2-A-MI10	segment 27	617	2.9	15.68	8.51	49.47	0.05	0.72	12.07	0.01	0.1	8.61	0.17		98.3									0.03	0.183666	2.8679	16.1636	8.2607	49.4115	0.0485	0.7002	12.1996	0.01	0.097	8.3634	0.1652	0		2-A-MI10-plg	1.83	31.8	0.2	47.52		0.06	16.39	0.01
(a)	20VII-L12	2-A-MI11	segment 27	618	2.86	14.8	8.9	49.43	0.08	0.74	11.52	0.08	0.05	8.28	0.19		96.93									0.04	0.149166	2.8104	15.4996	8.552	49.3156	0.0776	0.7104	11.7332	0.0792	0.0484	7.962	0.1824	0.0016		2-A-MI1-plg	1.62	32.29	0.2	46.57	0.02		16.85	0.06
(a)	20VII-L12	2-A-MI2	segment 27	609	2.75	13.51	9.96	50.15	0.09	0.44	11.11	0.04	0.01	9.9	0.16	0.08	98.24									0.15	0.192622	2.6045	16.255	8.5005	49.7765	0.0795	0.377	11.8795	0.0385	0.0115	8.4555	0.1375	0.074		2-A-plg	1.78	31.81	0.23	47.66	0.02	0.02	16.24	0.03
(a)	20VII-L12	2-A-MI3	segment 27	610	2.44	14.32	9.3	50.75	0.07	0.63	11.16	0.04	0.04	9.37	0.17	0.06	98.38									0.11	0.206279	2.3674	16.2439	8.3023	50.4101	0.0645	0.5629	11.7188	0.0389	0.0378	8.369	0.1524	0.0578		2-A-plg	1.78	31.81	0.23	47.66	0.02	0.02	16.24	0.03
(a)	20VII-L12	2-A-MI4	segment 27	611	2.84	13.23	9.82	50.28	0.07	0.4	10.99		0.03	9.48	0.22	0.07	97.48									0.13	0.175009	2.7022	15.6454	8.5733	49.9394	0.0635	0.3506	11.6725	0.0039	0.0287	8.2827	0.1927	0.0661		2-A-plg	1.78	31.81	0.23	47.66	0.02	0.02	16.24	0.03
(a)	20VII-L12	2-A-MI5	segment 27	612	1.98	13.81	9.75	50.84	0.08	0.5	11.03	0.09		9.53	0.18	0.01	97.86									0.13	0.24815	1.954	16.15	8.5124	50.4266	0.0722	0.4376	11.7073	0.0822	0.0026	8.3262	0.1579	0.0139		2-A-plg	1.78	31.81	0.23	47.66	0.02	0.02	16.24	0.03
(a)	20VII-L12	2-A-MI6	segment 27	613	2.14	12.62	10.42	50.71	0.08	0.41	10.93	0.01	0.03	9.69	0.3	0.02	97.44									0.17	0.232929	2.0788	15.8823	8.6877	50.1915	0.0698	0.3437	11.8327	0.0134	0.0283	8.0886	0.2507	0.0234		2-A-plg	1.78	31.81	0.23	47.66	0.02	0.02	16.24	0.03
(a)	20VII-L12	2-A-MI7	segment 27	614	2.2	13.16	10.15	48.95	0.13	0.9	11.38	0.01	0.09	9.1	0.29	0.01	96.4									0.17	0.248515	2.1286	16.3305	8.4636	48.7307	0.1113	0.7504	12.2062	0.0134	0.0781	7.5989	0.2424	0.0151		2-A-plg	1.78	31.81	0.23	47.66	0.02	0.02	16.24	0.03
(a)	20VII-L12	2-A-MI8	segment 27	615	2.05	13.71	9.65	50.32	0.09	0.37	11.35		0.02	9.39	0.21	0.03	97.37									0.14	0.251541	2.0122	16.244	8.3312	49.9476	0.0802	0.321	12.0346	0.0042	0.02	8.1132	0.182	0.0314		2-A-plg	1.78	31.81	0.23	47.66	0.02	0.02	16.24	0.03
(a)	20VII-L12	2-A-MI9	segment 27	616	2.03	13.29	9.82	50.09	0.08	0.45	11.21	0.03	0	9.48	0.19	0.04	96.75									0.14	0.246563	1.995	15.8828	8.4774	49.7498	0.0716	0.3898	11.9142	0.03	0.0028	8.1906	0.1648	0.04		2-A-plg	1.78	31.81	0.23	47.66	0.02	0.02	16.24	0.03
(a)	20VII-L12	2-B-MI1	segment 27	479	2.94	15.18	7.6	49.23	0.09	0.49	11.41		0.03	10.36	0.15	0	97.46									-0.02	0.126283	2.9678	14.8408	7.7482	49.2866	0.0916	0.499	11.3058	-0.0014	0.0306	10.5588	0.153	-0.0014		2-B-MI2-plg	1.55	32.14	0.19	46.4	0.01	0.04	16.62	0.07
(a)	20VII-L12	2-B-MI2	segment 27	480	2.98	15.13	7.41	48.15	0.07	0.85	11.84	0.1	0.11	10.46	0.2	0.04	97.34									-0.03	0.129197	3.0229	14.6197	7.6266	48.2025	0.0718	0.8743	11.6966	0.1009	0.1133	10.7612	0.206	0.0391		2-B-MI2-plg	1.55	32.14	0.19	46.4	0.01	0.04	16.62	0.07
(a)	20VII-L12	2-D-MI1	segment 27	489	3.34	16.56	6.75	50.63	0.08	1.11	11.46	0.01	0.09	9.05	0.17	0.04	99.31									-0.13	0.171696	3.4609	14.6464	7.6002	50.8263	0.0891	1.253	10.9777	0.01	0.1017	10.1615	0.1921	0.0452		2-D-MI1-plg	2.41	31.28	0.21	49.12	0.01	0.01	15.17	0.01
(a)	20VII-L12	2-E-2-MI1	segment 27	634	2.84	15.95	7.8	49.53	0.05	0.5	11.88		0.04	8.79	0.16	0.05	97.6									-0.05	0.159951	2.8925	15.135	8.1815	49.616	0.052	0.525	11.6575	0	0.0415	9.211	0.166	0.049		2-E-2-plg	1.79	32.25	0.17	47.81	0.01		16.33
(a)	20VII-L12	2-E-2-MI3	segment 27	635	2.49	14.84	7.8	50.35	0.13	0.98	11.65	0.02	0.08	8.4	0.13	0.01	96.86									0	0.179413	2.49	14.84	7.8	50.35	0.13	0.98	11.65	0.02	0.08	8.4	0.13	0.01		2-E-2-plg	1.79	32.25	0.17	47.81	0.01		16.33
(a)	20VII-L12	2-E-2-MI5	segment 27	636	2.47	15.11	8.05	50.65	0.11	1.04	11.74	0.08	0.1	8.87	0.19		98.4									0	0.18448	2.47	15.11	8.05	50.65	0.11	1.04	11.74	0.08	0.1	8.87	0.19	0		2-E-2-plg	1.79	32.25	0.17	47.81	0.01		16.33
(a)	20VII-L12	2-E-3-MI1	segment 27	638	3.12	15.65	8.76	52.96	0.07	0.49	11.17	0.01	0.03	8.63	0.12	0.06	101.06									0.01	0.191567	3.112	15.8105	8.6753	52.9238	0.0694	0.4852	11.213	0.0101	0.0297	8.5472	0.1188	0.0594		2-E-3-plg	2.32	31.7	0.29	49.34	0.01	0.01	15.47	0.02
(a)	20VII-L12	2-E-3-MI3	segment 27	639	3.13	15.31	8.39	52.31	0.09	0.41	11.08	0.02	0.03	8.07	0.21	0.02	99.05									0.03	0.194408	3.1057	15.8017	8.147	52.2209	0.0876	0.398	11.2117	0.02	0.0291	7.8384	0.2037	0.0194		2-E-3-plg	2.32	31.7	0.29	49.34	0.01	0.01	15.47	0.02
(a)	20VII-L12	2-F-MI1a	segment 27	577	2.71	14.58	8.06	50.61	0.08	0.72	11.53	0.02	0.02	9.35	0.23	0.06	97.98									0.03	0.208456	2.6929	15.0855	7.8239	50.5431	0.0779	0.699	11.6545	0.0194	0.0194	9.0836	0.2231	0.0588		2-F-MI1-plg	2.14	31.43	0.19	48.38	0.01	0.02	15.68
(a)	20VII-L12	2-F-MI1b	segment 27	578	2.66	14.38	7.92	50.68	0.08	0.74	11.54	0.06		9.45	0.19		97.69									0.03	0.209442	2.6444	14.8915	7.6881	50.611	0.0779	0.7184	11.6642	0.0582	0	9.1806	0.1843	0.0006		2-F-MI1-plg	2.14	31.43	0.19	48.38	0.01	0.02	15.68
(a)	20VII-L12	2-F-MI2	segment 27	580	2.67	14.88	7.88	50.6	0.23	0.75	10.93	0.03	0.04	9.01	0.15	0.03	97.2									0.01	0.202762	2.6653	15.0461	7.8032	50.5734	0.2278	0.7426	10.9782	0.03	0.0399	8.9244	0.1485	0.0297		2-F-MI2-plg	2.2	31.49	0.2	47.94	0.01	0.01	15.75	0.03
(a)	20VII-L12	2-G-MI1	segment 27	574	2.14	13.56	12.38	48.33	0.06	0.5	11.34			9.5	0.14	0.04	97.98									0.1	0.168158	2.056	15.506	11.161	48.143	0.055	0.45	11.916	0	0.001	8.573	0.127	0.037		2-G-plg	1.3	33.02	0.19	46.46	0.01		17.1
(a)	20VII-L12	2-G-MI2	segment 27	575	2.92	16.13	9.02	48.47	0.04	0.71	12.2	0	0.07	8.45	0.21	0.01	98.23									0.04	0.132307	2.8548	16.8256	8.6652	48.3872	0.0388	0.6816	12.4068	0	0.0672	8.1236	0.2032	0.0096		2-G-MI2-plg	1.29	33.52	0.15	46.4	0.01	0	17.37
(a)	20VII-L12	3-A-MI1	segment 27	566	3.18	14.94	8.91	50.52	0.04	0.58	11.64		0.03	8.7	0.24	0.11	98.94									0.04	0.16817	3.1316	15.632	8.5612	50.4152	0.0392	0.5576	11.8228	0.002	0.0292	8.3656	0.232	0.1056		3-A-MI1-plg	1.97	32.24	0.19	47.9	0.02	0.02	16.21	0.05
(a)	20VII-L12	3-A-MI2	segment 27	567	3.13	15.11	8.88	50.25	0.06	0.58	11.61		0.01	8.29	0.15	0.04	98.15									0.04	0.17304	3.0836	15.7952	8.5324	50.156	0.0584	0.5576	11.794	0.002	0.01	7.972	0.1456	0.0384		3-A-MI1-plg	1.97	32.24	0.19	47.9	0.02	0.02	16.21	0.05
(a)	20VII-L12	3-A-MI3	segment 27	568	3.08	14.94	9.03	50.08	0.05	0.56	11.59		0.03	9.13	0.19	0.05	98.74									0.06	0.180978	3.0134	15.978	8.4996	49.9492	0.0482	0.5276	11.8672	0.003	0.0288	8.6026	0.181	0.047		3-A-MI1-plg	1.97	32.24	0.19	47.9	0.02	0.02	16.21	0.05
(a)	20VII-L12	3-A-MI4	segment 27	569	2.89	14.93	8.75	49.85	0.06	0.66	11.77		0.03	8.41	0.14	0.07	97.55									0.05	0.192319	2.844	15.7955	8.322	49.7525	0.058	0.628	11.992	0.0025	0.029	8.0065	0.135	0.0665		3-A-MI1-plg	1.97	32.24	0.19	47.9	0.02	0.02	16.21	0.05
(a)	20VII-L12	3-A-MI5	segment 27	570	2.5	14.98	9.17	51.4	0.07	0.5	11.43		0.04	8.44	0.25	0.05	98.82									0.05	0.209613	2.4735	15.843	8.721	51.225	0.0675	0.476	11.669	0.0025	0.0385	8.035	0.2395	0.0475		3-A-MI1-plg	1.97	32.24	0.19	47.9	0.02	0.02	16.21	0.05
(a)	20VII-L12	3-A-MI6	segment 27	571	3.07	14.7	9.25	50.95	0.05	0.39	11.24		0.04	9.12	0.12	0.09	99.02									0.08	0.178053	2.982	16.1032	8.5252	50.706	0.0476	0.3604	11.6376	0.004	0.0376	8.4176	0.1136	0.0828		3-A-MI1-plg	1.97	32.24	0.19	47.9	0.02	0.02	16.21	0.05
(a)	20VII-L12	3-A-MI7	segment 27	491	3.03	16	8.56	50.3	0.06	0.73	11.96		0.08	8.47	0.12	0.09	99.4									0.03	0.186192	2.997	16.4923	8.3098	50.2322	0.0585	0.7081	12.0899	0.003	0.0776	8.2264	0.1176	0.0888		3-A-MI7-plg	1.93	32.41	0.22	48.04	0.01		16.29	0.1
(a)	20VII-L12	3-B-MI1	segment 27	631	2.49	15.8	8.41	49.83	0.14	1.01	11.9	0.01	0.11	8.47	0.15	0.03	98.43									0.02	0.206401	2.4766	16.1416	8.2464	49.7928	0.1384	0.9904	11.9894	0.0098	0.1084	8.309	0.1476	0.0296		3-B-MI1-plg	1.82	32.88	0.23	47.97	0.06	0.03	16.37
(a)	20VII-L12	3-C-MI1	segment 27	626	2.21	13.91	7.93	48.09	0.17	1.07	11.2		0.15	10.33	0.17		95.22									0.03	0.237265	2.2064	14.45	7.6978	48.0813	0.1649	1.0388	11.3467	0	0.1455	10.0345	0.1652	0.0012		3-C-MI5-plg	2.09	31.91	0.19	47.8	0	0.03	16.09
(a)	20VII-L12	3-C-MI2	segment 27	627	3.14	13.67	8.26	49.07	0.45	1.1	11.01	0.04	0.09	9.36	0.25	0.02	96.47									0.05	0.16665	3.0875	14.582	7.8565	49.0065	0.4275	1.0465	11.264	0.038	0.0855	8.916	0.238	0.021		3-C-MI5-plg	2.09	31.91	0.19	47.8	0	0.03	16.09
(a)	20VII-L12	3-C-MI3	segment 27	628	2.2	14.75	7.52	49.36	0.24	0.94	11.21		0.05	10.24	0.22		96.72									0	0.233753	2.2	14.75	7.52	49.36	0.24	0.94	11.21	0	0.05	10.24	0.22	0		3-C-MI5-plg	2.09	31.91	0.19	47.8	0	0.03	16.09
(a)	20VII-L12	3-C-MI5	segment 27	629	3.01	15.88	7.24	49.55	0.05	1.02	11.39	0.04	0.11	9.39	0.22		97.89									-0.06	0.167143	3.0652	14.9182	7.663	49.655	0.053	1.0794	11.108	0.0424	0.1166	9.9246	0.2326	-0.0024		3-C-MI5-plg	2.09	31.91	0.19	47.8	0	0.03	16.09
(a)	20VII-L12	3-D-MI5	segment 27	647	2.43	15.87	10.6	49.31	0.03	0.44	11.8	0.05	0.02	7.41	0.07	0.41	98.5									0	0.136673	2.43	15.87	10.6	49.31	0.03	0.44	11.8	0.05	0.02	7.41	0.07	0.41		3-D-plg	1.27	33.11	0.24	46.53	0.01	0.01	17.25	0.03
(a)	20VII-L12	3-D-MI6	segment 27	648	2.58	15.86	10.37	50.12	0.05	0.4	11.98		0.03	7.15	0.11	0.04	98.78									0	0.128498	2.58	15.86	10.37	50.12	0.05	0.4	11.98	0	0.03	7.15	0.11	0.04		3-D-plg	1.27	33.11	0.24	46.53	0.01	0.01	17.25	0.03
(a)	20VII-L12	3-E-MI1	segment 27	582	3.17	16.54	6.75	49.44	0.06	1.05	11.41	0.07	0.1	9.18	0.17		97.92									-0.15	0.120611	3.3695	14.2495	7.7355	49.824	0.0675	1.2075	10.6765	0.0805	0.112	10.4865	0.191	-0.003		3-E-MI1-plg	1.84	31.81	0.18	46.88	0.01		16.3
(a)	20VII-L12	3-E-MI2	segment 27	584	2.92	12.43	8.91	48.98	0.26	1.18	10.33	0.04	0.05	11.46	0.18	0.09	96.82									0.11	0.177987	2.8265	14.5354	7.9497	48.8183	0.2325	1.0535	10.935	0.0356	0.0456	10.2346	0.1701	0.0856		3-E-MI2-plg	2.07	31.57	0.18	47.51	0.01	0.03	15.83	0
(a)	20VII-L12	3-E-MI3	segment 27	586	2.31	12.17	8.43	49.18	0.11	0.74	10.48			11.34	0.23	0	94.98									0.11	0.218644	2.2836	14.304	7.5225	48.9963	0.099	0.6619	11.0685	0	0.0011	10.1278	0.2146	0.0055		3-E-MI2-plg	2.07	31.57	0.18	47.51	0.01	0.03	15.83	0
(a)	20VII-L12	3-F-MI1	segment 27	484	2.6	14.57	7.77	48.63	0.14	1.01	11.39	0.03	0.07	9.14	0.19		95.53									0	0.158765	2.6	14.57	7.77	48.63	0.14	1.01	11.39	0.03	0.07	9.14	0.19	0		3-F-MI1-plg	1.7	31.33	0.15	46.35	0.02		16.56
(a)	20VII-L12	3-G-M1	segment 27	587	3.23	14.17	7.99	49.23	0.09	1.35	10.37		0.1	10.55	0.19		97.34									0.01	0.124795	3.2157	14.3489	7.9117	49.2123	0.0892	1.3365	10.4277	0	0.0991	10.4484	0.1881	0.0004		3-G-MI1-plg	1.8	32.06	0.16	47.46	0.01		16.14	0
(a)	20VII-L12	3-G-MI2	segment 27	589	3.2	15.92	7.37	49.94	0.06	0.79	11.17	0.02	0.06	9.76	0.16	0.01	98.47									-0.05	0.140219	3.265	15.121	7.7305	50.0605	0.062	0.829	10.918	0.019	0.063	10.2255	0.1675	0.0085		3-G-MI2-plg	1.9	31.9	0.16	47.53	0.02	0.01	16.21	0.04
(a)	20VII-L12	3-G-MI3	segment 27	591	2.62	13.47	8.84	49.15	0.06	1.17	10.97		0.1	11.14	0.17	0.04	97.78									0.09	0.191908	2.5552	15.1287	8.0588	49.0042	0.0564	1.0656	11.4416	0.0036	0.091	10.1779	0.1556	0.04		3-G-MI2-plg	1.9	31.9	0.16	47.53	0.02	0.01	16.21	0.04
(a)	20VII-L12	3-G-MI4	segment 27	592	2.62	14.87	8.26	48.4	0.13	1.05	11.51	0.03	0.08	10.18	0.22		97.35									0.04	0.212244	2.594	15.5528	7.9372	48.388	0.1252	1.0088	11.6848	0.0288	0.078	9.7892	0.212	0.0024		3-G-MI4-plg	1.97	31.94	0.19	48.1	0.01	0.02	15.88
(a)	20VII-L12	4-A-MI1	segment 27	594	2.44	13.56	9.14	51.43	0.13	1.02	11.37		0.11	7.86	0.2	0	97.27									0.1	0.217482	2.396	15.436	8.246	51.108	0.117	0.919	11.863	0.001	0.1	7.111	0.18	0		4-A-MI1-plg	2	32.32	0.2	48.21	0	0.01	16.3	0.01
(a)	20VII-L12	4-A-MI2	segment 27	596	2.3	13.52	9.03	51.02	0.12	1.5	11.7	0.04	0.11	7.55	0.26		97.15									0.1	0.203595	2.243	15.457	8.146	50.659	0.109	1.356	12.202	0.038	0.099	6.835	0.237	0		4-A-MI2-plg	1.73	32.89	0.19	47.41	0.01	0.06	16.72	0.02
(a)	20VII-L12	4-B-MI1	segment 27	598	3.18	14.44	7.52	51.07	0.07	1.05	11.41		0.09	9.34	0.18	0.06	98.46									0.01	0.128303	3.1654	14.6168	7.4468	51.035	0.0695	1.0399	11.4607	0.0004	0.0895	9.2507	0.1785	0.06		4-B-MI1-plg	1.72	32.12	0.2	47.57	0.02	0.04	16.48	0.04
(a)	20VII-L12	4-B-MI2	segment 27	600	2.74	13.89	7.55	51.34	0.07	0.81	11.62		0.06	9.66	0.21	0.04	98.02									0.01	0.158142	2.7313	14.0694	7.4763	51.3041	0.0695	0.8019	11.6674	0.0003	0.0597	9.5674	0.208	0.0396		4-B-MI2-plg	1.87	31.83	0.18	47.75	0.02		16.36	0.03
(a)	20VII-L12	4-B-MI3	segment 27	602	2.84	14.04	7.38	50.78	0.08	0.95	11.85	0.03	0.04	9.08	0.18	0.07	97.37									0.01	0.15452	2.8297	14.2174	7.3084	50.7449	0.0795	0.9405	11.8947	0.0297	0.0398	8.9929	0.1782	0.0698		4-B-MI3-plg	1.81	31.78	0.22	47.27	0.03		16.32
(a)	20VII-L12	4-B-MI4	segment 27	604	2.85	14.18	7.74	50.88	0.07	1.04	11.89	0.01	0.1	9.28	0.18	0.13	98.38									0.02	0.158885	2.8292	14.532	7.5896	50.8078	0.0692	1.0192	11.9786	0.0098	0.0984	9.1018	0.1764	0.1284		4-B-MI3-plg	1.81	31.78	0.22	47.27	0.03		16.32
(a)	20VII-L12	4-B-MI5	segment 27	605	2.69	13.33	8.09	50.54	0.08	0.96	11.78		0.08	10.18	0.19	0.03	98									0.05	0.153487	2.637	14.2565	7.6965	50.364	0.0775	0.9125	12.0025	0	0.077	9.688	0.1855	0.0285		4-B-MI5-plg	1.63	31.86	0.22	47.02	0.03	0.01	16.23
(a)	20VII-L12	4-D-MI1	segment 27	482	3.23	13.83	7.58	50.58	0.07	0.9	11.09	0.03	0.12	10.89	0.19	0.06	98.71									0.03	0.14313	3.1919	14.3799	7.358	50.5086	0.0685	0.8736	11.246	0.0291	0.1164	10.5756	0.1849	0.0582		4-D-MI1-plg	1.96	32.16	0.18	48.2	0.02	0.02	16.29
(a)	20VII-L12	5-A-MI1	segment 27	641	2.56	16	8	48.96	0.12	0.55	12.21		0.06	8.24	0.21		97									-0.05	0.161518	2.607	15.1845	8.39	49.0515	0.126	0.576	11.9795	-0.0015	0.062	8.6385	0.2205	-0.0015		5-A-MI1-plg	1.62	32.31	0.2	47.13	0	0.03	16.82	0.03
(a)	20VII-L12	5-A-MI10	segment 27	678	2.63	12.89	9.63	50.25	0.08	0.41	12.09		0.01	9.33	0.16	0.05	97.65									0.16	0.190019	2.4684	15.9972	8.1212	49.7508	0.0672	0.3492	12.8468	0.0048	0.0116	7.8804	0.1344	0.0468		5-A-MI1-plg	1.62	32.31	0.2	47.13	0	0.03	16.82	0.03
(a)	20VII-L12	5-A-MI11	segment 27	679	2.72	13.41	9.39	49.69	0.06	0.54	12.34	0.05	0.05	9.75	0.17	0.02	98.35									0.13	0.183041	2.577	15.867	8.1953	49.3572	0.0522	0.4737	12.9224	0.0474	0.0461	8.5176	0.1479	0.0213		5-A-MI1-plg	1.62	32.31	0.2	47.13	0	0.03	16.82	0.03
(a)	20VII-L12	5-A-MI12	segment 27	680	2.26	13.14	9.49	50.39	0.09	0.59	12.06	0.05	0.02	10.17	0.08	0.06	98.5									0.13	0.206907	2.1768	15.6321	8.2823	49.9662	0.0783	0.5172	12.6788	0.0474	0.02	8.883	0.0696	0.0561		5-A-MI1-plg	1.62	32.31	0.2	47.13	0	0.03	16.82	0.03
(a)	20VII-L12	5-A-MI13	segment 27	681	2.43	12.62	9.38	50.21	0.07	0.48	12.11		0	9.46	0.21	0.05	97.19									0.13	0.189375	2.3247	15.1797	8.1866	49.8096	0.0609	0.4215	12.7223	0.0039	0.0026	8.2653	0.1827	0.0474		5-A-MI1-plg	1.62	32.31	0.2	47.13	0	0.03	16.82	0.03
(a)	20VII-L12	5-A-MI14	segment 27	682	2.23	13.16	9.29	50.24	0.17	0.52	12.13	0.03	0.01	10.05	0.16	0.04	98.18									0.13	0.21121	2.1507	15.6495	8.1083	49.8357	0.1479	0.4563	12.7397	0.03	0.0113	8.7786	0.1392	0.0387		5-A-MI1-plg	1.62	32.31	0.2	47.13	0	0.03	16.82	0.03
(a)	20VII-L12	5-A-MI2	segment 27	643	3.04	15.66	7.55	49.78	0.06	0.92	11.99	0.01	0.06	8.09	0.18	0.06	97.39									-0.05	0.127384	3.111	14.8275	7.9175	49.9125	0.063	0.9645	11.7485	0.009	0.062	8.481	0.189	0.0615		5-A-MI1-plg	1.62	32.31	0.2	47.13	0	0.03	16.82	0.03
(a)	20VII-L12	5-A-MI2	segment 27	670	2.59	13.07	9.11	50.14	0.06	0.54	12.21	0.02	0	9.64	0.17	0.02	97.68									0.1	0.173624	2.493	14.994	8.219	49.839	0.054	0.489	12.671	0.021	0.002	8.703	0.153	0.021		5-A-MI1-plg	1.62	32.31	0.2	47.13	0	0.03	16.82	0.03
(a)	20VII-L12	5-A-MI3	segment 27	671	2.36	13.06	9.32	50.24	0.06	0.51	12.13	0.02	0.01	9.38	0.21	0.05	97.53									0.13	0.199542	2.2638	15.5625	8.1344	49.8357	0.0522	0.4476	12.7397	0.0213	0.0113	8.1957	0.1827	0.0474		5-A-MI1-plg	1.62	32.31	0.2	47.13	0	0.03	16.82	0.03
(a)	20VII-L12	5-A-MI4	segment 27	672	2.27	13.2	9.33	50.63	0.08	0.4	12.16	0.04	0	9.83	0.23	0.1	98.34									0.13	0.207324	2.1855	15.6843	8.1431	50.175	0.0696	0.3519	12.7658	0.0387	0.0026	8.5872	0.2001	0.0909		5-A-MI1-plg	1.62	32.31	0.2	47.13	0	0.03	16.82	0.03
(a)	20VII-L12	5-A-MI5	segment 27	673	2.27	13.17	9.46	50.93	0.07	0.41	12.16		0.02	9.97	0.25	0.01	98.81									0.13	0.205908	2.1855	15.6582	8.2562	50.436	0.0609	0.3606	12.7658	0.0039	0.02	8.709	0.2175	0.0126		5-A-MI1-plg	1.62	32.31	0.2	47.13	0	0.03	16.82	0.03
(a)	20VII-L12	5-A-MI6	segment 27	674	2.06	13.25	9.66	50.55	0.18	0.51	12.15	0.11	0	9.72	0.19	0.1	98.6									0.13	0.227024	2.0028	15.7278	8.4302	50.1054	0.1566	0.4476	12.7571	0.0996	0.0026	8.4915	0.1653	0.0909		5-A-MI1-plg	1.62	32.31	0.2	47.13	0	0.03	16.82	0.03
(a)	20VII-L12	5-A-MI7	segment 27	675	2.3	12.06	10.42	49.65	0.12	0.63	11.85	0.01	0.08	10.04	0.21	0.03	97.5									0.2	0.220915	2.164	16.11	8.376	49.146	0.096	0.51	12.844	0.014	0.068	8.086	0.168	0.03		5-A-MI1-plg	1.62	32.31	0.2	47.13	0	0.03	16.82	0.03
(a)	20VII-L12	5-A-MI8	segment 27	676	2.21	13.04	9.83	50.95	0.07	0.4	11.99		0.02	9.61	0.15	0.06	98.47									0.15	0.215193	2.1215	15.9305	8.3855	50.377	0.0595	0.3445	12.7145	0.0045	0.02	8.209	0.1275	0.0555		5-A-MI1-plg	1.62	32.31	0.2	47.13	0	0.03	16.82	0.03
(a)	20VII-L12	5-A-MI9	segment 27	677	2.69	13.18	9.59	50.61	0.08	0.4	12.15	0	0.02	9.86	0.29	0.06	99.13									0.15	0.184836	2.5295	16.0495	8.1815	50.088	0.068	0.3445	12.8505	0.0045	0.02	8.4215	0.2465	0.0555		5-A-MI1-plg	1.62	32.31	0.2	47.13	0	0.03	16.82	0.03
(a)	20VII-L12	5-B-1-MI1	segment 27	455	2.28	14.05	9.55	50.89	0.15	0.86	11.56	0.05	0.08	9.61	0.18	0.03	99.39									0.12	0.237439	2.2308	16.264	8.4292	50.5588	0.1332	0.7616	12.1264	0.0524	0.0716	8.4976	0.1584	0.0264		5-B-1-MI1-plg	1.87	32.5	0.21	48.13	0.01	0.04	16.28	0.07
(a)	20VII-L12	5-B-1-MI1	segment 27	456	2.37	13.92	9.31	50.44	0.14	0.95	11.57		0.07	9.59	0.21	0.13	98.77									0.12	0.229649	2.31	16.1496	8.218	50.1628	0.1244	0.8408	12.1352	0.0084	0.0628	8.48	0.1848	0.1144		5-B-1-MI1-plg	1.87	32.5	0.21	48.13	0.01	0.04	16.28	0.07
(a)	20VII-L12	5-B-1-MI2	segment 27	458	2.29	13.83	9.18	50.17	0.06	0.83	11.54	0.04	0.06	9.66	0.05		97.77									0.12	0.230693	2.2372	16.0536	8.1	49.8964	0.054	0.7316	12.1388	0.0352	0.0564	8.538	0.044	0.0048		5-B-1-MI2-plg	1.85	32.36	0.18	47.89	0.01	0.01	16.53
(a)	20VII-L12	5-B-1-MI2	segment 27	460	2.66	13.58	9.48	50.5	0.07	0.7	11.56		0.03	9.38	0.19		98.22									0.12	0.197761	2.5628	15.8336	8.364	50.1868	0.0628	0.6172	12.1564	0	0.03	8.2916	0.1672	0.0048		5-B-1-MI2-plg	1.85	32.36	0.18	47.89	0.01	0.01	16.53
(a)	20VII-L12	5-B-1-MI3	segment 27	461	2.62	13.78	9.6	50.76	0.07	0.76	11.47	0.01	0.07	10.06	0.16		99.43									0.12	0.203639	2.5264	15.9856	8.472	50.4312	0.0616	0.67	12.0376	0.0088	0.0616	8.9056	0.1408	0.0048		5-B-1-MI3-plg	1.84	32.16	0.2	48.02		0.01	16.2
(a)	20VII-L12	5-B-2-MI1	segment 27	463	2.59	13.82	9.96	49.81	0.07	0.87	12.22	0.04	0.07	9.25	0.1	0.09	99.01									0.14	0.244317	2.5018	16.3456	8.595	49.6182	0.0616	0.751	12.7422	0.0386	0.0644	8.0026	0.086	0.0802		5-B-2-MI1-plg	1.96	31.86	0.21	48.44	0.01	0.02	15.95	0.03
(a)	20VII-L12	5-B-2-MI5	segment 27	464	2.13	15.41	9.11	50.16	0.09	0.89	12.3		0.03	8.64	0.21	0.04	99.1									0.08	0.258612	2.1036	16.7732	8.3996	49.9832	0.0836	0.8228	12.6424	0	0.03	7.9744	0.1972	0.0368		5-B-2-MI5-plg	1.8	32.45	0.23	47.95	0.01	0.05	16.58
(a)	20VII-L12	5-B-3-MI1	segment 27	476	2.17	11.66	12.16	50.57	0.03	0.3	12.23	0.03	0	9.34	0.11	0.12	98.84									0.22	0.259664	2.082	16.1986	9.5332	49.8792	0.0234	0.2362	13.1738	0.0234	0.0022	7.36	0.088	0.1002		5-B-3-MI5-plg	1.77	32.29	0.22	47.43	0	0.01	16.52
(a)	20VII-L12	5-B-3-MI2	segment 27	477	2.26	11.97	11.91	50.21	0.04	0.23	12.13	0.04		9.03	0.17	0.08	98.28									0.22	0.254869	2.1522	16.4404	9.3382	49.5984	0.0312	0.1816	13.0958	0.0312	0.0022	7.1182	0.1348	0.069		5-B-3-MI5-plg	1.77	32.29	0.22	47.43	0	0.01	16.52
(a)	20VII-L12	5-B-3-MI3	segment 27	478	2.18	12.1	11.87	50.27	0.03	0.34	12.02	0.02	0.03	9.09	0.19	0.02	98.29									0.22	0.262121	2.0898	16.5418	9.307	49.6452	0.0234	0.2674	13.01	0.0156	0.0256	7.165	0.1504	0.0222		5-B-3-MI5-plg	1.77	32.29	0.22	47.43	0	0.01	16.52
(a)	20VII-L12	5-B-3-MI4	segment 27	467	2.23	13.38	10.61	49.85	0.03	0.48	12.79		0.08	8.58	0.22		98.39									0.18	0.269078	2.1472	16.7838	8.7398	49.4144	0.0246	0.3954	13.4614	0	0.0674	7.0968	0.1822	0.0054		5-B-3-MI5-plg	1.77	32.29	0.22	47.43	0	0.01	16.52
(a)	20VII-L12	5-B-3-MI5	segment 27	468	2.24	13.07	10.7	50.03	0.03	0.44	12.7	0.03	0.05	8.66	0.2	0.06	98.32									0.18	0.261765	2.1554	16.5296	8.8136	49.562	0.0246	0.3626	13.3876	0.0246	0.0428	7.1624	0.1658	0.0546		5-B-3-MI5-plg	1.77	32.29	0.22	47.43	0	0.01	16.52
(a)	20VII-L12	5-B-3-MI6	segment 27	470	2.43	13.37	10.45	49.68	0.02	0.55	12.74		0.05	8.94	0.16	0.1	98.62									0.18	0.249806	2.3112	16.7756	8.6086	49.275	0.0164	0.4528	13.4204	0	0.0428	7.392	0.133	0.0874		5-B-3-MI5-plg	1.77	32.29	0.22	47.43	0	0.01	16.52
(a)	20VII-L12	5-B-3-MI7	segment 27	469	2.28	12.73	11.14	49.71	0.03	0.5	12.65		0.02	9	0.26	0.02	98.48									0.2	0.210631	2.1	16.726	8.962	49.09	0.024	0.406	13.53	0.008	0.016	7.278	0.216	0.02		5-B-3-MI7-plg	1.38	32.71	0.25	46.61		0.03	17.05	0.04
(a)	20VII-L12	5-B-3-MI8	segment 27	471	2.5	13.65	10.65	49.66	0.02	0.5	12.21		0.03	8.35	0.2	0.08	98.09									0.18	0.194504	2.3056	17.0592	8.7762	49.0948	0.0164	0.4118	13.0974	0.0018	0.0282	6.9046	0.164	0.071		5-B-3-MI8-plg	1.42	32.59	0.24	46.52	0	0.01	17.14	0.01
(a)	20VII-L12	5-B-3-MI9	segment 27	472	2.54	13.09	10.95	49.5	0.03	0.49	12.01	0.03	0.02	8.75	0.22	0.11	97.87									0.18	0.18477	2.3384	16.6	9.0222	48.9636	0.0246	0.4036	12.9334	0.0264	0.02	7.2326	0.1804	0.0956		5-B-3-MI8-plg	1.42	32.59	0.24	46.52	0	0.01	17.14	0.01
(a)	20VII-L12	5-E-MI1	segment 27	650	2.76	14.28	10.29	50.15	0.03	0.64	12.49		0.05	9.43	0.16	0.05	100.51									0.16	0.176251	2.544	17.3712	8.6724	49.75	0.0252	0.5424	13.2644	0	0.0436	7.9564	0.1376	0.0452		5-E-MI1-plg	1.41	33.6	0.18	47.65	0	0.03	17.33
(a)	20VII-L12	5-F-MI2	segment 27	652	2.99	13.3	9.25	48.92	0.04	0.94	11.59		0.07	10.18	0.16	0	97.51									0.14	0.183451	2.8262	15.8816	7.9844	48.6652	0.0344	0.8182	12.2998	0.0042	0.0602	8.8038	0.1376	0		5-F-MI2-plg	1.82	31.74	0.21	47.1	0	0.07	16.66	0.03
(a)	21VI-S14-TVG08	7-A-MI1	segment 27	687	1.98	16.28	9.99	48.96	0.09	0.62	11.97	0.03	0.05	7	0.23		97.26									-0.01	0.156146	1.9881	16.1076	10.0877	48.9839	0.0907	0.6262	11.915	0.0301	0.0505	7.0675	0.2323	0		7-A-MI1-plg	1.17	33.52	0.22	46.57	0.02		17.47	0.02
(a)	21VI-S14-TVG08	7-A-MI3	segment 27	688	2.13	16.74	10.31	49.34	0.11	0.71	11.52	0.01	0.03	6.98	0.09		97.99									-0.06	0.131303	2.1864	15.7458	10.9166	49.5524	0.116	0.7526	11.1702	0.0106	0.0312	7.3802	0.0954	0		7-A-MI3-plg	1.19	33.31	0.2	45.8	0.01		17.35
(a)	21VI-S14-TVG08	7-B-MI1	segment 27	691	1.81	16.16	10.82	48.83	0.09	0.68	11.98		0.1	7.78	0.13		98.38									-0.03	0.156805	1.8307	15.6365	11.1392	48.893	0.0924	0.7001	11.8174	-0.0006	0.1024	8.0014	0.1339	0		7-B-MI1-plg	1.12	33.61	0.18	46.73	0.01	0.01	17.4	0.02
(a)	21VI-S14-TVG08	7-B-MI6	segment 27	693	1.94	15.65	10.93	50.64	0.08	0.5	11.38	0.06	0	7.45	0.15	0.05	98.92									-0.01	0.134723	1.9482	15.4704	11.0375	50.6791	0.0807	0.5049	11.3198	0.0604	-0.0002	7.5205	0.1515	0.0505		7-B-MI1-plg	1.12	33.61	0.18	46.73	0.01	0.01	17.4	0.02
(a)	21VI-S14-TVG08	7-B-MI9	segment 27	694	2.77	16.59	9.6	50.59	0.08	0.36	11.99	0.05	0.01	7.44	0.14	0.04	99.72									-0.01	0.105519	2.7865	16.4198	9.6942	50.6286	0.0807	0.3635	11.9359	0.0503	0.0099	7.5104	0.1414	0.0404		7-B-MI1-plg	1.12	33.61	0.18	46.73	0.01	0.01	17.4	0.02
(a)	30I-SWIR-S004TVG02	PUB-1-MI1	Mountain Jourdanne	695	4.03	16.01	7	52.73	0.31	1.32	9.69	0.04	0.17	7.83	0.13	0.02	99.37	695								0.05	0.243636	4.0065	16.718	6.657	52.694	0.2965	1.256	9.8815	0.0385	0.1625	7.4545	0.1235	0.019		PUB-1-MI1-plg	3.56	30.17	0.14	52.01	0.04	0.04	13.52	0.01
(a)	30I-SWIR-S004TVG02	PUB-1-MI2	Mountain Jourdanne	696	3.94	15.91	6.9	52.72	0.29	1.34	9.81		0.16	7.89	0.17	0.11	99.28	696								0.05	0.257443	3.9245	16.6135	6.563	52.7085	0.279	1.275	9.987	0.002	0.1535	7.51	0.1615	0.109		PUB-1-MI2-plg	3.63	29.98	0.16	52.49	0.07	0.04	13.35	0.04
(a)	30I-SWIR-S004TVG02	PUB-1-MI3	Mountain Jourdanne	697	4.01	16.06	7.05	52.58	0.3	1.2	9.76	0.03	0.17	7.96	0.15	0.04	99.41	697								0.05	0.254753	3.991	16.756	6.7055	52.5755	0.2885	1.142	9.9395	0.0305	0.163	7.5765	0.1425	0.0425		PUB-1-MI2-plg	3.63	29.98	0.16	52.49	0.07	0.04	13.35	0.04
(a)	30I-SWIR-S004TVG02	PUB-1-MI4	Mountain Jourdanne	698	3.91	16	7.09	53.01	0.29	1.36	9.76	0.04	0.17	7.78	0.12		99.7	698								0.05	0.258072	3.896	16.699	6.7435	52.984	0.279	1.294	9.9395	0.04	0.163	7.4055	0.114	0.0045		PUB-1-MI2-plg	3.63	29.98	0.16	52.49	0.07	0.04	13.35	0.04
(a)	30I-SWIR-S004TVG02	PUB-2-MI1	Mountain Jourdanne	666	3.76	15.21	7.58	51.58	0.23	1.48	10.22	0.01	0.21	7.76	0.18	0.07	98.34	666								0.12	0.273479	3.7072	16.9404	6.6956	51.5656	0.2084	1.3096	10.6112	0.0088	0.1848	6.866	0.1596	0.0676		PUB-2-MI1-plg	3.32	29.63	0.21	51.46	0.05	0.06	13.48
(a)	30I-SWIR-S004TVG02	PUB-2-MI2	Mountain Jourdanne	667	3.76	15.39	7.43	51.87	0.25	1.21	10.03		0.15	7.39	0.19	0.1	97.78	667								0.11	0.278422	3.7237	16.9751	6.6336	51.837	0.228	1.0813	10.3897	0	0.1335	6.6156	0.1757	0.0912		PUB-2-MI2-plg	3.43	29.8	0.19	51.57	0.05	0.04	13.3
(b)	30I-TVG2-1	C1-1	Mountain Jourdanne	1-1MI1	4.03	16.01	7	52.73	0.31	1.32	9.69		0.17	7.83	0.13	0.02	99.21	1-1MI1								0.06	0.264441	4.01554	16.8571	6.5923	52.6854	0.29386	1.24896	9.9117	0	0.1613	7.37682	0.1222	0.02102		1-1PLG	3.789	30.128	0.205	51.986	0.041	0.136	13.385
(b)	30I-TVG2-1	C1-2	Mountain Jourdanne	1-2MI1	4.27	15.85	7.04	51.74	0.33	1.41	9.65		0.19	7.88	0.09	0.05	98.51	1-2MI1								0.06	0.251644	4.24114	16.7067	6.6299	51.7548	0.31266	1.33356	9.8741	0	0.1801	7.42382	0.0846	0.04922		1-1PLG	3.789	30.128	0.205	51.986	0.041	0.136	13.385
(b)	30I-TVG2-1	C1-2	Mountain Jourdanne	1-2MI2	3.94	15.91	6.9	52.72	0.29	1.34	9.81		0.16	7.89	0.17	0.11	99.23	1-2MI2								0.06	0.271731	3.93094	16.7631	6.4983	52.676	0.27506	1.26776	10.0245	0	0.1519	7.43322	0.1598	0.10562		1-1PLG	3.789	30.128	0.205	51.986	0.041	0.136	13.385
(b)	30I-TVG2-1	C1-3	Mountain Jourdanne	1-3MI1_1	3.65	15.26	7.8	52.06	0.36	1.16	9.72		0.19	7.89	0.15	0.07	98.3	1-3MI1_1								0.12	0.296076	3.65804	17.0542	6.88716	52.1106	0.321	1.03244	10.1759	0	0.16828	6.9738	0.132	0.0616		1-3PLG	3.717	30.212	0.193	52.482	0.035	0.097	13.519
(b)	30I-TVG2-1	C1-3	Mountain Jourdanne	1-3MI1_2	3.67	15.39	7.91	52.14	0.38	1.2	9.62		0.18	7.56	0.15	0.03	98.23	1-3MI1_2								0.12	0.293673	3.67564	17.1686	6.98396	52.181	0.3386	1.06764	10.0879	0	0.15948	6.6834	0.132	0.0264		1-3PLG	3.717	30.212	0.193	52.482	0.035	0.097	13.519
(b)	30I-TVG2-1	C1-3	Mountain Jourdanne	1-3MI2	3.64	15.61	7.83	52.6	0.35	1.27	9.85		0.21	7.28	0.13	0.01	98.79	1-3MI2								0.12	0.302786	3.64924	17.3622	6.91356	52.5858	0.3122	1.12924	10.2903	0	0.18588	6.437	0.1144	0.0088		1-3PLG	3.717	30.212	0.193	52.482	0.035	0.097	13.519
(b)	30I-TVG2-1	C1-4	Mountain Jourdanne	1-4MI1	4.01	16.06	7.05	52.58	0.3	1.2	9.76		0.17	7.96	0.15	0.04	99.27	1-4MI1								0.07	0.28703	4.003	17.0181	6.56735	52.5909	0.28236	1.12755	9.98743	0	0.1581	7.42191	0.1395	0.03979		1-4PLG	3.91	29.747	0.155	52.736	0.048	0.165	13.009
(b)	30I-TVG2-1	C1-4	Mountain Jourdanne	1-4MI2	3.91	16	7.09	53.01	0.29	1.36	9.76		0.17	7.78	0.12	0.04	99.49	1-4MI2								0.07	0.290683	3.91	16.9623	6.60455	52.9908	0.27306	1.27635	9.98743	0	0.1581	7.25451	0.1116	0.03979		1-4PLG	3.91	29.747	0.155	52.736	0.048	0.165	13.009
(b)	30I-TVG2-1	C1-6	Mountain Jourdanne	1-6MI1	4.08	15.65	7.45	52.49	0.33	1.24	9.61		0.16	7.59	0.14	0.05	98.78	1-6MI1								0.07	0.234846	4.03863	16.6834	6.93907	52.4277	0.31054	1.15726	9.89651	0	0.14922	7.07305	0.1302	0.0465		1-6PLG	3.489	30.413	0.151	51.6	0.052	0.058	13.703
(b)	30I-TVG2-1	C1-7	Mountain Jourdanne	1-7MI1	3.89	15.23	7.45	52.3	0.25	1.15	10.35		0.12	7.71	0.07	0.05	98.58	1-7MI1								0.1	0.270921	3.8533	16.7145	6.7225	52.2597	0.2289	1.0418	10.6783	0	0.112	6.9673	0.0665	0.045		1-7PLG	3.523	30.075	0.175	51.897	0.039	0.068	13.633
(b)	30I-TVG2-1	C1-7	Mountain Jourdanne	1-7MI2	4.05	15.67	7.25	51.71	0.28	1.19	10.22		0.16	7.68	0.08	0.14	98.33	1-7MI2								0.09	0.263691	4.00257	16.9665	6.61325	51.7268	0.25831	1.08902	10.5272	0	0.1492	7.01427	0.07595	0.1274		1-7PLG	3.523	30.075	0.175	51.897	0.039	0.068	13.633
(b)	30I-TVG2-1	C1-7	Mountain Jourdanne	1-7MI3	4.04	15.56	7.25	51.99	0.28	1.46	10.02		0.17	8.02	0.14	0.08	99.08	1-7MI3								0.09	0.256924	3.99347	16.8664	6.61325	51.9816	0.25831	1.33472	10.3452	0	0.1583	7.32367	0.13055	0.0728		1-7PLG	3.523	30.075	0.175	51.897	0.039	0.068	13.633
(b)	30I-TVG2-1	C1-7	Mountain Jourdanne	1-7MI4	3.97	15.56	7.49	51.8	0.26	1.5	10.22		0.17	8	0.14	0.05	99.19	1-7MI4								0.09	0.266569	3.92977	16.8664	6.83165	51.8087	0.24011	1.37112	10.5272	0	0.1583	7.30547	0.13055	0.0455		1-7PLG	3.523	30.075	0.175	51.897	0.039	0.068	13.633
(b)	30I-TVG2-1	C1-7	Mountain Jourdanne	1-7MI5	4.03	15.67	7.62	52.16	0.26	1.45	10.04		0.18	7.84	0.09	0.02	99.39	1-7MI5								0.09	0.258725	3.98437	16.9665	6.94995	52.1363	0.24011	1.32562	10.3634	0	0.1674	7.15987	0.08505	0.0182		1-7PLG	3.523	30.075	0.175	51.897	0.039	0.068	13.633
(b)	30I-TVG2-1	C1-8	Mountain Jourdanne	1-8MI1	4.33	15.33	7.48	53.29	0.41	1.05	9.22		0.1	7.02	0.15		98.41	1-8MI1								0.09	0.250803	4.2958	16.6272	6.82327	53.2671	0.3776	0.96072	9.55417	0	0.09235	6.41637	0.1365	0		1-8PLG	3.95	29.743	0.183	53.035	0.05	0.058	12.933
(b)	30I-TVG2-2	C2-1	Mountain Jourdanne	2-1MI1	4.11	14.84	7.97	51.86	0.33	1.39	9.9		0.15	7.39	0.15	0.02	98.1	2-1MI1								0.15	0.303866	4.0878	17.0604	6.79895	52.0104	0.2889	1.1815	10.3332	0	0.1275	6.3319	0.12765	0.017		2-1PLG	3.962	29.643	0.163	52.863	0.056		12.788
(b)	30I-TVG2-2	C2-2	Mountain Jourdanne	2-1MI2	3.76	15.21	7.58	51.58	0.23	1.48	10.22		0.21	7.76	0.18	0.07	98.28	2-1MI2								0.12	0.333887	3.78424	16.942	6.68996	51.734	0.20912	1.3024	10.5282	0	0.1848	6.86912	0.15852	0.0616		2-1PLG	3.962	29.643	0.163	52.863	0.056		12.788
(b)	30I-TVG2-2	C2-2	Mountain Jourdanne	2-2MI1	3.76	15.39	7.43	51.87	0.25	1.21	10.03		0.15	7.39	0.19	0.1	97.76	2-2MI1								0.11	0.326643	3.78222	16.9578	6.63063	51.9792	0.22866	1.0769	10.3334	0	0.1335	6.61406	0.16921	0.089		2-1PLG	3.962	29.643	0.163	52.863	0.056		12.788
(b)	30I-TVG2-2	C2-4	Mountain Jourdanne	2-4MI	4	15.73	7.06	52.54	0.32	1.07	9.78		0.15	7.31	0.09	0.03	98.06	2-4MI								0.08	0.28099	3.98888	16.8709	6.51152	52.513	0.29784	0.9844	10.0501	0	0.1384	6.75048	0.08472	0.0276		2-4PLG	3.861	29.991	0.204	52.202	0.043		13.156
(b)	30I-TVG2-2	C2-6	Mountain Jourdanne	2-6MI1	4	16.11	7.37	52.49	0.31	1.09	10.22		0.15	6.94	0.14	0.1	98.92	2-6MI1								0.08	0.298627	3.98888	17.2205	6.79672	52.467	0.28864	1.0028	10.4549	0	0.1384	6.41008	0.13072	0.092		2-4PLG	3.861	29.991	0.204	52.202	0.043		13.156
(b)	30I-TVG2-2	C2-6	Mountain Jourdanne	2-6MI2	4.06	15.84	7.52	52.7	0.32	1.26	10.17		0.1	6.97	0.02	0.03	99	2-6MI2								0.08	0.287964	4.04408	16.9721	6.93472	52.6602	0.29784	1.1592	10.4089	0	0.0924	6.43768	0.02032	0.0276		2-4PLG	3.861	29.991	0.204	52.202	0.043		13.156
(b)	30I-TVG2-2	C2-7	Mountain Jourdanne	2-7MI1	3.87	15.28	7.42	52.47	0.27	1.35	10.13		0.16	7.46	0.14	0.05	98.6	2-7MI1								0.09	0.287225	3.8619	16.6068	6.77029	52.4552	0.24894	1.23552	10.4144	0	0.1474	6.81092	0.1274	0.0455		2-7PLG	3.78	30.022	0.201	52.305	0.036	0.078	13.29
(b)	30I-TVG2-2	C2-7	Mountain Jourdanne	2-7MI2	4.11	15.64	7.25	51.85	0.25	1.35	10.28		0.18	7.22	0.11	0.14	98.38	2-7MI2								0.09	0.283901	4.0803	16.9344	6.61559	51.891	0.23074	1.23552	10.5509	0	0.1656	6.59252	0.1001	0.1274		2-7PLG	3.78	30.022	0.201	52.305	0.036	0.078	13.29
(b)	30I-TVG2-2	C2-8	Mountain Jourdanne	2-8MI1	4.01	15.75	7.77	51.73	0.31	1.32	9.89		0.13	7.05	0.18	0.04	98.17	2-8MI1								0.09	0.244355	3.94772	17.0945	7.08672	51.706	0.28498	1.20381	10.2395	0	0.11893	6.44484	0.1638	0.0364		2-8PLG	3.318	30.689	0.178	51.463	0.032	0.029	13.773
(b)	30I-TVG2-2	C2-8	Mountain Jourdanne	2-8MI2	3.99	15.65	7.49	52.06	0.29	1.21	10.2		0.18	7.43	0.09	0.05	98.62	2-8MI2								0.09	0.249458	3.92952	17.0035	6.83192	52.0063	0.26678	1.10371	10.5216	0	0.16443	6.79064	0.0819	0.0455		2-8PLG	3.318	30.689	0.178	51.463	0.032	0.029	13.773
(b)	30I-TVG2-2	C2-8	Mountain Jourdanne	2-8MI3	4.14	15.84	7.53	52.64	0.32	1.08	10.01		0.14	7.23	0.12	0.02	99.08	2-8MI3								0.09	0.237126	4.06602	17.1764	6.86832	52.5341	0.29408	0.98541	10.3487	0	0.12803	6.60864	0.1092	0.0182		2-8PLG	3.318	30.689	0.178	51.463	0.032	0.029	13.773
(b)	30I-TVG2-2	C2-8	Mountain Jourdanne	2-8MI4	3.69	15.62	7.44	51.66	0.26	1.36	10.49		0.22	7.36	0.16	0.09	98.35	2-8MI4								0.09	0.276299	3.65652	16.9762	6.78642	51.6423	0.23948	1.24021	10.7855	0	0.20083	6.72694	0.1456	0.0819		2-8PLG	3.318	30.689	0.178	51.463	0.032	0.029	13.773
	(a) Li W (2017) Petrogeochemical characteristics of basalts from Southwest Indian Ridge: Implications for magmatic processes at ultra-slow spreading ridge. Institute of Geophysics & Geomatics, Doctor thesis.
	(b) Li W, Tao C, Zhang W, Liu J, Liang J, Liao S, Yang W (2019) Melt Inclusions in Plagioclase Macrocrysts at Mount Jourdanne, Southwest Indian Ridge (~64° E): Implications for an Enriched Mantle Source and Shallow Magmatic Processes. Minerals, 9: 493.
[truncated: 20 more columns]

## Sheet: sheet 2
	Major (wt.%), trace element (10-6), Sr-Nd-Pb isotopic compositions of MORBs from SWIR (Segment 27-28 and Mountain Jourdanne) (from this and previous studies)
	Data source	Zone	longitude（°E）	latitude（°S）	Deepth (m)	Rock type	Sample	SiO2	TiO2	Al2O3	Fe2O3t	FeOt	MnO	MgO	CaO	Na2O	K2O	P2O5	LOI	SUM	Mg#	Li	B	Sc	Ti	V	Cr	Mn	Co	Ni	Cu	Zn	Ga	As	Rb	Sr	Y	Zr	Nb	Mo	Cs	Ba	La	Ce	Pr	Nd	Sm	Eu	Gd
	Yu X et al., 2020 EPSL	Segment 27	50.4829	37.6591	1812	basalt (whole rock)	SW27-1	49.8548	1.35893	14.7913	11.7904		0.181533	7.83361	11.5336	2.31902	0.103587	0.108715	-0.315516	99.8755	56.8243			40.94		304.9	207.3		46.37	98.09	85.87	104.8	17.21		0.683	94.87	36.63	85.16	1.132		0.017	7.335	2.103	7.466	1.452	8.7	3.283	1.198	4.831
	Yu X et al., 2020 EPSL	Segment 27	50.4725	37.6605	1813	basalt (whole rock)	SW27-3	49.6484	1.3028	14.7892	11.9585		0.179096	7.83008	11.6086	2.41637	0.0962002	0.121785	0.108923	99.9511	56.4656			41.17		315.7	210.6		47.16	95.14	75.09	107.2	17.56		1.584	102.2	34.04	83.5	1.132		0.23	6.835	1.892	6.811	1.276	7.617	2.952	1.132	4.403
	Yu X et al., 2020 EPSL	Segment 27	50.4703	37.6582	1739	basalt (whole rock)	SW27-6	50.0088	1.36338	14.7731	11.641		0.179123	7.6982	11.2965	2.75612	0.239513	0.111568	-0.107162	100.067	56.7095			42.39		311.3	206.3		59.97	101.5	74.86	105	17.58		1.96	99.7	36.82	85.92	1.183		0.11	7.482	2.078	7.437	1.447	8.549	3.277	1.207	4.816
	Yang Y et al., 2014 CG	Segment 27	50.47	37.66	1776	basalt (whole rock)	DY115-19-3-11-2	47.8	0.82	16.9	10.9		0.14	8.78	11.4	2.62	0.13			99.49	61.4736						329			172	90							44.8					1.47	4.61	0.86	4.85	1.83	0.75	2.61
	Yang Y et al., 2014 CG	Segment 27	50.47	37.66	1776	basalt (whole rock)	DY115-20-4-7	47.5	0.85	17.1	10.7		0.15	8.9	11.6	2.43	0.07	0.06		99.36	62.2308						274			151	71							45.9					1.46	4.7	0.87	4.61	1.69	0.69	2.28
	Yang Y et al., 2014 CG	Segment 27	50.47	37.66	1776	basalt (whole rock)	DY115-19-3-12	47.8	0.84	16.2	11.1		0.14	9.68	11.2	2.48	0.14			99.58	63.3362						403			214	83							44.5					1.5	4.86	0.92	4.96	1.79	0.75	2.63
	Yang Y et al., 2014 CG	Segment 27	50.47	37.66	1776	basalt (whole rock)	DY115-19-3-10	48.3	0.91	16.7	10.3		0.13	7.87	11.9	2.61	0.2	0.01		98.93	60.2158						289			127	100							55.8					1.66	5.47	1.04	5.67	2.07	0.86	2.93
	Yang Y et al., 2014 CG	Segment 27	50.47	37.66	1776	basalt (whole rock)	DY115-19-3-8-1	49.8	1.35	14.9	12		0.17	7.77	11.1	2.65	0.08	0.06		99.88	56.1909						214			106	90							79.2					2.05	6.95	1.36	8.01	3.12	1.15	4.56
	Yang Y et al., 2014 CG	Segment 27	50.47	37.66	1776	basalt (whole rock)	DY115-19-3-9	49.8	1.37	14.8	12		0.18	7.71	11.2	2.55	0.09	0.06		99.76	56						216			102	86							76.4					2.12	7.4	1.39	8.2	3.17	1.18	4.66
	Yang Y et al., 2014 CG	Segment 27	50.47	37.66	1776	basalt (whole rock)	DY115-19-3-8-2	49.8	1.35	14.8	12		0.18	7.78	11.2	2.59	0.09	0.06		99.85	56.2226						210			105	81							78.4					2.21	8.34	1.54	8.63	3.32	1.2	4.85
	Yang Y et al., 2014 CG	Segment 27	50.47	37.68	1631	basalt (whole rock)	DY115-20-5-6	50.7	1.27	15.4	9.81		0.17	6.93	11.8	2.44	0.2	0.1		98.82	58.322						200			75	53							77.7					1.74	5.95	1.1	6.65	2.68	1.17	3.7
	YU, 2013	Segment 27	50.4671	37.6579	1739	basalt (whole rock)	TVG14	46.94	1.065	14.39	12.78		0.17	9.28	11.39	2.65	0.07	0.077	0.65	98.812	58.9895																17.7						1.51	4.71	0.814	4.72	1.5	0.711	2.16
	Yu X et al., 2020 EPSL	Segment 27	50.4642	37.6684	1676	basalt (whole rock)	SW27-4	49.3073	1.27405	17.1668	10.3424		0.159256	6.60553	12.2777	2.37849	0.212684	0.103773	-0.0879585	99.828	55.8532			35.34		252.5	199.1		43.06	68.12	61.96	102.1	17.42		1.645	133.3	31.6	87.61	1.589		0.042	11.08	2.414	8.056	1.48	8.553	3.009	1.11	4.261
	Yu X et al., 2020 EPSL	Segment 27	50.4627	37.6541	1732	basalt (whole rock)	SW27-5	47.8897	0.799813	16.147	10.4648		0.144679	9.57432	11.7671	2.22175	0.256755	0.0458491	0.388176	99.3118	64.4424			33.16		179.9	385.3		60.32	212.2	89.22	98.21	16.12		4.574	133.9	19.72	47.36	0.698		0.272	4.054	1.442	4.85	0.871	4.879	1.75	0.759	2.633
	Yang Y et al., 2014 CG	Segment 27	50.46	37.65	1729	basalt (whole rock)	DY115-19-3-14-2	47.9	0.87	15.6	11.2		0.14	10.4	10.9	2.46	0.16			99.63	64.7814						494			275	93							45.9					1.52	4.73	0.9	4.98	1.88	0.79	2.75
	Yang Y et al., 2017 JGR	Segment 27	50.4713	37.6804	1640	basalt (whole rock)	21VI-14-8	50.234	1.39214	15.0369	11.0703		0.175497	7.44466	11.2348	2.60102	0.164546	0.0927342	0.0542741	99.5008	57.1209			43.83		322.8	213			89.72	82.51				1.538	104.5	29.52	83.54	1.007			7.314	1.783	6.218	1.213	7.025	2.85	1.125	4.184
	Yang Y et al., 2017 JGR	Segment 27	50.4678	37.6792	1719	basalt (whole rock)	21VI-11-7	50.2585	1.40018	14.9991	10.9878		0.176004	7.55622	11.2066	2.55139	0.216342	0.0944652	0.053376	99.4999	57.6675			41.76		314.3	211.9			91.69	76.39				1.99	105.8	29.9	83.25	1.013			6.794	1.8	6.383	1.251	7.322	2.959	1.154	4.31
	Yang Y et al., 2017 JGR	Segment 27	50.4678	37.6792	1631	basalt (whole rock)	SW-V-6	50.1498	1.34135	14.8555	10.9499		0.168274	7.49275	11.4689	2.59027	0.213184	0.0916944	0.176332	99.498	57.5457			43.66		326.3	205			87.44	71.8				1.47	107.5	30.04	84.28	1.015			7.758	1.739	6.143	1.202	7.068	2.847	1.085	4.252
	Yang Y et al., 2017 JGR	Segment 27	50.4703	37.6583	1751	basalt (whole rock)	SW-III-8-1	49.7767	1.35396	14.8875	11.9542		0.166276	7.76677	11.1134	2.64804	0.0781892	0.0568076	-0.271186	99.5307	56.2748			41.89		312.2	214.1			105.7	89.76				0.686	83.69	32.11	79.18	1.004			6.797	2.052	6.95	1.364	8.014	3.124	1.154	4.561
	Yang Y et al., 2017 JGR	Segment 27	50.4703	37.6583	1751	basalt (whole rock)	SW-III-8-2	49.7503	1.34554	14.8211	11.9639		0.175334	7.78088	11.1927	2.58664	0.0886521	0.0591702	-0.240072	99.5241	56.2995			38.81		295.9	209.9			104.5	80.74				0.668	84.93	30.74	78.43	1.05			7.999	2.214	8.341	1.536	8.626	3.315	1.198	4.85
	Yang Y et al., 2017 JGR	Segment 27	50.4703	37.6583	1751	basalt (whole rock)	SW-Ⅲ-9	49.7667	1.36872	14.8081	12.0119		0.177244	7.71073	11.2315	2.55077	0.0886219	0.0591338	-0.252578	99.5208	55.9779			40.86		313.5	215.6			102.2	85.54				0.646	83.82	33.1	76.37	0.977			7.097	2.116	7.403	1.385	8.197	3.168	1.18	4.661
	Yang Y et al., 2017 JGR	Segment 27	50.4703	37.6583	1764	basalt (whole rock)	20V-11-3	50.2241	1.33493	14.8714	10.9021		0.170486	7.76111	11.4015	2.60193	0.220034	0.0962742	-0.0844753	99.4992	58.5095			41.08		306.1	207.5			91.47	49.24				1.504	104.8	30.16	84.09	1.026			7.167	1.811	6.428	1.268	7.331	3.009	1.131	4.351
	Yang Y et al., 2017 JGR	Segment 27	50.4703	37.6583	1751	basalt (whole rock)	SW-Ⅲ-11-1	47.7547	0.821805	16.7096	10.9056		0.140429	9.10934	11.2867	2.86474	0.109772	0.0586371	-0.24049	99.5208	62.33			32.59		184.1	351.1			173.6	84.17				1.127	114.2	17.56	43.51	0.6			4.356	1.422	4.735	0.866	4.74	1.751	0.732	2.427
	Yang Y et al., 2017 JGR	Segment 27	50.4703	37.6583	1751	basalt (whole rock)	SW-Ⅲ-11-2	47.776	0.819585	16.8686	10.8858		0.136926	8.77782	11.4155	2.61525	0.132		0.0702741	99.4978	61.4985			33.15		185.3	328.9			171.8	90.15				2.43	121.2	18.04	44.79	0.639			4.248	1.473	4.614	0.863	4.851	1.831	0.748	2.61
	Yang Y et al., 2017 JGR	Segment 27	50.4704	37.659	1776	basalt (whole rock)	SW-Ⅲ-12	47.8418	0.84464	16.2056	11.1109		0.138628	9.68046	11.2073	2.47862	0.143579	0.0031907	-0.150231	99.5045	63.3145			30.9		175.4	402.8			213.9	82.87				2.079	108.4	17.07	44.54	0.611			3.344	1.495	4.864	0.919	4.955	1.793	0.753	2.628
	Yang Y et al., 2017 JGR	Segment 27	50.467	37.6572	1725	basalt (whole rock)	SW-IV-7	47.5483	0.845492	17.0697	10.7289		0.145494	8.89649	11.6171	2.42585	0.0681684	0.0569766	0.00759821	99.4101	62.1582			32.45		193.8	273.8			150.8	70.91				0.528	188.2	16.7	45.86	0.581			4.96	1.464	4.704	0.872	4.605	1.686	0.691	2.283
	Yang Y et al., 2017 JGR	Segment 27	50.467	37.6572	1725	basalt (whole rock)	SW-Ⅲ-22	47.6915	0.800638	17.4124	10.7864		0.134443	8.34181	11.7125	2.71976	0.082271	0.0126019	-0.200471	99.4939	60.5047			32.01		178.5	288.5			157.6	88.83				1.093	120.2	16.86	43.22	0.71			3.21	1.361	4.422	0.871	4.691	1.686	0.756	2.444
	Yang Y et al., 2017 JGR	Segment 27	50.4627	37.6542	1729	basalt (whole rock)	SW-Ⅲ-14-1	48.2943	0.920012	16.5578	11.2025		0.145162	7.88689	11.5639	2.64909	0.196165	0.00365898	0.0783453	99.4978	58.2395			34.33		202.8	298.9			129.8	97.13				3.256	114.6	19.45	47.68	0.666			4.242	1.628	5.057	1.106	5.394	1.985	0.838	2.878
	Yang Y et al., 2017 JGR	Segment 27	50.4627	37.6542	1729	basalt (whole rock)	SW-Ⅲ-14-2	47.9473	0.87038	15.6245	11.1581		0.138627	10.4002	10.8862	2.4588	0.157441		-0.120614	99.5209	64.8673			32.15		190.5	493.5			274.6	93.36				2.599	110.2	18.23	45.85	0.679			5.802	1.522	4.732	0.904	4.982	1.875	0.79	2.751
	Yang Y et al., 2017 JGR	Segment 27	50.4627	37.6542	1729	basalt (whole rock)	SW-III-15	48.5619	0.927397	16.4918	10.9858		0.13787	8.14372	11.4069	2.62266	0.22813		-0.0106462	99.4955	59.4885			33.88		203.2	333.4			158.2	101.7				4.192	113.8	19.62	47.88	0.713			4.02	1.617	5.016	0.947	5.211	1.968	0.83	2.885
	Yang Y et al., 2013Litho	Segment 27	50.97	37.61	1889	basalt (whole rock)	SW-III-18	49.32	1.28	14.55	12.25		0.17	8.21	11.18	2.45	0.1	0.05		99.53	57.0374																						1.79	6.24	1.26	7.54	2.98	1.11	4.5
	Yang Y et al., 2013Litho	Segment 27	50.99	37.61	1939	basalt (whole rock)	SW-III-20	48.98	1.37	14.46	12.28		0.17	8.4	11.04	2.49	0.25	0.06		99.53	57.5374																						2.15	7.2	1.43	8.4	3.38	1.23	4.81
	Yang Y et al., 2013Litho	Segment 27	51.72	37.47	1316	basalt (whole rock)	SW-III-21	49.35	1.19	14.87	11.37		0.16	8.87	11.12	2.46	0.15	0.04		99.51	60.7126																						1.84	6.22	1.24	7.08	2.82	1.06	4.12
	Yang Y et al., 2013Litho	Segment 27	50.46	37.65	1729	basalt (whole rock)	SW-III-14-1	48.29	0.92	16.56	11.2		0.15	7.89	11.56	2.65	0.2	0		99.5	58.2546																						1.63	5.06	1.11	5.39	1.99	0.838	2.88
	Yang Y et al., 2013Litho	Segment 27	50.46	37.65	1729	basalt (whole rock)	SW-III-14-2	47.95	0.87	15.62	11.16		0.14	10.4	10.89	2.46	0.16	0		99.52	64.8629																						1.52	4.73	0.904	4.98	1.88	0.79	2.75
	Yang Y et al., 2013Litho	Segment 27	50.47	37.66	1776	basalt (whole rock)	SW-III-12	47.84	0.84	16.21	11.11		0.14	9.68	11.21	2.48	0.14	0		99.5	63.3153																						1.5	4.86	0.919	4.96	1.79	0.753	2.63
	Yang Y et al., 2013Litho	Segment 27	55.71	34.28	2900	basalt (whole rock)	SW-V-1	47.4	1.7	14.23	11.31		0.17	9.91	10.74	2.71	0.26	0.13		99.43	63.4462																						3.45	10.9	2.01	11.5	3.73	1.26	4.3
	SWIR DR2-3	Segment 27	50.52	37.69	1648	basalt (whole rock)	SWIR DR2-3
	Le Voyer M et al., 2019 G3	Segment 28	49.882	37.71	3260	basalt (whole rock)	MD34D3	50.48	1.17146	14.6029	10.9682	9.86929	0.176964	8.36138	12.095	2.31533	0.0574681	0.115454		99.2452	60.161			31.0112		302.324	296.393		43.9483	131.439	106.253	91.9205			0.656868	73.2991	31.6531	72.6297	0.989807		0.0534262	6.29002	1.82654	6.61461	1.2088	6.86337	2.65906	0.993486	3.90486
	Le Voyer M et al., 2019 G3	Segment 28	49.85	37.69	2800	basalt (whole rock)	DUF0107-073
	Le Voyer M et al., 2019 G3	Segment 28	49.882	37.71	3260	basalt (whole rock)	DUF0034-003	50.4844	1.28812	14.8564	10.9912	9.89	0.13	9.17	11.5993	2.01387	0.06	0.128		99.6201	62.3022	8.35		38.1		319	333		46.9	131.8	115.5	76.6	16.96		0.61	68.82	33.556	73.207	1.295		0.00667	6.739	1.805	6.279	1.176	6.972	2.74	1.038	3.92832
	Le Voyer M et al., 2019 G3	Segment 28	49.882	37.71	3260	basalt (whole rock)	MD34-D3	50.48	1.17146	14.6029	10.9682	9.86929	0.176964	8.36138	12.095	2.31533	0.0574681	0.115454		99.2452	60.161			31.0112		302.324	296.393		43.9483	131.439	106.253	91.9205			0.656868	73.2991	31.6531	72.6297	0.989807		0.0534262	6.29002	1.82654	6.61461	1.2088	6.86337	2.65906	0.993486	3.90486
	Ou-Q-2021-	Segment 28	49.7819	37.8643		bsaalt (glass)	30-TVG3-3	49.3	1.575	15.92	10.8356	9.75	0.205	6.65	11.58	2.71	0.34	0.195	0.498213	98.225	54.8678	8.36		43.2	9410	331	263	1640	49.8	127	91.9	105	17.5		1.29	93.1	42.5	97.5	1.91	0.511	0.0852	11.2	3.11	9.92	1.75	10	3.79	1.33	4.98
	Ou-Q-2021-	Segment 28	49.6385	37.7819		bsaalt (glass)	30-TVG10	50.825	1.27	15.945	9.91874	8.925	0.2	7.33	11.65	2.74	0.345	0.14	0.330516	99.37	59.4138	5.92		42.2	8280	311	348	1450	46.4	145	101	84.9	16.5		0.736	88.1	38.5	86.3	1.23	0.261	0.0157	6.37	2.08	7.35	1.44	8.54	3.37	1.21	4.45
	Ou-Q-2021-	Segment 28	49.6561	37.7889		bsaalt (glass)	Dy115-D13	50.03	0.965	18.17	8.32007	7.4865	0.17	6.84	12.435	2.475	0.285	0.1	0.317116	98.9565	61.9557	6.11		42	8220	291	353	1450	46	152	88.6	83	16.3		0.838	102	37.9	93.3	1.41	0.262	0.016	6.91	2.41	8.27	1.56	8.96	3.43	1.22	4.43
	Yu X et al., 2020 EPSL	Segment 28	49.6872	37.7386	2946	basalt (whole rock)	SW28-6	48.6373	0.493198	16.7421	8.06241		0.125094	10.4597	13.8751	1.14844	0.0410144	0.0328115	0.22287	99.6171	71.988			32.88		200.4	404.2		51.23	208.9	103.5	78.45	13.16		0.226	46.04	16.49	18.38	0.233		0.007	2.099	0.388	1.468	0.316	2.124	1.049	0.456	1.837
	Yang Y et al., 2014 CG	Segment 28	49.64	37.77	2941	basalt (whole rock)	DY115-17-3	48.9	1.42	14.6	13.1		0.23	8.59	10.8	2.57	0.09	0.12		100.42	56.5014						360			158	100							90.5					2.72	8.62	1.69	9.54	3.44	1.23	5.01
	Yang Y et al., 2014 CG	Segment 28	49.64	37.77	2941	basalt (whole rock)	DY115-17-4	49.3	1.42	14.6	12.4		0.19	8.58	10.9	2.57	0.11	0.12		100.19	57.8175						360			167	100							95					2.57	8.63	1.71	9.74	3.53	1.23	5.01
	Yang Y et al., 2014 CG	Segment 28	49.64	37.77	2941	basalt (whole rock)	DY115-17-5	49.1	1.42	14.6	12.9		0.23	8.61	10.8	2.58	0.09	0.12		100.45	56.9362						377			167	105							92.8					2.74	8.86	1.78	9.86	3.62	1.26	5.05
	Yang Y et al., 2013Litho	Segment 28	49.65	37.77	2875	basalt (whole rock)	DY115-17-2A	49.13	1.4	14.59	11.62		0.19	8.53	10.92	3.21	0.16	0.12		99.87	59.2525																						2.59	8.68	1.69	9.31	3.46	1.21	4.87
	YU, 2013	Segment 28	49.6481	37.7791	2780	basalt (whole rock)	TVG16	46.75	1.846	11.48	16.09		0.28	8.32	11.04	2.92	0.1	0.11	0.52	98.936	50.6003																40						2.73	8.77	1.69	10.4	3.52	1.3	4.53
	Yu X et al., 2020 EPSL	Segment 28	49.6385	37.7819	2936	basalt (whole rock)	SW28-14	49.4326	1.32079	14.4619	11.3883		0.175489	8.6862	11.552	2.32218	0.113914	0.109809	-0.193237	99.5632	60.1735			41.14		299.1	315.1		48.44	142	91.04	96.46	17.27		0.635	88.62	37.48	85.3	1.085		0.018	6.51	1.911	7.003	1.396	8.447	3.244	1.144	4.832
	YU, 2013	Segment 28	49.6584	37.7829	2850	basalt (whole rock)	D13A	48.91	1.552	12.37	13.1		0.22	8.88	11.67	2.65	0.08	0.089	0.1	99.521	57.3156																34.6						2.31	7.66	1.45	8.85	3.11	1.21	4.11
	YU, 2013	Segment 28	49.6584	37.7829	2850	basalt (whole rock)	D13B	49.38	1.463	13.52	12.24		0.2	7.93	11.75	2.78	0.08	0.087	0.1	99.43	56.2052																35.7						2.47	8.12	1.52	9.03	3.34	1.18	4.2
	Yu X et al., 2020 EPSL	Segment 28	49.6504	37.7832	2800	basalt (whole rock)	SW28-13	49.9273	1.33197	14.376	11.7398		0.187196	8.64699	11.2809	2.42413	0.189253	0.118283	-0.15183	100.222	59.3336			40.16		283.4	337.7		47.06	155.3	71.65	101.5	17.04		1.063	96.43	37.56	96.04	1.457		0.037	8.292	2.347	8.269	1.575	9.238	3.397	1.204	4.961
	YU, 2013	Segment 28	49.6527	37.7835	2824	basalt (whole rock)	TVG6	48.52	1.705	12.4	13.76		0.24	8.73	11.27	2.68	0.09	0.1	0.1	99.495	55.689																38.3						2.81	9.2	1.55	9.85	3.31	1.36	4.54
	Yu X et al., 2020 EPSL	Segment 28	49.7988	37.8033	1916	basalt (whole rock)	SW28-1	49.6505	1.13265	17.4927	10.0426		0.16356	5.42098	12.9738	2.03066	0.316897	0.107336	0.37831	99.3317	51.6742			37.34		283.3	242		43.02	56.11	69.48	95.79	17.3		5.615	94.04	33.73	71.84	1.17		0.308	8.993	2.174	6.793	1.3	7.687	2.894	1.062	4.392
	Yu X et al., 2020 EPSL	Segment 28	49.7736	37.8246	1705	basalt (whole rock)	SW28-4	49.7329	1.42667	14.5716	11.901		0.18477	7.33224	11.325	2.10998	0.427091	0.117122	0.281667	99.1283	54.9638			42.59		320.3	254.3		46.77	110.3	82.43	104.6	17.55		7.312	91.14	39.61	91.14	1.297		0.43	9.032	2.246	7.972	1.541	9.205	3.505	1.251	5.152
	Yu X et al., 2020 EPSL	Segment 28	49.6613	37.8322	2165	basalt (whole rock)	SW28-7	48.6597	1.17769	15.0386	10.6003		0.149356	8.5355	9.06729	3.58899	0.0807331	0.0837606	2.50813	96.9819	61.4651			38.73		257.4	388		49.46	181.8	376.3	90.21	16.48		0.508	98.97	30.24	69.19	0.982		0.064	4.689	1.721	5.942	1.23	7.307	2.717	1	4.047
	Yu X et al., 2020 EPSL	Segment 28	49.7819	37.8463	1540	basalt (whole rock)	SW28-2	49.9179	1.49488	14.0727	12.7207		0.174607	6.95771	11.1248	2.14177	0.464596	0.115383	0.29496	99.185	52.0031			42.72		309.3	226.3		43.48	103.2	76.06	162.3	17.75		7.646	86.71	41.2	90.27	1.603		0.477	10.17	2.457	8.306	1.624	9.676	3.623	1.302	5.35
	Yu X et al., 2020 EPSL	Segment 28	49.7755	37.8489	1631	basalt (whole rock)	SW28-3	50.7161	1.58929	15.2789	11.6234		0.159645	5.40747	11.8171	2.43869	0.29166	0.118711	0.569097	99.4409	47.9589			47.5		362.3	254.4		45.04	89.55	85.43	123.2	20.17		3.805	98.91	46.15	104.1	1.833		0.191	12.03	2.811	9.616	1.836	10.98	4.072	1.455	6.062
	Yu X et al., 2020 EPSL	Segment 28	49.7125	37.8512	1634	basalt (whole rock)	SW28-5	49.2487	1.37631	14.9965	11.8797		0.177387	8.06692	11.4445	2.2441	0.154431	0.103302	0.0782473	99.6918	57.3585			41.46		304	269		54	128	80.83	106.7	17.65		1.622	99.39	37.27	87.17	1.447		0.054	12.15	2.207	7.569	1.44	8.637	3.284	1.192	4.808
	Yu X et al., 2020 EPSL	Segment 28	49.6537	37.8768	2216	basalt (whole rock)	SW28-11	48.8915	1.3602	14.8234	11.6		0.158379	7.52041	11.2967	2.464	0.101445	0.104551	1.35935	98.3207	56.2218			43.26		301.6	255.2		45.57	134.5	89.3	97.1	18.45		0.636	82.8	36.93	82.17	1.374		0.075	4.835	2.231	7.524	1.442	8.575	3.251	1.18	4.847
	Yang Y et al., 2017 JGR	Segment 28	49.6527	37.7835	2824	basalt (whole rock)	21V-29-6	49.7484	1.34064	14.4399	11.1242		0.172452	8.58852	11.0279	2.59935	0.145883	0.120315	0.193086	99.5006	60.4645			39.81		286.5	342.6			143.5	78.12				1.095	103.1	34.01	94.65	1.244			8.133	2.296	7.995	1.54	8.713	3.396	1.208	4.834
	Yang Y et al., 2017 JGR	Segment 28	49.652	37.7822	2831	basalt (whole rock)	SW-Ⅲ-5	49.6922	1.40106	14.4454	11.869		0.164017	8.4731	10.9304	2.59648	0.108686	0.0719298	-0.218516	99.5338	58.5773			41.23		302.5	358.4			157.3	88.56				0.938	85.51	36.13	91.85	1.303			7.964	2.495	8.455	1.686	9.36	3.638	1.241	5.093
	Yang Y et al., 2017 JGR	Segment 28	49.652	37.7822	2831	basalt (whole rock)	SW-Ⅲ-6	49.6091	1.39446	14.4254	11.8706		0.163413	8.42885	10.9541	2.72016	0.127759	0.0722114	-0.221755	99.5443	58.4468			37.29		277.5	338.3			149.7	84.64				0.877	81.44	33.15	92.38	1.271			7.195	2.426	8.445	1.711	9.614	3.691	1.262	5.186
	Yang Y et al., 2017 JGR	Segment 28	49.6502	37.7832	3000	basalt (whole rock)	SW-Ⅲ-1	49.4595	1.45035	14.1968	12.3591		0.176822	8.54161	11.3381	2.28948	0.11243	0.126739	-0.271831	99.7791	57.7887			40.78		295.9	333			155.1	88.69				0.924	83.9	35.9	90.83	1.274			7.42	2.455	8.421	1.654	9.233	3.515	1.218	5.012
	Yang Y et al., 2017 JGR	Segment 28	49.6502	37.7832	3000	basalt (whole rock)	SW-Ⅲ-2	49.4952	1.45428	14.1756	12.4159		0.173814	8.54056	11.3401	2.49923	0.0853645	0.127533	-0.520578	99.7871	57.6739			39.85		289.8	353.6			152.2	88.02				0.836	84.22	35.43	90.67	1.296			7.044	2.4	8.153	1.628	9.282	3.463	1.217	5.005
	Yang Y et al., 2017 JGR	Segment 28	49.65	37.7836	2752	basalt (whole rock)	SW-8-A	49.06	1.43	14.56	12.31		0.23	8.55	10.85	2.65	0.13	0.12	-0.19	99.7	57.9098			41.73		304.5	351.3			164.8	98.01				1.027	88.4	34.78	93.84	1.337			9.592	2.954	9.455	1.811	10.04	3.698	1.253	5.229
	Yang Y et al., 2017 JGR	Segment 28	49.65	37.7836	2752	basalt (whole rock)	SW-8-B	49.07	1.43	14.52	12.52		0.21	8.51	10.85	2.6	0.14	0.12	-0.25	99.72	57.3823			42.17		304.9	381.1			166.1	100.2				1.02	86.33	35.16	93.57	1.275			8.388	2.668	8.729	1.72	9.762	3.598	1.269	5.18
	Yang Y et al., 2017 JGR	Segment 28	49.65	37.7836	2752	basalt (whole rock)	SW-8-C	49.02	1.42	14.52	12.45		0.26	8.51	10.86	2.6	0.14	0.12	-0.2	99.7	57.5193			43.62		317.7	370.4			172.5	98.83				0.975	91.9	36.21	95.88	1.393			10.73	3.231	9.974	1.866	10.27	3.716	1.295	5.296
	Yang Y et al., 2017 JGR	Segment 28	49.65	37.7836	2752	basalt (whole rock)	SW-9-A	49.13	1.42	14.6	12.81		0.22	8.6	10.83	2.62	0.09	0.12	-0.74	99.7	57.0793			42.17		305	383.9			166.9	105.7				0.836	86.7	34.92	94.21	1.285			8.607	2.653	8.849	1.715	9.639	3.499	1.237	5.025
	Yang Y et al., 2017 JGR	Segment 28	49.65	37.7836	2752	basalt (whole rock)	SW-9-B	48.86	1.42	14.52	12.36		0.27	8.52	10.9	2.78	0.15	0.12	-0.19	99.71	57.7252			43.51		315.1	377.1			173.1	101.7				1.27	94.36	35.45	95.41	1.393			11.18	3.385	10.13	1.9	10.33	3.642	1.257	5.193
	Yang Y et al., 2017 JGR	Segment 28	49.65	37.7836	2752	basalt (whole rock)	SW-9-C	48.58	1.41	14.44	12.34		0.2	8.42	10.75	3.62	0.14	0.12	-0.32	99.7	57.4764			41.85		301	367			160.9	99.77				0.986	85.55	34.13	93.07	1.285			8.43	2.595	8.714	1.73	9.64	3.483	1.227	5.05
	Yang Y et al., 2017 JGR	Segment 28	49.65	37.7836	2752	basalt (whole rock)	SW-Ⅱ-1	49.4355	1.42713	14.6541	11.9382		0.19493	8.71832	10.9817	2.60883	0.09292	0.12019	-0.333363	99.8384	59.1274			40.04		293	343.6			156.6	93.65				0.955	83.5	33.53	90	1.268			8.032	2.508	8.479	1.646	9.279	3.466	1.179	4.915
	Yang Y et al., 2017 JGR	Segment 28	49.6492	37.7833	2784	basalt (whole rock)	21V-3-1	50.0883	1.3891	14.5773	11.1926		0.177724	8.68265	10.8243	2.52686	0.112719	0.120137	-0.190366	99.5013	60.5783			40.7		291.3	340			150.6	83.44				0.965	102.1	33.86	94.03	1.265			7.966	2.405	8.275	1.584	9.106	3.413	1.214	5.064
	Yang Y et al., 2017 JGR	Segment 28	49.6484	37.7831	2805	basalt (whole rock)	SW-Ⅲ-3	49.4203	1.3689	14.4429	11.6856		0.164856	8.48035	10.8935	3.2077	0.12168	0.0673125	-0.271831	99.5814	58.9752			41.35		296.7	362.8			157.3	87.85				0.787	83.44	35.27	91.07	1.281			7.136	2.482	8.149	1.634	9.398	3.374	1.223	5.035
	Yang Y et al., 2017 JGR	Segment 28	49.6484	37.7831	2805	basalt (whole rock)	SW-Ⅲ-4-1	49.8563	1.38349	14.5763	11.8179		0.166495	8.4861	10.9523	2.62496	0.122889	0.0703728	-0.520578	99.5366	58.719			40.55		300.3	365.2			157.2	89.25				0.956	84.72	35.43	91.67	1.266			7.312	2.541	8.405	1.644	9.327	3.612	1.256	5.162
	Yang Y et al., 2017 JGR	Segment 28	49.6484	37.7831	2805	basalt (whole rock)	SW-Ⅲ-4-2	49.701	1.39972	14.4996	11.7857		0.180198	8.71049	11.0977	2.34349	0.10193	0.124683	-0.280565	99.6639	59.4161			40.73		297.3	366.3			158.1	88.21				1.019	85.47	35.42	90.6	1.313			7.204	2.443	8.418	1.652	9.233	3.503	1.251	5.064
	Yang Y et al., 2017 JGR	Segment 28	49.6482	37.784	2825	basalt (whole rock)	20IV-7-1	50.1316	1.39888	14.62	11.1997		0.180962	8.72319	10.8567	2.55135	0.117308	0.122975	-0.400372	99.5023	60.6745			39.49		282.4	347			148.1	81.13				0.868	102.4	34.51	94.1	1.288			8.313	2.363	8.187	1.549	8.929	3.422	1.193	4.938
	Yang Y et al., 2017 JGR	Segment 28	49.6482	37.784	2825	basalt (whole rock)	SW-Ⅲ-7	49.7215	1.392	14.4633	11.9072		0.165856	8.50259	10.9582	2.65148	0.0770044	0.0727862	-0.371908	99.54	58.5837			41.45		305.9	355.2			155.7	91.39				0.868	85.39	36.12	90.93	1.305			7.134	2.459	8.335	1.67	9.433	3.481	1.215	4.845
	Yang Y et al., 2017 JGR	Segment 28	49.6482	37.784	2825	basalt (whole rock)	SW-IV-2 g	49.7036	1.45955	14.4229	11.7897		0.172734	8.59172	10.9688	2.54588	0.0725687	0.127762	-0.492822	99.3624	59.0764			40.06		314.4	338.9			157.3	89.23				0.934	131.7	34.34	96.56	1.402			11.52	2.493	8.597	1.687	9.274	3.507	1.202	4.606
	Yang Y et al., 2017 JGR	Segment 28	49.6481	37.7802	2780	basalt (whole rock)	SW-Ⅲ-17	49.8361	1.45131	14.5092	12.0475		0.168253	8.10692	10.8881	2.6353	0.104297	0.0780974	-0.289251	99.5359	57.1361			42.07		317.1	325.9			141.9	96.49				1.214	84.37	38.44	96.44	1.377			7.863	2.64	8.873	1.74	9.83	3.764	1.313	5.519
	Yang Y et al., 2017 JGR	Segment 28	49.6469	37.7718	2875	basalt (whole rock)	IR-2	49.13	1.4	14.59	11.62		0.19	8.53	10.92	3.21	0.16	0.12	-0.15	99.72	59.2525			43.19		303.9	376.4			158.2	85.97				1.132	90.64	33.93	91.35	1.324			7.949	2.586	8.675	1.693	9.307	3.457	1.205	4.873
	Yang Y et al., 2017 JGR	Segment 28	49.6421	37.7715	2941	basalt (whole rock)	SW-3	48.94	1.42	14.55	13.06		0.23	8.59	10.83	2.57	0.09	0.12	-0.68	99.72	56.5766			37.01		279	359.9			158.1	100.4				0.822	84.08	32.95	90.46	1.244			8.777	2.724	8.616	1.688	9.537	3.437	1.227	5.012
	Yang Y et al., 2017 JGR	Segment 28	49.6421	37.7715	2941	basalt (whole rock)	SW-4	49.29	1.42	14.61	12.37		0.19	8.58	10.87	2.57	0.11	0.12	-0.42	99.71	57.8766			43.1		305.7	359.7			167	99.69				1.036	86.97	34.93	95	1.262			8.079	2.572	8.626	1.707	9.735	3.533	1.232	5.012
	Yang Y et al., 2017 JGR	Segment 28	49.6421	37.7715	2941	basalt (whole rock)	SW-5	49.12	1.42	14.61	12.94		0.23	8.61	10.83	2.58	0.09	0.12	-0.85	99.7	56.8602			40.93		301.5	376.9			166.7	105.3				0.887	86.92	34.86	92.82	1.267			8.534	2.74	8.861	1.777	9.862	3.619	1.258	5.051
	Yang Y et al., 2013 Litho	Segment 28	48.6	38.13	2274	basalt (whole rock)	SW-V-4	49.3	1.09	14.78	10.59		0.17	9.33	11.14	2.22	0.11	0.09		99.43	63.5729																						1.66	5.35	1	5.93	2.39	0.978	3.43
	Yang Y et al., 2013 Litho	Segment 28	49.65	37.77	2875	basalt (whole rock)	IR-2	49.13	1.4	14.59	11.62		0.19	8.53	10.92	3.21	0.16	0.12		99.7	59.2525																						2.59	8.68	1.69	9.31	3.46	1.21	4.87
	Yang Y et al., 2013 Litho	Segment 28	49.65	37.78	2752	basalt (whole rock)	SW-8-B	49.07	1.43	14.52	12.52		0.21	8.51	10.85	2.6	0.14	0.12		99.7	57.3823																						2.67	8.73	1.72	9.76	3.6	1.27	5.18
	Yang Y et al., 2013 Litho	Segment 28	49.65	37.78	2752	basalt (whole rock)	SW-9-A	49.13	1.42	14.6	12.81		0.22	8.6	10.83	2.62	0.09	0.12		99.71	57.0793																						2.65	8.85	1.72	9.64	3.5	1.24	5.03
	This study (No. 215)	Mountain Jourdanne	63.9358	27.849	2958	basalt (glass)	30I-2-1-4-1	50.814	1.393	15.826	9.03967	8.134	0.174	6.713	10.863	4.222	0.223			98.407	59.5313																						6.11	16.7	2.76	13.2	3.94	1.4	5.02
	This study (No. 217)	Mountain Jourdanne	63.9358	27.849	2958	basalt (glass)	30I-2-1-5	50.927	1.393	15.688	9.11857	8.205	0.155	6.758	11.023	4.177	0.275			98.656	59.4829
	This study (No. 218)	Mountain Jourdanne	63.9358	27.849	2958	basalt (glass)	30I-2-1-6	50.94	1.416	15.785	9.15525	8.238	0.138	6.859	11.043	4.143	0.246			98.858	59.7434
	This study (No. 221)	Mountain Jourdanne	63.9358	27.849	2958	basalt (glass)	30I-2-1-9	50.739	1.409	15.698	9.1308	8.216	0.175	6.821	10.848	4.363	0.226			98.574	59.6741
	This study (No. 232)	Mountain Jourdanne	63.9358	27.849	2958	basalt (glass)	30I-2-1-14	51.254	1.42	15.806	9.24749	8.321	0.126	7.088	10.545	4.36	0.246			99.216	60.2909
	This study (No. 256)	Mountain Jourdanne	63.9358	27.849	2958	basalt (glass)	30I-2-1-23	51.301	1.384	15.718	9.01966	8.116	0.181	6.929	10.895	4.197	0.273			98.994	60.345
	Yang Y et al., 2013 Lithos	Mountain Jourdanne	63.94	27.85	2951	basalt (glass)	SW-7	50.59	1.61	15.1	11.12		0.17	6.4	10.22	4.02	0.3	0.18		99.7	53.2729																						6.11	16.7	2.76	13.2	3.94	1.4	5.02
	Li Wei et al., 2019 Minerals	Mountain Jourdanne	63.936	27.849	2958	basalt (glass)	GL1-1-30I-TVG2-1	51.754	1.725	16.008	8.14837	7.332	0.123	6.761	10.621	4.008	0.261	0.188		98.853	62.1731														2.10813	215.943	29.1021	125.435	4.16204			24.3315	5.60125	16.3105	2.28672	12.6628	3.80581	1.33066	4.34318
	Li Wei et al., 2019 Minerals	Mountain Jourdanne	63.936	27.849	2958	basalt (glass)	GL1-2	51.764	1.353	15.931	8.21283	7.39	0.103	7.116	10.663	4.005	0.236	0.219		98.78	63.1859														1.39531	223.829	27.9917	126.283	4.28516			25.4185	5.56903	16.3567	2.46317	11.8877	3.53979	1.31801	4.09072
	Li Wei et al., 2019 Minerals	Mountain Jourdanne	63.936	27.849	2958	basalt (glass)	GL1-3	51.726	1.257	15.906	7.96722	7.169	0.062	6.901	10.52	4.007	0.258	0.176		97.982	63.1785														2.2223	212.032	28.0484	126.816	4.0547			25.1897	5.53437	16.7562	2.56289	12.0136	3.80346	1.30409	4.1899
	Li Wei et al., 2019 Minerals	Mountain Jourdanne	63.936	27.849	2958	basalt (glass)	GL1-4	51.661	1.258	15.861	8.08169	7.272	0.126	6.879	10.592	4.072	0.246	0.203		98.17	62.7714														2.14913	212.705	28.8488	122.919	4.24434			25.6057	5.58854	16.6847	2.30117	12.3676	3.77488	1.32193	3.46357
	Li Wei et al., 2019 Minerals	Mountain Jourdanne	63.936	27.849	2958	basalt (glass)	GL1-5	52.052	1.505	15.802	8.32618	7.492	0.178	6.978	10.507	3.838	0.258	0.171		98.813	62.4081														2.06191	209.42	28.414	128.535	4.13345			23.8607	5.4289	16.0979	2.371	11.6611	3.91966	1.39278	3.83603
	Li Wei et al., 2019 Minerals	Mountain Jourdanne	63.936	27.849	2958	basalt (glass)	GL1-6	52.02	1.189	15.919	8.06057	7.253	0.197	6.877	10.438	4.055	0.257	0.178		98.419	62.8257														1.91847	207.782	28.4869	120.695	4.15214			25.5748	5.53938	15.6335	2.50652	11.2011	3.33663	1.38333	4.12762
	Li Wei et al., 2019 Minerals	Mountain Jourdanne	63.936	27.849	2958	basalt (glass)	GL1-7	51.335	1.315	15.783	8.20171	7.38	0.196	6.954	10.764	4.098	0.229	0.158		98.284	62.6803
	Li Wei et al., 2019 Minerals	Mountain Jourdanne	63.936	27.849	2958	basalt (glass)	GL1-8	52.026	1.574	15.772	8.1517	7.335	0.153	7.011	10.636	3.987	0.238	0.157		98.943	63.0137
	Li Wei et al., 2019 Minerals	Mountain Jourdanne	63.936	27.849	2958	basalt (glass)	GL1-9	52.017	1.382	15.939	8.35619	7.519	0.093	6.851	10.674	3.969	0.235	0.18		98.909	61.8914
	Li Wei et al., 2019 Minerals	Mountain Jourdanne	63.936	27.849	2958	basalt (glass)	GL1-10	51.813	1.591	16.076	8.46399	7.616	0.159	6.915	10.633	4.096	0.241	0.198		99.37	61.8084
	Li Wei et al., 2019 Minerals	Mountain Jourdanne	63.936	27.849	2958	basalt (glass)	GL2-1-30I-TVG2-2	51.597	1.219	15.831	7.87387	7.085	0.173	6.87	10.553	3.974	0.249	0.182		97.747	63.3478														2.0065	205.437	27.7815	122.051	4.10956			25.062	5.40687	16.1437	2.44656	12.2054	3.2737	1.19051	4.19761
	Li Wei et al., 2019 Minerals	Mountain Jourdanne	63.936	27.849	2958	basalt (glass)	GL2-2	51.05	1.336	15.827	7.80496	7.023	0.176	6.871	10.623	4.022	0.24	0.162		97.389	63.555														2.09156	208.873	28.0109	122.187	4.21629			24.3202	5.54383	16.3483	2.60149	12.0525	3.59702	1.35702	4.3738
	Li Wei et al., 2019 Minerals	Mountain Jourdanne	63.936	27.849	2958	basalt (glass)	GL2-3	51.89	1.602	15.721	8.34508	7.509	0.128	6.811	10.601	3.932	0.253	0.185		98.718	61.7847														2.29767	206.298	27.8766	120.837	3.94105			24.6117	5.69978	16.1829	2.41308	11.3866	3.85432	1.49115	4.68495
	Li Wei et al., 2019 Minerals	Mountain Jourdanne	63.936	27.849	2958	basalt (glass)	GL2-4	52.058	1.266	15.845	8.37175	7.533	0.069	6.812	10.526	3.797	0.232	0.191		98.329	61.7127														2.205	207.174	28.1836	126.739	3.96738			25.0313	5.41116	16.1084	2.41654	11.6485	3.47425	1.37149	4.11837
	Li Wei et al., 2019 Minerals	Mountain Jourdanne	63.936	27.849	2958	basalt (glass)	GL2-5	51.841	1.285	15.795	8.21283	7.39	0.231	6.861	10.527	4.007	0.252	0.151		98.354	62.333														2.02187	207.626	28.0619	122.11	4.02773			25.1496	5.46808	15.9707	2.44298	11.4348	3.53	1.25659	4.2228
	Li Wei et al., 2019 Minerals	Mountain Jourdanne	63.936	27.849	2958	basalt (glass)	GL2-6																												2.25438	207.388	28.0089	123.001	4.28806			26.0223	5.56359	16.0703	2.35883	11.7438	3.27114	1.37315	3.9764
	Yang Y et al., 2013 Litho	Mountain Jourdanne	63.94	27.84	2985	bssalt (whole rock)	IR-5	51.15	1.63	15.05	10.12		0.17	6.36	10.73	3.87	0.31	0.15		99.53	55.4548																						6.16	17.7	2.84	13.7	4.01	1.42	5
	Li Wei et al., 2019 Minerals	Mountain Jourdanne	63.923	27.851	2743	basalt (whole rock)	49I-TVG01	51.17	1.14	17.72	7.76		0.13	7.34	10.97	3.86	0.2	0.14	-0.41	100	65.2015			32.8		181	263		33.2	93.4	65.8	68.5			1.77	232	23.4	101	3			22.1	4.41	17.8	1.97	9.43	2.65	1.11	3.33
	Li Wei et al., 2019 Minerals	Mountain Jourdanne	63.923	27.851	2743	basalt (whole rock)	49I-TVG01	51.06	1.13	17.76	7.76		0.13	7.28	10.94	3.92	0.2	0.14	-0.35	99.96	65.015
	Li Wei et al., 2019 Minerals	Mountain Jourdanne	63.923	27.851	2759	basalt (whole rock)	20VII-TVG19-1	51.04	1.17	17.52	7.77		0.13	7.23	10.88	3.86	0.23	0.14	-0.22	99.75	64.8287
	Li Wei et al., 2019 Minerals	Mountain Jourdanne	63.935	27.842		basalt (whole rock)	26VI-TVG02-1	51.51	1.58	15.49	9.54		0.17	6.44	10.63	4.47	0.26	0.19	-0.4	99.88	57.2139			42.5		236	207		33.2	43.7	82.5	68.7			2.16	195	33.5	141	4.52			26.9	6.34	17.5	2.56	12.5	4	1.36	5.13
	Li Wei et al., 2019 Minerals	Mountain Jourdanne	63.935	27.849	2936	basalt (whole rock)	26VI-TVG03-1	51.42	1.6	15.36	9.86		0.17	6.43	10.44	4.39	0.28	0.2	-0.6	99.56	56.3662			43.3		244	174		34.6	41.3	82.8	70.6			2.47	195	35.1	145	4.72			27	6.49	18	2.59	13.3	4.07	1.42	5.02
	Li Wei et al., 2019 Minerals	Mountain Jourdanne	63.935	27.849	2936	basalt (whole rock)	26VI-TVG03-1-2	51.66	1.63	15.45	9.8		0.17	6.41	10.49	4.44	0.29	0.2	-0.4	100.14	56.4397			43.4		240	174		34.2	42	85	72.9			2.64	201	35.5	149	4.91			26.5	6.56	18.2	2.68	13.3	4.1	1.43	5.28
	Li Wei et al., 2019 Minerals	Mountain Jourdanne	63.94	27.85		basalt (whole rock)	19III-TVG3-1	51.45	1.62	15.28	9.96		0.18	6.42	10.41	4.34	0.27	0.2	-0.39	99.74	56.0796			43.3		240	152		35.1	41.2	88.3	124			2.36	186	35.4	144	4.75			26.1	6.21	17.7	2.76	12.7	4.02	1.45	5.16
	Li Wei et al., 2019 Minerals	Mountain Jourdanne	63.936	27.849	2958	basalt (whole rock)	30I-TVG2-1	51.16	0.87	20.81	5.81		0.12	5.09	11.58	3.95	0.18	0.11	-0.04	99.64	63.4425			26.3		147	223		132	58.4	60.5	42.7			1.42	271	18.7	79.4	3.41			17.9	3.6	10.2	1.56	7.66	2.29	0.9	2.72
	Li Wei et al., 2019 Minerals	Mountain Jourdanne	63.936	27.849	2958	bsalt (whole rock)	30I-TVG2-2	51.48	0.79	21.89	5.22		0.09	4.54	11.89	3.88	0.17	0.1	-0.1	99.94	63.2738			22.1		125	205		104	48.8	44.9	35.3			1.15	283	15.7	66.7	2.7			16	3.28	8.85	1.35	6.62	1.87	0.84	2.22
	(a) Yu X, Dick HJB (2020) Plate-driven micro-hotspots and the evolution of the Dragon Flag melting anomaly, Southwest Indian Ridge. Earth Planet Sci Lett 531:116002
	(b) Yang AY, Zhou MF, Zhao TP, Deng XG, Qi L, Xu JF (2014) Chalcophile elemental compositions of morbs from the ultraslow-spreading southwest indian ridge and controls of lithospheric structure on s-saturated differentiation. Chem. Geol. 382: 1-13.
	(c) Yu M, Su X, Tao CH (2013) Petrological and Geochemical Features of Basalts at 49. 6°E and 50. 5°E Hydrothermal Fields along the Southwest Indian Ridge. Geoscience 27: 497–508 (in Chinese)
	(d) Yang AY, Zhao T-P, Zhou M-F, Deng X-G (2017) Isotopically enriched N-MORB: A new geochemical signature of off-axis plume-ridge interaction—A case study at 50°28′E, Southwest Indian Ridge. J Geophys Res: Solid Earth 122(1):191-213
	(e) Yang AY, Zhao T, Zhou M, Deng X, Wang G. Li J (2013) Os isotopic compositions of MORBs from the ultra-slow spreading Southwest Indian Ridge: Constraints on the assimilation and fractional crystallization (AFC) processes. Lithos 179: 28–35.
	(f) Le Voyer M, Hauri EH, Cottrell E, Kelley KA, Salters VJM, Langmuir CH, Hilton DR, Barry PH, Füri E (2019) Carbon Fluxes and Primary Magma CO2 Contents Along the Global Mid-Ocean Ridge System. Geochem Geophys Geosyst 20(3): 1387-1424.
	(g) Ou Q, Nichols ARL, Carvalho BB, Zi F, Wang K, Li J, Zhang L, Liu JY (2021) The role of axial discontinuities in oceanic crustal evolution: Evidence from elemental and Mo-Sr-Nd-Pb-Hf isotopic compositions of rock suites from the Southwest Indian Ridge (42°–53°E). Marine Geol. 442: 106626.
	(h) Li W, Tao C, Zhang W, Liu J, Liang J, Liao S, Yang W (2019) Melt Inclusions in Plagioclase Macrocrysts at Mount Jourdanne, Southwest Indian Ridge (~64° E): Implications for an Enriched Mantle Source and Shallow Magmatic Processes. Minerals, 9: 493.
[truncated: 30 more columns]
