# Supplementary material for: Magmatic processes within the plumbing system of the ultraslow-spreading southwest Indian ridge: constraints from olivine, plagioclase and melt inclusions
Source: Springer Nature journal article supplement (doi:10.1007/s00410-024-02098-0), 2024-02-22
Supplement: MOESM8 [file 410_2024_2098_MOESM8_ESM.xls]

## Sheet: Table S7
	Supplemental Table S7 Calculated results of the crystallization pressures for basaltic glasses and its mineral hosted melt inclusions of the studied PUBs and MORB data of whole SWIR from database of EarthChem
	Data source	longitude（°E）	latitude（°S）	Zone	Type/method	Sample/spot	CaO-excess	MEP (kbar)	σ (kbar)	Note
	(a)	50.4829	37.6591	segment 27	basalt (whole rock)	SW27-1	-0.616365	2.91922	1.4
	(a)	50.4725	37.6605	segment 27	basalt (whole rock)	SW27-3	-0.54235	2.74881	1.4
	(a)	50.4703	37.6582	segment 27	basalt (whole rock)	SW27-6	-0.894083	2.29104	1.4
	(b)	50.47	37.66	segment 27	basalt (whole rock)	DY115-19-3-11-2	-0.466	8.0814	1.4
	(b)	50.47	37.66	segment 27	basalt (whole rock)	DY115-20-4-7	-0.23	8.66315	1.4
	(b)	50.47	37.66	segment 27	basalt (whole rock)	DY115-19-3-12	-0.396	7.34125	1.4
	(b)	50.47	37.66	segment 27	basalt (whole rock)	DY115-19-3-10	-0.239	6.02513	1.4
	(b)	50.47	37.66	segment 27	basalt (whole rock)	DY115-19-3-8-1	-1.069	3.64461	1.4
	(b)	50.47	37.66	segment 27	basalt (whole rock)	DY115-19-3-9	-0.987	3.33332	1.4
	(b)	50.47	37.66	segment 27	basalt (whole rock)	DY115-19-3-8-2	-0.966	3.28646	1.4
	(b)	50.47	37.68	segment 27	basalt (whole rock)	DY115-20-5-6	-0.621	2.54941	1.4
	(c)	50.4671	37.6579	segment 27	basalt (whole rock)	TVG14	-0.326	3.04182	1.4
	(a)	50.4642	37.6684	segment 27	basalt (whole rock)	SW27-4	-0.240616	6.02833	1.4
	(a)	50.4627	37.6541	segment 27	basalt (whole rock)	SW27-5	0.139428			with excess CaO
	(b)	50.46	37.65	segment 27	basalt (whole rock)	DY115-19-3-14-2	-0.48	6.72904	1.4
	(d)	50.4713	37.6804	segment 27	basalt (whole rock)	21VI-14-8	-1.03181	3.19336	1.4
	(d)	50.4678	37.6792	segment 27	basalt (whole rock)	21VI-11-7	-1.02658	3.05812	1.4
	(d)	50.4678	37.6792	segment 27	basalt (whole rock)	SW-V-6	-0.783318	2.23781	1.4
	(d)	50.4703	37.6583	segment 27	basalt (whole rock)	SW-III-8-1	-1.05656	3.60853	1.4
	(d)	50.4703	37.6583	segment 27	basalt (whole rock)	SW-III-8-2	-0.973079	3.3598	1.4
	(d)	50.4703	37.6583	segment 27	basalt (whole rock)	SW-Ⅲ-9	-0.955285	3.3164	1.4
	(d)	50.4703	37.6583	segment 27	basalt (whole rock)	20V-11-3	-0.77019	2.37843	1.4
	(d)	50.4703	37.6583	segment 27	basalt (whole rock)	SW-Ⅲ-11-1	-0.480527	7.94132	1.4
	(d)	50.4703	37.6583	segment 27	basalt (whole rock)	SW-Ⅲ-11-2	-0.451194	7.99443	1.4
	(d)	50.4704	37.659	segment 27	basalt (whole rock)	SW-Ⅲ-12	-0.388553	7.31673	1.4
	(d)	50.467	37.6572	segment 27	basalt (whole rock)	SW-IV-7	-0.213917	8.55388	1.4
	(d)	50.467	37.6572	segment 27	basalt (whole rock)	SW-Ⅲ-22	-0.284953	8.6587	1.4
	(d)	50.4627	37.6542	segment 27	basalt (whole rock)	SW-Ⅲ-14-1	-0.570015	6.39562	1.4
	(d)	50.4627	37.6542	segment 27	basalt (whole rock)	SW-Ⅲ-14-2	-0.49373	6.78406	1.4
	(d)	50.4627	37.6542	segment 27	basalt (whole rock)	SW-III-15	-0.650015	6.36307	1.4
	(e)	50.97	37.61	segment 27	basalt (whole rock)	SW-III-18	-0.857	2.89892	1.4
	(e)	50.99	37.61	segment 27	basalt (whole rock)	SW-III-20	-0.94	2.66945	1.4
	(e)	51.72	37.47	segment 27	basalt (whole rock)	SW-III-21	-0.719	3.49605	1.4
	(e)	50.46	37.65	segment 27	basalt (whole rock)	SW-III-14-1	-0.573	6.13104	1.4
	(e)	50.46	37.65	segment 27	basalt (whole rock)	SW-III-14-2	-0.49	6.29437	1.4
	(e)	50.47	37.66	segment 27	basalt (whole rock)	SW-III-12	-0.386	6.96131	1.4
	(e)	55.71	34.28	segment 27	whole rock-XRF	SW-V-1	-0.787	3.71515	1.4
	(k)	50.47	37.66	segment 27	whole rock-XRF	DY0115-020-004-007	-0.21	8.54937	1.4
	(k)	50.47	37.68	segment 27	whole rock-XRF	DY0115-020-005-006	-0.783	2.25433	1.4
	(k)	50.47	37.66	segment 27	whole rock-XRF	DY0115-020-005-012	-0.386	6.96131	1.4
	(k)	50.4671	37.6579	segment 27	whole rock-XRF	DY0115-020-005-014-1	-0.573	6.13104	1.4
	(k)	50.4671	37.6579	segment 27	whole rock-XRF	DY0115-020-005-014-2	-0.49	6.29437	1.4
	(k)	50.47	37.68	segment 27	whole rock-XRF	DY0115-021-005-011-007	-1.022	3.04584	1.4
	(k)	50.47	37.66	segment 27	whole rock-XRF	DY0115-020-003-008-002	-0.976	3.3597	1.4
	(k)	50.47	37.66	segment 27	whole rock-XRF	DY0115-020-003-011-001	-0.477	7.94079	1.4
	(k)	50.47	37.66	segment 27	whole rock-XRF	DY0115-020-003-022	-0.288	8.66328	1.4
	(k)	50.46	37.65	segment 27	whole rock-XRF	DY0115-020-003-014-002	-0.49	6.75763	1.4
	(k)	50.46	37.65	segment 27	whole rock-XRF	DY0115-020-003-015	-0.648	6.35355	1.4
	(k)	50.47	37.66	segment 27	whole rock-XRF	DY0115-020-003-008-001	-1.059	3.60705	1.4
	(k)	50.47	37.66	segment 27	whole rock-XRF	DY0115-020-003-009	-0.957	3.31987	1.4
	(k)	50.47	37.66	segment 27	whole rock-XRF	DY0115-020-005-011-3	-0.772	2.37504	1.4
	(k)	50.47	37.66	segment 27	whole rock-XRF	DY0115-020-003-011-002	-0.446	7.99556	1.4
	(k)	50.47	37.66	segment 27	whole rock-XRF	DY0115-020-003-012	-0.386	7.32964	1.4
	(k)	50.46	37.65	segment 27	whole rock-XRF	DY0115-020-003-014-001	-0.573	6.39763	1.4
	(k)	50.47	37.68	segment 27	whole rock-XRF	DY0115-021-005-014-008	-1.038	3.22082	1.4
	(k)	50.47	37.66	segment 27	glass-EMPA data	DY0115-019-003-008-001	-1.069	3.45625	1.4
	(k)	50.47	37.66	segment 27	glass-EMPA data	DY0115-019-003-008-002	-0.966	3.10039	1.4
	(k)	50.47	37.66	segment 27	glass-EMPA data	DY0115-019-003-009	-0.987	3.14338	1.4
	(k)	50.47	37.66	segment 27	glass-EMPA data	DY0115-019-003-010	-0.239	5.76664	1.4
	(k)	50.47	37.66	segment 27	glass-EMPA data	DY0115-019-003-011-002	-0.466	7.79173	1.4
	(k)	50.47	37.66	segment 27	glass-EMPA data	DY0115-019-003-012	-0.396	6.9726	1.4
	(k)	50.46	37.65	segment 27	glass-EMPA data	DY0115-019-003-014-002	-0.48	6.26388	1.4
	(k)	50.47	37.66	segment 27	glass-EMPA data	DY0115-020-004-007	-0.23	8.42689	1.4
	(k)	50.47	37.68	segment 27	glass-EMPA data	DY0115-020-005-006	-0.621	2.38313	1.4
	This study	50.4853	37.697	segment 27	plagioclase hosted melt inclusion	34TVG-6MI	1.43827			with excess CaO
	(j)	51.56	37.43	segment 27	plagioclase hosted melt inclusion	1-A-MI1	-0.0255	5.32098
	(j)	51.56	37.43	segment 27	plagioclase hosted melt inclusion	2-A-MI2	-0.07035	4.58865
	(j)	51.56	37.43	segment 27	plagioclase hosted melt inclusion	2-A-MI3	-0.29051	4.91139
	(j)	51.56	37.43	segment 27	plagioclase hosted melt inclusion	2-A-MI4	-0.25551	2.94156
	(j)	51.56	37.43	segment 27	plagioclase hosted melt inclusion	2-A-MI5	-0.23898	5.41849
	(j)	51.56	37.43	segment 27	plagioclase hosted melt inclusion	2-A-MI6	-0.06099	3.73318
	(j)	51.56	37.43	segment 27	plagioclase hosted melt inclusion	2-A-MI9	-0.04258	4.0519
	(j)	51.56	37.43	segment 27	plagioclase hosted melt inclusion	2-D-MI1	-1.24224	1.79767
	(j)	51.56	37.43	segment 27	plagioclase hosted melt inclusion	2-E-2-MI1	-0.38805	1.88221
	(j)	51.56	37.43	segment 27	plagioclase hosted melt inclusion	2-E-2-MI3	-0.51	1.6655
	(j)	51.56	37.43	segment 27	plagioclase hosted melt inclusion	2-E-2-MI5	-0.345	2.92977
	(j)	51.56	37.43	segment 27	plagioclase hosted melt inclusion	2-E-3-MI1	-0.68441	2.87793
	(j)	51.56	37.43	segment 27	plagioclase hosted melt inclusion	2-E-3-MI3	-0.8442	2.76484
	(j)	51.56	37.43	segment 27	plagioclase hosted melt inclusion	2-F-MI1a	-0.49833	1.93585
	(j)	51.56	37.43	segment 27	plagioclase hosted melt inclusion	2-F-MI1b	-0.52937	1.77699
	(j)	51.56	37.43	segment 27	plagioclase hosted melt inclusion	2-F-MI2	-1.18084	2.58106
	(j)	51.56	37.43	segment 27	plagioclase hosted melt inclusion	3-A-MI1	-0.10884	2.44004
	(j)	51.56	37.43	segment 27	plagioclase hosted melt inclusion	3-A-MI2	-0.14628	2.77006
	(j)	51.56	37.43	segment 27	plagioclase hosted melt inclusion	3-A-MI3	-0.08292	3.34556
	(j)	51.56	37.43	segment 27	plagioclase hosted melt inclusion	3-A-MI4	-0.0114	2.9106
	(j)	51.56	37.43	segment 27	plagioclase hosted melt inclusion	3-A-MI5	-0.2147	3.2562
	(j)	51.56	37.43	segment 27	plagioclase hosted melt inclusion	3-A-MI6	-0.30484	3.59234
	(j)	51.56	37.43	segment 27	plagioclase hosted melt inclusion	3-B-MI1	-0.03668	4.25415
	(j)	51.56	37.43	segment 27	plagioclase hosted melt inclusion	3-C-MI1	-0.84396	2.26518
	(j)	51.56	37.43	segment 27	plagioclase hosted melt inclusion	3-C-MI2	-0.87905	0.75343
	(j)	51.56	37.43	segment 27	plagioclase hosted melt inclusion	3-C-MI3	-1.034	2.38285
	(j)	51.56	37.43	segment 27	plagioclase hosted melt inclusion	3-C-MI5	-1.0931	3.21609
	(j)	51.56	37.43	segment 27	plagioclase hosted melt inclusion	3-E-MI2	-1.18009	2.66857
	(j)	51.56	37.43	segment 27	plagioclase hosted melt inclusion	3-E-MI3	-1.17475	1.73942
	(j)	51.56	37.43	segment 27	plagioclase hosted melt inclusion	3-F-MI1	-0.779	2.10681
	(j)	51.56	37.43	segment 27	plagioclase hosted melt inclusion	3-G-MI3	-0.64076	3.62798
	(j)	51.56	37.43	segment 27	plagioclase hosted melt inclusion	3-G-MI4	-0.43404	4.29476
	(j)	51.56	37.43	segment 27	plagioclase hosted melt inclusion	4-A-MI1	-0.1632	2.21835
	(j)	51.56	37.43	segment 27	plagioclase hosted melt inclusion	4-B-MI4	-0.24452	0.25777
	This study	49.6647	37.8112	segment 28	basaltic glass-XRF	DY30II-1	-0.554	8.80916	1.4
	This study	49.6872	37.7386	segment 28	basaltic glass-XRF	30IV-TVG04	-0.669	7.94922	1.4
	(f)	49.882	37.71	Segment 28	whole-XRF	MD34D3	0.103388			with excess CaO
	(f)	49.882	37.71	Segment 28	whole-XRF	DUF0034-003	-0.1497	3.41528	1.4
	(f)	49.882	37.71	Segment 28	whole-XRF	MD34-D3	0.103388			with excess CaO
	(g)	49.7819	37.8643	Segment 28	glass-XRF	30-TVG3-3	-0.925	4.27647	1.4
	(g)	49.6385	37.7819	Segment 28	glass-XRF	30-TVG10	-0.651	3.41668	1.4
	(g)	49.6561	37.7889	Segment 28	glass-XRF	Dy115-D13	-0.013	6.81981	1.4
	(a)	49.6872	37.7386	Segment 28	basalt (whole rock)	SW28-6	2.51297			with excess CaO
	(b)	49.64	37.77	Segment 28	basalt (whole rock)	DY115-17-3	-1.123	4.46408	1.4
	(b)	49.64	37.77	Segment 28	basalt (whole rock)	DY115-17-4	-1.026	3.9586	1.4
	(b)	49.64	37.77	Segment 28	basalt (whole rock)	DY115-17-5	-1.117	4.36315	1.4
	(e)	49.65	37.77	Segment 28	basalt (whole rock)	DY115-17-2A	-1.021	2.67807	1.4
	(a)	49.6385	37.7819	Segment 28	basalt (whole rock)	SW28-14	-0.342115	2.46465	1.4
	(a)	49.6504	37.7832	Segment 28	basalt (whole rock)	SW28-13	-0.625044	2.27126	1.4
	(c)	49.6527	37.7835	Segment 28	basalt (whole rock)	TVG6	-0.611		1.4
	(a)	49.7988	37.8033	Segment 28	basalt (whole rock)	SW28-1	0.100077			with excess CaO
	(a)	49.7736	37.8246	Segment 28	basalt (whole rock)	SW28-4	-0.975324	1.99977	1.4
	(a)	49.6613	37.8322	Segment 28	basalt (whole rock)	SW28-7	-2.87206	6.80277	1.4
	(a)	49.7819	37.8463	Segment 28	basalt (whole rock)	SW28-2	-1.28792	1.08588	1.4
	(a)	49.7755	37.8489	Segment 28	basalt (whole rock)	SW28-3	-1.06067	2.25942	1.4
	(a)	49.7125	37.8512	Segment 28	basalt (whole rock)	SW28-5	-0.635461	3.78915	1.4
	(a)	49.6537	37.8768	Segment 28	basalt (whole rock)	SW28-11	-0.947154	3.51827	1.4
	(d)	49.6527	37.7835	Segment 28	basalt (whole rock)	21V-29-6	-0.895531	2.7845	1.4
	(d)	49.652	37.7822	Segment 28	basalt (whole rock)	SW-Ⅲ-5	-1.02763	3.25628	1.4
	(d)	49.652	37.7822	Segment 28	basalt (whole rock)	SW-Ⅲ-6	-1.01727	2.98209	1.4
	(d)	49.6502	37.7832	Segment 28	basalt (whole rock)	SW-Ⅲ-1	-0.599466	2.50872	1.4
	(d)	49.6502	37.7832	Segment 28	basalt (whole rock)	SW-Ⅲ-2	-0.597723	2.34658	1.4
	(d)	49.65	37.7836	Segment 28	basalt (whole rock)	SW-8-A	-1.085	3.89398	1.4
	(d)	49.65	37.7836	Segment 28	basalt (whole rock)	SW-8-B	-1.097	3.85318	1.4
	(d)	49.65	37.7836	Segment 28	basalt (whole rock)	SW-8-C	-1.087	3.83286	1.4
	(d)	49.65	37.7836	Segment 28	basalt (whole rock)	SW-9-A	-1.09	4.25546	1.4
	(d)	49.65	37.7836	Segment 28	basalt (whole rock)	SW-9-B	-1.044	3.62475	1.4
	(d)	49.65	37.7836	Segment 28	basalt (whole rock)	SW-9-C	-1.224	2.90222	1.4
	(d)	49.65	37.7836	Segment 28	basalt (whole rock)	SW-Ⅱ-1	-0.902774	3.88448	1.4
	(d)	49.6492	37.7833	Segment 28	basalt (whole rock)	21V-3-1	-1.07094	3.56197	1.4
	(d)	49.6484	37.7831	Segment 28	basalt (whole rock)	SW-Ⅲ-3	-1.06235	2.69713	1.4
	(d)	49.6484	37.7831	Segment 28	basalt (whole rock)	SW-Ⅲ-4-1	-1.00184	3.3657	1.4
	(d)	49.6484	37.7831	Segment 28	basalt (whole rock)	SW-Ⅲ-4-2	-0.789195	3.42296	1.4
	(d)	49.6482	37.784	Segment 28	basalt (whole rock)	20IV-7-1	-1.02629	3.58235	1.4
	(d)	49.6482	37.784	Segment 28	basalt (whole rock)	SW-Ⅲ-7	-0.991001	3.29205	1.4
	(d)	49.6482	37.784	Segment 28	basalt (whole rock)	SW-IV-2 g	-0.953634	3.37866	1.4
	(d)	49.6481	37.7802	Segment 28	basalt (whole rock)	SW-Ⅲ-17	-1.17982	3.35067	1.4
	(d)	49.6469	37.7718	Segment 28	basalt (whole rock)	IR-2	-1.021	3.04404	1.4
	(d)	49.6421	37.7715	Segment 28	basalt (whole rock)	SW-3	-1.093	4.27722	1.4
	(d)	49.6421	37.7715	Segment 28	basalt (whole rock)	SW-4	-1.056	4.02887	1.4
	(d)	49.6421	37.7715	Segment 28	basalt (whole rock)	SW-5	-1.087	4.3356	1.4
	(e)	48.6	38.13	Segment 28	basalt (whole rock)	SW-V-4	-0.561	3.53089	1.4
	(e)	49.65	37.77	Segment 28	basalt (whole rock)	IR-2	-1.021	2.67807	1.4
	(e)	49.65	37.78	Segment 28	basalt (whole rock)	SW-8-B	-1.097	3.50395	1.4
	(e)	49.65	37.78	Segment 28	basalt (whole rock)	SW-9-A	-1.09	3.90506	1.4
	(k)	49.882	-37.71	segment 28	glass-EMPA data	DUF0034-003-glass	-0.14919	3.51646	1.4
	(k)	49.77	-37.79	segment 28	glass-EMPA data	DUF0107-076-002-003	-0.889	2.14937	1.4
	(k)	49.64	-37.77	segment 28	whole rock-EMPA data	DY0115-017-003	-1.123	4.46408	1.4
	(k)	49.64	-37.77	segment 28	whole rock-EMPA data	DY0115-017-004	-1.026	3.9586	1.4
	(k)	49.64	-37.77	segment 28	whole rock-EMPA data	DY0115-017-005	-1.117	4.36315	1.4
	This study	49.6872	37.7386	Segment 28	olivine hosted melt inclusion	DY30IV-1	1.8573			with excess CaO
	This study	49.6872	37.7386	Segment 28	plagioclase hosted melt inclusion	30TVG-4-2MI	2.55365			with excess CaO
	This study	63.9358	27.849	Mountain Jourdanne	basaltic glass-XRF	30I-TVG02-1	-1.736	9.36674	1.4
	This study (No. 215)	63.9358	27.849	Mountain Jourdanne	glass-EMPA data	30I-2-1-4-1	-1.6231	2.98472	1.4
	This study (No. 217)	63.9358	27.849	Mountain Jourdanne	glass-EMPAdata	30I-2-1-5	-1.4496	2.25431	1.4
	This study (No. 218)	63.9358	27.849	Mountain Jourdanne	glass-EMPAdata	30I-2-1-6	-1.3993	2.62757	1.4
	This study (No. 221)	63.9358	27.849	Mountain Jourdanne	glass-EMPAdata	30I-2-1-9	-1.6057	2.6508	1.4
	This study (No. 232)	63.9358	27.849	Mountain Jourdanne	glass-EMPAdata	30I-2-1-14	-1.8286	3.24766	1.4
	This study (No. 256)	63.9358	27.849	Mountain Jourdanne	glass-EMPAdata	30I-2-1-23	-1.5263	2.42169	1.4
	(h)	63.927	27.8511	Mountain Jourdanne	whole rock-XRF	87-S01	-1.482	5.38382	1.4
	(h)	63.923	27.8512	Mountain Jourdanne	whole rock-XRF	87-S02	-1.562	6.32457	1.4
	(h)	63.926	27.8511	Mountain Jourdanne	whole rock-XRF	87-S03	-1.431	7.08025	1.4
	(h)	63.9267	27.8508	Mountain Jourdanne	whole rock-XRF	87-S06	-1.523	5.92901	1.4
	(i)	63.36	28.11	near area of Mountain Jourdanne	glass-SIMS data	ED22-2-1	-1.567	10.0342	1.4
	(i)	64.06	27.51	Mountain Jourdanne	glass-SIMS data	SMS19-4-4	-1.865	7.15838	1.4
	(j)	63.936	27.849	Mountain Jourdanne	glass-EMPA data	30I-TVG2-1-GL1-1	-1.8507	3.76283	1.4
	(j)	63.936	27.849	Mountain Jourdanne	glass-EMPA data	30I-TVG2-1-GL1-2	-1.7022	3.29999	1.4
	(j)	63.936	27.849	Mountain Jourdanne	glass-EMPA data	30I-TVG2-1-GL1-3	-1.9097	3.20894	1.4
	(j)	63.936	27.849	Mountain Jourdanne	glass-EMPA data	30I-TVG2-1-GL1-4	-1.8443	3.02173	1.4
	(j)	63.936	27.849	Mountain Jourdanne	glass-EMPA data	30I-TVG2-1-GL1-5	-1.8996	3.40322	1.4
	(j)	63.936	27.849	Mountain Jourdanne	glass-EMPA data	30I-TVG2-1-GL1-6	-1.9989	3.17122	1.4
	(j)	63.936	27.849	Mountain Jourdanne	glass-EMPA data	30I-TVG2-1-GL1-7	-1.6498	2.83063	1.4
	(j)	63.936	27.849	Mountain Jourdanne	glass-EMPA data	30I-TVG2-1-GL1-8	-1.7607	3.1471	1.4
	(j)	63.936	27.849	Mountain Jourdanne	glass-EMPA data	30I-TVG2-1-GL1-9	-1.7707	3.23119	1.4
	(j)	63.936	27.849	Mountain Jourdanne	glass-EMPA data	30I-TVG2-1-GL1-10	-1.7925	3.79492	1.4
	(j)	63.936	27.849	Mountain Jourdanne	glass-EMPA data	30I-TVG2-2-GL2-1	-1.886	3.05272	1.4
	(j)	63.936	27.849	Mountain Jourdanne	glass-EMPA data	30I-TVG2-2-GL2-2	-1.8157	3.23256	1.4
	(j)	63.936	27.849	Mountain Jourdanne	glass-EMPA data	30I-TVG2-2-GL2-3	-1.8557	3.14389	1.4
	(j)	63.936	27.849	Mountain Jourdanne	glass-EMPA data	30I-TVG2-2-GL2-4	-1.9304	3.26223	1.4
	(j)	63.936	27.849	Mountain Jourdanne	glass-EMPA data	30I-TVG2-2-GL2-5	-1.9147	3.01903	1.4
	(j)	63.923	27.851	Mountain Jourdanne	whole rock-XRF	49I-TVG01	-1.328	6.83707	1.4
	(j)	63.923	27.851	Mountain Jourdanne	whole rock-XRF	49I-TVG01duplicate	-1.376	6.89	1.4
	(j)	63.923	27.851	Mountain Jourdanne	whole rock-XRF	20VII-TVG19-1	-1.451	6.47111	1.4
	(j)	63.935	27.842	Mountain Jourdanne	whole rock-XRF	26VI-TVG02-1	-1.938	2.27046	1.4
	(j)	63.935	27.849	Mountain Jourdanne	whole rock-XRF	26VI-TVG03-1	-2.131	2.39039	1.4
	(j)	63.935	27.849	Mountain Jourdanne	whole rock-XRF	26VI-TVG03-1-2	-2.087	2.37355	1.4
	(j)	63.94	27.85	Mountain Jourdanne	whole rock-XRF	19III-TVG3-1	-2.164	2.36377	1.4
	(j)	63.936	27.849	Mountain Jourdanne	whole rock-XRF	30I-TVG2-1	-1.393	10.3867	1.4
	(j)	63.936	27.849	Mountain Jourdanne	whole rock-XRF	30I-TVG2-2	-1.248	11.3065	1.4
	(e)	63.94	27.85	Mountain Jourdanne	glass-XRF	SW-7	-2.36	2.87241	1.4
	(k)	63.94	27.85	Mountain Jourdanne	whole rock-XRF	DY0115-017-005A	-1.862	1.75458	1.4
	(k)	63.94	27.85	Mountain Jourdanne	glass-XRF	DY0115-019-007	-2.36	2.87241	1.4
	(k)	63.935	27.85	Mountain Jourdanne	whole rock-XRF	DY0125-26I-TVG2-001	-1.938	2.27046	1.4
	(k)	63.923	27.85	Mountain Jourdanne	whole rock-XRF	DY0135-49I-TVG1	-1.328	6.8836	1.4
	(k)	63.923	27.85	Mountain Jourdanne	whole rock-XRF	DY0115-20VII-TVG19-001	-1.451	6.47111	1.4
	(k)	63.935	27.85	Mountain Jourdanne	whole rock-XRF	DY0125-26I-TVG3-001	-2.131	2.39039	1.4
	(k)	63.935	27.85	Mountain Jourdanne	whole rock-XRF	DY0125-26I-TVG3-001-002	-2.087	2.37355	1.4
	(k)	63.94	27.85	Mountain Jourdanne	whole rock-XRF	DY0115-19III-TVG3-001	-2.164	2.36377	1.4
	(k)	63.91	27.85	Mountain Jourdanne	glass-EMPA data	DUF0107-016	-1.487	5.84915	1.4
	(k)	63.91	27.85	Mountain Jourdanne	whole rock-EMPA data	DUF0107-016	-1.304	5.55689	1.4
	(k)	63.91	27.85	Mountain Jourdanne	whole rock-EMPA data	DUF0107-016-001-001	-0.813	5.66282	1.4
	(k)	63.91	27.85	Mountain Jourdanne	glass-EMPA data	DUF0107-016-002-001	-1.598	4.22945	1.4
	(k)	63.91	27.85	Mountain Jourdanne	whole rock-EMPA data	DUF0107-016-002-001	-1.389	5.81821	1.4
	(k)	63.91	27.85	Mountain Jourdanne	whole rock-EMPA data	DUF0107-016-002-003	-1.307	5.80239	1.4
	(k)	63.91	27.85	Mountain Jourdanne	whole rock-EMPA data	DUF0107-016-003-001	-1.392	6.15011	1.4
	(k)	63.87	27.85	Mountain Jourdanne	whole rock-EMPA data	DUF0107-017	-1.018	4.39069	1.4
	(k)	63.75	27.85	Mountain Jourdanne	whole rock-EMPA data	DUF0107-019-001-002	-1.431	5.78383	1.4
	(k)	63.75	27.85	Mountain Jourdanne	glass-EMPA data	DUF0107-019-001-003	-1.531	4.86706	1.4
	(k)	63.75	27.85	Mountain Jourdanne	whole rock-EMPA data	DUF0107-019-001-003	-1.366	5.75365	1.4
	(k)	63.75	27.85	Mountain Jourdanne	whole rock-EMPA data	DUF0107-019-001-005	-1.588	5.79257	1.4
	(k)	63.75	27.85	Mountain Jourdanne	whole rock-EMPA data	DUF0107-019-001-007	-1.609	5.97595	1.4
	(k)	63.36	27.85	Mountain Jourdanne	glass-EMPA data	DUF0107-022-001-001	-1.728	8.22972	1.4
	(k)	63.36	27.85	Mountain Jourdanne	whole rock-EMPA data	DUF0107-022-001-001	-1.668	11.1221	1.4
	(k)	63.36	27.85	Mountain Jourdanne	whole rock-EMPA data	DUF0107-022-001-002	-1.751	10.1725	1.4
	(k)	63.36	27.85	Mountain Jourdanne	whole rock-EMPA data	DUF0107-022-001-003	-1.7	10.8441	1.4
	(k)	63.36	27.85	Mountain Jourdanne	whole rock-EMPA data	DUF0107-022-002-001	-1.567	10.0343	1.4
	(k)	63.36	27.85	Mountain Jourdanne	whole rock-EMPA data	DUF0107-022-002-002	-3.81	7.17841	1.4
	(k)	63.94	27.85	Mountain Jourdanne	whole rock-EMPA data	DY0115-017-006	-2.28	2.93196	1.4
	(k)	63.94	27.85	Mountain Jourdanne	whole rock-EMPA data	DY0115-017-007	-2.38	2.93872	1.4
	(k)	63.94	27.85	Mountain Jourdanne	whole rock-EMPA data	DY0115-017-010	-2.846	3.14787	1.4
	(k)	63.94	27.85	Mountain Jourdanne	whole rock-EMPA data	DY0115-017-011	-2.787	2.93999	1.4
	(k)	63.94	27.85	Mountain Jourdanne	whole rock-EMPA data	DY0115-017-012	-2.82	3.00427	1.4
	(k)	63.938	27.845	Mountain Jourdanne	LA-ICPMS	SHK0446-001	-2.052	3.86031	1.4
	This study	63.9358	27.849	Mountain Jourdanne	olivine hosted melt inclusion	30I-2-1-25MI	-0.8006	2.27892	1.4
	This study	63.9358	27.849	Mountain Jourdanne	olivine hosted melt inclusion	30I-2-1-3MI	-0.637	1.96827	1.4
	This study	63.9358	27.849	Mountain Jourdanne	olivine hosted melt inclusion	30I-2-1-6MI	-1.0835	3.57901	1.4
	This study	63.9358	27.849	Mountain Jourdanne	olivine hosted melt inclusion	30I-2-1-8MI	-0.6306	1.95287	1.4
	This study	63.9358	27.849	Mountain Jourdanne	olivine hosted melt inclusion	30I-2-1-9MI	-0.9444	2.78088	1.4
	This study	63.9358	27.849	Mountain Jourdanne	olivine hosted melt inclusion	30I-2-1-10MI	-1.5374	3.63318	1.4
	This study	63.9358	27.849	Mountain Jourdanne	olivine hosted melt inclusion	30I-2-1-11-2MI	-1.065	2.80317	1.4
	This study	63.9358	27.849	Mountain Jourdanne	olivine hosted melt inclusion	30I-2-1-12MI	-0.2549	1.71018	1.4
	This study	63.9358	27.849	Mountain Jourdanne	olivine hosted melt inclusion	30I-2-1-13MI	-1.2197	3.65941	1.4
	This study	63.9358	27.849	Mountain Jourdanne	olivine hosted melt inclusion	30I-2-1-14-1MI	-1.2749	3.83143	1.4
	This study	63.9358	27.849	Mountain Jourdanne	olivine hosted melt inclusion	30I-2-1-14-2MI	-1.3336	3.84779	1.4
	This study	63.9358	27.849	Mountain Jourdanne	olivine hosted melt inclusion	30I-2-1-14-3MI	-1.0038	2.64658	1.4
	This study	63.9358	27.849	Mountain Jourdanne	olivine hosted melt inclusion	30I-2-1-15MI	-0.8997	2.84995	1.4
	This study	63.9358	27.849	Mountain Jourdanne	olivine hosted melt inclusion	30I-2-1-18MI	-1.1082	3.45242	1.4
	This study	63.9358	27.849	Mountain Jourdanne	olivine hosted melt inclusion	30I-2-1-19MI	-1.3755	3.68507	1.4
	This study	63.9358	27.849	Mountain Jourdanne	olivine hosted melt inclusion	30I-2-1-20MI	-1.5794	4.24638	1.4
	This study	63.9358	27.849	Mountain Jourdanne	olivine hosted melt inclusion	30I-2-1-22MI	-0.9165	2.82901	1.4
	This study	63.9358	27.849	Mountain Jourdanne	olivine hosted melt inclusion	30I-2-1-23MI	-1.3782	3.30609	1.4
	This study	63.9358	27.849	Mountain Jourdanne	olivine hosted melt inclusion	30I-2-1-24MI	-1.2402	3.75255	1.4
	This study	63.9358	27.849	Mountain Jourdanne	plagioclase hosted melt inclusion	30I-2-1-1MI	-1.70798	5.2798
	This study	63.9358	27.849	Mountain Jourdanne	plagioclase hosted melt inclusion	30I-2-1-2MI	-1.95611	5.67344
	This study	63.9358	27.849	Mountain Jourdanne	plagioclase hosted melt inclusion	30I-2-1-2MI-2	-1.7067	4.51129
	This study	63.9358	27.849	Mountain Jourdanne	plagioclase hosted melt inclusion	30I-2-1-3 mi-1	-1.74339	3.7961
	This study	63.9358	27.849	Mountain Jourdanne	plagioclase hosted melt inclusion	30I-2-1-3 mi-2	-1.79595	4.88214
	This study	63.9358	27.849	Mountain Jourdanne	plagioclase hosted melt inclusion	30I-2-1-11mi	-1.52217	6.12684
	This study	63.9358	27.849	Mountain Jourdanne	plagioclase hosted melt inclusion	30I-2-1-12MI	-1.58455	4.29965
	This study	63.9358	27.849	Mountain Jourdanne	plagioclase hosted melt inclusion	30I-2-1-13MI-1	-1.60987	4.96957
	This study	63.9358	27.849	Mountain Jourdanne	plagioclase hosted melt inclusion	30I-2-1-13MI-2	-1.41013	4.50816
	This study	63.9358	27.849	Mountain Jourdanne	plagioclase hosted melt inclusion	30I-2-1-13MI-3	-1.55827	4.70888
	This study	63.9358	27.849	Mountain Jourdanne	plagioclase hosted melt inclusion	30I-2-1-13MI-4	-1.54225	5.30349
	This study	63.9358	27.849	Mountain Jourdanne	plagioclase hosted melt inclusion	30I-2-1-16mi-1	-1.67295	4.63045
	This study	63.9358	27.849	Mountain Jourdanne	plagioclase hosted melt inclusion	30I-2-1-16mi-2	-1.20464	4.77854
	This study	63.9358	27.849	Mountain Jourdanne	plagioclase hosted melt inclusion	30I-2-1-16mi-3	-1.65856	5.50447
	This study	63.9358	27.849	Mountain Jourdanne	plagioclase hosted melt inclusion	30I-2-1-16mi-4	-2.42886	5.84729
	This study	63.9358	27.849	Mountain Jourdanne	plagioclase hosted melt inclusion	30I-2-1-17MI	-1.36612	5.02626
	This study	63.9358	27.849	Mountain Jourdanne	plagioclase hosted melt inclusion	30I-2-1-22MI	-1.37065	4.04456
	This study	63.9358	27.849	Mountain Jourdanne	plagioclase hosted melt inclusion	30I-2-1-1	-2.11817	4.8005
	This study	63.9358	27.849	Mountain Jourdanne	plagioclase hosted melt inclusion	30I-2-1-2	-2.22257	4.66238
	This study	63.9358	27.849	Mountain Jourdanne	plagioclase hosted melt inclusion	30I-2-1-3	-2.53293	4.9829
	This study	63.9358	27.849	Mountain Jourdanne	plagioclase hosted melt inclusion	30I-2-1-4	-2.81585	5.09897
	This study	63.9358	27.849	Mountain Jourdanne	plagioclase hosted melt inclusion	30I-2-1-5	-2.10068	4.62113
	This study	63.9358	27.849	Mountain Jourdanne	plagioclase hosted melt inclusion	30I-2-1-6-1	-2.38168	4.37461
	This study	63.9358	27.849	Mountain Jourdanne	plagioclase hosted melt inclusion	30I-2-1-6-2	-2.40043	5.4898
	This study	63.9358	27.849	Mountain Jourdanne	plagioclase hosted melt inclusion	30I-2-1-7	-2.0421	4.45289
	This study	63.9358	27.849	Mountain Jourdanne	plagioclase hosted melt inclusion	30I-2-1-8	-1.58545	5.79203
	This study	63.9358	27.849	Mountain Jourdanne	plagioclase hosted melt inclusion	30I-2-1-9-1	-2.38074	4.26628
	This study	63.9358	27.849	Mountain Jourdanne	plagioclase hosted melt inclusion	30I-2-1-9-2	-2.47425	4.21235
	This study	63.9358	27.849	Mountain Jourdanne	plagioclase hosted melt inclusion	30I-2-1-10	-2.18371	5.27059
	This study	63.9358	27.849	Mountain Jourdanne	plagioclase hosted melt inclusion	30I-2-1-10-2	-2.50932	6.10468
	This study	63.9358	27.849	Mountain Jourdanne	plagioclase hosted melt inclusion	30I-2-1-11	-2.82845	5.83156
	This study	63.9358	27.849	Mountain Jourdanne	plagioclase hosted melt inclusion	30I-2-1-12	-2.18129	5.08746
	This study	63.9358	27.849	Mountain Jourdanne	plagioclase hosted melt inclusion	30I-2-1-13	-3.19231	4.17371
	This study	63.9358	27.849	Mountain Jourdanne	plagioclase hosted melt inclusion	30I-2-1-14	-2.32347	4.76586
	This study	63.9358	27.849	Mountain Jourdanne	plagioclase hosted melt inclusion	30I-2-1-15	-2.0753	5.34554
	This study	63.9358	27.849	Mountain Jourdanne	plagioclase hosted melt inclusion	30I-2-1-16	-2.11052	4.19601
	This study	63.9358	27.849	Mountain Jourdanne	plagioclase hosted melt inclusion	30I-2-1-17	-2.90645	3.87775
	This study	63.9358	27.849	Mountain Jourdanne	plagioclase hosted melt inclusion	30I-2-1-18	-2.82496	4.40348
	This study	63.9358	27.849	Mountain Jourdanne	plagioclase hosted melt inclusion	30I-2-1-19	-2.91483	4.8632
	This study	63.9358	27.849	Mountain Jourdanne	plagioclase hosted melt inclusion	30I-2-1-20	-2.19618	5.8345
	This study	63.9358	27.849	Mountain Jourdanne	plagioclase hosted melt inclusion	30I-2-1-21	-3.28761	4.21203
	(l)	63.936	27.849	Mountain Jourdanne	plagioclase hosted melt inclusion	PUB-1-MI1	-2.6214	5.74916
	(l)	63.936	27.849	Mountain Jourdanne	plagioclase hosted melt inclusion	PUB-1-MI2	-2.5441	5.20218
	(l)	63.936	27.849	Mountain Jourdanne	plagioclase hosted melt inclusion	PUB-1-MI3	-2.54885	5.68868
	(l)	63.936	27.849	Mountain Jourdanne	plagioclase hosted melt inclusion	PUB-1-MI4	-2.53745	5.68849
	(l)	63.936	27.849	Mountain Jourdanne	plagioclase hosted melt inclusion	PUB-2-MI1	-1.88012	5.76894
	(l)	63.936	27.849	Mountain Jourdanne	plagioclase hosted melt inclusion	PUB-2-MI2	-2.12022	5.61242
	(j)	63.936	27.849	Mountain Jourdanne	plagioclase hosted melt inclusion	C1-1	-2.61061	5.49586
	(j)	63.936	27.849	Mountain Jourdanne	plagioclase hosted melt inclusion	C1-2	-2.63693	5.54926
	(j)	63.936	27.849	Mountain Jourdanne	plagioclase hosted melt inclusion	C1-2	-2.52601	5.39189
	(j)	63.936	27.849	Mountain Jourdanne	plagioclase hosted melt inclusion	C1-3	-2.25797	5.7665
	(j)	63.936	27.849	Mountain Jourdanne	plagioclase hosted melt inclusion	C1-3	-2.31693	5.97923
	(j)	63.936	27.849	Mountain Jourdanne	plagioclase hosted melt inclusion	C1-3	-2.13565	5.98107
	(j)	63.936	27.849	Mountain Jourdanne	plagioclase hosted melt inclusion	C1-4	-2.54237	5.69133
	(j)	63.936	27.849	Mountain Jourdanne	plagioclase hosted melt inclusion	C1-4	-2.53121	5.63211
	(j)	63.936	27.849	Mountain Jourdanne	plagioclase hosted melt inclusion	C1-6	-2.52177	5.21644
	(j)	63.936	27.849	Mountain Jourdanne	plagioclase hosted melt inclusion	C1-7	-1.80495	4.42178
	(j)	63.936	27.849	Mountain Jourdanne	plagioclase hosted melt inclusion	C1-7	-1.98886	5.28404
	(j)	63.936	27.849	Mountain Jourdanne	plagioclase hosted melt inclusion	C1-7	-2.17086	5.46843
	(j)	63.936	27.849	Mountain Jourdanne	plagioclase hosted melt inclusion	C1-7	-1.92333	5.44241
	(j)	63.936	27.849	Mountain Jourdanne	plagioclase hosted melt inclusion	C1-7	-2.05165	5.61882
	(j)	63.936	27.849	Mountain Jourdanne	plagioclase hosted melt inclusion	C1-8	-2.89885	4.51633
	(j)	63.936	27.849	Mountain Jourdanne	plagioclase hosted melt inclusion	C2-1	-2.12711	5.37706
	(j)	63.936	27.849	Mountain Jourdanne	plagioclase hosted melt inclusion	C2-2	-1.96485	5.64483
	(j)	63.936	27.849	Mountain Jourdanne	plagioclase hosted melt inclusion	C2-2	-2.17743	5.5507
	(j)	63.936	27.849	Mountain Jourdanne	plagioclase hosted melt inclusion	C2-4	-2.49646	5.04124
	(j)	63.936	27.849	Mountain Jourdanne	plagioclase hosted melt inclusion	C2-6	-2.0061	5.35336
	(j)	63.936	27.849	Mountain Jourdanne	plagioclase hosted melt inclusion	C2-6	-2.0107	4.88986
	(j)	63.936	27.849	Mountain Jourdanne	plagioclase hosted melt inclusion	C2-7	-2.05451	4.63551
	(j)	63.936	27.849	Mountain Jourdanne	plagioclase hosted melt inclusion	C2-7	-1.96442	5.22978
	(j)	63.936	27.849	Mountain Jourdanne	plagioclase hosted melt inclusion	C2-8	-2.13451	5.9467
	(j)	63.936	27.849	Mountain Jourdanne	plagioclase hosted melt inclusion	C2-8	-1.92885	5.21564
	(j)	63.936	27.849	Mountain Jourdanne	plagioclase hosted melt inclusion	C2-8	-2.09083	5.25406
	(j)	63.936	27.849	Mountain Jourdanne	plagioclase hosted melt inclusion	C2-8	-1.6786	5.37098
	(k)	69.689	-25.6542	SWIR	WHOLE ROCK	HAK9303-010-B30O	-0.542	4.26547	1.4
	(k)	69.689	-25.6542	SWIR	WHOLE ROCK	HAK9303-010-A10	-0.234	4.34299	1.4
	(k)	69.689	-25.6542	SWIR	WHOLE ROCK	HAK9303-010-A13	-0.296	3.42053	1.4
	(k)	69.689	-25.6542	SWIR	WHOLE ROCK	HAK9303-010-A16	-0.049	4.41597	1.4
	(k)	69.689	-25.6542	SWIR	WHOLE ROCK	HAK9303-010-A19	0.328			with excess CaO
	(k)	69.689	-25.6542	SWIR	GLASS	HAK9303-010-A2	-1.451	1.64004	1.4
	(k)	69.689	-25.6542	SWIR	WHOLE ROCK	HAK9303-010-A20	0.034			with excess CaO
	(k)	69.689	-25.6542	SWIR	GLASS	HAK9303-010-A3	-0.733	3.02149	1.4
	(k)	69.689	-25.6542	SWIR	WHOLE ROCK	HAK9303-010-A3	-0.306	3.40328	1.4
	(k)	69.689	-25.6542	SWIR	WHOLE ROCK	HAK9303-010-A5	-0.293	3.26118	1.4
	(k)	69.689	-25.6542	SWIR	WHOLE ROCK	HAK9303-010-A6	0.198			with excess CaO
	(k)	69.689	-25.6542	SWIR	WHOLE ROCK	HAK9303-010-A8	-0.479	6.24869	1.4
	(k)	69.689	-25.6542	SWIR	WHOLE ROCK	HAK9303-010-A9	-0.094	2.86045	1.4
	(k)	69.689	-25.6542	SWIR	GLASS	HAK9303-010-B1	-0.342	1.94094	1.4
	(k)	69.689	-25.6542	SWIR	WHOLE ROCK	HAK9303-010-B1	-0.345	4.85741	1.4
	(k)	69.689	-25.6542	SWIR	WHOLE ROCK	HAK9303-010-B11	-1.329	1.6049	1.4
	(k)	69.689	-25.6542	SWIR	WHOLE ROCK	HAK9303-010-B12	-0.051	3.06171	1.4
	(k)	69.689	-25.6542	SWIR	WHOLE ROCK	HAK9303-010-B14	-0.338	3.09768	1.4
	(k)	69.689	-25.6542	SWIR	WHOLE ROCK	HAK9303-010-B15	-0.36	4.20699	1.4
	(k)	69.689	-25.6542	SWIR	WHOLE ROCK	HAK9303-010-B16	-0.823	1.67871	1.4
	(k)	69.689	-25.6542	SWIR	WHOLE ROCK	HAK9303-010-B17	-0.092	3.31821	1.4
	(k)	69.689	-25.6542	SWIR	WHOLE ROCK	HAK9303-010-B18	-0.709	3.4102	1.4
	(k)	69.689	-25.6542	SWIR	WHOLE ROCK	HAK9303-010-B19	-0.126	4.26098	1.4
	(k)	69.689	-25.6542	SWIR	GLASS	HAK9303-010-B2	-1.015	1.9498	1.4
	(k)	69.689	-25.6542	SWIR	WHOLE ROCK	HAK9303-010-B2	-0.476	3.05471	1.4
	(k)	69.689	-25.6542	SWIR	WHOLE ROCK	HAK9303-010-B20	-0.298	5.08205	1.4
	(k)	69.689	-25.6542	SWIR	WHOLE ROCK	HAK9303-010-B21	-0.177	4.38407	1.4
	(k)	69.689	-25.6542	SWIR	WHOLE ROCK	HAK9303-010-B22	-0.194	4.34393	1.4
	(k)	69.689	-25.6542	SWIR	WHOLE ROCK	HAK9303-010-B23	-0.39	2.99991	1.4
	(k)	69.689	-25.6542	SWIR	WHOLE ROCK	HAK9303-010-B24	0.086			with excess CaO
	(k)	69.689	-25.6542	SWIR	WHOLE ROCK	HAK9303-010-B25	-0.229	3.17166	1.4
	(k)	69.689	-25.6542	SWIR	WHOLE ROCK	HAK9303-010-B26	-0.395	2.95463	1.4
	(k)	69.689	-25.6542	SWIR	WHOLE ROCK	HAK9303-010-B27	0.251			with excess CaO
	(k)	69.689	-25.6542	SWIR	WHOLE ROCK	HAK9303-010-B28	0.53			with excess CaO
	(k)	69.689	-25.6542	SWIR	WHOLE ROCK	HAK9303-010-B29	-0.453	4.10115	1.4
	(k)	69.689	-25.6542	SWIR	WHOLE ROCK	HAK9303-010-B29O	-0.373	4.47366	1.4
	(k)	69.689	-25.6542	SWIR	WHOLE ROCK	HAK9303-010-B3	-0.287	2.96396	1.4
	(k)	69.689	-25.6542	SWIR	WHOLE ROCK	HAK9303-010-B30	-0.443	3.26866	1.4
	(k)	69.689	-25.6542	SWIR	WHOLE ROCK	HAK9303-010-B31	-0.607	1.91116	1.4
	(k)	69.689	-25.6542	SWIR	WHOLE ROCK	HAK9303-010-B31O	-0.824	1.93791	1.4
	(k)	69.689	-25.6542	SWIR	WHOLE ROCK	HAK9303-010-B32	-0.069	5.08152	1.4
	(k)	69.689	-25.6542	SWIR	WHOLE ROCK	HAK9303-010-B32O	-0.037	6.06899	1.4
	(k)	69.689	-25.6542	SWIR	WHOLE ROCK	HAK9303-010-B33	-0.28	2.86917	1.4
	(k)	69.689	-25.6542	SWIR	WHOLE ROCK	HAK9303-010-B34	-0.929	8.52178	1.4
	(k)	69.689	-25.6542	SWIR	WHOLE ROCK	HAK9303-010-B35	-0.06	4.29389	1.4
	(k)	69.689	-25.6542	SWIR	WHOLE ROCK	HAK9303-010-B37	-0.036	5.21218	1.4
	(k)	69.689	-25.6542	SWIR	WHOLE ROCK	HAK9303-010-B38	-0.958	2.61743	1.4
	(k)	69.689	-25.6542	SWIR	WHOLE ROCK	HAK9303-010-B39	-0.645	2.73695	1.4
	(k)	69.689	-25.6542	SWIR	WHOLE ROCK	HAK9303-010-B4	-0.348	3.16157	1.4
	(k)	69.689	-25.6542	SWIR	WHOLE ROCK	HAK9303-010-B40	-1.944	8.61344	1.4
	(k)	69.689	-25.6542	SWIR	WHOLE ROCK	HAK9303-010-B41	0.277			with excess CaO
	(k)	69.689	-25.6542	SWIR	WHOLE ROCK	HAK9303-010-B42	0.7			with excess CaO
	(k)	69.689	-25.6542	SWIR	WHOLE ROCK	HAK9303-010-B43	-0.412	3.17069	1.4
	(k)	69.689	-25.6542	SWIR	WHOLE ROCK	HAK9303-010-B44	0.071			with excess CaO
	(k)	69.689	-25.6542	SWIR	WHOLE ROCK	HAK9303-010-B45	-1.045	3.54141	1.4
	(k)	69.689	-25.6542	SWIR	WHOLE ROCK	HAK9303-010-B46	0.539			with excess CaO
	(k)	69.689	-25.6542	SWIR	WHOLE ROCK	HAK9303-010-B47	-0.083	5.74481	1.4
	(k)	69.689	-25.6542	SWIR	WHOLE ROCK	HAK9303-010-B48	-0.263	6.03524	1.4
	(k)	69.689	-25.6542	SWIR	WHOLE ROCK	HAK9303-010-B49	-1.218	8.49071	1.4
	(k)	69.689	-25.6542	SWIR	WHOLE ROCK	HAK9303-010-B5	-0.829	2.68632	1.4
	(k)	69.689	-25.6542	SWIR	WHOLE ROCK	HAK9303-010-B50	-0.437	2.94373	1.4
	(k)	69.689	-25.6542	SWIR	WHOLE ROCK	HAK9303-010-B51	-0.313	4.23785	1.4
	(k)	69.689	-25.6542	SWIR	WHOLE ROCK	HAK9303-010-B52	-0.319	3.11981	1.4
	(k)	69.689	-25.6542	SWIR	WHOLE ROCK	HAK9303-010-B53	-0.621	3.49558	1.4
	(k)	69.689	-25.6542	SWIR	WHOLE ROCK	HAK9303-010-B54	0.584			with excess CaO
	(k)	69.689	-25.6542	SWIR	WHOLE ROCK	HAK9303-010-B55	0.313			with excess CaO
	(k)	69.689	-25.6542	SWIR	WHOLE ROCK	HAK9303-010-B56	-1.182	7.98466	1.4
	(k)	69.689	-25.6542	SWIR	WHOLE ROCK	HAK9303-010-B57	-0.222	3.12409	1.4
	(k)	69.689	-25.6542	SWIR	WHOLE ROCK	HAK9303-010-B6	-0.069	4.12954	1.4
	(k)	69.689	-25.6542	SWIR	WHOLE ROCK	HAK9303-010-B7	-0.844	2.3034	1.4
	(k)	69.689	-25.6542	SWIR	WHOLE ROCK	HAK9303-010-B8	-0.549	5.64327	1.4
	(k)	69.689	-25.6542	SWIR	WHOLE ROCK	HAK9303-010-B9	-0.351	4.00307	1.4
	(k)	69.689	-25.6542	SWIR	GLASS	HAK9303-010-C1	-0.238	3.15172	1.4
	(k)	69.689	-25.6542	SWIR	WHOLE ROCK	HAK9303-010-C1	-3.363	11.1512	1.4
	(k)	69.689	-25.6542	SWIR	WHOLE ROCK	HAK9303-010-C10	-2.364	10.9848	1.4
	(k)	69.689	-25.6542	SWIR	WHOLE ROCK	HAK9303-010-C11	-5.769	15.8186	1.4
	(k)	69.689	-25.6542	SWIR	WHOLE ROCK	HAK9303-010-C12	-1.295	7.48014	1.4
	(k)	69.689	-25.6542	SWIR	WHOLE ROCK	HAK9303-010-C14	-0.209	5.77183	1.4
	(k)	69.689	-25.6542	SWIR	WHOLE ROCK	HAK9303-010-C16	-0.383	6.72062	1.4
	(k)	69.689	-25.6542	SWIR	WHOLE ROCK	HAK9303-010-C15	-1.466	2.84308	1.4
	(k)	69.689	-25.6542	SWIR	WHOLE ROCK	HAK9303-010-C17	-1.001	4.51849	1.4
	(k)	69.689	-25.6542	SWIR	WHOLE ROCK	HAK9303-010-C18	-2.446	13.925	1.4
	(k)	69.689	-25.6542	SWIR	WHOLE ROCK	HAK9303-010-C19	-0.782	7.20857	1.4
	(k)	69.689	-25.6542	SWIR	WHOLE ROCK	HAK9303-010-C2	-0.647	5.27747	1.4
	(k)	69.689	-25.6542	SWIR	WHOLE ROCK	HAK9303-010-C20	-1.202	5.62318	1.4
	(k)	69.689	-25.6542	SWIR	WHOLE ROCK	HAK9303-010-C21	-8.231	16.1148	1.4
	(k)	69.689	-25.6542	SWIR	WHOLE ROCK	HAK9303-010-C22	-1.448	7.80934	1.4
	(k)	69.689	-25.6542	SWIR	WHOLE ROCK	HAK9303-010-C23	-0.355	9.08768	1.4
	(k)	69.689	-25.6542	SWIR	WHOLE ROCK	HAK9303-010-C24	-1.992	7.15428	1.4
	(k)	69.689	-25.6542	SWIR	WHOLE ROCK	HAK9303-010-C25	-1.06	3.65052	1.4
	(k)	69.689	-25.6542	SWIR	WHOLE ROCK	HAK9303-010-C26	-4.225	9.85025	1.4
	(k)	69.689	-25.6542	SWIR	WHOLE ROCK	HAK9303-010-C27	0.1			with excess CaO
	(k)	69.689	-25.6542	SWIR	WHOLE ROCK	HAK9303-010-C28	-2.912	5.8473	1.4
	(k)	69.689	-25.6542	SWIR	WHOLE ROCK	HAK9303-010-C29	-0.487	3.88196	1.4
	(k)	69.689	-25.6542	SWIR	WHOLE ROCK	HAK9303-010-C3	-0.718	6.39008	1.4
	(k)	69.689	-25.6542	SWIR	WHOLE ROCK	HAK9303-010-C30	-0.521	3.65204	1.4
	(k)	69.689	-25.6542	SWIR	WHOLE ROCK	HAK9303-010-C31	-0.124	7.28767	1.4
	(k)	69.689	-25.6542	SWIR	WHOLE ROCK	HAK9303-010-C32	-0.663	5.02075	1.4
	(k)	69.689	-25.6542	SWIR	WHOLE ROCK	HAK9303-010-C33	-4.683	13.2082	1.4
	(k)	69.689	-25.6542	SWIR	WHOLE ROCK	HAK9303-010-C34	-8.947	12.1606	1.4
	(k)	69.689	-25.6542	SWIR	WHOLE ROCK	HAK9303-010-C35	-1.154	4.81714	1.4
	(k)	69.689	-25.6542	SWIR	WHOLE ROCK	HAK9303-010-C37	-3.56	6.98695	1.4
	(k)	69.689	-25.6542	SWIR	WHOLE ROCK	HAK9303-010-C36	-1.298	6.32247	1.4
	(k)	69.689	-25.6542	SWIR	WHOLE ROCK	HAK9303-010-C38	0.422			with excess CaO
	(k)	69.689	-25.6542	SWIR	WHOLE ROCK	HAK9303-010-C38O	-4.383	10.2714	1.4
	(k)	69.689	-25.6542	SWIR	WHOLE ROCK	HAK9303-010-C39	-1.892	12.0334	1.4
	(k)	69.689	-25.6542	SWIR	WHOLE ROCK	HAK9303-010-C4	-2.059	6.38936	1.4
	(k)	69.689	-25.6542	SWIR	WHOLE ROCK	HAK9303-010-C40	-7.626	13.8366	1.4
	(k)	69.689	-25.6542	SWIR	WHOLE ROCK	HAK9303-010-C41	-8.734	17.9201	1.4
	(k)	69.689	-25.6542	SWIR	WHOLE ROCK	HAK9303-010-C42	-1.853	7.95761	1.4
	(k)	69.689	-25.6542	SWIR	WHOLE ROCK	HAK9303-010-C43	-1.95	8.02935	1.4
	(k)	69.689	-25.6542	SWIR	WHOLE ROCK	HAK9303-010-C45	-0.704	6.10613	1.4
	(k)	69.689	-25.6542	SWIR	WHOLE ROCK	HAK9303-010-C46	0.435			with excess CaO
	(k)	69.689	-25.6542	SWIR	WHOLE ROCK	HAK9303-010-C5	-0.633	9.77386	1.4
	(k)	69.689	-25.6542	SWIR	WHOLE ROCK	HAK9303-010-C6	-0.488	4.50865	1.4
	(k)	69.689	-25.6542	SWIR	WHOLE ROCK	HAK9303-010-C7	-7.475	15.2243	1.4
	(k)	69.689	-25.6542	SWIR	WHOLE ROCK	HAK9303-010-C8	-1.628	3.29286	1.4
	(k)	69.689	-25.6542	SWIR	WHOLE ROCK	HAK9303-010-C9	-0.586	6.48517	1.4
	(k)	69.689	-25.6542	SWIR	GLASS	HAK9303-010-D1	-1.068	2.32592	1.4
	(k)	69.689	-25.6542	SWIR	GLASS	HAK9303-010-A1	-0.79	1.42063	1.4
	(k)	69.689	-25.6542	SWIR	WHOLE ROCK	HAK9303-010-A1	-0.299	3.51029	1.4
	(k)	69.689	-25.6542	SWIR	WHOLE ROCK	HAK9303-010-A11	-0.176	4.39981	1.4
	(k)	69.689	-25.6542	SWIR	WHOLE ROCK	HAK9303-010-A12	0.021			with excess CaO
	(k)	69.689	-25.6542	SWIR	WHOLE ROCK	HAK9303-010-A14	-0.155	4.61039	1.4
	(k)	69.689	-25.6542	SWIR	WHOLE ROCK	HAK9303-010-A15	-1.127	3.11216	1.4
	(k)	69.689	-25.6542	SWIR	WHOLE ROCK	HAK9303-010-A17	1.014			with excess CaO
	(k)	69.689	-25.6542	SWIR	WHOLE ROCK	HAK9303-010-A18	-0.244	3.75359	1.4
	(k)	69.689	-25.6542	SWIR	WHOLE ROCK	HAK9303-010-A2	-0.176	4.11175	1.4
	(k)	69.689	-25.6542	SWIR	GLASS	HAK9303-010-A4	-1.565	1.76281	1.4
	(k)	69.689	-25.6542	SWIR	WHOLE ROCK	HAK9303-010-A4	-0.459	3.04003	1.4
	(k)	69.689	-25.6542	SWIR	WHOLE ROCK	HAK9303-010-A7	0.263			with excess CaO
	(k)	69.689	-25.6542	SWIR	WHOLE ROCK	HAK9303-010-B10	-0.258	3.36239	1.4
	(k)	69.689	-25.6542	SWIR	WHOLE ROCK	HAK9303-010-B13	-0.106	3.42419	1.4
	(k)	56.88	-32.82	SWIR	WHOLE ROCK	HUD1966-014-028	-1.213	1.51383	1.4
	(k)	56.88	-32.82	SWIR	WHOLE ROCK	HUD1966-033-009	-2.352	6.42468	1.4
	(k)	67.45	-26.47	SWIR	WHOLE ROCK	HUD1980-005-003	0.108			with excess CaO
	(k)	56.781	-33.655	SWIR	GLASS	CON2709-001-001	-0.789	1.06051	1.4
	(k)	6.485	-54.043	SWIR	WHOLE ROCK	ISL1176-060-001	-4.632	7.54695	1.4
	(k)	11.362	-52.9	SWIR	WHOLE ROCK	ISL1176-075-002	-2.794	0.814757	1.4
	(k)	6.485	-54.043	SWIR	WHOLE ROCK	ISL1176-060-002	-2.523	3.85499	1.4
	(k)	6.485	-54.043	SWIR	WHOLE ROCK	ISL1176-060-003	-3.443	2.88068	1.4
	(k)	11.362	-52.9	SWIR	WHOLE ROCK	ISL1176-075-003	-2.914	0.686015	1.4
	(k)	57.2849	-32.8192	SWIR	WHOLE ROCK	JCR0031-003-011	-2.973	9.49994	1.4
	(k)	57.2849	-32.8192	SWIR	WHOLE ROCK	JCR0031-003-030	-3.439	9.86745	1.4
	(k)	57.2849	-32.8192	SWIR	WHOLE ROCK	JCR0031-003-049	-1.621	8.32092	1.4
	(k)	57.2849	-32.8192	SWIR	WHOLE ROCK	JCR0031-003-051	-0.87	4.79336	1.4
	(k)	57.2811	-32.954	SWIR	WHOLE ROCK	JCR0031-010-007	-2.744	6.01808	1.4
	(k)	57.2811	-32.954	SWIR	WHOLE ROCK	JCR0031-010-013	-1.306	5.35675	1.4
	(k)	57.2811	-32.954	SWIR	WHOLE ROCK	JCR0031-010-014	-0.909	3.30487	1.4
	(k)	57.28	-32.73	SWIR	WHOLE ROCK	JCR0031-017-007	-3.514	12.8221	1.4
	(k)	57.17	-32.7	SWIR	WHOLE ROCK	JCR0031-028-041	0.881			with excess CaO
	(k)	57.2118	-32.7507	SWIR	WHOLE ROCK	JCR0031-029-001	-3.251	2.90769	1.4
	(k)	57.1785	-32.7953	SWIR	WHOLE ROCK	JCR0031-041-005	-2.135	3.07469	1.4
	(k)	57.22	-32.72	SWIR	WHOLE ROCK	JCR0031-043-001	-1.35	6.00625	1.4
	(k)	57.19	-32.52	SWIR	WHOLE ROCK	JCR0031-047-002	-2.402	2.68168	1.4
	(k)	57.19	-32.52	SWIR	WHOLE ROCK	JCR0031-047-004	-2.76	2.08017	1.4
	(k)	57.19	-32.52	SWIR	WHOLE ROCK	JCR0031-047-005	-2.495	3.01742	1.4
	(k)	57.19	-32.52	SWIR	WHOLE ROCK	JCR0031-047-010	-1.726	2.71772	1.4
	(k)	57.23	-32.58	SWIR	WHOLE ROCK	JCR0031-050-001	-2.145	3.61706	1.4
	(k)	57.28	-32.74	SWIR	WHOLE ROCK	JCR0031-BG013-001/002-008	-1.528	4.07504	1.4
	(k)	57.28	-32.7	SWIR	WHOLE ROCK	JCR0031-BR003-001/057-060	-0.909	0.42486	1.4
	(k)	57.26	-32.73	SWIR	WHOLE ROCK	JCR0031-BR010-001-005	-0.885	3.72188	1.4
	(k)	57.26	-32.73	SWIR	WHOLE ROCK	JCR0031-BR010-001-005	-0.562603	3.30677	1.4
	(k)	57.29	-32.67	SWIR	WHOLE ROCK	JCR0031-ROPOS-425 G3-2	-1.32356	1.99231	1.4
	(k)	57.27	-32.73	SWIR	WHOLE ROCK	JCR0031-ROPOS-426-D1	-0.000361	4.94679	1.4
	(k)	57.28	-32.74	SWIR	WHOLE ROCK	JCR0031-ROPOS-434-1A	-1.2243	3.57281	1.4
	(k)	57.2849	-32.8192	SWIR	WHOLE ROCK	JCR0031-003-010	-4.42	7.93197	1.4
	(k)	57.2811	-32.954	SWIR	WHOLE ROCK	JCR0031-010-008	-1.731	9.04515	1.4
	(k)	57.2811	-32.954	SWIR	WHOLE ROCK	JCR0031-010-008	-1.31639	9.01369	1.4
	(k)	40.653	-43.893	SWIR	GLASS	DUF0034-005	-0.669	2.12334	1.4
	(k)	49.882	-37.71	SWIR	GLASS	DUF0034-003	0.03			with excess CaO
	(k)	49.882	-37.71	SWIR	GLASS	DUF0034-003	-0.14919	1.84639	1.4
	(k)	70.323	-25.864	SWIR	GLASS	DUF0023-004	-1.6	6.41651	1.4
	(k)	70.323	-25.864	SWIR	GLASS	DUF0023-004	-1.265	5.46226	1.4
	(k)	43.7	-40.98	SWIR	GLASS	DUF0034-004	-1.618	1.59072	1.4
	(k)	36.302	-44.807	SWIR	WHOLE ROCK	DUF0034-007	-0.876	0.0433097	1.4
	(k)	68.73	-26.09	SWIR	GLASS	DUF0107-001-001-005	-1.701	5.47477	1.4
	(k)	68.73	-26.09	SWIR	GLASS	DUF0107-001-001-008	-2.421	5.50555	1.4
	(k)	68.44	-26.23	SWIR	GLASS	DUF0107-002-001-001	-1.77	6.40734	1.4
	(k)	67.979	-26.488	SWIR	GLASS	DUF0107-003	-1.534	3.84104	1.4
	(k)	50.47	-37.66	SWIR	WHOLE ROCK	DY0115-020-004-007	-0.21	6.32416	1.4
	(k)	67.23	-26.98	SWIR	GLASS	DUF0107-006-004-001	-1.773	7.04914	1.4
	(k)	67.23	-26.98	SWIR	GLASS	DUF0107-006-005-003	-1.946	6.39289	1.4
	(k)	66.64	-27.36	SWIR	WHOLE ROCK	DUF0107-007-002-001	-1.57	6.55716	1.4
	(k)	66.64	-27.36	SWIR	WHOLE ROCK	DUF0107-007-002-002	-1.676	7.1978	1.4
	(k)	66.64	-27.36	SWIR	WHOLE ROCK	DUF0107-007-002-004	-1.571	7.24293	1.4
	(k)	66.64	-27.36	SWIR	WHOLE ROCK	DUF0107-007-002-005	-1.6	7.46621	1.4
	(k)	66.64	-27.36	SWIR	WHOLE ROCK	DUF0107-007-002-011	-1.5	7.47328	1.4
	(k)	66.64	-27.36	SWIR	WHOLE ROCK	DUF0107-007-002-012	-1.508	7.17525	1.4
	(k)	66.34	-27.34	SWIR	WHOLE ROCK	DUF0107-008	-1.688	3.94325	1.4
	(k)	66.34	-27.34	SWIR	GLASS	DUF0107-008-001-002	-2.132	5.25389	1.4
	(k)	66.34	-27.34	SWIR	WHOLE ROCK	DUF0107-008-001-002	-1.905	5.14358	1.4
	(k)	66.34	-27.34	SWIR	GLASS	DUF0107-008-002	-2.069	6.04812	1.4
	(k)	66.26	-27.44	SWIR	GLASS	DUF0107-009-003-001	-2.255	5.61109	1.4
	(k)	65.98	-27.57	SWIR	WHOLE ROCK	DUF0107-010-001-003	-1.592	5.70794	1.4
	(k)	65.98	-27.57	SWIR	WHOLE ROCK	DUF0107-010-001-004	-1.685	6.91859	1.4
	(k)	65.98	-27.57	SWIR	WHOLE ROCK	DUF0107-010-001-005	-1.173	4.77961	1.4
	(k)	65.53	-27.63	SWIR	WHOLE ROCK	DUF0107-011-001-005	-2.354	5.0606	1.4
	(k)	65.98	-27.57	SWIR	WHOLE ROCK	DUF0107-010-003-016	-1.628	5.64921	1.4
	(k)	65.53	-27.63	SWIR	WHOLE ROCK	DUF0107-011-002-007	-2.296	4.29365	1.4
	(k)	65.53	-27.63	SWIR	WHOLE ROCK	DUF0107-011-001-001	-2.311	4.99941	1.4
	(k)	65.53	-27.63	SWIR	WHOLE ROCK	DUF0107-011-001-002	-2.314	5.37143	1.4
	(k)	65.53	-27.63	SWIR	WHOLE ROCK	DUF0107-011-001-003	-2.2	4.98253	1.4
	(k)	65.53	-27.63	SWIR	WHOLE ROCK	DUF0107-011-001-004	-2.309	5.5348	1.4
	(k)	65.35	-27.74	SWIR	WHOLE ROCK	DUF0107-012-001-002	-1.634	6.22827	1.4
	(k)	65.53	-27.63	SWIR	WHOLE ROCK	DUF0107-011-001-009	-2.313	5.2062	1.4
	(k)	65.53	-27.63	SWIR	WHOLE ROCK	DUF0107-011-001-010	-2.454	5.41506	1.4
	(k)	65.53	-27.63	SWIR	WHOLE ROCK	DUF0107-011-002-010	-2.099	3.83726	1.4
	(k)	65.35	-27.74	SWIR	GLASS	DUF0107-012	-1.634	6.23393	1.4
	(k)	65.35	-27.74	SWIR	WHOLE ROCK	DUF0107-012-001-001	-1.488	6.21632	1.4
	(k)	65.35	-27.74	SWIR	GLASS	DUF0107-012-001-002	-1.761	7.1024	1.4
	(k)	65.35	-27.74	SWIR	GLASS	DUF0107-012-001-002	-1.634	6.22827	1.4
	(k)	65.35	-27.74	SWIR	GLASS	DUF0107-012-002	-1.486	6.71342	1.4
	(k)	65.35	-27.74	SWIR	WHOLE ROCK	DUF0107-012-002	-1.486	6.71342	1.4
	(k)	65.35	-27.74	SWIR	WHOLE ROCK	DUF0107-012-002-001	-1.295	6.24758	1.4
	(k)	65.35	-27.74	SWIR	GLASS	DUF0107-012-002-002	-1.661	6.28967	1.4
	(k)	65.35	-27.74	SWIR	WHOLE ROCK	DUF0107-012-002-002	-1.661	6.26703	1.4
	(k)	65.35	-27.74	SWIR	WHOLE ROCK	DUF0107-012-003-001	-1.701	6.42156	1.4
	(k)	65.35	-27.74	SWIR	WHOLE ROCK	DUF0107-012-003-002	-1.648	6.32369	1.4
	(k)	65.42	-27.78	SWIR	WHOLE ROCK	DUF0107-013-003-002	-2.533	5.31517	1.4
	(k)	65.42	-27.78	SWIR	WHOLE ROCK	DUF0107-013-003-001	-1.594	5.94966	1.4
	(k)	65.42	-27.78	SWIR	WHOLE ROCK	DUF0107-013-003-004	-2.56	5.86505	1.4
	(k)	63.91	-27.85	SWIR	GLASS	DUF0107-016	-1.487	4.62656	1.4
	(k)	63.91	-27.85	SWIR	WHOLE ROCK	DUF0107-016	-1.304	4.2412	1.4
	(k)	63.91	-27.85	SWIR	WHOLE ROCK	DUF0107-016-001-001	-0.813	4.2893	1.4
	(k)	63.91	-27.85	SWIR	GLASS	DUF0107-016-002-001	-1.598	4.03904	1.4
	(k)	63.91	-27.85	SWIR	WHOLE ROCK	DUF0107-016-002-001	-1.389	4.45889	1.4
	(k)	63.91	-27.85	SWIR	WHOLE ROCK	DUF0107-016-002-003	-1.307	4.49644	1.4
	(k)	63.91	-27.85	SWIR	WHOLE ROCK	DUF0107-016-003-001	-1.392	4.77966	1.4
	(k)	63.87	-27.8	SWIR	WHOLE ROCK	DUF0107-017	-1.018	3.28491	1.4
	(k)	63.75	-27.86	SWIR	WHOLE ROCK	DUF0107-019-001-002	-1.431	4.54444	1.4
	(k)	63.75	-27.86	SWIR	GLASS	DUF0107-019-001-003	-1.347	4.91715	1.4
	(k)	63.75	-27.86	SWIR	GLASS	DUF0107-019-001-003	-1.531	4.61787	1.4
	(k)	63.75	-27.86	SWIR	WHOLE ROCK	DUF0107-019-001-003	-1.366	4.47961	1.4
	(k)	63.75	-27.86	SWIR	WHOLE ROCK	DUF0107-019-001-005	-1.588	4.55687	1.4
	(k)	63.75	-27.86	SWIR	WHOLE ROCK	DUF0107-019-001-007	-1.609	4.74437	1.4
	(k)	61.32	-28.95	SWIR	GLASS	DUF0107-029-001-002	-1.954	7.7506	1.4
	(k)	63.36	-28.11	SWIR	GLASS	DUF0107-022-001-001	-1.728	8.04106	1.4
	(k)	63.36	-28.11	SWIR	WHOLE ROCK	DUF0107-022-001-001	-1.668	8.95687	1.4
	(k)	63.36	-28.11	SWIR	WHOLE ROCK	DUF0107-022-001-002	-1.751	7.91465	1.4
	(k)	63.36	-28.11	SWIR	WHOLE ROCK	DUF0107-022-001-003	-1.7	8.6205	1.4
	(k)	63.36	-28.11	SWIR	WHOLE ROCK	DUF0107-022-002-001	-1.567	7.88308	1.4
	(k)	63.36	-28.11	SWIR	WHOLE ROCK	DUF0107-022-002-002	-3.81	5.65411	1.4
	(k)	54.65	-34.73	SWIR	GLASS	DUF0107-063-001	-2.417	3.33683	1.4
	(k)	61.93	-28.8	SWIR	WHOLE ROCK	DUF0107-026	-1.694	8.9137	1.4
	(k)	61.93	-28.8	SWIR	GLASS	DUF0107-026-001	-1.374	8.32838	1.4
	(k)	61.93	-28.8	SWIR	WHOLE ROCK	DUF0107-026-001-001	-1.249	8.4104	1.4
	(k)	61.93	-28.8	SWIR	WHOLE ROCK	DUF0107-026-001-002	-1.21	8.11731	1.4
	(k)	61.93	-28.8	SWIR	WHOLE ROCK	DUF0107-026-002-001	-0.992	7.89556	1.4
	(k)	61.93	-28.8	SWIR	WHOLE ROCK	DUF0107-026-003-001	-1.126	8.02165	1.4
	(k)	61.64	-28.94	SWIR	GLASS	DUF0107-027	-2.157	4.1122	1.4
	(k)	61.64	-28.94	SWIR	GLASS	DUF0107-027-001-001	-2.026	6.34028	1.4
	(k)	61.64	-28.94	SWIR	WHOLE ROCK	DUF0107-027-001-001	-2.026	6.34028	1.4
	(k)	61.64	-28.94	SWIR	WHOLE ROCK	DUF0107-027-001-002	-1.897	6.29807	1.4
	(k)	61.44	-28.95	SWIR	GLASS	DUF0107-028	-1.632	3.82452	1.4
	(k)	61.44	-28.95	SWIR	WHOLE ROCK	DUF0107-028	-1.95	4.52941	1.4
	(k)	61.44	-28.95	SWIR	WHOLE ROCK	DUF0107-028-002-004	-1.79	5.14083	1.4
	(k)	61.44	-28.95	SWIR	WHOLE ROCK	DUF0107-028-002-005	-1.813	3.61695	1.4
	(k)	61.32	-28.95	SWIR	WHOLE ROCK	DUF0107-029-001-001	-1.797	7.00492	1.4
	(k)	61.32	-28.95	SWIR	WHOLE ROCK	DUF0107-029-001-002	-1.809	7.38625	1.4
	(k)	61.32	-28.95	SWIR	WHOLE ROCK	DUF0107-029-002-001	-1.656	6.00053	1.4
	(k)	61.32	-28.95	SWIR	WHOLE ROCK	DUF0107-029-003-001	-1.725	6.32343	1.4
	(k)	61.32	-28.95	SWIR	GLASS	DUF0107-029-003-002	-1.85	6.35529	1.4
	(k)	61.32	-28.95	SWIR	WHOLE ROCK	DUF0107-029-003-002	-1.85	6.35529	1.4
	(k)	61.32	-28.95	SWIR	GLASS	DUF0107-029-003-003	-1.663	6.34882	1.4
	(k)	61.32	-28.95	SWIR	WHOLE ROCK	DUF0107-029-003-003	-1.663	6.34882	1.4
	(k)	60.16	-30.44	SWIR	GLASS	DUF0107-034-001-001	-1.16	4.14782	1.4
	(k)	60.16	-30.44	SWIR	GLASS	DUF0107-034-001-002	-1.243	4.95579	1.4
	(k)	59.91	-30.52	SWIR	GLASS	DUF0107-035-004	-1.358	4.51634	1.4
	(k)	59.16	-30.92	SWIR	GLASS	DUF0107-041-001-001	-2.405	3.72156	1.4
	(k)	59.16	-30.92	SWIR	GLASS	DUF0107-041-001-002	-2.327	3.66446	1.4
	(k)	58.61	-31.19	SWIR	GLASS	DUF0107-046-001-006	-0.868	4.79654	1.4
	(k)	57.74	-31.73	SWIR	GLASS	DUF0107-049-001	-1.389	3.23898	1.4
	(k)	57.74	-31.73	SWIR	GLASS	DUF0107-049-001-001	-1.559	3.31498	1.4
	(k)	56.03	-33.87	SWIR	GLASS	DUF0107-053-002-001	-0.55	6.0474	1.4
	(k)	56.03	-33.87	SWIR	GLASS	DUF0107-053-002-003	-0.626	6.03863	1.4
	(k)	55.78	-33.96	SWIR	GLASS	DUF0107-055-002-001	-2.143	3.37369	1.4
	(k)	55.13	-34.36	SWIR	GLASS	DUF0107-061	-2.201	3.46474	1.4
	(k)	54.65	-34.73	SWIR	GLASS	DUF0107-063-001	-2.101	3.83235	1.4
	(k)	53.89	-35.34	SWIR	GLASS	DUF0107-068	-1.791	2.85066	1.4
	(k)	53.89	-35.34	SWIR	GLASS	DUF0107-068-001-007	-2.054	3.68829	1.4
	(k)	14.601	-52.104	SWIR	GLASS	KNO0162-9-061-071	-5.02	2.28814	1.4
	(k)	51.81	-37.33	SWIR	GLASS	DUF0107-070-001-001	-0.719	0.952314	1.4
	(k)	51.16	-37.46	SWIR	GLASS	DUF0107-072-001-002	-1.207	3.04018	1.4
	(k)	49.34	-37.87	SWIR	GLASS	DUF0107-075	-1.199	0.89272	1.4
	(k)	49.34	-37.87	SWIR	GLASS	DUF0107-075-001-001	-1.012	1.94843	1.4
	(k)	49.77	-37.79	SWIR	GLASS	DUF0107-076-002-003	-0.889	1.99362	1.4
	(k)	40.8	-43.89	SWIR	GLASS	DUF0125-017-001	1.132			with excess CaO
	(k)	62.36	-28.54	SWIR	WHOLE ROCK	DUF183-016-003-004	-2.12	6.88652	1.4
	(k)	62.36	-28.54	SWIR	WHOLE ROCK	DUF183-016-003-005	-2.148	6.94139	1.4
	(k)	62.36	-28.54	SWIR	WHOLE ROCK	DUF183-016-003-007	-2.047	6.91251	1.4
	(k)	62.36	-28.54	SWIR	WHOLE ROCK	DUF183-016-003-009	-2.108	6.73631	1.4
	(k)	62.36	-28.54	SWIR	WHOLE ROCK	DUF183-016-003-014	-2.042	6.68889	1.4
	(k)	64.06	-27.51	SWIR	WHOLE ROCK	DUF183-019-004-001	-1.838	5.68944	1.4
	(k)	64.06	-27.51	SWIR	WHOLE ROCK	DUF183-019-004-004	-1.865	5.75378	1.4
	(k)	64.63	-28.23	SWIR	WHOLE ROCK	DUF183-023-002-002	-1.881	5.80881	1.4
	(k)	64.63	-28.23	SWIR	WHOLE ROCK	DUF183-023-002-010	-1.825	5.71781	1.4
	(k)	64.63	-28.23	SWIR	WHOLE ROCK	DUF183-023-002-011	-1.927	5.38025	1.4
	(k)	64.54	-28.19	SWIR	WHOLE ROCK	DUF183-024-002-003	-2.304	4.69165	1.4
	(k)	64.54	-28.19	SWIR	WHOLE ROCK	DUF183-024-002-006	-2.375	4.67943	1.4
	(k)	64.65	-28.15	SWIR	WHOLE ROCK	DUF183-026-003-001	-2.432	4.55639	1.4
	(k)	64.65	-28.15	SWIR	WHOLE ROCK	DUF183-026-003-002	-2.444	4.52642	1.4
	(k)	64.63	-27.96	SWIR	WHOLE ROCK	DUF183-028-003-003	-1.959	6.22004	1.4
	(k)	64.55	-27.38	SWIR	WHOLE ROCK	DUF183-031-002-004	-3.206	3.24701	1.4
	(k)	64.44	-27.93	SWIR	WHOLE ROCK	DY0115-017-001	-2.29	6.20034	1.4
	(k)	64.44	-27.93	SWIR	WHOLE ROCK	DY0115-017-002	-2.278	6.05638	1.4
	(k)	49.65	-37.77	SWIR	WHOLE ROCK	DY0115-017-002A	-1.021	1.25701	1.4
	(k)	49.64	-37.77	SWIR	WHOLE ROCK	DY0115-017-003	-1.123	2.39998	1.4
	(k)	49.64	-37.77	SWIR	WHOLE ROCK	DY0115-017-004	-1.026	2.07274	1.4
	(k)	59.11	-31.09	SWIR	WHOLE ROCK	DY0115-017-004A	-2.07	2.36959	1.4
	(k)	49.64	-37.77	SWIR	WHOLE ROCK	DY0115-017-005	-1.117	2.33675	1.4
	(k)	63.94	-27.84	SWIR	WHOLE ROCK	DY0115-017-005A	-1.862	0.712504	1.4
	(k)	63.94	-27.85	SWIR	WHOLE ROCK	DY0115-017-006	-2.28	1.60819	1.4
	(k)	63.94	-27.85	SWIR	WHOLE ROCK	DY0115-017-007	-2.38	1.60516	1.4
	(k)	52.49	-36.04	SWIR	WHOLE ROCK	DY0115-017-008A	-1.035	2.00646	1.4
	(k)	52.49	-36.04	SWIR	WHOLE ROCK	DY0115-017-008B	-1.047	1.81061	1.4
	(k)	52.49	-36.04	SWIR	WHOLE ROCK	DY0115-017-008C	-1.047	1.83309	1.4
	(k)	52.49	-36.04	SWIR	WHOLE ROCK	DY0115-017-009A	-1.12	2.29724	1.4
	(k)	52.49	-36.04	SWIR	WHOLE ROCK	DY0115-017-009B	-1.044	1.66024	1.4
	(k)	63.94	-27.85	SWIR	WHOLE ROCK	DY0115-017-010	-2.846	1.74001	1.4
	(k)	63.94	-27.85	SWIR	WHOLE ROCK	DY0115-017-011	-2.787	1.59289	1.4
	(k)	63.94	-27.85	SWIR	WHOLE ROCK	DY0115-017-012	-2.82	1.58948	1.4
	(k)	52.49	-36.04	SWIR	WHOLE ROCK	DY0115-019-002-001	-0.884	2.15974	1.4
	(k)	52.49	-36.04	SWIR	WHOLE ROCK	DY0115-019-003-001	-0.638	0.915898	1.4
	(k)	52.49	-36.04	SWIR	WHOLE ROCK	DY0115-019-003-002	-0.638	0.75964	1.4
	(k)	52.49	-36.04	SWIR	WHOLE ROCK	DY0115-019-003-004-001	-0.953	1.62074	1.4
	(k)	52.49	-36.04	SWIR	WHOLE ROCK	DY0115-019-003-004-002	-0.787	1.71629	1.4
	(k)	52.49	-36.04	SWIR	WHOLE ROCK	DY0115-019-003-005	-1.059	1.48748	1.4
	(k)	52.49	-36.04	SWIR	WHOLE ROCK	DY0115-019-003-006	-0.971	1.16804	1.4
	(k)	52.49	-36.04	SWIR	WHOLE ROCK	DY0115-019-003-007	-0.95	1.57451	1.4
	(k)	50.47	-37.66	SWIR	WHOLE ROCK	DY0115-019-003-008-001	-1.069	2.00342	1.4
	(k)	50.47	-37.66	SWIR	WHOLE ROCK	DY0115-019-003-008-002	-0.966	1.69228	1.4
	(k)	50.47	-37.66	SWIR	WHOLE ROCK	DY0115-019-003-009	-0.987	1.73722	1.4
	(k)	50.47	-37.66	SWIR	WHOLE ROCK	DY0115-019-003-010	-0.239	4.15813	1.4
	(k)	50.47	-37.66	SWIR	WHOLE ROCK	DY0115-019-003-011-002	-0.466	5.82418	1.4
	(k)	50.47	-37.66	SWIR	WHOLE ROCK	DY0115-019-003-012	-0.396	5.03753	1.4
	(k)	50.46	-37.65	SWIR	WHOLE ROCK	DY0115-019-003-014-002	-0.48	4.37892	1.4
	(k)	52.49	-36.04	SWIR	WHOLE ROCK	DY0115-019-003-017	-1.167	1.6363	1.4
	(k)	50.97	-37.61	SWIR	WHOLE ROCK	DY0115-019-003-018	-0.837	1.33563	1.4
	(k)	50.93	-37.63	SWIR	WHOLE ROCK	DY0115-019-003-019	-0.721	1.84644	1.4
	(k)	51.72	-37.37	SWIR	WHOLE ROCK	DY0115-019-003-021	-0.739	2.1706	1.4
	(k)	51.56	-37.66	SWIR	WHOLE ROCK	DY0115-019-003-024	-1.186	1.27456	1.4
	(k)	51.57	-37.44	SWIR	WHOLE ROCK	DY0115-019-003-025	-0.594	2.92449	1.4
	(k)	59.11	-31.09	SWIR	WHOLE ROCK	DY0115-019-004	-2.05	2.30095	1.4
	(k)	63.94	-27.85	SWIR	GLASS	DY0115-019-007	-2.36	1.57831	1.4
	(k)	52.49	-36.04	SWIR	WHOLE ROCK	DY0115-019-008B	-1.097	1.93406	1.4
	(k)	52.49	-36.04	SWIR	WHOLE ROCK	DY0115-019-009A	-1.09	2.24443	1.4
	(k)	52.49	-36.04	SWIR	WHOLE ROCK	DY0115-020-004-002	-0.923	1.59453	1.4
	(k)	51.72	-37.37	SWIR	WHOLE ROCK	DY0115-020-004-005	-0.708	1.90654	1.4
	(k)	51.73	-37.47	SWIR	WHOLE ROCK	DY0115-020-004-006	-0.816	2.02866	1.4
	(k)	50.47	-37.66	SWIR	WHOLE ROCK	DY0115-020-004-007	-0.23	6.43157	1.4
	(k)	48.6	-38.13	SWIR	WHOLE ROCK	DY0115-020-005-004	-0.601	2.29515	1.4
	(k)	50.47	-37.68	SWIR	WHOLE ROCK	DY0115-020-005-006	-0.621	1.34449	1.4
	(k)	50.47	-37.68	SWIR	WHOLE ROCK	DY0115-020-005-006	-0.783	0.915032	1.4
	(k)	50.47	-37.66	SWIR	WHOLE ROCK	DY0115-020-005-012	-0.386	5.02799	1.4
	(k)	50.4671	-37.6579	SWIR	WHOLE ROCK	DY0115-020-005-014-1	-0.573	4.3514	1.4
	(k)	50.4671	-37.6579	SWIR	WHOLE ROCK	DY0115-020-005-014-2	-0.49	4.41686	1.4
	(k)	50.97	-37.61	SWIR	WHOLE ROCK	DY0115-020-005-018	-0.857	1.46117	1.4
	(k)	50.99	-37.61	SWIR	WHOLE ROCK	DY0115-020-005-020	-0.94	1.23691	1.4
	(k)	51.72	-37.47	SWIR	WHOLE ROCK	DY0115-020-005-021	-0.719	2.06588	1.4
	(k)	52.8	-36.2	SWIR	GLASS	DY0115-021-002-003	7.192			with excess CaO
	(k)	52.5	-36.6	SWIR	WHOLE ROCK	DY0115-021-002	-1.67	2.63791	1.4
	(k)	52.8	-36.2	SWIR	GLASS	DY0115-021-002-005	1.37			with excess CaO
	(k)	52.6	-37	SWIR	WHOLE ROCK	DY0115-021-003-001-005	-1.17	6.16948	1.4
	(k)	48.6	-38.13	SWIR	WHOLE ROCK	DY0115-021-004	-0.561	2.19595	1.4
	(k)	52.4	-36.8	SWIR	WHOLE ROCK	DY0115-021-004-002	-1.064	6.45257	1.4
	(k)	52.5582	-36.506	SWIR	WHOLE ROCK	DY0115-021-005-001	-0.787	2.13189	1.4
	(k)	52.5	-36.5	SWIR	WHOLE ROCK	DY0115-021-007-001	-1.603	1.85286	1.4
	(k)	52.5	-36.5	SWIR	WHOLE ROCK	DY0115-021-007-002	-4.127	5.48453	1.4
	(k)	52.5	-36.5	SWIR	WHOLE ROCK	DY0115-021-007-003	-1.094	1.98278	1.4
	(k)	52.52	-36.67	SWIR	WHOLE ROCK	DY0115-021-008	-1.335	4.07563	1.4
	(k)	16.233	-52.33	SWIR	GLASS	KNO0162-7-002-001	-2.084	2.55757	1.4
	(k)	16.507	-52.299	SWIR	GLASS	KNO0162-7-003-001	-1.32	3.12129	1.4
	(k)	16.507	-52.299	SWIR	GLASS	KNO0162-7-003-002	-1.214	3.20764	1.4
	(k)	17.113	-52.358	SWIR	GLASS	KNO0162-7-004-003	-1.455	3.25861	1.4
	(k)	17.113	-52.358	SWIR	GLASS	KNO0162-7-004-006	-1.461	3.16879	1.4
	(k)	17.113	-52.358	SWIR	GLASS	KNO0162-7-004-007	-1.456	3.00532	1.4
	(k)	17.113	-52.358	SWIR	GLASS	KNO0162-7-004-013	-1.417	3.22102	1.4
	(k)	17.113	-52.358	SWIR	GLASS	KNO0162-7-004-015	-1.426	3.27617	1.4
	(k)	17.113	-52.358	SWIR	GLASS	KNO0162-7-004-016	-1.515	3.20498	1.4
	(k)	17.113	-52.358	SWIR	GLASS	KNO0162-7-004-022	-1.661	2.95548	1.4
	(k)	17.113	-52.358	SWIR	GLASS	KNO0162-7-004-031	-1.406	3.25097	1.4
	(k)	17.113	-52.358	SWIR	GLASS	KNO0162-7-004-033	-1.354	3.25715	1.4
	(k)	17.113	-52.358	SWIR	GLASS	KNO0162-7-004-046	-1.436	3.41357	1.4
	(k)	17.113	-52.358	SWIR	GLASS	KNO0162-7-004-052	-1.461	3.10244	1.4
	(k)	17.428	-52.423	SWIR	GLASS	KNO0162-7-005-001	-2.244	1.48994	1.4
	(k)	17.428	-52.423	SWIR	GLASS	KNO0162-7-005-005	-1.54	2.5874	1.4
	(k)	17.428	-52.423	SWIR	GLASS	KNO0162-7-005-006	-1.557	2.66528	1.4
	(k)	17.702	-52.52	SWIR	GLASS	KNO0162-7-006-001	-1.403	3.52701	1.4
	(k)	17.702	-52.52	SWIR	GLASS	KNO0162-7-006-002	-1.291	3.6669	1.4
	(k)	17.702	-52.52	SWIR	GLASS	KNO0162-7-006-003	-1.242	0.761219	1.4
	(k)	17.702	-52.52	SWIR	GLASS	KNO0162-7-006-004	-1.274	0.88122	1.4
	(k)	17.702	-52.52	SWIR	GLASS	KNO0162-7-006-007	-1.448	3.3654	1.4
	(k)	18.028	-52.548	SWIR	GLASS	KNO0162-7-007-002	-2.028	3.13685	1.4
	(k)	18.028	-52.548	SWIR	GLASS	KNO0162-7-007-003	-2.124	3.29756	1.4
	(k)	18.028	-52.548	SWIR	GLASS	KNO0162-7-007-004	-2.041	3.36594	1.4
	(k)	18.028	-52.548	SWIR	GLASS	KNO0162-7-007-005	-2.058	3.30363	1.4
	(k)	18.336	-52.615	SWIR	GLASS	KNO0162-7-008-002	-1.727	3.28089	1.4
	(k)	18.336	-52.615	SWIR	GLASS	KNO0162-7-008-005	-1.716	3.30036	1.4
	(k)	18.336	-52.615	SWIR	GLASS	KNO0162-7-008-006	-1.749	3.26099	1.4
	(k)	18.336	-52.615	SWIR	GLASS	KNO0162-7-008-008	-1.7	3.46662	1.4
	(k)	18.336	-52.615	SWIR	GLASS	KNO0162-7-008-010	-1.722	3.58001	1.4
	(k)	18.336	-52.615	SWIR	GLASS	KNO0162-7-008-011	-1.706	3.37372	1.4
	(k)	18.336	-52.615	SWIR	GLASS	KNO0162-7-008-016	-1.757	3.3631	1.4
	(k)	18.336	-52.615	SWIR	GLASS	KNO0162-7-008-018	-1.806	3.58974	1.4
	(k)	18.336	-52.615	SWIR	GLASS	KNO0162-7-008-021	-1.793	3.2219	1.4
	(k)	18.336	-52.615	SWIR	GLASS	KNO0162-7-008-024	-1.735	3.36459	1.4
	(k)	18.336	-52.615	SWIR	GLASS	KNO0162-7-008-025	-1.838	3.48203	1.4
	(k)	18.827	-52.695	SWIR	GLASS	KNO0162-7-009-001	-1.244	3.68438	1.4
	(k)	19.269	-52.745	SWIR	GLASS	KNO0162-7-010-001	-1.498	3.80313	1.4
	(k)	19.269	-52.745	SWIR	GLASS	KNO0162-7-010-002	-1.419	3.75525	1.4
	(k)	19.269	-52.745	SWIR	GLASS	KNO0162-7-010-007	-1.528	3.42518	1.4
	(k)	19.269	-52.745	SWIR	GLASS	KNO0162-7-010-010	-1.776	3.1764	1.4
	(k)	19.269	-52.745	SWIR	GLASS	KNO0162-7-010-016	-1.478	3.47899	1.4
	(k)	19.269	-52.745	SWIR	GLASS	KNO0162-7-010-021	-1.438	3.90803	1.4
	(k)	19.269	-52.745	SWIR	GLASS	KNO0162-7-010-023	-1.521	2.91579	1.4
	(k)	19.2	-52.799	SWIR	GLASS	KNO0162-7-011-002	-1.528	4.46146	1.4
	(k)	19.2	-52.799	SWIR	GLASS	KNO0162-7-011-008	-1.462	4.14683	1.4
	(k)	19.2	-52.799	SWIR	GLASS	KNO0162-7-011-011	-1.303	3.28102	1.4
	(k)	19.2	-52.799	SWIR	GLASS	KNO0162-7-011-013	-1.381	3.48106	1.4
	(k)	19.2	-52.799	SWIR	GLASS	KNO0162-7-011-021	-1.257	3.41532	1.4
	(k)	19.2	-52.799	SWIR	GLASS	KNO0162-7-011-023	-1.323	3.50627	1.4
	(k)	19.2	-52.799	SWIR	GLASS	KNO0162-7-011-025	-1.531	4.15789	1.4
	(k)	19.2	-52.799	SWIR	GLASS	KNO0162-7-011-028	-1.296	3.386	1.4
	(k)	19.2	-52.799	SWIR	GLASS	KNO0162-7-011-030	-1.331	3.38107	1.4
	(k)	19.2	-52.799	SWIR	GLASS	KNO0162-7-011-034	-1.463	4.42612	1.4
	(k)	19.2	-52.799	SWIR	GLASS	KNO0162-7-011-035	-1.474	3.67805	1.4
	(k)	19.913	-52.856	SWIR	GLASS	KNO0162-7-013-001	-1.36	2.65926	1.4
	(k)	19.913	-52.856	SWIR	GLASS	KNO0162-7-013-002	-1.376	2.58105	1.4
	(k)	19.913	-52.856	SWIR	GLASS	KNO0162-7-013-029	-1.419	2.69317	1.4
	(k)	19.913	-52.856	SWIR	GLASS	KNO0162-7-013-031	-1.473	2.48191	1.4
	(k)	19.913	-52.856	SWIR	GLASS	KNO0162-7-013-039	-1.408	2.63594	1.4
	(k)	19.913	-52.856	SWIR	GLASS	KNO0162-7-013-041	-1.458	2.5939	1.4
	(k)	19.913	-52.856	SWIR	GLASS	KNO0162-7-013-042	-1.26	2.09913	1.4
	(k)	19.913	-52.856	SWIR	GLASS	KNO0162-7-013-043	-1.327	2.02931	1.4
	(k)	20.398	-52.873	SWIR	GLASS	KNO0162-7-014-001	-1.285	4.06184	1.4
	(k)	20.398	-52.873	SWIR	GLASS	KNO0162-7-014-002	-1.3	3.91081	1.4
	(k)	20.398	-52.873	SWIR	GLASS	KNO0162-7-014-003	-1.249	3.93727	1.4
	(k)	20.398	-52.873	SWIR	GLASS	KNO0162-7-014-004	-1.301	3.93443	1.4
	(k)	20.398	-52.873	SWIR	GLASS	KNO0162-7-014-006	-1.217	3.9811	1.4
	(k)	20.398	-52.873	SWIR	GLASS	KNO0162-7-014-007	-1.262	3.59113	1.4
	(k)	20.398	-52.873	SWIR	GLASS	KNO0162-7-014-008	-1.272	3.78925	1.4
	(k)	20.398	-52.873	SWIR	GLASS	KNO0162-7-014-009	-1.218	3.75738	1.4
	(k)	20.398	-52.873	SWIR	GLASS	KNO0162-7-014-010	-1.225	3.69922	1.4
	(k)	20.382	-52.923	SWIR	GLASS	KNO0162-7-015-005	-1.033	3.56077	1.4
	(k)	20.661	-52.922	SWIR	GLASS	KNO0162-7-016-001	-0.646	2.08264	1.4
	(k)	20.661	-52.922	SWIR	GLASS	KNO0162-7-016-002	-0.624	2.14673	1.4
	(k)	20.661	-52.922	SWIR	GLASS	KNO0162-7-016-004	-0.627	1.59351	1.4
	(k)	20.661	-52.922	SWIR	GLASS	KNO0162-7-016-007	-0.643	2.08564	1.4
	(k)	20.925	-52.949	SWIR	GLASS	KNO0162-7-017-001	-1.412	3.38617	1.4
	(k)	20.925	-52.949	SWIR	GLASS	KNO0162-7-017-002	-1.356	3.58632	1.4
	(k)	20.925	-52.949	SWIR	GLASS	KNO0162-7-017-003	-0.854	2.32199	1.4
	(k)	20.925	-52.949	SWIR	GLASS	KNO0162-7-017-004	-0.776	2.08217	1.4
	(k)	20.925	-52.949	SWIR	GLASS	KNO0162-7-017-005	-0.816	2.93465	1.4
	(k)	20.925	-52.949	SWIR	GLASS	KNO0162-7-017-006	-1.37	3.4777	1.4
	(k)	20.925	-52.949	SWIR	GLASS	KNO0162-7-017-008	-0.793	2.99816	1.4
	(k)	20.925	-52.949	SWIR	GLASS	KNO0162-7-017-013	-1.197	3.37508	1.4
	(k)	20.925	-52.949	SWIR	GLASS	KNO0162-7-017-015	-0.771	2.61421	1.4
	(k)	20.925	-52.949	SWIR	GLASS	KNO0162-7-017-016	-0.719	3.00808	1.4
	(k)	20.925	-52.949	SWIR	GLASS	KNO0162-7-017-017	-0.737	2.80927	1.4
	(k)	20.925	-52.949	SWIR	GLASS	KNO0162-7-017-018	-0.67	2.91599	1.4
	(k)	20.925	-52.949	SWIR	GLASS	KNO0162-7-017-021	-1.44	4.02123	1.4
	(k)	20.925	-52.949	SWIR	GLASS	KNO0162-7-017-026	-0.832	3.31699	1.4
	(k)	20.925	-52.949	SWIR	GLASS	KNO0162-7-017-029	-1.361	4.13736	1.4
	(k)	20.925	-52.949	SWIR	GLASS	KNO0162-7-017-032	-0.765	3.21393	1.4
	(k)	20.925	-52.949	SWIR	GLASS	KNO0162-7-017-033	-1.294	3.80476	1.4
	(k)	21.406	-52.99	SWIR	GLASS	KNO0162-7-018-001	-1.098	3.45653	1.4
	(k)	21.406	-52.99	SWIR	GLASS	KNO0162-7-018-002	-1.195	3.21514	1.4
	(k)	21.406	-52.99	SWIR	GLASS	KNO0162-7-018-003	-1.119	3.02056	1.4
	(k)	21.406	-52.99	SWIR	GLASS	KNO0162-7-018-004	-1.156	2.96639	1.4
	(k)	21.406	-52.99	SWIR	GLASS	KNO0162-7-018-005	-1.123	3.25906	1.4
	(k)	21.406	-52.99	SWIR	GLASS	KNO0162-7-018-008	-1.166	3.09239	1.4
	(k)	21.406	-52.99	SWIR	GLASS	KNO0162-7-018-009	-1.269	3.51449	1.4
	(k)	21.406	-52.99	SWIR	GLASS	KNO0162-7-018-010	-1.188	3.33829	1.4
	(k)	21.406	-52.99	SWIR	GLASS	KNO0162-7-018-012	-1.145	3.47751	1.4
	(k)	21.406	-52.99	SWIR	GLASS	KNO0162-7-018-013	-1.148	3.5073	1.4
	(k)	21.406	-52.99	SWIR	GLASS	KNO0162-7-018-016	-1.225	3.48945	1.4
	(k)	21.406	-52.99	SWIR	GLASS	KNO0162-7-018-017	-1.177	3.21255	1.4
	(k)	21.406	-52.99	SWIR	GLASS	KNO0162-7-018-019	-1.169	3.59993	1.4
	(k)	21.406	-52.99	SWIR	GLASS	KNO0162-7-018-021	-1.102	3.27823	1.4
	(k)	21.376	-53.05	SWIR	GLASS	KNO0162-7-019-002	-1.589	3.45963	1.4
	(k)	21.376	-53.05	SWIR	GLASS	KNO0162-7-019-004	-1.599	3.65669	1.4
	(k)	22.177	-53.039	SWIR	GLASS	KNO0162-7-020-001	-1.016	4.53431	1.4
	(k)	22.177	-53.039	SWIR	GLASS	KNO0162-7-020-002	-0.901	4.3244	1.4
	(k)	22.177	-53.039	SWIR	GLASS	KNO0162-7-020-003	-0.891	4.52819	1.4
	(k)	22.177	-53.039	SWIR	GLASS	KNO0162-7-020-004	-0.872	4.43024	1.4
	(k)	22.177	-53.039	SWIR	GLASS	KNO0162-7-020-006	-0.859	4.66032	1.4
	(k)	22.177	-53.039	SWIR	GLASS	KNO0162-7-020-009	-1.002	4.49484	1.4
	(k)	22.177	-53.039	SWIR	GLASS	KNO0162-7-020-010	-0.971	4.53346	1.4
	(k)	22.468	-53.035	SWIR	GLASS	KNO0162-7-021-001	-0.69	4.04069	1.4
	(k)	22.468	-53.035	SWIR	GLASS	KNO0162-7-021-002	-0.658	3.91515	1.4
	(k)	22.468	-53.035	SWIR	GLASS	KNO0162-7-021-005	-0.685	3.92812	1.4
	(k)	22.468	-53.035	SWIR	GLASS	KNO0162-7-021-006	-0.592	4.10318	1.4
	(k)	22.468	-53.035	SWIR	GLASS	KNO0162-7-021-008	-0.717	3.80163	1.4
	(k)	22.468	-53.035	SWIR	GLASS	KNO0162-7-021-013	-0.773	4.2778	1.4
	(k)	22.468	-53.035	SWIR	GLASS	KNO0162-7-021-021	-0.804	3.39952	1.4
	(k)	22.468	-53.035	SWIR	GLASS	KNO0162-7-021-023	-0.77	3.92598	1.4
	(k)	22.468	-53.035	SWIR	GLASS	KNO0162-7-021-025	-0.679	4.40345	1.4
	(k)	22.468	-53.035	SWIR	GLASS	KNO0162-7-021-030	-0.87	3.78156	1.4
	(k)	22.647	-53.109	SWIR	GLASS	KNO0162-7-022-002	-0.815	4.42494	1.4
	(k)	22.647	-53.109	SWIR	GLASS	KNO0162-7-022-005	-0.874	4.32692	1.4
	(k)	22.647	-53.109	SWIR	GLASS	KNO0162-7-022-013	-0.94	4.57105	1.4
	(k)	22.647	-53.109	SWIR	GLASS	KNO0162-7-022-014	-0.879	4.59684	1.4
	(k)	22.647	-53.109	SWIR	GLASS	KNO0162-7-022-016	-0.87	4.75599	1.4
	(k)	22.647	-53.109	SWIR	GLASS	KNO0162-7-022-027	-0.762	4.23537	1.4
	(k)	22.647	-53.109	SWIR	GLASS	KNO0162-7-022-034	-0.904	4.47594	1.4
	(k)	22.647	-53.109	SWIR	GLASS	KNO0162-7-022-035	-0.801	3.58628	1.4
	(k)	22.647	-53.109	SWIR	GLASS	KNO0162-7-022-038	-0.819	4.3511	1.4
	(k)	22.547	-53.173	SWIR	GLASS	KNO0162-7-023-031	-1.287	4.7336	1.4
	(k)	22.547	-53.173	SWIR	GLASS	KNO0162-7-023-032	-1.219	4.86939	1.4
	(k)	22.547	-53.173	SWIR	GLASS	KNO0162-7-023-036	-1.256	4.8114	1.4
	(k)	22.547	-53.173	SWIR	GLASS	KNO0162-7-023-038	-1.207	4.71465	1.4
	(k)	22.547	-53.173	SWIR	GLASS	KNO0162-7-023-042	-1.204	4.88802	1.4
	(k)	22.547	-53.173	SWIR	GLASS	KNO0162-7-023-044	-1.22	4.81405	1.4
	(k)	22.547	-53.173	SWIR	GLASS	KNO0162-7-023-064	-2.121	3.95464	1.4
	(k)	22.547	-53.173	SWIR	GLASS	KNO0162-7-023-107	-2.179	3.90356	1.4
	(k)	22.852	-53.158	SWIR	GLASS	KNO0162-7-024-003	-0.659	4.10536	1.4
	(k)	22.852	-53.158	SWIR	GLASS	KNO0162-7-024-004	-0.651	3.88168	1.4
	(k)	22.852	-53.158	SWIR	GLASS	KNO0162-7-024-007	-0.712	4.12382	1.4
	(k)	22.852	-53.158	SWIR	GLASS	KNO0162-7-024-008	-0.765	3.84278	1.4
	(k)	22.852	-53.158	SWIR	GLASS	KNO0162-7-024-025	-0.664	2.2629	1.4
	(k)	22.852	-53.158	SWIR	GLASS	KNO0162-7-024-030	-0.571	4.05115	1.4
	(k)	22.852	-53.158	SWIR	GLASS	KNO0162-7-024-031	-0.599	3.88477	1.4
	(k)	22.852	-53.158	SWIR	GLASS	KNO0162-7-024-033	-0.688	3.12086	1.4
	(k)	22.852	-53.158	SWIR	GLASS	KNO0162-7-024-034	-0.786	2.71717	1.4
	(k)	22.852	-53.158	SWIR	GLASS	KNO0162-7-024-037	-0.753	3.44379	1.4
	(k)	22.852	-53.158	SWIR	GLASS	KNO0162-7-024-047	-0.676	4.07958	1.4
	(k)	23.117	-53.173	SWIR	GLASS	KNO0162-7-025-001	-1.308	3.63193	1.4
	(k)	23.117	-53.173	SWIR	GLASS	KNO0162-7-025-002	-1.298	3.88383	1.4
	(k)	23.117	-53.173	SWIR	GLASS	KNO0162-7-025-003	-1.447	3.77981	1.4
	(k)	23.117	-53.173	SWIR	GLASS	KNO0162-7-025-004	-1.38	3.99697	1.4
	(k)	23.117	-53.173	SWIR	GLASS	KNO0162-7-025-005	-1.441	3.75738	1.4
	(k)	23.117	-53.173	SWIR	GLASS	KNO0162-7-025-006	-1.427	3.63424	1.4
	(k)	23.117	-53.173	SWIR	GLASS	KNO0162-7-025-010	-1.545	3.8778	1.4
	(k)	23.117	-53.173	SWIR	GLASS	KNO0162-7-025-011	-1.466	3.85669	1.4
	(k)	23.117	-53.173	SWIR	GLASS	KNO0162-7-025-015	-1.494	3.78604	1.4
	(k)	23.117	-53.173	SWIR	GLASS	KNO0162-7-025-020	-1.437	3.65168	1.4
	(k)	23.117	-53.173	SWIR	GLASS	KNO0162-7-025-022	-1.435	3.67728	1.4
	(k)	23.358	-53.214	SWIR	GLASS	KNO0162-7-026-002	-0.896	4.76988	1.4
	(k)	23.358	-53.214	SWIR	GLASS	KNO0162-7-026-003	-0.838	4.8131	1.4
	(k)	23.358	-53.214	SWIR	GLASS	KNO0162-7-026-006	-0.196	4.61047	1.4
	(k)	23.358	-53.214	SWIR	GLASS	KNO0162-7-026-006	0.528			with excess CaO
	(k)	11.157	-52.994	SWIR	GLASS	KNO0162-9-030-034	-0.794	7.40996	1.4
	(k)	23.358	-53.214	SWIR	GLASS	KNO0162-7-026-008	-0.803	4.20083	1.4
	(k)	23.358	-53.214	SWIR	GLASS	KNO0162-7-026-012	-0.12	4.22883	1.4
	(k)	23.358	-53.214	SWIR	GLASS	KNO0162-7-026-012	-0.58	3.74168	1.4
	(k)	23.358	-53.214	SWIR	GLASS	KNO0162-7-026-013	-0.06	4.67033	1.4
	(k)	23.358	-53.214	SWIR	GLASS	KNO0162-7-026-013	-7.203	11.6541	1.4
	(k)	23.358	-53.214	SWIR	GLASS	KNO0162-7-026-016	-0.154	4.51231	1.4
	(k)	23.358	-53.214	SWIR	GLASS	KNO0162-7-026-018	-0.181	4.66434	1.4
	(k)	23.358	-53.214	SWIR	GLASS	KNO0162-7-026-018	-0.584	4.84395	1.4
	(k)	23.358	-53.214	SWIR	GLASS	KNO0162-7-026-019	-0.039	4.39244	1.4
	(k)	23.358	-53.214	SWIR	GLASS	KNO0162-7-026-021	-0.058	4.51761	1.4
	(k)	23.358	-53.214	SWIR	GLASS	KNO0162-7-026-023	-0.067	4.39457	1.4
	(k)	23.358	-53.214	SWIR	GLASS	KNO0162-7-026-027	-0.232	4.31721	1.4
	(k)	23.358	-53.214	SWIR	GLASS	KNO0162-7-026-029	-0.07	4.53015	1.4
	(k)	10.674	-52.896	SWIR	GLASS	KNO0162-7-028-015	-2.551	4.00778	1.4
	(k)	10.674	-52.896	SWIR	GLASS	KNO0162-7-028-016	-2.479	4.48517	1.4
	(k)	10.674	-52.896	SWIR	GLASS	KNO0162-7-028-017	-2.582	4.33655	1.4
	(k)	10.674	-52.896	SWIR	GLASS	KNO0162-9-028-024	-0.38	2.4156	1.4
	(k)	10.674	-52.896	SWIR	GLASS	KNO0162-9-028-026	-2.094	4.21928	1.4
	(k)	10.674	-52.896	SWIR	GLASS	KNO0162-9-028-035	-2.051	3.89394	1.4
	(k)	10.674	-52.896	SWIR	GLASS	KNO0162-9-028-040	-1.299	5.75613	1.4
	(k)	10.674	-52.896	SWIR	GLASS	KNO0162-9-028-052	-1.335	5.96508	1.4
	(k)	10.674	-52.896	SWIR	GLASS	KNO0162-9-028-058	-0.552	2.75435	1.4
	(k)	10.674	-52.896	SWIR	GLASS	KNO0162-9-028-060	-1.299	5.72798	1.4
	(k)	10.674	-52.896	SWIR	GLASS	KNO0162-9-028-063	-2.07	4.27605	1.4
	(k)	10.674	-52.896	SWIR	GLASS	KNO0162-9-028-065	-1.263	5.58233	1.4
	(k)	10.674	-52.896	SWIR	GLASS	KNO0162-9-028-066	-1.953	4.04073	1.4
	(k)	10.674	-52.896	SWIR	GLASS	KNO0162-9-028-067	-1.446	5.79032	1.4
	(k)	10.67	-52.9	SWIR	GLASS	KNO0162-9-028-032	-2.566	4.15091	1.4
	(k)	11.157	-52.994	SWIR	GLASS	KNO0162-9-030-006	-0.589	6.36452	1.4
	(k)	11.157	-52.994	SWIR	GLASS	KNO0162-9-030-011	-0.588	2.85149	1.4
	(k)	11.157	-52.994	SWIR	GLASS	KNO0162-9-030-012	-0.671	2.90432	1.4
	(k)	11.157	-52.994	SWIR	GLASS	KNO0162-9-030-016	-0.749	6.34462	1.4
	(k)	11.157	-52.994	SWIR	GLASS	KNO0162-9-030-018	-0.607	2.79988	1.4
	(k)	11.157	-52.994	SWIR	GLASS	KNO0162-9-030-021	-0.679	2.91214	1.4
	(k)	11.157	-52.994	SWIR	GLASS	KNO0162-9-030-023	-0.65	2.63844	1.4
	(k)	11.157	-52.994	SWIR	GLASS	KNO0162-9-030-025	-0.657	6.65283	1.4
	(k)	11.157	-52.994	SWIR	GLASS	KNO0162-9-030-034	-0.812	6.75586	1.4
	(k)	11.082	-52.805	SWIR	GLASS	KNO0162-9-031-001	-1.763	1.30812	1.4
	(k)	11.218	-52.749	SWIR	GLASS	KNO0162-9-032-003	-2.511	0.959755	1.4
	(k)	11.218	-52.749	SWIR	GLASS	KNO0162-9-032-011	-2.568	1.00528	1.4
	(k)	11.218	-52.749	SWIR	GLASS	KNO0162-9-032-004	-2.499	1.12412	1.4
	(k)	11.218	-52.749	SWIR	GLASS	KNO0162-9-032-009	-2.452	1.09838	1.4
	(k)	11.218	-52.749	SWIR	GLASS	KNO0162-9-032-016	-2.506	0.908137	1.4
	(k)	11.387	-52.817	SWIR	GLASS	KNO0162-9-033-048	-5.308	1.98144	1.4
	(k)	11.387	-52.817	SWIR	GLASS	KNO0162-9-033-049	-3.629	1.76967	1.4
	(k)	11.387	-52.817	SWIR	GLASS	KNO0162-9-033-051	-4.107	2.05348	1.4
	(k)	11.387	-52.817	SWIR	GLASS	KNO0162-9-033-055	-4.036	1.89908	1.4
	(k)	11.387	-52.817	SWIR	GLASS	KNO0162-9-033-056	-4.028	1.89259	1.4
	(k)	11.387	-52.817	SWIR	GLASS	KNO0162-9-033-059	-1.856	0.785276	1.4
	(k)	11.387	-52.817	SWIR	GLASS	KNO0162-9-033-060	-2.329	1.29969	1.4
	(k)	11.387	-52.817	SWIR	GLASS	KNO0162-9-033-064	-4.096	1.84062	1.4
	(k)	11.387	-52.817	SWIR	GLASS	KNO0162-9-033-066	-2.586	1.13239	1.4
	(k)	11.387	-52.817	SWIR	GLASS	KNO0162-9-033-067	-1.273	0.655981	1.4
	(k)	11.43	-52.857	SWIR	GLASS	KNO0162-9-034-001	-0.014	0.127439	1.4
	(k)	11.43	-52.857	SWIR	GLASS	KNO0162-9-034-006	-0.003	0.428233	1.4
	(k)	11.43	-52.857	SWIR	GLASS	KNO0162-9-034-018	-1.355	0.315879	1.4
	(k)	11.43	-52.857	SWIR	GLASS	KNO0162-9-034-019	-1.48	0.603219	1.4
	(k)	11.43	-52.857	SWIR	GLASS	KNO0162-9-034-021	-1.07	0.746638	1.4
	(k)	11.43	-52.857	SWIR	GLASS	KNO0162-9-034-023	-1.192	0.709901	1.4
	(k)	11.43	-52.857	SWIR	GLASS	KNO0162-9-034-039	-0.872	0.566945	1.4
	(k)	11.43	-52.857	SWIR	GLASS	KNO0162-9-034-042	-3.481	1.45279	1.4
	(k)	11.555	-52.927	SWIR	GLASS	KNO0162-9-035-003	-3.537	0.899441	1.4
	(k)	11.555	-52.927	SWIR	GLASS	KNO0162-9-035-004	-3.384	1.25805	1.4
	(k)	11.555	-52.927	SWIR	GLASS	KNO0162-9-035-005	-3.506	1.05076	1.4
	(k)	11.555	-52.927	SWIR	GLASS	KNO0162-9-035-009	-3.226	1.52435	1.4
	(k)	11.555	-52.927	SWIR	GLASS	KNO0162-9-035-010	-3.239	0.839966	1.4
	(k)	11.555	-52.927	SWIR	GLASS	KNO0162-9-035-014	-3.442	0.699522	1.4
	(k)	11.711	-52.749	SWIR	GLASS	KNO0162-9-036-001	-1.717	4.88103	1.4
	(k)	11.711	-52.749	SWIR	GLASS	KNO0162-9-036-005	-1.755	4.93964	1.4
	(k)	11.711	-52.749	SWIR	GLASS	KNO0162-9-036-007	-1.859	4.7966	1.4
	(k)	11.711	-52.749	SWIR	GLASS	KNO0162-9-036-011	-1.964	4.80735	1.4
	(k)	11.711	-52.749	SWIR	GLASS	KNO0162-9-036-017	-1.826	4.60086	1.4
	(k)	11.711	-52.749	SWIR	GLASS	KNO0162-9-036-018	-1.745	4.87668	1.4
	(k)	11.711	-52.749	SWIR	GLASS	KNO0162-9-036-027	-1.973	4.6523	1.4
	(k)	11.711	-52.749	SWIR	GLASS	KNO0162-9-036-028	-1.914	5.04058	1.4
	(k)	11.711	-52.749	SWIR	GLASS	KNO0162-9-036-044	-1.766	4.61621	1.4
	(k)	11.854	-52.777	SWIR	GLASS	KNO0162-9-038-002	-2.332	3.0045	1.4
	(k)	11.854	-52.777	SWIR	GLASS	KNO0162-9-038-003	-2.374	3.07772	1.4
	(k)	11.854	-52.777	SWIR	GLASS	KNO0162-9-038-004	-2.364	3.06521	1.4
	(k)	11.854	-52.777	SWIR	GLASS	KNO0162-9-038-007	-2.415	3.48573	1.4
	(k)	11.854	-52.777	SWIR	GLASS	KNO0162-9-038-015	-2.322	3.37514	1.4
	(k)	11.854	-52.777	SWIR	GLASS	KNO0162-9-038-016	-2.372	3.42945	1.4
	(k)	11.854	-52.777	SWIR	GLASS	KNO0162-9-038-017	-2.316	3.39231	1.4
	(k)	11.854	-52.777	SWIR	GLASS	KNO0162-9-038-021	-2.409	3.43527	1.4
	(k)	12.132	-52.589	SWIR	GLASS	KNO0162-9-041-005	-0.349	5.66971	1.4
	(k)	12.132	-52.589	SWIR	GLASS	KNO0162-9-041-007	-2.026	1.74113	1.4
	(k)	12.132	-52.589	SWIR	GLASS	KNO0162-9-041-012	-1.161	2.40194	1.4
	(k)	12.132	-52.589	SWIR	GLASS	KNO0162-9-041-013	-0.975	1.86403	1.4
	(k)	12.799	-52.56	SWIR	GLASS	KNO0162-9-048-004	-0.14	5.79385	1.4
	(k)	12.799	-52.56	SWIR	GLASS	KNO0162-9-048-008	-1.638	6.39667	1.4
	(k)	12.799	-52.56	SWIR	GLASS	KNO0162-9-048-018A	-0.141	5.7777	1.4
	(k)	12.799	-52.56	SWIR	GLASS	KNO0162-9-048-018B	-0.172	5.9463	1.4
	(k)	12.799	-52.56	SWIR	GLASS	KNO0162-9-048-021	0.406			with excess CaO
	(k)	12.799	-52.56	SWIR	GLASS	KNO0162-9-048-023	-1.591	6.10829	1.4
	(k)	12.861	-52.479	SWIR	GLASS	KNO0162-9-049-001	-1.618	5.60621	1.4
	(k)	12.861	-52.479	SWIR	GLASS	KNO0162-9-049-005	-1.686	5.28316	1.4
	(k)	12.861	-52.479	SWIR	GLASS	KNO0162-9-049-011	-1.212	4.80418	1.4
	(k)	12.861	-52.479	SWIR	GLASS	KNO0162-9-049-013	-1.252	4.79384	1.4
	(k)	12.861	-52.479	SWIR	GLASS	KNO0162-9-049-016	-1.657	5.3435	1.4
	(k)	12.861	-52.479	SWIR	GLASS	KNO0162-9-049-017	-1.701	5.66962	1.4
	(k)	12.861	-52.479	SWIR	GLASS	KNO0162-9-049-026	-1.681	5.7181	1.4
	(k)	13.062	-52.293	SWIR	GLASS	KNO0162-9-051-011	-0.585	4.63923	1.4
	(k)	13.062	-52.293	SWIR	GLASS	KNO0162-9-051-016	-0.583	4.71225	1.4
	(k)	13.062	-52.293	SWIR	GLASS	KNO0162-9-051-020	-0.82	8.55402	1.4
	(k)	13.062	-52.293	SWIR	GLASS	KNO0162-9-051-020	0.582			with excess CaO
	(k)	13.062	-52.293	SWIR	GLASS	KNO0162-9-051-021	-0.564	8.6958	1.4
	(k)	13.062	-52.293	SWIR	GLASS	KNO0162-9-051-023	-1.865	4.21631	1.4
	(k)	13.062	-52.293	SWIR	GLASS	KNO0162-9-051-023	-0.229	7.12289	1.4
	(k)	13.144	-52.475	SWIR	GLASS	KNO0162-9-053-001	-2.051	3.87945	1.4
	(k)	13.144	-52.475	SWIR	GLASS	KNO0162-9-053-002	-1.984	3.71812	1.4
	(k)	13.144	-52.475	SWIR	GLASS	KNO0162-9-053-003	-1.986	3.6701	1.4
	(k)	13.144	-52.475	SWIR	GLASS	KNO0162-9-053-005	-1.948	3.84382	1.4
	(k)	13.506	-52.37	SWIR	GLASS	KNO0162-9-056-088	-2.227	3.08582	1.4
	(k)	15.644	-52.293	SWIR	GLASS	KNO0162-9-064-001	-1.651	4.10027	1.4
	(k)	15.644	-52.293	SWIR	GLASS	KNO0162-9-064-005	-1.54	4.25701	1.4
	(k)	70.323	-25.864	SWIR	GLASS	DUF0023-004-005	-1.266	5.58252	1.4
	(k)	70.323	-25.864	SWIR	GLASS	DUF0023-004-007	-1.471	5.31052	1.4
	(k)	43.7	-40.98	SWIR	GLASS	DUF0034-004	-1.82	1.89499	1.4
	(k)	38.795	-44.18	SWIR	GLASS	DUF0034-006	-0.688258	4.68249	1.4
	(k)	56.931	-33.628	SWIR	GLASS	CON2709-044-004	-1.11	4.19589	1.4
	(k)	56.931	-33.628	SWIR	GLASS	CON2709-044-005	-1.1	4.25802	1.4
	(k)	56.931	-33.628	SWIR	GLASS	CON2709-044-007	-1.997	4.01938	1.4
	(k)	56.931	-33.628	SWIR	GLASS	CON2709-044-007	-2.453	0.678605	1.4
	(k)	56.931	-33.628	SWIR	GLASS	CON2709-044-009	-2.027	3.33578	1.4
	(k)	56.931	-33.628	SWIR	GLASS	CON2709-044-010	-2.275	3.73455	1.4
	(k)	56.931	-33.628	SWIR	GLASS	CON2709-044-010	-2.155	4.10065	1.4
	(k)	56.931	-33.628	SWIR	GLASS	CON2709-044-011	-1.068	3.96018	1.4
	(k)	56.931	-33.628	SWIR	GLASS	CON2709-044-007	-1.747	3.58422	1.4
	(k)	56.931	-33.628	SWIR	GLASS	CON2709-044-009	-2.183	4.12234	1.4
	(k)	60.62	-29.3	SWIR	GLASS	MELANTP-114-001	-2.596	3.16175	1.4
	(k)	61.9	-28.85	SWIR	GLASS	MELANTP-111-001	-2.699	6.13437	1.4
	(k)	61.9	-28.85	SWIR	GLASS	MELANTP-111-001	-2.749	6.41523	1.4
	(k)	61.9	-28.85	SWIR	GLASS	MELANTP-111-003	-2.81	6.26634	1.4
	(k)	60.62	-29.3	SWIR	GLASS	MELANTP-114-010	-2.596	3.16175	1.4
	(k)	61.9	-28.85	SWIR	GLASS	MELANTP-111-001	-2.78	6.60795	1.4
	(k)	61.9	-28.85	SWIR	GLASS	MELANTP-111-003	-2.851	6.24303	1.4
	(k)	61.9	-28.85	SWIR	GLASS	MELANTP-111-010	-2.699	6.04213	1.4
	(k)	60.67	-29.3	SWIR	WHOLE ROCK	MELANTP-113-001-1	-1.201	3.98045	1.4
	(k)	25.488	-53.16	SWIR	WHOLE ROCK	MELPROT-5-011-023	-5.152	7.14677	1.4
	(k)	32.147	-47.7	SWIR	WHOLE ROCK	MELPROT-5-015-120	-1.373	3.32229	1.4
	(k)	32.147	-47.7	SWIR	WHOLE ROCK	MELPROT-5-015-138	-1.582	1.37242	1.4
	(k)	32.147	-47.7	SWIR	WHOLE ROCK	MELPROT-5-015-143	-0.678	7.17794	1.4
	(k)	32.147	-47.7	SWIR	WHOLE ROCK	MELPROT-5-015-146	-1.683	3.19634	1.4
	(k)	32.147	-47.7	SWIR	WHOLE ROCK	MELPROT-5-015-148	-1.135	5.63074	1.4
	(k)	32.147	-47.7	SWIR	WHOLE ROCK	MELPROT-5-015-152	-0.436	2.60886	1.4
	(k)	32.352	-47.647	SWIR	WHOLE ROCK	MELPROT-5-016-023	-0.644	4.45977	1.4
	(k)	33.508	-46.378	SWIR	WHOLE ROCK	MELPROT-5-017-028	-0.774	1.1659	1.4
	(k)	33.508	-46.378	SWIR	WHOLE ROCK	MELPROT-5-017-032	-0.763	3.70964	1.4
	(k)	33.508	-46.378	SWIR	GLASS	MELPROT-5-017-049	4.24			with excess CaO
	(k)	33.508	-46.378	SWIR	GLASS	MELPROT-5-017-054	-2.046	7.41146	1.4
	(k)	33.763	-46.525	SWIR	WHOLE ROCK	MELPROT-5-018-108	-1.702	3.14391	1.4
	(k)	33.763	-46.525	SWIR	WHOLE ROCK	MELPROT-5-018-110	-1.311	3.12592	1.4
	(k)	33.763	-46.525	SWIR	WHOLE ROCK	MELPROT-5-018-123	-1.138	0.414634	1.4
	(k)	33.832	-46.507	SWIR	WHOLE ROCK	MELPROT-5-019-187	-0.993	7.24587	1.4
	(k)	33.87	-46.495	SWIR	WHOLE ROCK	MELPROT-5-020-002	-0.343	0.698651	1.4
	(k)	33.87	-46.495	SWIR	WHOLE ROCK	MELPROT-5-020-021	-2.067	5.79897	1.4
	(k)	33.87	-46.495	SWIR	WHOLE ROCK	MELPROT-5-020-033	-0.992	0.198456	1.4
	(k)	33.87	-46.495	SWIR	WHOLE ROCK	MELPROT-5-020-052	-4.179	2.65531	1.4
	(k)	33.87	-46.495	SWIR	WHOLE ROCK	MELPROT-5-020-A	-1.75	8.12977	1.4
	(k)	35.847	-44.815	SWIR	WHOLE ROCK	MELPROT-5-025-001	-0.042	4.55284	1.4
	(k)	35.847	-44.815	SWIR	WHOLE ROCK	MELPROT-5-025-005	0.115			with excess CaO
	(k)	35.847	-44.815	SWIR	WHOLE ROCK	MELPROT-5-025-015	0.4			with excess CaO
	(k)	35.847	-44.815	SWIR	WHOLE ROCK	MELPROT-5-025-033	-2.108	0.845171	1.4
	(k)	35.847	-44.815	SWIR	WHOLE ROCK	MELPROT-5-025-054	-0.366	2.62025	1.4
	(k)	35.847	-44.815	SWIR	WHOLE ROCK	MELPROT-5-025-127	-1.045	1.63367	1.4
	(k)	35.847	-44.815	SWIR	WHOLE ROCK	MELPROT-5-025-130	-2.319	0.352165	1.4
	(k)	35.847	-44.815	SWIR	WHOLE ROCK	MELPROT-5-025-152	0.511			with excess CaO
	(k)	35.847	-44.815	SWIR	WHOLE ROCK	MELPROT-5-025-217	-1.001	1.82574	1.4
	(k)	35.847	-44.815	SWIR	WHOLE ROCK	MELPROT-5-025-240	-2.467	1.10062	1.4
	(k)	39.308	-43.612	SWIR	WHOLE ROCK	MELPROT-5-027-009	-2.207	1.6639	1.4
	(k)	39.308	-43.612	SWIR	WHOLE ROCK	MELPROT-5-027-033	-4.866	2.20814	1.4
	(k)	39.852	-43.377	SWIR	GLASS	MELPROT-5-028-005	-0.501	3.71046	1.4
	(k)	39.852	-43.377	SWIR	GLASS	MELPROT-5-028-011	-1.455	2.83143	1.4
	(k)	39.852	-43.377	SWIR	WHOLE ROCK	MELPROT-5-028-013	-1.983	1.97857	1.4
	(k)	39.852	-43.377	SWIR	WHOLE ROCK	MELPROT-5-028-022	-0.295	4.70677	1.4
	(k)	39.852	-43.377	SWIR	WHOLE ROCK	MELPROT-5-028-074	-2.023	1.81397	1.4
	(k)	39.852	-43.377	SWIR	WHOLE ROCK	MELPROT-5-028-148	-0.596	0.294222	1.4
	(k)	41.89	-42.685	SWIR	WHOLE ROCK	MELPROT-5-029-037	-1.684	4.67816	1.4
	(k)	41.89	-42.685	SWIR	WHOLE ROCK	MELPROT-5-029-054	-1.485	1.94333	1.4
	(k)	41.89	-42.685	SWIR	WHOLE ROCK	MELPROT-5-029-061	-0.996	2.42185	1.4
	(k)	41.985	-42.687	SWIR	WHOLE ROCK	MELPROT-5-030-063	-2.327	1.88755	1.4
	(k)	41.985	-42.687	SWIR	WHOLE ROCK	MELPROT-5-030-075	-2.242	2.07444	1.4
	(k)	41.985	-42.687	SWIR	WHOLE ROCK	MELPROT-5-030-101	-2.573	1.5087	1.4
	(k)	45.76	-40.13	SWIR	WHOLE ROCK	MELPROT-5-037-003	1.356			with excess CaO
	(k)	46.63	-38.66	SWIR	WHOLE ROCK	MELPROT-5-041-025	-0.664	2.56584	1.4
	(k)	46.63	-38.66	SWIR	WHOLE ROCK	MELPROT-5-041-049	-0.62	3.09916	1.4
	(k)	46.63	-38.66	SWIR	GLASS	MELPROT-5-041-073	-0.532	1.82802	1.4
	(k)	46.63	-38.66	SWIR	WHOLE ROCK	MELPROT-5-042-010	-0.943	1.94524	1.4
	(k)	46.713	-38.432	SWIR	GLASS	MELPROT-5-042-001	-0.677	3.60138	1.4
	(k)	46.713	-38.432	SWIR	WHOLE ROCK	MELPROT-5-042-003	-0.74	2.58866	1.4
	(k)	23.271	-53.277	SWIR	GLASS	MELVANC-7-066-019	-0.265	4.24059	1.4
	(k)	23.271	-53.277	SWIR	GLASS	MELVANC-7-066-054	-0.833	3.74418	1.4
	(k)	23.271	-53.277	SWIR	GLASS	MELVANC-7-066-058	-1.085	3.5926	1.4
	(k)	23.271	-53.277	SWIR	GLASS	MELVANC-7-066-066	-0.848	3.73726	1.4
	(k)	23.271	-53.277	SWIR	GLASS	MELVANC-7-066-073	-1.458	3.54536	1.4
	(k)	23.019	-53.285	SWIR	GLASS	MELVANC-7-067-021	-1.247	3.68142	1.4
	(k)	23.019	-53.285	SWIR	GLASS	MELVANC-7-067-026	-1.365	3.83406	1.4
	(k)	22.791	-53.227	SWIR	GLASS	MELVANC-7-068-001	-1.2	0.633285	1.4
	(k)	22.791	-53.227	SWIR	GLASS	MELVANC-7-068-002	-1.076	4.33345	1.4
	(k)	22.791	-53.227	SWIR	GLASS	MELVANC-7-068-021	-1.121	4.51363	1.4
	(k)	22.451	-53.135	SWIR	GLASS	MELVANC-7-069-035	-1.676	3.83761	1.4
	(k)	22.451	-53.135	SWIR	GLASS	MELVANC-7-069-039	-1.57	3.75608	1.4
	(k)	22.451	-53.135	SWIR	GLASS	MELVANC-7-069-050	-1.006	4.5252	1.4
	(k)	22.451	-53.135	SWIR	GLASS	MELVANC-7-069-057	-1.106	4.67869	1.4
	(k)	22.451	-53.135	SWIR	GLASS	MELVANC-7-069-071	-1.079	4.8692	1.4
	(k)	22.451	-53.135	SWIR	GLASS	MELVANC-7-069-079	-1.544	3.79663	1.4
	(k)	21.978	-53.043	SWIR	GLASS	MELVANC-7-070-001	-0.989	0.965848	1.4
	(k)	21.978	-53.043	SWIR	GLASS	MELVANC-7-070-048	-1.273	4.17191	1.4
	(k)	21.978	-53.043	SWIR	GLASS	MELVANC-7-070-051	-1.265	3.87405	1.4
	(k)	21.978	-53.043	SWIR	GLASS	MELVANC-7-070-065	-1.243	4.01432	1.4
	(k)	21.978	-53.043	SWIR	GLASS	MELVANC-7-070-079	-1.23	3.95015	1.4
	(k)	21.978	-53.043	SWIR	GLASS	MELVANC-7-070-087	-1.223	3.915	1.4
	(k)	20.693	-52.976	SWIR	GLASS	MELVANC-7-073-001	-1.048	4.07885	1.4
	(k)	20.693	-52.976	SWIR	GLASS	MELVANC-7-073-002	-1.468	4.39868	1.4
	(k)	20.693	-52.976	SWIR	GLASS	MELVANC-7-073-003	-1.598	3.65493	1.4
	(k)	20.693	-52.976	SWIR	GLASS	MELVANC-7-073-006	-1.609	3.3207	1.4
	(k)	19.783	-52.904	SWIR	GLASS	MELVANC-7-074-001	-1.329	1.81035	1.4
	(k)	19.783	-52.904	SWIR	GLASS	MELVANC-7-074-002	-1.316	1.91505	1.4
	(k)	19.783	-52.904	SWIR	GLASS	MELVANC-7-074-008	-2.131	3.61142	1.4
	(k)	19.775	-52.995	SWIR	GLASS	MELVANC-7-075-028	-0.872	2.80097	1.4
	(k)	19.775	-52.995	SWIR	GLASS	MELVANC-7-075-029	-0.855	2.93578	1.4
	(k)	19.775	-52.995	SWIR	GLASS	MELVANC-7-075-032	-2.277	2.98895	1.4
	(k)	19.775	-52.995	SWIR	GLASS	MELVANC-7-075-033	-0.542	7.11821	1.4
	(k)	16.635	-52.38	SWIR	GLASS	MELVANC-7-078-001	-1.813	4.72343	1.4
	(k)	16.125	-52.296	SWIR	GLASS	MELVANC-7-079-003	-1.325	3.19116	1.4
	(k)	16.125	-52.296	SWIR	GLASS	MELVANC-7-079-008	-1.272	3.14804	1.4
	(k)	16.125	-52.296	SWIR	GLASS	MELVANC-7-079-011	-1.177	2.65781	1.4
	(k)	16.125	-52.296	SWIR	GLASS	MELVANC-7-079-013	-1.399	2.93379	1.4
	(k)	16.125	-52.296	SWIR	GLASS	MELVANC-7-079-025	-1.347	2.8647	1.4
	(k)	16.125	-52.296	SWIR	GLASS	MELVANC-7-079-034	-1.221	3.19283	1.4
	(k)	16.125	-52.296	SWIR	GLASS	MELVANC-7-079-038	-2.57	1.93983	1.4
	(k)	16.007	-52.232	SWIR	GLASS	MELVANC-7-080-001	-1.828	3.36303	1.4
	(k)	16.007	-52.232	SWIR	GLASS	MELVANC-7-080-002	-1.479	3.23429	1.4
	(k)	16.007	-52.232	SWIR	GLASS	MELVANC-7-080-003	-1.577	3.0804	1.4
	(k)	16.007	-52.232	SWIR	GLASS	MELVANC-7-080-004	-1.623	3.19888	1.4
	(k)	15.837	-52.173	SWIR	GLASS	MELVANC-7-083-001	-1.807	2.4612	1.4
	(k)	15.837	-52.173	SWIR	GLASS	MELVANC-7-083-002	-1.8	2.67962	1.4
	(k)	14.789	-52.235	SWIR	GLASS	MELVANC-7-087-001	-0.902	1.04621	1.4
	(k)	14.789	-52.235	SWIR	GLASS	MELVANC-7-087-002	-0.786	0.766459	1.4
	(k)	14.789	-52.235	SWIR	GLASS	MELVANC-7-087-003	-0.792	0.572084	1.4
	(k)	14.789	-52.235	SWIR	GLASS	MELVANC-7-087-004	-0.768	0.753915	1.4
	(k)	14.707	-52.217	SWIR	GLASS	MELVANC-7-088-001	-1.288	1.36954	1.4
	(k)	14.707	-52.217	SWIR	GLASS	MELVANC-7-088-003	-1.33	1.18395	1.4
	(k)	14.707	-52.217	SWIR	GLASS	MELVANC-7-088-009	-1.398	1.39587	1.4
	(k)	14.707	-52.217	SWIR	GLASS	MELVANC-7-088-012	-1.264	0.985326	1.4
	(k)	14.598	-52.246	SWIR	GLASS	MELVANC-7-089-002	-0.584	0.463464	1.4
	(k)	14.598	-52.246	SWIR	GLASS	MELVANC-7-089-004	-4.851	2.07648	1.4
	(k)	14.598	-52.246	SWIR	GLASS	MELVANC-7-089-006	-4.847	2.65758	1.4
	(k)	14.598	-52.246	SWIR	GLASS	MELVANC-7-089-013	-2.067	2.74102	1.4
	(k)	14.353	-52.177	SWIR	GLASS	MELVANC-7-090-003	-4.281	1.92936	1.4
	(k)	14.353	-52.177	SWIR	GLASS	MELVANC-7-090-006	-2.018	1.77225	1.4
	(k)	14.353	-52.177	SWIR	GLASS	MELVANC-7-090-035	-0.743	0.262399	1.4
	(k)	14.353	-52.177	SWIR	GLASS	MELVANC-7-090-052	-2.228	1.3016	1.4
	(k)	14.353	-52.177	SWIR	GLASS	MELVANC-7-090-077	0.988			with excess CaO
	(k)	14.353	-52.177	SWIR	GLASS	MELVANC-7-090-082A	-0.513	0.144466	1.4
	(k)	14.353	-52.177	SWIR	GLASS	MELVANC-7-090-082B	-0.34	0.118736	1.4
	(k)	13.267	-52.093	SWIR	GLASS	MELVANC-7-091-032	-2.131	4.18572	1.4
	(k)	13.267	-52.093	SWIR	GLASS	MELVANC-7-091-034	-2.081	5.49878	1.4
	(k)	10.888	-52.855	SWIR	GLASS	MELVANC-7-092-001	-2.27	1.19548	1.4
	(k)	10.888	-52.855	SWIR	GLASS	MELVANC-7-092-003	-1.739	0.792002	1.4
	(k)	25.488	-53.16	SWIR	WHOLE ROCK	MELPROT-5-011-036	-0.666	4.37413	1.4
	(k)	25.508	-53.175	SWIR	WHOLE ROCK	MELPROT-5-012-009	-2.821	6.72762	1.4
	(k)	25.508	-53.175	SWIR	WHOLE ROCK	MELPROT-5-012-013	-0.9	2.18246	1.4
	(k)	25.537	-53.095	SWIR	WHOLE ROCK	MELPROT-5-013-086	-2.05	9.95561	1.4
	(k)	25.537	-53.095	SWIR	WHOLE ROCK	MELPROT-5-013-087	-1.731	7.44854	1.4
	(k)	25.327	-53.113	SWIR	WHOLE ROCK	MELPROT-5-014-085	-2.111	3.23473	1.4
	(k)	32.147	-47.7	SWIR	WHOLE ROCK	MELPROT-5-015-126	1.509			with excess CaO
	(k)	32.147	-47.7	SWIR	WHOLE ROCK	MELPROT-5-015-133	-0.624	2.63459	1.4
	(k)	26.335	-52.58	SWIR	WHOLE ROCK	MELPROT-5-009-001	-2.844	4.01195	1.4
	(k)	57.266	-32.7233	SWIR	WHOLE ROCK	ODP0118-0735B-001D-001/035-037	-1.073	4.00589	1.4
	(k)	57.266	-32.7233	SWIR	WHOLE ROCK	ODP0118-0735B-023R-005/003-005	0.129			with excess CaO
	(k)	57.266	-32.7233	SWIR	WHOLE ROCK	ODP0118-0735B-23R-004/83	-1.202	3.52328	1.4
	(k)	57.233	-31.882	SWIR	WHOLE ROCK	CON2709-003-010	-1.72633	3.3834	1.4
	(k)	57.233	-31.882	SWIR	GLASS	CON2709-003-017	-2.348	2.30718	1.4
	(k)	57.233	-31.882	SWIR	GLASS	CON2709-003-059	-2.348	2.43315	1.4
	(k)	57.233	-31.882	SWIR	GLASS	CON2709-003-063	-2.417	1.91057	1.4
	(k)	56.781	-33.655	SWIR	GLASS	CON2709-001-002	-0.699	1.94332	1.4
	(k)	57.233	-31.882	SWIR	GLASS	CON2709-003-017	-2.093	2.64353	1.4
	(k)	57.233	-31.882	SWIR	GLASS	CON2709-003-017	-2.17726	1.4903	1.4
	(k)	57.233	-31.882	SWIR	WHOLE ROCK	CON2709-003-017	-1.54379	3.39389	1.4
	(k)	57.233	-31.882	SWIR	GLASS	CON2709-003-017	-2.164	2.94106	1.4
	(k)	56.781	-33.655	SWIR	GLASS	CON2709-001-001	-0.682	1.84887	1.4
	(k)	56.781	-33.655	SWIR	GLASS	CON2709-001-002	-0.879	1.21836	1.4
	(k)	57.233	-31.882	SWIR	GLASS	CON2709-003-066	-2.1236	1.78209	1.4
	(k)	57.557	-31.795	SWIR	GLASS	DIS0208-004-008A	-2.123	3.14646	1.4
	(k)	57.557	-31.795	SWIR	GLASS	DIS0208-004-008M	-2.094	3.08424	1.4
	(k)	57.557	-31.795	SWIR	GLASS	DIS0208-004-009L	-2.845	3.12087	1.4
	(k)	65.683	-27.6	SWIR	GLASS	DIS0208-010-032I	-1.92	5.88115	1.4
	(k)	65.683	-27.6	SWIR	GLASS	DIS0208-010-032I	-1.853	5.90762	1.4
	(k)	65.683	-27.6	SWIR	GLASS	DIS0208-010-033A	-1.877	5.95323	1.4
	(k)	57.18	-31.917	SWIR	GLASS	CON2709-006-001	-1.791	6.95967	1.4
	(k)	14.63	-52.22	SWIR	WHOLE ROCK	POLANT4-4-002-001	-0.4107	6.35753	1.4
	(k)	14.63	-52.22	SWIR	GLASS	POLANT4-4-002-013	-1.999	0.512514	1.4
	(k)	14.63	-52.22	SWIR	GLASS	POLANT4-4-002-024	-1.89	0.38584	1.4
	(k)	14.63	-52.22	SWIR	GLASS	POLANT4-4-002-028	-1.293	0.127055	1.4
	(k)	14.63	-52.22	SWIR	GLASS	POLANT4-4-002-029	-1.4	0.265283	1.4
	(k)	14.63	-52.22	SWIR	WHOLE ROCK	POLANT4-4-002-035	-1.811	1.1762	1.4
	(k)	14.5	-53.12	SWIR	GLASS	POLANT4-4-003-006	-3.261	1.37771	1.4
	(k)	14.5	-53.12	SWIR	GLASS	POLANT4-4-003-010	-2.115	1.08642	1.4
	(k)	14.5	-53.12	SWIR	GLASS	POLANT4-4-003-014	-4.942	2.31711	1.4
	(k)	14.5	-53.12	SWIR	WHOLE ROCK	POLANT4-4-003-014	-1.968	1.02639	1.4
	(k)	13.68	-52.28	SWIR	GLASS	POLANT4-4-005-009	-1.957	3.96678	1.4
	(k)	14.12	-52.1	SWIR	WHOLE ROCK	POLANT4-4-004-068	-3.219	7.17427	1.4
	(k)	14.12	-52.1	SWIR	WHOLE ROCK	POLANT4-4-004-101	-4.524	1.7419	1.4
	(k)	13.68	-52.28	SWIR	GLASS	POLANT4-4-005-001	-1.957	3.32299	1.4
	(k)	13.68	-52.28	SWIR	GLASS	POLANT4-4-005-002	-1.812	4.08978	1.4
	(k)	13.68	-52.28	SWIR	GLASS	POLANT4-4-005-003	-1.936	3.73037	1.4
	(k)	13.68	-52.28	SWIR	GLASS	POLANT4-4-005-004	-1.688	4.03381	1.4
	(k)	13.68	-52.28	SWIR	GLASS	POLANT4-4-005-005	-1.879	3.77191	1.4
	(k)	13.68	-52.28	SWIR	GLASS	POLANT4-4-005-006	-1.937	4.15357	1.4
	(k)	13.68	-52.28	SWIR	GLASS	POLANT4-4-005-007	-2.005	3.79729	1.4
	(k)	13.68	-52.28	SWIR	GLASS	POLANT4-4-005-008	-1.796	3.49989	1.4
	(k)	13.68	-52.28	SWIR	WHOLE ROCK	POLANT4-4-005-009	-1.677	4.58345	1.4
	(k)	13.68	-52.28	SWIR	GLASS	POLANT4-4-005-009	-1.957	3.96678	1.4
	(k)	13.68	-52.28	SWIR	GLASS	POLANT4-4-005-010	-1.991	3.93999	1.4
	(k)	13.68	-52.28	SWIR	GLASS	POLANT4-4-005-011	-1.85	3.55289	1.4
	(k)	13.68	-52.28	SWIR	GLASS	POLANT4-4-005-012	-1.996	0.785986	1.4
	(k)	13.68	-52.28	SWIR	GLASS	POLANT4-4-005-012	-1.996	3.57621	1.4
	(k)	13.68	-52.28	SWIR	GLASS	POLANT4-4-005-013	-1.929	3.30092	1.4
	(k)	13.68	-52.28	SWIR	GLASS	POLANT4-4-005-014	-1.878	3.76561	1.4
	(k)	13.68	-52.28	SWIR	GLASS	POLANT4-4-005-015	-1.784	3.44403	1.4
	(k)	13.68	-52.28	SWIR	GLASS	POLANT4-4-005-016	-1.973	3.94125	1.4
	(k)	13.68	-52.28	SWIR	GLASS	POLANT4-4-005-017	-1.853	4.68878	1.4
	(k)	13.68	-52.28	SWIR	GLASS	POLANT4-4-005-018	-2.005	4.03252	1.4
	(k)	13.68	-52.28	SWIR	GLASS	POLANT4-4-005-019	-1.713	3.65003	1.4
	(k)	13.68	-52.28	SWIR	GLASS	POLANT4-4-005-020	-1.898	3.9988	1.4
	(k)	13.68	-52.28	SWIR	GLASS	POLANT4-4-005-021	-1.712	3.71595	1.4
	(k)	13.68	-52.28	SWIR	GLASS	POLANT4-4-005-022	-2.044	3.72885	1.4
	(k)	13.68	-52.28	SWIR	GLASS	POLANT4-4-005-023	-2.134	3.84066	1.4
	(k)	13.68	-52.28	SWIR	GLASS	POLANT4-4-005-024	-1.905	3.35917	1.4
	(k)	13.68	-52.28	SWIR	GLASS	POLANT4-4-005-025	-1.992	4.14152	1.4
	(k)	13.68	-52.28	SWIR	GLASS	POLANT4-4-005-026	-1.89	3.5901	1.4
	(k)	13.68	-52.28	SWIR	GLASS	POLANT4-4-005-027	-1.914	3.36396	1.4
	(k)	13.68	-52.28	SWIR	GLASS	POLANT4-4-005-028	-1.793	3.69297	1.4
	(k)	13.68	-52.28	SWIR	GLASS	POLANT4-4-005-029	-2.203	4.5128	1.4
	(k)	13.68	-52.28	SWIR	GLASS	POLANT4-4-005-030	-1.927	2.74416	1.4
	(k)	13.68	-52.28	SWIR	GLASS	POLANT4-4-005-031	-1.839	3.83716	1.4
	(k)	13.68	-52.28	SWIR	GLASS	POLANT4-4-005-032	-2.201	3.50688	1.4
	(k)	13.68	-52.28	SWIR	GLASS	POLANT4-4-005-033	-1.864	3.12692	1.4
	(k)	13.68	-52.28	SWIR	GLASS	POLANT4-4-005-034	-1.975	3.46498	1.4
	(k)	13.68	-52.28	SWIR	GLASS	POLANT4-4-005-035	-1.915	3.62524	1.4
	(k)	13.68	-52.28	SWIR	GLASS	POLANT4-4-005-036	-1.942	0.561578	1.4
	(k)	13.68	-52.28	SWIR	WHOLE ROCK	POLANT4-4-005-036	-1.685	4.67184	1.4
	(k)	13.68	-52.28	SWIR	GLASS	POLANT4-4-005-036	-1.942	3.35678	1.4
	(k)	13.68	-52.28	SWIR	GLASS	POLANT4-4-005-038	-1.843	3.60203	1.4
	(k)	13.68	-52.28	SWIR	GLASS	POLANT4-4-005-040	-1.813	3.72741	1.4
	(k)	13.68	-52.28	SWIR	GLASS	POLANT4-4-005-041	-2.009	4.03307	1.4
	(k)	13.68	-52.28	SWIR	GLASS	POLANT4-4-005-042	-1.934	3.5797	1.4
	(k)	13.68	-52.28	SWIR	GLASS	POLANT4-4-005-043	-1.88	3.90178	1.4
	(k)	13.68	-52.28	SWIR	GLASS	POLANT4-4-005-044	-2.113	4.17509	1.4
	(k)	13.68	-52.28	SWIR	GLASS	POLANT4-4-005-072	-1.886	3.97894	1.4
	(k)	13.68	-52.28	SWIR	GLASS	POLANT4-4-005-073	-2.004	3.32118	1.4
	(k)	13.68	-52.28	SWIR	GLASS	POLANT4-4-005-074	-2.085	3.76676	1.4
	(k)	13.68	-52.28	SWIR	GLASS	POLANT4-4-005-075	-1.82	3.49791	1.4
	(k)	13.68	-52.28	SWIR	GLASS	POLANT4-4-005-076	-1.801	4.06048	1.4
	(k)	13.68	-52.28	SWIR	GLASS	POLANT4-4-005-077	-1.891	3.11926	1.4
	(k)	13.68	-52.28	SWIR	GLASS	POLANT4-4-005-078	-1.866	3.25482	1.4
	(k)	13.68	-52.28	SWIR	GLASS	POLANT4-4-005-086	-1.843	3.57414	1.4
	(k)	13.15	-52.33	SWIR	GLASS	POLANT4-4-006-001	-2.413	2.44746	1.4
	(k)	13.15	-52.33	SWIR	GLASS	POLANT4-4-006-001	-2.413	2.44746	1.4
	(k)	13.15	-52.33	SWIR	WHOLE ROCK	POLANT4-4-006-001	-2.22	3.87471	1.4
	(k)	13.15	-52.33	SWIR	GLASS	POLANT4-4-006-002	-2.648	3.91214	1.4
	(k)	13.15	-52.33	SWIR	WHOLE ROCK	POLANT4-4-006-002	-2.432	5.08973	1.4
	(k)	13.15	-52.33	SWIR	GLASS	POLANT4-4-006-002	-2.648	3.91214	1.4
	(k)	13.15	-52.33	SWIR	WHOLE ROCK	POLANT4-4-006-003	-2.171	3.39419	1.4
	(k)	65.683	-27.6	SWIR	GLASS	DIS0208-010-033A	-1.875	5.7031	1.4
	(k)	65.748	-27.615	SWIR	GLASS	DIS0208-011-034A	-1.971	5.50083	1.4
	(k)	65.94	-27.613	SWIR	GLASS	DIS0208-012-037G	-2.24	6.32959	1.4
	(k)	65.94	-27.613	SWIR	GLASS	DIS0208-012-037G	-2.126	6.20881	1.4
	(k)	66.16	-27.555	SWIR	GLASS	DIS0208-014-041C	-2.131	5.63143	1.4
	(k)	66.16	-27.555	SWIR	GLASS	DIS0208-014-042A	-2.227	5.32242	1.4
	(k)	66.317	-27.545	SWIR	GLASS	DIS0208-015-042A	-2.322	5.39439	1.4
	(k)	66.027	-27.637	SWIR	GLASS	DIS0208-016-046G	-2.478	5.02953	1.4
	(k)	14.63	-52.22	SWIR	GLASS	POLANT4-4-002-002	-1.359	0.0641339	1.4
	(k)	14.63	-52.22	SWIR	GLASS	POLANT4-4-002-010	-2.094	0.162358	1.4
	(k)	14.63	-52.22	SWIR	WHOLE ROCK	POLANT4-4-002-014	-1.402	3.30619	1.4
	(k)	14.63	-52.22	SWIR	WHOLE ROCK	POLANT4-4-002-018	-0.57	2.58034	1.4
	(k)	14.63	-52.22	SWIR	WHOLE ROCK	POLANT4-4-002-024	-1.664	1.72024	1.4
	(k)	14.63	-52.22	SWIR	GLASS	POLANT4-4-002-024	-1.89	0.38584	1.4
	(k)	14.63	-52.22	SWIR	GLASS	POLANT4-4-002-027	-1.362	0.334241	1.4
	(k)	14.63	-52.22	SWIR	GLASS	POLANT4-4-002-032	-1.95	0.166187	1.4
	(k)	14.5	-53.12	SWIR	WHOLE ROCK	POLANT4-4-003-006	-3.502	1.1478	1.4
	(k)	14.5	-53.12	SWIR	GLASS	POLANT4-4-003-006	-3.261	1.37771	1.4
	(k)	14.5	-53.12	SWIR	GLASS	POLANT4-4-003-014	-4.942	2.31711	1.4
	(k)	57.3	-32.7	SWIR	WHOLE ROCK	SHK0462-005	-1.11879	7.10989	1.4
	(k)	57.07	-31.9	SWIR	GLASS	SHK0463-001	-2.56925	1.72243	1.4
	(k)	57.07	-31.9	SWIR	WHOLE ROCK	SHK0463-001	-2.637	3.02948	1.4
	(k)	57.07	-31.9	SWIR	GLASS	SHK0463-003	-1.6716	1.52898	1.4
	(k)	57.07	-31.9	SWIR	WHOLE ROCK	SHK0463-004	-2.496	5.19351	1.4
	(k)	57.07	-31.9	SWIR	GLASS	SHK0463-005	-2.3586	1.5377	1.4
	(k)	57.1	-31.98	SWIR	WHOLE ROCK	SHK0464-001	-1.45	5.42294	1.4
	(k)	57.1	-31.98	SWIR	WHOLE ROCK	SHK0464-003	-1.635	3.27578	1.4
	(k)	57.1	-31.98	SWIR	WHOLE ROCK	SHK0464-005	-1.461	3.18653	1.4
	(k)	57.185	-32.636	SWIR	WHOLE ROCK	SHK0467-011	-2.168	3.94744	1.4
	(k)	57.3	-32.7	SWIR	WHOLE ROCK	SHK0462-006	-1.34677	3.19102	1.4
	(k)	57.3	-32.7	SWIR	WHOLE ROCK	SHK0462-010	-0.336086	3.4088	1.4
	(k)	57.07	-31.9	SWIR	GLASS	SHK0463-002	-2.6738	1.05623	1.4
	(k)	57.07	-31.9	SWIR	WHOLE ROCK	SHK0463-002	-2.616	4.68457	1.4
	(k)	57.07	-31.9	SWIR	WHOLE ROCK	SHK0463-003	-1.902	3.20969	1.4
	(k)	57.07	-31.9	SWIR	GLASS	SHK0463-004	-2.6406	1.44423	1.4
	(k)	57.07	-31.9	SWIR	WHOLE ROCK	SHK0463-005	-2.538	2.64252	1.4
	(k)	57.07	-31.9	SWIR	WHOLE ROCK	SHK0463-005	-2.05019	2.65408	1.4
	(k)	57.1	-31.98	SWIR	GLASS	SHK0464-001	-1.42623	3.12047	1.4
	(k)	57.1	-31.98	SWIR	WHOLE ROCK	SHK0464-002	-1.702	2.97022	1.4
	(k)	57.1	-31.98	SWIR	GLASS	SHK0464-003	-1.4416	3.1678	1.4
	(k)	57.1	-31.98	SWIR	WHOLE ROCK	SHK0464-004	-1.629	2.9286	1.4
	(k)	57.1	-31.98	SWIR	WHOLE ROCK	SHK0464-006	-1.043	5.4536	1.4
	(k)	65.83	-27.6	SWIR	GLASS	AII0093-5-006-003	-4.141	4.30855	1.4
	(k)	65.83	-27.6	SWIR	GLASS	AII0093-5-006-002	-1.703	6.18019	1.4
	(k)	50.47	-37.68	SWIR	WHOLE ROCK	DY0115-021-005-011-007	-1.022	1.62847	1.4
	(k)	50.47	-37.66	SWIR	WHOLE ROCK	DY0115-020-003-008-002	-0.976	1.75949	1.4
	(k)	50.47	-37.66	SWIR	WHOLE ROCK	DY0115-020-003-011-001	-0.477	5.61391	1.4
	(k)	50.47	-37.66	SWIR	WHOLE ROCK	DY0115-020-003-022	-0.288	6.38965	1.4
	(k)	50.46	-37.65	SWIR	WHOLE ROCK	DY0115-020-003-014-002	-0.49	4.41686	1.4
	(k)	50.46	-37.65	SWIR	WHOLE ROCK	DY0115-020-003-015	-0.648	4.33779	1.4
	(k)	50.47	-37.66	SWIR	WHOLE ROCK	DY0115-020-003-008-001	-1.059	1.97491	1.4
	(k)	50.47	-37.66	SWIR	WHOLE ROCK	DY0115-020-003-009	-0.957	1.72139	1.4
	(k)	50.47	-37.66	SWIR	WHOLE ROCK	DY0115-020-005-011-3	-0.772	1.02064	1.4
	(k)	50.47	-37.66	SWIR	WHOLE ROCK	DY0115-020-003-011-002	-0.446	5.7447	1.4
	(k)	50.47	-37.66	SWIR	WHOLE ROCK	DY0115-020-003-012	-0.386	5.02799	1.4
	(k)	50.46	-37.65	SWIR	WHOLE ROCK	DY0115-020-003-014-001	-0.573	4.3514	1.4
	(k)	50.47	-37.68	SWIR	WHOLE ROCK	DY0115-021-005-014-008	-1.038	1.7728	1.4
	(k)	69.936	-27.849	SWIR	WHOLE ROCK	DY0125-30I-TVG2-001	-1.393	9.31335	1.4
	(k)	69.936	-27.849	SWIR	WHOLE ROCK	DY0125-30I-TVG2-002	-1.248	10.3394	1.4
	(k)	63.935	-27.842	SWIR	WHOLE ROCK	DY0125-26I-TVG2-001	-1.938	1.16198	1.4
	(k)	63.923	-27.851	SWIR	WHOLE ROCK	DY0135-49I-TVG1	-1.328	5.60016	1.4
	(k)	63.923	-27.851	SWIR	WHOLE ROCK	DY0115-20VII-TVG19-001	-1.451	5.27067	1.4
	(k)	63.935	-27.849	SWIR	WHOLE ROCK	DY0125-26I-TVG3-001	-2.131	1.25008	1.4
	(k)	63.935	-27.849	SWIR	WHOLE ROCK	DY0125-26I-TVG3-001-002	-2.087	1.24646	1.4
	(k)	63.94	-27.85	SWIR	WHOLE ROCK	DY0115-19III-TVG3-001	-2.164	1.22652	1.4
	(k)	63.938	-27.845	SWIR	GLASS	SHK0446-001	-2.052	2.44626	1.4
	(k)	40.8	-43.89	SWIR	GLASS	DUF0125-017-003	1.577			with excess CaO
	(k)	40.21	-43.43	SWIR	GLASS	DUF0125-015-002	-0.007	2.66276	1.4
	(k)	16.91	-52.293	SWIR	GLASS	AGU0022-001-001	-0.567	3.79124	1.4
	(k)	16.91	-52.293	SWIR	GLASS	AGU0022-001-005	-0.482	3.75606	1.4
	(k)	16.91	-52.293	SWIR	GLASS	AGU0022-001-006	-0.688	3.21986	1.4
	(k)	16.91	-52.293	SWIR	GLASS	AGU0022-001-008	-0.494	2.93622	1.4
	(k)	16.91	-52.293	SWIR	GLASS	AGU0022-001-031	-0.646	3.37681	1.4
	(k)	18.046	-52.294	SWIR	GLASS	AGU0022-003-001	-1.798	3.70513	1.4
	(k)	18.046	-52.294	SWIR	GLASS	AGU0022-003-002	-1.836	3.48033	1.4
	(k)	18.046	-52.294	SWIR	GLASS	AGU0022-003-007	-1.443	4.05911	1.4
	(k)	18.046	-52.294	SWIR	GLASS	AGU0022-003-009	-1.809	3.40742	1.4
	(k)	19.097	-54.76	SWIR	GLASS	AGU0022-005-001	-1.176	5.21108	1.4
	(k)	19.097	-54.76	SWIR	GLASS	AGU0022-005-008	-1.055	5.30427	1.4
	(k)	19.097	-54.76	SWIR	GLASS	AGU0022-005-010	-1.426	4.7154	1.4
	(k)	19.097	-54.76	SWIR	GLASS	AGU0022-005-011	-1.061	3.80468	1.4
	(k)	19.097	-54.76	SWIR	GLASS	AGU0022-005-022	-1.178	3.95373	1.4
	(k)	19.097	-54.76	SWIR	GLASS	AGU0022-005-027	-1.243	3.67482	1.4
	(k)	19.097	-54.76	SWIR	GLASS	AGU0022-005-031	-1.431	4.03954	1.4
	(k)	19.097	-54.76	SWIR	GLASS	AGU0022-005-035	-1.028	3.62075	1.4
	(k)	22.83	-53.158	SWIR	GLASS	AGU0022-009-002	-0.401	3.23232	1.4
	(k)	22.83	-53.158	SWIR	GLASS	AGU0022-009-003	-0.363	3.64825	1.4
	(k)	23.692	-53.393	SWIR	GLASS	AGU0022-012-001	-0.641	3.74861	1.4
	(k)	23.692	-53.393	SWIR	GLASS	AGU0022-012-004	-1.489	2.28853	1.4
	(k)	23.692	-53.393	SWIR	GLASS	AGU0022-012-020	-0.887	5.13488	1.4
	(k)	23.692	-53.393	SWIR	GLASS	AGU0022-012-026	-0.857	5.36695	1.4
	(k)	23.692	-53.393	SWIR	GLASS	AGU0022-012-032	-0.956	5.05891	1.4
	(k)	23.692	-53.393	SWIR	GLASS	AGU0022-012-033	-1.043	5.44038	1.4
	(k)	23.692	-53.393	SWIR	GLASS	AGU0022-012-035	-1.171	4.22913	1.4
	(k)	24.758	-53.408	SWIR	GLASS	AGU0022-013-001	-0.902	5.69728	1.4
	(k)	24.758	-53.408	SWIR	GLASS	AGU0022-013-005	-0.65	5.59847	1.4
	(k)	24.758	-53.408	SWIR	GLASS	AGU0022-013-006	-0.69	5.85068	1.4
	(k)	24.758	-53.408	SWIR	GLASS	AGU0022-013-008	-0.492	3.13349	1.4
	(k)	24.758	-53.408	SWIR	GLASS	AGU0022-013-009	-0.754	6.09183	1.4
	(k)	24.758	-53.408	SWIR	GLASS	AGU0022-013-011	-0.355	2.40432	1.4
	(k)	24.758	-53.408	SWIR	GLASS	AGU0022-013-014	-0.826	3.15307	1.4
	(k)	24.758	-53.408	SWIR	GLASS	AGU0022-013-016	-0.994	5.7162	1.4
	(k)	24.758	-53.408	SWIR	GLASS	AGU0022-013-019	-0.757	3.33717	1.4
	(k)	24.758	-53.408	SWIR	GLASS	AGU0022-013-024	-0.938	6.182	1.4
	(k)	24.758	-53.408	SWIR	GLASS	AGU0022-013-025	-1.157	6.36885	1.4
	(k)	24.758	-53.408	SWIR	GLASS	AGU0022-013-028	-1.169	6.1275	1.4
	(k)	24.758	-53.408	SWIR	GLASS	AGU0022-013-030	-0.776	3.39718	1.4
	(k)	24.758	-53.408	SWIR	GLASS	AGU0022-013-031	-1.095	6.49997	1.4
	(k)	24.758	-53.408	SWIR	GLASS	AGU0022-013-032	-1.138	6.80356	1.4
	(k)	32.67	-47.17	SWIR	WHOLE ROCK	AGU0053-001-032	-0.136	3.21159	1.4
	(k)	34.07	-46.03	SWIR	WHOLE ROCK	AGU0053-003-003	-1.081	2.05893	1.4
	(k)	7.223	-54.045	SWIR	GLASS	AII0107-6-057-002	-1.431	2.54568	1.4
	(k)	56.95	-32.85	SWIR	GLASS	AII0093-5-001-038	0.198			with excess CaO
	(k)	56.95	-32.85	SWIR	GLASS	AII0093-5-001-038	-0.052	4.36489	1.4
	(k)	56.95	-32.85	SWIR	GLASS	AII0093-5-001-VG3099	-1.772	3.11576	1.4
	(k)	56.95	-32.85	SWIR	GLASS	AII0093-5-001-VG3099	-1.772	3.11576	1.4
	(k)	65.83	-27.6	SWIR	WHOLE ROCK	AII0093-5-006-001	-1.749	7.85379	1.4
	(k)	65.83	-27.6	SWIR	GLASS	AII0093-5-006-001	-1.791	6.43265	1.4
	(k)	65.83	-27.6	SWIR	GLASS	AII0093-5-006-002-1	-1.851	4.97604	1.4
	(k)	65.83	-27.6	SWIR	GLASS	AII0093-5-006-002-1	-1.82	6.95959	1.4
	(k)	65.83	-27.6	SWIR	GLASS	AII0093-5-006-002/1	-1.82	6.95959	1.4
	(k)	65.83	-27.6	SWIR	GLASS	AII0093-5-006-003-3	-1.958	5.71967	1.4
	(k)	65.83	-27.6	SWIR	GLASS	AII0093-5-006-003-3	-1.733	6.59212	1.4
	(k)	65.83	-27.6	SWIR	GLASS	AII0093-5-006-003/3	-1.733	6.59212	1.4
	(k)	65.83	-27.6	SWIR	GLASS	AII0093-5-006-013	-1.814	6.47796	1.4
	(k)	65.83	-27.6	SWIR	GLASS	AII0093-5-006-004-1	-1.921	5.40472	1.4
	(k)	65.83	-27.6	SWIR	GLASS	AII0093-5-006-004-1	-1.732	6.7532	1.4
	(k)	65.83	-27.6	SWIR	GLASS	AII0093-5-006-004/1	-1.732	6.7532	1.4
	(k)	65.83	-27.6	SWIR	GLASS	AII0093-5-006-011	-1.879	6.66494	1.4
	(k)	65.83	-27.6	SWIR	GLASS	AII0093-5-006-011	-1.921	9.37393	1.4
	(k)	65.83	-27.6	SWIR	GLASS	AII0093-5-006-012	-1.742	6.27537	1.4
	(k)	65.83	-27.6	SWIR	GLASS	AII0093-5-006-013	-1.86	8.14679	1.4
	(k)	65.83	-27.6	SWIR	GLASS	AII0093-5-006-014	-1.742	6.42362	1.4
	(k)	65.83	-27.6	SWIR	GLASS	AII0093-5-006-014	-2.014	6.78157	1.4
	(k)	65.83	-27.6	SWIR	GLASS	AII0093-5-006-015	-1.857	6.67563	1.4
	(k)	65.83	-27.6	SWIR	GLASS	AII0093-5-006-016	-1.854	6.72231	1.4
	(k)	65.83	-27.6	SWIR	GLASS	AII0093-5-006-017	-1.602	6.01008	1.4
	(k)	65.83	-27.6	SWIR	GLASS	AII0093-5-006-018	-1.461	6.29053	1.4
	(k)	65.83	-27.6	SWIR	GLASS	AII0093-5-006-019	-1.638	6.59126	1.4
	(k)	65.83	-27.6	SWIR	GLASS	AII0093-5-006-020A	-1.737	6.75776	1.4
	(k)	65.83	-27.6	SWIR	GLASS	AII0093-5-006-020B	-2.033	6.7849	1.4
	(k)	65.83	-27.6	SWIR	GLASS	AII0093-5-006-020C	-1.86	6.41091	1.4
	(k)	65.83	-27.6	SWIR	GLASS	AII0093-5-006-020D	-1.821	6.31536	1.4
	(k)	65.83	-27.6	SWIR	GLASS	AII0093-5-006-020E	-1.751	6.26211	1.4
	(k)	65.83	-27.6	SWIR	GLASS	AII0093-5-006-020F	-1.877	6.08503	1.4
	(k)	65.83	-27.6	SWIR	GLASS	AII0093-5-006-020G	-1.892	6.08994	1.4
	(k)	65.83	-27.6	SWIR	GLASS	AII0093-5-006-020H	-1.923	6.39441	1.4
	(k)	65.83	-27.6	SWIR	GLASS	AII0093-5-006-020I	-1.827	6.18948	1.4
	(k)	65.83	-27.6	SWIR	GLASS	AII0093-5-006-020J	-1.842	6.05736	1.4
	(k)	67.66	-26.565	SWIR	WHOLE ROCK	AII0093-5-007-001-1	-1.715	7.50047	1.4
	(k)	67.66	-26.565	SWIR	GLASS	AII0093-5-007-001-2	-1.638	5.7192	1.4
	(k)	67.66	-26.565	SWIR	GLASS	AII0093-5-007-012	-1.698	5.23907	1.4
	(k)	67.66	-26.565	SWIR	WHOLE ROCK	AII0093-5-007-001-2	-1.643	7.3944	1.4
	(k)	67.66	-26.565	SWIR	GLASS	AII0093-5-007-001/2	-1.638	5.7192	1.4
	(k)	67.66	-26.565	SWIR	GLASS	AII0093-5-007-010	-1.704	4.7579	1.4
	(k)	67.66	-26.565	SWIR	GLASS	AII0093-5-007-011	-1.624	5.06078	1.4
	(k)	-0.038	-54.69	SWIR	GLASS	AII0107-6-031-004	-5.917	1.51293	1.4
	(k)	-0.038	-54.69	SWIR	WHOLE ROCK	AII0107-6-031-004	-4.361	0.423571	1.4
	(k)	-0.038	-54.69	SWIR	GLASS	AII0107-6-031-004	-5.765	1.20667	1.4
	(k)	-0.038	-54.69	SWIR	GLASS	AII0107-6-031-005	-4.595	1.54366	1.4
	(k)	-0.038	-54.69	SWIR	GLASS	AII0107-6-031-008	-4.691	1.14772	1.4
	(k)	-0.038	-54.69	SWIR	GLASS	AII0107-6-031-009	-4.851	1.32101	1.4
	(k)	-0.038	-54.69	SWIR	GLASS	AII0107-6-031-011	-4.477	1.16038	1.4
	(k)	-0.038	-54.69	SWIR	GLASS	AII0107-6-031-012	-4.552	1.18047	1.4
	(k)	-0.038	-54.69	SWIR	GLASS	AII0107-6-031-014	-4.533	1.43625	1.4
	(k)	-0.013	-54.662	SWIR	GLASS	AII0107-6-032-001	-2	0.526365	1.4
	(k)	-0.038	-54.69	SWIR	GLASS	AII0107-6-031-014	-4.533	1.43625	1.4
	(k)	-0.038	-54.69	SWIR	GLASS	AII0107-6-031-016	-4.644	1.28467	1.4
	(k)	-0.038	-54.69	SWIR	GLASS	AII0107-6-031-017	-4.828	1.0616	1.4
	(k)	-0.038	-54.69	SWIR	GLASS	AII0107-6-031-022	-4.61	1.25658	1.4
	(k)	-0.038	-54.69	SWIR	GLASS	AII0107-6-031-024	-5.591	0.715799	1.4
	(k)	-0.038	-54.69	SWIR	GLASS	AII0107-6-031-025	-4.713	0.656071	1.4
	(k)	-0.038	-54.69	SWIR	GLASS	AII0107-6-031-025	-4.539	0.538184	1.4
	(k)	-0.013	-54.662	SWIR	GLASS	AII0107-6-032-002	-2.171	1.15332	1.4
	(k)	-0.013	-54.662	SWIR	WHOLE ROCK	AII0107-6-032-002	-1.578	1.70789	1.4
	(k)	-0.013	-54.662	SWIR	GLASS	AII0107-6-032-002	-2.225	0.440295	1.4
	(k)	-0.013	-54.662	SWIR	WHOLE ROCK	AII0107-6-032-003	-2.868	0.382107	1.4
	(k)	-0.013	-54.662	SWIR	GLASS	AII0107-6-032-003	-3.2	0.203495	1.4
	(k)	0.068	-54.648	SWIR	WHOLE ROCK	AII0107-6-033-001	-2.313	0.471744	1.4
	(k)	0.068	-54.648	SWIR	GLASS	AII0107-6-033-001	-2.404	0.739811	1.4
	(k)	0.068	-54.648	SWIR	GLASS	AII0107-6-033-002	-2.236	0.745185	1.4
	(k)	0.068	-54.648	SWIR	GLASS	AII0107-6-033-008	-2.25	0.476148	1.4
	(k)	0.068	-54.648	SWIR	GLASS	AII0107-6-033-008	-2.25	0.476148	1.4
	(k)	0.068	-54.648	SWIR	GLASS	AII0107-6-033-010	-2.305	0.451602	1.4
	(k)	0.068	-54.648	SWIR	GLASS	AII0107-6-033-015	-2.061	0.283231	1.4
	(k)	0.068	-54.648	SWIR	GLASS	AII0107-6-033-035	-2.4	0.268128	1.4
	(k)	0.068	-54.648	SWIR	GLASS	AII0107-6-033-027	-2.372	0.937569	1.4
	(k)	0.068	-54.648	SWIR	WHOLE ROCK	AII0107-6-033-027	-2.238	0.442583	1.4
	(k)	0.068	-54.648	SWIR	GLASS	AII0107-6-033-027	-2.239	0.251382	1.4
	(k)	0.068	-54.648	SWIR	GLASS	AII0107-6-033-044	-2.472	0.184557	1.4
	(k)	0.068	-54.648	SWIR	GLASS	AII0107-6-033-051	-2.306	0.295764	1.4
	(k)	0.127	-54.635	SWIR	GLASS	AII0107-6-034-001	-4.657	0.304779	1.4
	(k)	0.127	-54.635	SWIR	WHOLE ROCK	AII0107-6-034-001	-2.889	0.406441	1.4
	(k)	0.127	-54.635	SWIR	GLASS	AII0107-6-034-001	-4.657	0.304779	1.4
	(k)	0.127	-54.635	SWIR	GLASS	AII0107-6-034-002	-4.139	0.458114	1.4
	(k)	0.127	-54.635	SWIR	WHOLE ROCK	AII0107-6-034-004	-2.877	0.748467	1.4
	(k)	0.127	-54.635	SWIR	GLASS	AII0107-6-034-014	-4.452	0.790984	1.4
	(k)	0.127	-54.635	SWIR	GLASS	AII0107-6-034-004	-4.106	0.775989	1.4
	(k)	0.127	-54.635	SWIR	GLASS	AII0107-6-034-005	-3.92	0.614708	1.4
	(k)	0.127	-54.635	SWIR	WHOLE ROCK	AII0107-6-034-006	-2.923	0.543611	1.4
	(k)	0.127	-54.635	SWIR	GLASS	AII0107-6-034-006	-3.942	0.297772	1.4
	(k)	0.127	-54.635	SWIR	GLASS	AII0107-6-034-007	-4.57	0.769242	1.4
	(k)	0.127	-54.635	SWIR	GLASS	AII0107-6-034-008	-4.801	0.687283	1.4
	(k)	0.127	-54.635	SWIR	GLASS	AII0107-6-034-009	-4.488	0.581856	1.4
	(k)	0.127	-54.635	SWIR	GLASS	AII0107-6-034-010	-4.714	0.975405	1.4
	(k)	0.127	-54.635	SWIR	WHOLE ROCK	AII0107-6-034-011	-3.649	1.193	1.4
	(k)	0.127	-54.635	SWIR	GLASS	AII0107-6-034-011	-4.555	0.938855	1.4
	(k)	0.127	-54.635	SWIR	GLASS	AII0107-6-034-012	-4.687	1.34197	1.4
	(k)	0.127	-54.635	SWIR	GLASS	AII0107-6-034-013	-4.706	1.60934	1.4
	(k)	0.127	-54.635	SWIR	WHOLE ROCK	AII0107-6-034-013	-3.612	1.07313	1.4
	(k)	0.127	-54.635	SWIR	GLASS	AII0107-6-034-013	-4.543	0.710566	1.4
	(k)	0.127	-54.635	SWIR	GLASS	AII0107-6-034-015	-3.661	0.671427	1.4
	(k)	0.127	-54.635	SWIR	WHOLE ROCK	AII0107-6-034-015	-3.717	1.00921	1.4
	(k)	0.127	-54.635	SWIR	GLASS	AII0107-6-034-015	-4.638	1.11075	1.4
	(k)	0.803	-54.723	SWIR	WHOLE ROCK	AII0107-6-035-016	-0.507	3.24375	1.4
	(k)	0.803	-54.723	SWIR	WHOLE ROCK	AII0107-6-035-022	-1.125	4.99664	1.4
	(k)	0.803	-54.723	SWIR	WHOLE ROCK	AII0107-6-035-023	-0.42	6.67957	1.4
	(k)	0.823	-54.715	SWIR	WHOLE ROCK	AII0107-6-036-004	-2.28	1.15007	1.4
	(k)	0.823	-54.715	SWIR	WHOLE ROCK	AII0107-6-036-007	-2.342	0.395445	1.4
	(k)	0.823	-54.715	SWIR	WHOLE ROCK	AII0107-6-036-011	-0.201	3.28002	1.4
	(k)	0.823	-54.715	SWIR	WHOLE ROCK	AII0107-6-036-012	-0.301	3.7369	1.4
	(k)	0.823	-54.715	SWIR	WHOLE ROCK	AII0107-6-036-013	-0.621	4.13719	1.4
	(k)	0.823	-54.715	SWIR	WHOLE ROCK	AII0107-6-036-016	-0.677	4.52403	1.4
	(k)	0.838	-54.737	SWIR	WHOLE ROCK	AII0107-6-037-003	-0.341	1.32149	1.4
	(k)	3.56	-53.99	SWIR	WHOLE ROCK	AII0107-6-046-001	0.896			with excess CaO
	(k)	3.56	-53.99	SWIR	GLASS	AII0107-6-046-001	-0.075	1.53381	1.4
	(k)	3.56	-53.99	SWIR	GLASS	AII0107-6-046-001	-0.075	1.53381	1.4
	(k)	3.52	-54.03	SWIR	GLASS	AII0107-6-047-001	-2.686	2.94222	1.4
	(k)	3.52	-54.03	SWIR	GLASS	AII0107-6-047-001	-2.686	2.94222	1.4
	(k)	3.52	-54.03	SWIR	WHOLE ROCK	AII0107-6-047-003	-2.485	2.30219	1.4
	(k)	3.52	-54.03	SWIR	GLASS	AII0107-6-047-003	-2.654	3.18864	1.4
	(k)	3.52	-54.03	SWIR	GLASS	AII0107-6-047-003	-2.654	3.18864	1.4
	(k)	3.52	-54.03	SWIR	WHOLE ROCK	AII0107-6-047-011	-2.556	2.0461	1.4
	(k)	3.52	-54.03	SWIR	GLASS	AII0107-6-047-011	-2.596	3.06654	1.4
	(k)	3.52	-54.03	SWIR	GLASS	AII0107-6-047-011	-2.596	3.06654	1.4
	(k)	3.52	-54.03	SWIR	GLASS	AII0107-6-047-013	-2.602	2.61959	1.4
	(k)	3.52	-54.03	SWIR	GLASS	AII0107-6-047-013	-2.602	2.61959	1.4
	(k)	3.52	-54.03	SWIR	GLASS	AII0107-6-047-018	-2.544	2.91207	1.4
	(k)	3.52	-54.03	SWIR	GLASS	AII0107-6-047-018	-2.544	2.91207	1.4
	(k)	3.52	-54.03	SWIR	GLASS	AII0107-6-047-020	-2.413	2.57456	1.4
	(k)	3.52	-54.03	SWIR	GLASS	AII0107-6-047-020	-2.413	2.57456	1.4
	(k)	3.52	-54.03	SWIR	GLASS	AII0107-6-047-026	-2.627	2.92318	1.4
	(k)	3.52	-54.03	SWIR	GLASS	AII0107-6-047-026	-2.627	2.92318	1.4
	(k)	3.52	-54.03	SWIR	GLASS	AII0107-6-047-032	-2.304	2.19216	1.4
	(k)	3.52	-54.03	SWIR	GLASS	AII0107-6-047-032	-2.304	2.19216	1.4
	(k)	3.52	-54.03	SWIR	GLASS	AII0107-6-047-037	-2.539	2.335	1.4
	(k)	3.52	-54.03	SWIR	GLASS	AII0107-6-047-037	-2.539	2.335	1.4
	(k)	3.52	-54.03	SWIR	GLASS	AII0107-6-047-038	-2.528	2.60109	1.4
	(k)	3.522	-54.03	SWIR	GLASS	AII0107-6-048-002	-2.567	2.68956	1.4
	(k)	3.522	-54.03	SWIR	WHOLE ROCK	AII0107-6-048-004	-2.574	2.01685	1.4
	(k)	3.522	-54.03	SWIR	GLASS	AII0107-6-048-004	-2.708	3.12529	1.4
	(k)	3.522	-54.03	SWIR	GLASS	AII0107-6-048-005	-2.63	3.16289	1.4
	(k)	3.522	-54.03	SWIR	GLASS	AII0107-6-048-008	-2.627	2.8341	1.4
	(k)	3.522	-54.03	SWIR	WHOLE ROCK	AII0107-6-048-009	-2.579	1.68233	1.4
	(k)	3.522	-54.03	SWIR	GLASS	AII0107-6-048-009	-2.529	2.42802	1.4
	(k)	3.522	-54.03	SWIR	GLASS	AII0107-6-048-010	-2.474	2.8317	1.4
	(k)	3.522	-54.03	SWIR	GLASS	AII0107-6-048-011	-2.479	3.06839	1.4
	(k)	7.223	-54.045	SWIR	GLASS	AII0107-6-057-019	-0.802	3.31465	1.4
	(k)	5.137	-54.397	SWIR	GLASS	AII0107-6-056-001	-1.526	2.15673	1.4
	(k)	5.18	-54.21	SWIR	WHOLE ROCK	AII0107-6-053-004	-0.178	3.3002	1.4
	(k)	5.18	-54.21	SWIR	WHOLE ROCK	AII0107-6-053-007	-0.729	1.0334	1.4
	(k)	5.18	-54.21	SWIR	WHOLE ROCK	AII0107-6-053-012	-1.273	3.5223	1.4
	(k)	5.18	-54.21	SWIR	WHOLE ROCK	AII0107-6-053-014	-2.161	2.66671	1.4
	(k)	5.31	-54.32	SWIR	WHOLE ROCK	AII0107-6-055-012	-4.615	1.88501	1.4
	(k)	5.31	-54.32	SWIR	WHOLE ROCK	AII0107-6-055-027	-0.766	2.55389	1.4
	(k)	5.31	-54.32	SWIR	GLASS	AII0107-6-055-027	-0.861	2.09536	1.4
	(k)	7.223	-54.045	SWIR	GLASS	AII0107-6-057-025	-0.792	3.59208	1.4
	(k)	5.31	-54.32	SWIR	GLASS	AII0107-6-055-027	-0.861	2.09536	1.4
	(k)	5.31	-54.32	SWIR	WHOLE ROCK	AII0107-6-055-039	-4.197	2.26778	1.4
	(k)	5.31	-54.32	SWIR	WHOLE ROCK	AII0107-6-055-040	-0.403	7.35394	1.4
	(k)	5.137	-54.397	SWIR	WHOLE ROCK	AII0107-6-056-001	-1.516	3.189	1.4
	(k)	5.137	-54.397	SWIR	GLASS	AII0107-6-056-002	-1.509	1.87484	1.4
	(k)	5.137	-54.397	SWIR	GLASS	AII0107-6-056-002	-1.509	1.87484	1.4
	(k)	5.137	-54.397	SWIR	GLASS	AII0107-6-056-005	-1.39	1.87835	1.4
	(k)	5.137	-54.397	SWIR	GLASS	AII0107-6-056-008	-1.695	2.471	1.4
	(k)	5.137	-54.397	SWIR	GLASS	AII0107-6-056-008	-1.695	2.471	1.4
	(k)	5.137	-54.397	SWIR	GLASS	AII0107-6-056-010	-1.564	2.0633	1.4
	(k)	5.137	-54.397	SWIR	GLASS	AII0107-6-056-010	-1.564	2.0633	1.4
	(k)	5.137	-54.397	SWIR	WHOLE ROCK	AII0107-6-056-011	-1.422	2.23197	1.4
	(k)	5.137	-54.397	SWIR	WHOLE ROCK	AII0107-6-056-013	-1.449	2.4818	1.4
	(k)	5.137	-54.397	SWIR	GLASS	AII0107-6-056-013	-1.615	2.27286	1.4
	(k)	5.137	-54.397	SWIR	GLASS	AII0107-6-056-013	-1.615	2.27286	1.4
	(k)	5.137	-54.397	SWIR	GLASS	AII0107-6-056-016	-1.485	2.18993	1.4
	(k)	5.137	-54.397	SWIR	GLASS	AII0107-6-056-016	-1.485	2.18993	1.4
	(k)	5.137	-54.397	SWIR	GLASS	AII0107-6-056-027	-0.103	6.43149	1.4
	(k)	5.137	-54.397	SWIR	GLASS	AII0107-6-056-018	-1.523	1.75938	1.4
	(k)	5.137	-54.397	SWIR	GLASS	AII0107-6-056-018	-1.523	1.75938	1.4
	(k)	5.137	-54.397	SWIR	WHOLE ROCK	AII0107-6-056-021	-1.403	3.08042	1.4
	(k)	5.137	-54.397	SWIR	WHOLE ROCK	AII0107-6-056-027	0.369			with excess CaO
	(k)	5.137	-54.397	SWIR	GLASS	AII0107-6-056-028	0.035			with excess CaO
	(k)	5.137	-54.397	SWIR	GLASS	AII0107-6-056-027	-0.103	6.43149	1.4
	(k)	5.137	-54.397	SWIR	GLASS	AII0107-6-056-028	0.035			with excess CaO
	(k)	7.223	-54.045	SWIR	GLASS	AII0107-6-057-001	-1.244	2.54561	1.4
	(k)	7.223	-54.045	SWIR	GLASS	AII0107-6-057-001	-1.244	2.54561	1.4
	(k)	7.223	-54.045	SWIR	WHOLE ROCK	AII0107-6-057-002	-1.16	2.73211	1.4
	(k)	7.223	-54.045	SWIR	GLASS	AII0107-6-057-003	-1.459	2.7127	1.4
	(k)	7.223	-54.045	SWIR	GLASS	AII0107-6-057-004	-1.342	2.5784	1.4
	(k)	7.223	-54.045	SWIR	WHOLE ROCK	AII0107-6-057-005	-1.152	2.97024	1.4
	(k)	7.223	-54.045	SWIR	GLASS	AII0107-6-057-005	-1.216	2.25081	1.4
	(k)	7.223	-54.045	SWIR	GLASS	AII0107-6-057-006	-1.395	2.58534	1.4
	(k)	7.223	-54.045	SWIR	GLASS	AII0107-6-057-007	-1.4	2.45497	1.4
	(k)	7.223	-54.045	SWIR	GLASS	AII0107-6-057-008	-1.364	2.66355	1.4
	(k)	7.223	-54.045	SWIR	WHOLE ROCK	AII0107-6-057-009	-0.863	3.53539	1.4
	(k)	7.223	-54.045	SWIR	GLASS	AII0107-6-057-009	-1.031	3.6809	1.4
	(k)	7.223	-54.045	SWIR	GLASS	AII0107-6-057-012	-0.864	3.48989	1.4
	(k)	7.223	-54.045	SWIR	WHOLE ROCK	AII0107-6-057-013	-0.917	3.78741	1.4
	(k)	7.223	-54.045	SWIR	GLASS	AII0107-6-057-015	-0.764	3.462	1.4
	(k)	7.223	-54.045	SWIR	WHOLE ROCK	AII0107-6-057-016	-0.726	3.51837	1.4
	(k)	7.223	-54.045	SWIR	GLASS	AII0107-6-057-017	-0.77	3.65898	1.4
	(k)	7.223	-54.045	SWIR	GLASS	AII0107-6-057-023	-0.786	3.38144	1.4
	(k)	7.223	-54.045	SWIR	WHOLE ROCK	AII0107-6-057-025	-0.79	3.63816	1.4
	(k)	7.223	-54.045	SWIR	WHOLE ROCK	AII0107-6-057-034	-0.845	3.9878	1.4
	(k)	7.235	-53.98	SWIR	WHOLE ROCK	AII0107-6-058-002	-3.014	4.21842	1.4
	(k)	7.235	-53.98	SWIR	WHOLE ROCK	AII0107-6-058-007	-0.981	4.9816	1.4
	(k)	7.235	-53.98	SWIR	WHOLE ROCK	AII0107-6-058-012	-3.211	7.38529	1.4
	(k)	7.235	-53.98	SWIR	WHOLE ROCK	AII0107-6-058-015	-1.386	3.23319	1.4
	(k)	7.235	-53.98	SWIR	GLASS	AII0107-6-058-016	-1.098	3.75284	1.4
	(k)	9.152	-53.428	SWIR	WHOLE ROCK	AII0107-6-060-072	-2.351	4.89322	1.4
	(k)	9.152	-53.428	SWIR	WHOLE ROCK	AII0107-6-060-074	-1.975	8.45573	1.4
	(k)	9.192	-53.147	SWIR	GLASS	AII0107-6-066-035	-2.718	1.81872	1.4
	(k)	9.152	-53.428	SWIR	WHOLE ROCK	AII0107-6-060-088	-4.106	1.67179	1.4
	(k)	9.152	-53.428	SWIR	WHOLE ROCK	AII0107-6-060-092	-4.523	1.00106	1.4
	(k)	9.338	-53.388	SWIR	WHOLE ROCK	AII0107-6-063-001	-5.823	10.6123	1.4
	(k)	9.338	-53.388	SWIR	WHOLE ROCK	AII0107-6-063-034	-2.002	6.62487	1.4
	(k)	9.14	-53.32	SWIR	WHOLE ROCK	AII0107-6-064-001	-2.196	4.5282	1.4
	(k)	9.193	-53.238	SWIR	WHOLE ROCK	AII0107-6-065-010	-1.898	2.48704	1.4
	(k)	9.192	-53.147	SWIR	GLASS	AII0107-6-066-003	-0.884	3.66242	1.4
	(k)	9.192	-53.147	SWIR	WHOLE ROCK	AII0107-6-066-004	-0.785	3.21115	1.4
	(k)	9.192	-53.147	SWIR	WHOLE ROCK	AII0107-6-066-006	-0.962	2.85537	1.4
	(k)	9.192	-53.147	SWIR	GLASS	AII0107-6-066-010	-0.968	3.7131	1.4
	(k)	9.192	-53.147	SWIR	WHOLE ROCK	AII0107-6-066-013	-1.113	2.99523	1.4
	(k)	9.192	-53.147	SWIR	GLASS	AII0107-6-066-013	-0.862	3.50929	1.4
	(k)	9.192	-53.147	SWIR	WHOLE ROCK	AII0107-6-066-016	-1.197	3.2736	1.4
	(k)	9.192	-53.147	SWIR	WHOLE ROCK	AII0107-6-066-018	-1.193	3.00484	1.4
	(k)	9.192	-53.147	SWIR	GLASS	AII0107-6-066-018	-0.941	3.27802	1.4
	(k)	9.192	-53.147	SWIR	WHOLE ROCK	AII0107-6-066-026	-1.097	3.23157	1.4
	(k)	9.192	-53.147	SWIR	WHOLE ROCK	AII0107-6-066-035	-2.377	2.67402	1.4
	(k)	9.192	-53.147	SWIR	WHOLE ROCK	AII0107-6-066-040	-2.444	3.57228	1.4
	(k)	9.192	-53.147	SWIR	GLASS	AII0107-6-066-045	-3.084	2.00886	1.4
	(k)	9.192	-53.147	SWIR	GLASS	AII0107-6-066-048	-3.012	1.89698	1.4
	(k)	9.192	-53.147	SWIR	WHOLE ROCK	AII0107-6-066-052	-2.376	3.90668	1.4
	(k)	9.192	-53.147	SWIR	WHOLE ROCK	AII0107-6-066-056	-4.276	2.11166	1.4
	(k)	9.192	-53.147	SWIR	WHOLE ROCK	AII0107-6-066-060	0.703			with excess CaO
	(k)	9.192	-53.147	SWIR	GLASS	AII0107-6-066-060	-0.91	1.13358	1.4
	(k)	9.192	-53.147	SWIR	WHOLE ROCK	AII0107-6-066-061	0.154			with excess CaO
	(k)	9.192	-53.147	SWIR	WHOLE ROCK	AII0107-6-066-069	-2.457	2.41835	1.4
	(k)	9.192	-53.147	SWIR	GLASS	AII0107-6-066-069	-1.132	1.41004	1.4
	(k)	16.91	-52.293	SWIR	WHOLE ROCK	AGU0022-001-001	-0.51	4.01648	1.4
	(k)	16.91	-52.293	SWIR	GLASS	AGU0022-001-004	-0.442	3.55352	1.4
	(k)	16.91	-52.293	SWIR	GLASS	AGU0022-001-013	-0.579	2.94708	1.4
	(k)	16.91	-52.293	SWIR	GLASS	AGU0022-001-016	-0.58	3.71563	1.4
	(k)	16.91	-52.293	SWIR	GLASS	AGU0022-001-017	-0.667	4.08459	1.4
	(k)	16.91	-52.293	SWIR	GLASS	AGU0022-001-030	-0.702	3.35506	1.4
	(k)	19.097	-54.76	SWIR	GLASS	AGU0022-005-004	-1.435	4.96704	1.4
	(k)	19.097	-54.76	SWIR	GLASS	AGU0022-005-006	-1.094	5.35783	1.4
	(k)	19.097	-54.76	SWIR	GLASS	AGU0022-005-007	-1.141	4.01022	1.4
	(k)	19.097	-54.76	SWIR	GLASS	AGU0022-005-014	-1.805	3.4065	1.4
	(k)	19.097	-54.76	SWIR	GLASS	AGU0022-005-018	-1.073	3.92637	1.4
	(k)	19.097	-54.76	SWIR	GLASS	AGU0022-005-019	-1.144	3.72096	1.4
	(k)	19.097	-54.76	SWIR	GLASS	AGU0022-005-038	-1.334	3.69415	1.4
	(k)	19.097	-54.76	SWIR	GLASS	AGU0022-005-075	-1.295	4.42653	1.4
	(k)	21.833	-53.023	SWIR	GLASS	AGU0022-007-001	-1.034	3.63318	1.4
	(k)	21.833	-53.023	SWIR	GLASS	AGU0022-007-002	-1.169	3.88962	1.4
	(k)	22.83	-53.158	SWIR	GLASS	AGU0022-009-001	-0.389	3.69457	1.4
	(k)	22.83	-53.158	SWIR	WHOLE ROCK	AGU0022-009-002	-0.344	4.61506	1.4
	(k)	65.72	-23.52	SWIR	GLASS	ARGCIRC-116-001	-0.098	0.0178981	1.4
	(k)	67.52	-26.62	SWIR	GLASS	ARGCIRC-110-016	-2.068	4.8235	1.4
	(k)	69.833	-24.35	SWIR	GLASS	ARGCIRC-107-010	-0.072	4.63295	1.4
	(k)	69.833	-24.35	SWIR	WHOLE ROCK	ARGCIRC-107	-0.225	6.1375	1.4
	(k)	69.833	-24.35	SWIR	WHOLE ROCK	ARGCIRC-107	-0.225	6.1375	1.4
	(k)	69.833	-24.35	SWIR	GLASS	ARGCIRC-107-012	-0.149	4.78608	1.4
	(k)	69.833	-24.35	SWIR	GLASS	ARGCIRC-107-013	-0.196	4.70467	1.4
	(k)	69.833	-24.35	SWIR	GLASS	ARGCIRC-107-014	-0.177	5.12032	1.4
	(k)	67.52	-26.62	SWIR	GLASS	ARGCIRC-110-001	-2.078	4.99504	1.4
	(k)	67.52	-26.62	SWIR	GLASS	ARGCIRC-110-012D	-1.807	5.11147	1.4
	(k)	67.52	-26.62	SWIR	GLASS	ARGCIRC-110-012E	-2.176	5.21771	1.4
	(k)	67.52	-26.62	SWIR	GLASS	ARGCIRC-110-015	-2.059	5.20462	1.4
	(k)	67.52	-26.62	SWIR	GLASS	ARGCIRC-110-017	0.203			with excess CaO
	(k)	67.52	-26.62	SWIR	GLASS	ARGCIRC-110-018	-1.716	5.4133	1.4
	(k)	67.52	-26.62	SWIR	GLASS	ARGCIRC-110-019	-2.027	5.05491	1.4
	(k)	67.52	-26.62	SWIR	GLASS	ARGCIRC-110-020	-1.729	5.63279	1.4
	(k)	69.833	-24.35	SWIR	GLASS	ARGCIRC-107-001-VG5937	-0.267	4.21312	1.4
	(k)	69.833	-24.35	SWIR	GLASS	ARGCIRC-107-001-VG5938	-0.176	4.32735	1.4
	(k)	69.833	-24.35	SWIR	GLASS	ARGCIRC-107-002	-0.341	4.69485	1.4
	(k)	69.833	-24.35	SWIR	GLASS	ARGCIRC-107-011	-0.055	4.76992	1.4
	(k)	67.52	-26.62	SWIR	GLASS	ARGCIRC-110-002	-1.731	5.6149	1.4
	(k)	67.52	-26.62	SWIR	GLASS	ARGCIRC-110-004	-2.736	4.99678	1.4
	(k)	67.52	-26.62	SWIR	GLASS	ARGCIRC-110-010	-2.035	4.80265	1.4
	(k)	67.52	-26.62	SWIR	GLASS	ARGCIRC-110-011	-1.729	5.60447	1.4
	(k)	67.52	-26.62	SWIR	GLASS	ARGCIRC-110-012A	-2.095	5.11856	1.4
	(k)	67.52	-26.62	SWIR	GLASS	ARGCIRC-110-012B	-1.985	4.95254	1.4
	(k)	67.52	-26.62	SWIR	GLASS	ARGCIRC-110-013	-2.01	5.23079	1.4
	(k)	67.52	-26.62	SWIR	GLASS	ARGCIRC-110-014	-2.736	5.09027	1.4
	(k)	-1.728	-55.338	SWIR	GLASS	CHN0115-4-003-003	0.323			with excess CaO
	(k)	-1.728	-55.338	SWIR	WHOLE ROCK	CHN0115-4-003-002	0.546			with excess CaO
	(k)	-1.728	-55.338	SWIR	GLASS	CHN0115-4-003-005	0.423			with excess CaO
	(k)	-1.728	-55.338	SWIR	GLASS	CHN0115-4-003-007	0.381			with excess CaO
	(k)	-1.728	-55.338	SWIR	GLASS	CHN0115-4-003-012	0.387			with excess CaO
	(k)	-1.728	-55.338	SWIR	GLASS	CHN0115-4-003-014	0.376			with excess CaO
	(k)	-0.01	-54.68	SWIR	WHOLE ROCK	CHN0115-4-005-001	-3.28	2.01886	1.4
	(k)	-0.01	-54.68	SWIR	GLASS	CHN0115-4-005-001	-3.858	0.875379	1.4
	(k)	-0.01	-54.68	SWIR	WHOLE ROCK	CHN0115-4-005-002	-2.824	0.46259	1.4
	(k)	-0.01	-54.68	SWIR	WHOLE ROCK	CHN0115-4-005-002	-2.824	0.406206	1.4
	(k)	-0.01	-54.68	SWIR	GLASS	CHN0115-4-005-004	-4.022	1.06741	1.4
	(k)	-0.01	-54.68	SWIR	GLASS	CHN0115-4-005-012	-3.821	0.535567	1.4
	(k)	-0.01	-54.68	SWIR	GLASS	CHN0115-4-005-030	-2.995	0.861492	1.4
	(k)	4.052	-54.228	SWIR	GLASS	CHN0115-4-008-002	1.171			with excess CaO
	(k)	4.052	-54.228	SWIR	GLASS	CHN0115-4-008-002	-0.45	0.423468	1.4
	(k)	4.052	-54.228	SWIR	GLASS	CHN0115-4-008-003	-0.387	0.341919	1.4
	(k)	4.052	-54.228	SWIR	GLASS	CHN0115-4-008-003	-0.387	0.341919	1.4
	(k)	4.052	-54.228	SWIR	GLASS	CHN0115-4-008-004	0.786			with excess CaO
	(k)	4.052	-54.228	SWIR	GLASS	CHN0115-4-008-006	-0.527	0.578095	1.4
	(k)	4.052	-54.228	SWIR	GLASS	CHN0115-4-008-006	-0.527	0.578095	1.4
	(k)	4.052	-54.228	SWIR	GLASS	CHN0115-4-008-012	0.785			with excess CaO
	(k)	-1.728	-55.338	SWIR	GLASS	CHN0115-4-003-002	-0.147	2.84457	1.4
	(k)	-0.01	-54.68	SWIR	GLASS	CHN0115-4-005-001	-4.016	2.06965	1.4
	(k)	-0.01	-54.68	SWIR	WHOLE ROCK	CHN0115-4-005-001	-3.28	1.9784	1.4
	(k)	-0.01	-54.68	SWIR	GLASS	CHN0115-4-005-002	-4.029	3.59219	1.4
	(k)	-0.01	-54.68	SWIR	GLASS	CHN0115-4-005-002	-2.806	0.519884	1.4
	(k)	-0.01	-54.68	SWIR	GLASS	CHN0115-4-005-003	-3.137	0.928227	1.4
	(k)	-0.01	-54.68	SWIR	GLASS	CHN0115-4-005-004	-4.022	1.06741	1.4
	(k)	-0.01	-54.68	SWIR	GLASS	CHN0115-4-005-032	-4.152	0.28619	1.4
	(k)	-0.01	-54.68	SWIR	GLASS	CHN0115-4-005-033	-3.893	0.669535	1.4
	(k)	4.052	-54.228	SWIR	GLASS	CHN0115-4-008-001	-0.793	1.62077	1.4
	(k)	70.054	-25.66	SWIR	GLASS	CHRRODR-2-003-001	-0.993	3.45327	1.4
	(k)	57.233	-31.882	SWIR	GLASS	CON2709-003-025	-1.881	3.22243	1.4
	(k)	57.233	-31.882	SWIR	GLASS	CON2709-003-028	-2.409	2.77561	1.4
	(k)	57.233	-31.882	SWIR	GLASS	CON2709-003-028	-2.12292	1.50431	1.4
	(k)	57.233	-31.882	SWIR	WHOLE ROCK	CON2709-003-045	-1.58045	3.66686	1.4
	(k)	57.233	-31.882	SWIR	GLASS	CON2709-003-053	-2.325	2.50031	1.4
	(k)	57.233	-31.882	SWIR	GLASS	CON2709-003-058	-2.356	2.60324	1.4
	(k)	56.931	-33.628	SWIR	GLASS	CON2709-044-003	-1.066	4.3106	1.4
	(k)	56.931	-33.628	SWIR	GLASS	CON2709-044-004	-1.422	4.2056	1.4
	(k)	56.931	-33.628	SWIR	GLASS	CON2709-044-014	-1.223	4.29729	1.4
	(k)	56.931	-33.628	SWIR	GLASS	CON2709-044-016	-1.216	4.02894	1.4
	(k)	56.931	-33.628	SWIR	GLASS	CON2709-044-018	-0.696	3.15547	1.4
	(k)	56.931	-33.628	SWIR	GLASS	CON2709-044-020	-1.162	3.8025	1.4
	(k)	66.429	-27.403	SWIR	GLASS	CHRRODR-3-001-001	-1.95	6.95554	1.4
	(k)	57.233	-31.882	SWIR	WHOLE ROCK	CON2709-003-028	-1.62639	3.75683	1.4
	(k)	57.233	-31.882	SWIR	GLASS	CON2709-003-029	-2.381	2.62105	1.4
	(k)	57.233	-31.882	SWIR	GLASS	CON2709-003-032	-2.441	2.39441	1.4
	(k)	57.233	-31.882	SWIR	WHOLE ROCK	CON2709-003-066	-1.59949	4.00596	1.4
	(k)	56.931	-33.628	SWIR	GLASS	CON2709-044-011	-0.973	4.52119	1.4
	(k)	56.931	-33.628	SWIR	GLASS	CON2709-044-012	-2.145	3.49657	1.4
	(k)	56.931	-33.628	SWIR	GLASS	CON2709-044-013	-1.166	4.17722	1.4
	(k)	56.931	-33.628	SWIR	GLASS	CON2709-044-021	-1.304	3.85909	1.4
	(k)	56.931	-33.628	SWIR	GLASS	CON2709-044-025	-1.135	3.82704	1.4
	(k)	56.931	-33.628	SWIR	GLASS	CON2709-044-026	-2.103	2.88388	1.4
	(k)	57.557	-31.795	SWIR	GLASS	DIS0208-004-010A	-2.832	3.12515	1.4
	(k)	57.557	-31.795	SWIR	GLASS	DIS0208-004-011D	-2.77	3.61142	1.4
	(k)	57.557	-31.795	SWIR	GLASS	DIS0208-004-011J	-2.277	3.45325	1.4
	(k)	57.557	-31.795	SWIR	GLASS	DIS0208-004-013C	-2.055	2.97793	1.4
	(k)	57.593	-31.782	SWIR	GLASS	DIS0208-007-018T	-2.494	2.34498	1.4
	(k)	57.593	-31.782	SWIR	GLASS	DIS0208-007-019A	-2.515	2.68719	1.4
	(k)	57.527	-31.838	SWIR	GLASS	DIS0208-008-022D	-2.354	3.55693	1.4
	(k)	57.527	-31.838	SWIR	GLASS	DIS0208-008-023D	-2.371	3.28138	1.4
	(k)	57.478	-31.827	SWIR	GLASS	DIS0208-009-029L	-2.228	3.50735	1.4
	(k)	65.683	-27.6	SWIR	GLASS	DIS0208-010-031A	-1.968	5.29319	1.4
	(k)	65.683	-27.6	SWIR	GLASS	DIS0208-010-031A	-1.885	5.34279	1.4
	(k)	65.748	-27.615	SWIR	GLASS	DIS0208-011-035A	-2.071	5.51022	1.4
	(k)	65.748	-27.615	SWIR	GLASS	DIS0208-011-035A	-2.032	5.41782	1.4
	(k)	65.878	-27.55	SWIR	GLASS	DIS0208-013-040M	-2.372	6.03026	1.4
	(k)	65.878	-27.55	SWIR	GLASS	DIS0208-013-040M	-2.283	5.97095	1.4
	(k)	66.027	-27.637	SWIR	GLASS	DIS0208-016-047G	-2.589	4.92757	1.4
	(k)	66.027	-27.637	SWIR	GLASS	DIS0208-016-047G	-2.428	4.9559	1.4
	(k)	57.26	-31.36	SWIR	GLASS	DIS0208-003-005C	-1.581	3.18559	1.4
	(k)	57.642	-31.773	SWIR	GLASS	DIS0208-005-015A	-1.697	3.76676	1.4
	(k)	57.593	-31.782	SWIR	GLASS	DIS0208-007-016A	-2.444	2.76283	1.4
	(k)	57.593	-31.782	SWIR	GLASS	DIS0208-007-017B	-2.481	2.67573	1.4
	(k)	57.593	-31.782	SWIR	GLASS	DIS0208-007-018P	-2.158	3.03738	1.4
	(k)	57.527	-31.838	SWIR	GLASS	DIS0208-008-027A	-2.988	3.41824	1.4
	(k)	57.478	-31.827	SWIR	GLASS	DIS0208-009-028B	-2.323	3.08538	1.4
	(k)	57.478	-31.827	SWIR	GLASS	DIS0208-009-029A	-2.247	3.26441	1.4
	(k)	57.478	-31.827	SWIR	GLASS	DIS0208-009-029D	-2.698	3.79238	1.4
	(k)	65.748	-27.615	SWIR	GLASS	DIS0208-011-034D	-2.059	5.78311	1.4
	(k)	65.748	-27.615	SWIR	GLASS	DIS0208-011-034H	-1.885	5.47429	1.4
	(k)	65.748	-27.615	SWIR	GLASS	DIS0208-011-034H	-1.904	5.40013	1.4
	(k)	65.94	-27.613	SWIR	GLASS	DIS0208-012-036B	-2.134	6.04332	1.4
	(k)	65.94	-27.613	SWIR	GLASS	DIS0208-012-037F	-2.076	5.97435	1.4
	(k)	65.94	-27.613	SWIR	GLASS	DIS0208-012-037F	-1.94	5.93233	1.4
	(k)	66.16	-27.555	SWIR	GLASS	DIS0208-014-041D	-2.04	5.6926	1.4
	(k)	66.16	-27.555	SWIR	GLASS	DIS0208-014-041D	-1.884	5.67512	1.4
	(k)	66.317	-27.545	SWIR	GLASS	DIS0208-015-043C	-2.064	5.6124	1.4
	(k)	66.027	-27.637	SWIR	GLASS	DIS0208-016-046A	-2.531	5.106	1.4
	(k)	66.027	-27.637	SWIR	GLASS	DIS0208-016-046G	-2.618	5.16285	1.4
	(a) Yu X, Dick HJB (2020) Plate-driven micro-hotspots and the evolution of the Dragon Flag melting anomaly, Southwest Indian Ridge. Earth Planet Sci Lett 531:116002
	(b) Yang AY, Zhou MF, Zhao TP, Deng XG, Qi L, Xu J F (2014) Chalcophile elemental compositions of morbs from the ultraslow-spreading southwest indian ridge and controls of lithospheric structure on s-saturated differentiation. Chem Geol 382: 1-13
	(c) Yu M, Su X, Tao CH (2013) Petrological and Geochemical Features of Basalts at 49. 6°E and 50. 5°E Hydrothermal Fields along the Southwest Indian Ridge. Geoscience 27: 497–508 (in Chinese)
	(d) Yang AY, Zhao T-P, Zhou M-F, Deng X-G (2017) Isotopically enriched N-MORB: A new geochemical signature of off-axis plume-ridge interaction-A case study at 50°28′E, Southwest Indian Ridge. J Geophys Res: Solid Earth 122(1):191-213
	(e) Yang AY, Zhao T, Zhou M, Deng X, Wang G, Li J (2013) Os isotopic compositions of MORBs from the ultra-slow spreading Southwest Indian Ridge: Constraints on the assimilation and fractional crystallization (AFC) processes. Lithos 179: 28–35
	(f) Le Voyer M, Hauri EH, Cottrell E, Kelley KA, Salters VJM, Langmuir CH, Hilton DR, Barry PH, Füri E (2019) Carbon Fluxes and Primary Magma CO2 Contents Along the Global Mid-Ocean Ridge System. Geochem Geophys Geosyst 20(3):1387-1424
	(g) Ou Q, Nichols ARL, Carvalho BB, Zi F, Wang K, Li J, Zhang L. Liu JY (2021) The role of axial discontinuities in oceanic crustal evolution: Evidence from elemental and Mo-Sr-Nd-Pb-Hf isotopic compositions of rock suites from the Southwest Indian Ridge (42°–53°E). Mar Geol 442: 106626
	(h) Dong Z, Tao C, Liang J, Liao S, Li W, Zhang G, Cao Z (2021) Geochemistry of Basalts from Southwest Indian Ridge 64◦ E: Implications for the Mantle Heterogeneity East of the Melville Transform. Minerals 11: 175
	(i) Paquet M, Cannat M, Brunelli D, Hamelin C, Humler E (2016) Effect of melt/mantle interactions on MORB chemistry at the easternmost Southwest Indian Ridge (61°–67°E). Geochem Geophys Geosyst 17(11):4605-4640
	(j) Li W, Tao C, Zhang W, Liu J, Liang J, Liao S, Yang W (2019) Melt Inclusions in Plagioclase Macrocrysts at Mountain Jourdanne, Southwest Indian Ridge (~64° E): Implications for an Enriched Mantle Source and Shallow Magmatic Processes. Minerals 9: 493
	(k) Data extracted from the EarthChem library (http://www.earthchem.org/library/search)
	(l) Li W (2017) Petrogeochemical characteristics of basalts from Southwest Indian Ridge: Implications for magmatic processes at ultra-slow spreading ridge. Institute of Geophysics & Geomatics, Doctor thesis.

## Sheet: PlotDat1
Source sheet	Sheet3	-6	5.75572e-07	0	0	-6	0
Plot name	ProbDens1	-5.91176	7.7574e-07	0.75	0	23.9118	0
Plot Type	16	-5.82353	1.03935e-06	0.75	82
1st free col	9	-5.73529	1.37953e-06	0	82
Sigma Level	1	-5.64706	1.8209e-06	0	0
Absolute Errs	TRUE	-5.55882	2.39213e-06	ErrBox	ErrBox
Symbol Type	1	-5.47059	3.1314e-06	0.75	0
Inverse Plot	FALSE	-5.38235	4.08163e-06	1.5	0
Color Plot	TRUE	-5.29412	5.29679e-06	1.5	97
3D plot	FALSE	-5.20588	6.84575e-06	0.75	97
Linear	FALSE	-5.11765	8.81672e-06	0.75	0
Data Range	C:D	-5.02941	1.13103e-05	ErrBox	ErrBox
Filled Symbols	TRUE	-4.94118	1.44491e-05	1.5	0
ConcAge	FALSE	-4.85294	1.83849e-05	2.25	0
ConcSwap	FALSE	-4.76471	2.33012e-05	2.25	136
1st Symbol-row	1	-4.67647	2.94282e-05	1.5	136
		-4.58824	3.70182e-05	1.5	0
		-4.5	4.63953e-05	ErrBox	ErrBox
		-4.41176	5.79359e-05	2.25	0
		-4.32353	7.20923e-05	3	0
		-4.23529	8.936e-05	3	152
		-4.14706	0.000110363	2.25	152
		-4.05882	0.000135812	2.25	0
		-3.97059	0.000166519	ErrBox	ErrBox
		-3.88235	0.000203437	3	0
		-3.79412	0.000247649	3.75	0
		-3.70588	0.000300382	3.75	285
		-3.61765	0.000363038	3	285
		-3.52941	0.000437194	3	0
		-3.44118	0.000524621	ErrBox	ErrBox
		-3.35294	0.000627311	3.75	0
		-3.26471	0.000747454	4.5	0
		-3.17647	0.000887482	4.5	210
		-3.08824	0.00105006	3.75	210
		-3	0.00123809	3.75	0
		-2.91176	0.00145473	ErrBox	ErrBox
		-2.82353	0.0017034	4.5	0
		-2.73529	0.00198775	5.25	0
		-2.64706	0.00231166	5.25	142
		-2.55882	0.00267925	4.5	142
		-2.47059	0.00309486	4.5	0
		-2.38235	0.00356298	ErrBox	ErrBox
		-2.29412	0.00408831	5.25	0
		-2.20588	0.00467564	6	0
		-2.11765	0.00532988	6	101
		-2.02941	0.00605595	5.25	101
		-1.94118	0.00685884	5.25	0
		-1.85294	0.00774344	ErrBox	ErrBox
		-1.76471	0.00871456	6	0
		-1.67647	0.00977686	6.75	0
		-1.58824	0.0109348	6.75	100
		-1.5	0.0121926	6	100
		-1.41176	0.013554	6	0
		-1.32353	0.0150226	ErrBox	ErrBox
		-1.23529	0.0166015	6.75	0
		-1.14706	0.0182932	7.5	0
		-1.05882	0.0200997	7.5	42
		-0.970588	0.0220228	6.75	42
		-0.882353	0.0240632	6.75	0
		-0.794118	0.0262214	ErrBox	ErrBox
		-0.705882	0.0284972	7.5	0
		-0.617647	0.0308897	8.25	0
		-0.529412	0.0333975	8.25	18
		-0.441176	0.0360186	7.5	18
		-0.352941	0.0387505	7.5	0
		-0.264706	0.0415901	ErrBox	ErrBox
		-0.176471	0.0445339	8.25	0
		-0.0882353	0.0475778	9	0
		3.88578e-16	0.0507175	9	13
		0.0882353	0.0539483	8.25	13
		0.176471	0.057265	8.25	0
		0.264706	0.0606624	ErrBox	ErrBox
		0.352941	0.0641348	9	0
		0.441176	0.0676765	9.75	0
		0.529412	0.0712816	9.75	7
		0.617647	0.0749438	9	7
		0.705882	0.078657	9	0
		0.794118	0.0824145	ErrBox	ErrBox
		0.882353	0.0862099	9.75	0
		0.970588	0.0900361	10.5	0
		1.05882	0.0938861	10.5	6
		1.14706	0.0977524	9.75	6
		1.23529	0.101627	9.75	0
		1.32353	0.105503	ErrBox	ErrBox
		1.41176	0.10937	10.5	0
		1.5	0.11322	11.25	0
		1.58824	0.117044	11.25	3
		1.67647	0.12083	10.5	3
		1.76471	0.124569	10.5	0
		1.85294	0.128249	ErrBox	ErrBox
		1.94118	0.131859	11.25	0
		2.02941	0.135385	12	0
		2.11765	0.138815	12	1
		2.20588	0.142136	11.25	1
		2.29412	0.145333	11.25	0
		2.38235	0.148393	ErrBox	ErrBox
		2.47059	0.151302	12	0
		2.55882	0.154046	12.75	0
		2.64706	0.15661	12.75	2
		2.73529	0.158981	12	2
		2.82353	0.161146	12	0
		2.91176	0.163093	ErrBox	ErrBox
		3	0.16481	12.75	0
		3.08824	0.166286	13.5	0
		3.17647	0.167513	13.5	2
		3.26471	0.168482	12.75	2
		3.35294	0.169188	12.75	0
		3.44118	0.169626	ErrBox	ErrBox
		3.52941	0.169792	13.5	0
		3.61765	0.169686	14.25	0
		3.70588	0.169308	14.25	2
		3.79412	0.168661	13.5	2
		3.88235	0.167749	13.5	0
		3.97059	0.166578	ErrBox	ErrBox
		4.05882	0.165156	15	0
		4.14706	0.163492	15.75	0
		4.23529	0.161597	15.75	1
		4.32353	0.159483	15	1
		4.41176	0.157162	15	0
		4.5	0.15465	ErrBox	ErrBox
		4.58824	0.151959	15.75	0
		4.67647	0.149106	16.5	0
		4.76471	0.146106	16.5	2
		4.85294	0.142975	15.75	2
		4.94118	0.139728	15.75	0
		5.02941	0.13638	ErrBox	ErrBox
		5.11765	0.132948	17.25	0
		5.20588	0.129445	18	0
		5.29412	0.125886	18	1
		5.38235	0.122283	17.25	1
		5.47059	0.118651	17.25	0
		5.55882	0.114999	ErrBox	ErrBox
		5.64706	0.111341
		5.73529	0.107685
		5.82353	0.104041
		5.91176	0.100417
		6	0.0968226
		6.08824	0.0932633
		6.17647	0.089746
		6.26471	0.0862763
		6.35294	0.0828595
		6.44118	0.0795002
		6.52941	0.0762026
		6.61765	0.0729704
		6.70588	0.0698069
		6.79412	0.0667154
		6.88235	0.0636983
		6.97059	0.0607583
		7.05882	0.0578974
		7.14706	0.0551176
		7.23529	0.0524206
		7.32353	0.0498078
		7.41176	0.0472804
		7.5	0.0448394
		7.58824	0.0424855
		7.67647	0.0402192
		7.76471	0.0380406
		7.85294	0.0359498
		7.94118	0.0339464
		8.02941	0.0320298
		8.11765	0.0301992
		8.20588	0.0284534
		8.29412	0.0267912
		8.38235	0.025211
		8.47059	0.023711
		8.55882	0.0222891
		8.64706	0.0209432
		8.73529	0.019671
		8.82353	0.01847
		8.91176	0.0173376
		9	0.0162711
		9.08824	0.0152678
		9.17647	0.0143249
		9.26471	0.0134397
		9.35294	0.0126093
		9.44118	0.0118311
		9.52941	0.0111022
		9.61765	0.01042
		9.70588	0.00978188
		9.79412	0.00918543
		9.88235	0.00862816
		9.97059	0.00810777
		10.0588	0.00762203
		10.1471	0.00716882
		10.2353	0.00674615
		10.3235	0.0063521
		10.4118	0.00598489
		10.5	0.00564282
		10.5882	0.00532428
		10.6765	0.00502777
		10.7647	0.00475186
		10.8529	0.00449524
		10.9412	0.00425664
		11.0294	0.00403488
		11.1176	0.00382886
		11.2059	0.00363752
		11.2941	0.00345988
		11.3824	0.00329501
		11.4706	0.00314203
		11.5588	0.0030001
		11.6471	0.00286845
		11.7353	0.00274633
		11.8235	0.00263305
		11.9118	0.00252794
		12	0.00243037
		12.0882	0.00233976
		12.1765	0.00225555
		12.2647	0.00217722
		12.3529	0.00210428
		12.4412	0.00203627
		12.5294	0.00197277
		12.6176	0.00191339
		12.7059	0.00185774
		12.7941	0.00180551
		12.8824	0.00175637
		12.9706	0.00171006
		13.0588	0.0016663
		13.1471	0.00162486
		13.2353	0.00158555
		13.3235	0.00154816
		13.4118	0.00151253
		13.5	0.00147853
		13.5882	0.00144601
		13.6765	0.00141486
		13.7647	0.00138497
		13.8529	0.00135625
		13.9412	0.00132863
		14.0294	0.00130201
		14.1176	0.00127634
		14.2059	0.00125155
		14.2941	0.00122757
		14.3824	0.00120435
		14.4706	0.00118183
		14.5588	0.00115994
		14.6471	0.00113863
		14.7353	0.00111784
		14.8235	0.00109749
		14.9118	0.00107752
		15	0.00105788
		15.0882	0.0010385
		15.1765	0.00101931
		15.2647	0.00100025
		15.3529	0.000981266
		15.4412	0.0009623
		15.5294	0.0009433
		15.6176	0.000924223
		15.7059	0.000905027
		15.7941	0.000885683
		15.8824	0.000866163
		15.9706	0.00084645
		16.0588	0.000826535
		16.1471	0.000806415
		16.2353	0.000786097
		16.3235	0.000765591
		16.4118	0.000744914
		16.5	0.000724094
		16.5882	0.000703156
		16.6765	0.000682133
		16.7647	0.000661058
		16.8529	0.000639968
		16.9412	0.000618899
		17.0294	0.000597889
		17.1176	0.000576974
		17.2059	0.000556186
		17.2941	0.000535557
		17.3824	0.000515118
		17.4706	0.000494896
		17.5588	0.000474915
		17.6471	0.000455195
		17.7353	0.000435756
		17.8235	0.000416616
		17.9118	0.000397788
		18	0.000379286
		18.0882	0.000361122
		18.1765	0.000343308
		18.2647	0.000325857
		18.3529	0.000308778
		18.4412	0.000292084
		18.5294	0.000275787
		18.6176	0.000259899
		18.7059	0.000244434
		18.7941	0.000229407
		18.8824	0.000214832
		18.9706	0.000200723
		19.0588	0.000187095
		19.1471	0.000173962
		19.2353	0.000161338
		19.3235	0.000149236
		19.4118	0.000137666
		19.5	0.000126638
		19.5882	0.000116157
		19.6765	0.00010623
		19.7647	9.6857e-05
		19.8529	8.80381e-05
		19.9412	7.97708e-05
		20.0294	7.2048e-05
		20.1176	6.48603e-05
		20.2059	5.81961e-05
		20.2941	5.20403e-05
		20.3824	4.63775e-05
		20.4706	4.11881e-05
		20.5588	3.64516e-05
		20.6471	3.21459e-05
		20.7353	2.82477e-05
		20.8235	2.47329e-05
		20.9118	2.15765e-05
		21	1.8754e-05
		21.0882	1.62415e-05
		21.1765	1.40134e-05
		21.2647	1.2046e-05
		21.3529	1.0316e-05
		21.4412	8.8013e-06
		21.5294	7.48061e-06
		21.6176	6.33398e-06
		21.7059	5.34269e-06
		21.7941	4.48932e-06
		21.8824	3.75781e-06
		21.9706	3.13341e-06
		22.0588	2.60269e-06
		22.1471	2.15351e-06
		22.2353	1.77496e-06
		22.3235	1.45674e-06
		22.4118	1.19142e-06
		22.5	9.7062e-07
		22.5882	7.87655e-07
		22.6765	6.36683e-07
		22.7647	5.12635e-07
		22.8529	4.10471e-07
		22.9412	3.27961e-07
		23.0294	2.61004e-07
		23.1176	2.069e-07
		23.2059	1.62819e-07
		23.2941	1.28086e-07
		23.3824	1.00362e-07
		23.4706	7.83277e-08
		23.5588	6.08884e-08
		23.6471	4.71443e-08
		23.7353	3.63579e-08
		23.8235	2.79282e-08
		23.9118	2.13679e-08
		IsoLine	IsoLine

## Sheet: PlotDat2
Source sheet	Sheet3	-4	2.53347e-06	1.4	0	-4	0
Plot name	ProbDens2	-3.94706	2.97193e-06	1.85	0	13.9471	0
Plot Type	16	-3.89412	3.48151e-06	1.85	1
1st free col	9	-3.84118	4.07289e-06	1.4	1
Sigma Level	1	-3.78824	4.75822e-06	1.4	0
Absolute Errs	TRUE	-3.73529	5.55126e-06	ErrBox	ErrBox
Symbol Type	1	-3.68235	6.48521e-06	1.85	0
Inverse Plot	FALSE	-3.62941	7.54623e-06	2.3	0
Color Plot	TRUE	-3.57647	8.76889e-06	2.3	3
3D plot	FALSE	-3.52353	1.01942e-05	1.85	3
Linear	FALSE	-3.47059	1.18146e-05	1.85	0
Data Range	C2:D67	-3.41765	1.36911e-05	ErrBox	ErrBox
Filled Symbols	TRUE	-3.36471	1.58423e-05	2.3	0
ConcAge	FALSE	-3.31176	1.83239e-05	2.75	0
ConcSwap	FALSE	-3.25882	2.11424e-05	2.75	1
1st Symbol-row	1	-3.20588	2.43608e-05	2.3	1
		-3.15294	2.80479e-05	2.3	0
		-3.1	3.22305e-05	ErrBox	ErrBox
		-3.04706	3.69677e-05	2.75	0
		-2.99412	4.2345e-05	3.2	0
		-2.94118	4.8458e-05	3.2	4
		-2.88824	5.53612e-05	2.75	4
		-2.83529	6.31807e-05	2.75	0
		-2.78235	7.2045e-05	ErrBox	ErrBox
		-2.72941	8.20243e-05	3.2	0
		-2.67647	9.32443e-05	3.65	0
		-2.62353	0.000105858	3.65	4
		-2.57059	0.000120023	3.2	4
		-2.51765	0.000135906	3.2	0
		-2.46471	0.000153709	ErrBox	ErrBox
		-2.41176	0.000173581	3.65	0
		-2.35882	0.000195806	4.1	0
		-2.30588	0.000220592	4.1	8
		-2.25294	0.000248161	3.65	8
		-2.2	0.000278874	3.65	0
		-2.14706	0.00031295	ErrBox	ErrBox
		-2.09412	0.000350749	4.1	0
		-2.04118	0.000392614	4.55	0
		-1.98824	0.000438943	4.55	12
		-1.93529	0.000490089	4.1	12
		-1.88235	0.00054655	4.1	0
		-1.82941	0.000608721	ErrBox	ErrBox
		-1.77647	0.000677125	4.55	0
		-1.72353	0.000752323	5	0
		-1.67059	0.000834846	5	11
		-1.61765	0.000925255	4.55	11
		-1.56471	0.00102421	4.55	0
		-1.51176	0.0011324	ErrBox	ErrBox
		-1.45882	0.00125049	5	0
		-1.40588	0.00137923	5.45	0
		-1.35294	0.00151941	5.45	7
		-1.3	0.00167187	5	7
		-1.24706	0.00183744	5	0
		-1.19412	0.00201705	ErrBox	ErrBox
		-1.14118	0.00221167	5.45	0
		-1.08824	0.00242219	5.9	0
		-1.03529	0.00264969	5.9	7
		-0.982353	0.00289523	5.45	7
		-0.929412	0.00315992	5.45	0
		-0.876471	0.00344493	ErrBox	ErrBox
		-0.823529	0.00375139	5.9	0
		-0.770588	0.00408055	6.35	0
		-0.717647	0.00443365	6.35	2
		-0.664706	0.00481201	5.9	2
		-0.611765	0.00521693	5.9	0
		-0.558824	0.00564979	ErrBox	ErrBox
		-0.505882	0.00611196	7.7	0
		-0.452941	0.00660488	8.15	0
		-0.4	0.00712998	8.15	1
		-0.347059	0.00768873	7.7	1
		-0.294118	0.00828263	7.7	0
		-0.241176	0.00891318	ErrBox	ErrBox
		-0.188235	0.0095819	8.6	0
		-0.135294	0.0102903	9.05	0
		-0.0823529	0.01104	9.05	1
		-0.0294118	0.0118326	8.6	1
		0.0235294	0.0126695	8.6	0
		0.0764706	0.0135523	ErrBox	ErrBox
		0.129412	0.0144827	9.05	0
		0.182353	0.015462	9.5	0
		0.235294	0.016492	9.5	1
		0.288235	0.0175741	9.05	1
		0.341176	0.0187098	9.05	0
		0.394118	0.0199006	ErrBox	ErrBox
		0.447059	0.0211479
		0.5	0.0224532
		0.552941	0.0238179
		0.605882	0.0252434
		0.658824	0.0267308
		0.711765	0.0282816
		0.764706	0.0298968
		0.817647	0.0315776
		0.870588	0.0333252
		0.923529	0.0351404
		0.976471	0.0370243
		1.02941	0.0389776
		1.08235	0.0410012
		1.13529	0.0430957
		1.18824	0.0452616
		1.24118	0.0474993
		1.29412	0.0498093
		1.34706	0.0521917
		1.4	0.0546466
		1.45294	0.0571738
		1.50588	0.0597733
		1.55882	0.0624445
		1.61176	0.0651869
		1.66471	0.0679999
		1.71765	0.0708825
		1.77059	0.0738335
		1.82353	0.0768518
		1.87647	0.0799356
		1.92941	0.0830834
		1.98235	0.0862931
		2.03529	0.0895625
		2.08824	0.0928892
		2.14118	0.0962704
		2.19412	0.0997031
		2.24706	0.103184
		2.3	0.10671
		2.35294	0.110277
		2.40588	0.113881
		2.45882	0.117518
		2.51176	0.121182
		2.56471	0.12487
		2.61765	0.128576
		2.67059	0.132294
		2.72353	0.136019
		2.77647	0.139744
		2.82941	0.143465
		2.88235	0.147173
		2.93529	0.150863
		2.98824	0.154528
		3.04118	0.15816
		3.09412	0.161752
		3.14706	0.165297
		3.2	0.168787
		3.25294	0.172214
		3.30588	0.175572
		3.35882	0.178851
		3.41176	0.182045
		3.46471	0.185145
		3.51765	0.188144
		3.57059	0.191034
		3.62353	0.193806
		3.67647	0.196455
		3.72941	0.198972
		3.78235	0.20135
		3.83529	0.203583
		3.88824	0.205664
		3.94118	0.207586
		3.99412	0.209344
		4.04706	0.210931
		4.1	0.212344
		4.15294	0.213577
		4.20588	0.214625
		4.25882	0.215486
		4.31176	0.216155
		4.36471	0.21663
		4.41765	0.216908
		4.47059	0.216989
		4.52353	0.21687
		4.57647	0.216552
		4.62941	0.216034
		4.68235	0.215317
		4.73529	0.214403
		4.78824	0.213293
		4.84118	0.211989
		4.89412	0.210496
		4.94706	0.208816
		5	0.206954
		5.05294	0.204914
		5.10588	0.202702
		5.15882	0.200323
		5.21176	0.197784
		5.26471	0.195092
		5.31765	0.192253
		5.37059	0.189275
		5.42353	0.186167
		5.47647	0.182935
		5.52941	0.179589
		5.58235	0.176137
		5.63529	0.172589
		5.68824	0.168953
		5.74118	0.165238
		5.79412	0.161454
		5.84706	0.15761
		5.9	0.153715
		5.95294	0.149779
		6.00588	0.145811
		6.05882	0.14182
		6.11176	0.137814
		6.16471	0.133804
		6.21765	0.129796
		6.27059	0.1258
		6.32353	0.121824
		6.37647	0.117875
		6.42941	0.113961
		6.48235	0.110089
		6.53529	0.106265
		6.58824	0.102496
		6.64118	0.0987881
		6.69412	0.095146
		6.74706	0.0915752
		6.8	0.0880803
		6.85294	0.0846654
		6.90588	0.0813343
		6.95882	0.0780903
		7.01176	0.0749363
		7.06471	0.0718747
		7.11765	0.0689076
		7.17059	0.0660363
		7.22353	0.0632623
		7.27647	0.0605861
		7.32941	0.0580083
		7.38235	0.0555288
		7.43529	0.0531472
		7.48824	0.050863
		7.54118	0.0486751
		7.59412	0.0465823
		7.64706	0.0445829
		7.7	0.0426753
		7.75294	0.0408573
		7.80588	0.0391267
		7.85882	0.0374811
		7.91176	0.0359178
		7.96471	0.0344341
		8.01765	0.0330272
		8.07059	0.031694
		8.12353	0.0304316
		8.17647	0.0292367
		8.22941	0.0281063
		8.28235	0.0270371
		8.33529	0.0260261
		8.38824	0.0250699
		8.44118	0.0241655
		8.49412	0.0233098
		8.54706	0.0224997
		8.6	0.0217322
		8.65294	0.0210045
		8.70588	0.0203137
		8.75882	0.0196572
		8.81176	0.0190323
		8.86471	0.0184365
		8.91765	0.0178676
		8.97059	0.0173231
		9.02353	0.0168011
		9.07647	0.0162995
		9.12941	0.0158165
		9.18235	0.0153504
		9.23529	0.0148995
		9.28824	0.0144624
		9.34118	0.0140377
		9.39412	0.0136243
		9.44706	0.0132211
		9.5	0.0128271
		9.55294	0.0124414
		9.60588	0.0120632
		9.65882	0.011692
		9.71176	0.0113272
		9.76471	0.0109683
		9.81765	0.010615
		9.87059	0.0102669
		9.92353	0.00992388
		9.97647	0.00958577
		10.0294	0.00925246
		10.0824	0.0089239
		10.1353	0.00860011
		10.1882	0.00828114
		10.2412	0.00796706
		10.2941	0.00765801
		10.3471	0.00735409
		10.4	0.00705551
		10.4529	0.00676241
		10.5059	0.00647496
		10.5588	0.00619338
		10.6118	0.00591783
		10.6647	0.0056485
		10.7176	0.00538558
		10.7706	0.00512925
		10.8235	0.00487966
		10.8765	0.00463695
		10.9294	0.00440128
		10.9824	0.00417276
		11.0353	0.00395147
		11.0882	0.00373747
		11.1412	0.00353087
		11.1941	0.00333165
		11.2471	0.00313984
		11.3	0.00295548
		11.3529	0.00277854
		11.4059	0.00260896
		11.4588	0.00244669
		11.5118	0.00229164
		11.5647	0.0021437
		11.6176	0.00200281
		11.6706	0.00186878
		11.7235	0.00174151
		11.7765	0.00162083
		11.8294	0.00150655
		11.8824	0.00139856
		11.9353	0.00129662
		11.9882	0.00120056
		12.0412	0.00111017
		12.0941	0.00102525
		12.1471	0.000945566
		12.2	0.000870964
		12.2529	0.000801193
		12.3059	0.00073601
		12.3588	0.000675254
		12.4118	0.000618695
		12.4647	0.000566134
		12.5176	0.000517335
		12.5706	0.000472116
		12.6235	0.000430288
		12.6765	0.000391641
		12.7294	0.000355976
		12.7824	0.000323138
		12.8353	0.000292922
		12.8882	0.000265147
		12.9412	0.000239723
		12.9941	0.000216445
		13.0471	0.000195164
		13.1	0.000175737
		13.1529	0.000158001
		13.2059	0.000141891
		13.2588	0.00012725
		13.3118	0.000113965
		13.3647	0.000101929
		13.4176	9.10393e-05
		13.4706	8.12026e-05
		13.5235	7.233e-05
		13.5765	6.4339e-05
		13.6294	5.71527e-05
		13.6824	5.06997e-05
		13.7353	4.49138e-05
		13.7882	3.97338e-05
		13.8412	3.5103e-05
		13.8941	3.09695e-05
		13.9471	2.72852e-05
		IsoLine	IsoLine

## Sheet: PlotDat4
Source sheet	Sheet3	-3	0.000138126	1.5	0	-3	0
Plot name	ProbDens3	-2.96471	0.000151112	1.8	0	8.96471	0
Plot Type	16	-2.92941	0.00016522	1.8	1
1st free col	9	-2.89412	0.00018054	1.5	1
Sigma Level	1	-2.85882	0.000197164	1.5	0
Absolute Errs	TRUE	-2.82353	0.000215193	ErrBox	ErrBox
Symbol Type	1	-2.78824	0.000234732	1.8	0
Inverse Plot	FALSE	-2.75294	0.000255951	2.1	0
Color Plot	TRUE	-2.71765	0.000278866	2.1	2
3D plot	FALSE	-2.68235	0.000303655	1.8	2
Linear	FALSE	-2.64706	0.000330455	1.8	0
Data Range	C5:D24	-2.61176	0.00035941	ErrBox	ErrBox
Filled Symbols	TRUE	-2.57647	0.000390675	2.1	0
ConcAge	FALSE	-2.54118	0.000424411	2.4	0
ConcSwap	FALSE	-2.50588	0.000460794	2.4	1
1st Symbol-row	1	-2.47059	0.000500004	2.1	1
		-2.43529	0.000542236	2.1	0
		-2.4	0.000587695	ErrBox	ErrBox
		-2.36471	0.000636596	2.4	0
		-2.32941	0.000689168	2.7	0
		-2.29412	0.000745651	2.7	1
		-2.25882	0.000806298	2.4	1
		-2.22353	0.000871375	2.4	0
		-2.18824	0.000941164	ErrBox	ErrBox
		-2.15294	0.00101596	2.7	0
		-2.11765	0.00109607	3	0
		-2.08235	0.00118182	3	4
		-2.04706	0.00127355	2.7	4
		-2.01176	0.00137162	2.7	0
		-1.97647	0.00147639	ErrBox	ErrBox
		-1.94118	0.00158827	3.3	0
		-1.90588	0.00170765	3.6	0
		-1.87059	0.00183496	3.6	3
		-1.83529	0.00197065	3.3	3
		-1.8	0.00211517	3.3	0
		-1.76471	0.00226901	ErrBox	ErrBox
		-1.72941	0.00243267	3.6	0
		-1.69412	0.00260666	3.9	0
		-1.65882	0.00279153	3.9	6
		-1.62353	0.00298782	3.6	6
		-1.58824	0.00319613	3.6	0
		-1.55294	0.00341705	ErrBox	ErrBox
		-1.51765	0.0036512	4.2	0
		-1.48235	0.00389923	4.5	0
		-1.44706	0.00416178	4.5	1
		-1.41176	0.00443954	4.2	1
		-1.37647	0.00473321	4.2	0
		-1.34118	0.00504351	ErrBox	ErrBox
		-1.30588	0.00537119
		-1.27059	0.00571701
		-1.23529	0.00608173
		-1.2	0.00646617
		-1.16471	0.00687114
		-1.12941	0.00729748
		-1.09412	0.00774603
		-1.05882	0.00821767
		-1.02353	0.00871328
		-0.988235	0.00923376
		-0.952941	0.00978003
		-0.917647	0.010353
		-0.882353	0.0109536
		-0.847059	0.0115829
		-0.811765	0.0122417
		-0.776471	0.012931
		-0.741176	0.0136518
		-0.705882	0.0144051
		-0.670588	0.0151918
		-0.635294	0.016013
		-0.6	0.0168696
		-0.564706	0.0177626
		-0.529412	0.018693
		-0.494118	0.0196618
		-0.458824	0.0206699
		-0.423529	0.0217182
		-0.388235	0.0228077
		-0.352941	0.0239394
		-0.317647	0.0251141
		-0.282353	0.0263327
		-0.247059	0.0275962
		-0.211765	0.0289052
		-0.176471	0.0302606
		-0.141176	0.0316633
		-0.105882	0.0331139
		-0.0705882	0.0346132
		-0.0352941	0.0361618
		-4.16334e-17	0.0377604
		0.0352941	0.0394095
		0.0705882	0.0411097
		0.105882	0.0428614
		0.141176	0.0446651
		0.176471	0.0465211
		0.211765	0.0484298
		0.247059	0.0503914
		0.282353	0.0524061
		0.317647	0.054474
		0.352941	0.0565952
		0.388235	0.0587696
		0.423529	0.0609971
		0.458824	0.0632775
		0.494118	0.0656105
		0.529412	0.0679959
		0.564706	0.0704332
		0.6	0.0729218
		0.635294	0.0754612
		0.670588	0.0780506
		0.705882	0.0806892
		0.741176	0.0833762
		0.776471	0.0861106
		0.811765	0.0888912
		0.847059	0.0917169
		0.882353	0.0945865
		0.917647	0.0974984
		0.952941	0.100451
		0.988235	0.103444
		1.02353	0.106473
		1.05882	0.109539
		1.09412	0.112639
		1.12941	0.115771
		1.16471	0.118933
		1.2	0.122122
		1.23529	0.125337
		1.27059	0.128575
		1.30588	0.131834
		1.34118	0.13511
		1.37647	0.138402
		1.41176	0.141707
		1.44706	0.145022
		1.48235	0.148343
		1.51765	0.151669
		1.55294	0.154995
		1.58824	0.15832
		1.62353	0.161639
		1.65882	0.164949
		1.69412	0.168248
		1.72941	0.171531
		1.76471	0.174795
		1.8	0.178038
		1.83529	0.181254
		1.87059	0.184442
		1.90588	0.187597
		1.94118	0.190716
		1.97647	0.193795
		2.01176	0.19683
		2.04706	0.199819
		2.08235	0.202757
		2.11765	0.205641
		2.15294	0.208468
		2.18824	0.211233
		2.22353	0.213934
		2.25882	0.216566
		2.29412	0.219127
		2.32941	0.221613
		2.36471	0.224021
		2.4	0.226348
		2.43529	0.22859
		2.47059	0.230745
		2.50588	0.232809
		2.54118	0.234779
		2.57647	0.236653
		2.61176	0.238428
		2.64706	0.240102
		2.68235	0.241671
		2.71765	0.243135
		2.75294	0.24449
		2.78824	0.245734
		2.82353	0.246865
		2.85882	0.247883
		2.89412	0.248784
		2.92941	0.249568
		2.96471	0.250234
		3	0.250779
		3.03529	0.251204
		3.07059	0.251506
		3.10588	0.251687
		3.14118	0.251745
		3.17647	0.251679
		3.21176	0.251491
		3.24706	0.251179
		3.28235	0.250744
		3.31765	0.250187
		3.35294	0.249507
		3.38824	0.248707
		3.42353	0.247786
		3.45882	0.246746
		3.49412	0.245589
		3.52941	0.244315
		3.56471	0.242926
		3.6	0.241424
		3.63529	0.239811
		3.67059	0.238089
		3.70588	0.236261
		3.74118	0.234328
		3.77647	0.232293
		3.81176	0.23016
		3.84706	0.22793
		3.88235	0.225608
		3.91765	0.223195
		3.95294	0.220694
		3.98824	0.218111
		4.02353	0.215447
		4.05882	0.212705
		4.09412	0.209891
		4.12941	0.207007
		4.16471	0.204057
		4.2	0.201045
		4.23529	0.197974
		4.27059	0.194849
		4.30588	0.191672
		4.34118	0.18845
		4.37647	0.185184
		4.41176	0.181879
		4.44706	0.17854
		4.48235	0.175169
		4.51765	0.171771
		4.55294	0.16835
		4.58824	0.164909
		4.62353	0.161454
		4.65882	0.157986
		4.69412	0.15451
		4.72941	0.15103
		4.76471	0.14755
		4.8	0.144072
		4.83529	0.140601
		4.87059	0.137139
		4.90588	0.133691
		4.94118	0.130259
		4.97647	0.126846
		5.01176	0.123456
		5.04706	0.120091
		5.08235	0.116754
		5.11765	0.113448
		5.15294	0.110175
		5.18824	0.106938
		5.22353	0.10374
		5.25882	0.100582
		5.29412	0.0974664
		5.32941	0.0943954
		5.36471	0.0913707
		5.4	0.0883941
		5.43529	0.0854671
		5.47059	0.0825913
		5.50588	0.0797679
		5.54118	0.0769983
		5.57647	0.0742835
		5.61176	0.0716244
		5.64706	0.069022
		5.68235	0.0664769
		5.71765	0.0639899
		5.75294	0.0615614
		5.78824	0.0591918
		5.82353	0.0568814
		5.85882	0.0546304
		5.89412	0.052439
		5.92941	0.050307
		5.96471	0.0482345
		6	0.0462212
		6.03529	0.0442668
		6.07059	0.0423711
		6.10588	0.0405335
		6.14118	0.0387535
		6.17647	0.0370307
		6.21176	0.0353642
		6.24706	0.0337535
		6.28235	0.0321978
		6.31765	0.0306962
		6.35294	0.0292479
		6.38824	0.027852
		6.42353	0.0265075
		6.45882	0.0252134
		6.49412	0.0239687
		6.52941	0.0227723
		6.56471	0.0216232
		6.6	0.0205203
		6.63529	0.0194624
		6.67059	0.0184484
		6.70588	0.017477
		6.74118	0.0165473
		6.77647	0.015658
		6.81176	0.0148078
		6.84706	0.0139957
		6.88235	0.0132205
		6.91765	0.0124809
		6.95294	0.0117759
		6.98824	0.0111042
		7.02353	0.0104648
		7.05882	0.00985641
		7.09412	0.00927799
		7.12941	0.00872842
		7.16471	0.00820661
		7.2	0.00771148
		7.23529	0.00724199
		7.27059	0.0067971
		7.30588	0.0063758
		7.34118	0.00597712
		7.37647	0.00560007
		7.41176	0.00524374
		7.44706	0.00490719
		7.48235	0.00458955
		7.51765	0.00428994
		7.55294	0.00400753
		7.58824	0.00374151
		7.62353	0.0034911
		7.65882	0.00325552
		7.69412	0.00303405
		7.72941	0.00282598
		7.76471	0.00263062
		7.8	0.00244732
		7.83529	0.00227545
		7.87059	0.0021144
		7.90588	0.00196358
		7.94118	0.00182245
		7.97647	0.00169045
		8.01176	0.00156709
		8.04706	0.00145187
		8.08235	0.00134432
		8.11765	0.001244
		8.15294	0.00115049
		8.18824	0.00106337
		8.22353	0.000982266
		8.25882	0.000906808
		8.29412	0.000836649
		8.32941	0.000771459
		8.36471	0.000710926
		8.4	0.000654752
		8.43529	0.000602658
		8.47059	0.000554378
		8.50588	0.000509662
		8.54118	0.000468273
		8.57647	0.000429989
		8.61176	0.0003946
		8.64706	0.000361907
		8.68235	0.000331724
		8.71765	0.000303877
		8.75294	0.000278154
		8.78824	0.000254501
		8.82353	0.000232721
		8.85882	0.000212677
		8.89412	0.000194243
		8.92941	0.000177301
		8.96471	0.000161739
		IsoLine	IsoLine

## Sheet: PlotDat5
Source sheet	Sheet3	-1	0.000122885	3.5	0	-1	0
Plot name	ProbDens4	-0.964706	0.000134959	3.8	0	10.9647	0
Plot Type	16	-0.929412	0.000148131	3.8	1
1st free col	9	-0.894118	0.000162518	3.5	1
Sigma Level	1	-0.858824	0.000178195	3.5	0
Absolute Errs	TRUE	-0.823529	0.00019524	ErrBox	ErrBox
Symbol Type	1	-0.788235	0.000213789	3.8	0
Inverse Plot	FALSE	-0.752941	0.00023396	4.1	0
Color Plot	TRUE	-0.717647	0.000255883	4.1	2
3D plot	FALSE	-0.682353	0.000279694	3.8	2
Linear	FALSE	-0.647059	0.000305539	3.8	0
Data Range	C25:D67	-0.611765	0.000333574	ErrBox	ErrBox
Filled Symbols	TRUE	-0.576471	0.000363966	4.1	0
ConcAge	FALSE	-0.541176	0.000396892	4.4	0
ConcSwap	FALSE	-0.505882	0.00043254	4.4	7
1st Symbol-row	1	-0.470588	0.00047111	4.1	7
		-0.435294	0.000512817	4.1	0
		-0.4	0.000557885	ErrBox	ErrBox
		-0.364706	0.000606556	4.4	0
		-0.329412	0.000659082	4.7	0
		-0.294118	0.000715735	4.7	7
		-0.258824	0.000776798	4.4	7
		-0.223529	0.000842574	4.4	0
		-0.188235	0.00091338	ErrBox	ErrBox
		-0.152941	0.000989552	4.7	0
		-0.117647	0.00107145	5	0
		-0.0823529	0.00115943	5	8
		-0.0470588	0.00125391	4.7	8
		-0.0117647	0.00135528	4.7	0
		0.0235294	0.00146399	ErrBox	ErrBox
		0.0588235	0.00158049	5	0
		0.0941176	0.00170526	5.3	0
		0.129412	0.00183879	5.3	5
		0.164706	0.00198162	5	5
		0.2	0.00213429	5	0
		0.235294	0.00229738	ErrBox	ErrBox
		0.270588	0.00247148	5.3	0
		0.305882	0.00265721	5.6	0
		0.341176	0.00285523	5.6	4
		0.376471	0.00306621	5.3	4
		0.411765	0.00329086	5.3	0
		0.447059	0.0035299	ErrBox	ErrBox
		0.482353	0.00378409	5.6	0
		0.517647	0.00405422	5.9	0
		0.552941	0.0043411	5.9	5
		0.588235	0.00464557	5.6	5
		0.623529	0.0049685	5.6	0
		0.658824	0.00531078	ErrBox	ErrBox
		0.694118	0.00567334	5.9	0
		0.729412	0.00605712	6.2	0
		0.764706	0.0064631	6.2	2
		0.8	0.00689229	5.9	2
		0.835294	0.00734571	5.9	0
		0.870588	0.00782442	ErrBox	ErrBox
		0.905882	0.00832949
		0.941176	0.00886202
		0.976471	0.00942314
		1.01176	0.010014
		1.04706	0.0106357
		1.08235	0.0112895
		1.11765	0.0119766
		1.15294	0.0126982
		1.18824	0.0134554
		1.22353	0.0142497
		1.25882	0.015082
		1.29412	0.0159539
		1.32941	0.0168664
		1.36471	0.0178208
		1.4	0.0188185
		1.43529	0.0198606
		1.47059	0.0209483
		1.50588	0.022083
		1.54118	0.0232658
		1.57647	0.0244979
		1.61176	0.0257805
		1.64706	0.0271148
		1.68235	0.0285018
		1.71765	0.0299427
		1.75294	0.0314385
		1.78824	0.0329902
		1.82353	0.0345987
		1.85882	0.0362651
		1.89412	0.0379901
		1.92941	0.0397745
		1.96471	0.0416191
		2	0.0435245
		2.03529	0.0454914
		2.07059	0.0475203
		2.10588	0.0496115
		2.14118	0.0517656
		2.17647	0.0539826
		2.21176	0.0562628
		2.24706	0.0586062
		2.28235	0.0610128
		2.31765	0.0634826
		2.35294	0.0660151
		2.38824	0.0686101
		2.42353	0.0712671
		2.45882	0.0739854
		2.49412	0.0767644
		2.52941	0.0796031
		2.56471	0.0825006
		2.6	0.0854558
		2.63529	0.0884675
		2.67059	0.0915341
		2.70588	0.0946543
		2.74118	0.0978263
		2.77647	0.101048
		2.81176	0.104319
		2.84706	0.107635
		2.88235	0.110995
		2.91765	0.114396
		2.95294	0.117836
		2.98824	0.121313
		3.02353	0.124823
		3.05882	0.128364
		3.09412	0.131932
		3.12941	0.135525
		3.16471	0.139139
		3.2	0.142771
		3.23529	0.146417
		3.27059	0.150074
		3.30588	0.153738
		3.34118	0.157405
		3.37647	0.161071
		3.41176	0.164733
		3.44706	0.168385
		3.48235	0.172025
		3.51765	0.175647
		3.55294	0.179248
		3.58824	0.182824
		3.62353	0.186369
		3.65882	0.18988
		3.69412	0.193352
		3.72941	0.19678
		3.76471	0.200161
		3.8	0.20349
		3.83529	0.206763
		3.87059	0.209975
		3.90588	0.213121
		3.94118	0.216198
		3.97647	0.219202
		4.01176	0.222128
		4.04706	0.224971
		4.08235	0.227729
		4.11765	0.230397
		4.15294	0.232971
		4.18824	0.235448
		4.22353	0.237824
		4.25882	0.240096
		4.29412	0.24226
		4.32941	0.244313
		4.36471	0.246252
		4.4	0.248075
		4.43529	0.249778
		4.47059	0.251359
		4.50588	0.252815
		4.54118	0.254145
		4.57647	0.255347
		4.61176	0.256419
		4.64706	0.257358
		4.68235	0.258165
		4.71765	0.258837
		4.75294	0.259374
		4.78824	0.259775
		4.82353	0.260039
		4.85882	0.260167
		4.89412	0.260158
		4.92941	0.260011
		4.96471	0.259729
		5	0.25931
		5.03529	0.258756
		5.07059	0.258068
		5.10588	0.257247
		5.14118	0.256294
		5.17647	0.25521
		5.21176	0.253999
		5.24706	0.252661
		5.28235	0.251198
		5.31765	0.249614
		5.35294	0.24791
		5.38824	0.246089
		5.42353	0.244155
		5.45882	0.242109
		5.49412	0.239955
		5.52941	0.237696
		5.56471	0.235336
		5.6	0.232878
		5.63529	0.230326
		5.67059	0.227684
		5.70588	0.224954
		5.74118	0.222142
		5.77647	0.219251
		5.81176	0.216285
		5.84706	0.213249
		5.88235	0.210146
		5.91765	0.20698
		5.95294	0.203757
		5.98824	0.200479
		6.02353	0.197152
		6.05882	0.193779
		6.09412	0.190365
		6.12941	0.186914
		6.16471	0.18343
		6.2	0.179918
		6.23529	0.176382
		6.27059	0.172825
		6.30588	0.169252
		6.34118	0.165667
		6.37647	0.162074
		6.41176	0.158476
		6.44706	0.154877
		6.48235	0.151282
		6.51765	0.147693
		6.55294	0.144115
		6.58824	0.14055
		6.62353	0.137001
		6.65882	0.133473
		6.69412	0.129968
		6.72941	0.126489
		6.76471	0.123039
		6.8	0.119621
		6.83529	0.116237
		6.87059	0.11289
		6.90588	0.109582
		6.94118	0.106316
		6.97647	0.103093
		7.01176	0.0999148
		7.04706	0.0967843
		7.08235	0.0937029
		7.11765	0.090672
		7.15294	0.0876931
		7.18824	0.0847676
		7.22353	0.0818967
		7.25882	0.0790814
		7.29412	0.0763228
		7.32941	0.0736216
		7.36471	0.0709786
		7.4	0.0683944
		7.43529	0.0658696
		7.47059	0.0634044
		7.50588	0.0609993
		7.54118	0.0586543
		7.57647	0.0563697
		7.61176	0.0541453
		7.64706	0.0519811
		7.68235	0.049877
		7.71765	0.0478325
		7.75294	0.0458475
		7.78824	0.0439215
		7.82353	0.0420539
		7.85882	0.0402443
		7.89412	0.038492
		7.92941	0.0367963
		7.96471	0.0351565
		8	0.0335718
		8.03529	0.0320413
		8.07059	0.0305641
		8.10588	0.0291394
		8.14118	0.0277662
		8.17647	0.0264434
		8.21176	0.0251701
		8.24706	0.0239452
		8.28235	0.0227675
		8.31765	0.0216361
		8.35294	0.0205498
		8.38824	0.0195074
		8.42353	0.0185078
		8.45882	0.01755
		8.49412	0.0166326
		8.52941	0.0157546
		8.56471	0.0149148
		8.6	0.0141121
		8.63529	0.0133453
		8.67059	0.0126132
		8.70588	0.0119148
		8.74118	0.0112489
		8.77647	0.0106143
		8.81176	0.0100101
		8.84706	0.00943501
		8.88235	0.00888809
		8.91765	0.00836826
		8.95294	0.00787448
		8.98824	0.00740574
		9.02353	0.00696104
		9.05882	0.00653942
		9.09412	0.00613993
		9.12941	0.00576164
		9.16471	0.00540365
		9.2	0.00506508
		9.23529	0.00474508
		9.27059	0.00444281
		9.30588	0.00415748
		9.34118	0.00388829
		9.37647	0.0036345
		9.41176	0.00339536
		9.44706	0.00317018
		9.48235	0.00295827
		9.51765	0.00275898
		9.55294	0.00257165
		9.58824	0.0023957
		9.62353	0.00223053
		9.65882	0.00207557
		9.69412	0.00193028
		9.72941	0.00179414
		9.76471	0.00166667
		9.8	0.00154737
		9.83529	0.00143579
		9.87059	0.0013315
		9.90588	0.00123408
		9.94118	0.00114314
		9.97647	0.0010583
		10.0118	0.000979192
		10.0471	0.000905481
		10.0824	0.000836839
		10.1176	0.000772957
		10.1529	0.000713543
		10.1882	0.000658317
		10.2235	0.000607017
		10.2588	0.000559392
		10.2941	0.000515207
		10.3294	0.000474239
		10.3647	0.000436276
		10.4	0.000401121
		10.4353	0.000368585
		10.4706	0.000338493
		10.5059	0.000310677
		10.5412	0.000284981
		10.5765	0.00026126
		10.6118	0.000239373
		10.6471	0.000219193
		10.6824	0.000200597
		10.7176	0.000183472
		10.7529	0.000167712
		10.7882	0.000153215
		10.8235	0.000139867
		10.8588	0.000127629
		10.8941	0.000116393
		10.9294	0.000106063
		10.9647	9.66137e-05
		IsoLine	IsoLine

## Sheet: PlotDat6
Source sheet	Sheet3	3	0.00020407	7.675	0	3	0
Plot name	ProbDens5	3.03235	0.00022173	7.95	0	13.9676	0
Plot Type	16	3.06471	0.000240795	7.95	1
1st free col	9	3.09706	0.000261366	7.675	1
Sigma Level	1	3.12941	0.00028355	7.675	0
Absolute Errs	TRUE	3.16176	0.00030746	ErrBox	ErrBox
Symbol Type	1	3.19412	0.000333216	8.775	0
Inverse Plot	FALSE	3.22647	0.000360946	9.05	0
Color Plot	TRUE	3.25882	0.000390785	9.05	1
3D plot	FALSE	3.29118	0.000422875	8.775	1
Linear	FALSE	3.32353	0.000457369	8.775	0
Data Range	C2:D4	3.35588	0.000494425	ErrBox	ErrBox
Filled Symbols	TRUE	3.38824	0.000534212	9.325	0
ConcAge	FALSE	3.42059	0.000576908	9.6	0
ConcSwap	FALSE	3.45294	0.000622701	9.6	1
1st Symbol-row	1	3.48529	0.00067179	9.325	1
		3.51765	0.000724381	9.325	0
		3.55	0.000780695	ErrBox	ErrBox
		3.58235	0.000840961
		3.61471	0.000905424
		3.64706	0.000974336
		3.67941	0.00104796
		3.71176	0.00112659
		3.74412	0.00121051
		3.77647	0.00130002
		3.80882	0.00139545
		3.84118	0.00149714
		3.87353	0.00160543
		3.90588	0.00172069
		3.93824	0.0018433
		3.97059	0.00197366
		4.00294	0.00211219
		4.03529	0.00225932
		4.06765	0.00241548
		4.1	0.00258116
		4.13235	0.00275683
		4.16471	0.00294298
		4.19706	0.00314015
		4.22941	0.00334887
		4.26176	0.00356969
		4.29412	0.00380319
		4.32647	0.00404995
		4.35882	0.0043106
		4.39118	0.00458575
		4.42353	0.00487607
		4.45588	0.00518221
		4.48824	0.00550486
		4.52059	0.00584472
		4.55294	0.00620252
		4.58529	0.006579
		4.61765	0.0069749
		4.65	0.00739102
		4.68235	0.00782812
		4.71471	0.00828703
		4.74706	0.00876856
		4.77941	0.00927355
		4.81176	0.00980286
		4.84412	0.0103573
		4.87647	0.0109379
		4.90882	0.0115453
		4.94118	0.0121806
		4.97353	0.0128446
		5.00588	0.0135383
		5.03824	0.0142626
		5.07059	0.0150183
		5.10294	0.0158065
		5.13529	0.016628
		5.16765	0.0174839
		5.2	0.0183749
		5.23235	0.0193022
		5.26471	0.0202665
		5.29706	0.0212688
		5.32941	0.02231
		5.36176	0.023391
		5.39412	0.0245127
		5.42647	0.025676
		5.45882	0.0268817
		5.49118	0.0281307
		5.52353	0.0294238
		5.55588	0.0307617
		5.58824	0.0321453
		5.62059	0.0335752
		5.65294	0.0350522
		5.68529	0.0365769
		5.71765	0.03815
		5.75	0.0397721
		5.78235	0.0414436
		5.81471	0.0431652
		5.84706	0.0449372
		5.87941	0.0467602
		5.91176	0.0486343
		5.94412	0.05056
		5.97647	0.0525375
		6.00882	0.0545669
		6.04118	0.0566484
		6.07353	0.0587819
		6.10588	0.0609676
		6.13824	0.0632053
		6.17059	0.0654948
		6.20294	0.0678359
		6.23529	0.0702283
		6.26765	0.0726716
		6.3	0.0751653
		6.33235	0.0777088
		6.36471	0.0803015
		6.39706	0.0829427
		6.42941	0.0856316
		6.46176	0.0883671
		6.49412	0.0911484
		6.52647	0.0939744
		6.55882	0.0968438
		6.59118	0.0997553
		6.62353	0.102708
		6.65588	0.105699
		6.68824	0.108729
		6.72059	0.111794
		6.75294	0.114894
		6.78529	0.118027
		6.81765	0.12119
		6.85	0.124382
		6.88235	0.1276
		6.91471	0.130842
		6.94706	0.134106
		6.97941	0.13739
		7.01176	0.140691
		7.04412	0.144007
		7.07647	0.147335
		7.10882	0.150672
		7.14118	0.154015
		7.17353	0.157363
		7.20588	0.160711
		7.23824	0.164057
		7.27059	0.167397
		7.30294	0.17073
		7.33529	0.174051
		7.36765	0.177358
		7.4	0.180647
		7.43235	0.183915
		7.46471	0.187159
		7.49706	0.190376
		7.52941	0.193561
		7.56176	0.196713
		7.59412	0.199827
		7.62647	0.2029
		7.65882	0.205929
		7.69118	0.20891
		7.72353	0.211841
		7.75588	0.214717
		7.78824	0.217536
		7.82059	0.220295
		7.85294	0.222989
		7.88529	0.225617
		7.91765	0.228174
		7.95	0.230658
		7.98235	0.233066
		8.01471	0.235395
		8.04706	0.237642
		8.07941	0.239804
		8.11176	0.241878
		8.14412	0.243863
		8.17647	0.245754
		8.20882	0.247551
		8.24118	0.249251
		8.27353	0.250851
		8.30588	0.252349
		8.33824	0.253744
		8.37059	0.255034
		8.40294	0.256216
		8.43529	0.25729
		8.46765	0.258253
		8.5	0.259106
		8.53235	0.259845
		8.56471	0.260471
		8.59706	0.260982
		8.62941	0.261378
		8.66176	0.261659
		8.69412	0.261822
		8.72647	0.26187
		8.75882	0.2618
		8.79118	0.261614
		8.82353	0.261312
		8.85588	0.260893
		8.88824	0.260359
		8.92059	0.25971
		8.95294	0.258946
		8.98529	0.258069
		9.01765	0.25708
		9.05	0.255979
		9.08235	0.25477
		9.11471	0.253452
		9.14706	0.252027
		9.17941	0.250498
		9.21176	0.248866
		9.24412	0.247133
		9.27647	0.245301
		9.30882	0.243374
		9.34118	0.241352
		9.37353	0.239239
		9.40588	0.237037
		9.43824	0.234749
		9.47059	0.232377
		9.50294	0.229925
		9.53529	0.227395
		9.56765	0.224791
		9.6	0.222116
		9.63235	0.219372
		9.66471	0.216564
		9.69706	0.213693
		9.72941	0.210765
		9.76176	0.207781
		9.79412	0.204745
		9.82647	0.201662
		9.85882	0.198533
		9.89118	0.195363
		9.92353	0.192155
		9.95588	0.188913
		9.98824	0.18564
		10.0206	0.182339
		10.0529	0.179014
		10.0853	0.175669
		10.1176	0.172306
		10.15	0.168928
		10.1824	0.16554
		10.2147	0.162145
		10.2471	0.158745
		10.2794	0.155344
		10.3118	0.151945
		10.3441	0.148551
		10.3765	0.145165
		10.4088	0.141789
		10.4412	0.138427
		10.4735	0.135082
		10.5059	0.131755
		10.5382	0.128449
		10.5706	0.125168
		10.6029	0.121913
		10.6353	0.118686
		10.6676	0.11549
		10.7	0.112327
		10.7324	0.109199
		10.7647	0.106107
		10.7971	0.103055
		10.8294	0.100042
		10.8618	0.0970712
		10.8941	0.0941437
		10.9265	0.091261
		10.9588	0.0884242
		10.9912	0.0856347
		11.0235	0.0828934
		11.0559	0.0802015
		11.0882	0.0775597
		11.1206	0.074969
		11.1529	0.0724299
		11.1853	0.0699432
		11.2176	0.0675092
		11.25	0.0651286
		11.2824	0.0628015
		11.3147	0.0605284
		11.3471	0.0583092
		11.3794	0.0561443
		11.4118	0.0540335
		11.4441	0.0519768
		11.4765	0.0499741
		11.5088	0.0480252
		11.5412	0.0461299
		11.5735	0.0442877
		11.6059	0.0424984
		11.6382	0.0407615
		11.6706	0.0390764
		11.7029	0.0374427
		11.7353	0.0358597
		11.7676	0.0343268
		11.8	0.0328433
		11.8324	0.0314085
		11.8647	0.0300217
		11.8971	0.0286819
		11.9294	0.0273884
		11.9618	0.0261404
		11.9941	0.024937
		12.0265	0.0237772
		12.0588	0.0226601
		12.0912	0.0215849
		12.1235	0.0205505
		12.1559	0.019556
		12.1882	0.0186003
		12.2206	0.0176827
		12.2529	0.0168019
		12.2853	0.0159571
		12.3176	0.0151472
		12.35	0.0143712
		12.3824	0.0136283
		12.4147	0.0129173
		12.4471	0.0122372
		12.4794	0.0115872
		12.5118	0.0109663
		12.5441	0.0103734
		12.5765	0.00980766
		12.6088	0.00926814
		12.6412	0.00875391
		12.6735	0.00826407
		12.7059	0.00779772
		12.7382	0.007354
		12.7706	0.00693204
		12.8029	0.00653101
		12.8353	0.00615008
		12.8676	0.00578845
		12.9	0.00544535
		12.9324	0.00512
		12.9647	0.00481166
		12.9971	0.00451961
		13.0294	0.00424314
		13.0618	0.00398157
		13.0941	0.00373423
		13.1265	0.00350049
		13.1588	0.00327972
		13.1912	0.00307132
		13.2235	0.0028747
		13.2559	0.0026893
		13.2882	0.00251458
		13.3206	0.00235002
		13.3529	0.00219512
		13.3853	0.00204938
		13.4176	0.00191235
		13.45	0.00178357
		13.4824	0.00166262
		13.5147	0.00154908
		13.5471	0.00144255
		13.5794	0.00134267
		13.6118	0.00124907
		13.6441	0.0011614
		13.6765	0.00107933
		13.7088	0.00100255
		13.7412	0.000930751
		13.7735	0.000863656
		13.8059	0.000800987
		13.8382	0.000742485
		13.8706	0.000687904
		13.9029	0.000637009
		13.9353	0.000589577
		13.9676	0.000545397
		IsoLine	IsoLine
