# Supplementary material for: Magmatic processes within the plumbing system of the ultraslow-spreading southwest Indian ridge: constraints from olivine, plagioclase and melt inclusions
Source: Springer Nature journal article supplement (doi:10.1007/s00410-024-02098-0), 2024-02-22
Supplement: MOESM9 [file 410_2024_2098_MOESM9_ESM.xls]

## Sheet: PlotDat1
Source sheet	Table S9	980	5.38033e-06	1068	0	980	0
Plot name	ProbDens1	980.647	6.09811e-06	1073.5	0	1199.35	0
Plot Type	16	981.294	6.72027e-06	1073.5	1
1st free col	9	981.941	7.40104e-06	1068	1
Sigma Level	1	982.588	8.14542e-06	1068	0
Absolute Errs	TRUE	983.235	8.95879e-06	ErrBox	ErrBox
Symbol Type	1	983.882	9.84691e-06	1079	0
Inverse Plot	FALSE	984.529	1.09882e-05	1084.5	0
Color Plot	TRUE	985.176	1.20657e-05	1084.5	2
3D plot	FALSE	985.824	1.32402e-05	1079	2
Linear	FALSE	986.471	1.45197e-05	1079	0
Data Range	AT5:AU10	987.118	1.59125e-05	ErrBox	ErrBox
Filled Symbols	TRUE	987.765	1.74276e-05	1090	0
ConcAge	FALSE	988.412	1.90747e-05	1095.5	0
ConcSwap	FALSE	989.059	2.08639e-05	1095.5	2
1st Symbol-row	1	989.706	2.28062e-05	1090	2
		990.353	2.49132e-05	1090	0
		991	2.71974e-05	ErrBox	ErrBox
		991.647	2.96718e-05	1101	0
		992.294	3.23505e-05	1106.5	0
		992.941	3.52484e-05	1106.5	1
		993.588	3.83811e-05	1101	1
		994.235	4.17655e-05	1101	0
		994.882	4.54191e-05	ErrBox	ErrBox
		995.529	4.95318e-05
		996.176	5.38015e-05
		996.824	5.8402e-05
		997.471	6.33555e-05
		998.118	6.86854e-05
		998.765	7.44164e-05
		999.412	8.05745e-05
		1000.06	8.71867e-05
		1000.71	9.42818e-05
		1001.35	0.00010189
		1002	0.000110042
		1002.65	0.000118771
		1003.29	0.000128112
		1003.94	0.000138101
		1004.59	0.000148774
		1005.24	0.000160172
		1005.88	0.000172334
		1006.53	0.000185303
		1007.18	0.000199124
		1007.82	0.000213841
		1008.47	0.000229502
		1009.12	0.000246156
		1009.76	0.000263853
		1010.41	0.000282647
		1011.06	0.00030259
		1011.71	0.000323738
		1012.35	0.00034615
		1013	0.000369883
		1013.65	0.000394997
		1014.29	0.000421556
		1014.94	0.000449622
		1015.59	0.000479259
		1016.24	0.000510535
		1016.88	0.000543515
		1017.53	0.00057827
		1018.18	0.000614868
		1018.82	0.000653381
		1019.47	0.000693879
		1020.12	0.000736435
		1020.76	0.000781122
		1021.41	0.000828014
		1022.06	0.000877183
		1022.71	0.000928706
		1023.35	0.000982654
		1024	0.0010391
		1024.65	0.00109813
		1025.29	0.0011598
		1025.94	0.00122419
		1026.59	0.00129137
		1027.24	0.00136141
		1027.88	0.00143439
		1028.53	0.00151036
		1029.18	0.0015894
		1029.82	0.00167156
		1030.47	0.00175692
		1031.12	0.00184552
		1031.76	0.00193743
		1032.41	0.00203269
		1033.06	0.00213137
		1033.71	0.00223349
		1034.35	0.00233911
		1035	0.00244827
		1035.65	0.00256099
		1036.29	0.00267731
		1036.94	0.00279724
		1037.59	0.00292082
		1038.24	0.00304804
		1038.88	0.00317892
		1039.53	0.00331347
		1040.18	0.00345166
		1040.82	0.0035935
		1041.47	0.00373897
		1042.12	0.00388803
		1042.76	0.00404066
		1043.41	0.00419682
		1044.06	0.00435646
		1044.71	0.00451952
		1045.35	0.00468595
		1046	0.00485567
		1046.65	0.00502859
		1047.29	0.00520465
		1047.94	0.00538373
		1048.59	0.00556575
		1049.24	0.00575057
		1049.88	0.00593809
		1050.53	0.00612818
		1051.18	0.00632069
		1051.82	0.00651549
		1052.47	0.00671241
		1053.12	0.00691131
		1053.76	0.00711201
		1054.41	0.00731432
		1055.06	0.00751808
		1055.71	0.00772308
		1056.35	0.00792913
		1057	0.00813603
		1057.65	0.00834355
		1058.29	0.00855148
		1058.94	0.00875961
		1059.59	0.00896769
		1060.24	0.00917549
		1060.88	0.00938278
		1061.53	0.00958931
		1062.18	0.00979483
		1062.82	0.00999909
		1063.47	0.0102018
		1064.12	0.0104028
		1064.76	0.0106018
		1065.41	0.0107985
		1066.06	0.0109926
		1066.71	0.011184
		1067.35	0.0113722
		1068	0.0115572
		1068.65	0.0117386
		1069.29	0.0119161
		1069.94	0.0120896
		1070.59	0.0122587
		1071.24	0.0124233
		1071.88	0.0125831
		1072.53	0.0127378
		1073.18	0.0128872
		1073.82	0.0130312
		1074.47	0.0131694
		1075.12	0.0133017
		1075.76	0.0134279
		1076.41	0.0135477
		1077.06	0.0136611
		1077.71	0.0137678
		1078.35	0.0138676
		1079	0.0139605
		1079.65	0.0140462
		1080.29	0.0141247
		1080.94	0.0141957
		1081.59	0.0142593
		1082.24	0.0143153
		1082.88	0.0143636
		1083.53	0.0144041
		1084.18	0.0144368
		1084.82	0.0144617
		1085.47	0.0144786
		1086.12	0.0144876
		1086.76	0.0144887
		1087.41	0.0144819
		1088.06	0.0144671
		1088.71	0.0144445
		1089.35	0.014414
		1090	0.0143757
		1090.65	0.0143297
		1091.29	0.014276
		1091.94	0.0142148
		1092.59	0.0141461
		1093.24	0.0140701
		1093.88	0.0139868
		1094.53	0.0138965
		1095.18	0.0137992
		1095.82	0.0136952
		1096.47	0.0135845
		1097.12	0.0134674
		1097.76	0.0133441
		1098.41	0.0132147
		1099.06	0.0130794
		1099.71	0.0129385
		1100.35	0.0127921
		1101	0.0126406
		1101.65	0.012484
		1102.29	0.0123226
		1102.94	0.0121568
		1103.59	0.0119866
		1104.24	0.0118125
		1104.88	0.0116345
		1105.53	0.0114529
		1106.18	0.0112681
		1106.82	0.0110803
		1107.47	0.0108896
		1108.12	0.0106964
		1108.76	0.0105009
		1109.41	0.0103034
		1110.06	0.0101041
		1110.71	0.0099033
		1111.35	0.00970117
		1112	0.009498
		1112.65	0.00929402
		1113.29	0.00908947
		1113.94	0.00888458
		1114.59	0.00867957
		1115.24	0.00847467
		1115.88	0.00827009
		1116.53	0.00806605
		1117.18	0.00786274
		1117.82	0.00766037
		1118.47	0.00745914
		1119.12	0.00725921
		1119.76	0.00706078
		1120.41	0.00686402
		1121.06	0.00666908
		1121.71	0.00647613
		1122.35	0.00628531
		1123	0.00609677
		1123.65	0.00591064
		1124.29	0.00572704
		1124.94	0.00554609
		1125.59	0.0053679
		1126.24	0.00519258
		1126.88	0.00502021
		1127.53	0.00485089
		1128.18	0.0046847
		1128.82	0.0045217
		1129.47	0.00436195
		1130.12	0.00420552
		1130.76	0.00405246
		1131.41	0.0039028
		1132.06	0.00375659
		1132.71	0.00361384
		1133.35	0.00347459
		1134	0.00333884
		1134.65	0.00320661
		1135.29	0.0030779
		1135.94	0.00295271
		1136.59	0.00283103
		1137.24	0.00271284
		1137.88	0.00259814
		1138.53	0.00248689
		1139.18	0.00237907
		1139.82	0.00227464
		1140.47	0.00217358
		1141.12	0.00207584
		1141.76	0.00198137
		1142.41	0.00189014
		1143.06	0.0018021
		1143.71	0.00171718
		1144.35	0.00163534
		1145	0.00155651
		1145.65	0.00148065
		1146.29	0.00140768
		1146.94	0.00133755
		1147.59	0.00127019
		1148.24	0.00120554
		1148.88	0.00114352
		1149.53	0.00108407
		1150.18	0.00102713
		1150.82	0.000972622
		1151.47	0.000920478
		1152.12	0.000870629
		1152.76	0.000823007
		1153.41	0.000777542
		1154.06	0.000734166
		1154.71	0.00069281
		1155.35	0.000653406
		1156	0.000615887
		1156.65	0.000580187
		1157.29	0.000546239
		1157.94	0.000513979
		1158.59	0.000483343
		1159.24	0.000454269
		1159.88	0.000426696
		1160.53	0.000400562
		1161.18	0.00037581
		1161.82	0.000352381
		1162.47	0.000330219
		1163.12	0.00030927
		1163.76	0.000289479
		1164.41	0.000270797
		1165.06	0.00025317
		1165.71	0.000236552
		1166.35	0.000220895
		1167	0.000206152
		1167.65	0.000192279
		1168.29	0.000179234
		1168.94	0.000166975
		1169.59	0.000155462
		1170.24	0.000144657
		1170.88	0.000134523
		1171.53	0.000125024
		1172.18	0.000116127
		1172.82	0.000107799
		1173.47	0.000100008
		1174.12	9.27251e-05
		1174.76	8.59208e-05
		1175.41	7.95682e-05
		1176.06	7.3641e-05
		1176.71	6.81144e-05
		1177.35	6.2808e-05
		1178	5.80298e-05
		1178.65	5.35826e-05
		1179.29	4.94463e-05
		1179.94	4.56015e-05
		1180.59	4.20302e-05
		1181.24	3.8715e-05
		1181.88	3.56396e-05
		1182.53	3.27885e-05
		1183.18	3.01471e-05
		1183.82	2.77015e-05
		1184.47	2.54388e-05
		1185.12	2.33466e-05
		1185.76	2.14134e-05
		1186.41	1.96282e-05
		1187.06	1.79808e-05
		1187.71	1.64616e-05
		1188.35	1.50615e-05
		1189	1.3622e-05
		1189.65	1.24515e-05
		1190.29	1.13745e-05
		1190.94	1.03842e-05
		1191.59	9.32047e-06
		1192.24	8.50178e-06
		1192.88	7.75009e-06
		1193.53	7.06039e-06
		1194.18	6.428e-06
		1194.82	5.84854e-06
		1195.47	5.31795e-06
		1196.12	4.83243e-06
		1196.76	4.38845e-06
		1197.41	3.98273e-06
		1198.06	3.61223e-06
		1198.71	3.27411e-06
		1199.35	2.96576e-06
		IsoLine	IsoLine

## Sheet: PlotDat2
Source sheet	Table S9	1000	1.68095e-07	1120	0	1000	0
Plot name	ProbDens2	1001.18	1.95597e-07	1130	0	1398.82	0
Plot Type	16	1002.35	2.27263e-07	1130	1
1st free col	9	1003.53	2.63665e-07	1120	1
Sigma Level	1	1004.71	3.05448e-07	1120	0
Absolute Errs	TRUE	1005.88	3.5333e-07	ErrBox	ErrBox
Symbol Type	1	1007.06	4.08116e-07	1130	0
Inverse Plot	FALSE	1008.24	4.70702e-07	1140	0
Color Plot	TRUE	1009.41	5.42085e-07	1140	2
3D plot	FALSE	1010.59	6.23373e-07	1130	2
Linear	FALSE	1011.76	7.15793e-07	1130	0
Data Range	AT11:AU40	1012.94	8.20704e-07	ErrBox	ErrBox
Filled Symbols	TRUE	1014.12	9.39603e-07	1140	0
ConcAge	FALSE	1015.29	1.07414e-06	1150	0
ConcSwap	FALSE	1016.47	1.22614e-06	1150	3
1st Symbol-row	1	1017.65	1.39757e-06	1140	3
		1018.82	1.59063e-06	1140	0
		1020	1.80769e-06	ErrBox	ErrBox
		1021.18	2.05134e-06	1150	0
		1022.35	2.3244e-06	1160	0
		1023.53	2.62992e-06	1160	3
		1024.71	2.97121e-06	1150	3
		1025.88	3.35184e-06	1150	0
		1027.06	3.77567e-06	ErrBox	ErrBox
		1028.24	4.28036e-06	1160	0
		1029.41	4.81138e-06	1170	0
		1030.59	5.40073e-06	1170	3
		1031.76	6.09267e-06	1160	3
		1032.94	6.82446e-06	1160	0
		1034.12	7.70855e-06	ErrBox	ErrBox
		1035.29	8.61908e-06	1180	0
		1036.47	9.62532e-06	1190	0
		1037.65	1.0736e-05	1190	3
		1038.82	1.19606e-05	1180	3
		1040	1.33091e-05	1180	0
		1041.18	1.48279e-05	ErrBox	ErrBox
		1042.35	1.64665e-05	1190	0
		1043.53	1.82662e-05	1200	0
		1044.71	2.0241e-05	1200	1
		1045.88	2.24781e-05	1190	1
		1047.06	2.4899e-05	1190	0
		1048.24	2.75206e-05	ErrBox	ErrBox
		1049.41	3.039e-05	1200	0
		1050.59	3.36021e-05	1210	0
		1051.76	3.70494e-05	1210	3
		1052.94	4.08169e-05	1200	3
		1054.12	4.49322e-05	1200	0
		1055.29	4.94248e-05	ErrBox	ErrBox
		1056.47	5.43659e-05	1210	0
		1057.65	5.97211e-05	1220	0
		1058.82	6.556e-05	1220	3
		1060	7.19235e-05	1210	3
		1061.18	7.88559e-05	1210	0
		1062.35	8.64051e-05	ErrBox	ErrBox
		1063.53	9.46225e-05	1220	0
		1064.71	0.000103564	1230	0
		1065.88	0.000113289	1230	3
		1067.06	0.000123861	1220	3
		1068.24	0.000135351	1220	0
		1069.41	0.000147831	ErrBox	ErrBox
		1070.59	0.00016138	1240	0
		1071.76	0.000176083	1250	0
		1072.94	0.000192028	1250	2
		1074.12	0.000209347	1240	2
		1075.29	0.000228075	1240	0
		1076.47	0.000248384	ErrBox	ErrBox
		1077.65	0.000270359	1250	0
		1078.82	0.000294079	1260	0
		1080	0.000319696	1260	2
		1081.18	0.000347339	1250	2
		1082.35	0.000377138	1250	0
		1083.53	0.00040923	ErrBox	ErrBox
		1084.71	0.000443789	1260	0
		1085.88	0.000480895	1270	0
		1087.06	0.00052072	1270	1
		1088.24	0.000563412	1260	1
		1089.41	0.000609191	1260	0
		1090.59	0.00065807	ErrBox	ErrBox
		1091.76	0.000710288
		1092.94	0.000765924
		1094.12	0.000825144
		1095.29	0.000888114
		1096.47	0.000954894
		1097.65	0.00102563
		1098.82	0.00110046
		1100	0.00117941
		1101.18	0.00126259
		1102.35	0.00135005
		1103.53	0.00144186
		1104.71	0.00153802
		1105.88	0.00163859
		1107.06	0.00174354
		1108.24	0.00185275
		1109.41	0.0019662
		1110.59	0.00208381
		1111.76	0.00220545
		1112.94	0.002331
		1114.12	0.0024603
		1115.29	0.0025931
		1116.47	0.0027292
		1117.65	0.00286834
		1118.82	0.00301026
		1120	0.00315464
		1121.18	0.00330116
		1122.35	0.00344946
		1123.53	0.00359919
		1124.71	0.00374994
		1125.88	0.0039014
		1127.06	0.00405301
		1128.24	0.00420441
		1129.41	0.00435517
		1130.59	0.00450485
		1131.76	0.00465306
		1132.94	0.0047993
		1134.12	0.00494318
		1135.29	0.00508428
		1136.47	0.00522222
		1137.65	0.00535661
		1138.82	0.00548714
		1140	0.00561339
		1141.18	0.0057351
		1142.35	0.00585199
		1143.53	0.00596383
		1144.71	0.00607039
		1145.88	0.00617151
		1147.06	0.00626705
		1148.24	0.00635691
		1149.41	0.00644104
		1150.59	0.00651945
		1151.76	0.00659209
		1152.94	0.00665905
		1154.12	0.00672042
		1155.29	0.00677632
		1156.47	0.00682692
		1157.65	0.00687239
		1158.82	0.00691296
		1160	0.00694886
		1161.18	0.00698035
		1162.35	0.00700772
		1163.53	0.00703125
		1164.71	0.00705124
		1165.88	0.00706801
		1167.06	0.00708187
		1168.24	0.00709314
		1169.41	0.00710211
		1170.59	0.0071091
		1171.76	0.0071144
		1172.94	0.00711827
		1174.12	0.007121
		1175.29	0.00712282
		1176.47	0.00712395
		1177.65	0.00712459
		1178.82	0.00712493
		1180	0.00712511
		1181.18	0.00712526
		1182.35	0.00712549
		1183.53	0.00712585
		1184.71	0.0071264
		1185.88	0.00712717
		1187.06	0.00712814
		1188.24	0.00712928
		1189.41	0.00713055
		1190.59	0.00713187
		1191.76	0.00713315
		1192.94	0.00713428
		1194.12	0.00713513
		1195.29	0.00713556
		1196.47	0.00713542
		1197.65	0.00713454
		1198.82	0.00713275
		1200	0.00712988
		1201.18	0.00712575
		1202.35	0.00712017
		1203.53	0.00711296
		1204.71	0.00710395
		1205.88	0.00709296
		1207.06	0.00707982
		1208.24	0.00706436
		1209.41	0.00704644
		1210.59	0.00702589
		1211.76	0.0070026
		1212.94	0.00697642
		1214.12	0.00694726
		1215.29	0.006915
		1216.47	0.00687957
		1217.65	0.00684088
		1218.82	0.00679887
		1220	0.0067535
		1221.18	0.00670474
		1222.35	0.00665255
		1223.53	0.00659693
		1224.71	0.00653788
		1225.88	0.00647542
		1227.06	0.00640959
		1228.24	0.00634041
		1229.41	0.00626794
		1230.59	0.00619225
		1231.76	0.0061134
		1232.94	0.00603147
		1234.12	0.00594657
		1235.29	0.00585878
		1236.47	0.00576821
		1237.65	0.00567498
		1238.82	0.00557918
		1240	0.00548099
		1241.18	0.00538053
		1242.35	0.00527793
		1243.53	0.00517333
		1244.71	0.00506687
		1245.88	0.00495869
		1247.06	0.004849
		1248.24	0.00473791
		1249.41	0.00462561
		1250.59	0.00451223
		1251.76	0.00439796
		1252.94	0.00428291
		1254.12	0.00416733
		1255.29	0.00405131
		1256.47	0.00393509
		1257.65	0.00381875
		1258.82	0.00370253
		1260	0.00358656
		1261.18	0.00347099
		1262.35	0.00335598
		1263.53	0.00324166
		1264.71	0.00312821
		1265.88	0.00301578
		1267.06	0.00290454
		1268.24	0.00279459
		1269.41	0.00268603
		1270.59	0.00257906
		1271.76	0.00247377
		1272.94	0.00237027
		1274.12	0.00226868
		1275.29	0.00216906
		1276.47	0.00207157
		1277.65	0.00197628
		1278.82	0.00188322
		1280	0.00179255
		1281.18	0.00170429
		1282.35	0.0016185
		1283.53	0.00153522
		1284.71	0.00145451
		1285.88	0.0013764
		1287.06	0.00130091
		1288.24	0.00122806
		1289.41	0.00115786
		1290.59	0.00109032
		1291.76	0.00102543
		1292.94	0.000963188
		1294.12	0.000903538
		1295.29	0.000846521
		1296.47	0.000792072
		1297.65	0.0007401
		1298.82	0.000690685
		1300	0.000643711
		1301.18	0.000599127
		1302.35	0.000556846
		1303.53	0.000516878
		1304.71	0.00047912
		1305.88	0.000443508
		1307.06	0.000409972
		1308.24	0.000378442
		1309.41	0.000348845
		1310.59	0.000321108
		1311.76	0.000295154
		1312.94	0.00027091
		1314.12	0.000248298
		1315.29	0.000227211
		1316.47	0.000207614
		1317.65	0.000189429
		1318.82	0.000172612
		1320	0.000157054
		1321.18	0.000142685
		1322.35	0.000129406
		1323.53	0.000117216
		1324.71	0.000106013
		1325.88	9.57347e-05
		1327.06	8.63206e-05
		1328.24	7.77126e-05
		1329.41	6.98551e-05
		1330.59	6.26947e-05
		1331.76	5.61525e-05
		1332.94	5.0242e-05
		1334.12	4.48829e-05
		1335.29	4.00322e-05
		1336.47	3.56492e-05
		1337.65	3.16957e-05
		1338.82	2.81357e-05
		1340	2.49356e-05
		1341.18	2.20014e-05
		1342.35	1.94401e-05
		1343.53	1.7121e-05
		1344.71	1.50481e-05
		1345.88	1.32341e-05
		1347.06	1.16195e-05
		1348.24	1.01849e-05
		1349.41	8.9127e-06
		1350.59	7.75837e-06
		1351.76	6.76787e-06
		1352.94	5.8939e-06
		1354.12	5.12416e-06
		1355.29	4.44743e-06
		1356.47	3.82173e-06
		1357.65	3.30719e-06
		1358.82	2.85703e-06
		1360	2.46389e-06
		1361.18	2.1212e-06
		1362.35	1.82302e-06
		1363.53	1.56406e-06
		1364.71	1.30752e-06
		1365.88	1.11882e-06
		1367.06	9.55665e-07
		1368.24	8.14868e-07
		1369.41	6.93592e-07
		1370.59	5.89325e-07
		1371.76	4.66775e-07
		1372.94	3.68074e-07
		1374.12	3.12247e-07
		1375.29	2.64396e-07
		1376.47	2.23462e-07
		1377.65	1.88514e-07
		1378.82	1.58736e-07
		1380	1.33413e-07
		1381.18	1.11922e-07
		1382.35	9.37177e-08
		1383.53	7.83288e-08
		1384.71	6.53451e-08
		1385.88	5.44123e-08
		1387.06	4.52244e-08
		1388.24	3.7518e-08
		1389.41	0
		1390.59	0
		1391.76	0
		1392.94	0
		1394.12	0
		1395.29	0
		1396.47	0
		1397.65	0
		1398.82	0
		IsoLine	IsoLine

## Sheet: Table S8
	Supplemental Table S8. Results of the EPMA analyses and Al-in-olivine thermometry for the olivine-spinel pairs analysed in this study, normal MORB data and large igneous provinces OIB data from Coogan et al. (2014)																																				X1 =	0.575	σ1 =	0.162	X2 =	0.884	σ2 =	0.043	X3 =	0.897	σ3 =	0.025
																																					X4 =	σ4 =
	Note	Data source	Olivine sample	Location	SiO2	Al2O3	stdev	Cr2O3	FeO	MnO	MgO	CaO	Na2O	NiO	P2O5	Total	Fo	Fo-recalculation	Spinel	SiO2	TiO2	Al2O3	Cr2O3	FeO	MnO	MgO	CaO	Na2O	K2O	NiO	P2O5	Total	Cr#	Cr#-recalculation	T (°C)	σ ( °C)	Ln(Kd)	2SE		f	2SE		T-recalculation	2σ ( °C)	T-recalculation2	σ ( °C)
	equilbrium	This study	30I-TVG02-1	Mountain Jourdanne	39.791	0.022	0.003	0.061	13.142	0.239	46.854	0.305	0.025	0.169	below detection limit	100.657	86.1883	86.4034	262	0.105	0.907	25.211	36.818	21.186	0.295	13.815	0.021	0.012	0	0.034		98.404		0.494852			-7.04399	0.136364		7.33091	0.269573		1090.94	50.1604	1090.94	25.0802
	equilbrium	This study	30I-TVG02-1	Mountain Jourdanne	39.584	0.024	0.003	0.021	13.112	0.203	46.652	0.291	0.041	0.1	below detection limit	100.028	86.1961	86.3794	262	0.105	0.907	25.211	36.818	21.186	0.295	13.815	0.021	0.012	0	0.034		98.404		0.494852			-6.95698	0.125		7.25286	0.263664		1105.62	50.1224	1105.62	25.0612
	equilbrium	This study	30I-TVG02-1	Mountain Jourdanne	39.791	0.022	0.003	0.061	13.142	0.239	46.854	0.305	0.025	0.169	below detection limit	100.657	86.1883	86.4034	262-r1	0.066	0.47	31.915	30.788	20.075	0.187	14.312	0.013	0	0.017	0.084		97.927		0.392873			-7.27979	0.136364		7.45227	0.273154		1068.72	49.1848	1068.72	24.5924
	equilbrium	This study	30I-TVG02-1	Mountain Jourdanne	39.584	0.024	0.003	0.021	13.112	0.203	46.652	0.291	0.041	0.1	below detection limit	100.028	86.1961	86.3794	262-r1	0.066	0.47	31.915	30.788	20.075	0.187	14.312	0.013	0	0.017	0.084		97.927		0.392873			-7.19278	0.125		7.37422	0.267276		1082.93	49.1505	1082.93	24.5752
	equilbrium	This study	30I-TVG02-1	Mountain Jourdanne	39.791	0.022	0.003	0.061	13.142	0.239	46.854	0.305	0.025	0.169	below detection limit	100.657	86.1883	86.4034	262-r2	0.078	0.502	28.825	32.596	22.164	0.256	12.986	0.021	0.127	0.001	0.045		97.601		0.431348			-7.17796	0.136364		7.39494	0.271573		1079.13	49.6612	1079.13	24.8306
	equilbrium	This study	30I-TVG02-1	Mountain Jourdanne	39.584	0.024	0.003	0.021	13.112	0.203	46.652	0.291	0.041	0.1	below detection limit	100.028	86.1961	86.3794	262-r2	0.078	0.502	28.825	32.596	22.164	0.256	12.986	0.021	0.127	0.001	0.045		97.601		0.431348			-7.09094	0.125		7.31689	0.26568		1093.55	49.6257	1093.55	24.8128
	Normal MORB data	Coogan et al. (2014 JP)	A25-D20-8	Siqueiros	40.9492	0.067	0.00469042	0.05975	8.854	0.14475	49.3065	0.296	0.00025	0.31375	0.0185	100.01	90.8455	90.8476		0	0.248333	40.0987	27.1073	11.8053	0.168667	19.1317	0.00666667	0.000666667	0	0.239	0	98.8063	0.312073	0.311989	1245.22		-6.39441	0.0700062		6.58658	0.236479		1245.09	54.5097	1245.09	27.2548
	Normal MORB data	Coogan et al. (2014 JP)	A25-D20-8	Siqueiros	40.939	0.04125	0.0047132	0.067125	8.94975	0.134	49.5209	0.29	0.003375	0.329375	0.0025	100.277	90.792	90.7941		0	0.262	41.726	25.019	11.424	0.144	19.511	0.039	0	0	0.259	0	98.384	0.286919	0.286838	1148.43		-6.91923	0.114259		7.03511	0.258501		1148.29	52.23	1148.29	26.115
	Normal MORB data	Coogan et al. (2014 JP)	020-5	Siqueiros	40.8122	0.0374444	0.00233193	0.0508333	8.57311	0.147667	49.1367	0.291278	0.003	0.307	0.00455556	99.3638	91.0822	91.0842		0	0.269375	38.9939	26.6821	11.4164	0.153375	19.0701	0.009875	0.000625	0	0.23925	0.00075	96.8358	0.314682	0.314598	1138.27		-6.9483	0.0622771		7.08573	0.244381		1138.14	48.6741	1138.14	24.337
	Normal MORB data	Coogan et al. (2014 JP)	020-6	Siqueiros	40.8694	0.0335	0.00765697	0.0527143	8.8195	0.143571	49.3241	0.292357	0.00371429	0.317929	0.0141429	99.8709	90.8809	90.883		0	0.241	37.076	29.6267	12.3173	0.163333	18.943	0.0276667	0.00466667	0	0.261333	0.000666667	98.6617	0.349053	0.348964	1121.55		-7.00918	0.228566		7.17072	0.314975		1121.41	61.2563	1121.41	30.6282
	Normal MORB data	Coogan et al. (2014 JP)	020-6	Siqueiros	40.8626	0.052	0.00308221	0.0546	8.8162	0.1498	49.0524	0.2914	0.0024	0.3006	0.0008	99.5828	90.8381	90.8402		0	0.241	37.076	29.6267	12.3173	0.163333	18.943	0.0276667	0.00466667	0	0.261333	0.000666667	98.6617	0.349053	0.348964	1202.71		-6.56948	0.0592732		6.77631	0.237213		1202.58	51.6596	1202.58	25.8298
	Normal MORB data	Coogan et al. (2014 JP)	020-6	Siqueiros	40.6042	0.041	0.00158114	0.0564	9.8386	0.1634	48.0736	0.305	0.0034	0.255	0.0028	99.3434	89.6984	89.7007		0	0.241	37.076	29.6267	12.3173	0.163333	18.943	0.0276667	0.00466667	0	0.261333	0.000666667	98.6617	0.349053	0.348964	1157.7		-6.80715	0.0385644		6.9895	0.237963		1157.57	48.71	1157.57	24.355
	Normal MORB data	Coogan et al. (2014 JP)	020-6	Siqueiros	40.7273	0.0663333	0.00472582	0.066	8.28033	0.140667	48.8443	0.292	0.002	0.307	0	98.726	91.3132	91.3151		0	0.241	37.076	29.6267	12.3173	0.163333	18.943	0.0276667	0.00466667	0	0.261333	0.000666667	98.6617	0.349053	0.348964	1251.85		-6.32603	0.0712435		6.55794	0.235722		1251.72	54.8107	1251.72	27.4053
	Normal MORB data	Coogan et al. (2014 JP)	020-6	Siqueiros	40.8931	0.056625	0.00603186	0.06275	8.5825	0.140313	49.0981	0.288812	0.002125	0.316	0.00275	99.4431	91.0669	91.0689		0	0.241	37.076	29.6267	12.3173	0.163333	18.943	0.0276667	0.00466667	0	0.261333	0.000666667	98.6617	0.349053	0.348964	1219.55		-6.48427	0.106523		6.69988	0.248752		1219.41	55.4158	1219.41	27.7079
	Normal MORB data	Coogan et al. (2014 JP)	2384-1	Siqueiros	41.052	0.0545	0.00353553	0.068	8.4045	0.1535	49.202	0.2945	0	0.2925	0.0005	99.522	91.2528	91.2548		0	0.237	41.09	25.274	11.247	0.151	19.147	0.025	0	0	0.229	0	97.4	0.292164	0.292083	1202.76		-6.62532	0.0648722		6.77611	0.239212		1202.62	52.098	1202.62	26.049
	Normal MORB data	Coogan et al. (2014 JP)	2384-1	Siqueiros	41.0853	0.06175	0.00221736	0.06525	8.515	0.14425	49.1943	0.2915	0.00075	0.30075	0.00125	99.66	91.1467	91.1487		0	0.243	36.284	29.502	12.011	0.168	18.691	0.011	0	0	0.214	0	97.124	0.353012	0.352922	1240.69		-6.37604	0.0359086		6.60629	0.230044		1240.56	52.7104	1240.56	26.3552
	Normal MORB data	Coogan et al. (2014 JP)	2384-1	Siqueiros	41.1507	0.0503333	0.00404145	0.0556667	8.82633	0.141	49.3597	0.288333	0.00433333	0.304333	0.003	100.184	90.8805	90.8825		0	0.243	36.284	29.502	12.011	0.168	18.691	0.011	0	0	0.214	0	97.124	0.353012	0.352922	1199.81		-6.58046	0.0802937		6.78966	0.242334		1199.68	52.5676	1199.68	26.2838
	Normal MORB data	Coogan et al. (2014 JP)	2384-1	Siqueiros	40.89	0.0537778	0.00263523	0.0624444	8.59233	0.143	49.2844	0.287778	0.00211111	0.314333	0.00922222	99.6394	91.0884	91.0904		0	0.281	38.179	27.236	11.71	0.152	19.322	0.029	0	0	0.244	0	97.153	0.323736	0.32365	1208.45		-6.56518	0.0490022		6.75007	0.235177		1208.32	51.6152	1208.32	25.8076
	Normal MORB data	Coogan et al. (2014 JP)	2384-11	Siqueiros	40.4785	0.0403333	0.00196638	0.0708333	10.604	0.1815	47.323	0.302833	0.001	0.2375	0.0291667	99.2717	88.8301	88.8325		0	0.596667	28.624	33.4263	17.141	0.220333	15.5573	0.101333	0.00533333	0	0.158333	0.00233333	95.833	0.439348	0.439251	1186.42		-6.56482	0.0487533		6.85194	0.235476		1186.29	50.1555	1186.29	25.0777
	Normal MORB data	Coogan et al. (2014 JP)	2384-11	Siqueiros	40.3892	0.03675	0.0057373	0.275	10.5693	0.1875	47.2532	0.31875	0.00875	0.22025	0.01475	99.2735	88.848	88.8504		0.009	0.6165	28.604	32.963	16.8905	0.2255	15.4685	0.139	0	0	0.16	0	95.076	0.436084	0.435988	1169.59		-6.65716	0.156117		6.93189	0.271854		1169.46	56.576	1169.46	28.288
	Normal MORB data	Coogan et al. (2014 JP)	2384-11	Siqueiros	40.5437	0.0606667	0.00321455	0.0786667	10.4877	0.174333	47.4683	0.311667	0.004	0.238333	0.0456667	99.413	88.9692	88.9716		0.009	0.6165	28.604	32.963	16.8905	0.2255	15.4685	0.139	0	0	0.16	0	95.076	0.436084	0.435988	1269.65		-6.15591	0.0529871		6.48226	0.229214		1269.52	54.5491	1269.52	27.2746
	Normal MORB data	Coogan et al. (2014 JP)	DSDP64-474A-42R1 77-79	Gulf of California	40.7617	0.06975	0.00170783	0.05825	11.052	0.1575	48.3085	0.28925	0.00225	0.32	0.0135	101.033	88.6223	88.6248		0.0113333	0.360333	41.2153	23.6283	14.8163	0.173667	18.458	0.002	0	0	0.233333	0	98.8987	0.277826	0.277747	1254.9		-6.38165	0.0244849		6.54487	0.228741		1254.76	53.4001	1254.76	26.7001
	Normal MORB data	Coogan et al. (2014 JP)	DSDP64-474A-42R1 77-79	Gulf of California	40.689	0.061	0	0.104	11.75	0.187	47.851	0.297	0	0.297	0.003	101.239	87.8891	87.8918		0.0113333	0.360333	41.2153	23.6283	14.8163	0.173667	18.458	0.002	0	0	0.233333	0	98.8987	0.277826	0.277747	1227.34		-6.51569	0		6.6651	0.230045		1227.2	51.7843	1227.2	25.8922
	Normal MORB data	Coogan et al. (2014 JP)	DSDP64-474A-42R1 77-79	Gulf of California	40.826	0.0605	0.00494975	0.0485	10.865	0.1735	48.3235	0.2865	0.0055	0.315	0.0055	100.932	88.7963	88.7988		0.0113333	0.360333	41.2153	23.6283	14.8163	0.173667	18.458	0.002	0	0	0.233333	0	98.8987	0.277826	0.277747	1225.68		-6.52392	0.081814		6.67249	0.241606		1225.54	54.2665	1225.54	27.1332
	Normal MORB data	Coogan et al. (2014 JP)	JR63-31-11	15N MAR	41.2332	0.0552	0.00148324	0.1112	10.5626	0.1578	49.4316	0.2738	0.0064	0.3368	0	102.175	89.2928	89.2952		0.0055	0.4395	36.8015	28.063	15.23	0.1735	17.4995	0	0.0105	0.0045	0.252	0	98.4795	0.338498	0.33841	1218.02		-6.50233	0.0268703		6.70675	0.231218		1217.89	51.4042	1217.89	25.7021
	Normal MORB data	Coogan et al. (2014 JP)	NZ-9-1	Hess Deep	40.5187	0.050875	0.00527629	0.051875	14.3286	0.21225	46.0832	0.29875	0.012	0.21875	0	101.784	85.1438	85.1469		0	0.425333	28.924	34.9397	19.7765	0.241667	14.8688	0.0258333	0.00583333	0.00416667	0.130667	0	99.3425	0.447703	0.447606	1228.39		-6.34306	0.103711		6.6604	0.245795		1228.26	55.408	1228.26	27.704
	Normal MORB data	Coogan et al. (2014 JP)	NZ-9-1	Hess Deep	40.3912	0.0454	0.0061887	0.0402	14.1258	0.2416	45.8264	0.3034	0.0154	0.2194	0	101.211	85.2531	85.2562		0.0575	0.491	26.5685	35.948	19.697	0.265	13.902	0.1295	0.0145	0.002	0.1545	0	97.2295	0.475879	0.475781	1217.02		-6.37197	0.136315		6.71125	0.258824		1216.89	57.4643	1216.89	28.7321
	Normal MORB data	Coogan et al. (2014 JP)	DSDP88 581C-3-1 (117-119)	NW Pacific	40.527	0.0432	0.00319026	0.069	12.1544	0.1913	46.8513	0.2947	0	0.3122	0	100.451	87.2919	87.2947		0.009	0.304	38.9155	24.9935	18.0515	0.2095	16.255	0.0115	0	0	0.2365	0	99.0465	0.30118	0.301098	1167.13		-6.80331	0.0738487		6.94374	0.244393		1167	50.6876	1167	25.3438
	Normal MORB data	Coogan et al. (2014 JP)	DSDP88 581C-3-1 (117-119)	NW Pacific	40.3552	0.0396667	0.000816497	0.0815	12.5058	0.195167	46.3272	0.299667	0	0.275333	0	100.081	86.8444	86.8472		0.057	0.242	38.968	24.851	16.896	0.166	16.491	0.011	0	0	0.229	0	97.992	0.299695	0.299613	1151.45		-6.88998	0.0205839		7.02017	0.237531		1151.32	48.1974	1151.32	24.0987
	Normal MORB data	Coogan et al. (2014 JP)	DSDP88 581C-3-2 (20-22)	NW Pacific	40.4938	0.0386667	0.0010328	0.058	11.7477	0.193333	47.1055	0.296667	0	0.296	0	100.231	87.7231	87.7258		0	0.2415	38.8815	24.9635	16.0805	0.193	16.746	0.0135	0	0	0.2315	0	97.4275	0.301111	0.301029	1146.97		-6.9133	0.0267102		7.04234	0.238446		1146.83	48.0792	1146.83	24.0396
	Normal MORB data	Coogan et al. (2014 JP)	DSDP88 581C-3-2 (40-42)	NW Pacific	40.317	0.0385	0.00459347	0.2455	13.3665	0.222	45.8305	0.324	0	0.238	0	100.582	85.9354	85.9384		0	0.3115	38.1845	25.007	18.3535	0.21	15.7905	0.0055	0	0	0.1915	0	98.1255	0.305301	0.305218	1148.71		-6.89953	0.119311		7.03369	0.260043		1148.58	52.5628	1148.58	26.2814
	Normal MORB data	Coogan et al. (2014 JP)	DSDP88 581C-3-2 (40-42)	NW Pacific	40.2636	0.0352857	0.0011127	0.0538571	12.204	0.200571	46.4681	0.299286	0	0.269714	0	99.8006	87.155	87.1578		0.037	0.29	38.436	24.338	18.31	0.229	15.571	0.019	0	0	0.201	0	97.535	0.298204	0.298122	1133.16		-6.99327	0.0315339		7.1115	0.240363		1133.02	47.5275	1133.02	23.7638
	Normal MORB data	Coogan et al. (2014 JP)	DSDP88 581C-3-3 (18-20)	NW Pacific	40.0503	0.042	0.00368782	0.0658333	11.7105	0.192667	46.5195	0.3325	0	0.287	0	99.2065	87.6221	87.6248		0.066	0.278	38.722	25.167	16.003	0.187	16.69	0.063	0	0	0.214	0	97.436	0.303691	0.303608	1162.37		-6.82649	0.0878052		6.96675	0.248482		1162.24	51.1958	1162.24	25.5979
	Normal MORB data	Coogan et al. (2014 JP)	DSDP88 581C-3-3 (93-95)	NW Pacific	40.2425	0.048625	0.00118773	0.07375	10.8247	0.173875	47.4211	0.311625	0	0.32275	0	99.4241	88.6448	88.6473		0.028	0.262	39.283	25.706	14.299	0.172	17.649	0.004	0	0	0.254	0	97.72	0.305132	0.305049	1186.93		-6.69441	0.0244264		6.84955	0.234319		1186.8	49.9441	1186.8	24.9721
	Normal MORB data	Coogan et al. (2014 JP)	DSDP88 581C-3-3 (93-95)	NW Pacific	40.5403	0.04175	0.00337004	0.076375	11.0799	0.1745	47.4406	0.301625	0	0.320875	0	99.9826	88.4124	88.415		0.418	0.246	39.478	25.264	14.637	0.156	17.915	0.007	0	0	0.259	0	98.397	0.300426	0.300343	1158.3		-6.8518	0.0807194		6.98657	0.246972		1158.17	50.5965	1158.17	25.2982
	Normal MORB data	Coogan et al. (2014 JP)	DSDP88 581C-3-3 (93-95)	NW Pacific	40.3923	0.0486	0.00383551	0.1088	11.2561	0.1761	47.2328	0.2968	0	0.318	0	99.8348	88.2042	88.2068		0.069	0.27	39.185	25.259	16.292	0.206	16.67	0.005	0	0	0.248	0	98.234	0.301952	0.301869	1187.91		-6.69243	0.0789199		6.84496	0.243755		1187.78	52.0251	1187.78	26.0125
	OIB data	Coogan et al. (2014 JP)	AND-90-7	Madagascar	41.1019	0.081875	0.00210017	0.102625	7.98875	0.121	50.1281	0.249875	0.00425	0.63225	0.00425	100.415	91.791	91.7929		0.071	0.529	23.635	41.984	14.193	0.233	17.355	0	0	0	0.318	0	98.318	0.5438	0.543703	1356.33		-5.66529	0.0256509		6.1374	0.217669		1356.2	57.7866	1356.2	28.8933
	OIB data	Coogan et al. (2014 JP)	AND-90-7	Madagascar	40.9597	0.135333	0.00305505	0.0946667	7.93967	0.104667	49.7363	0.246	0.00533333	0.621333	0.00466667	99.8527	91.7783	91.7802		0.071	0.529	23.635	41.984	14.193	0.233	17.355	0	0	0	0.318	0	98.318	0.5438	0.543703	1485.49		-5.16274	0.0225743		5.68661	0.209426		1485.37	64.7625	1485.37	32.3812
	OIB data	Coogan et al. (2014 JP)	AND-90-7	Madagascar	40.9503	0.07825	0.00511999	0.097875	8.14625	0.115125	49.8361	0.25075	0.008125	0.618	0.0035	100.107	91.5978	91.5997		0.076	0.567	23.372	42.067	14.348	0.203	17.389	0	0	0.012	0.334	0	98.368	0.547065	0.546967	1347.5		-5.69939	0.0654312		6.17087	0.224819		1347.37	59.0393	1347.37	29.5197
	OIB data	Coogan et al. (2014 JP)	AND-90-7	Madagascar	40.77	0.0474167	0.00650117	0.11875	10.2939	0.147417	48.5216	0.245417	0.00575	0.242333	0.00725	100.4	89.3613	89.3637		0.028	0.54	22.413	43.648	14.415	0.159	17.046	0	0	0	0.263	0	98.512	0.566506	0.566409	1242.18		-6.15842	0.137107		6.59981	0.256255		1242.04	58.8313	1242.04	29.4157
	OIB data	Coogan et al. (2014 JP)	AND-90-7	Madagascar	40.6482	0.0485833	0.00274552	0.121167	10.2472	0.145917	48.4899	0.24475	0.00608333	0.243667	0.00158333	100.198	89.3983	89.4007		0.063	0.578	23.727	41.419	14.915	0.173	17.051	0.007	0	0.009	0.29	0	98.232	0.539472	0.539375	1240.94		-6.19109	0.0565116		6.60521	0.230884		1240.81	52.9201	1240.81	26.46
	OIB data	Coogan et al. (2014 JP)	917A 57-3-85	SE Greenland	40.3909	0.0395556	0.00371184	0.0373333	11.8768	0.188667	47.3014	0.310889	0.00166667	0.267222	0.0184444	100.433	87.6499	87.6526		0	0.9835	27.8035	31.8945	24.6515	0.252	12.973	0.008	0.002	0	0.137	0	98.705	0.434962	0.434865	1189.09		-6.55521	0.0938387		6.83945	0.24604		1188.96	52.5973	1188.96	26.2987
	OIB data	Coogan et al. (2014 JP)	917A 57-3-85	SE Greenland	40.3001	0.0337	0.0053135	0.0357	11.9739	0.1847	47.3282	0.3128	0.0045	0.2815	0.0087	100.464	87.5677	87.5704		0.044	0.3695	29.451	35.3525	15.902	0.227	14.794	0.0505	0.0055	0	0.171	0	96.367	0.446143	0.446046	1146.5		-6.77299	0.157671		7.04467	0.274382		1146.36	55.2883	1146.36	27.6442
	OIB data	Coogan et al. (2014 JP)	917A 57-3-85	SE Greenland	40.8077	0.068	0.00827043	0.0638947	9.64653	0.148789	48.9945	0.383421	0.00157895	0.323842	0.00231579	100.442	90.0504	90.0527		0	2.166	22.189	32.149	31.991	0.347	8.76	0.025	0.008	0	0.071	0	97.706	0.49297	0.492872	1339.26		-5.78784	0.121624		6.20239	0.243992		1339.13	63.4245	1339.13	31.7123
	OIB data	Coogan et al. (2014 JP)	917A 57-13-2-40	SE Greenland	40.2991	0.0573333	0.00295804	0.0687778	10.0663	0.150778	48.2887	0.318889	0.00166667	0.319778	0.00266667	99.574	89.5269	89.5293		0.0055	0.256	28.2155	35.351	18.176	0.215	15.241	0.004	0	0	0.1935	0	97.6575	0.456745	0.456648	1256.28		-6.19874	0.0515937		6.53895	0.229753		1256.15	53.7336	1256.15	26.8668
	OIB data	Coogan et al. (2014 JP)	917A 57-7-17	SE Greenland	40.1843	0.0421429	0.00106904	0.0602857	11.0907	0.163571	47.9406	0.319	0	0.293714	0	100.1	88.5095	88.512		0	1.162	27.091	34.827	18.902	0.226	14.24	0.055	0	0	0.187	0	96.76	0.463138	0.46304	1200.99		-6.46589	0.0253672		6.78423	0.230842		1200.86	50.1549	1200.86	25.0775
	OIB data	Coogan et al. (2014 JP)	917A 57-7-17	SE Greenland	40.1371	0.0402941	0.00734647	0.0634118	11.4678	0.169647	47.6931	0.306824	0	0.288	0	100.171	88.1109	88.1135		0	1.26275	24.9415	33.8098	25.277	0.26025	11.8415	0.0065	0	0	0.16825	0	97.6085	0.476345	0.476247	1205.84		-6.42808	0.182321		6.76199	0.281486		1205.7	61.5613	1205.7	30.7807
	OIB data	Coogan et al. (2014 JP)	917A 57-7-17	SE Greenland	39.5827	0.0606667	0.00196638	0.0763333	10.2372	0.141	47.8462	0.306833	0	0.306667	0	98.5628	89.2803	89.2827		0.0245	0.30725	28.956	33.6545	19.0237	0.225	14.427	0.00575	0	0	0.19325	0	96.8612	0.438183	0.438087	1266.6		-6.16814	0.0324129		6.49509	0.226325		1266.47	53.649	1266.47	26.8245
	OIB data	Coogan et al. (2014 JP)	917A 57-7-17	SE Greenland	39.7805	0.0585	0.00129099	0.16775	9.903	0.156	48.179	0.33125	0	0.30525	0	98.8885	89.6583	89.6606		0.026	0.313	28.527	33.88	19.998	0.264	13.736	0.005	0	0	0.202	0	97.019	0.443509	0.443412	1260.95		-6.18958	0.0220683		6.51903	0.225707		1260.82	53.1104	1260.82	26.5552
	OIB data	Coogan et al. (2014 JP)	917A 57-1-99	SE Greenland	39.7775	0.0715	0.00925563	0.0715	9.74475	0.1405	48.283	0.37725	0	0.31675	0	98.798	89.8264	89.8287		2.292	2.03	22.385	30.163	28.063	0.315	10.347	0.436	0	0	0.12	0	96.237	0.474851	0.474753	1353.19		-5.74645	0.129449		6.14925	0.246541		1353.07	65.1995	1353.07	32.5998
	OIB data	Coogan et al. (2014 JP)	917A 57-1-99	SE Greenland	39.8187	0.0523333	0.00568624	0.0843333	10.4713	0.178333	47.9163	0.353	0	0.304667	0	99.191	89.0762	89.0786		2.292	2.03	22.385	30.163	28.063	0.315	10.347	0.436	0	0	0.12	0	96.237	0.474851	0.474753	1282.39		-6.05851	0.108654		6.42917	0.243106		1282.26	58.8149	1282.26	29.4074
	OIB data	Coogan et al. (2014 JP)	GOR 94-20	Gorgona	40.6394	0.0631429	0.00614894	0.128571	8.78829	0.134857	49.4767	0.331429	0	0.417286	0	99.9873	90.9358	90.9378		0	0.316	18.8515	45.322	15.244	0.2155	16.5085	0.0395	0	0	0.262	0	96.7825	0.617345	0.617252	1331.44		-5.69895	0.0973815		6.23261	0.234259		1331.32	60.3056	1331.32	30.1528
	OIB data	Coogan et al. (2014 JP)	GOR 94-20	Gorgona	40.616	0.0612	0.00535724	0.1344	8.6884	0.1338	49.4712	0.332	0	0.4106	0	99.8586	91.0286	91.0306		0.006	0.3415	20.582	42.4155	16.914	0.215	15.1845	0.02	0	0	0.2455	0	95.9505	0.580345	0.580249	1312.59		-5.81802	0.0875366		6.30671	0.232783		1312.46	58.5255	1312.46	29.2628
	OIB data	Coogan et al. (2014 JP)	GOR 94-20	Gorgona	40.468	0.054	0	0.27	11.564	0.175	46.358	0.349	0	0.301	0	99.539	87.7206	87.7232		0.006	0.3415	20.582	42.4155	16.914	0.215	15.1845	0.02	0	0	0.2455	0	95.9505	0.580345	0.580249	1284.86		-5.94319	0		6.41898	0.221229		1284.73	53.6922	1284.73	26.8461
	OIB data	Coogan et al. (2014 JP)	GOR 94-20	Gorgona	40.1936	0.0528	0.00204396	0.1129	10.8847	0.1778	47.6318	0.3532	0	0.3213	0	99.7353	88.6339	88.6364		0	0.3385	21.7405	42.247	14.7615	0.1805	16.9735	0.0215	0	0	0.2785	0	96.546	0.565975	0.565879	1271.25		-6.02042	0.0387114		6.47555	0.225156		1271.12	53.6945	1271.12	26.8472
	OIB data	Coogan et al. (2014 JP)	GOR 94-20	Gorgona	40.5786	0.0626667	0.0033541	0.112222	8.719	0.140667	49.2634	0.333556	0	0.405778	0	99.6237	90.9653	90.9674		0	0.351	22.011	40.5015	17.92	0.225	14.709	0.043	0	0	0.2525	0	96.045	0.552528	0.552431	1308.99		-5.86147	0.0535229		6.32109	0.224914		1308.86	56.2902	1308.86	28.1451
	OIB data	Coogan et al. (2014 JP)	GOR 94-41	Gorgona	40.051	0.086	0	0.342	10.105	0.151	47.881	0.333	0	0.392	0	99.341	89.4109	89.4133		0	0.346	20.758	43.591	17.334	0.238	14.457	0.019	0	0	0.239	0	97.003	0.584922	0.584827	1389.98		-5.48634	0		6.01323	0.21375		1389.85	59.1138	1389.85	29.5569
	OIB data	Coogan et al. (2014 JP)	GOR 94-41	Gorgona	40.8403	0.05	0.003	0.119667	8.927	0.139	49.3227	0.329667	0	0.411667	0	100.15	90.7798	90.7818		0	0.35	21.367	42.6325	17.613	0.245	14.564	0.0065	0	0	0.2515	0	97.0595	0.572452	0.572356	1261.99		-6.05758	0.06		6.51461	0.229522		1261.86	54.0813	1261.86	27.0406
	OIB data	Coogan et al. (2014 JP)	GOR 94-41	Gorgona	40.8444	0.104143	0.00979115	0.176571	7.97729	0.127429	49.5331	0.327286	0	0.421714	0	99.5169	91.7115	91.7134		0	0.3165	21.2675	43.5815	14.684	0.2005	16.3805	0.011	0	0	0.258	0	96.7285	0.57897	0.578874	1434.04		-5.31917	0.0940166		5.85802	0.227286		1433.91	66.2326	1433.91	33.1163
	OIB data	Coogan et al. (2014 JP)	GOR 94-41	Gorgona	40.78	0.07	0	0.265	7.933	0.15	49.673	0.344	0	0.41	0	99.642	91.775	91.7769		0	0.3165	21.2675	43.5815	14.684	0.2005	16.3805	0.011	0	0	0.258	0	96.7285	0.57897	0.578874	1336.15		-5.71644	0		6.21437	0.217456		1336.02	56.3089	1336.02	28.1545
	OIB data	Coogan et al. (2014 JP)	GOR 94-41	Gorgona	40.5123	0.0676667	0.00472582	0.137	9.208	0.142667	48.8517	0.329333	0	0.403	0	99.6563	90.4344	90.4365		0	0.39	23.045	40.366	17.17	0.24	14.988	0.015	0	0	0.254	0	96.48	0.54032	0.540223	1318.67		-5.83061	0.0698396		6.28261	0.227938		1318.54	57.7478	1318.54	28.8739
	OIB data	Coogan et al. (2014 JP)	GOR 94-41	Gorgona	40.395	0.06	0.00141421	0.105833	9.63633	0.162833	48.2185	0.343667	0	0.3635	0	99.2927	89.9161	89.9183		0	0.3435	21.623	43.508	15.4095	0.206	16.1575	0.006	0	0	0.268	0	97.5355	0.574511	0.574415	1298.42		-5.88717	0.0235702		6.36357	0.221275		1298.29	54.6426	1298.29	27.3213
	OIB data	Coogan et al. (2014 JP)	GOR 94-44	Gorgona	40.665	0.057	0.00316228	0.1396	9.6434	0.156	48.7646	0.345	0	0.4036	0	100.18	90.0111	90.0134		0	0.357	23.599	38.512	24.746	0.297	10.966	0.082	0	0	0.175	0	98.787	0.522699	0.522601	1279.24		-6.02591	0.0554786		6.44222	0.22786		1279.11	54.9031	1279.11	27.4516
	OIB data	Coogan et al. (2014 JP)	GOR 94-44	Gorgona	40.6702	0.093	0.0069282	0.13275	8.49425	0.1475	49.316	0.33275	0	0.4305	0	99.6188	91.1863	91.1883		0	0.346	22.424	39.46	21.285	0.312	12.042	0.08	0	0	0.225	0	96.235	0.541467	0.541369	1400.93		-5.48529	0.0744968		5.97387	0.223733		1400.81	62.6929	1400.81	31.3465
	OIB data	Coogan et al. (2014 JP)	GOR 94-44	Gorgona	40.7835	0.074	0.0070993	0.1355	8.3595	0.150333	49.3885	0.333333	0	0.431167	0	99.6687	91.3256	91.3275		0	0.3545	22.52	41.077	18.107	0.269	14.2125	0.021	0	0	0.231	0	96.842	0.550363	0.550266	1342.34		-5.71809	0.0959364		6.19057	0.233762		1342.21	60.9977	1342.21	30.4988
	OIB data	Coogan et al. (2014 JP)	GOR 94-44	Gorgona	40.545	0.0876667	0.00378594	0.1355	8.519	0.146	49.2788	0.3295	0	0.4255	0	99.4645	91.1568	91.1588		0	0.3385	22.114	41.4055	17.582	0.259	14.6445	0.0175	0	0	0.24	0	96.6135	0.556827	0.55673	1385.92		-5.53042	0.0431856		6.02794	0.217793		1385.79	59.9385	1385.79	29.9692
	OIB data	Coogan et al. (2014 JP)	GOR 94-29	Gorgona	40.334	0.064	0.00360555	0.133	11.643	0.189	47.0457	0.365667	0	0.297333	0	100.072	87.8056	87.8082		0	0.374	23.7785	41.0395	14.4675	0.2085	17.3645	0.052	0	0	0.296	0	97.582	0.536646	0.536548	1299.94		-5.91765	0.0563367		6.35744	0.226311		1299.81	55.9939	1299.81	27.9969
	OIB data	Coogan et al. (2014 JP)	GOR 94-29	Gorgona	40.6229	0.0612857	0.00303942	0.188714	9.23186	0.154571	48.8046	0.341429	0	0.412571	0	99.8191	90.4036	90.4058		0	0.3985	24.492	39.941	15.243	0.202	16.931	0.054	0	0	0.306	0	97.6035	0.522522	0.522424	1286.96		-5.99056	0.0495943		6.41035	0.226179		1286.83	55.0413	1286.83	27.5206
	OIB data	Coogan et al. (2014 JP)	GOR 94-27	Gorgona	40.7152	0.0528333	0.00407022	0.116833	8.94533	0.145167	49.022	0.332833	0	0.4255	0	99.7612	90.7112	90.7133		0	0.3625	22.936	41.7625	16.1505	0.231	15.8655	0.009	0	0	0.285	0	97.625	0.549929	0.549832	1263.36		-6.07332	0.0770388		6.50882	0.233734		1263.23	55.1718	1263.23	27.5859
	OIB data	Coogan et al. (2014 JP)	GOR 94-27	Gorgona	40.6463	0.0456667	0.00469042	0.102	9.1755	0.1525	48.6185	0.3375	0	0.41225	0	99.4973	90.4236	90.4257		0	0.362	23.723	40.878	17.433	0.24	15.031	0.005	0	0	0.26	0	97.946	0.536246	0.536149	1228.99		-6.25283	0.10271		6.65775	0.244335		1228.86	55.1229	1228.86	27.5614
	OIB data	Coogan et al. (2014 JP)	GOR 94-27	Gorgona	40.5125	0.06475	0.00386221	0.329667	9.607	0.161833	48.4128	0.3325	0	0.407667	0	99.823	89.98	89.9823		0.0135	0.3885	20.165	39.1385	17.218	0.236	15.651	0.0085	0	0	0.254	0	93.0935	0.565681	0.565585	1333.45		-5.74117	0.059648		6.22481	0.224274		1333.33	57.8798	1333.33	28.9399
	OIB data	Coogan et al. (2014 JP)	pad-8	Baffin Island	40.5115	0.04925	0.00525198	0.07675	8.919	0.15125	49.932	0.23925	0.0035	0.3725	0	100.259	90.8895	90.8915		0.00271429	0.453714	18.4771	44.8821	19.4079	0.267429	14.725	0.00485714	0.000285714	0	0.200857	0	98.422	0.619776	0.619684	1279.86		-5.92738	0.106639		6.43966	0.240962		1279.73	58.1062	1279.73	29.0531
	OIB data	Coogan et al. (2014 JP)	dur-8	Baffin Island	40.3655	0.0822	0.0065922	0.131133	8.88513	0.150067	49.1795	0.285467	0.000333333	0.388867	0	99.4719	90.7948	90.7968		0	0.467	17.6205	45.346	20.7845	0.298	12.0635	0.0055	0	0.002	0.1235	0	96.7105	0.633289	0.633198	1407.78		-5.36766	0.0801971		5.94954	0.223981		1407.65	63.2769	1407.65	31.6384
	OIB data	Coogan et al. (2014 JP)	dur-8	Baffin Island	40.7493	0.0773333	0.00774988	0.13	8.52175	0.133	49.9789	0.271833	0.00325	0.412	0	100.278	91.2673	91.2692		0	0.33	19.677	47.165	14.8705	0.213	14.9945	0	0	0.0025	0.1955	0	97.448	0.616636	0.616543	1369.4		-5.53908	0.100214		6.08858	0.232816		1369.27	62.8031	1369.27	31.4015
	OIB data	Coogan et al. (2014 JP)	EM43-3	Emeishan	40.033	0.047	0.005	0.084	10.4715	0.178104	47.968	0.409		0.319504		99.5296	89.0913	89.0889		0.119	0.559	16.385	44.5116	23.895	0.265	12.4214	0.031	0.176				99.4283	0.64569	0.645675	1290.28		-5.85397	0.106383		6.39679	0.239873		1290.13	58.6215	1290.13	29.3107
	OIB data	Coogan et al. (2014 JP)	EM43-8	Emeishan	40.274	0.047	0.005	0.051	10.3289	0.179088	48.294	0.323		0.309362		99.825	89.2888	89.2865		0.082	0.521	15.665	44.3131	24.149	0.278	12.4952	0.02	0.153				98.8223	0.654893	0.654878	1298.18		-5.80904	0.106383		6.36462	0.239235		1298.04	59.0583	1298.04	29.5291
	OIB data	Coogan et al. (2014 JP)	EM43-62	Emeishan	40.174	0.046	0.005	0.088	10.6003	0.185976	48.001	0.443		0.296176		99.8538	88.9787	88.9763		0.119	0.562	18.631	41.9631	23.639	0.288	12.271	0.059	0.156				98.7288	0.601742	0.601727	1267.24		-6.00394	0.108696		6.49246	0.242795		1267.1	57.5997	1267.1	28.7999
	OIB data	Coogan et al. (2014 JP)	EM43-74	Emeishan	40.451	0.039	0.005	0.082	9.2977	0.161376	49.027	0.373		0.33269		99.7815	90.3857	90.3835		0.12	0.697	16.491	45.2368	22.547	0.284	12.3528	0.034	0.161				98.8464	0.647909	0.647894	1248.63		-6.04701	0.128205		6.57191	0.251195		1248.48	58.1606	1248.48	29.0803
	OIB data	Coogan et al. (2014 JP)	EM43-75	Emeishan	40.252	0.046	0.005	0.095	9.9581	0.17712	48.516	0.405		0.329647		99.7969	89.676	89.6737		0.059	0.512	15.325	46.9069	22.38	0.272	12.7966	0.004	0.168				99.4106	0.672485	0.672471	1294.45		-5.8086	0.108696		6.37978	0.240154		1294.3	59.0036	1294.3	29.5018
	OIB data	Coogan et al. (2014 JP)	EM43-76	Emeishan	40.087	0.044	0.005	0.073	11.4105	0.197784	47.393	0.424		0.30429		99.954	88.1025	88.0999		0.063	0.578	15.597	42.2875	27.157	0.31	10.8544	0.017	0.172				98.2888	0.645239	0.645224	1286.73		-5.87064	0.113636		6.41135	0.242784		1286.58	59.0639	1286.58	29.5319
	OIB data	Coogan et al. (2014 JP)	EM43-84	Emeishan	40.43	0.056	0.005	0.119	10.4109	0.181056	48.352	0.425		0.319504		100.311	89.2245	89.2221		0.641	0.561	14.228	44.0704	26.449	0.291	11.8502	0.047	0.15				99.5138	0.6751	0.675085	1355.92		-5.53762	0.0892857		6.13902	0.229492		1355.78	60.8934	1355.78	30.4467
	OIB data	Coogan et al. (2014 JP)	EM43-86	Emeishan	40.228	0.044	0.005	0.077	10.3243	0.179088	48.172	0.425		0.308347		99.7784	89.2689	89.2665		0.053	0.525	17.845	44.2446	22.648	0.288	11.935	0.037	0.153				98.6573	0.62452	0.624504	1262.2		-6.00529	0.113636		6.51381	0.244734		1262.05	57.68	1262.05	28.84
	OIB data	Coogan et al. (2014 JP)	EM43-96	Emeishan	40.418	0.046	0.005	0.102	9.8817	0.17712	48.631	0.432		0.315447		100.023	89.7689	89.7666		0.131	0.618	16.988	43.4348	24.085	0.275	12.3368	0.041	0.175				99.1397	0.631701	0.631685	1280.72		-5.91162	0.108696		6.43613	0.241516		1280.58	58.3037	1280.58	29.1519
	OIB data	Coogan et al. (2014 JP)	EM43-99	Emeishan	40.325	0.044	0.005	0.064	11.4811	0.204672	47.451	0.465		0.291104		100.345	88.0505	88.0479		0.097	0.647	15.93	42.5584	26.2	0.322	11.0536	0.03	0.151				98.1399	0.641858	0.641843	1282.86		-5.89177	0.113636		6.42731	0.243087		1282.71	58.8443	1282.71	29.4221
	OIB data	Coogan et al. (2014 JP)	EM43-101	Emeishan	40.193	0.042	0.005	0.066	10.8325	0.180072	47.776	0.419		0.32559		99.8532	88.7175	88.715		0.087	0.608	15.558	44.0925	24.759	0.275	11.6944	0.017	0.161				98.3731	0.655314	0.655299	1275.05		-5.91466	0.119048		6.45974	0.245572		1274.9	58.8504	1274.9	29.4252
	OIB data	Coogan et al. (2014 JP)	1a-EJH06-12s	Emeishan	40.2046	0.0407	0.005	0.073	14.1955	0.206	45.9948	0.40587		0.297102		101.447	85.2404	85.2404		0.142	0.984	22.4223	39.6906	22.767	0.222	13.24	0.028	0.187				100.62	0.54285	0.542834	1215.9		-6.31158	0.12285		6.71636	0.252645		1215.75	56.0072	1215.75	28.0036
	OIB data	Coogan et al. (2014 JP)	1a-EJH06-14s	Emeishan	39.8342	0.0506	0.005	0.088	14.4207	0.217	45.1954	0.370662		0.316368		100.528	84.8169	84.8169		0.087	0.893	18.845	44.7085	21.902	0.24	12.493	0.011	0.166				100.409	0.614125	0.614109	1282.65		-5.92005	0.0988142		6.42816	0.238122		1282.51	57.6271	1282.51	28.8135
	OIB data	Coogan et al. (2014 JP)	1a-EJH06-31s	Emeishan	40.5511	0.0495	0.005	0.076	11.8732	0.187	47.5956	0.416628		0.316368		101.095	87.7228	87.7228		0.071	0.719	15.7154	47.3944	21.309	0.242	13.096	0.015	0.162				99.7677	0.669213	0.669198	1305.86		-5.76043	0.10101		6.33367	0.236687		1305.71	59.0014	1305.71	29.5007
	OIB data	Coogan et al. (2014 JP)	1a-EJH06-48-1s	Emeishan	39.9047	0.0528	0.005	0.089	13.3751	0.201	45.9699	0.36186		0.345774		100.329	85.9672	85.9672		0.082	0.729	17.866	45.9448	21.137	0.235	12.669	0.025	0.175				99.8486	0.633046	0.63303	1299.61		-5.82414	0.094697		6.35886	0.235374		1299.46	58.2103	1299.46	29.1051
	OIB data	Coogan et al. (2014 JP)	1a-EJH06-48-2s	Emeishan	40.4101	0.0506	0.005	0.083	13.511	0.204	46.5637	0.373596		0.343746		101.574	86.0001	86.0001		0.106	0.75	19.5939	43.7723	21.342	0.241	13.104	0.015	0.192				100.178	0.59978	0.599764	1277.28		-5.95902	0.0988142		6.45044	0.238661		1277.13	57.3593	1277.13	28.6797
	OIB data	Coogan et al. (2014 JP)	1a-EJH06-55s	Emeishan	40.5631	0.0682	0.005	0.106	9.71366	0.145	48.913	0.346212		0.39546		100.278	89.9754	89.9754		0.09	0.658	18.2832	48.0883	16.823	0.203	14.827	0.027	0.201				99.9031	0.63826	0.638245	1351.8		-5.59129	0.0733138		6.1546	0.225524		1351.65	59.5378	1351.65	29.7689
	OIB data	Coogan et al. (2014 JP)	1a-EJH06-71s	Emeishan	40.3367	0.0352	0.005	0.058	14.9137	0.221	45.6605	0.36186		0.313326		101.93	84.5134	84.5134		0.117	1.116	22.2811	39.9438	22.781	0.251	12.969	0.011	0.19				100.835	0.545995	0.545979	1188.2		-6.45045	0.142045		6.8437	0.262745		1188.05	56.0987	1188.05	28.0494
	OIB data	Coogan et al. (2014 JP)	1a-EJH06-122s	Emeishan	39.7091	0.0462	0.005	0.074	14.1132	0.214	45.4759	0.3912		0.318396		100.375	85.1707	85.1707		0.073	0.969	18.5668	44.4742	21.656	0.247	12.564	0.021	0.178				99.7964	0.616401	0.616385	1265.83		-5.99615	0.108225		6.49843	0.242573		1265.68	57.4415	1265.68	28.7207
	OIB data	Coogan et al. (2014 JP)	1a-EJH06-139s	Emeishan	40.7299	0.0682	0.005	0.135	9.30595	0.134	49.1994	0.339366		0.455286		100.39	90.4063	90.4063		0.082	0.69	15.6016	50.4452	17	0.196	14.552	0.009	0.23				99.5633	0.684447	0.684432	1379.03		-5.43268	0.0733138		6.05315	0.223341		1378.88	60.9544	1378.88	30.4772
	OIB data	Coogan et al. (2014 JP)	1a-EJH06-143s	Emeishan	40.3913	0.0891	0.005	0.142	8.08778	0.129	49.9938	0.40098		0.432978		99.6942	91.6791	91.6791		0.172	0.648	16.5126	49.5778	15.732	0.207	15.532	0.098	0.212				99.3864	0.668229	0.668214	1436.41		-5.22212	0.0561167		5.84994	0.21598		1436.27	63.1118	1436.27	31.5559
	OIB data	Coogan et al. (2014 JP)	13EJH08-2	Emeishan	40.567	0.068	0.005	0.0211328	11.6975	0.18711	47.9691	0.397		0.29647		101.332	87.9681	87.9654		0.109	0.796	17.046	48.1511	19.6753	0.194	12.9217	0.013	0.144				99.8173	0.654572	0.654557	1363.98		-5.52416	0.0735294		6.1088	0.224631		1363.83	60.1946	1363.83	30.0973
	OIB data	Coogan et al. (2014 JP)	13EJH08-43	Emeishan	39.342	0.099	0.005	0.0199286	10.974	0.17325	46.4771	0.478		0.341848		97.9712	88.3053	88.3027		0.765	0.767	19.7851	40.6332	18.7447	0.187	13.5465	0.057	0.199				95.533	0.579427	0.579411	1439.58		-5.29756	0.0505051		5.83911	0.215539		1439.44	63.2168	1439.44	31.6084
	OIB data	Coogan et al. (2014 JP)	13EJH08-57	Emeishan	39.2703	0.075	0.005	0.0229525	13.6795	0.2079	45.2644	0.365		0.324705		99.3008	85.506	85.5029		0.002	0.817	18.2834	45.2079	21.4909	0.219	12.0318	0.026	0.172				99.2532	0.623879	0.623863	1378.08		-5.49626	0.0666667		6.05664	0.222307		1377.93	60.6023	1377.93	30.3011
	OIB data	Coogan et al. (2014 JP)	13EJH08-59	Emeishan	40.2075	0.051	0.005	0.0212962	12.458	0.20097	46.8383	0.634		0.30857		100.843	87.0182	87.0154		0.067	0.975	28.6571	31.3874	21.7434	0.195	14.6388	0.031	0.239				98.948	0.423547	0.423531	1235.61		-6.33133	0.0980392		6.62861	0.243645		1235.46	55.4515	1235.46	27.7258
	OIB data	Coogan et al. (2014 JP)	13EJH08-63	Emeishan	40.0651	0.043	0.005	0.0198632	11.9425	0.18513	47.2167	0.418		0.336806		100.313	87.576	87.5733		0.205	1	17.7105	43.2186	22.369	0.224	12.4289	0.038	0.19				98.326	0.620784	0.620768	1259.72		-6.02071	0.116279		6.52434	0.245949		1259.57	57.7793	1259.57	28.8897
	OIB data	Coogan et al. (2014 JP)	7EJH08-33a	Emeishan	39.6531	0.038	0.005	0.0243604	16.036	0.23661	44.4995	0.338		0.304537		101.23	83.1861	83.1826		0	1.342	20.0089	41.4555	24.1243	0.227	11.5962	0.012	0.189				100.139	0.581567	0.581551	1217.31		-6.26635	0.131579		6.71	0.25562		1217.16	56.7739	1217.16	28.387
	OIB data	Coogan et al. (2014 JP)	7EJH08-33b	Emeishan	39.6361	0.039	0.005	0.0233478	16.0475	0.23562	44.4871	0.341		0.304537		101.256	83.1721	83.1687		0.021	1.287	20.5916	40.2462	24.6154	0.228	11.1012	0.015	0.191				99.4809	0.567313	0.567297	1219.57		-6.26908	0.128205		6.69985	0.254219		1219.42	56.6341	1219.42	28.317
	OIB data	Coogan et al. (2014 JP)	7EJH08-39	Emeishan	40.431	0.042	0.005	0.0214348	12.332	0.18909	47.4099	0.389		0.326722		101.214	87.268	87.2652		0	0.93	20.5926	43.1502	20.2227	0.204	13.2484	0.014	0.192				99.3859	0.584317	0.584301	1231.11		-6.19502	0.119048		6.64845	0.249529		1230.96	56.4521	1230.96	28.2261
	OIB data	Coogan et al. (2014 JP)	7EJH08-44	Emeishan	39.7772	0.034	0.005	0.0210484	15.4105	0.21879	44.8812	0.444		0.312604		101.234	83.8512	83.8478		0.078	1.131	12.7194	48.1782	25.934	0.239	9.845	0.012	0.158				99.4006	0.717591	0.717578	1259.88		-5.92452	0.147059		6.52364	0.257942		1259.74	60.6099	1259.74	30.3049
	OIB data	Coogan et al. (2014 JP)	7EJH08-48	Emeishan	40.2019	0.069	0.005	0.0220301	13.609	0.2079	46.5278	0.471		0.310587		101.512	85.9065	85.9035		0.082	1.099	23.0724	37.7885	22.6888	0.218	12.8414	0.023	0.207				99.115	0.523516	0.5235	1326.64		-5.81229	0.0724638		6.25139	0.228232		1326.49	58.4014	1326.49	29.2007
	OIB data	Coogan et al. (2014 JP)	7EJH08-50	Emeishan	39.8496	0.045	0.005	0.0228283	14.7015	0.21582	45.4526	0.361		0.320671		101.105	84.644	84.6408		0.004	1.369	20.141	41.0775	23.558	0.235	11.3751	0.042	0.185				99.0082	0.577731	0.577715	1251.19		-6.10385	0.111111		6.56086	0.245113		1251.04	56.9436	1251.04	28.4718
	OIB data	Coogan et al. (2014 JP)	7EJH08-54	Emeishan	40.4823	0.041	0.005	0.0178198	11.982	0.16929	47.9078	0.404		0.337814		101.467	87.6976	87.695		0.018	0.886	19.0229	45.614	19.6614	0.183	13.1923	0.028	0.174				99.6259	0.616646	0.61663	1235.86		-6.13983	0.121951		6.62753	0.249948		1235.71	56.9046	1235.71	28.4523
	OIB data	Coogan et al. (2014 JP)	7EJH08-68	Emeishan	40.3329	0.037	0.005	0.0205945	14.005	0.21186	46.264	0.425		0.311596		101.71	85.4853	85.4822		0.059	1.159	23.0754	38.4047	22.8235	0.199	12.4861	0.01	0.212				99.4783	0.527517	0.527501	1194.55		-6.4356	0.135135		6.81405	0.259495		1194.41	55.888	1194.41	27.944
	OIB data	Coogan et al. (2014 JP)	7EJH08-72a	Emeishan	40.1258	0.045	0.005	0.0224387	12.3285	0.19107	47.0901	0.384		0.324705		100.61	87.1957	87.193		0.044	0.954	20.6922	42.5913	20.5148	0.203	12.8953	0.004	0.177				98.9221	0.579972	0.579956	1245.13		-6.13085	0.111111		6.58705	0.245543		1244.98	56.5907	1244.98	28.2954
	OIB data	Coogan et al. (2014 JP)	7EJH08-72b	Emeishan	40.6162	0.043	0.005	0.0204722	12.298	0.19008	47.8514	0.384		0.324705		101.79	87.401	87.3983		0.01	0.929	21.0166	42.1802	20.3386	0.192	13.1758	0.025	0.188				98.9143	0.573808	0.573792	1233.85		-6.19187	0.116279		6.63634	0.248382		1233.71	56.398	1233.71	28.199
	OIB data	Coogan et al. (2014 JP)	7EJH08-72c	Emeishan	40.2032	0.042	0.005	0.0215069	12.2665	0.18909	47.2648	0.385		0.322688		100.754	87.2931	87.2903		0.001	0.942	21.2286	41.2926	20.6524	0.203	12.9448	0.032	0.19				98.3577	0.566135	0.566119	1228.57		-6.22543	0.119048		6.65966	0.249925		1228.43	56.3514	1228.43	28.1757
	OIB data	Coogan et al. (2014 JP)	7EJH08-72d	Emeishan	40.0967	0.045	0.005	0.0224271	12.339	0.19206	47.2006	0.386		0.328738		100.683	87.2124	87.2096		0.008	0.956	21.3558	41.3097	20.788	0.203	12.859	0.035	0.194				98.5708	0.564769	0.564753	1241.71		-6.16241	0.111111		6.60193	0.245971		1241.56	56.4342	1241.56	28.2171
	OIB data	Coogan et al. (2014 JP)	7EJH08-77	Emeishan	39.7304	0.044	0.005	0.0219912	14.5535	0.21582	45.3318	0.367		0.317646		100.65	84.7407	84.7375		0.059	1.207	19.3828	41.4253	23.6798	0.214	11.2827	0.031	0.181				98.604	0.589106	0.58909	1252.17		-6.08795	0.113636		6.55665	0.245846		1252.02	57.1873	1252.02	28.5936
	OIB data	Coogan et al. (2014 JP)	7EJH08-88a	Emeishan	40.1989	0.067	0.005	0.0219783	12.747	0.19998	46.9864	0.434		0.310587		101.047	86.7931	86.7903		0.057	0.925	26.9513	35.176	20.5237	0.186	13.9238	0.028	0.217				98.9761	0.466823	0.466807	1297.58		-5.9971	0.0746269		6.36705	0.23153		1297.44	57.1124	1297.44	28.5562
	OIB data	Coogan et al. (2014 JP)	7EJH08-88b	Emeishan	40.1033	0.074	0.005	0.0209635	12.7605	0.19998	46.9262	0.442		0.314621		100.912	86.7663	86.7634		0.041	0.865	27.2097	34.4321	20.4197	0.199	14.1097	0.024	0.227				98.5524	0.459137	0.459121	1319.43		-5.90726	0.0675676		6.27968	0.228291		1319.29	57.8915	1319.29	28.9458
	OIB data	Coogan et al. (2014 JP)	7EJH08-97	Emeishan	40.754	0.043	0.005	0.0187118	10.262	0.15345	49.2319	0.384		0.282352		101.253	89.5325	89.5301		0.065	0.745	17.2156	48.4888	17.8824	0.188	13.5828	0.016	0.145				98.9499	0.653913	0.653898	1258.81		-5.99237	0.116279		6.5282	0.245675		1258.67	57.6467	1258.67	28.8234
	OIB data	Coogan et al. (2014 JP)	7EJH08-98	Emeishan	40.0076	0.042	0.005	0.0221825	14.3795	0.21879	45.7878	0.371		0.318654		101.218	85.0235	85.0203		0.063	1.016	21.0452	40.2562	22.7779	0.217	11.8602	0.034	0.194				98.5167	0.562019	0.562003	1231.15		-6.21676	0.119048		6.64824	0.249772		1231.01	56.5107	1231.01	28.2554
	OIB data	Coogan et al. (2014 JP)	7EJH08-105a	Emeishan	40.2931	0.04	0.005	0.021635	12.15	0.1881	47.6309	0.389		0.326722		101.107	87.4833	87.4806		0.03	0.947	20.4181	43.5392	19.9633	0.201	13.2583	0.016	0.193				99.3636	0.588558	0.588542	1222.14		-6.2353	0.125		6.68833	0.252499		1221.99	56.4448	1221.99	28.2224
	OIB data	Coogan et al. (2014 JP)	7EJH08-105b	Emeishan	40.6193	0.042	0.005	0.0214596	12.3095	0.19206	47.7501	0.382		0.323696		101.712	87.3674	87.3646		0.044	0.915	21.1753	42.5763	20.1564	0.189	13.2418	0.015	0.19				99.3453	0.574253	0.574237	1227.46		-6.22292	0.119048		6.66459	0.24992		1227.32	56.267	1227.32	28.1335
	OIB data	Coogan et al. (2014 JP)	7EJH08-115	Emeishan	40.1287	0.062	0.005	0.0216979	13.911	0.21186	46.32	0.415		0.311596		101.47	85.5836	85.5805		0.034	0.998	21.9454	39.7979	23.0828	0.2	12.826	0.011	0.193				100.142	0.548849	0.548833	1308.07		-5.86918	0.0806452		6.32482	0.231438		1307.92	57.8545	1307.92	28.9273
	OIB data	Coogan et al. (2014 JP)	7EJH08-124a	Emeishan	41.1962	0.053	0.005	0.0170059	8.1765	0.13266	50.7792	0.378		0.3842		101.227	91.7166	91.7147		0.063	0.667	18.6246	48.528	14.5174	0.162	15.3714	0.017	0.187				98.6715	0.636088	0.636073	1290.61		-5.86194	0.0943396		6.39545	0.235859		1290.46	57.6647	1290.46	28.8324
	OIB data	Coogan et al. (2014 JP)	7EJH08-124b	Emeishan	40.7752	0.066	0.005	0.0164993	8.637	0.13662	50.0749	0.376		0.377142		100.591	91.179	91.177		0.041	0.676	19.0968	48.4064	14.5669	0.159	15.2768	0.005	0.198				98.9393	0.629687	0.629672	1335.88		-5.66762	0.0757576		6.21549	0.227313		1335.73	58.8401	1335.73	29.4201
	OIB data	Coogan et al. (2014 JP)	S1_30	Skye	40.7353	0.1067	0.0037	0.1201	8.6568	0.1422	50.8524	0.3112		0.3962		101.34	91.2784	91.282		0.1389	0.3023	25.0148	43.4003	13.9861	0.1856	16.5005	0.0092	0.2662				99.8213	0.537873	0.537852	1408.92		-5.4572	0.0346767		5.94557	0.215313		1408.77	60.9091	1408.77	30.4546
	OIB data	Coogan et al. (2014 JP)	S1_33	Skye	41.1567	0.1236	0.0037	0.1388	8.4438	0.1313	50.1366	0.3192		0.3993		101.34	91.3635	91.3671		0.14	0.3503	28.8939	39.3994	14.1229	0.1448	17.1807	0.0189	0.2921				100.585	0.47774	0.47772	1424.83		-5.45434	0.0299353		5.88984	0.214431		1424.69	61.813	1424.69	30.9065
	OIB data	Coogan et al. (2014 JP)	S1_35	Skye	40.5296	0.1285	0.0037	0.1464	8.4407	0.1301	50.4773	0.3067		0.3944		100.549	91.4197	91.4232		0.1673	0.4088	25.8562	42.1227	13.9119	0.158	16.8253	0.0043	0.2507				99.7314	0.52219	0.52217	1452.73		-5.30438	0.0287938		5.79462	0.212133		1452.59	63.1769	1452.59	31.5884
	OIB data	Coogan et al. (2014 JP)	S1_38	Skye	40.7159	0.1146	0.0038	0.1212	8.446	0.1188	50.4875	0.3111		0.421		100.763	91.4164	91.4199		0.1676	0.2741	27.027	41.3664	13.3696	0.1651	17.1638	0.0073	0.2629				99.8499	0.506603	0.506583	1415.25		-5.46314	0.0331588		5.92326	0.215074		1415.11	61.3009	1415.11	30.6504
	OIB data	Coogan et al. (2014 JP)	S1_18	Skye	40.5782	0.1129	0.0073		8.6615	0.1602	50.8042	0.3138		0.3766		101.007	91.2666	91.2701		0.1698	0.3606	26.2335	41.9764	13.4817	0.1643	16.7497	0.0054	0.2393				99.4356	0.517706	0.517685	1416.26		-5.44829	0.064659		5.91975	0.220581		1416.11	62.9449	1416.11	31.4725
	OIB data	Coogan et al. (2014 JP)	S2_4	Skye	40.9853	0.1366	0.0038	0.1214	8.7049	0.1261	50.0712	0.3198		0.4019		100.885	91.1096	91.1132		0.1823	0.5091	25.6065	42.2564	14.175	0.159	16.741	0.0076	0.2554				99.9338	0.525401	0.525381	1471		-5.23354	0.0278184		5.73393	0.21094		1470.86	64.1587	1470.86	32.0793
	OIB data	Coogan et al. (2014 JP)	S2_6	Skye	41.0099	0.1038	0.0038	0.1044	8.1912	0.1331	50.1851	0.3107		0.391		100.44	91.6076	91.6111		0.3113	0.3514	30.831	36.3186	14.2166	0.1358	17.6499	0.01	0.2769				100.146	0.441418	0.441398	1373.75		-5.69381	0.0366089		6.07254	0.218963		1373.61	59.3785	1373.61	29.6893
	OIB data	Coogan et al. (2014 JP)	S3_25	Skye	40.4137	0.1519	0.0038	0.1118	8.9619	0.1441	49.6084	0.2974		0.3826		100.088	90.7938	90.7975		0.1898	0.2626	31.1096	36.5652	13.9539	0.149	17.01	0.0035	0.304				99.5992	0.440869	0.440848	1469.58		-5.32205	0.0250165		5.73859	0.211683		1469.44	64.2799	1469.44	32.1399
	OIB data	Coogan et al. (2014 JP)	S3_27	Skye	40.291	0.1138	0.0038	0.1333	8.0348	0.1314	50.611	0.3112		0.4061		100.048	91.8184	91.8217		0.1417	0.288	25.7706	43.014	13.5927	0.149	16.6262	0.0061	0.2603				99.8687	0.528238	0.528218	1420.2		-5.42255	0.0333919		5.90597	0.214557		1420.05	61.512	1420.05	30.756
	OIB data	Coogan et al. (2014 JP)	S3_29	Skye	40.677	0.1368	0.0036	0.1872	8.2289	0.119	49.7237	0.3098		0.4118		100.048	91.5007	91.5042		0.1699	0.2594	24.8921	44.2046	13.7565	0.1532	16.5714	0.0021	0.2702				100.318	0.543654	0.543633	1474.22		-5.20379	0.0263158		5.72337	0.21041		1474.07	64.2337	1474.07	32.1168
	OIB data	Coogan et al. (2014 JP)	S3_31	Skye	40.8591	0.1112	0.0038	0.1331	8.3527	0.1203	50.1671	0.3111		0.4228		100.494	91.4535	91.457		0.1705	0.3286	26.852	41.1303	13.6951	0.1826	16.7405	0.0129	0.2882				99.4358	0.506796	0.506776	1409.19		-5.48677	0.0341727		5.94462	0.215578		1409.04	61.0037	1409.04	30.5019
	OIB data	Coogan et al. (2014 JP)	S3_33	Skye	40.1286	0.0958	0.0036	0.1279	8.4398	0.1288	50.481	0.3077		0.4127		100.139	91.4211	91.4246		0.1827	0.3192	27.1584	41.0649	14.1365	0.1584	16.6542	0.0047	0.2587				99.9572	0.503562	0.503542	1370.2		-5.64718	0.0375783		6.08565	0.218588		1370.06	59.0218	1370.06	29.5109
	OIB data	Coogan et al. (2014 JP)	S5_33	Skye	40.7954	0.1208	0.0037	0.1369	8.2201	0.1295	50.2917	0.3092		0.389		100.413	91.5969	91.6003		0.1764	0.4016	25.6242	43.0459	13.4762	0.1415	16.9327	0.0033	0.2595				100.091	0.529842	0.529822	1436.77		-5.35716	0.0306291		5.84873	0.213201		1436.62	62.3256	1436.62	31.1628
	OIB data	Coogan et al. (2014 JP)	S5_7	Skye	40.9697	0.111	0.0037	0.1247	8.3866	0.1491	50.9545	0.3065		0.4081		100.423	91.5431	91.5466		0.1756	0.3331	27.0294	39.783	13.7334	0.1439	16.9431	0.0038	0.2694				98.4582	0.496824	0.496804	1409.55		-5.49515	0.0333333		5.94332	0.215563		1409.41	61.026	1409.41	30.513
	OIB data	Coogan et al. (2014 JP)	S5_44	Skye	39.9971	0.1002	0.0038	0.1457	8.0361	0.1223	49.8745	0.2958		0.3762		98.9639	91.7063	91.7097		0.1744	0.4055	25.2566	43.5977	13.2501	0.1519	16.8493	0.0056	0.251				99.9719	0.536609	0.536589	1391.04		-5.52967	0.0379242		6.00946	0.216897		1390.89	60.0596	1390.89	30.0298
	OIB data	Coogan et al. (2014 JP)	S5_46	Skye	40.4351	0.1217	0.0037	0.1047	10.0514	0.1446	48.3803	0.3191		0.3456		99.92	89.5567	89.5609		0.1506	0.3227	26.7321	39.5268	16.0146	0.1849	15.9674	0.0084	0.2362				99.1541	0.497974	0.497953	1435.85		-5.39206	0.0304026		5.85187	0.213583		1435.71	62.3702	1435.71	31.1851
	OIB data	Coogan et al. (2014 JP)	S5_40	Skye	40	0.1201	0.0037	0.189	8.24	0.1175	50.2413	0.3072		0.3905		99.62	91.57	91.5739		0.1757	0.4042	26.4129	42.4569	13.0805	0.1468	16.9928	0.0039	0.2689				99.6	0.51884	0.518825	1430		-5.39328	0.0308077		5.87142	0.213741		1430.02	62.0014	1430.02	31.0007
	OIB data	Coogan et al. (2014 JP)	S6_6	Skye	41.0466	0.1191	0.0056	0.1495	7.933	0.1225	50.4317	0.3066		0.3949		100.529	91.8872	91.8906		0.1759	0.3787	25.5834	42.76	13.3008	0.1654	17.1178	0.0402	0.2455				99.8019	0.528579	0.528559	1433.8		-5.36974	0.0470193		5.8589	0.215779		1433.66	62.8605	1433.66	31.4302
	OIB data	Coogan et al. (2014 JP)	S7_5	Skye	40.3551	0.1037	0.0057	0.1046	9.9711	0.1531	49.3581	0.3131		0.3686		100.757	89.816	89.8201		0.1388	0.3786	28.3943	38.1123	15.4929	0.1756	16.4907	0.0152	0.2683				99.4949	0.473807	0.473786	1385.87		-5.61244	0.0549662		6.02819	0.220856		1385.72	60.7764	1385.72	30.3882
	OIB data	Coogan et al. (2014 JP)	S7_13	Skye	40.0228	0.0943	0.0056	0.1189	10.0084	0.1356	49.421	0.3184		0.3639		100.482	89.7935	89.7976		0.1492	0.3302	28.7584	37.2416	15.9769	0.1609	16.4225	0.001	0.2544				99.3471	0.464878	0.464857	1361.8		-5.7202	0.0593849		6.11696	0.223454		1361.65	59.7196	1361.65	29.8598
	OIB data	Coogan et al. (2014 JP)	S8_1	Skye	40.5961	0.1024	0.0071		8.7527	0.1372	49.8367	0.3133		0.3646		100.103	91.0269	91.0305		0.1587	0.4955	28.4678	39.2311	15.1408	0.1739	16.9546	0.0063	0.2658				100.916	0.48038	0.480359	1380.53		-5.62764	0.0693359		6.04763	0.22435		1380.39	61.3415	1380.39	30.6708
	OIB data	Coogan et al. (2014 JP)	S8_26	Skye	40.7279	0.0938	0.0037	0.103	9.3185	0.1455	50.1132	0.3156		0.3835		101.225	90.5494	90.5532		0.1398	0.4509	28.532	38.3713	15.3124	0.1884	16.7467	0.0068	0.2617				100.046	0.474289	0.474269	1360.19		-5.71762	0.0394456		6.12296	0.219872		1360.05	58.6473	1360.05	29.3237
	OIB data	Coogan et al. (2014 JP)	S8_29	Skye	40.6161	0.1016	0.0037	0.1162	9.0029	0.1584	50.2335	0.3164		0.4046		100.961	90.8601	90.8638		0.1441	0.3216	27.7028	39.4117	15.9784	0.1766	16.2047	0.0049	0.2509				100.252	0.48833	0.488309	1383.38		-5.60825	0.0364173		6.03726	0.217738		1383.23	59.7384	1383.23	29.8692
	OIB data	Coogan et al. (2014 JP)	S8_31	Skye	41.2069	0.0794	0.0037	0.117	8.8889	0.1382	50.5496	0.3058		0.4054		101.707	91.0168	91.0204		0.1589	0.4608	25.6269	40.5206	16.2206	0.1933	15.6754	0.0327	0.2885				99.1944	0.514733	0.514713	1336.81		-5.7769	0.0465995		6.21188	0.222124		1336.67	57.5636	1336.67	28.7818
	OIB data	Coogan et al. (2014 JP)	S8_38	Skye	40.4586	0.1256	0.0038	0.1073	9.3962	0.1432	50.0786	0.3171		0.3663		101.016	90.4721	90.476		0.152	0.3706	28.8745	38.0983	15.2149	0.1532	16.9389	0.0056	0.2629				100.105	0.469536	0.469516	1431.27		-5.43761	0.0302548		5.86759	0.214168		1431.13	62.2064	1431.13	31.1032
	OIB data	Coogan et al. (2014 JP)	S9_1	Skye	40.7147	0.0919	0.0038	0.1177	8.1156	0.1236	50.0104	0.302		0.398		99.897	91.652	91.6554		0.2212	0.3433	32.1241	34.7738	13.4784	0.1346	17.9191	0.0037	0.3086				99.3499	0.420685	0.420665	1339.82		-5.85666	0.0413493		6.20029	0.222227		1339.68	57.8058	1339.68	28.9029
	OIB data	Coogan et al. (2014 JP)	S9_6	Skye	40.7382	0.1035	0.0038	0.1337	7.9977	0.1366	50.2945	0.3032		0.3931		100.116	91.806	91.8094		0.2147	0.399	24.4779	43.29	13.573	0.1649	16.7309	0.0168	0.2491				99.1499	0.54263	0.542609	1405.52		-5.46595	0.036715		5.95763	0.215745		1405.37	60.7847	1405.37	30.3923
	OIB data	Coogan et al. (2014 JP)	S9_19	Skye	40.39	0.1151	0.0038	0.1384	7.7355	0.1274	50.2065	0.3058		0.4069		99.4619	92.0405	92.0437		0.2363	0.3345	24.6737	43.2788	13.6216	0.1489	16.7415	0.0125	0.2583				99.3298	0.540587	0.540567	1431.25		-5.36769	0.0330148		5.86768	0.213703		1431.1	62.0694	1431.1	31.0347
	OIB data	Coogan et al. (2014 JP)	S10_20	Skye	40.7508	0.1022	0.0038	0.1322	8.1665	0.1265	50.7128	0.3019		0.4118		100.721	91.7107	91.7141		0.1917	0.3705	23.2901	44.9179	13.6677	0.1765	16.4011	0.0051	0.2558				99.3031	0.564044	0.564024	1409.57		-5.42885	0.037182		5.94328	0.215325		1409.42	60.9597	1409.42	30.4798
	OIB data	Coogan et al. (2014 JP)	S10_22	Skye	40.387	0.1159	0.0038	0.145	8.2693	0.1177	49.9829	0.2977		0.4063		99.74	91.503	91.5065		0.1753	0.3945	23.9234	44.0376	13.3318	0.156	16.6021	0.0048	0.2512				98.9089	0.552547	0.552527	1438.05		-5.32988	0.0327869		5.84434	0.213139		1437.91	62.401	1437.91	31.2005
	OIB data	Coogan et al. (2014 JP)	S10_25	Skye	40.6905	0.1261	0.0037	0.1417	8.3413	0.1303	49.8967	0.2862		0.4023		100.035	91.4219	91.4254		0.1908	0.3586	24.0794	43.9029	13.8827	0.1734	16.4437	0.006	0.2341				99.3223	0.550182	0.550162	1459.37		-5.25204	0.0293418		5.77242	0.21151		1459.23	63.4767	1459.23	31.7383
	OIB data	Coogan et al. (2014 JP)	S10_28	Skye	40.8299	0.0849	0.0038	0.1392	7.6815	0.13	50.2614	0.2973		0.3885		99.831	92.0996	92.1028		0.2328	0.3533	26.4027	41.0014	13.4426	0.1517	17.0477	0.0041	0.2566				98.9142	0.510229	0.510209	1346.54		-5.73975	0.0447585		6.17458	0.221196		1346.39	58.018	1346.39	29.009
	OIB data	Coogan et al. (2014 JP)	S10_31	Skye	40.6036	0.1276	0.0038	0.1451	7.2017	0.1213	50.7369	0.2993		0.4403		99.6917	92.6209	92.624		0.1917	0.1845	24.2133	43.8641	12.4925	0.1586	17.1569	0.0041	0.2573				98.5518	0.54859	0.54857	1461.49		-5.24576	0.0297806		5.76538	0.211454		1461.34	63.615	1461.34	31.8075
	OIB data	Coogan et al. (2014 JP)	S10_33	Skye	40.2668	0.1037	0.0038	0.145	8.1262	0.1238	50.0991	0.305		0.3986		99.5868	91.6556	91.659		0.1874	0.4026	23.9257	44.517	13.3464	0.1588	16.6588	0.0256	0.2702				99.5151	0.555199	0.555179	1408.65		-5.44121	0.0366442		5.94654	0.215403		1408.5	60.9149	1408.5	30.4574
	OIB data	Coogan et al. (2014 JP)	S10_35	Skye	40.869	0.1034	0.0038	0.1405	7.5525	0.121	50.6496	0.2986		0.413		100.169	92.277	92.2801		0.1566	0.3651	24.2231	44.3718	13.6894	0.1722	16.5938	0.0059	0.2538				99.8716	0.551338	0.551318	1405.75		-5.45646	0.0367505		5.95681	0.21564		1405.6	60.7719	1405.6	30.386
	OIB data	Coogan et al. (2014 JP)	S10_37	Skye	40.7426	0.1099	0.0037	0.1383	7.3522	0.1106	50.7548	0.2914		0.4075		99.9248	92.4808	92.4839		0.1696	0.376	24.0417	44.3882	13.1855	0.1618	16.6739	0.0052	0.2675				99.2843	0.553288	0.553268	1422.74		-5.38797	0.033667		5.8971	0.214163		1422.6	61.584	1422.6	30.792
	OIB data	Coogan et al. (2014 JP)	S10_39	Skye	40.677	0.1076	0.0038	0.1146	7.9421	0.1352	50.237	0.2914		0.4386		99.96	91.8498	91.8531		0.2044	0.4155	33.2025	34.6375	13.0056	0.1367	17.8524	0.0045	0.3167				99.8192	0.411709	0.411689	1371.6		-5.73196	0.035316		6.0805	0.219307		1371.45	59.3162	1371.45	29.6581
	OIB data	Coogan et al. (2014 JP)	R10_6	Rum	40.5542	0.0819	0.0056	0.0788	11.0215	0.1729	48.0253	0.4116		0.3534		100.748	88.5888	88.5934		0.1198	0.72	26.6093	32.3922	30.119	0.3147	9.6582	0.0247	0.2017				100.368	0.449532	0.449512	1350.32		-5.78352	0.0683761		6.16018	0.226462		1350.18	59.6772	1350.18	29.8386
	OIB data	Coogan et al. (2014 JP)	M9_1	Rum	41.4863	0.1093	0.0037	0.1464	7.718	0.1067	50.8458	0.287		0.4549		101.173	92.1491	92.1523		0.1056	0.6211	21.8125	44.9764	18.0504	0.2177	14.7946	0.0105	0.234				100.863	0.580405	0.580385	1439.7		-5.29614	0.0338518		5.8387	0.212884		1439.56	62.4469	1439.56	31.2234
	OIB data	Coogan et al. (2014 JP)	M9_3	Rum	41.6651	0.1199	0.0037	0.1294	7.7489	0.1189	50.4941	0.2642		0.4821		101.039	92.0696	92.0729		0.1391	0.6194	22.5889	44.3541	17.1997	0.212	15.0907	0.0121	0.2396				100.538	0.56845	0.56843	1458.15		-5.23856	0.030859		5.77648	0.211564		1458.01	63.4038	1458.01	31.7019
	OIB data	Coogan et al. (2014 JP)	M9_5	Rum	41.3882	0.12	0.0037	0.1328	7.2317	0.1049	50.8964	0.2814		0.47		100.644	92.614	92.617		0.1638	0.5352	23.5883	42.6998	18.1391	0.2269	14.3284	0.0171	0.2084				99.9422	0.548404	0.548384	1452.07		-5.28101	0.0308333		5.79684	0.212122		1451.93	63.1252	1451.93	31.5626
	OIB data	Coogan et al. (2014 JP)	M9_9	Rum	40.8183	0.1165	0.0037	0.1371	9.1769	0.1214	49.4658	0.2935		0.3606		100.497	90.5691	90.573		0.1099	0.7066	20.3601	42.6704	23.835	0.3768	11.872	0.0095	0.1784				100.266	0.584363	0.584343	1474.28		-5.16344	0.0317597		5.72317	0.210595		1474.13	64.2946	1474.13	32.1473
	OIB data	Coogan et al. (2014 JP)	M9_13	Rum	41.3652	0.1332	0.0036	0.1351	7.6925	0.1064	50.9109	0.3162		0.4637		101.136	92.1822	92.1854		0.1126	0.5403	21.5853	43.457	20.2401	0.2551	13.1327	0.0309	0.1771				99.5678	0.574575	0.574555	1497.92		-5.08792	0.027027		5.64677	0.208857		1497.77	65.5013	1497.77	32.7507
	OIB data	Coogan et al. (2014 JP)	M9_15	Rum	41.2849	0.1104	0.0037	0.1438	7.5652	0.0977	51.0175	0.2774		0.4622		100.974	92.3165	92.3196		0.1966	0.5625	21.5608	43.8197	19.9156	0.2317	13.5233	0.017	0.2109				100.077	0.576883	0.576862	1446.33		-5.27452	0.0335145		5.81619	0.212487		1446.19	62.8139	1446.19	31.4069
	OIB data	Coogan et al. (2014 JP)	M9_17	Rum	40.1284	0.1177	0.0036	0.1274	7.9256	0.1124	49.5531	0.2447		0.4768		98.6984	91.7623	91.7657		0.1035	0.6251	21.4922	44.8964	18.4034	0.2211	14.5624	0.0111	0.2174				100.559	0.583571	0.583551	1462.56		-5.20731	0.0305862		5.76181	0.211125		1462.41	63.5949	1462.41	31.7974
	OIB data	Coogan et al. (2014 JP)	M9_21	Rum	40.5878	0.1169	0.0036	0.1515	7.5183	0.1236	50.5404	0.2774		0.4796		99.8077	92.2939	92.2971		0.153	0.5879	21.4125	44.4011	17.1751	0.2203	15.333	0.0053	0.2386				99.5622	0.581777	0.581757	1462.2		-5.21041	0.0307956		5.76301	0.211188		1462.05	63.5874	1462.05	31.7937
	OIB data	Coogan et al. (2014 JP)	M9_23	Rum	40.6198	0.1147	0.0037	0.148	7.6504	0.1128	50.9303	0.288		0.4466		100.321	92.2244	92.2276		0.1779	0.6132	22.3402	44.3116	17.3944	0.1986	15.1665	0.0094	0.2297				100.467	0.570929	0.570909	1448.61		-5.27182	0.0322581		5.80851	0.212259		1448.46	62.9126	1448.46	31.4563
	OIB data	Coogan et al. (2014 JP)	M9_25	Rum	39.5578	0.1251	0.0037	0.1466	7.7522	0.1148	50.7426	0.2783		0.4688		99.1969	92.1023	92.1055		0.2674	0.5634	21.4033	43.9825	19.2529	0.3127	13.8388	0.0186	0.2134				99.9323	0.579575	0.579555	1481.42		-5.14219	0.0295763		5.69987	0.209989		1481.28	64.6347	1481.28	32.3174
	OIB data	Coogan et al. (2014 JP)	MU1.1_1	Mull	40.7565	0.0981	0.0037	0.1199	7.8186	0.1132	51.1421	0.2796		0.4345		100.785	92.0973	92.1005		0.2199	0.3239	25.8786	43.9855	13.7607	0.166	16.2499	0.0034	0.236				100.845	0.532759	0.532739	1380.74		-5.57518	0.0377166		6.04688	0.217578		1380.59	59.5047	1380.59	29.7524
	OIB data	Coogan et al. (2014 JP)	MU1.1_9	Mull	40.8893	0.1013	0.0038	0.1202	7.5586	0.1309	51.1933	0.2523		0.4229		100.704	92.347	92.3502		0.2149	0.2934	24.4856	42.301	18.3458	0.2288	14.4525	0.0065	0.2111				100.604	0.53681	0.53679	1401.47		-5.48775	0.0375123		5.97204	0.216174		1401.32	60.6119	1401.32	30.306
	OIB data	Coogan et al. (2014 JP)	MU1.1_19	Mull	40.6189	0.0795	0.0038	0.1023	8.2845	0.1418	50.6382	0.2721		0.4341		100.592	91.5896	91.5931		0.236	0.3153	28.3085	38.7983	15.4784	0.1673	16.0297	0.006	0.2568				99.6517	0.479011	0.478991	1322.29		-5.87516	0.0477987		6.26845	0.223786		1322.14	56.9524	1322.14	28.4762
	OIB data	Coogan et al. (2014 JP)	MU1.1_24	Mull	41.0747	0.0776	0.0038	0.1217	7.5236	0.1106	50.5665	0.2564		0.4164		100.176	92.2926	92.2957		0.2158	0.3144	23.5072	40.1478	23.0036	0.2906	11.1548	0.018	0.1193				98.8829	0.533958	0.533938	1347.21		-5.71349	0.0489691		6.17201	0.221592		1347.07	58.1703	1347.07	29.0852
	OIB data	Coogan et al. (2014 JP)	MU1.1_27	Mull	40.4511	0.0951	0.0037	0.1334	7.7626	0.1211	50.5512	0.2844		0.4286		99.8583	92.0649	92.0682		0.2461	0.2587	25.1585	41.981	15.5786	0.1923	15.2143	0.0073	0.2259				98.9095	0.528171	0.528151	1381.15		-5.57802	0.0389064		6.04537	0.217771		1381.01	59.5873	1381.01	29.7937
	OIB data	Coogan et al. (2014 JP)	MU1.2_1	Mull	40.3877	0.0874	0.0038	0.1114	9.3864	0.1328	49.0323	0.2703		0.4209		99.8668	90.2977	90.3016		0.5953	0.3694	24.6106	42.5364	17.464	0.2368	14.2131	0.0279	0.2091				100.337	0.536924	0.536904	1363.9		-5.64044	0.0434783		6.10909	0.219504		1363.75	58.8151	1363.75	29.4076
	OIB data	Coogan et al. (2014 JP)	MU1.2_14	Mull	40.2705	0.0812	0.0037	0.09	9.8509	0.1425	48.7118	0.2692		0.3767		99.8287	89.8064	89.8105		0.1798	0.3197	22.9095	41.6123	22.7684	0.275	12.0003	0.019	0.1761				100.373	0.549246	0.549226	1360.52		-5.64239	0.0455665		6.12174	0.219932		1360.37	58.6866	1360.37	29.3433
	OIB data	Coogan et al. (2014 JP)	MU1.2_17	Mull	40.3455	0.0921	0.0038	0.094	9.463	0.1401	49.2445	0.3		0.4022		100.118	90.2643	90.2682		0.1508	0.3887	22.6214	41.1197	22.7398	0.2488	12.4887	0.006	0.1786				100.055	0.549431	0.549411	1394.34		-5.50378	0.0412595		5.99757	0.217035		1394.19	60.3363	1394.19	30.1682
	OIB data	Coogan et al. (2014 JP)	MU2.2_6	Mull	41.0118	0.0953	0.0037	0.1285	9.2798	0.1546	49.502	0.2811		0.43		100.901	90.4798	90.4836		0.1914	0.2909	25.85	42.1409	17.2409	0.2218	14.3104	0.0041	0.2149				100.53	0.522358	0.522337	1376.43		-5.60304	0.0388248		6.06267	0.218134		1376.29	59.3466	1376.29	29.6733
	OIB data	Coogan et al. (2014 JP)	MU2.2_19	Mull	40.5675	0.1133	0.0036	0.3159	6.7267	0.1118	51.0332	0.2691		0.4587		99.6258	93.1114	93.1142		0.522	0.2862	26.2038	42.5556	13.8144	0.2003	15.7574	0.0095	0.1999				99.6056	0.521409	0.521389	1416.52		-5.44362	0.0317741		5.91884	0.214662		1416.37	61.2748	1416.37	30.6374
	OIB data	Coogan et al. (2014 JP)	MU2.2_23	Mull	40.527	0.0968	0.0036	0.1269	7.599	0.1253	50.8081	0.284		0.4186		100.003	92.2555	92.2587		0.2152	0.3019	26.2668	43.3761	14.461	0.1637	15.89	0.0057	0.2235				100.956	0.525574	0.525553	1375.57		-5.60341	0.0371901		6.06585	0.217925		1375.42	59.2276	1375.42	29.6138
	OIB data	Coogan et al. (2014 JP)	MU3.1_1	Mull	40.9831	0.1188	0.0038	0.1156	7.681	0.1212	50.3238	0.2637		0.4263		100.059	92.1091	92.1123		0.2254	0.3103	25.6942	41.6101	17.0696	0.212	14.7241	0.0048	0.2276				100.154	0.520703	0.520683	1434.04		-5.37658	0.0319865		5.85807	0.213625		1433.9	62.2505	1433.9	31.1252
	OIB data	Coogan et al. (2014 JP)	MU3.1_8	Mull	40.5493	0.0951	0.0038	0.1052	9.9095	0.1559	49.0179	0.304		0.4151		100.569	89.8094	89.8135		0.2328	0.3413	26.7188	41.1244	15.246	0.2001	15.9707	0.0079	0.2417				100.136	0.508003	0.507983	1371.32		-5.63819	0.0399579		6.08152	0.218801		1371.18	59.1598	1371.18	29.5799
	OIB data	Coogan et al. (2014 JP)	MU3.1_13	Mull	40.8738	0.0953	0.0038	0.121	8.0438	0.1192	50.6546	0.2821		0.4293		100.62	91.8164	91.8198		0.2104	0.2775	22.535	41.1902	22.8482	0.2659	12.4539	0.0416	0.1534				100.068	0.550802	0.550782	1403.52		-5.4658	0.0398741		5.96471	0.216231		1403.38	60.7771	1403.38	30.3886
	OIB data	Coogan et al. (2014 JP)	PAD4_3	Baffin Island	40.5553	0.1023	0.0029	0.1592	7.2907	0.1079	50.577	0.2781		0.4577		99.5481	92.5147	92.5178		0.1233	0.356	21.3724	49.3241	14.4363	0.2055	14.7284	0.0273	0.207				100.874	0.607567	0.607547	1420.82		-5.34195	0.028348		5.9038	0.213092		1420.68	61.1371	1420.68	30.5686
	OIB data	Coogan et al. (2014 JP)	PAD4_5	Baffin Island	40.6678	0.0929	0.0029	0.1285	8.4644	0.1133	50.1402	0.2776		0.4626		100.365	91.3448	91.3484		0.0976	0.3907	22.3363	47.6066	15.9098	0.1851	11.3389	0.0114	0.2032				98.1745	0.588445	0.588425	1390.08		-5.48244	0.0312164		6.01292	0.215532		1389.94	59.613	1389.94	29.8065
	OIB data	Coogan et al. (2014 JP)	PAD5_5_2	Baffin Island	40.7753	0.0988	0.0029	0.1474	9.3514	0.1369	50.3689	0.2838		0.432		101.601	90.5628	90.5666		0.1284	0.35	20.0344	47.0109	17.7499	0.2175	13.5596	0.0237	0.1759				99.3191	0.611521	0.611502	1427.52		-5.31211	0.0293522		5.88053	0.212756		1427.38	61.5247	1427.38	30.7623
	OIB data	Coogan et al. (2014 JP)	PAD5_3	Baffin Island	40.5983	0.0949	0.0029	0.1378	7.7746	0.1126	50.7905	0.2873		0.4452		100.261	92.0881	92.0914		0.1533	0.6182	20.8991	49.0157	13.9175	0.1903	15.477	0.0156	0.239				100.572	0.611404	0.611384	1406.41		-5.39464	0.0305585		5.95445	0.214185		1406.27	60.4096	1406.27	30.2048
	OIB data	Coogan et al. (2014 JP)	PAD5_4	Baffin Island	40.7917	0.1005	0.0029	0.1397	7.9448	0.1032	50.9744	0.2862		0.4572		100.818	91.9557	91.959		0.1395	0.4768	21.0792	49.0621	13.1356	0.1818	15.676	0.0046	0.2345				100.044	0.609588	0.609569	1419.3		-5.34588	0.0288557		5.90912	0.213219		1419.15	61.0635	1419.15	30.5318
	OIB data	Coogan et al. (2014 JP)	PAD6_1	Baffin Island	40.1752	0.0924	0.0029	0.0963	9.5087	0.1517	49.1402	0.2929		0.4243		99.9027	90.2031	90.2071		0.101	0.5022	22.4049	44.9288	16.29	0.1868	14.9499	0.0122	0.2466				99.6735	0.573607	0.573587	1391.61		-5.49091	0.0313853		6.00739	0.215612		1391.47	59.745	1391.47	29.8725
	OIB data	Coogan et al. (2014 JP)	PAD6_6	Baffin Island	40.0464	0.1008	0.0029	0.1483	9.3964	0.122	50.4293	0.2823		0.4352		100.98	90.5319	90.5358		0.1664	0.2782	19.5526	49.7542	15.1012	0.1996	14.7394	0.0119	0.1986				100.072	0.630595	0.630576	1434.19		-5.26773	0.0287698		5.85758	0.212104		1434.04	61.8178	1434.04	30.9089
	OIB data	Coogan et al. (2014 JP)	PAD6_11	Baffin Island	39.4981	0.044	0.0029	0.0487	13.3509	0.1964	46.6192	0.3478		0.2913		100.134	86.1519	86.1572		0.1505	0.2449	19.8101	49.6648	14.7652	0.1924	14.7958	0.0137	0.2129				99.9159	0.627121	0.627102	1239.9		-6.10976	0.0659091		6.60981	0.231942		1239.75	53.0886	1239.75	26.5443
	OIB data	Coogan et al. (2014 JP)	PAD6_13	Baffin Island	39.6993	0.0927	0.0029	0.094	12.5912	0.1768	47.3104	0.3062		0.3532		100.634	87.0035	87.0085		0.1027	0.3615	19.5584	46.8366	19.4304	0.2251	13.094	0.0075	0.1753				99.8547	0.61634	0.616321	1416.07		-5.35179	0.0312837		5.92038	0.213623		1415.93	60.9465	1415.93	30.4732
	OIB data	Coogan et al. (2014 JP)	APO4_5	Baffin Island	39.5841	0.1074	0.0029	0.1113	11.7901	0.1692	47.8288	0.2811		0.3921		100.284	87.8457	87.8505		0.0767	0.3468	19.1931	45.7073	21.7617	0.2335	12.1033	0.0666	0.1732				99.741	0.615026	0.615007	1460.01		-5.18575	0.0270019		5.77028	0.210565		1459.87	63.24	1459.87	31.62
	OIB data	Coogan et al. (2014 JP)	APO4_6	Baffin Island	39.6628	0.1002	0.0029	0.1158	11.6627	0.1601	48.1103	0.2744		0.3906		100.491	88.0232	88.028		0.0903	0.3512	18.347	48.2913	20.2986	0.2306	12.4731	0.0302	0.1667				100.337	0.638433	0.638414	1447.34		-5.21005	0.0289421		5.81278	0.211275		1447.2	62.5288	1447.2	31.2644
	OIB data	Coogan et al. (2014 JP)	APO7_1	Baffin Island	40.9454	0.0959	0.0029	0.0778	7.2872	0.107	51.2034	0.282		0.4401		100.558	92.6028	92.6059		0.1927	0.4996	20.5328	49.0205	13.5825	0.1955	15.6058	0.0166	0.2354				99.9185	0.61562	0.6156	1412.51		-5.36647	0.0302398		5.93292	0.213728		1412.36	60.7192	1412.36	30.3596
	OIB data	Coogan et al. (2014 JP)	APO7_4	Baffin Island	40.6194	0.0992	0.0029	0.1397	7.3105	0.1047	51.3095	0.2819		0.4577		100.366	92.5951	92.5982		0.1879	0.444	20.073	50.1405	14.3157	0.2116	15.2879	0.0147	0.2108				100.887	0.626267	0.626248	1424.31		-5.30999	0.0292339		5.89167	0.212789		1424.16	61.3018	1424.16	30.6509
	OIB data	Coogan et al. (2014 JP)	DUR6_2	Baffin Island	39.6473	0.0917	0.0029	0.1716	7.6554	0.1104	51.1903	0.2873		0.4398		99.6128	92.2562	92.2594		0.1367	0.3871	21.682	47.8711	13.7269	0.1855	15.6784	0.017	0.2225				99.976	0.596959	0.59694	1392.15		-5.46572	0.0316249		6.00544	0.215358		1392.01	59.7132	1392.01	29.8566
	OIB data	Coogan et al. (2014 JP)	DUR6_5	Baffin Island	39.3652	0.0519	0.0029	0.0777	10.0739	0.1549	48.7706	0.3269		0.3895		99.2219	89.6108	89.615		0.0922	0.9497	17.1999	41.6427	31.1196	0.2931	8.9252	0.0117	0.1466				100.493	0.618929	0.61891	1307.35		-5.80334	0.0558767		6.32771	0.224752		1307.2	56.132	1307.2	28.066
	OIB data	Coogan et al. (2014 JP)	DUR6_7	Baffin Island	40.5942	0.0967	0.0029	0.1119	9.2884	0.1377	49.616	0.2778		0.4236		100.559	90.4916	90.4954		0.0928	0.4434	19.5559	47.7259	17.7328	0.2186	13.9552	0.0004	0.205				100.007	0.620808	0.620789	1425.85		-5.30942	0.0299897		5.88633	0.212835		1425.7	61.4264	1425.7	30.7132
	OIB data	Coogan et al. (2014 JP)	DUR8_2	Baffin Island	38.9418	0.0987	0.0029	0.1055	12.4644	0.1783	47.3129	0.3138		0.3304		99.7554	87.1181	87.1231		0.0897	0.2393	19.9662	47.6484	19.7603	0.2401	11.9531	0.0053	0.1587				100.121	0.615523	0.615504	1427.12		-5.30971	0.029382		5.88192	0.212743		1426.98	61.492	1426.98	30.746
	OIB data	Coogan et al. (2014 JP)	DUR8_5	Baffin Island	39.7112	0.0617	0.0029	0.0565	13.8982	0.2013	46.082	0.3228		0.316		100.66	85.5227	85.5282		0.0848	0.5736	22.8999	41.4028	22.1239	0.2473	12.4089	0.0075	0.1812				100.002	0.5481	0.54808	1297.67		-5.9166	0.0470016		6.3667	0.224624		1297.52	55.415	1297.52	27.7075
	OIB data	Coogan et al. (2014 JP)	DUR8_7	Baffin Island	40.1733	0.1071	0.0029	0.1511	9.9002	0.1409	49.2533	0.2855		0.4431		100.473	89.8617	89.8658		0.0929	0.3937	18.4712	50.5588	17.6474	0.2211	13.0866	0.0023	0.1917				100.747	0.647417	0.647399	1460.99		-5.15021	0.0270775		5.76703	0.210207		1460.84	63.2035	1460.84	31.6017
	OIB data	Coogan et al. (2014 JP)	138345_1	West Greenland	40.5475	0.0999	0.0029	0.1532	7.7521	0.1078	50.6817	0.2662		0.4347		100.063	92.0936	92.0969		0.1587	0.5509	19.1646	49.2218	15.9764	0.1887	14.3627	0.0062	0.1944				99.9245	0.632755	0.632736	1436.53		-5.25665	0.029029		5.84955	0.211973		1436.38	61.9491	1436.38	30.9745
	OIB data	Coogan et al. (2014 JP)	138345_6	West Greenland	40.4621	0.1063	0.0029	0.1623	7.1229	0.0909	51.1493	0.2653		0.4471		99.8781	92.7504	92.7534		0.1318	0.6009	19.4805	49.6216	15.1487	0.1946	14.9989	0.0045	0.2122				100.459	0.630834	0.630814	1449.11		-5.2109	0.0272813		5.80682	0.211068		1448.96	62.5958	1448.96	31.2979
	OIB data	Coogan et al. (2014 JP)	138345_10	West Greenland	38.8485	0.0949	0.0029	0.1056	12.9602	0.1851	46.4459	0.2627		0.4045		99.3401	86.4589	86.4641		0.0745	0.3377	14.3623	48.4967	25.6361	0.2696	9.9272	0.0202	0.1724				99.4066	0.693742	0.693724	1484.22		-5.01954	0.0305585		5.69078	0.208884		1484.08	64.5003	1484.08	32.2502
	OIB data	Coogan et al. (2014 JP)	340740_1	West Greenland	39.6536	0.0758	0.0029	0.0995	10.2591	0.1388	48.9673	0.2843		0.4517		99.9892	89.478	89.4822		0.1184	0.8142	20.4564	44.0115	18.6497	0.2051	14.6199	0.0195	0.263				99.2454	0.590719	0.590699	1361.37		-5.59795	0.0382586		6.11854	0.218295		1361.23	58.3106	1361.23	29.1553
	OIB data	Coogan et al. (2014 JP)	340740_3	West Greenland	40.3276	0.0921	0.0029	0.135	8.6971	0.1266	50.32	0.2799		0.4653		100.476	91.1569	91.1605		0.1728	0.8577	22.064	45.1372	15.718	0.1809	15.7168	0.0115	0.2798				100.206	0.578481	0.578461	1393.42		-5.47883	0.0314875		6.00087	0.215456		1393.28	59.8317	1393.28	29.9158
	OIB data	Coogan et al. (2014 JP)	340740_8	West Greenland	40.2094	0.0697	0.0029	0.1079	9.5196	0.1421	49.7896	0.2793		0.4811		100.629	90.3085	90.3125		0.1259	0.5848	17.2473	48.3941	18.2724	0.2116	14.0916	0.0338	0.2422				99.2855	0.653057	0.653039	1367.46		-5.51121	0.0416069		6.09584	0.217736		1367.31	58.5952	1367.31	29.2976
	OIB data	Coogan et al. (2014 JP)	340740_11	West Greenland	40.1686	0.0925	0.0029	0.1207	8.0623	0.1282	50.9166	0.2768		0.4913		100.314	91.8379	91.8413		0.1477	0.5965	19.6948	49.1144	14.0795	0.1886	15.5835	0.0146	0.262				99.7476	0.625879	0.62586	1411.35		-5.3609	0.0313514		5.93699	0.213825		1411.21	60.6633	1411.21	30.3317
	OIB data	Coogan et al. (2014 JP)	340740_13	West Greenland	40.4983	0.098	0.0029	0.1355	8.3312	0.1184	50.5598	0.2816		0.4746		100.516	91.5342	91.5377		0.1563	0.7228	19.3806	48.7973	15.1633	0.2041	15.4064	0.0007	0.2508				100.135	0.628126	0.628107	1429.78		-5.28706	0.0295918		5.87274	0.212482		1429.63	61.6086	1429.63	30.8043
	OIB data	Coogan et al. (2014 JP)	354754_4	West Greenland	39.6127	0.0673	0.0029	0.0569	13.1977	0.1772	46.1797	0.1722		0.4055		99.8975	86.1765	86.1819		0.0844	0.6063	15.4386	42.1118	31.2293	0.2795	9.7415	0.0099	0.213				99.8174	0.646626	0.646607	1387.51		-5.43547	0.0430906		6.02221	0.21674		1387.37	59.7622	1387.37	29.8811
	OIB data	Coogan et al. (2014 JP)	354754_9	West Greenland	39.3087	0.0456	0.0029	0.0613	13.6179	0.1844	46.4851	0.3358		0.3379		100.412	85.879	85.8845		0.0949	0.7107	23.5479	34.3396	28.6547	0.2654	10.6751	0.0161	0.2245				98.6493	0.494511	0.494491	1238.58		-6.24688	0.0635965		6.61559	0.23311		1238.43	53.2628	1238.43	26.6314
	OIB data	Coogan et al. (2014 JP)	362077_1	West Greenland	40.3463	0.1235	0.0029	0.1453	9.6738	0.1378	49.0762	0.271		0.432		100.219	90.0383	90.0423		0.1531	0.6079	20.8033	49.2152	16.1177	0.1836	13.0441	0.0039	0.232				100.401	0.613458	0.613439	1476.51		-5.12663	0.0234818		5.71586	0.209308		1476.37	64.0652	1476.37	32.0326
	OIB data	Coogan et al. (2014 JP)	362077_3	West Greenland	39.8696	0.1015	0.0029	0.1252	10.2431	0.1367	48.9631	0.2809		0.4226		100.161	89.4918	89.4961		0.1262	0.5318	20.1001	48.2281	14.8226	0.2075	15.9306	0.0074	0.2156				100.238	0.616803	0.616783	1432.33		-5.28842	0.0285714		5.86395	0.21233		1432.19	61.749	1432.19	30.8745
	OIB data	Coogan et al. (2014 JP)	362077_6	West Greenland	41.0119	0.1257	0.0029	0.1585	7.9413	0.1151	50.9416	0.2801		0.4744		101.06	91.9542	91.9575		0.1913	0.4641	20.4471	48.6424	15.4744	0.1918	14.651	0.0045	0.2527				100.362	0.614777	0.614757	1485.79		-5.0917	0.0230708		5.6857	0.208745		1485.65	64.5726	1485.65	32.2863
	OIB data	Coogan et al. (2014 JP)	362077_10	West Greenland	40.3872	0.0816	0.0029	0.1174	9.6839	0.1316	49.6208	0.2859		0.4201		100.748	90.1276	90.1315		0.1278	0.6867	18.3404	45.4175	12.3727	0.2421	22.5588	0.0809	0.1624				100.051	0.624237	0.624218	1398.09		-5.41503	0.0355392		5.98409	0.215191		1397.95	60.0936	1397.95	30.0468
	OIB data	Coogan et al. (2014 JP)	400230_1	West Greenland	39.0979	0.084	0.003	0.0981	12.4568	0.1715	46.8804	0.2649		0.4071		99.4783	87.0216	87.0266		0.0934	0.7159	18.79	45.8477	20.8526	0.2357	12.7615	0.0106	0.2136				99.6023	0.620762	0.620742	1400.15		-5.41026	0.0357143		5.97674	0.215121		1400	60.2218	1400	30.1109
	OIB data	Coogan et al. (2014 JP)	400230_3	West Greenland	39.5784	0.0959	0.0029	0.1154	10.6597	0.1394	48.955	0.2769		0.4316		100.284	89.1094	89.1137		0.1319	0.613	19.4551	47.8572	17.4864	0.2203	14.2988	0.0037	0.2393				100.382	0.62267	0.62265	1424.56		-5.31256	0.0302398		5.89079	0.212923		1424.42	61.3586	1424.42	30.6793
	OIB data	Coogan et al. (2014 JP)	400230_7	West Greenland	39.3839	0.0887	0.0029	0.0958	12.8595	0.1797	47.0702	0.2935		0.4112		100.496	86.7046	86.7098		0.0687	0.7243	19.0902	46.3833	21.1284	0.2336	12.4246	0.0079	0.2342				100.383	0.619764	0.619745	1410.14		-5.37167	0.0326945		5.94124	0.214123		1410	60.6608	1410	30.3304
	OIB data	Coogan et al. (2014 JP)	400230_10	West Greenland	39.426	0.0757	0.0029	0.0714	14.1482	0.1864	45.499	0.2968		0.3373		100.06	85.1402	85.1458		0.0775	0.6521	18.456	44.0529	24.3308	0.2348	11.7047	0.0062	0.1865				99.7784	0.615569	0.61555	1380.06		-5.49637	0.0383091		6.04939	0.21681		1379.91	59.2457	1379.91	29.6229
	OIB data	Coogan et al. (2014 JP)	400230_13	West Greenland	40.1615	0.1054	0.0029	0.1337	7.8712	0.1152	50.6419	0.2581		0.4861		99.7949	91.9761	91.9794		0.1075	0.61	26.2921	40.8503	13.7187	0.1624	16.4593	0.0068	0.3068				98.562	0.510355	0.510335	1400.1		-5.51926	0.0275142		5.97691	0.215345		1399.95	60.2811	1399.95	30.1406
	OIB data	Coogan et al. (2014 JP)	400230_16	West Greenland	38.6619	0.089	0.0029	0.0991	12.6715	0.1749	46.7128	0.2682		0.4014		99.1064	86.7863	86.7915		0.1156	0.7464	17.8515	47.7481	20.9976	0.2341	12.5048	0.0062	0.2022				100.502	0.642133	0.642114	1422.54		-5.30121	0.0325843		5.89781	0.213131		1422.39	61.2724	1422.39	30.6362
	OIB data	Coogan et al. (2014 JP)	ED_6	Iceland (Tertiary)	40.031	0.0467	0.0038	0.038	14.1073	0.1824	45.2608	0.3144		0.2296		100.229	85.1103	85.116		0.1838	0.9506	39.7125	20.268	22.1332	0.1596	15.1326	0.0135	0.2171				98.8745	0.255053	0.255038	1186.57		-6.74568	0.0813704		6.85133	0.245218		1186.42	52.24	1186.42	26.12
	OIB data	Coogan et al. (2014 JP)	ED_13	Iceland (Tertiary)	40.349	0.0562	0.0038	0.0493	13.5818	0.1835	45.8933	0.3062		0.2554		100.698	85.7554	85.7609		0.1711	0.904	35.8288	24.8224	21.1767	0.1742	14.9631	0.013	0.2264				98.3828	0.317297	0.317279	1231.22		-6.45759	0.0676157		6.64793	0.237005		1231.08	53.6272	1231.08	26.8136
	OIB data	Coogan et al. (2014 JP)	KoP_4	Iceland (Tertiary)	40.0158	0.0602	0.0038	0.1096	11.5464	0.1598	47.8127	0.2998		0.3631		100.388	88.0634	88.0681		0.1866	0.532	24.3109	40.5544	19.6605	0.2009	13.7624	0.0174	0.2254				99.5364	0.528096	0.528075	1283.48		-6.00101	0.0631229		6.42472	0.22907		1283.34	55.4958	1283.34	27.7479
	OIB data	Coogan et al. (2014 JP)	KoP_13	Iceland (Tertiary)	40.1293	0.0591	0.0038	0.0439	14.7605	0.2074	45.218	0.2741		0.2519		100.955	84.5152	84.5211		0.1738	0.7872	35.5587	23.2688	23.9574	0.1742	14.2375	0.0049	0.2334				98.4714	0.305066	0.305048	1245.55		-6.39971	0.0642978		6.5852	0.235245		1245.41	54.2478	1245.41	27.1239
	OIB data	Coogan et al. (2014 JP)	SAU3199_1	Iceland (Tertiary)	39.9599	0.0469	0.0038	0.0558	13.3194	0.1712	46.3086	0.3081		0.2708		100.458	86.1002	86.1056		0.1385	0.979	27.8792	34.5937	22.106	0.2182	12.9524	0.0024	0.1954				99.159	0.454271	0.454251	1218.14		-6.38762	0.0810235		6.70625	0.239601		1218	53.2757	1218	26.6378
	OIB data	Coogan et al. (2014 JP)	SAU3199_2	Iceland (Tertiary)	40.3377	0.051	0.0038	0.0572	13.6617	0.1765	46.8482	0.3105		0.3032		101.776	85.9344	85.9398		0.1406	0.7712	28.0027	33.5513	23.5547	0.2278	11.8647	0.0124	0.1936				98.3868	0.445605	0.445585	1235.89		-6.30823	0.0745098		6.62738	0.236536		1235.74	53.8534	1235.74	26.9267
	OIB data	Coogan et al. (2014 JP)	SAU3199_7	Iceland (Tertiary)	39.9743	0.0503	0.0038	0.0539	13.0109	0.1815	46.256	0.2955		0.28		100.119	86.3649	86.3702		0.1502	0.9206	32.097	30.0582	21.459	0.198	13.3646	0.0048	0.2267				98.5604	0.385837	0.385818	1217.45		-6.45851	0.0755467		6.70935	0.239127		1217.31	53.1212	1217.31	26.5606
	OIB data	Coogan et al. (2014 JP)	SAU3199_12	Iceland (Tertiary)	39.845	0.0523	0.0038	0.0607	12.8088	0.1801	46.4605	0.3123		0.2931		100.019	86.5995	86.6047		0.1482	0.8297	30.7381	32.362	21.2073	0.1954	13.7955	0.0033	0.2174				99.5931	0.413932	0.413912	1228.41		-6.37626	0.0726577		6.6604	0.237105		1228.26	53.449	1228.26	26.7245
	OIB data	Coogan et al. (2014 JP)	SD_1	Iceland (Tertiary)	40.1185	0.0509	0.0038	0.0345	13.9217	0.1915	46.1985	0.2918		0.2775		101.11	85.533	85.5385		0.142	0.8936	29.0545	31.6835	22.497	0.2104	13.7573	0.0197	0.2173				98.5649	0.422481	0.422461	1232.62		-6.34707	0.0746562		6.64177	0.237143		1232.47	53.7579	1232.47	26.8789
	OIB data	Coogan et al. (2014 JP)	SD_6	Iceland (Tertiary)	39.9606	0.0527	0.0038	0.0554	13.7734	0.1832	46.0921	0.307		0.2733		100.722	85.6367	85.6422		0.152	0.8835	23.6211	36.4183	23.6854	0.2189	12.7351	0.011	0.1839				97.9703	0.508428	0.508407	1265.25		-6.10528	0.0721063		6.50087	0.232813		1265.11	55.0889	1265.11	27.5445
	OIB data	Coogan et al. (2014 JP)	SD_10	Iceland (Tertiary)	40.0723	0.0538	0.0037	0.0426	14.1529	0.182	46.3007	0.2847		0.289		101.401	85.3556	85.3612		0.1622	1.0508	28.7789	30.8072	22.9892	0.19	13.8534	0.0069	0.2256				98.1481	0.41797	0.41795	1246.86		-6.28212	0.0687732		6.57953	0.234602		1246.71	54.1929	1246.71	27.0964
	OIB data	Coogan et al. (2014 JP)	VEY_12	Iceland (Tertiary)	40.928	0.0774	0.0038	0.0905	9.4856	0.1306	49.6908	0.2828		0.4158		101.124	90.3225	90.3264		0.1588	0.3096	28.2397	40.2126	15.8936	0.1854	13.1256	0.0157	0.2087				98.4701	0.48856	0.48854	1314.62		-5.8995	0.0490956		6.29872	0.224449		1314.47	56.5735	1314.47	28.2867
	OIB data	Coogan et al. (2014 JP)	VP1a_10	Iceland (Tertiary)	40.0415	0.0461	0.0038	0.0629	12.5931	0.168	46.6772	0.2707		0.3375		100.214	86.8486	86.8537		0.1646	1.151	23.2669	39.4477	21.5161	0.233	12.0851	0.0079	0.1897				98.1628	0.532137	0.532117	1235.68		-6.22397	0.0824295		6.6283	0.237583		1235.53	54.0769	1235.53	27.0384
	OIB data	Coogan et al. (2014 JP)	VP1a_14	Iceland (Tertiary)	39.9783	0.0399	0.0038	0.0494	13.1116	0.1867	46.0341	0.2833		0.3302		100.035	86.2168	86.2222		0.1379	0.9974	24.4777	37.677	23.2148	0.2167	12.0314	0.0071	0.2191				99.0751	0.508017	0.507996	1201.48		-6.41914	0.0952381		6.78204	0.244484		1201.33	53.1533	1201.33	26.5767
	OIB data	Coogan et al. (2014 JP)	VP1a_2	Iceland (Tertiary)	40.6881	0.0396	0.0038	0.0895	11.9333	0.1534	47.7761	0.2618		0.4016		101.366	87.7043	87.7092		0.1496	0.8574	21.8866	42.2481	21.0903	0.217	12.8403	0.0203	0.2303				99.642	0.564259	0.564239	1211.08		-6.3148	0.0959596		6.73816	0.243238		1210.93	53.5732	1210.93	26.7866
	OIB data	Coogan et al. (2014 JP)	I2_2	Iceland (zero-age)	41.4077	0.0804	0.0056	0.085	9.9533	0.1492	48.8686	0.3402		0.3202		101.207	89.7409	89.745		0.1129	0.1653	29.9365	38.3263	14.2691	0.1675	16.1667	0.0046	0.2133				99.4227	0.462033	0.462013	1315.94		-5.91982	0.0696517		6.2935	0.229008		1315.79	57.8185	1315.79	28.9093
	OIB data	Coogan et al. (2014 JP)	I2_8	Iceland (zero-age)	40.2789	0.0569	0.0057	0.0747	9.9645	0.1642	49.1156	0.3421		0.3121		100.328	89.7769	89.781		0.1273	0.134	29.0588	39.5103	14.6371	0.1703	15.8355	0.0123	0.1993				99.7278	0.477022	0.477001	1244.41		-6.23578	0.100176		6.59016	0.242986		1244.26	55.9485	1244.26	27.9743
	OIB data	Coogan et al. (2014 JP)	I2_20	Iceland (zero-age)	41.1417	0.0691	0.0056	0.0634	9.9764	0.1489	49.2568	0.342		0.3225		101.326	89.7923	89.7964		0.1187	0.2252	29.4876	37.5855	16.6395	0.2021	14.4565	0.0227	0.1944				98.9837	0.460937	0.460917	1285.88		-6.05617	0.081042		6.41484	0.234189		1285.74	56.9109	1285.74	28.4555
	OIB data	Coogan et al. (2014 JP)	I5_6	Iceland (zero-age)	40.3399	0.0678	0.0038	0.0747	12.2072	0.1768	47.2845	0.3049		0.3111		100.796	87.3436	87.3486		0.1102	1.1761	22.57	40.2807	22.3881	0.2286	13.6318	0.0097	0.2221				100.685	0.544887	0.544867	1322.84		-5.80781	0.0560472		6.26627	0.224504		1322.7	57.175	1322.7	28.5875
	OIB data	Coogan et al. (2014 JP)	I5_10	Iceland (zero-age)	40.747	0.0754	0.0037	0.076	11.2473	0.1616	48.4043	0.2954		0.3286		101.357	88.4627	88.4672		0.0985	0.9422	22.4013	41.6118	20.2252	0.2018	14.518	0.0041	0.2006				100.258	0.554791	0.554771	1346.95		-5.69407	0.0490716		6.173	0.221392		1346.81	58.0993	1346.81	29.0496
	OIB data	Coogan et al. (2014 JP)	I5_23	Iceland (zero-age)	40.7708	0.0787	0.0037	0.0771	10.8723	0.1502	48.4662	0.3106		0.3174		101.063	88.817	88.8214		0.181	0.9834	23.3786	40.5784	19.7563	0.197	14.846	0.0039	0.2135				100.215	0.537976	0.537956	1350.9		-5.69393	0.047014		6.15801	0.220954		1350.75	58.2667	1350.75	29.1334
	OIB data	Coogan et al. (2014 JP)	I5_25	Iceland (zero-age)	39.96	0.0677	0.0036	0.0789	11.2784	0.1543	48.293	0.3189		0.3198		100.491	88.4109	88.4155		0.1485	0.9543	23.643	39.4603	20.1502	0.1963	14.7699	0.007	0.2172				99.6079	0.528223	0.528202	1315.68		-5.85574	0.0531758		6.29453	0.224647		1315.53	56.6988	1315.53	28.3494
	OIB data	Coogan et al. (2014 JP)	I5_27	Iceland (zero-age)	40.3369	0.0684	0.0037	0.0747	12.4945	0.1821	47.2834	0.3028		0.3039		101.054	87.084	87.089		0.1056	0.9455	20.2735	42.4344	22.0512	0.2232	13.6856	0.0032	0.2023				99.9978	0.584051	0.584031	1340.75		-5.6917	0.0540936		6.19674	0.222432		1340.6	57.9258	1340.6	28.9629
	OIB data	Coogan et al. (2014 JP)	I5_30	Iceland (zero-age)	39.3496	0.0735	0.0037	0.0895	10.5545	0.1545	48.0325	0.2794		0.3572		98.9062	89.0207	89.0251		0.0757	0.9712	21.8538	42.3665	20.5014	0.2106	14.3003	0.0125	0.2292				100.585	0.565316	0.565296	1344.33		-5.69484	0.0503401		6.183	0.221683		1344.19	57.9875	1344.19	28.9938
	OIB data	Coogan et al. (2014 JP)	I5_32	Iceland (zero-age)	40.246	0.0872	0.0036	0.0929	11.0412	0.1543	47.8829	0.3009		0.3588		100.171	88.5407	88.5452		0.0997	1.163	23.496	40.4038	19.7481	0.2212	14.1311	0.5543	0.1854				100.073	0.535658	0.535638	1374.86		-5.59638	0.0412844		6.06846	0.21845		1374.72	59.3193	1374.72	29.6597
	OIB data	Coogan et al. (2014 JP)	I5_34	Iceland (zero-age)	40.0405	0.0747	0.0037	0.0777	10.9213	0.1719	47.7918	0.3033		0.3322		99.7271	88.6318	88.6363		0.1006	0.9857	22.4925	41.2792	19.3188	0.2102	15.1352	0.0128	0.1992				99.7889	0.551803	0.551783	1344.5		-5.70746	0.0495315		6.18237	0.221676		1344.35	57.9976	1344.35	28.9988
	OIB data	Coogan et al. (2014 JP)	I5_39	Iceland (zero-age)	39.8834	0.0787	0.0036	0.097	10.629	0.1497	48.2089	0.2848		0.3679		99.7157	88.9878	88.9921		0.1411	1.0131	21.6222	43.0264	19.5717	0.192	14.6577	0.0062	0.2294				100.512	0.571721	0.571701	1361.57		-5.61583	0.0457433		6.11779	0.219643		1361.43	58.6852	1361.43	29.3426
	OIB data	Coogan et al. (2014 JP)	I5_42	Iceland (zero-age)	39.6478	0.0699	0.0037	0.087	11.1812	0.163	48.5655	0.2915		0.3682		100.391	88.5564	88.561		0.0864	1.0496	23.8766	39.5715	19.428	0.171	15.415	0.0035	0.2634				99.9178	0.526473	0.526453	1321.1		-5.83359	0.0529328		6.27311	0.224232		1320.95	56.9812	1320.95	28.4906
	OIB data	Coogan et al. (2014 JP)	I5_45	Iceland (zero-age)	39.6816	0.0764	0.0036	0.0986	11.3031	0.1367	48.2237	0.2721		0.3696		100.174	88.3737	88.3783		0.1443	0.9055	19.8761	44.3169	19.6682	0.2206	14.2858	0.0114	0.2321				99.7122	0.599319	0.5993	1368.15		-5.56129	0.0471204		6.09326	0.219145		1368.01	59.0245	1368.01	29.5123
	OIB data	Coogan et al. (2014 JP)	I5_8	Iceland (zero-age)	40.7616	0.0669	0.0038	0.0783	10.4988	0.1583	48.6672	0.3155		0.3344		100.949	89.1994	89.2038		0.1066	1.2442	22.2137	41.9618	20.6731	0.2024	14.2338	0.043	0.2041				100.957	0.558933	0.558913	1320.26		-5.80527	0.0568012		6.2764	0.224679		1320.12	57.035	1320.12	28.5175
	OIB data	Coogan et al. (2014 JP)	I5_2	Iceland (zero-age)	40.7257	0.0578	0.0038	0.072	10.8766	0.1658	47.9994	0.304		0.3857		100.604	88.7165	88.721		0.075	1.0491	23.0805	41.063	20.2501	0.1973	14.7555	0.0081	0.2675				100.818	0.54411	0.54409	1282.5		-5.98975	0.0657439		6.42879	0.229548		1282.35	55.5413	1282.35	27.7706
	OIB data	Coogan et al. (2014 JP)	I5_20	Iceland (zero-age)	40.6802	0.0731	0.0037	0.0713	11.4269	0.1674	47.5896	0.2903		0.3426		100.663	88.1235	88.1282		0.1513	1.1494	23.204	39.5225	21.0046	0.2073	14.7162	0.0073	0.2313				100.229	0.533283	0.533262	1336.43		-5.76025	0.0506156		6.21335	0.222641		1336.29	57.6705	1336.29	28.8352
	OIB data	Coogan et al. (2014 JP)	I5_13	Iceland (zero-age)	40.8252	0.0665	0.0038	0.0732	11.4565	0.1725	47.6629	0.3094		0.3089		100.519	88.1125	88.1172		0.1402	1.1233	24.0012	39.1333	21.3652	0.2337	14.2757	0.0055	0.2179				100.562	0.522398	0.522378	1309.55		-5.88866	0.0571429		6.31891	0.225939		1309.4	56.5858	1309.4	28.2929
	OIB data	Coogan et al. (2014 JP)	I6_2	Iceland (zero-age)	40.983	0.0669	0.0038	0.0823	10.0211	0.1475	49.2169	0.2879		0.373		101.211	89.7438	89.7479		0.1301	0.7666	22.3543	43.1309	17.2249	0.1864	15.2886	0.0019	0.2424				99.3762	0.564145	0.564125	1317.66		-5.81158	0.0568012		6.28667	0.224805		1317.52	56.8807	1317.52	28.4404
	OIB data	Coogan et al. (2014 JP)	I9_10	Iceland (zero-age)	40.6808	0.0824	0.0038	0.0915	10.5104	0.1547	48.7141	0.3198		0.3393		100.901	89.1981	89.2024		0.151	0.3187	30.2697	36.0372	17.1153	0.1846	15.3035	0.0135	0.2003				99.6503	0.444032	0.444012	1323.04		-5.90632	0.0461165		6.26547	0.223881		1322.9	57.0307	1322.9	28.5154
	OIB data	Coogan et al. (2014 JP)	I9_3	Iceland (zero-age)	40.535	0.0749	0.0037	0.0967	9.6644	0.1333	49.5114	0.3179		0.3612		100.7	90.1259	90.1298		0.1878	0.2875	30.8703	34.8708	18.045	0.1807	15.8742	0.028	0.2155				100.639	0.431101	0.43108	1300		-6.0214	0.0493992		6.35727	0.2263		1299.85	55.9944	1299.85	27.9972
	OIB data	Coogan et al. (2014 JP)	I9_2	Iceland (zero-age)	40.8996	0.075	0.0037	0.066	11.3939	0.1726	47.6818	0.3301		0.2852		100.911	88.1739	88.1786		0.135	0.3149	31.5103	33.5554	18.3029	0.1894	15.9	0.0412	0.2194				100.201	0.4167	0.41668	1298.89		-6.04058	0.0493333		6.36175	0.226558		1298.75	55.9793	1298.75	27.9896
	OIB data	Coogan et al. (2014 JP)	I9_1	Iceland (zero-age)	39.9864	0.0674	0.0036	0.0709	12.1122	0.1733	47.7637	0.3235		0.3164		100.831	87.5401	87.545		0.1253	0.3655	31.4772	33.7282	18.1543	0.1766	15.7675	0.0079	0.2076				100.067	0.418205	0.418185	1275.47		-6.14637	0.0534125		6.45797	0.229072		1275.32	54.9262	1275.32	27.4631
	OIB data	Coogan et al. (2014 JP)	I9_5	Iceland (zero-age)	41.3259	0.102	0.0037	0.1303	10.2447	0.1448	48.9314	0.3196		0.3663		101.571	89.4843	89.4885		0.1583	0.3634	32.0047	33.2124	18.914	0.1862	15.4968	0.0429	0.2197				100.641	0.410433	0.410413	1367.86		-5.74867	0.0362745		6.09436	0.219701		1367.71	59.153	1367.71	29.5765
	OIB data	Coogan et al. (2014 JP)	I9_16	Iceland (zero-age)	39.6032	0.0711	0.0036	0.0882	10.0178	0.1436	48.4327	0.3202		0.3675		99.0608	89.5981	89.6023		0.1443	0.2825	32.0298	35.0372	16.8427	0.1943	16.3391	0.0048	0.2256				101.163	0.423243	0.423223	1282.18		-6.11033	0.0506329		6.4301	0.227976		1282.04	55.1384	1282.04	27.5692
	OIB data	Coogan et al. (2014 JP)	I9_24	Iceland (zero-age)	39.9901	0.0787	0.0036	0.0898	11.3213	0.1599	47.5623	0.3124		0.3161		99.8424	88.2144	88.219		0.1318	0.3403	30.9148	34.4776	17.4301	0.1951	15.823	0.0139	0.2131				99.5883	0.427969	0.427949	1311.43		-5.97335	0.0457433		6.3114	0.224871		1311.28	56.4523	1311.28	28.2261
	OIB data	Coogan et al. (2014 JP)	I9_26	Iceland (zero-age)	40.2248	0.0851	0.0036	0.0997	9.7951	0.1331	48.5444	0.3115		0.3731		99.5779	89.8268	89.8309		0.1578	0.2756	32.3289	35.432	15.037	0.1763	17.0874	0.0066	0.2469				100.817	0.423709	0.423689	1319.96		-5.93989	0.0423032		6.27762	0.223757		1319.81	56.7788	1319.81	28.3894
	OIB data	Coogan et al. (2014 JP)	I9_28	Iceland (zero-age)	40.5993	0.0872	0.0037	0.0997	10.7511	0.1705	48.4336	0.3164		0.331		100.8	88.9212	88.9256		0.1939	0.277	30.9836	35.5844	15.7504	0.1912	16.4108	0.0026	0.2237				99.6726	0.435175	0.435155	1332.71		-5.87301	0.0424312		6.22777	0.222711		1332.56	57.422	1332.56	28.711
	OIB data	Coogan et al. (2014 JP)	I9_30	Iceland (zero-age)	40.0781	0.0836	0.0036	0.0859	11.3437	0.1764	48.0968	0.3163		0.3282		100.525	88.3097	88.3143		0.1897	0.3136	30.3236	35.7752	17.149	0.1947	15.8662	0.0223	0.2394				100.136	0.441793	0.441773	1326.45		-5.89364	0.0430622		6.25212	0.223173		1326.31	57.0936	1326.31	28.5468
	OIB data	Coogan et al. (2014 JP)	I9_32	Iceland (zero-age)	39.5519	0.0419	0.0037	0.0419	11.9074	0.1826	47.6221	0.3251		0.3064		100.009	87.693	87.6978		0.1655	0.3561	30.6234	33.9719	18.5172	0.1913	15.5661	0.045	0.2124				99.7141	0.426671	0.42665	1183.2		-6.59423	0.0883055		6.86719	0.245015		1183.05	51.9559	1183.05	25.9779
	OIB data	Coogan et al. (2014 JP)	I9_34	Iceland (zero-age)	40.1291	0.0519	0.0037	0.0564	12.0519	0.1771	47.7042	0.3262		0.29		100.612	87.5809	87.5858		0.1414	0.352	29.9782	34.3831	18.7557	0.181	15.5805	0.0366	0.2055				99.6597	0.434842	0.434822	1227.75		-6.35891	0.0712909		6.66332	0.236549		1227.6	53.2769	1227.6	26.6384
	OIB data	Coogan et al. (2014 JP)	I9_36	Iceland (zero-age)	40.1205	0.0859	0.0037	0.0846	11.3243	0.1655	48.1671	0.3135		0.3347		100.695	88.3424	88.347		1.0354	0.2923	30.703	33.995	16.7348	0.1646	15.9048	0.0281	0.2208				99.1299	0.426202	0.426182	1333.38		-5.87893	0.0430733		6.22515	0.222876		1333.24	57.5128	1333.24	28.7564
	OIB data	Coogan et al. (2014 JP)	I9_38	Iceland (zero-age)	40.3578	0.0701	0.0036	0.0894	10.9325	0.1495	48.4184	0.312		0.3433		100.354	88.7522	88.7566		0.1647	0.3048	30.9719	34.9756	18.1894	0.1993	15.7463	0.0279	0.2038				100.832	0.431031	0.43101	1284.73		-6.09091	0.0513552		6.41956	0.227808		1284.59	55.2788	1284.59	27.6394
	OIB data	Coogan et al. (2014 JP)	I9_40	Iceland (zero-age)	39.8237	0.0864	0.0037	0.0977	10.8741	0.1747	48.608	0.3133		0.3587		100.526	88.8443	88.8488		0.2508	0.2995	31.3132	34.4595	17.1731	0.1809	15.995	0.005	0.2285				99.9723	0.424709	0.424689	1330.52		-5.89281	0.0428241		6.23627	0.223061		1330.37	57.3553	1330.37	28.6777
	OIB data	Coogan et al. (2014 JP)	BH22	Borgahraun	40.8617	0.07175	0.003		10.1868		47.0532	0.36725		0.2768		99.246	89.1719	89.1694				24.9549	43.679	14.7604		15.4793						99.603	0.540052	0.540038	1320.21	20.7012	-5.85164	0.0418118		6.30131	0.22269		1313.82	56.084	1313.82	28.042
	OIB data	Coogan et al. (2014 JP)	BH22	Borgahraun	40.6855	0.064	0.003		11.2094		46.4139	0.370183		0.302717		99.4423	88.0698	88.0674				26.742	40.9389	16.024		15.2528						99.7129	0.506678	0.506635	1280.31	19.782	-6.03511	0.046875		6.43636	0.226386		1280.52	54.6473	1280.52	27.3237
	OIB data	Coogan et al. (2014 JP)	BH22	Borgahraun	40.0691	0.052	0.003		14.0238		44.498	0.380067		0.232567		99.7109	84.9783	84.9753				22.7943	40.6339	21.6702		12.8131						99.3921	0.54522	0.54458	1262.71	24.7879	-6.08302	0.0576923		6.51288	0.229341		1262.27	54.0675	1262.27	27.0337
	OIB data	Coogan et al. (2014 JP)	BH22	Borgahraun	40.1989	0.07558	0.003		11.3636		46.8025	0.331436		0.277907		99.3043	88.014	88.0114				44.3297	20.7462	14.2089		18.4244						98.426	0.238933	0.238923	1264.19	18.4088	-6.37422	0.039693		6.50388	0.230242		1264.39	54.4301	1264.39	27.2151
	OIB data	Coogan et al. (2014 JP)	BH38	Borgahraun	40.3336	0.0724429	0.003		9.7141		47.7375	0.381443		0.289857		98.7714	89.7556	89.7534				37.9376	27.8758	13.1353		17.9771						97.7883	0.330169	0.330155	1267.78	22.601	-6.2609	0.041412		6.48289	0.228746		1269.37	54.4273	1269.37	27.2136
	OIB data	Coogan et al. (2014 JP)	BH38	Borgahraun	40.7515	0.0817	0.003		8.30365		48.5352	0.3972		0.353264		98.7215	91.2443	91.2422				21.4966	46.7606	13.3375		15.5982						97.9972	0.593368	0.593353	1382.51	27.3162	-5.5726	0.0367197		6.09814	0.217689		1366.69	58.5385	1366.69	29.2692
	OIB data	Coogan et al. (2014 JP)	BH38	Borgahraun	40.8336	0.083375	0.003		8.25911		48.6174	0.4049		0.350675		98.8602	91.3006	91.2985				21.2206	46.2249	13.5826		15.7489						97.5885	0.593713	0.593691	1371.3	21.8776	-5.53938	0.035982		6.06865	0.217061		1374.66	58.9383	1374.66	29.4691
	OIB data	Coogan et al. (2014 JP)	BH47	Borgahraun	40.7638	0.0940667	0.003		8.895		48.4476	0.3611		0.347067		99.2622	90.6636	90.6614				21.8574	46.4553	13.3708		16.6511						99.0956	0.587756	0.587746	1398.55	19.6939	-5.44829	0.0318923		5.98168	0.215066		1398.62	60.1071	1398.62	30.0535
	OIB data	Coogan et al. (2014 JP)	BH47	Borgahraun	40.989	0.08394	0.003		8.39063		48.968	0.364233		0.345833		99.4485	91.2319	91.2299				21.4808	46.7912	13.8237		16.3276						99.1633	0.593702	0.593689	1377.4	22.3175	-5.54481	0.0357398		6.07352	0.217115		1373.34	58.8586	1373.34	29.4293
	OIB data	Coogan et al. (2014 JP)	BH62	Borgahraun	39.907	0.0752333	0.003		10.3576		47.3584	0.387957		0.2978		98.634	89.0733	89.071				41.9587	22.3717	13.329		18.8242						97.1293	0.263448	0.263435	1269.84	18.4176	-6.32385	0.0398759		6.48037	0.229447		1269.97	54.6366	1269.97	27.3183
	OIB data	Coogan et al. (2014 JP)	BH62	Borgahraun	40.9078	0.07735	0.003		9.8647		47.8858	0.400075		0.2982		99.7214	89.6422	89.6399				42.8079	22.3718	13.2756		19.2273						98.3946	0.259587	0.259567	1277.45	20.0228	-6.31614	0.0387847		6.47003	0.229156		1272.44	54.7417	1272.44	27.3708
	OIB data	Coogan et al. (2014 JP)	BH62	Borgahraun	40.7836	0.07	0.003		9.97095		47.6711	0.400875		0.3022		99.4559	89.5002	89.4978				37.9627	27.5928	14.0183		18.3227						98.6131	0.327772	0.327757	1265.45	23.2973	-6.29587	0.0428571		6.51213	0.229552		1262.45	54.1297	1262.45	27.0648
	OIB data	Coogan et al. (2014 JP)	BH62	Borgahraun	40.8543	0.08372	0.003		9.92071		47.8118	0.41181		0.29799		99.6338	89.5751	89.5728				43.6567	21.3886	13.4704		18.9383						98.1806	0.247362	0.24735	1287.68	20.64	-6.25663	0.0358337		6.40586	0.22772		1287.92	55.494	1287.92	27.747
	OIB data	Coogan et al. (2014 JP)	BH62	Borgahraun	40.3674	0.0557167	0.003		11.3107		46.5913	0.3429		0.28755		99.4167	88.0156	88.0129				26.1838	39.6433	17.034		15.3163						98.9408	0.50391	0.50387	1255.79	21.2475	-6.15262	0.0538439		6.53932	0.229576		1256.06	53.6861	1256.06	26.8431
	OIB data	Coogan et al. (2014 JP)	BH62	Borgahraun	40.5208	0.0802	0.003		10.814		47.0237	0.351267		0.3014		99.3665	88.5747	88.5724				42.1134	23.499	13.1257		18.7422						98.1531	0.272367	0.272355	1278.98	18.7359	-6.2636	0.0374065		6.43421	0.228095		1281.04	55.0967	1281.04	27.5484
	OIB data	Coogan et al. (2014 JP)	BH62	Borgahraun	40.4616	0.085275	0.003		10.755		46.9729	0.343709		0.301956		99.1673	88.6193	88.6168				41.3766	24.2556	14.0208		18.3843						98.7459	0.282256	0.282243	1294	20.3613	-6.18459	0.0351803		6.37208	0.226479		1296.2	55.7784	1296.2	27.8892
	OIB data	Coogan et al. (2014 JP)	BH62	Borgahraun	40.4272	0.0786611	0.003		11.5488		46.5368	0.315383		0.291744		99.4642	87.7814	87.7787				39.8142	25.3069	15.143		17.8659						98.8778	0.298933	0.29892	1282.93	19.1248	-6.22683	0.0381383		6.42471	0.227625		1283.34	55.1457	1283.34	27.5729
	OIB data	Coogan et al. (2014 JP)	BH62	Borgahraun	39.8212	0.0588333	0.003		12.5656		45.3902	0.37506		0.24738		98.8349	86.5595	86.5567				26.4038	37.0109	19.3689		14.6871						98.387	0.484622	0.484606	1257.77	32.7793	-6.10655	0.0509915		6.48097	0.228203		1269.83	54.3302	1269.83	27.1651
	OIB data	Coogan et al. (2014 JP)	BH70	Borgahraun	40.6061	0.07492	0.003		10.2648		47.2638	0.32862		0.309707		99.0984	89.1413	89.1389				41.2217	24.9215	14.2528		17.8714						98.9391	0.288542	0.28853	1267.42	18.6349	-6.3103	0.0400427		6.4904	0.229293		1267.59	54.4313	1267.59	27.2157
	OIB data	Coogan et al. (2014 JP)	HBT2	Herdubreidartogl	39.8662	0.0523364	0.003		14.0786		43.7869	0.333191		0.2419		98.708	84.7211	84.7181				27.5244	33.6316	22.8025		13.9054						99.0516	0.450453	0.450437	1238.03	26.9482	-6.26514	0.0573215		6.59301	0.231938		1243.61	53.3586	1243.61	26.6793
	OIB data	Coogan et al. (2014 JP)	HBT2	Herdubreidartogl	39.7439	0.0524	0.003		14.4113		43.4267	0.315667		0.239967		98.5197	84.3075	84.3042				27.6804	33.2994	33.2994		13.6329						98.4092	0.4466	0.446583	1249.91	22.2585	-6.26957	0.0572519		6.59359	0.231986		1243.48	53.3602	1243.48	26.6801
	OIB data	Coogan et al. (2014 JP)	HBT2	Herdubreidartogl	40.6149	0.0589	0.003		12.2865		46.007	0.338314		0.274814		99.8691	86.9725	86.9696				29.2895	33.9499	19.8012		14.9911						99.1376	0.437447	0.437419	1257.67	20.574	-6.20914	0.0509338		6.53128	0.229741		1257.94	53.857	1257.94	26.9285
	OIB data	Coogan et al. (2014 JP)	HBT2	Herdubreidartogl	40.4292	0.05587	0.003		12.2731		45.726	0.343027		0.284791		99.4301	86.9154	86.9125				30.2982	34.3368	18.5874		15.3476						99.8521	0.4319	0.431884	1240.72	22.0167	-6.29582	0.0536961		6.60413	0.231694		1241.05	53.1231	1241.05	26.5615
	OIB data	Coogan et al. (2014 JP)	HBT2	Herdubreidartogl	40.3216	0.0538571	0.003		13.0827		45.217	0.338457		0.2604		99.6077	86.0375	86.0345				26.3116	35.1957	21.4519		14.944						99.6477	0.472986	0.472931	1250.78	25.0569	-6.19143	0.0557029		6.54678	0.230462		1254.32	53.7704	1254.32	26.8852
	OIB data	Coogan et al. (2014 JP)	HBT2	Herdubreidartogl	39.9783	0.053075	0.003		14.068		44.2675	0.31895		0.243175		99.2503	84.8717	84.8685				25.9269	35.3449	22.5382		13.9406						99.0346	0.477678	0.477658	1254.69	21.3858	-6.19133	0.0565238		6.55087	0.230639		1253.36	53.7446	1253.36	26.8723
	OIB data	Coogan et al. (2014 JP)	HBT2	Herdubreidartogl	40.1694	0.05045	0.003		14.0786		44.17	0.321675		0.243275		99.3634	84.8337	84.8305				27.7301	33.1015	23.2092		14.1152						99.3518	0.444686	0.444668	1236.17	21.9778	-6.30929	0.0594648		6.62752	0.233097		1235.71	53.0682	1235.71	26.5341
	OIB data	Coogan et al. (2014 JP)	HBT2	Herdubreidartogl	40.1399	0.0511286	0.003		12.7164		45.5787	0.344114		0.248871		99.3911	86.4689	86.4657				28.3245	34.532	20.5646		14.6576						99.2065	0.449905	0.449884	1233.71	22.6772	-6.31714	0.0586756		6.63917	0.233087		1233.06	52.88	1233.06	26.44
	OIB data	Coogan et al. (2014 JP)	HBT2	Herdubreidartogl	40.2052	0.04964	0.003		13.3559		44.466	0.33678		0.25019		98.9665	85.582	85.579				29.2341	33.6736	20.9469		14.6586						99.631	0.435885	0.435874	1223.03	21.6595	-6.3783	0.0604351		6.68164	0.234437		1223.49	52.5121	1223.49	26.2561
	OIB data	Coogan et al. (2014 JP)	HBT2	Herdubreidartogl	40.1499	0.05216	0.003		13.5111		44.4895	0.33494		0.24916		99.0912	85.4454	85.4423				29.2701	33.5485	20.8786		14.6332						99.4169	0.434679	0.434657	1226.97	22.9423	-6.33001	0.0575153		6.63725	0.23302		1233.5	52.8951	1233.5	26.4476
	OIB data	Coogan et al. (2014 JP)	KS01	Kistufell	38.9151	0.064075	0.003		11.3003		45.8458	0.325764		0.299209		96.9997	87.854	87.8514				37.1087	26.6062	15.6788		16.7745						96.999	0.324765	0.324755	1249.01	20.0379	-6.36155	0.0468201		6.5684	0.231292		1249.29	53.6096	1249.29	26.8048
	OIB data	Coogan et al. (2014 JP)	KS01	Kistufell	39.6206	0.0642714	0.003		11.2279		45.8026	0.3234		0.306238		97.5993	87.9126	87.9099				37.0738	26.8396	15.8259		16.8718						97.467	0.326895	0.32688	1249.13	24.9768	-6.35755	0.046677		6.56669	0.231206		1249.69	53.6175	1249.69	26.8087
	OIB data	Coogan et al. (2014 JP)	KS01	Kistufell	38.9825	0.0653	0.003		11.0786		45.4943	0.320985		0.306254		96.5116	87.9829	87.9802				36.7955	26.6143	15.8088		16.5507						96.6279	0.326696	0.326683	1254.32	19.3812	-6.33414	0.0459418		6.54551	0.230685		1254.61	53.8433	1254.61	26.9216
	OIB data	Coogan et al. (2014 JP)	KS02	Kistufell	39.4468	0.0781	0.003		11.5152		45.6569	0.3594		0.276		97.6606	87.607	87.6042				35.9237	27.0529	16.3035		16.3772						96.7676	0.335638	0.335614	1295.86	24.9154	-6.13116	0.0384123		6.37133	0.226128		1296.38	55.705	1296.38	27.8525
	OIB data	Coogan et al. (2014 JP)	KS02	Kistufell	38.037	0.0712667	0.003		11.2637		44.7616	0.333117		0.2909		95.0292	87.6317	87.6288				36.6764	26.9919	16.1673		16.2545						96.9939	0.33052	0.330507	1272.84	19.2365	-6.24346	0.0420954		6.46755	0.228549		1273.03	54.6387	1273.03	27.3193
	OIB data	Coogan et al. (2014 JP)	KS02	Kistufell	39.1395	0.0572875	0.003		11.3705		45.5503	0.328071		0.295824		96.9986	87.7183	87.7156				36.3896	27.2375	16.434		16.7371						97.6743	0.334267	0.334258	1228.15	20.2803	-6.45396	0.0523674		6.65968	0.23386		1228.42	52.729	1228.42	26.3645
	OIB data	Coogan et al. (2014 JP)	TP01	Theistareykir	39.8158	0.07385	0.003		10.0574		46.8668	0.355793		0.331714		97.8131	89.2568	89.2543				30.5037	35.2684	14.9003		15.8124						97.2704	0.436815	0.4368	1293.34	23.7778	-6.02357	0.0406229		6.36427	0.224948		1298.12	55.5374	1298.12	27.7687
	OIB data	Coogan et al. (2014 JP)	TP01	Theistareykir	38.9945	0.0775727	0.003		9.98387		46.1217	0.349027		0.335518		96.16	89.1728	89.1707				30.1724	34.8174	14.9743		15.6012						96.3769	0.436351	0.436321	1315.03	31.7377	-5.96347	0.0386734		6.30994	0.223665		1311.65	56.1758	1311.65	28.0879
	OIB data	Coogan et al. (2014 JP)	TP01	Theistareykir	39.4157	0.0879	0.003		10.4724		46.472	0.388243		0.305471		97.5636	88.779	88.7763				27.3047	35.8839	17.9951		15.2738						97.2307	0.468541	0.468524	1354.78	36.5789	-5.73861	0.0341297		6.13671	0.219475		1356.39	58.2793	1356.39	29.1396
	OIB data	Coogan et al. (2014 JP)	TP01	Theistareykir	40.4026	0.0966	0.003		9.75767		47.7555	0.377		0.308124		98.9843	89.7179	89.7156				32.8184	32.92	14.3491		17.0474						97.8708	0.402243	0.402224	1350.6	17.9207	-5.82817	0.0310559		6.15843	0.220338		1350.64	58.0964	1350.64	29.0482
	OIB data	Coogan et al. (2014 JP)	TP01	Theistareykir	40.125	0.0982923	0.003		9.79918		47.3941	0.383885		0.312462		98.4149	89.6082	89.6059				32.4562	33.5419	14.4025		16.5432						97.6599	0.409426	0.409412	1355.03	25.8998	-5.7997	0.0305212		6.13925	0.219832		1355.71	58.3258	1355.71	29.1629
	OIB data	Coogan et al. (2014 JP)	TP01	Theistareykir	40.7118	0.0814067	0.003		9.77916		47.8009	0.380676		0.307653		99.3718	89.7064	89.7041				32.0398	34.2029	14.2087		16.9153						98.0655	0.417289	0.417276	1312.97	21.8148	-5.97528	0.036852		6.3037	0.223548		1313.22	56.2574	1313.22	28.1287
	OIB data	Coogan et al. (2014 JP)	TP01	Theistareykir	39.9714	0.0634	0.003		10.5867		46.4263	0.3884		0.30145		98.0187	88.6601	88.6578				30.7099	35.1984	15.3		15.5491						97.4757	0.434671	0.434655	1259.53	20.7582	-6.18288	0.0473186		6.50528	0.228664		1264.06	54.034	1264.06	27.017
	OIB data	Coogan et al. (2014 JP)	TP01	Theistareykir	39.7384	0.087025	0.003		10.0593		47.0148	0.377025		0.3152		97.896	89.2852	89.2827				29.4188	35.9112	15.2773		15.6991						97.0778	0.450211	0.450195	1339.69	30.484	-5.82319	0.0344729		6.19638	0.220836		1340.7	57.5167	1340.7	28.7583
	OIB data	Coogan et al. (2014 JP)	TP01	Theistareykir	32.157	0.06638	0.003		9.00884		43.3281	0.3547		0.319129		85.5309	89.5558	89.5536				31.6102	30.891	13.3742		14.2255						90.773	0.395992	0.395963	1275.13	26.504	-6.16584	0.0451943		6.45579	0.2279		1275.85	54.6821	1275.85	27.3411
	OIB data	Coogan et al. (2014 JP)	TP02	Theistareykir	40.2694	0.07044	0.003		10.1321		47.5382	0.38805		0.309467		99.0437	89.3219	89.3195				32.4826	33.4346	14.548		16.6983						97.9586	0.40846	0.408442	1276.28	31.0013	-6.1337	0.0425894		6.43799	0.226993		1280.13	54.7661	1280.13	27.3831
	OIB data	Coogan et al. (2014 JP)	TP02	Theistareykir	40.5234	0.0696667	0.003		10.8349		46.8288	0.372462		0.300996		99.223	88.5133	88.5107				34.6769	31.2704	15.3072		16.4444						98.4661	0.376921	0.376906	1270.19	18.9085	-6.21011	0.0430622		6.47865	0.228259		1270.38	54.3824	1270.38	27.1912
	OIB data	Coogan et al. (2014 JP)	TP02	Theistareykir	40.8356	0.0695	0.003		10.4718		47.5872	0.3818		0.3002		99.9884	89.0133	89.0109				33.9118	31.4582	14.9863		17.0297						98.1262	0.383591	0.383574	1267.93	21.8415	-6.19019	0.0431655		6.46668	0.227957		1273.24	54.5117	1273.24	27.2558
	OIB data	Coogan et al. (2014 JP)	TP02	Theistareykir	40.2272	0.0774667	0.003		10.4107		46.9654	0.3813		0.308467		98.7178	88.9418	88.9393				34.5803	31.3512	15.4571		16.4709						98.6111	0.378183	0.378168	1283.88	24.5821	-6.10119	0.0387263		6.38207	0.225789		1293.74	55.4343	1293.74	27.7172
	OIB data	Coogan et al. (2014 JP)	TP02	Theistareykir	40.4716	0.0740286	0.003		10.1414		47.399	0.384911		0.293133		99.0674	89.2848	89.2827				29.8189	35.5911	17.0931		14.6904						97.942	0.444641	0.444642	1301.73	18.9275	-5.99844	0.0405249		6.34867	0.224542		1301.98	55.71	1301.98	27.855
	OIB data	Coogan et al. (2014 JP)	TP02	Theistareykir	40.1519	0.09195	0.003		10.1403		46.94	0.382227		0.308918		98.3092	89.1928	89.1903				26.4081	40.5577	16.3313		14.3644						98.3792	0.507455	0.507438	1347.36	41.4524	-5.66018	0.0326264		6.10076	0.218175		1365.99	58.6187	1365.99	29.3094
	OIB data	Coogan et al. (2014 JP)	TP02	Theistareykir	39.9857	0.0754143	0.003		10.5304		46.951	0.366362		0.295937		98.5001	88.8257	88.8233				35.8809	29.3677	14.6245		17.1798						97.7289	0.354445	0.354433	1284.81	18.5378	-6.16496	0.0397803		6.41829	0.226944		1284.9	55.091	1284.9	27.5455
	OIB data	Coogan et al. (2014 JP)	TP02	Theistareykir	42.5343	0.0681	0.003		9.18425		30.2868	5.17955		0.18195		98.2054	82.4959	85.4607				35.8809	29.3677	14.6245		17.1798						97.7289	0.354445	0.354433	1307.97	38.5736	-6.26698	0.0440529		6.5098	0.229313		1263	54.1121	1263	27.056
	OIB data	Coogan et al. (2014 JP)	TO5-3SP1-1	Low-Ti group	41.1749	0.06879	0.003	0.127561	6.92475	0.110014	50.8409	0.144903	0.00538519	0.569988	0.00349441	100	92.901	92.901	TO5-3SP1	0	0.175687	9.39204	58.1564	17.2011	0.232551	13.1958				0.14909		98.6891	0.805971	0.80596	1482.11		-4.91656	0.043611		5.69762	0.20996		1481.97	64.6769	1481.97	32.3384
	OIB data	Coogan et al. (2014 JP)	TO5-3SP1-2	Low-Ti group	41.2184	0.0698023	0.003	0.139237	7.10919	0.110652	50.5578	0.219419	0.00767968	0.534754	0.00417621	100	92.6879	92.6879	TO5-3SP1	-1.39175e-17	0.175684	9.3919	58.1555	17.2004	0.232546	13.1966				0.149191		98.6881	0.805971	0.80596	1486.17		-4.90194	0.0429785		5.68451	0.209641		1486.02	64.8771	1486.02	32.4385
	OIB data	Coogan et al. (2014 JP)	TO5-3SP1-3	Low-Ti group	41.2135	0.0690138	0.003	0.139993	7.11819	0.111255	50.5666	0.222752	0.00673606	0.519493	0.00377885	100	92.6805	92.6805	TO5-3SP1	0	0.175685	9.39191	58.1555	17.2004	0.232544	13.1965				0.149235		98.6882	0.805971	0.80596	1483.02		-4.9133	0.0434696		5.6947	0.209889		1482.87	64.7214	1482.87	32.3607
	OIB data	Coogan et al. (2014 JP)	TO5-49SP1-1	Low-Ti group	40.8764	0.100039	0.003	0.127522	8.15745	0.123128	49.9501	0.224672	0.0075583	0.401645	0.00277612	100	91.6067	91.6067	TO5-49SP1	0	0.139973	13.431	52.015	20.263	0.23696	12.0501				0.132045		98.5373	0.722067	0.722053	1510.04		-4.89975	0.0299882		5.60837	0.207211		1509.9	65.8777	1509.9	32.9389
	OIB data	Coogan et al. (2014 JP)	TO5-49SP1-2	Low-Ti group	40.9859	0.106133	0.003	0.152013	7.78117	0.119045	50.1821	0.225709	0.0108213	0.404298	0.00386841	100	91.997	91.997	TO5-49SP1	0	0.13997	13.4308	52.0143	20.2648	0.236979	12.0495				0.132036		98.5376	0.722067	0.722053	1527.07		-4.84061	0.0282663		5.55532	0.206144		1526.93	66.7965	1526.93	33.3982
	OIB data	Coogan et al. (2014 JP)	TO5-49SP1-3	Low-Ti group	40.974	0.0951325	0.003	0.139094	7.90782	0.120688	50.0928	0.22457	0.00926907	0.404487	0.00258458	100	91.864	91.864	TO5-49SP1	0	0.139973	13.431	52.015	20.2644	0.236974	12.05				0.132036		98.5386	0.722066	0.722053	1495.82		-4.95005	0.031535		5.65349	0.208141		1495.67	65.1214	1495.67	32.5607
	OIB data	Coogan et al. (2014 JP)	TO5-7SP1-1	Low-Ti group	41.232	0.0692237	0.003	0.135441	6.81571	0.105256	50.944	0.216016	0.00529249	0.443869	0.00285618	100	93.0181	93.0181	TO5-7SP1	0	0.177128	9.35428	59.7281	16.4793	0.232556	12.4771				0.133012		98.8113	0.810726	0.810716	1483.67		-4.90625	0.0433377		5.69258	0.209797		1483.52	64.7415	1483.52	32.3707
	OIB data	Coogan et al. (2014 JP)	TO5-7SP1-2	Low-Ti group	41.2042	0.0695341	0.003	0.131775	6.88738	0.105646	50.9113	0.211074	0.00275295	0.443197	0.00356736	100	92.9457	92.9457	TO5-7SP1	0	0.177127	9.35419	59.7276	16.4779	0.232546	12.477				0.133016		98.8092	0.810726	0.810716	1484.91		-4.90176	0.0431443		5.68855	0.2097		1484.77	64.8029	1484.77	32.4015
	OIB data	Coogan et al. (2014 JP)	TO5-7SP1-3	Low-Ti group	41.1995	0.0682163	0.003	0.121388	6.88057	0.105284	50.9421	0.2075	0.00318787	0.439039	0.00264459	100	92.9561	92.9561	TO5-7SP1	0	0.177113	9.35397	59.7262	16.4776	0.232546	12.4761				0.133077		98.8065	0.810726	0.810716	1479.63		-4.92087	0.0439777		5.7057	0.210119		1479.48	64.5427	1479.48	32.2714
	OIB data	Coogan et al. (2014 JP)	TO6-61SP1-1	Low-Ti group	41.1102	0.0927036	0.003	0.148103	6.30082	0.100733	51.61	0.204973	0.0087747	0.393783	0.00295776	100	93.5897	93.5897	TO6-61SP1	0	0.200411	16.5427	51.7081	16.2849	0.209902	12.8575				0.114969		98.2032	0.677091	0.677077	1444.07		-5.18429	0.0323612		5.82385	0.2115		1443.93	62.3578	1443.93	31.1789
	OIB data	Coogan et al. (2014 JP)	TO6-61SP1-2	Low-Ti group	41.1077	0.102928	0.003	0.155516	6.32293	0.101645	51.567	0.209665	0.00738602	0.395026	0.00265897	100	93.5637	93.5637	TO6-61SP1	0	0.200392	16.5401	51.7023	16.2812	0.209795	12.86				0.114839		98.1933	0.677101	0.677086	1472.24		-5.07951	0.0291465		5.72987	0.209526		1472.09	63.8188	1472.09	31.9094
	OIB data	Coogan et al. (2014 JP)	TO6-61SP1-3	Low-Ti group	41.1108	0.11015	0.003	0.174127	6.28914	0.101585	51.5725	0.203258	0.00992703	0.398516	0.00117945	100	93.5965	93.5965	TO6-61SP1	0	0.2003	16.5363	51.6909	16.2814	0.209762	12.8574				0.114493		98.1751	0.677102	0.677088	1491.03		-5.01147	0.0272355		5.66883	0.208291		1490.88	64.8162	1490.88	32.4081
	OIB data	Coogan et al. (2014 JP)	TO6-67SP1-1	Low-Ti group	40.9489	0.0716118	0.003	0.153654	7.48912	0.11586	50.5619	0.187699	0.00421246	0.431105	0.00352671	100	92.3277	92.3277	TO6-67SP1	0	0.295545	7.76534	57.5616	20.0253	0.260104	11.7537				0.152164		97.9963	0.83257	0.832561	1540.41		-4.68617	0.0418925		5.51447	0.20655		1540.26	67.923	1540.26	33.9615
	OIB data	Coogan et al. (2014 JP)	TO6-67SP1-2	Low-Ti group	40.9258	0.0780228	0.003	0.162567	7.59671	0.1178	50.4496	0.19368	0.00501913	0.435171	0.00246036	100	92.2101	92.2101	TO6-67SP1	0	0.29555	7.76556	57.5634	20.0253	0.2601	11.7546				0.152141		97.9992	0.83257	0.832561	1566.05		-4.60045	0.0384503		5.43759	0.204799		1565.9	69.2653	1565.9	34.6327
	OIB data	Coogan et al. (2014 JP)	TO-010513-5-26-ol01	Low-Ti group	40.7982	0.0718576	0.003	0.135543	8.17927	0.126993	50.0333	0.205974	0.00545228	0.411034	0.00437602	100	91.599	91.599	TO-010513-5-26-sp1	0	0.211484	8.51953	58.1216	19.3186	0.215962	11.1341				0.118164		97.8692	0.820677	0.820667	1517.82		-4.77543	0.0417492		5.58403	0.207713		1517.67	66.6144	1517.67	33.3072
	OIB data	Coogan et al. (2014 JP)	TO-010513-5-26-ol02	Low-Ti group	40.8138	0.0727979	0.003	0.137673	8.17166	0.127406	50.021	0.203316	0.00536275	0.413027	0.00521685	100	91.6043	91.6043	TO-010513-5-26-sp1	0	0.21148	8.5195	58.1214	19.3187	0.215958	11.1343				0.118145		97.8693	0.820677	0.820668	1521.57		-4.76243	0.04121		5.57237	0.20744		1521.42	66.8055	1521.42	33.4028
	OIB data	Coogan et al. (2014 JP)	TO-010513-5-26-ol03	Low-Ti group	40.8717	0.0720558	0.003	0.127976	8.09447	0.124478	50.0625	0.202771	0.00640608	0.405613	0.00339301	100	91.6833	91.6833	TO-010513-5-26-sp1	0	0.211483	8.51938	58.1207	19.3193	0.215985	11.1345				0.118221		97.8693	0.820677	0.820668	1518.62		-4.77266	0.0416344		5.58154	0.207655		1518.47	66.655	1518.47	33.3275
	OIB data	Coogan et al. (2014 JP)	TO-010513-5-26-ol03	Low-Ti group	40.8843	0.0740682	0.003	0.13285	8.09677	0.125457	50.0413	0.203996	0.00659406	0.403422	0.00375669	100	91.6779	91.6779	TO-010513-5-26-sp1	0	0.211483	8.51934	58.1205	19.3192	0.215975	11.1348				0.118243		97.8693	0.820678	0.820668	1526.58		-4.74511	0.0405032		5.55683	0.207079		1526.44	67.0628	1526.44	33.5314
	OIB data	Coogan et al. (2014 JP)	TO-010513-5-40-ol01	Low-Ti group	40.2893	0.0598968	0.003	0.0972086	10.7175	0.163465	48.0374	0.215097	0.0101462	0.377696	0.00226145	100	88.8754	88.8754	TO-010513-5-40-sp1	0	0.154775	8.65112	52.6331	24.8409	0.242449	8.91749				0.133128		95.8576	0.803201	0.80319	1467.45		-4.97282	0.0500862		5.74564	0.211922		1467.3	64.1946	1467.3	32.0973
	OIB data	Coogan et al. (2014 JP)	TO-010513-5-40-ol02	Low-Ti group	40.2833	0.0643482	0.003	0.103121	10.6783	0.162258	48.0722	0.219792	0.00946027	0.374261	0.00210822	100	88.9188	88.9188	TO-010513-5-40-sp1	0	0.154774	8.65112	52.6331	24.841	0.242453	8.91736				0.133138		95.8576	0.803201	0.803191	1487.15		-4.90113	0.0466213		5.68134	0.210235		1487	65.1335	1487	32.5667
	OIB data	Coogan et al. (2014 JP)	TO-010513-5-40-ol02	Low-Ti group	40.3568	0.0633687	0.003	0.0919597	10.6563	0.161155	48.0388	0.221093	0.00730746	0.372679	0.00227783	100	88.9323	88.9323	TO-010513-5-40-sp1	0	0.154774	8.65107	52.6328	24.841	0.242456	8.9177				0.133145		95.8576	0.803201	0.803191	1482.9		-4.91647	0.047342		5.69509	0.210588		1482.75	64.9281	1482.75	32.4641
	OIB data	Coogan et al. (2014 JP)	TO-010513-5-40-ol03	Low-Ti group	40.3527	0.0643436	0.003	0.0942211	10.5305	0.159991	48.1548	0.225299	0.0078265	0.376842	0.00364036	100	89.0721	89.0721	TO-010513-5-40-sp1	0	0.154774	8.65107	52.6328	24.8414	0.24246	8.91732				0.133132		95.8577	0.803201	0.803191	1487.13		-4.9012	0.0466247		5.6814	0.210237		1486.98	65.1326	1486.98	32.5663
	OIB data	Coogan et al. (2014 JP)	TO-010513-5-40-ol04	Low-Ti group	40.3192	0.0615097	0.003	0.093608	10.3858	0.157938	48.3383	0.212985	0.00958355	0.388235	0.00235606	100	89.2426	89.2426	TO-010513-5-40-sp1	0	0.154774	8.6511	52.6329	24.8419	0.242467	8.91663				0.133095		95.8576	0.803201	0.803191	1474.7		-4.94625	0.0487728		5.7218	0.211286		1474.55	64.5363	1474.55	32.2682
	OIB data	Coogan et al. (2014 JP)	TO-010513-5-6-ol02	Low-Ti group	40.9601	0.0715511	0.003	0.142607	7.27707	0.109906	50.7626	0.21547	0.00397289	0.42818	0.00208492	100	92.556	92.556	TO-010513-5-6-sp1	0	0.166053	9.66454	58.2135	17.4856	0.194932	12.1908				0.117366		98.2549	0.801615	0.801605	1486.28		-4.90581	0.0419281		5.68413	0.209496		1486.14	64.8407	1486.14	32.4203
	OIB data	Coogan et al. (2014 JP)	TO-010513-5-6-ol03	Low-Ti group	41.0088	0.0719724	0.003	0.112619	7.30966	0.107245	50.7362	0.197129	0.00551724	0.422122	0.00213467	100	92.5216	92.5216	TO-010513-5-6-sp1	0	0.166035	9.66482	58.2164	17.4866	0.194934	12.1864				0.117198		98.2546	0.801618	0.801608	1487.9		-4.89997	0.0416826		5.67889	0.209371		1487.76	64.9216	1487.76	32.4608
	OIB data	Coogan et al. (2014 JP)	TO-010513-5-6-ol04	Low-Ti group	40.9762	0.073024	0.003	0.133701	7.34999	0.109836	50.6948	0.207984	0.00562678	0.421163	0.00129802	100	92.4778	92.4778	TO-010513-5-6-sp1	0	0.166058	9.66494	58.217	17.4826	0.194877	12.1897				0.117359		98.2547	0.801618	0.801608	1491.94		-4.88547	0.0410824		5.66589	0.209063		1491.8	65.1241	1491.8	32.562
	OIB data	Coogan et al. (2014 JP)	TO-010513-5-6-ol05	Low-Ti group	41.0082	0.0739585	0.003	0.134863	7.29453	0.109406	50.7154	0.208408	0.00684537	0.421685	0.00175297	100	92.5331	92.5331	TO-010513-5-6-sp2	0	0.170898	9.5477	60.0061	17.8307	0.202837	11.2792				0.0967309		99.3857	0.808286	0.808276	1497.09		-4.86055	0.0405633		5.64943	0.208666		1496.94	65.3796	1496.94	32.6898
	OIB data	Coogan et al. (2014 JP)	TO-010513-5-6-ol06	Low-Ti group	41.064	0.0703184	0.003	0.171763	7.11988	0.106609	50.7931	0.217253	0.00395293	0.425364	0.00239977	100	92.7092	92.7092	TO-010513-5-6-sp2	0	0.17091	9.54764	60.0059	17.8299	0.202813	11.2796				0.0968323		99.3852	0.808287	0.808276	1483.02		-4.91102	0.0426631		5.6947	0.209739		1482.87	64.6751	1482.87	32.3375
	OIB data	Coogan et al. (2014 JP)	TO-010513-5-6-ol07	Low-Ti group	41.0122	0.070356	0.003	0.12538	7.09337	0.106558	50.9172	0.210751	0.00423805	0.431822	0.00142852	100	92.7508	92.7508	TO-010513-5-6-sp2	0	0.170922	9.54739	60.0042	17.8292	0.20281	11.282				0.0967364		99.3848	0.808286	0.808276	1483.17		-4.91046	0.0426403		5.69419	0.209727		1483.02	64.6828	1483.02	32.3414
	OIB data	Coogan et al. (2014 JP)	TO-010513-5-6-ol08	Low-Ti group	40.9802	0.0726281	0.003	0.143158	7.26248	0.109018	50.7598	0.21523	0.00329498	0.425107	0.00188324	100	92.5695	92.5695	TO-010513-5-6-sp2	0	0.170922	9.54757	60.0059	17.8262	0.20274	11.2837				0.0967309		99.3853	0.808288	0.808277	1492		-4.87869	0.0413064		5.6657	0.209047		1491.86	65.1234	1491.86	32.5617
	OIB data	Coogan et al. (2014 JP)	TO-010513-5-6-ol09	Low-Ti group	40.9935	0.0700293	0.003	0.128263	7.35311	0.109549	50.6849	0.206938	0.00549468	0.419284	0.00205671	100	92.4735	92.4735	TO-010513-5-6-sp3	0	0.154828	9.20934	60.1609	18.1968	0.199052	11.8643				0.10687		100.151	0.814205	0.814195	1490.27		-4.87906	0.0428392		5.67127	0.209343		1490.12	65.0877	1490.12	32.5439
	OIB data	Coogan et al. (2014 JP)	TO-010513-5-6-ol10	Low-Ti group	40.9898	0.0715388	0.003	0.132236	7.36609	0.110145	50.6717	0.206373	0.00699389	0.41683	0.00199599	100	92.4594	92.4594	TO-010513-5-6-sp3	0	0.154797	9.20911	60.16	18.2007	0.199228	11.8608				0.106755		100.15	0.814207	0.814197	1496.25		-4.85771	0.0419353		5.65211	0.208885		1496.1	65.3862	1496.1	32.6931
	OIB data	Coogan et al. (2014 JP)	TO-010513-5-6-ol11	Low-Ti group	41.0162	0.0708966	0.003	0.129511	7.37908	0.110128	50.6387	0.205124	0.00383044	0.419444	0.0012262	100	92.4425	92.4425	TO-010513-5-6-sp3	0	0.154821	9.20933	60.1609	18.1995	0.199129	11.8616				0.106781		100.151	0.814206	0.814196	1493.71		-4.86675	0.0423151		5.66022	0.209078		1493.56	65.2592	1493.56	32.6296
	OIB data	Coogan et al. (2014 JP)	TO-010513-5-6-ol12	Low-Ti group	40.9935	0.0732524	0.003	0.133607	7.45836	0.111858	50.5709	0.208123	0.00375081	0.419329	0.00200897	100	92.3581	92.3581	TO-010513-5-6-sp3	0	0.154844	9.20903	60.1592	18.2015	0.199142	11.8615				0.106771		100.151	0.814206	0.814196	1502.92		-4.83403	0.0409543		5.63087	0.208385		1502.77	65.7225	1502.77	32.8613
	OIB data	Coogan et al. (2014 JP)	TO-080514-1-31-ol06	Low-Ti group	41.1484	0.0740416	0.003	0.128961	6.81991	0.102888	51.0676	0.218615	0.00642809	0.407905	0.00209004	100	93.0299	93.0299	TO-080514-1-31-sp2	0	0.172946	11.7995	54.3101	17.7632	0.175762	10.4749				0.0850815		95.0447	0.755362	0.75535	1453.64		-5.07119	0.0405178		5.79158	0.211407		1453.49	63.0268	1453.49	31.5134
	OIB data	Coogan et al. (2014 JP)	TO-080514-1-31-ol08	Low-Ti group	41.194	0.076687	0.003	0.122615	6.75386	0.101887	51.0981	0.215769	0.00621247	0.40578	0.00236438	100	93.0965	93.0965	TO-080514-1-31-sp2	0	0.172971	11.7982	54.309	17.767	0.175806	10.4739				0.085364		95.0453	0.755379	0.755367	1463.11		-5.03597	0.0391201		5.76001	0.210668		1462.96	63.4969	1462.96	31.7484
	OIB data	Coogan et al. (2014 JP)	TO-080514-1-31-ol09	Low-Ti group	41.1436	0.0813315	0.003	0.141278	6.68321	0.100609	51.1852	0.223018	0.00947379	0.406644	0.00270091	100	93.1747	93.1747	TO-080514-1-31-sp3	0	0.119162	10.5727	60.222	18.8159	0.210816	9.75823				0.0568765		100.019	0.792577	0.792567	1499.49		-4.86749	0.0368861		5.64177	0.208106		1499.34	65.3813	1499.34	32.6906
	OIB data	Coogan et al. (2014 JP)	TO-080514-1-31-ol10	Low-Ti group	41.1088	0.0771953	0.003	0.13698	6.6564	0.101134	51.2567	0.218658	0.0101691	0.407391	0.00278943	100	93.209	93.209	TO-080514-1-31-sp3	0	0.119335	10.5734	60.2229	18.8098	0.210686	9.76169				0.0566169		100.018	0.792569	0.792558	1484.89		-4.91976	0.0388625		5.68864	0.209161		1484.74	64.6342	1484.74	32.3171
	OIB data	Coogan et al. (2014 JP)	TO-080514-1-31-ol12	Low-Ti group	41.1375	0.0861652	0.003	0.132981	6.62003	0.100138	51.2604	0.22188	0.00906169	0.404263	0.00304393	100	93.2441	93.2441	TO-080514-1-31-sp3	0	0.119274	10.5723	60.2184	18.8148	0.210764	9.76257				0.056828		100.018	0.792574	0.792563	1515.92		-4.80972	0.0348168		5.58995	0.206976		1515.78	66.2377	1515.78	33.1189
	OIB data	Coogan et al. (2014 JP)	TO-080514-2-18-ol03	Low-Ti group	41.1305	0.09306	0.003	0.108041	7.03897	0.0996329	50.9383	0.193373	0.0114054	0.362959	0.00223578	100	92.8051	92.8051	TO-080514-2-18-sp1	0	0.129649	11.8585	58.7121	16.8406	0.187804	13.1376				0.0842185		101.187	0.76859	0.768578	1511.86		-4.84756	0.0322373		5.60268	0.207025		1511.71	65.9523	1511.71	32.9761
	OIB data	Coogan et al. (2014 JP)	TO-080514-2-18-ol04	Low-Ti group	41.1473	0.0930898	0.003	0.106398	7.01487	0.10029	50.9425	0.195884	0.0118215	0.362169	0.00277661	100	92.8286	92.8286	TO-080514-2-18-sp1	0	0.129671	11.8583	58.7115	16.8399	0.187803	13.1392				0.0841061		101.187	0.768591	0.768579	1511.95		-4.84722	0.0322269		5.60238	0.207018		1511.81	65.9574	1511.81	32.9787
	OIB data	Coogan et al. (2014 JP)	TO-080514-2-19-ol01	Low-Ti group	40.9098	0.094407	0.003	0.151331	6.81018	0.108385	51.2437	0.223514	0.00771289	0.420897	0.00418118	100	93.0614	93.0614	TO-080514-2-19-sp1	0	0.197795	10.7943	59.503	16.4487	0.181397	13.7761				0.115894		101.273	0.787141	0.78713	1537.99		-4.73915	0.0317773		5.52184	0.205522		1537.84	67.4047	1537.84	33.7023
	OIB data	Coogan et al. (2014 JP)	TO-080514-2-19-ol02	Low-Ti group	40.9676	0.091015	0.003	0.163863	6.79777	0.108902	51.1859	0.223481	0.00666433	0.424257	0.00452789	100	93.0659	93.0659	TO-080514-2-19-sp1	0	0.197799	10.7936	59.4995	16.454	0.181493	13.7739				0.116137		101.273	0.787141	0.78713	1527.3		-4.77568	0.0329616		5.55461	0.2062		1527.16	66.8313	1527.16	33.4157
	OIB data	Coogan et al. (2014 JP)	TO-080514-2-20-ol02	Low-Ti group	40.8643	0.0789979	0.003	0.143338	7.28218	0.111527	50.8213	0.228793	0.00659478	0.434184	0.00244924	100	92.5592	92.5592	TO-080514-2-20-sp1	0	0.137066	7.71546	61.2808	16.8623	0.182073	12.3988				0.126193		98.9033	0.841976	0.841968	1568.97		-4.58156	0.0379757		5.42896	0.204534		1568.82	69.3958	1568.82	34.6979
	OIB data	Coogan et al. (2014 JP)	TO-080514-2-20-ol03	Low-Ti group	40.9396	0.0779223	0.003	0.133446	7.10233	0.108359	50.9556	0.221078	0.00614271	0.427277	0.00252728	100	92.7474	92.7474	TO-080514-2-20-sp1	0	0.137068	7.7155	61.2812	16.8626	0.182067	12.3981				0.126173		98.9034	0.841976	0.841968	1564.81		-4.59527	0.0384999		5.44126	0.204805		1564.66	69.1739	1564.66	34.587
	OIB data	Coogan et al. (2014 JP)	TO-080514-2-20-ol04	Low-Ti group	41.0185	0.0765512	0.003	0.138624	7.13002	0.108566	50.8536	0.220227	0.00454492	0.421694	0.0023039	100	92.7076	92.7076	TO-080514-2-20-sp1	0	0.137063	7.71543	61.281	16.8621	0.182068	12.399				0.126171		98.9034	0.841977	0.841968	1559.45		-4.61302	0.0391895		5.45718	0.20516		1559.3	68.8899	1559.3	34.445
	OIB data	Coogan et al. (2014 JP)	TO-080514-2-20-ol07	Low-Ti group	40.731	0.0809209	0.003	0.150798	7.18697	0.113853	51.0441	0.216547	0.0049696	0.441433	0.0032868	100	92.679	92.679	TO-080514-2-20-sp2	0	0.134517	7.43175	61.4565	17.7623	0.211428	11.5232				0.105882		98.8245	0.847268	0.84726	1586.27		-4.52004	0.0370733		5.37846	0.203584		1586.12	70.3766	1586.12	35.1883
	OIB data	Coogan et al. (2014 JP)	TO-080514-2-20-ol08	Low-Ti group	40.7873	0.0802364	0.003	0.158387	7.16006	0.112921	51.0072	0.216778	0.00623339	0.441252	0.00232757	100	92.6996	92.6996	TO-080514-2-20-sp2	0	0.134522	7.43184	61.4576	17.7621	0.211406	11.5223				0.105916		98.8246	0.847269	0.84726	1583.63		-4.52855	0.0373895		5.38609	0.203749		1583.48	70.234	1583.48	35.117
	OIB data	Coogan et al. (2014 JP)	TO-080514-2-20-ol09	Low-Ti group	40.7402	0.0795329	0.003	0.144931	7.17413	0.112743	51.0571	0.215241	0.00554761	0.441743	0.00253167	100	92.6929	92.6929	TO-080514-2-20-sp3	0	0.129944	7.73314	62.1486	17.718	0.196944	11.8427				0.112953		100.088	0.843537	0.843528	1569.86		-4.5771	0.0377202		5.42634	0.204446		1569.71	69.4328	1569.71	34.7164
	OIB data	Coogan et al. (2014 JP)	TO-080514-2-20-ol11	Low-Ti group	40.754	0.0847038	0.003	0.17536	7.16426	0.113094	51.0194	0.214455	0.00732237	0.439907	0.00199136	100	92.6972	92.6972	TO-080514-2-20-sp3	0	0.129917	7.733	62.1467	17.7184	0.196942	11.8443				0.112988		100.088	0.843535	0.843526	1589.26		-4.51409	0.0354175		5.36982	0.203235		1589.11	70.4823	1589.11	35.2412
	OIB data	Coogan et al. (2014 JP)	TO-080514-2-20-ol12	Low-Ti group	40.7699	0.0810403	0.003	0.160721	7.15648	0.113398	51.0301	0.211809	0.0047031	0.442083	0.00227461	100	92.706	92.706	TO-080514-2-20-sp3	0	0.129912	7.73334	62.1497	17.7185	0.196952	11.841				0.112961		100.089	0.843535	0.843527	1575.59		-4.55835	0.0370186		5.40952	0.20408		1575.44	69.7404	1575.44	34.8702
	OIB data	Coogan et al. (2014 JP)	TO-080514-2-20-ol13	Low-Ti group	40.8393	0.0792876	0.003	0.155483	7.15141	0.113155	50.9716	0.215085	0.00597461	0.44182	0.000689155	100	92.703	92.703	TO-080514-2-20-sp4	0	0.134175	7.79951	62.4832	15.4178	0.187379	13.0475				0.0916654		99.3665	0.843117	0.843108	1566.45		-4.58873	0.0378369		5.4364	0.204623		1566.3	69.2359	1566.3	34.6179
	OIB data	Coogan et al. (2014 JP)	TO-080514-2-20-ol15	Low-Ti group	40.8113	0.0753129	0.003	0.134906	7.13757	0.112983	51.0408	0.215389	0.00365726	0.439458	0.00236304	100	92.7253	92.7253	TO-080514-2-20-sp4	0	0.134176	7.79976	62.485	15.4172	0.187367	13.046				0.091594		99.3664	0.843116	0.843108	1550.96		-4.6402	0.0398338		5.48256	0.205651		1550.81	68.4168	1550.81	34.2084
	OIB data	Coogan et al. (2014 JP)	TO-080514-2-20-ol16	Low-Ti group	40.8214	0.0810083	0.003	0.144821	7.19465	0.112854	50.9645	0.210372	0.00279962	0.439791	0.00162576	100	92.6612	92.6612	TO-080514-2-20-sp4	0	0.13417	7.79956	62.4833	15.4171	0.187369	13.0482				0.0916097		99.3666	0.843116	0.843107	1572.99		-4.56727	0.0370333		5.41715	0.204204		1572.84	69.5861	1572.84	34.7931
	OIB data	Coogan et al. (2014 JP)	TO-080514-2-38-ol01	Low-Ti group	40.8512	0.079853	0.003	0.134519	7.16011	0.11264	50.9736	0.218834	0.00385056	0.437232	0.00189181	100	92.6951	92.6951	TO-080514-2-38-sp1	0	0.148156	9.15377	59.9751	15.915	0.178334	11.9792				0.110046		97.6796	0.814653	0.814643	1529.29		-4.74173	0.037569		5.54848	0.206541		1529.15	67.0901	1529.15	33.5451
	OIB data	Coogan et al. (2014 JP)	TO-080514-2-38-ol03	Low-Ti group	40.8831	0.0784947	0.003	0.137402	7.11363	0.111079	50.9955	0.212579	0.00221161	0.436755	0.0031736	100	92.7419	92.7419	TO-080514-2-38-sp1	0	0.148168	9.1539	59.9748	15.9149	0.178349	11.9798				0.10994		97.6799	0.81465	0.81464	1524.3		-4.7589	0.0382191		5.56388	0.206884		1524.16	66.8299	1524.16	33.415
	OIB data	Coogan et al. (2014 JP)	TO-080514-2-38-ol04	Low-Ti group	40.8407	0.0814761	0.003	0.14721	7.13431	0.112171	50.9958	0.219925	0.00606951	0.434904	0.00169173	100	92.7224	92.7224	TO-080514-2-38-sp1	0	0.148169	9.15374	59.9751	15.9136	0.178321	11.9808				0.109913		97.6798	0.814653	0.814643	1535.18		-4.72161	0.0368206		5.53043	0.206144		1535.03	67.399	1535.03	33.6995
	OIB data	Coogan et al. (2014 JP)	TO-080514-2-48-ol01	Low-Ti group	40.7565	0.0816751	0.003	0.14523	7.18397	0.112861	51.0252	0.217969	0.00556827	0.442116	0.00171579	100	92.6794	92.6794	TO-080514-2-48-sp1	0	0.148823	12.8755	52.7053	20.6005	0.193103	11.5225				0.150482		98.4834	0.73305	0.733037	1462.47		-5.06033	0.0367309		5.76212	0.210541		1462.32	63.4119	1462.32	31.706
	OIB data	Coogan et al. (2014 JP)	TO-080514-2-48-ol02	Low-Ti group	41.0678	0.0758	0.003	0.150222	6.74187	0.103311	51.2056	0.206462	0.00473787	0.414829	0.00378919	100	93.1214	93.1214	TO-080514-2-48-sp1	0	0.148823	12.8755	52.7052	20.6009	0.193108	11.5222				0.150478		98.4835	0.73305	0.733037	1442.53		-5.13498	0.0395778		5.82909	0.21208		1442.38	62.4164	1442.38	31.2082
	OIB data	Coogan et al. (2014 JP)	TO-080514-2-48-ol04	Low-Ti group	41.034	0.0797556	0.003	0.219494	6.75081	0.102828	51.1517	0.207841	0.00451708	0.418471	0.00391861	100	93.1062	93.1062	TO-080514-2-48-sp1	0	0.148823	12.8756	52.7055	20.6002	0.193095	11.5225				0.150479		98.4835	0.73305	0.733037	1456.06		-5.08412	0.0376149		5.78346	0.211024		1455.92	63.0894	1455.92	31.5447
	OIB data	Coogan et al. (2014 JP)	TO-080514-2-48-ol06	Low-Ti group	40.7156	0.0993407	0.003	0.127089	8.31633	0.124165	49.9692	0.219868	0.00611667	0.394256	0.00250108	100	91.4602	91.4602	TO-080514-2-48-sp2	0	0.148944	12.1372	53.468	21.5	0.201627	11.5363				0.15652		99.4315	0.74717	0.747158	1530.1		-4.80547	0.0301991		5.546	0.206017		1529.95	66.9797	1529.95	33.4898
	OIB data	Coogan et al. (2014 JP)	TO-080514-2-48-ol07	Low-Ti group	40.7292	0.0978137	0.003	0.145999	8.1733	0.122614	50.0681	0.227577	0.00951815	0.395705	0.00433359	100	91.6099	91.6099	TO-080514-2-48-sp2	0	0.148946	12.1372	53.4679	21.5009	0.201637	11.5356				0.156522		99.4316	0.74717	0.747158	1525.59		-4.82096	0.0306706		5.55989	0.206299		1525.45	66.7366	1525.45	33.3683
	OIB data	Coogan et al. (2014 JP)	TO-080514-2-48-ol08	Low-Ti group	40.6454	0.111378	0.003	0.143009	8.38052	0.124758	49.9416	0.221194	0.00748162	0.394938	0.00113135	100	91.3956	91.3956	TO-080514-2-48-sp2	0	0.148943	12.1372	53.4681	21.5002	0.20163	11.5361				0.156527		99.4316	0.747171	0.747158	1564.08		-4.6911	0.0269354		5.4434	0.203995		1563.94	68.846	1563.94	34.423
	OIB data	Coogan et al. (2014 JP)	TO-080514-3-13-ol02	Low-Ti group	40.5937	0.092855	0.003	0.151387	8.72063	0.130733	49.6602	0.219339	0.00749613	0.396175	0.00201724	100	91.0315	91.0315	TO-080514-3-13-sp1	0	0.120006	12.1627	55.7417	17.0943	0.177672	12.7668				0.135164		98.4506	0.754567	0.754555	1507.95		-4.87509	0.0323084		5.61498	0.207342		1507.8	65.7643	1507.8	32.8822
	OIB data	Coogan et al. (2014 JP)	TO-080514-3-13-ol03	Low-Ti group	40.6169	0.102132	0.003	0.149883	8.64621	0.128868	49.7032	0.217316	0.00809692	0.396923	0.0029016	100	91.1083	91.1083	TO-080514-3-13-sp1	0	0.120005	12.1623	55.7388	17.0966	0.177657	12.7677				0.135229		98.4507	0.754563	0.754551	1535.47		-4.77983	0.0293736		5.52953	0.205597		1535.32	67.242	1535.32	33.621
	OIB data	Coogan et al. (2014 JP)	TO-080514-3-13-ol04	Low-Ti group	40.632	0.101733	0.003	0.149316	8.45275	0.126478	49.8844	0.2193	0.00909678	0.396498	0.00239008	100	91.3188	91.3188	TO-080514-3-13-sp1	0	0.120022	12.1626	55.7402	17.0977	0.177701	12.7649				0.135199		98.4507	0.754563	0.754551	1534.31		-4.78377	0.029489		5.53307	0.205668		1534.17	67.1791	1534.17	33.5895
	OIB data	Coogan et al. (2014 JP)	TO-080514-3-20-ol01	Low-Ti group	40.6111	0.108867	0.003	0.139078	8.61891	0.128058	49.7389	0.222553	0.0073884	0.395317	0.0022227	100	91.1397	91.1397	TO-080514-3-20-sp1	0	0.157584	11.2718	57.8955	16.1332	0.178855	12.458				0.117927		98.4761	0.775058	0.775047	1571.28		-4.63994	0.0275567		5.42217	0.203522		1571.13	69.2255	1571.13	34.6128
	OIB data	Coogan et al. (2014 JP)	TO-080514-3-20-ol03	Low-Ti group	40.9114	0.105532	0.003	0.139836	7.12963	0.111355	50.9079	0.239636	0.00555008	0.421998	0.00165107	100	92.7152	92.7152	TO-080514-3-20-sp1	0	0.157575	11.2719	57.8969	16.1322	0.178832	12.4581				0.117653		98.4763	0.775062	0.775051	1561.83		-4.67105	0.0284274		5.45008	0.204063		1561.69	68.7002	1561.69	34.3501
	OIB data	Coogan et al. (2014 JP)	TO-080514-3-20-ol04	Low-Ti group	40.9558	0.104054	0.003	0.181648	7.02577	0.111901	50.9157	0.252166	0.00624686	0.419836	0.00285654	100	92.8147	92.8147	TO-080514-3-20-sp1	0	0.15756	11.271	57.892	16.1345	0.17891	12.4615				0.117785		98.4764	0.77506	0.775049	1557.61		-4.68508	0.0288312		5.46266	0.204309		1557.46	68.4667	1557.46	34.2333
	OIB data	Coogan et al. (2014 JP)	TO-080514-3-4-ol02	Low-Ti group	40.82	0.0805464	0.003	0.125819	7.27202	0.113912	50.9447	0.181457	0.00707226	0.426678	0.00360066	100	92.5854	92.5854	TO-080514-3-4-sp1	0	0.13203	8.40061	60.2231	15.6154	0.187009	12.9746				0.115477		97.8593	0.827857	0.827848	1553.35		-4.64723	0.0372456		5.47538	0.205244		1553.21	68.461	1553.21	34.2305
	OIB data	Coogan et al. (2014 JP)	TO-080514-3-4-ol03	Low-Ti group	40.7668	0.0800349	0.003	0.133634	7.30044	0.114418	50.9525	0.188618	0.0072099	0.428086	0.00424767	100	92.5597	92.5597	TO-080514-3-4-sp1	0	0.132025	8.40056	60.2228	15.6152	0.186995	12.9751				0.115514		97.8593	0.827857	0.827848	1551.45		-4.65359	0.0374837		5.48109	0.205369		1551.3	68.36	1551.3	34.18
	OIB data	Coogan et al. (2014 JP)	TO-080514-3-7-ol01	Low-Ti group	41.0581	0.0972421	0.003	0.157001	6.83187	0.105695	51.077	0.22306	0.00755235	0.414503	0.00144327	100	93.0197	93.0197	TO-080514-3-7-sp1	0	0.169598	10.3213	59.2284	15.7301	0.172683	13.4666				0.117978		99.3927	0.793795	0.793785	1558.16		-4.66476	0.0308508		5.461	0.204389		1558.02	68.5352	1558.02	34.2676
	OIB data	Coogan et al. (2014 JP)	TO-080514-3-7-ol02	Low-Ti group	41.1054	0.0980676	0.003	0.143485	6.89308	0.105953	50.9767	0.222805	0.00557779	0.419868	0.00125936	100	92.9487	92.9487	TO-080514-3-7-sp1	0	0.169597	10.3215	59.2294	15.7292	0.172668	13.4663				0.117907		99.3926	0.793796	0.793785	1560.71		-4.65632	0.0305911		5.45343	0.204237		1560.56	68.6745	1560.56	34.3373
	OIB data	Coogan et al. (2014 JP)	TO-080514-3-7-ol03	Low-Ti group	41.0435	0.101743	0.003	0.14992	6.85597	0.106265	51.0629	0.224374	0.00598755	0.42112	0.00132633	100	92.995	92.995	TO-080514-3-7-sp1	0	0.169593	10.3213	59.2291	15.7296	0.172657	13.4665				0.117898		99.3926	0.793797	0.793786	1571.87		-4.61952	0.0294861		5.42042	0.203583		1571.73	69.291	1571.73	34.6455
	OIB data	Coogan et al. (2014 JP)	TO-080514-3-8-ol01	Low-Ti group	41.0367	0.0707644	0.003	0.125092	6.44449	0.100589	51.5386	0.214914	0.00538053	0.435271	0.00414717	100	93.4446	93.4446	TO-080514-3-8-sp1	0	0.142016	10.4097	54.3793	23.5616	0.246602	9.43537				0.082904		98.6426	0.777993	0.777981	1469.22		-4.99114	0.0423942		5.73979	0.210663		1469.07	63.9435	1469.07	31.9717
	OIB data	Coogan et al. (2014 JP)	TO-080514-3-8-ol02	Low-Ti group	40.9971	0.0707641	0.003	0.150901	6.43205	0.099388	51.5708	0.217331	0.00630784	0.427309	0.00358783	100	93.4603	93.4603	TO-080514-3-8-sp1	0	0.142039	10.4092	54.3802	23.5607	0.246543	9.43734				0.0828797		98.6438	0.778004	0.777993	1469.23		-4.9911	0.0423944		5.73976	0.210662		1469.08	63.944	1469.08	31.972
	OIB data	Coogan et al. (2014 JP)	TO-080514-3-8-ol03	Low-Ti group	41.0333	0.0706717	0.003	0.150757	6.44961	0.100963	51.5257	0.212591	0.0068195	0.422899	0.00432355	100	93.4382	93.4382	TO-080514-3-8-sp1	0	0.142059	10.4112	54.3875	23.5592	0.246519	9.42897				0.0828163		98.6432	0.777995	0.777984	1468.83		-4.99259	0.0424498		5.74109	0.210693		1468.68	63.9237	1468.68	31.9619
	OIB data	Coogan et al. (2014 JP)	TO-080514-3-8-ol04	Low-Ti group	41.0423	0.0782638	0.003	0.218839	6.36346	0.0996023	51.5219	0.214644	0.00668384	0.425776	0.00406544	100	93.5198	93.5198	TO-080514-3-8-sp1	0	0.142033	10.4102	54.3833	23.5634	0.246664	9.42931				0.0830914		98.6429	0.777997	0.777986	1497.07		-4.89046	0.0383319		5.64948	0.20855		1496.92	65.3422	1496.92	32.6711
	OIB data	Coogan et al. (2014 JP)	TO-080514-3-9-ol03	Low-Ti group	41.088	0.0889741	0.003	0.177513	6.32552	0.101265	51.5441	0.206401	0.0089017	0.432595	0.00105987	100	93.5585	93.5585	TO-080514-3-9-sp1	0	0.146652	10.7281	54.3919	23.72	0.242559	9.29026				0.0897531		98.9732	0.772788	0.772776	1526.59		-4.79227	0.0337177		5.5568	0.206438		1526.45	66.8559	1526.45	33.4279
	OIB data	Coogan et al. (2014 JP)	TO-080514-3-9-ol04	Low-Ti group	41.1199	0.0891577	0.003	0.154395	6.29963	0.10191	51.5603	0.205131	0.00798142	0.433311	0.00186793	100	93.5851	93.5851	TO-080514-3-9-sp1	0	0.146621	10.7275	54.3901	23.7204	0.242656	9.29183				0.0897811		98.973	0.772791	0.772779	1527.21		-4.79016	0.0336482		5.55491	0.206398		1527.06	66.8885	1527.06	33.4443
	OIB data	Coogan et al. (2014 JP)	TO-080614-5-11-ol10	Low-Ti group	41.166	0.0849666	0.003	0.136166	5.82581	0.0941832	51.9893	0.211599	0.00585566	0.457316	0.00364292	100	94.0851	94.0851	TO-080614-5-11-sp3	0	0.17031	10.7484	58.6034	21.1424	0.227735	14.5145				0.117426		105.781	0.785297	0.785286	1509.24		-4.84025	0.035308		5.6109	0.207436		1509.1	65.8901	1509.1	32.945
	OIB data	Coogan et al. (2014 JP)	TO-080614-5-11-ol12	Low-Ti group	41.3336	0.090766	0.003	0.131306	5.68994	0.0924423	51.9744	0.206521	0.00855768	0.442392	0.00501507	100	94.2135	94.2135	TO-080614-5-11-sp3	0	0.170306	10.7501	58.6106	21.1279	0.22745	14.5231				0.116211		105.782	0.785291	0.785279	1528.21		-4.77438	0.033052		5.55181	0.206179		1528.06	66.8923	1528.06	33.4462
	OIB data	Coogan et al. (2014 JP)	TO-080614-5-20-ol01	Low-Ti group	41.3691	0.0892239	0.003	0.129209	5.70415	0.0925269	51.9255	0.206355	0.00967011	0.444893	0.00524994	100	94.1947	94.1947	TO-080614-5-20-sp1	0	0.303992	9.99709	59.258	18.4741	0.183414	12.5401				0.108805		101.098	0.799051	0.79904	1540.49		-4.7189	0.0336233		5.51421	0.205552		1540.35	67.6015	1540.35	33.8007
	OIB data	Coogan et al. (2014 JP)	TO-080614-5-20-ol02	Low-Ti group	41.3031	0.0893892	0.003	0.136186	5.72584	0.092656	51.9571	0.210708	0.00828738	0.447581	0.00450798	100	94.1773	94.1773	TO-080614-5-20-sp1	0	0.303993	9.99649	59.2548	18.4746	0.183426	12.543				0.108888		101.098	0.799052	0.799041	1541.06		-4.71699	0.0335611		5.51249	0.205517		1540.91	67.6318	1540.91	33.8159
	OIB data	Coogan et al. (2014 JP)	TO-080614-5-20-ol04	Low-Ti group	40.725	0.0976183	0.003	0.152606	8.21807	0.129566	49.956	0.26024	0.00617175	0.422963	0.00443321	100	91.5505	91.5505	TO-080614-5-20-sp1	0	0.30404	9.99655	59.2543	18.48	0.183541	12.537				0.109406		101.097	0.79905	0.799039	1567.43		-4.62893	0.0307319		5.4335	0.203903		1567.28	69.0659	1567.28	34.5329
	OIB data	Coogan et al. (2014 JP)	TO-080614-5-3-ol01	Low-Ti group	40.6901	0.0986931	0.003	0.163226	8.18562	0.130169	50.0188	0.253635	0.00795564	0.420367	0.00338788	100	91.5908	91.5908	TO-080614-5-3-sp1	0	0.245403	9.73867	55.0531	24.2399	0.242673	9.32816				0.118633		99.2687	0.79133	0.791319	1581.11		-4.59185	0.0303973		5.39341	0.203282		1580.96	69.8829	1580.96	34.9415
	OIB data	Coogan et al. (2014 JP)	TO-080614-5-3-ol02	Low-Ti group	40.7226	0.0992239	0.003	0.16015	8.21722	0.129794	49.9489	0.257566	0.00988868	0.422818	0.00347935	100	91.5502	91.5502	TO-080614-5-3-sp1	0	0.245429	9.73926	55.0554	24.2418	0.242702	9.32321				0.118619		99.2687	0.791327	0.791316	1582.75		-4.58654	0.0302347		5.38865	0.203187		1582.6	69.9739	1582.6	34.987
	OIB data	Coogan et al. (2014 JP)	TO-080614-5-3-ol03	Low-Ti group	40.6251	0.0932244	0.003	0.159945	8.39031	0.1339	49.8593	0.261707	0.00750482	0.435089	0.00370597	100	91.3734	91.3734	TO-080614-5-3-sp1	0	0.245389	9.73922	55.056	24.2372	0.242608	9.32714				0.118398		99.2683	0.791329	0.791318	1563.68		-4.64891	0.0321804		5.44459	0.20431		1563.53	68.9223	1563.53	34.4611
	OIB data	Coogan et al. (2014 JP)	TO-080614-5-46-ol03	Low-Ti group	40.7616	0.0848522	0.003	0.16076	8.16495	0.128626	49.9914	0.25347	0.00578833	0.41725	0.00354333	100	91.606	91.606	TO-080614-5-46-sp1	0	0.227424	10.5129	58.3945	20.7015	0.216232	10.0307				0.107388		100.431	0.788413	0.788402	1514.31		-4.81945	0.0353556		5.59499	0.207162		1514.16	66.1775	1514.16	33.0888
	OIB data	Coogan et al. (2014 JP)	TO-080614-5-46-ol04	Low-Ti group	40.7854	0.0831687	0.003	0.131702	8.11682	0.127528	50.0461	0.255908	0.00562528	0.415622	0.00363345	100	91.6597	91.6597	TO-080614-5-46-sp1	0	0.227402	10.5128	58.3937	20.7014	0.216246	10.0321				0.107508		100.431	0.788412	0.788401	1508.59		-4.83948	0.0360713		5.61296	0.207552		1508.44	65.8786	1508.44	32.9393
	OIB data	Coogan et al. (2014 JP)	TO-080614-5-5-ol01	Low-Ti group	40.7367	0.0892692	0.003	0.162587	8.11149	0.127351	50.0735	0.246753	0.00632623	0.414331	0.0033292	100	91.6689	91.6689	TO-080614-5-5-sp1	0	0.287552	13.9922	51.5556	24.8195	0.218479	12.051				0.159868		103.419	0.711961	0.711947	1469.66		-5.0546	0.0336062		5.73834	0.2099		1469.52	63.7442	1469.52	31.8721
	OIB data	Coogan et al. (2014 JP)	TO-080614-5-5-ol04	Low-Ti group	40.7514	0.0882971	0.003	0.171797	8.12826	0.128436	50.0321	0.247236	0.00716068	0.413715	0.00331572	100	91.6468	91.6468	TO-080614-5-5-sp1	0	0.287579	13.9928	51.5572	24.819	0.218442	12.0501				0.16005		103.42	0.711958	0.711945	1466.67		-5.06559	0.0339762		5.7482	0.210113		1466.53	63.5903	1466.53	31.7951
	OIB data	Coogan et al. (2014 JP)	TO6-35SP1-1	High-Ti group	40.2107	0.043293	0.003	0.107905	11.2808	0.182346	47.4664	0.302576	0.00316316	0.358508	0.00375625	100	88.2352	88.2352	TO6-35SP1	-2.79171e-17	0.745966	11.8453	49.9426	24.6677	0.275124	10.0124				0.151177		97.9705	0.738794	0.738782	1323.99		-5.61169	0.0692953		6.26177	0.225386		1323.84	57.482	1323.84	28.741
	OIB data	Coogan et al. (2014 JP)	TO6-35SP1-3	High-Ti group	40.1836	0.0373535	0.003	0.0859816	11.2976	0.182089	47.4941	0.301474	0.00512475	0.355646	0.0160641	100	88.2258	88.2258	TO6-35SP1	-2.79171e-17	0.745966	11.8453	49.9426	24.6677	0.275124	10.0124				0.151177		97.9705	0.738794	0.738782	1290.93		-5.75926	0.0803137		6.39414	0.230594		1290.78	56.4008	1290.78	28.2004
	OIB data	Coogan et al. (2014 JP)	TO6-54SP1-1	High-Ti group	40.1595	0.062977	0.003	0.116892	11.3767	0.182866	47.4369	0.248932	0.00548611	0.369046	0.00303695	100	88.1406	88.1406	TO6-54SP1	0	0.243959	12.871	51.2377	23.4404	0.291466	10.1944				0.133289		98.7655	0.727558	0.727545	1396.4		-5.31996	0.0476364		5.99015	0.216188		1396.26	60.2498	1396.26	30.1249
	OIB data	Coogan et al. (2014 JP)	TO6-54SP1-3	High-Ti group	40.1976	0.0613549	0.003	0.108215	11.301	0.18114	47.4867	0.246967	0.00401333	0.372102	0.00371967	100	88.2211	88.2211	TO6-54SP1	0	0.243959	12.871	51.2377	23.4404	0.291466	10.1944				0.133289		98.7655	0.727558	0.727545	1389.91		-5.34606	0.0488958		6.01356	0.216816		1389.76	59.9553	1389.76	29.9776
	OIB data	Coogan et al. (2014 JP)	TO-010513-8-11-ol01	High-Ti group	40.0689	0.0495661	0.003	0.0861592	11.3456	0.178737	47.5747	0.286215	0.00931851	0.357483	0.00403982	100	88.1994	88.1994	TO-010513-8-11-sp1	0	0.957333	12.6415	51.151	19.009	0.177389	13.9349				0.198196		98.2698	0.730775	0.730762	1342.07		-5.54144	0.0605253		6.19166	0.222196		1341.92	57.9591	1341.92	28.9796
	OIB data	Coogan et al. (2014 JP)	TO-010513-8-11-ol02	High-Ti group	40.1643	0.0558636	0.003	0.119263	11.3655	0.180175	47.3999	0.31156	0.00794301	0.354483	0.00451184	100	88.1427	88.1427	TO-010513-8-11-sp1	0	0.957375	12.6416	51.1512	19.0089	0.177388	13.9347				0.198186		98.2698	0.730776	0.730763	1370.55		-5.42183	0.0537023		6.08438	0.218917		1370.4	59.1352	1370.4	29.5676
	OIB data	Coogan et al. (2014 JP)	TO5-35SP1-1	High-Ti group	41.1241	0.0724919	0.003	0.136173	6.44143	0.106183	51.4478	0.214507	0.00345026	0.421079	0.00256305	100	93.4367	93.4367	TO5-35SP1	0	0.214661	10.6935	60.0607	15.5311	0.219438	13.0684				0.143207		100.154	0.790258	0.790247	1465.18		-4.99392	0.0413839		5.75312	0.210627		1465.04	63.6365	1465.04	31.8183
	OIB data	Coogan et al. (2014 JP)	TO5-35SP1-2	High-Ti group	41.1226	0.0724449	0.003	0.145386	6.3876	0.105529	51.4882	0.216959	0.00442774	0.421681	0.00432935	100	93.4928	93.4928	TO5-35SP1	0	0.214665	10.6929	60.0568	15.532	0.219447	13.0662				0.143178		100.148	0.790257	0.790246	1465.02		-4.99451	0.0414108		5.75365	0.21064		1464.88	63.6287	1464.88	31.8144
	OIB data	Coogan et al. (2014 JP)	TO5-35SP1-3	High-Ti group	41.2078	0.0760263	0.003	0.145188	6.27528	0.10365	51.5142	0.218433	0.00432345	0.421602	0.00294781	100	93.6029	93.6029	TO5-35SP1	0	0.214638	10.6916	60.0501	15.5344	0.219492	13.0674				0.143194		100.144	0.790259	0.790248	1478.23		-4.94613	0.03946		5.71026	0.209623		1478.08	64.2875	1478.08	32.1437
	OIB data	Coogan et al. (2014 JP)	TO6-35SP1-2	High-Ti group	40.5233	0.0320904	0.003	0.089472	11.2742	0.182498	47.1847	0.306972	0.00511948	0.356075	0.0093529	100	88.1795	88.1795	TO6-35SP1	-2.79171e-17	0.745966	11.8453	49.9426	24.6677	0.275124	10.0124				0.151177		97.9705	0.738794	0.738782	1258.31		-5.91113	0.093486		6.53036	0.236904		1258.16	55.5518	1258.16	27.7759
	OIB data	Coogan et al. (2014 JP)	TO-010513-5-51-ol01	High-Ti group	40.7352	0.0677599	0.003	0.156827	8.20505	0.123451	50.0403	0.208721	0.00661659	0.422191	0.00271275	100	91.5758	91.5758	TO-010513-5-51-sp1	0	0.246295	11.555	55.2745	18.6917	0.185708	12.718				0.135542		99.0218	0.762414	0.762402	1433.9		-5.1389	0.044274		5.85856	0.213075		1433.75	62.08	1433.75	31.04
	OIB data	Coogan et al. (2014 JP)	TO-010513-5-51-ol04	High-Ti group	40.7089	0.0719352	0.003	0.112309	8.24205	0.124059	50.058	0.213881	0.00585583	0.428303	0.0034127	100	91.5438	91.5438	TO-010513-5-51-sp1	0	0.246295	11.555	55.2746	18.6916	0.185703	12.718				0.135526		99.0217	0.762415	0.762403	1449.67		-5.0791	0.0417042		5.80492	0.211758		1449.53	62.8416	1449.53	31.4208
	OIB data	Coogan et al. (2014 JP)	TO-010513-5-6-ol01	High-Ti group	40.7461	0.0699189	0.003	0.111698	8.23297	0.12481	50.0608	0.18722	0.00669445	0.427164	0.00239732	100	91.5527	91.5527	TO-010513-5-6-sp1	0	0.16607	9.66508	58.2177	17.4822	0.194855	12.1892				0.117278		98.2546	0.801618	0.801607	1479.88		-4.92894	0.0429069		5.70488	0.209994		1479.74	64.5229	1479.74	32.2614
	OIB data	Coogan et al. (2014 JP)	TO-010513-8-11-ol03	High-Ti group	40.1986	0.0343802	0.003	0.0822445	11.297	0.179019	47.5128	0.298968	0.00787922	0.352998	0.00263939	100	88.2305	88.2305	TO-010513-8-11-sp1	0	0.957376	12.6416	51.1512	19.0089	0.177383	13.9348				0.198192		98.2699	0.730776	0.730763	1260.78		-5.90727	0.0872596		6.51981	0.234878		1260.64	55.2551	1260.64	27.6276
	OIB data	Coogan et al. (2014 JP)	TO-010513-8-11-ol04	High-Ti group	40.2697	0.0335852	0.003	0.0851357	11.2903	0.177863	47.4488	0.300629	0.0077442	0.351484	0.00268506	100	88.2227	88.2227	TO-010513-8-11-sp1	0	0.957331	12.6416	51.1513	19.0087	0.177385	13.9348				0.198172		98.2697	0.730775	0.730762	1255.86		-5.93066	0.0893249		6.5408	0.235869		1255.72	55.1328	1255.72	27.5664
	OIB data	Coogan et al. (2014 JP)	TO-080514-1-31-ol02	High-Ti group	40.9854	0.0732549	0.003	0.106598	6.68661	0.105639	51.3871	0.185394	0.00416558	0.433097	0.00289713	100	93.1964	93.1964	TO-080514-1-31-sp1	0	0.148017	10.6693	57.8904	18.2123	0.202653	12.474				0.084805		99.9493	0.784477	0.784466	1470.19		-4.98118	0.0409529		5.73658	0.21033		1470.05	63.9139	1470.05	31.9569
	OIB data	Coogan et al. (2014 JP)	TO-080514-1-31-ol03	High-Ti group	40.9915	0.0748328	0.003	0.108568	6.69763	0.107314	51.3514	0.200572	0.00475167	0.430749	0.00352415	100	93.1816	93.1816	TO-080514-1-31-sp1	0	0.148012	10.6699	57.893	18.2139	0.202629	12.4685				0.0847466		99.9485	0.784474	0.784463	1476.01		-4.95993	0.0400894		5.71752	0.209882		1475.86	64.2037	1475.86	32.1018
	OIB data	Coogan et al. (2014 JP)	TO-010513-5-68-ol01	High-Ti group	40.9783	0.0725789	0.003	0.134628	7.41515	0.111791	50.6221	0.211605	0.00646257	0.418921	0.00220182	100	92.4061	92.4061	TO-010513-5-68-sp1	0	0.517703	14.2917	55.0308	15.6712	0.170116	14.2122				0.105991		100.251	0.720911	0.720897	1407.41		-5.28276	0.0413343		5.95091	0.214527		1407.27	60.5781	1407.27	30.289
	OIB data	Coogan et al. (2014 JP)	TO-010513-5-68-ol01	High-Ti group	41.125	0.0657686	0.003	0.150361	6.31975	0.100981	51.558	0.216391	0.00740569	0.428836	0.00259818	100	93.5656	93.5656	TO-010513-5-68-sp1	0	0.517698	14.2915	55.0302	15.671	0.170117	14.2131				0.105999		100.251	0.720911	0.720898	1382.82		-5.38128	0.0456145		6.03928	0.216744		1382.68	59.426	1382.68	29.713
	OIB data	Coogan et al. (2014 JP)	TO-010513-5-68-ol02	High-Ti group	41.2755	0.0657517	0.003	0.127393	6.33503	0.100307	51.4168	0.222075	0.00562759	0.427674	0.00220996	100	93.5345	93.5345	TO-010513-5-68-sp1	0	0.517702	14.2917	55.0309	15.6706	0.170104	14.2127				0.10598		100.251	0.720911	0.720898	1382.76		-5.38155	0.0456262		6.03952	0.21675		1382.61	59.4229	1382.61	29.7115
	OIB data	Coogan et al. (2014 JP)	TO-010513-5-68-ol03	High-Ti group	41.1008	0.0722581	0.003	0.15452	6.52034	0.104825	51.3733	0.208987	0.00527442	0.43235	0.00265104	100	93.3527	93.3527	TO-010513-5-68-sp1	0	0.517701	14.2917	55.0311	15.6705	0.170102	14.2126				0.105958		100.251	0.720911	0.720898	1406.29		-5.28719	0.0415179		5.95489	0.214624		1406.14	60.5245	1406.14	30.2622
	OIB data	Coogan et al. (2014 JP)	TO-010513-6-35-ol02	High-Ti group	41.0603	0.0632791	0.003	0.12462	6.57387	0.105703	51.363	0.234299	0.00527766	0.43879	0.00340004	100	93.3005	93.3005	TO-010513-6-35-sp1	0	0.562069	12.3227	50.6431	24.1153	0.252283	10.1719				0.125122		98.555	0.733826	0.733813	1407		-5.27165	0.047409		5.95236	0.215446		1406.86	60.808	1406.86	30.404
	OIB data	Coogan et al. (2014 JP)	TO-080514-1-7-ol01	High-Ti group	41.1683	0.0852116	0.003	0.147951	6.57716	0.0996894	51.26	0.220426	0.00984171	0.404911	0.00305352	100	93.2848	93.2848	TO-080514-1-7-sp1	0	0.803573	7.62554	52.915	25.8862	0.246729	9.81125				0.170553		97.7017	0.823167	0.823157	1601.8		-4.49412	0.0352065		5.3339	0.202774		1601.65	71.2727	1601.65	35.6364
	OIB data	Coogan et al. (2014 JP)	TO-080514-1-7-ol02	High-Ti group	41.1541	0.0810881	0.003	0.130376	6.55198	0.0990537	51.3282	0.221098	0.00731265	0.401053	0.00218859	100	93.3171	93.3171	TO-080514-1-7-sp1	0	0.803578	7.62554	52.915	25.8861	0.246728	9.81122				0.170548		97.7016	0.823167	0.823157	1586.29		-4.54372	0.0369968		5.37839	0.203719		1586.14	70.4251	1586.14	35.2126
	OIB data	Coogan et al. (2014 JP)	TO-080514-1-7-ol04	High-Ti group	41.1529	0.0822704	0.003	0.138795	6.74692	0.101381	51.1085	0.226648	0.00908006	0.404914	0.00295064	100	93.1044	93.1044	TO-080514-1-7-sp1	0	0.803577	7.62555	52.9151	25.8862	0.246728	9.81111				0.170546		97.7016	0.823167	0.823157	1590.79		-4.52925	0.0364651		5.36541	0.203441		1590.64	70.6695	1590.64	35.3348
	OIB data	Coogan et al. (2014 JP)	TO-080514-2-12-ol02	High-Ti group	40.49	0.0511414	0.003	0.0850852	9.57703	0.150403	48.9401	0.260633	0.00282941	0.403831	0.00362324	100	90.1074	90.1074	TO-080514-2-12-sp1	0	0.30998	12.3597	54.6704	17.9385	0.182004	12.5245				0.140135		98.3685	0.747939	0.747926	1350.76		-5.4876	0.0586609		6.15855	0.221061		1350.61	58.285	1350.61	29.1425
	OIB data	Coogan et al. (2014 JP)	TO-080514-2-12-ol03	High-Ti group	40.4681	0.0523739	0.003	0.0983676	9.57605	0.149367	48.9496	0.258992	0.00440056	0.404348	0.00319219	100	90.11	90.11	TO-080514-2-12-sp1	0	0.309982	12.3597	54.6708	17.9384	0.182	12.5242				0.140161		98.3684	0.74794	0.747928	1356.41		-5.46379	0.0572804		6.13718	0.220401		1356.26	58.516	1356.26	29.258
	OIB data	Coogan et al. (2014 JP)	TO-080514-2-12-ol04	High-Ti group	40.4729	0.0506419	0.003	0.085925	9.56973	0.150536	48.9653	0.258742	0.00355585	0.40432	0.00359117	100	90.1187	90.1187	TO-080514-2-12-sp1	0	0.309983	12.3596	54.6701	17.9393	0.182014	12.5241				0.140173		98.3685	0.747939	0.747927	1348.44		-5.49741	0.0592395		6.16734	0.221338		1348.29	58.1915	1348.29	29.0957
	OIB data	Coogan et al. (2014 JP)	TO-080614-4-20-ol01	High-Ti group	41.1525	0.0873408	0.003	0.173983	6.29682	0.100485	51.5124	0.210194	0.00715654	0.432812	0.00149058	100	93.5822	93.5822	TO-080614-4-20-sp1	0	1.39922	13.9331	51.8157	30.1576	0.307877	7.28798				0.14721		105.501	0.713857	0.713844	1464.37		-5.0722	0.0343482		5.7558	0.210274		1464.23	63.4706	1464.23	31.7353
	OIB data	Coogan et al. (2014 JP)	TO-080614-4-20-ol02	High-Ti group	40.4661	0.0675259	0.003	0.110429	10.4773	0.160396	48.087	0.227251	0.00663007	0.367779	0.00230045	100	89.1076	89.1076	TO-080614-4-20-sp1	0	1.3997	13.9401	51.8462	30.1538	0.30747	7.25235				0.147368		105.5	0.713875	0.713861	1397.26		-5.33001	0.0444274		5.98708	0.215708		1397.11	60.1779	1397.11	30.089
	OIB data	Coogan et al. (2014 JP)	TO-080614-4-4-ol01	High-Ti group	40.4222	0.0702934	0.003	0.094117	10.4566	0.159195	48.1732	0.22618	0.00576644	0.363524	0.00216668	100	89.1442	89.1442	TO-080614-4-4-sp1	0	1.02729	9.64833	52.3973	23.5656	0.223434	11.5033				0.167208		98.7842	0.784627	0.784616	1486.47		-4.92186	0.0426782		5.68351	0.209734		1486.33	64.9285	1486.33	32.4642
	OIB data	Coogan et al. (2014 JP)	TO-080614-4-4-ol02	High-Ti group	41.2054	0.0809174	0.003	0.143522	6.29189	0.101778	51.4975	0.217055	0.00417896	0.428901	0.00155616	100	93.5851	93.5851	TO-080614-4-4-sp1	0	1.02729	9.64839	52.3977	23.5654	0.223427	11.503				0.167188		98.7842	0.784627	0.784616	1526.44		-4.78112	0.0370749		5.55726	0.206822		1526.3	66.969	1526.3	33.4845
	OIB data	Coogan et al. (2014 JP)	TO-080614-4-4-ol04	High-Ti group	41.1267	0.0789981	0.003	0.151099	6.37503	0.102243	51.4779	0.221775	0.00549638	0.4309	0.00200299	100	93.5036	93.5036	TO-080614-4-4-sp1	0	1.02728	9.64831	52.3972	23.566	0.223443	11.5029				0.167231		98.7841	0.784627	0.784616	1519.5		-4.80511	0.0379756		5.57879	0.2073		1519.35	66.607	1519.35	33.3035
	OIB data	Coogan et al. (2014 JP)	TO-080614-4-40-ol02	High-Ti group	41.1717	0.0782843	0.003	0.147855	6.3084	0.0996275	51.5106	0.220258	0.00486317	0.429538	0.00162009	100	93.5709	93.5709	TO-080614-4-40-sp1	0	1.2007	9.84853	48.5222	29.3599	0.281982	9.72409				0.169174		99.3932	0.767717	0.767705	1515.78		-4.83473	0.0383219		5.5904	0.207664		1515.63	66.447	1515.63	33.2235
	OIB data	Coogan et al. (2014 JP)	TO-080614-4-40-ol04	High-Ti group	40.2234	0.0434554	0.003	0.13232	10.5279	0.168834	48.0952	0.351685	0.00822479	0.396736	0.0171718	100	89.0624	89.0624	TO-080614-4-40-sp1	0	1.20069	9.84844	48.5216	29.3607	0.282	9.72396				0.169218		99.3931	0.767716	0.767705	1361.42		-5.42333	0.0690362		6.11838	0.222601		1361.27	59.4641	1361.27	29.7321
	OIB data	Coogan et al. (2014 JP)	TO-080614-4-40-ol04	High-Ti group	40.3377	0.0466884	0.003	0.122574	10.3385	0.165926	48.1996	0.345515	0.0100617	0.389673	0.00914883	100	89.2589	89.2589	TO-080614-4-40-sp1	0	1.20068	9.84841	48.5214	29.3606	0.281998	9.72415				0.169201		99.393	0.767716	0.767705	1378.8		-5.35157	0.0642558		6.05401	0.220353		1378.65	60.1219	1378.65	30.0609
	OIB data	Coogan et al. (2014 JP)	TO-080614-4-8-ol01	High-Ti group	40.3902	0.0439541	0.003	0.12128	10.2505	0.163816	48.2469	0.345169	0.0107852	0.38787	0.0051079	100	89.3498	89.3498	TO-080614-4-8-sp1	0	0.805423	10.3578	53.8336	24.0077	0.241966	11.0493				0.152478		100.711	0.777114	0.777102	1349.93		-5.46235	0.068253		6.16168	0.223063		1349.78	58.7528	1349.78	29.3764
	OIB data	Coogan et al. (2014 JP)	TO-080614-4-8-ol04	High-Ti group	40.1903	0.0460462	0.003	0.12173	11.1849	0.178415	47.4695	0.345688	0.00927648	0.383803	0.0291171	100	88.3242	88.3242	TO-080614-4-8-sp1	0	0.805408	10.3577	53.8339	24.0019	0.241834	11.0567				0.151692		100.712	0.777117	0.777105	1360.99		-5.41584	0.0651519		6.11997	0.221603		1360.85	59.1668	1360.85	29.5834
	OIB data	Coogan et al. (2014 JP)	TO-080614-4-8-ol05	High-Ti group	40.0815	0.0506394	0.003	0.117978	11.2494	0.180714	47.5282	0.352853	0.00814528	0.382423	0.00565008	100	88.2777	88.2777	TO-080614-4-8-sp2	0	0.340808	15.6668	53.5546	15.6699	0.170378	14.5457				0.131608		100.273	0.696339	0.696325	1305.66		-5.73457	0.0592424		6.33446	0.224761		1305.52	56.0148	1305.52	28.0074
	OIB data	Coogan et al. (2014 JP)	TO-080614-4-8-ol06	High-Ti group	40.0062	0.0544104	0.003	0.112702	11.4262	0.183755	47.4098	0.3607	0.00626227	0.390153	0.00572295	100	88.0892	88.0892	TO-080614-4-8-sp2	0	0.340802	15.6665	53.5537	15.6695	0.170375	14.5471				0.131568		100.273	0.696339	0.696325	1321.89		-5.66273	0.0551365		6.27002	0.222774		1321.74	56.6665	1321.74	28.3333
	OIB data	Coogan et al. (2014 JP)	TO-080614-4-8-ol07	High-Ti group	39.9467	0.0562926	0.003	0.116433	11.4836	0.184225	47.4011	0.36129	0.0083294	0.391443	0.0071866	100	88.0345	88.0345	TO-080614-4-8-sp2	0	0.340807	15.667	53.5552	15.6693	0.170374	14.5454				0.13151		100.273	0.696339	0.696325	1329.68		-5.62875	0.053293		6.23954	0.221873		1329.53	56.99	1329.53	28.495
	OIB data	Coogan et al. (2014 JP)	TO-080614-5-11-ol03	High-Ti group	40.2903	0.0383094	0.003	0.117039	10.7951	0.169323	47.8321	0.323909	0.00709113	0.383439	0.0081325	100	88.7613	88.7613	TO-080614-5-11-sp1	0	0.165147	9.55342	58.4436	20.0995	0.213911	12.5374				0.133935		101.377	0.80407	0.80406	1330.51		-5.51896	0.0783098		6.2363	0.226739		1330.37	58.3005	1330.37	29.1502
	OIB data	Coogan et al. (2014 JP)	TO-080614-5-11-ol04	High-Ti group	40.1611	0.054311	0.003	0.121633	11.2186	0.178843	47.4409	0.379266	0.00984781	0.381982	0.0114427	100	88.287	88.287	TO-080614-5-11-sp1	0	0.16514	9.55362	58.4449	20.098	0.213883	12.5381				0.133849		101.377	0.80407	0.80406	1415.26		-5.16995	0.0552374		5.92323	0.215869		1415.12	61.5281	1415.12	30.7641
	OIB data	Coogan et al. (2014 JP)	TO-080614-5-11-ol05	High-Ti group	40.152	0.0520951	0.003	0.110649	11.2352	0.178912	47.4392	0.381535	0.00851348	0.381793	0.019015	100	88.2713	88.2713	TO-080614-5-11-sp2	0	0.198776	10.0252	57.6583	20.319	0.207898	11.0457				0.142081		99.81	0.794162	0.794151	1395.04		-5.25979	0.057587		5.99506	0.217645		1394.89	60.5566	1394.89	30.2783
	OIB data	Coogan et al. (2014 JP)	TO-080614-5-11-ol08	High-Ti group	40.2075	0.0499786	0.003	0.119183	11.1407	0.177111	47.4878	0.37504	0.0103244	0.379279	0.0100878	100	88.3691	88.3691	TO-080614-5-11-sp2	0	0.198811	10.0253	57.6588	20.3191	0.207874	11.0452				0.142129		99.8102	0.794161	0.794151	1384.75		-5.30127	0.0600256		6.03227	0.218801		1384.6	60.1295	1384.6	30.0647
	OIB data	Coogan et al. (2014 JP)	TO-080614-5-11-ol08	High-Ti group	41.1861	0.0860531	0.003	0.134388	5.80074	0.0930839	51.9981	0.209364	0.00548716	0.456266	0.00404024	100	94.11	94.11	TO-080614-5-11-sp2	0	0.198821	10.0255	57.6601	20.3185	0.207899	11.0444				0.142156		99.8103	0.794162	0.794151	1530.46		-4.75793	0.0348622		5.54489	0.206244		1530.31	67.0805	1530.31	33.5402
	OIB data	Coogan et al. (2014 JP)	TO-080614-5-7-ol01	High-Ti group	40.7165	0.0889851	0.003	0.170966	8.16448	0.127601	50.0337	0.245791	0.00654794	0.41262	0.00363496	100	91.613	91.613	TO-080614-5-7-sp1	0	0.110043	9.58432	63.5616	17.7156	0.205784	16.0381				0.0685763		107.468	0.816475	0.816465	1547.1		-4.67942	0.0337135		5.49419	0.205126		1546.95	67.9537	1546.95	33.9769
	OIB data	Coogan et al. (2014 JP)	TO-080614-5-7-ol02	High-Ti group	40.7159	0.0944102	0.003	0.161897	8.23426	0.130447	49.9393	0.260636	0.00864737	0.423255	0.00322808	100	91.5327	91.5327	TO-080614-5-7-sp1	0	0.110226	9.58544	63.5723	17.7162	0.205675	16.0278				0.0681641		107.469	0.816483	0.816473	1564.82		-4.62035	0.0317762		5.44122	0.204038		1564.67	68.9157	1564.67	34.4578
	OIB data	Coogan et al. (2014 JP)	TO-080614-5-7-ol04	High-Ti group	40.8468	0.0723728	0.003	0.166153	7.29734	0.116192	50.763	0.247797	0.00504533	0.442594	0.0128467	100	92.5369	92.5369	TO-080614-5-7-sp1	0	0.110014	9.58607	63.5401	17.7279	0.206179	16.0482				0.0690677		107.471	0.816397	0.816387	1487.67		-4.88624	0.041452		5.67964	0.209239		1487.53	64.8636	1487.53	32.4318
	OIB data	Coogan et al. (2014 JP)	TO-080614-7-11-ol01	High-Ti group	40.6992	0.0714528	0.003	0.171514	7.43017	0.118416	50.7643	0.248876	0.0057935	0.447899	0.0117249	100	92.4116	92.4116	TO-080614-7-11-sp1	0	2.00773	8.49184	47.3333	28.8359	0.248307	8.40616				0.240254		95.8653	0.788994	0.788984	1526.15		-4.77782	0.0419857		5.55817	0.207559		1526	67.1858	1526	33.5929
	OIB data	Coogan et al. (2014 JP)	TO-080614-7-11-ol03	High-Ti group	40.8569	0.0687678	0.003	0.162923	7.19011	0.113899	50.8852	0.238776	0.0054739	0.432376	0.0160202	100	92.6549	92.6549	TO-080614-7-11-sp1	0	2.00773	8.49191	47.3333	28.8362	0.24831	8.40577				0.240217		95.8653	0.788993	0.788982	1515.1		-4.81613	0.043625		5.59253	0.208382		1514.95	66.6261	1514.95	33.313
	OIB data	Coogan et al. (2014 JP)	TO-080614-7-11-ol04	High-Ti group	40.4145	0.0710361	0.003	0.120586	9.4598	0.146585	49.1114	0.237016	0.00584414	0.400399	0.00382058	100	90.2474	90.2474	TO-080614-7-11-sp1	0	2.00771	8.49186	47.3331	28.8363	0.248311	8.40606				0.240217		95.8653	0.788993	0.788982	1524.45		-4.78368	0.0422321		5.56342	0.207683		1524.31	67.0993	1524.31	33.5496
	OIB data	Coogan et al. (2014 JP)	TO-080614-7-11-ol05	High-Ti group	40.3752	0.0792437	0.003	0.144069	9.5969	0.149316	48.972	0.238524	0.00563512	0.406417	0.0028313	100	90.0947	90.0947	TO-080614-7-11-sp1	0	2.00769	8.49179	47.3331	28.8368	0.248319	8.40557				0.240229		95.8653	0.788994	0.788984	1556.71		-4.67433	0.0378579		5.46533	0.205436		1556.56	68.7771	1556.56	34.3885
	OIB data	Coogan et al. (2014 JP)	TO-080614-7-11-ol05	High-Ti group	40.5999	0.0796296	0.003	0.13552	8.76852	0.135346	49.6018	0.234289	0.00680266	0.403652	0.00403899	100	90.9771	90.9771	TO-080614-7-11-sp1	0	2.00769	8.49181	47.3332	28.8368	0.248315	8.4055				0.240215		95.8653	0.788995	0.788984	1558.17		-4.66947	0.0376744		5.46098	0.20534		1558.02	68.8546	1558.02	34.4273
	OIB data	Coogan et al. (2014 JP)	TO-080614-7-22-ol05	High-Ti group	40.7388	0.0777581	0.003	0.117913	8.47302	0.133354	49.8027	0.233497	0.00642435	0.386394	0.0041987	100	91.2868	91.2868	TO-080614-7-22-sp1	0	0.948957	10.0893	49.2972	25.8958	0.224107	10.6009				0.197335		97.4746	0.766233	0.766221	1507.37		-4.86563	0.0385812		5.61681	0.208143		1507.22	65.9756	1507.22	32.9878
	OIB data	Coogan et al. (2014 JP)	TO-080714-8-13-ol01	High-Ti group	41.1532	0.0777051	0.003	0.131253	6.02557	0.101364	51.8226	0.22699	0.00564269	0.425939	0.00370629	100	93.8762	93.8762	TO-080714-8-13-sp1	0	1.39826	7.98397	50.3879	26.1401	0.26156	9.80879				0.191339		96.5323	0.808931	0.808921	1563.47		-4.63227	0.0386075		5.44523	0.205096		1563.32	69.1711	1563.32	34.5855
	OIB data	Coogan et al. (2014 JP)	TO-080714-8-13-ol02	High-Ti group	41.0995	0.0824232	0.003	0.142785	6.04258	0.102201	51.8421	0.224266	0.00732815	0.427961	0.00290303	100	93.8621	93.8621	TO-080714-8-13-sp1	0	1.39826	7.98394	50.3879	26.1403	0.261562	9.80859				0.191337		96.5323	0.808932	0.808922	1581.47		-4.57332	0.0363975		5.39235	0.203941		1581.33	70.137	1581.33	35.0685
	OIB data	Coogan et al. (2014 JP)	TO-080714-8-13-ol03	High-Ti group	41.1128	0.0766867	0.003	0.136443	6.01117	0.100888	51.8708	0.227608	0.00770392	0.426074	0.00320197	100	93.8953	93.8953	TO-080714-8-13-sp1	0	1.39826	7.98393	50.3879	26.1403	0.261563	9.80862				0.191347		96.5323	0.808932	0.808922	1559.48		-4.64546	0.0391202		5.45706	0.205361		1559.34	68.9603	1559.34	34.4801
	OIB data	Coogan et al. (2014 JP)	TO-080714-8-20-ol04	High-Ti group	40.4311	0.0487693	0.003	0.0988752	10.0452	0.153389	48.5132	0.267892	0.0103793	0.387793	0.00597754	100	89.5923	89.5923	TO-080714-8-20-sp1	0	1.53884	7.49855	49.7901	28.416	0.259649	9.82661				0.207056		97.8569	0.816659	0.816649	1447.09		-5.03536	0.0615141		5.81364	0.215334		1446.94	63.7112	1446.94	31.8556
	OIB data	Coogan et al. (2014 JP)	TO-080714-8-20-ol05	High-Ti group	40.4512	0.0498242	0.003	0.110412	9.91396	0.151377	48.6098	0.272072	0.0127762	0.383674	0.00556568	100	89.7326	89.7326	TO-080714-8-20-sp1	0	1.53884	7.49856	49.7902	28.4159	0.259647	9.82665				0.207056		97.8569	0.816659	0.816649	1452.79		-5.01396	0.0602116		5.79444	0.214724		1452.64	63.9526	1452.64	31.9763
	OIB data	Coogan et al. (2014 JP)	TO-080714-8-29-ol02	High-Ti group	40.494	0.0493892	0.003	0.112572	9.98951	0.153239	48.4824	0.275866	0.0114279	0.388182	0.00602724	100	89.6381	89.6381	TO-080714-8-29-sp1	0	0.547707	10.8247	55.0817	22.3533	0.21199	11.2961				0.115009		100.779	0.773425	0.773414	1368.12		-5.38985	0.060742		6.0934	0.220171		1367.97	59.2982	1367.97	29.6491
	OIB data	Coogan et al. (2014 JP)	TO-080714-8-29-ol03	High-Ti group	40.4642	0.0776826	0.003	0.147008	9.84937	0.150583	48.6015	0.266442	0.00926279	0.384465	0.00242757	100	89.7911	89.7911	TO-080714-8-29-sp1	0	0.547766	10.8235	55.076	22.3481	0.212038	11.3052				0.115552		100.776	0.773427	0.773415	1485.38		-4.93684	0.0386187		5.68704	0.209243		1485.23	64.6961	1485.23	32.3481
	OIB data	Coogan et al. (2014 JP)	TO-080714-8-33-ol01	High-Ti group	40.0032	0.0427185	0.003	0.0807349	11.4867	0.179306	47.5031	0.291134	0.00868759	0.361962	0.00355004	100	88.0544	88.0544	TO-080714-8-33-sp1	0	1.47024	14.6924	42.1025	29.2518	0.258688	9.49577				0.1978		97.8889	0.657808	0.657793	1290.63		-5.84046	0.0702272		6.39538	0.228761		1290.48	55.9306	1290.48	27.9653
	OIB data	Coogan et al. (2014 JP)	TO-080714-8-33-ol02	High-Ti group	40.205	0.0418673	0.003	0.081225	11.113	0.175037	47.6959	0.272537	0.00644765	0.364233	0.0084332	100	88.4394	88.4394	TO-080714-8-33-sp1	0	1.47028	14.6927	42.1032	29.2534	0.258705	9.49282				0.197755		97.8886	0.657807	0.657792	1286.22		-5.8606	0.0716549		6.41345	0.229438		1286.07	55.7805	1286.07	27.8903
	OIB data	Coogan et al. (2014 JP)	TO-080714-8-33-ol03	High-Ti group	40.1856	0.0353266	0.003	0.0955685	10.6198	0.165945	48.1994	0.270914	0.00797361	0.381111	0.00364827	100	88.9987	88.9987	TO-080714-8-33-sp1	0	1.4702	14.6923	42.1019	29.2533	0.258704	9.49502				0.19778		97.8888	0.657807	0.657792	1250.04		-6.03044	0.0849218		6.56579	0.235745		1249.9	54.6849	1249.9	27.3425
	OIB data	Coogan et al. (2014 JP)	CUR11-21SP1	Curacao	39.9585	0.0444936	0.003	0.0997486	10.8489	0.172375	47.3143	0.273552	0.0023772	0.348894	0.00587308	99.1023	88.6021	88.6021	CUR11-21SP1	0.0707	0.5241	18.9657	45.6004	21.4769	0.2265	12.9242				0.1604		100.247	0.617287	0.617272	1253.24		-6.05504	0.0674255		6.55204	0.231346		1253.09	53.8901	1253.09	26.9451
	OIB data	Coogan et al. (2014 JP)	CUR11-21SP2	Curacao	39.6366	0.0439524	0.003	0.182231	10.6739	0.169795	46.9901	0.285587	0.00184806	0.340891	0.000580165	98.3599	88.6966	88.6966	CUR11-21SP1	0.0707	0.5241	18.9657	45.6004	21.4769	0.2265	12.9242				0.1604		100.247	0.617287	0.617272	1250.69		-6.06728	0.0682556		6.56302	0.231742		1250.54	53.802	1250.54	26.901
	OIB data	Coogan et al. (2014 JP)	CUR11-21SP3	Curacao	39.8789	0.0427522	0.003	0.10994	10.9301	0.17197	47.2014	0.288324	0.00380853	0.345349	0.00400384	99.0105	88.5023	88.5023	CUR11-21SP1	0.0707	0.5241	18.9657	45.6004	21.4769	0.2265	12.9242				0.1604		100.247	0.617287	0.617272	1244.94		-6.09497	0.0701719		6.58785	0.232655		1244.79	53.6074	1244.79	26.8037
	OIB data	Coogan et al. (2014 JP)	CUR11-25SP1	Curacao	39.837	0.0449134	0.003	0.0860642	11.3775	0.177756	47.0146	0.290506	0.00279957	0.345192	0.0138331	99.2254	88.0461	88.0461	CUR11-25SP1	0.1027	0.5259	18.2555	44.6664	22.8653	0.2427	12.1501				0.1739		99.3009	0.621406	0.621391	1262.38		-6.00749	0.0667953		6.51302	0.230443		1262.24	54.3248	1262.24	27.1624
	OIB data	Coogan et al. (2014 JP)	CUR11-25SP2	Curacao	39.8433	0.0492592	0.003	0.0883585	11.3404	0.177124	46.9941	0.288956	0.00479552	0.344923	0.0390976	99.2048	88.0758	88.0758	CUR11-25SP1	0.1027	0.5259	18.2555	44.6664	22.8653	0.2427	12.1501				0.1739		99.3009	0.621406	0.621391	1282.16		-5.91513	0.0609023		6.43018	0.227619		1282.02	55.0506	1282.02	27.5253
	OIB data	Coogan et al. (2014 JP)	CUR11-25SP3	Curacao	39.8845	0.0431191	0.003	0.0834773	11.3793	0.176704	47.0007	0.285173	0.00401376	0.347127	0.0103885	99.2487	88.0414	88.0414	CUR11-25SP1	0.1027	0.5259	18.2555	44.6664	22.8653	0.2427	12.1501				0.1739		99.3009	0.621406	0.621391	1253.81		-6.04826	0.0695748		6.54959	0.231767		1253.66	54.0286	1253.66	27.0143
	OIB data	Coogan et al. (2014 JP)	CUR11-2SP1	Curacao	39.9616	0.0437839	0.003	0.0884148	10.8844	0.173993	47.3689	0.29255	0.00135396	0.350957	0.00499925	99.2043	88.5808	88.5808	CUR11-2SP1	0.1118	0.4322	20.9856	42.0479	21.9885	0.232	12.8263				0.1861		99.1631	0.573401	0.573384	1237.93		-6.17233	0.0685183		6.61845	0.233325		1237.78	53.2658	1237.78	26.6329
	OIB data	Coogan et al. (2014 JP)	CUR11-2SP2	Curacao	39.9668	0.0472716	0.003	0.0854252	10.878	0.171965	47.3768	0.297051	0.00320918	0.350431	0.0185298	99.2312	88.5884	88.5884	CUR11-2SP1	0.1118	0.4322	20.9856	42.0479	21.9885	0.232	12.8263				0.1861		99.1631	0.573401	0.573384	1253.78		-6.09568	0.063463		6.5497	0.230902		1253.64	53.8252	1253.64	26.9126
	OIB data	Coogan et al. (2014 JP)	CUR11-2SP3	Curacao	39.9787	0.0428553	0.003	0.0785268	10.8804	0.173168	47.4579	0.290635	0.0038008	0.348524	0.00440506	99.2933	88.6035	88.6035	CUR11-2SP1	0.1118	0.4322	20.9856	42.0479	21.9885	0.232	12.8263				0.1861		99.1631	0.573401	0.573384	1233.55		-6.19376	0.0700031		6.63768	0.234033		1233.4	53.1184	1233.4	26.5592
	OIB data	Coogan et al. (2014 JP)	CUR11-30SP1	Curacao	39.8209	0.0655919	0.003	0.112389	11.3621	0.177295	46.771	0.291785	0.000283963	0.343313	0.00699717	98.9885	88.0056	88.0056	CUR11-30SP1	0.1148	0.4144	19.6104	42.8226	23.6157	0.2291	12.178				0.1786		99.5087	0.5943	0.594285	1336.38		-5.70036	0.0457374		6.21357	0.221109		1336.23	57.2694	1336.23	28.6347
	OIB data	Coogan et al. (2014 JP)	CUR11-30SP2	Curacao	39.8338	0.0684694	0.003	0.1085	11.3359	0.178534	46.8198	0.288071	0.00141307	0.345481	0.00453733	99.0235	88.041	88.041	CUR11-30SP1	0.1148	0.4144	19.6104	42.8226	23.6157	0.2291	12.178				0.1786		99.5087	0.5943	0.594285	1346.41		-5.65743	0.0438152		6.17506	0.220104		1346.27	57.7225	1346.27	28.8613
	OIB data	Coogan et al. (2014 JP)	CUR11-30SP3	Curacao	39.8274	0.0643956	0.003	0.111949	11.3481	0.179255	46.7746	0.288425	0.00299821	0.345638	0.0116412	98.9925	88.0194	88.0194	CUR11-30SP1	0.1148	0.4144	19.6104	42.8226	23.6157	0.2291	12.178				0.1786		99.5087	0.5943	0.594285	1332.11		-5.71877	0.0465871		6.23008	0.221548		1331.96	57.0795	1331.96	28.5397
	OIB data	Coogan et al. (2014 JP)	CUR11-45SP1	Curacao	40.0225	0.0422211	0.003	0.0849516	10.5438	0.163468	47.6909	0.275143	0.00210699	0.373978	0.00286786	99.2354	88.9651	88.9651	CUR11-45SP1	0.1232	0.3867	17.432	47.0834	21.2816	0.2327	12.5491				0.1818		99.5727	0.644369	0.644354	1254.33		-6.02314	0.0710546		6.54737	0.231836		1254.18	54.0813	1254.18	27.0406
	OIB data	Coogan et al. (2014 JP)	CUR11-45SP2	Curacao	39.9447	0.0477507	0.003	0.0945099	10.622	0.163964	47.5773	0.284665	0.00500048	0.373559	0.00326149	99.1494	88.8688	88.8688	CUR11-45SP1	0.1232	0.3867	17.432	47.0834	21.2816	0.2327	12.5491				0.1818		99.5727	0.644369	0.644354	1280.52		-5.90007	0.0628263		6.43697	0.227913		1280.38	55.0055	1280.38	27.5027
	OIB data	Coogan et al. (2014 JP)	CUR11-45SP3	Curacao	39.8129	0.0432783	0.003	0.1216	10.5863	0.164941	47.4961	0.269142	0.0033283	0.372365	0.00246033	98.9056	88.8852	88.8852	CUR11-45SP1	0.1232	0.3867	17.432	47.0834	21.2816	0.2327	12.5491				0.1818		99.5727	0.644369	0.644354	1259.52		-5.99841	0.0693188		6.52518	0.231011		1259.37	54.2559	1259.37	27.1279
	Coogan LA, Saunders AD, Wilson RN (2014) Aluminum-in-olivine thermometry of primitive basalts: Evidence of an anomalously hot mantle source for large igneous provinces. Chem Geol 368:1-10
