# Supplementary material for: Magmatic processes within the plumbing system of the ultraslow-spreading southwest Indian ridge: constraints from olivine, plagioclase and melt inclusions
Source: Springer Nature journal article supplement (doi:10.1007/s00410-024-02098-0), 2024-02-22
Supplement: MOESM10 [file 410_2024_2098_MOESM10_ESM.xls]

## Sheet: PlotDat1
Source sheet	Table S10	1060	5.05461e-06	1144	0	1060	0
Plot name	ProbDens1	1060.71	5.61514e-06	1150	0	1299.29	0
Plot Type	16	1061.41	6.23306e-06	1150	1
1st free col	9	1062.12	6.93888e-06	1144	1
Sigma Level	1	1062.82	7.68754e-06	1144	0
Absolute Errs	TRUE	1063.53	8.50755e-06	ErrBox	ErrBox
Symbol Type	1	1064.24	9.40569e-06	1150	0
Inverse Plot	FALSE	1064.94	1.03606e-05	1156	0
Color Plot	TRUE	1065.65	1.1435e-05	1156	1
3D plot	FALSE	1066.35	1.26418e-05	1150	1
Linear	FALSE	1067.06	1.39005e-05	1150	0
Data Range	Q4:R39	1067.76	1.53045e-05	ErrBox	ErrBox
Filled Symbols	TRUE	1068.47	1.68075e-05	1156	0
ConcAge	FALSE	1069.18	1.84462e-05	1162	0
ConcSwap	FALSE	1069.88	2.02316e-05	1162	4
1st Symbol-row	1	1070.59	2.21755e-05	1156	4
		1071.29	2.42906e-05	1156	0
		1072	2.65903e-05	ErrBox	ErrBox
		1072.71	2.90889e-05	1162	0
		1073.41	3.1802e-05	1168	0
		1074.12	3.47457e-05	1168	7
		1074.82	3.79376e-05	1162	7
		1075.53	4.1396e-05	1162	0
		1076.24	4.51407e-05	ErrBox	ErrBox
		1076.94	4.91926e-05	1168	0
		1077.65	5.35737e-05	1174	0
		1078.35	5.83076e-05	1174	11
		1079.06	6.34191e-05	1168	11
		1079.76	6.89344e-05	1168	0
		1080.47	7.48813e-05	ErrBox	ErrBox
		1081.18	8.12891e-05	1174	0
		1081.88	8.81886e-05	1180	0
		1082.59	9.56124e-05	1180	10
		1083.29	0.000103595	1174	10
		1084	0.000112171	1174	0
		1084.71	0.00012138	ErrBox	ErrBox
		1085.41	0.000131261	1180	0
		1086.12	0.000141855	1186	0
		1086.82	0.000153207	1186	1
		1087.53	0.00016536	1180	1
		1088.24	0.000178363	1180	0
		1088.94	0.000192265	ErrBox	ErrBox
		1089.65	0.000207118	1204	0
		1090.35	0.000223003	1210	0
		1091.06	0.000239924	1210	1
		1091.76	0.000257964	1204	1
		1092.47	0.000277183	1204	0
		1093.18	0.000297642	ErrBox	ErrBox
		1093.88	0.000319407
		1094.59	0.000342543
		1095.29	0.00036712
		1096	0.000393209
		1096.71	0.000420881
		1097.41	0.000450212
		1098.12	0.000481278
		1098.82	0.000514157
		1099.53	0.000548931
		1100.24	0.000585681
		1100.94	0.000624489
		1101.65	0.000665442
		1102.35	0.000708626
		1103.06	0.000754127
		1103.76	0.000802035
		1104.47	0.000852438
		1105.18	0.000905427
		1105.88	0.000961091
		1106.59	0.00101952
		1107.29	0.00108081
		1108	0.00114504
		1108.71	0.00121232
		1109.41	0.00128272
		1110.12	0.00135633
		1110.82	0.00143324
		1111.53	0.00151354
		1112.24	0.00159731
		1112.94	0.00168463
		1113.65	0.00177557
		1114.35	0.00187022
		1115.06	0.00196864
		1115.76	0.00207091
		1116.47	0.00217708
		1117.18	0.00228721
		1117.88	0.00240137
		1118.59	0.00251959
		1119.29	0.00264192
		1120	0.0027684
		1120.71	0.00289906
		1121.41	0.00303392
		1122.12	0.00317299
		1122.82	0.00331629
		1123.53	0.00346382
		1124.24	0.00361556
		1124.94	0.0037715
		1125.65	0.00393161
		1126.35	0.00409586
		1127.06	0.00426421
		1127.76	0.00443658
		1128.47	0.00461292
		1129.18	0.00479316
		1129.88	0.00497719
		1130.59	0.00516493
		1131.29	0.00535626
		1132	0.00555106
		1132.71	0.0057492
		1133.41	0.00595053
		1134.12	0.00615489
		1134.82	0.00636212
		1135.53	0.00657203
		1136.24	0.00678444
		1136.94	0.00699913
		1137.65	0.00721591
		1138.35	0.00743453
		1139.06	0.00765477
		1139.76	0.00787638
		1140.47	0.0080991
		1141.18	0.00832267
		1141.88	0.00854681
		1142.59	0.00877124
		1143.29	0.00899566
		1144	0.00921978
		1144.71	0.00944329
		1145.41	0.00966586
		1146.12	0.0098872
		1146.82	0.010107
		1147.53	0.0103248
		1148.24	0.0105405
		1148.94	0.0107535
		1149.65	0.0109637
		1150.35	0.0111706
		1151.06	0.011374
		1151.76	0.0115734
		1152.47	0.0117686
		1153.18	0.0119592
		1153.88	0.012145
		1154.59	0.0123254
		1155.29	0.0125003
		1156	0.0126694
		1156.71	0.0128323
		1157.41	0.0129887
		1158.12	0.0131384
		1158.82	0.013281
		1159.53	0.0134164
		1160.24	0.0135441
		1160.94	0.0136641
		1161.65	0.0137761
		1162.35	0.0138799
		1163.06	0.0139752
		1163.76	0.0140619
		1164.47	0.0141398
		1165.18	0.0142088
		1165.88	0.0142686
		1166.59	0.0143194
		1167.29	0.0143608
		1168	0.0143928
		1168.71	0.0144155
		1169.41	0.0144286
		1170.12	0.0144323
		1170.82	0.0144264
		1171.53	0.0144111
		1172.24	0.0143863
		1172.94	0.0143521
		1173.65	0.0143086
		1174.35	0.0142558
		1175.06	0.0141939
		1175.76	0.014123
		1176.47	0.0140432
		1177.18	0.0139546
		1177.88	0.0138576
		1178.59	0.0137522
		1179.29	0.0136386
		1180	0.0135172
		1180.71	0.013388
		1181.41	0.0132514
		1182.12	0.0131076
		1182.82	0.012957
		1183.53	0.0127996
		1184.24	0.012636
		1184.94	0.0124663
		1185.65	0.0122909
		1186.35	0.01211
		1187.06	0.0119241
		1187.76	0.0117334
		1188.47	0.0115383
		1189.18	0.011339
		1189.88	0.011136
		1190.59	0.0109295
		1191.29	0.01072
		1192	0.0105076
		1192.71	0.0102929
		1193.41	0.010076
		1194.12	0.00985742
		1194.82	0.00963736
		1195.53	0.00941617
		1196.24	0.00919418
		1196.94	0.00897169
		1197.65	0.008749
		1198.35	0.00852641
		1199.06	0.0083042
		1199.76	0.00808266
		1200.47	0.00786204
		1201.18	0.00764262
		1201.88	0.00742463
		1202.59	0.00720833
		1203.29	0.00699393
		1204	0.00678166
		1204.71	0.00657172
		1205.41	0.00636431
		1206.12	0.00615961
		1206.82	0.00595779
		1207.53	0.00575902
		1208.24	0.00556344
		1208.94	0.0053712
		1209.65	0.00518241
		1210.35	0.00499719
		1211.06	0.00481565
		1211.76	0.00463788
		1212.47	0.00446396
		1213.18	0.00429396
		1213.88	0.00412794
		1214.59	0.00396596
		1215.29	0.00380804
		1216	0.00365423
		1216.71	0.00350454
		1217.41	0.00335898
		1218.12	0.00321757
		1218.82	0.0030803
		1219.53	0.00294714
		1220.24	0.0028181
		1220.94	0.00269313
		1221.65	0.00257221
		1222.35	0.0024553
		1223.06	0.00234235
		1223.76	0.00223332
		1224.47	0.00212814
		1225.18	0.00202676
		1225.88	0.00192912
		1226.59	0.00183514
		1227.29	0.00174477
		1228	0.00165791
		1228.71	0.0015745
		1229.41	0.00149445
		1230.12	0.00141769
		1230.82	0.00134413
		1231.53	0.0012737
		1232.24	0.00120629
		1232.94	0.00114183
		1233.65	0.00108023
		1234.35	0.0010214
		1235.06	0.000965265
		1235.76	0.000911723
		1236.47	0.000860694
		1237.18	0.000812091
		1237.88	0.000765829
		1238.59	0.000721823
		1239.29	0.000679991
		1240	0.00064025
		1240.71	0.000602519
		1241.41	0.00056672
		1242.12	0.000532773
		1242.82	0.000500603
		1243.53	0.000470136
		1244.24	0.000441299
		1244.94	0.000414021
		1245.65	0.000388234
		1246.35	0.000363869
		1247.06	0.000340862
		1247.76	0.000319151
		1248.47	0.000298674
		1249.18	0.000279371
		1249.88	0.000261187
		1250.59	0.000244066
		1251.29	0.000227954
		1252	0.000212802
		1252.71	0.000198559
		1253.41	0.000185178
		1254.12	0.000172615
		1254.82	0.000160825
		1255.53	0.000149768
		1256.24	0.000139403
		1256.94	0.000129692
		1257.65	0.000120598
		1258.35	0.000112088
		1259.06	0.000104127
		1259.76	9.66853e-05
		1260.47	8.97313e-05
		1261.18	8.32107e-05
		1261.88	7.71517e-05
		1262.59	7.1499e-05
		1263.29	6.62281e-05
		1264	6.13157e-05
		1264.71	5.67398e-05
		1265.41	5.24797e-05
		1266.12	4.84891e-05
		1266.82	4.48053e-05
		1267.53	4.13808e-05
		1268.24	3.81991e-05
		1268.94	3.52446e-05
		1269.65	3.25023e-05
		1270.35	2.99584e-05
		1271.06	2.75997e-05
		1271.76	2.5414e-05
		1272.47	2.33895e-05
		1273.18	2.14903e-05
		1273.88	1.97591e-05
		1274.59	1.8158e-05
		1275.29	1.66024e-05
		1276	1.52438e-05
		1276.71	1.3962e-05
		1277.41	1.27798e-05
		1278.12	1.16911e-05
		1278.82	1.06629e-05
		1279.53	9.76794e-06
		1280.24	8.94322e-06
		1280.94	8.13148e-06
		1281.65	7.43822e-06
		1282.35	6.74648e-06
		1283.06	6.1389e-06
		1283.76	5.60812e-06
		1284.47	5.09501e-06
		1285.18	4.62338e-06
		1285.88	4.21762e-06
		1286.59	3.79124e-06
		1287.29	3.43048e-06
		1288	3.04782e-06
		1288.71	2.77718e-06
		1289.41	2.4774e-06
		1290.12	2.25581e-06
		1290.82	1.97657e-06
		1291.53	1.77188e-06
		1292.24	1.61243e-06
		1292.94	1.44147e-06
		1293.65	1.28352e-06
		1294.35	1.11383e-06
		1295.06	1.01291e-06
		1295.76	8.93209e-07
		1296.47	8.11672e-07
		1297.18	7.37035e-07
		1297.88	6.68769e-07
		1298.59	6.06378e-07
		1299.29	5.49402e-07
		IsoLine	IsoLine

## Sheet: PlotDat2
Source sheet	Table S10	1080	1.14169e-05	1173.5	0	1080	0
Plot name	ProbDens2	1080.65	1.25167e-05	1179	0	1299.35	0
Plot Type	16	1081.29	1.37139e-05	1179	2
1st free col	9	1081.94	1.50164e-05	1173.5	2
Sigma Level	1	1082.59	1.64324e-05	1173.5	0
Absolute Errs	TRUE	1083.24	1.79709e-05	ErrBox	ErrBox
Symbol Type	1	1083.88	1.96414e-05	1179	0
Inverse Plot	FALSE	1084.53	2.14539e-05	1184.5	0
Color Plot	TRUE	1085.18	2.34192e-05	1184.5	1
3D plot	FALSE	1085.82	2.55488e-05	1179	1
Linear	FALSE	1086.47	2.78549e-05	1179	0
Data Range	Q4:R5,Q24:R25	1087.12	3.03505e-05	ErrBox	ErrBox
Filled Symbols	TRUE	1087.76	3.30493e-05	1201	0
ConcAge	FALSE	1088.41	3.59659e-05	1206.5	0
ConcSwap	FALSE	1089.06	3.91157e-05	1206.5	1
1st Symbol-row	1	1089.71	4.25152e-05	1201	1
		1090.35	4.64344e-05	1201	0
		1091	5.04152e-05	ErrBox	ErrBox
		1091.65	5.47039e-05
		1092.29	5.93211e-05
		1092.94	6.42886e-05
		1093.59	6.96295e-05
		1094.24	7.5368e-05
		1094.88	8.15296e-05
		1095.53	8.8141e-05
		1096.18	9.52303e-05
		1096.82	0.000102827
		1097.47	0.000110962
		1098.12	0.000119667
		1098.76	0.000128976
		1099.41	0.000138925
		1100.06	0.00014955
		1100.71	0.000160889
		1101.35	0.000172983
		1102	0.000185872
		1102.65	0.0001996
		1103.29	0.000214211
		1103.94	0.000229751
		1104.59	0.000246269
		1105.24	0.000263813
		1105.88	0.000282436
		1106.53	0.000302189
		1107.18	0.000323127
		1107.82	0.000345305
		1108.47	0.000368782
		1109.12	0.000393615
		1109.76	0.000419865
		1110.41	0.000447594
		1111.06	0.000476865
		1111.71	0.000507741
		1112.35	0.000540289
		1113	0.000574575
		1113.65	0.000610666
		1114.29	0.00064863
		1114.94	0.000688538
		1115.59	0.000730459
		1116.24	0.000774463
		1116.88	0.000820622
		1117.53	0.000869006
		1118.18	0.000919687
		1118.82	0.000972737
		1119.47	0.00102822
		1120.12	0.00108622
		1120.76	0.0011468
		1121.41	0.00121003
		1122.06	0.00127597
		1122.71	0.0013447
		1123.35	0.00141627
		1124	0.00149076
		1124.65	0.00156823
		1125.29	0.00164873
		1125.94	0.00173232
		1126.59	0.00181906
		1127.24	0.001909
		1127.88	0.00200218
		1128.53	0.00209866
		1129.18	0.00219847
		1129.82	0.00230165
		1130.47	0.00240824
		1131.12	0.00251826
		1131.76	0.00263173
		1132.41	0.00274868
		1133.06	0.00286912
		1133.71	0.00299306
		1134.35	0.0031205
		1135	0.00325143
		1135.65	0.00338585
		1136.29	0.00352373
		1136.94	0.00366506
		1137.59	0.00380981
		1138.24	0.00395793
		1138.88	0.00410939
		1139.53	0.00426413
		1140.18	0.00442209
		1140.82	0.0045832
		1141.47	0.0047474
		1142.12	0.00491459
		1142.76	0.00508469
		1143.41	0.0052576
		1144.06	0.00543322
		1144.71	0.00561142
		1145.35	0.00579208
		1146	0.00597509
		1146.65	0.00616029
		1147.29	0.00634754
		1147.94	0.0065367
		1148.59	0.00672759
		1149.24	0.00692006
		1149.88	0.00711393
		1150.53	0.00730901
		1151.18	0.00750512
		1151.82	0.00770207
		1152.47	0.00789965
		1153.12	0.00809766
		1153.76	0.00829589
		1154.41	0.00849412
		1155.06	0.00869214
		1155.71	0.00888972
		1156.35	0.00908662
		1157	0.00928264
		1157.65	0.00947751
		1158.29	0.00967103
		1158.94	0.00986293
		1159.59	0.010053
		1160.24	0.010241
		1160.88	0.0104266
		1161.53	0.0106097
		1162.18	0.01079
		1162.82	0.0109673
		1163.47	0.0111413
		1164.12	0.0113118
		1164.76	0.0114785
		1165.41	0.0116413
		1166.06	0.0118
		1166.71	0.0119542
		1167.35	0.0121038
		1168	0.0122487
		1168.65	0.0123885
		1169.29	0.0125231
		1169.94	0.0126523
		1170.59	0.012776
		1171.24	0.012894
		1171.88	0.013006
		1172.53	0.013112
		1173.18	0.0132118
		1173.82	0.0133053
		1174.47	0.0133924
		1175.12	0.0134729
		1175.76	0.0135467
		1176.41	0.0136138
		1177.06	0.013674
		1177.71	0.0137274
		1178.35	0.0137738
		1179	0.0138131
		1179.65	0.0138454
		1180.29	0.0138706
		1180.94	0.0138887
		1181.59	0.0138998
		1182.24	0.0139037
		1182.88	0.0139005
		1183.53	0.0138903
		1184.18	0.0138731
		1184.82	0.0138489
		1185.47	0.0138178
		1186.12	0.0137799
		1186.76	0.0137353
		1187.41	0.0136839
		1188.06	0.013626
		1188.71	0.0135617
		1189.35	0.013491
		1190	0.0134141
		1190.65	0.0133311
		1191.29	0.0132422
		1191.94	0.0131474
		1192.59	0.0130471
		1193.24	0.0129412
		1193.88	0.01283
		1194.53	0.0127137
		1195.18	0.0125925
		1195.82	0.0124664
		1196.47	0.0123358
		1197.12	0.0122007
		1197.76	0.0120614
		1198.41	0.0119181
		1199.06	0.011771
		1199.71	0.0116203
		1200.35	0.0114661
		1201	0.0113087
		1201.65	0.0111483
		1202.29	0.0109851
		1202.94	0.0108193
		1203.59	0.0106511
		1204.24	0.0104807
		1204.88	0.0103083
		1205.53	0.0101341
		1206.18	0.00995827
		1206.82	0.00978105
		1207.47	0.00960262
		1208.12	0.00942317
		1208.76	0.00924289
		1209.41	0.00906195
		1210.06	0.00888055
		1210.71	0.00869885
		1211.35	0.00851704
		1212	0.00833527
		1212.65	0.00815372
		1213.29	0.00797255
		1213.94	0.0077919
		1214.59	0.00761193
		1215.24	0.00743279
		1215.88	0.00725461
		1216.53	0.00707754
		1217.18	0.00690169
		1217.82	0.00672721
		1218.47	0.00655419
		1219.12	0.00638277
		1219.76	0.00621305
		1220.41	0.00604513
		1221.06	0.00587911
		1221.71	0.00571508
		1222.35	0.00555314
		1223	0.00539335
		1223.65	0.00523581
		1224.29	0.00508058
		1224.94	0.00492772
		1225.59	0.00477731
		1226.24	0.00462939
		1226.88	0.00448401
		1227.53	0.00434123
		1228.18	0.00420108
		1228.82	0.0040636
		1229.47	0.00392882
		1230.12	0.00379678
		1230.76	0.00366749
		1231.41	0.00354097
		1232.06	0.00341723
		1232.71	0.0032963
		1233.35	0.00317817
		1234	0.00306285
		1234.65	0.00295034
		1235.29	0.00284064
		1235.94	0.00273373
		1236.59	0.0026296
		1237.24	0.00252825
		1237.88	0.00242966
		1238.53	0.0023338
		1239.18	0.00224065
		1239.82	0.0021502
		1240.47	0.00206241
		1241.12	0.00197725
		1241.76	0.0018947
		1242.41	0.00181471
		1243.06	0.00173726
		1243.71	0.0016623
		1244.35	0.0015898
		1245	0.00151971
		1245.65	0.001452
		1246.29	0.00138662
		1246.94	0.00132353
		1247.59	0.00126268
		1248.24	0.00120403
		1248.88	0.00114752
		1249.53	0.00109312
		1250.18	0.00104078
		1250.82	0.000990436
		1251.47	0.000942051
		1252.12	0.000895574
		1252.76	0.000850955
		1253.41	0.000808144
		1254.06	0.000767093
		1254.71	0.000727751
		1255.35	0.000690069
		1256	0.000653999
		1256.65	0.000619491
		1257.29	0.000586497
		1257.94	0.000554969
		1258.59	0.00052486
		1259.24	0.000496122
		1259.88	0.00046871
		1260.53	0.000442577
		1261.18	0.000417679
		1261.82	0.000393971
		1262.47	0.00037141
		1263.12	0.000349953
		1263.76	0.000329557
		1264.41	0.000310183
		1265.06	0.00029179
		1265.71	0.000274338
		1266.35	0.00025779
		1267	0.000242107
		1267.65	0.000227254
		1268.29	0.000213195
		1268.94	0.000199896
		1269.59	0.000187323
		1270.24	0.000175444
		1270.88	0.000164227
		1271.53	0.000153642
		1272.18	0.000143659
		1272.82	0.00013425
		1273.47	0.000125387
		1274.12	0.000117043
		1274.76	0.000109193
		1275.41	0.000101812
		1276.06	9.4877e-05
		1276.71	8.8364e-05
		1277.35	8.22515e-05
		1278	7.65184e-05
		1278.65	7.11444e-05
		1279.29	6.61101e-05
		1279.94	6.13969e-05
		1280.59	5.69872e-05
		1281.24	5.28639e-05
		1281.88	4.90108e-05
		1282.53	4.54124e-05
		1283.18	4.20539e-05
		1283.82	3.89214e-05
		1284.47	3.60014e-05
		1285.12	3.32811e-05
		1285.76	3.07486e-05
		1286.41	2.83923e-05
		1287.06	2.62013e-05
		1287.71	2.41654e-05
		1288.35	2.22746e-05
		1289	2.05198e-05
		1289.65	1.86628e-05
		1290.29	1.69321e-05
		1290.94	1.55815e-05
		1291.59	1.433e-05
		1292.24	1.31711e-05
		1292.88	1.20986e-05
		1293.53	1.11066e-05
		1294.18	9.94472e-06
		1294.82	9.12341e-06
		1295.47	8.36475e-06
		1296.12	7.66442e-06
		1296.76	7.01838e-06
		1297.41	6.42282e-06
		1298.06	5.87415e-06
		1298.71	5.36903e-06
		1299.35	4.90431e-06
		IsoLine	IsoLine

## Sheet: PlotDat3
Source sheet	Table S10	1060	5.68858e-06	1145	0	1060	0
Plot name	ProbDens3	1060.59	6.21512e-06	1150	0	1259.41	0
Plot Type	16	1061.18	6.75319e-06	1150	1
1st free col	9	1061.76	7.33449e-06	1145	1
Sigma Level	1	1062.35	8.02824e-06	1145	0
Absolute Errs	TRUE	1062.94	8.71255e-06	ErrBox	ErrBox
Symbol Type	1	1063.53	9.48437e-06	1150	0
Inverse Plot	FALSE	1064.12	1.03161e-05	1155	0
Color Plot	TRUE	1064.71	1.11815e-05	1155	1
3D plot	FALSE	1065.29	1.21459e-05	1150	1
Linear	FALSE	1065.88	1.31855e-05	1150	0
Data Range	Q6:R23,Q26:R39	1066.47	1.42736e-05	ErrBox	ErrBox
Filled Symbols	TRUE	1067.06	1.54446e-05	1155	0
ConcAge	FALSE	1067.65	1.6737e-05	1160	0
ConcSwap	FALSE	1068.24	1.80945e-05	1160	1
1st Symbol-row	1	1068.82	1.95533e-05	1155	1
		1069.41	2.11201e-05	1155	0
		1070	2.28023e-05	ErrBox	ErrBox
		1070.59	2.46074e-05	1160	0
		1071.18	2.65434e-05	1165	0
		1071.76	2.86189e-05	1165	8
		1072.35	3.08428e-05	1160	8
		1072.94	3.32246e-05	1160	0
		1073.53	3.57742e-05	ErrBox	ErrBox
		1074.12	3.85022e-05	1165	0
		1074.71	4.14196e-05	1170	0
		1075.29	4.45381e-05	1170	6
		1075.88	4.78699e-05	1165	6
		1076.47	5.14278e-05	1165	0
		1077.06	5.52253e-05	ErrBox	ErrBox
		1077.65	5.92767e-05	1170	0
		1078.24	6.35968e-05	1175	0
		1078.82	6.82011e-05	1175	8
		1079.41	7.31059e-05	1170	8
		1080	7.83283e-05	1170	0
		1080.59	8.38862e-05	ErrBox	ErrBox
		1081.18	8.97982e-05	1175	0
		1081.76	9.60837e-05	1180	0
		1082.35	0.000102763	1180	6
		1082.94	0.000109858	1175	6
		1083.53	0.000117389	1175	0
		1084.12	0.000125381	ErrBox	ErrBox
		1084.71	0.000133857	1180	0
		1085.29	0.000142842	1185	0
		1085.88	0.000152361	1185	1
		1086.47	0.000162443	1180	1
		1087.06	0.000173113	1180	0
		1087.65	0.000184402	ErrBox	ErrBox
		1088.24	0.000196339
		1088.82	0.000208955
		1089.41	0.000222282
		1090	0.000236353
		1090.59	0.000251203
		1091.18	0.000266865
		1091.76	0.000283377
		1092.35	0.000300776
		1092.94	0.0003191
		1093.53	0.000338389
		1094.12	0.000358683
		1094.71	0.000380023
		1095.29	0.000402453
		1095.88	0.000426015
		1096.47	0.000450755
		1097.06	0.000476717
		1097.65	0.000503948
		1098.24	0.000532496
		1098.82	0.000562409
		1099.41	0.000593735
		1100	0.000626525
		1100.59	0.000660829
		1101.18	0.000696699
		1101.76	0.000734185
		1102.35	0.000773341
		1102.94	0.00081422
		1103.53	0.000856874
		1104.12	0.000901357
		1104.71	0.000947723
		1105.29	0.000996026
		1105.88	0.00104632
		1106.47	0.00109866
		1107.06	0.0011531
		1107.65	0.00120969
		1108.24	0.00126849
		1108.82	0.00132954
		1109.41	0.00139291
		1110	0.00145864
		1110.59	0.00152679
		1111.18	0.0015974
		1111.76	0.00167051
		1112.35	0.00174619
		1112.94	0.00182448
		1113.53	0.00190541
		1114.12	0.00198903
		1114.71	0.00207539
		1115.29	0.00216452
		1115.88	0.00225646
		1116.47	0.00235123
		1117.06	0.00244889
		1117.65	0.00254944
		1118.24	0.00265292
		1118.82	0.00275935
		1119.41	0.00286876
		1120	0.00298115
		1120.59	0.00309654
		1121.18	0.00321494
		1121.76	0.00333635
		1122.35	0.00346078
		1122.94	0.00358823
		1123.53	0.00371867
		1124.12	0.00385211
		1124.71	0.00398853
		1125.29	0.0041279
		1125.88	0.0042702
		1126.47	0.00441539
		1127.06	0.00456345
		1127.65	0.00471433
		1128.24	0.00486798
		1128.82	0.00502434
		1129.41	0.00518337
		1130	0.005345
		1130.59	0.00550915
		1131.18	0.00567576
		1131.76	0.00584473
		1132.35	0.006016
		1132.94	0.00618945
		1133.53	0.00636499
		1134.12	0.00654253
		1134.71	0.00672194
		1135.29	0.00690312
		1135.88	0.00708593
		1136.47	0.00727026
		1137.06	0.00745597
		1137.65	0.00764292
		1138.24	0.00783097
		1138.82	0.00801997
		1139.41	0.00820977
		1140	0.0084002
		1140.59	0.0085911
		1141.18	0.00878231
		1141.76	0.00897366
		1142.35	0.00916496
		1142.94	0.00935603
		1143.53	0.0095467
		1144.12	0.00973678
		1144.71	0.00992606
		1145.29	0.0101144
		1145.88	0.0103015
		1146.47	0.0104873
		1147.06	0.0106715
		1147.65	0.0108539
		1148.24	0.0110343
		1148.82	0.0112126
		1149.41	0.0113885
		1150	0.0115618
		1150.59	0.0117323
		1151.18	0.0118999
		1151.76	0.0120642
		1152.35	0.0122252
		1152.94	0.0123826
		1153.53	0.0125362
		1154.12	0.0126858
		1154.71	0.0128312
		1155.29	0.0129724
		1155.88	0.0131089
		1156.47	0.0132408
		1157.06	0.0133678
		1157.65	0.0134898
		1158.24	0.0136065
		1158.82	0.0137179
		1159.41	0.0138237
		1160	0.0139239
		1160.59	0.0140183
		1161.18	0.0141068
		1161.76	0.0141892
		1162.35	0.0142655
		1162.94	0.0143355
		1163.53	0.0143991
		1164.12	0.0144563
		1164.71	0.0145069
		1165.29	0.0145509
		1165.88	0.0145882
		1166.47	0.0146188
		1167.06	0.0146426
		1167.65	0.0146596
		1168.24	0.0146697
		1168.82	0.014673
		1169.41	0.0146695
		1170	0.014659
		1170.59	0.0146417
		1171.18	0.0146176
		1171.76	0.0145867
		1172.35	0.014549
		1172.94	0.0145047
		1173.53	0.0144537
		1174.12	0.0143961
		1174.71	0.0143319
		1175.29	0.0142614
		1175.88	0.0141846
		1176.47	0.0141015
		1177.06	0.0140124
		1177.65	0.0139173
		1178.24	0.0138163
		1178.82	0.0137095
		1179.41	0.0135972
		1180	0.0134795
		1180.59	0.0133565
		1181.18	0.0132284
		1181.76	0.0130953
		1182.35	0.0129575
		1182.94	0.0128151
		1183.53	0.0126682
		1184.12	0.0125171
		1184.71	0.012362
		1185.29	0.012203
		1185.88	0.0120404
		1186.47	0.0118744
		1187.06	0.0117051
		1187.65	0.0115327
		1188.24	0.0113575
		1188.82	0.0111797
		1189.41	0.0109994
		1190	0.010817
		1190.59	0.0106325
		1191.18	0.0104462
		1191.76	0.0102583
		1192.35	0.010069
		1192.94	0.00987852
		1193.53	0.00968703
		1194.12	0.00949475
		1194.71	0.00930186
		1195.29	0.00910857
		1195.88	0.00891505
		1196.47	0.00872149
		1197.06	0.00852808
		1197.65	0.00833499
		1198.24	0.0081424
		1198.82	0.00795047
		1199.41	0.00775937
		1200	0.00756926
		1200.59	0.00738028
		1201.18	0.0071926
		1201.76	0.00700635
		1202.35	0.00682166
		1202.94	0.00663867
		1203.53	0.00645751
		1204.12	0.0062783
		1204.71	0.00610114
		1205.29	0.00592616
		1205.88	0.00575344
		1206.47	0.00558308
		1207.06	0.00541518
		1207.65	0.00524982
		1208.24	0.00508707
		1208.82	0.00492701
		1209.41	0.0047697
		1210	0.0046152
		1210.59	0.00446357
		1211.18	0.00431486
		1211.76	0.0041691
		1212.35	0.00402633
		1212.94	0.00388659
		1213.53	0.00374989
		1214.12	0.00361627
		1214.71	0.00348574
		1215.29	0.00335831
		1215.88	0.00323398
		1216.47	0.00311276
		1217.06	0.00299464
		1217.65	0.00287962
		1218.24	0.00276769
		1218.82	0.00265883
		1219.41	0.00255302
		1220	0.00245025
		1220.59	0.00235048
		1221.18	0.00225368
		1221.76	0.00215984
		1222.35	0.0020689
		1222.94	0.00198084
		1223.53	0.00189561
		1224.12	0.00181318
		1224.71	0.00173349
		1225.29	0.00165651
		1225.88	0.00158218
		1226.47	0.00151046
		1227.06	0.00144129
		1227.65	0.00137463
		1228.24	0.00131041
		1228.82	0.0012486
		1229.41	0.00118912
		1230	0.00113193
		1230.59	0.00107697
		1231.18	0.00102418
		1231.76	0.000973512
		1232.35	0.000924901
		1232.94	0.000878291
		1233.53	0.000833627
		1234.12	0.000790851
		1234.71	0.000749907
		1235.29	0.000710738
		1235.88	0.000673289
		1236.47	0.000637503
		1237.06	0.000603327
		1237.65	0.000570707
		1238.24	0.000539588
		1238.82	0.000509919
		1239.41	0.000481647
		1240	0.000454722
		1240.59	0.000429094
		1241.18	0.000404713
		1241.76	0.000381533
		1242.35	0.000359505
		1242.94	0.000338584
		1243.53	0.000318726
		1244.12	0.000299887
		1244.71	0.000282024
		1245.29	0.000265096
		1245.88	0.000249063
		1246.47	0.000233886
		1247.06	0.000219527
		1247.65	0.000205949
		1248.24	0.000193117
		1248.82	0.000180996
		1249.41	0.000169553
		1250	0.000158756
		1250.59	0.000148575
		1251.18	0.000138978
		1251.76	0.000129938
		1252.35	0.000121427
		1252.94	0.000113418
		1253.53	0.000105885
		1254.12	9.88047e-05
		1254.71	9.21527e-05
		1255.29	8.59066e-05
		1255.88	8.00447e-05
		1256.47	7.45464e-05
		1257.06	6.93918e-05
		1257.65	6.45621e-05
		1258.24	6.00392e-05
		1258.82	5.58058e-05
		1259.41	5.18456e-05
		IsoLine	IsoLine

## Sheet: Table S9
	Supplemental Table S9. Results of the glass (or liquid) thermometer for basaltic glasses and its mineral hosted melt inclusions of the studied PUBs
	Zone	Sample	Type	SiO2	TiO2	Al2O3	FeOt	MnO	MgO	CaO	Na2O	K2O	Cr2O3	P2O5	MEP (kbar)	T (°C), equation (16)	σ (°C)
	Segment 28	DY30II-1	basaltic galss	49.08	1.159	18.68	8.71018	0.147	6.02	12.14	2.67	0.13	0	0.102	8.80916	1176.04	26
	Segment 28	30IV-TVG04	basaltic galss	49.2	1.224	18.17	8.94413	0.152	6.17	11.98	2.68	0.2	0	0.105	7.94922	1174.98	26
	Mountain Jourdanne	30I-TVG02-1	basaltic galss	51.02	0.988	19.62	5.94776	0.108	5.58	11.09	3.78	0.2	0	0.118	9.36674	1146.68	26
	Mountain Jourdanne	30I-2-1-3MI	MI in Ol	51.317	1.114	16.038	7.83003	0.166	7.402	11.676	3.986	0.194	0.02	0.166	1.97354	1182.66	26
	Mountain Jourdanne	30I-2-1-25MI	MI in Ol	51.556	1.281	15.958	8.01442	0.103	7.369	11.483	3.944	0.19	0.01	0	2.29302	1168.28	26
	Mountain Jourdanne	30I-2-1-6MI	MI in Ol	51.228	1.182	16.588	7.78573	0.158	7.055	11.346	4.147	0.214	0.035	0.17	3.58402	1172.2	26
	Mountain Jourdanne	30I-2-1-8MI	MI in Ol	51.577	1.197	16.077	7.58954	0.13	7.243	11.776	3.944	0.178	0.032	0.17	1.96203	1170.32	26
	Mountain Jourdanne	30I-2-1-9MI	MI in Ol	51.304	1.064	16.278	7.85153	0.118	7.399	11.364	4.005	0.252	0.026	0.25	2.78269	1172.58	26
	Mountain Jourdanne	30I-2-1-10MI	MI in Ol	51.532	1.016	16.528	8.11572	0.125	6.992	10.854	4.154	0.307	0.027	0.255	3.63306	1163.57	26
	Mountain Jourdanne	30I-2-1-11-2MI	MI in Ol	51.35	1.046	16.297	7.86053	0.185	7.142	11.324	4.156	0.204	0.027	0.316	2.80701	1168.01	26
	Mountain Jourdanne	30I-2-1-12MI	MI in Ol	50.926	0.96	16.091	8.01723	0.154	7.467	12.005	3.835	0.192	0.049	0.213	1.71018	1163.09	26
	Mountain Jourdanne	30I-2-1-13MI	MI in Ol	51.468	1.179	16.618	7.58164	0.114	7.042	11.239	4.166	0.221	0.047	0.238	3.66774	1176.33	26
	Mountain Jourdanne	30I-2-1-14-1MI	MI in Ol	51.395	1.013	16.826	7.53264	0.192	7.093	11.179	4.233	0.265	0.023	0.16	3.84336	1179.33	26
	Mountain Jourdanne	30I-2-1-14-2MI	MI in Ol	51.487	1.09	16.682	7.55514	0.156	7.133	11.098	4.229	0.217	0.015	0.25	3.85803	1179.91	26
	Mountain Jourdanne	30I-2-1-14-3MI	MI in Ol	51.142	1.108	15.972	8.17592	0.184	7.711	11.154	4.048	0.239	0.008	0.161	2.64365	1172.33	26
	Mountain Jourdanne	30I-2-1-15MI	MI in Ol	51.545	0.998	16.498	7.67074	0.133	7.149	11.516	4.037	0.212	0.009	0.146	2.85621	1170.73	26
	Mountain Jourdanne	30I-2-1-18MI	MI in Ol	51.352	1.063	16.457	7.87993	0.129	7.277	11.231	4.02	0.22	0.034	0.249	3.45619	1173.52	26
	Mountain Jourdanne	30I-2-1-19MI	MI in Ol	51.852	1.118	16.657	7.44194	0.148	6.972	11.124	4.188	0.211	0.048	0.156	3.70256	1178.14	26
	Mountain Jourdanne	30I-2-1-20MI	MI in Ol	51.903	1.017	16.919	7.38824	0.094	6.947	10.931	4.258	0.237	0.045	0.179	4.25985	1181.5	26
	Mountain Jourdanne	30I-2-1-22MI	MI in Ol	51.262	0.958	16.442	7.90093	0.127	7.27	11.421	4.104	0.242	0.01	0.173	2.83208	1168.01	26
	Mountain Jourdanne	30I-2-1-23MI	MI in Ol	51.807	1.035	16.485	7.58944	0.138	7.008	11.086	4.239	0.207	0.055	0.264	3.31367	1173.45	26
	Mountain Jourdanne	30I-2-1-24MI	MI in Ol	51.618	1.259	16.668	7.51184	0.133	6.938	11.261	4.081	0.248	0.068	0.13	3.76392	1176.03	26
	Segment 27	34TVG-6MI	MI in Pl	49.4772	1.01541	15.7703	8.55839	0.212038	8.35782	13.4309	2.4166	0.039216	0.044866	0	1.49563	1179.9	26
	Segment 28	30TVG-4-2MI	MI in Pl	49.1515	0.89986	16.3161	7.605	0.21895	9.44243	14.2209	2.04789	0.0191	0.068815	0	2.22339	1204.45	26
	Mountain Jourdanne	30I-2-1-1MI	MI in Pl	51.6978	1.33682	16.7895	7.5205	0.10901	6.61494	10.8075	3.40298	0.23864	0.030385	0	5.2798	1166.6	26
	Mountain Jourdanne	30I-2-1-2MI	MI in Pl	51.0463	1.36411	16.7362	7.5084	0.163427	6.55861	10.5763	4.04288	0.249208	0.053738	0	5.67344	1169.77	26
	Mountain Jourdanne	30I-2-1-2MI-2	MI in Pl	51.4126	1.19759	16.6681	7.47679	0.1368	6.53155	10.8338	3.99381	0.23896	0.06648	0	4.51129	1160.48	26
	Mountain Jourdanne	30I-2-1-3 mi-1	MI in Pl	51.1618	1.40091	16.4191	7.8181	0.166104	6.25738	10.8794	4.35009	0.275686	0.056791	0	3.7961	1151.66	26
	Mountain Jourdanne	30I-2-1-3 mi-2	MI in Pl	51.2222	1.3001	16.7699	7.80885	0.1449	6.57418	10.7318	4.22793	0.259352	0.034224	0	4.88214	1164.09	26
	Mountain Jourdanne	30I-2-1-11mi	MI in Pl	50.7194	1.15883	17.3015	7.31385	0.13737	7.03142	10.8684	4.22874	0.19761	0.053454	0	6.12684	1180.58	26
	Mountain Jourdanne	30I-2-1-12MI	MI in Pl	51.3781	1.2751	16.6578	7.36553	0.136806	6.51148	10.962	4.18866	0.219918	0.032	0	4.29965	1158.75	26
	Mountain Jourdanne	30I-2-1-13MI-1	MI in Pl	51.3236	1.25573	16.8873	7.44416	0.143122	6.72008	10.8741	4.21514	0.215348	0.071302	0	4.96957	1166.87	26
	Mountain Jourdanne	30I-2-1-13MI-2	MI in Pl	51.0904	1.22823	16.8439	7.37783	0.109368	6.65098	11.0946	4.10901	0.255016	0.014624	0	4.50816	1162.31	26
	Mountain Jourdanne	30I-2-1-13MI-3	MI in Pl	51.0783	1.20265	16.8547	7.34905	0.173112	6.64695	10.9476	4.33099	0.224096	0.089088	0	4.70888	1163.76	26
	Mountain Jourdanne	30I-2-1-13MI-4	MI in Pl	50.9043	1.28125	16.9091	7.44482	0.13465	6.73615	10.9369	4.18145	0.2318	0.050875	0	5.30349	1170.12	26
	Mountain Jourdanne	30I-2-1-16mi-1	MI in Pl	51.8564	1.1278	16.877	7.14586	0.120782	6.68414	10.8218	4.16616	0.227074	0.04366	0	4.63045	1162.62	26
	Mountain Jourdanne	30I-2-1-16mi-2	MI in Pl	51.334	1.1656	17.107	7.2736	0.17404	6.89031	11.2283	4.19968	0.249588	0.054472	0	4.77854	1167.79	26
	Mountain Jourdanne	30I-2-1-16mi-3	MI in Pl	51.4208	1.17328	17.0529	7.35644	0.16744	6.85412	10.7852	4.25712	0.2202	0.03164	0	5.50447	1172.55	26
	Mountain Jourdanne	30I-2-1-16mi-4	MI in Pl	51.6803	1.19043	16.8916	7.13558	0.117632	6.71365	10.057	4.45271	0.261345	0.050922	0	5.84729	1172.15	26
	Mountain Jourdanne	30I-2-1-17MI	MI in Pl	51.4383	1.43669	16.9943	7.33512	0.169392	6.81241	11.0902	4.23066	0.229928	0.02736	0	5.02626	1168.77	26
	Mountain Jourdanne	30I-2-1-22MI	MI in Pl	51.0606	1.2166	16.6829	7.9988	0.1691	6.54235	11.1666	4.37255	0.2129	0.05885	0	4.04456	1158.11	26
	Mountain Jourdanne	30I-2-1-1	MI in Pl	51.2316	1.03197	16.6849	6.94676	0.136628	6.52796	10.4234	4.02976	0.278744	0.062436	0.149954	4.8005	1161.45	26
	Mountain Jourdanne	30I-2-1-2	MI in Pl	51.2514	1.067	16.6315	7.13753	0.13717	6.51096	10.3241	4.28743	0.269744	0.020028	0.182578	4.66238	1160.89	26
	Mountain Jourdanne	30I-2-1-3	MI in Pl	51.0782	1.0776	16.6034	7.52875	0.15145	6.4414	10.0347	4.47605	0.282	0.0238	0.2071	4.9829	1162.4	26
	Mountain Jourdanne	30I-2-1-4	MI in Pl	49.8624	1.50024	16.2187	8.7682	0.174956	6.10026	9.85407	4.6566	0.3641	0.016762	0.185368	5.09897	1160.58	26
	Mountain Jourdanne	30I-2-1-5	MI in Pl	50.6398	0.85156	16.6732	7.3593	0.136328	6.50324	10.4483	4.30265	0.265672	0.029264	0.105008	4.62113	1160.68	26
	Mountain Jourdanne	30I-2-1-6-1	MI in Pl	51.796	0.90718	16.6377	7.2221	0.106785	6.50276	10.1675	4.34239	0.319655	0.044415	0.19111	4.37461	1157.94	26
	Mountain Jourdanne	30I-2-1-6-2	MI in Pl	50.6415	0.995086	16.8005	7.44361	0.169988	6.65908	10.1018	4.33847	0.293236	0.002802	0.236566	5.4898	1169.9	26
	Mountain Jourdanne	30I-2-1-7	MI in Pl	50.8482	0.872332	16.6624	7.17047	0.12218	6.47554	10.5152	4.20337	0.278756	0.043148	0.137506	4.45289	1158.43	26
	Mountain Jourdanne	30I-2-1-8	MI in Pl	50.2375	0.930744	17.2069	6.85302	0.129652	6.98709	10.8184	3.99486	0.267688	0.050676	0.117566	5.79203	1177.28	26
	Mountain Jourdanne	30I-2-1-9-1	MI in Pl	50.8648	1.17745	16.3618	7.39097	0.16975	6.2512	10.2439	4.42475	0.2902	0.01261	0.229	4.26628	1154.85	26
	Mountain Jourdanne	30I-2-1-9-2	MI in Pl	50.9347	1.16678	16.3259	7.69458	0.12804	6.17554	10.1731	4.41699	0.30766	0	0.18729	4.21235	1153.12	26
	Mountain Jourdanne	30I-2-1-10	MI in Pl	50.4176	1.10968	16.7536	7.42733	0.17914	6.63535	10.3257	4.44544	0.277572	0.027318	0.162068	5.27059	1168.73	26
	Mountain Jourdanne	30I-2-1-10-2	MI in Pl	50.376	1.17787	16.8802	7.20103	0.194014	6.6803	9.98659	4.36287	0.310356	0.057412	0.203126	6.10468	1174.66	26
	Mountain Jourdanne	30I-2-1-11	MI in Pl	50.4715	1.16368	16.7855	7.44319	0.10807	6.62168	9.68505	4.68133	0.375966	0.020548	0.220084	5.83156	1171.99	26
	Mountain Jourdanne	30I-2-1-12	MI in Pl	50.0203	1.15954	16.5448	7.8715	0.13808	6.40598	10.3969	4.24774	0.275272	0.029832	0.270296	4.8632	1164.23	26
	Mountain Jourdanne	30I-2-1-13	MI in Pl	51.8702	1.18009	16.044	8.05039	0.13077	5.90544	9.53606	4.27778	0.363288	0.011726	0.224578	5.08746	1148.91	26
	Mountain Jourdanne	30I-2-1-14	MI in Pl	50.998	1.18962	16.6227	7.37952	0.143744	6.46872	10.2359	4.46035	0.320016	0.031126	0.221754	4.17371	1161.43	26
	Mountain Jourdanne	30I-2-1-15	MI in Pl	50.6596	1.0368	16.9882	7.4802	0.10101	6.77867	10.3911	4.56236	0.317208	0.035594	0.182984	4.76586	1170.78	26
	Mountain Jourdanne	30I-2-1-16	MI in Pl	50.935	1.04684	16.4728	7.44767	0.115848	6.32082	10.4932	4.38087	0.243742	0.041976	0.201364	5.34554	1155	26
	Mountain Jourdanne	30I-2-1-17	MI in Pl	50.5232	1.16084	15.9519	9.09028	0.1802	5.79998	9.85355	4.52902	0.375688	0.017064	0.239112	4.19601	1146.19	26
	Mountain Jourdanne	30I-2-1-18	MI in Pl	51.5836	0.839089	16.4546	7.68086	0.171157	6.32885	9.77639	4.63472	0.308489	0.037869	0.046275	3.87775	1156.27	26
	Mountain Jourdanne	30I-2-1-19	MI in Pl	51.3498	0.771143	16.7007	7.27401	0.150973	6.5224	9.62845	4.72198	0.381502	0.034524	0.147686	4.40348	1161.55	26
	Mountain Jourdanne	30I-2-1-20	MI in Pl	50.1997	1.19151	16.894	6.90974	0.147208	6.70602	10.292	4.37818	0.283696	0.08056	0.195624	5.8345	1173.35	26
	Mountain Jourdanne	30I-2-1-21	MI in Pl	51.1722	1.09394	16.0533	8.62369	0.164838	5.90825	9.43992	4.71343	0.376683	0.015024	0.204864	4.21203	1149.8	26
																1146.19
																1181.5
