# Supplementary material for: Magmatic processes within the plumbing system of the ultraslow-spreading southwest Indian ridge: constraints from olivine, plagioclase and melt inclusions
Source: Springer Nature journal article supplement (doi:10.1007/s00410-024-02098-0), 2024-02-22
Supplement: MOESM11 [file 410_2024_2098_MOESM11_ESM.xls]

## Sheet: PlotDat1
Source sheet	Sheet7	1020	6.80837e-06	1164	0	1020	0
Plot name	ProbDens1	1020.94	7.37604e-06	1172	0	1339.06	0
Plot Type	16	1021.88	7.98652e-06	1172	15
1st free col	9	1022.82	8.63101e-06	1164	15
Sigma Level	1	1023.76	9.32339e-06	1164	0
Absolute Errs	TRUE	1024.71	1.00669e-05	ErrBox	ErrBox
Symbol Type	1	1025.65	1.08649e-05	1172	0
Inverse Plot	FALSE	1026.59	1.1721e-05	1180	0
Color Plot	TRUE	1027.53	1.2639e-05	1180	1
3D plot	FALSE	1028.47	1.36229e-05	1172	1
Linear	FALSE	1029.41	1.46769e-05	1172	0
Data Range	AI4:AJ89	1030.35	1.58056e-05	ErrBox	ErrBox
Filled Symbols	TRUE	1031.29	1.70136e-05	1180	0
ConcAge	FALSE	1032.24	1.83059e-05	1188	0
ConcSwap	FALSE	1033.18	1.96878e-05	1188	10
1st Symbol-row	1	1034.12	2.11647e-05	1180	10
		1035.06	2.27424e-05	1180	0
		1036	2.44271e-05	ErrBox	ErrBox
		1036.94	2.6225e-05	1188	0
		1037.88	2.81431e-05	1196	0
		1038.82	3.01882e-05	1196	10
		1039.76	3.23678e-05	1188	10
		1040.71	3.46897e-05	1188	0
		1041.65	3.7162e-05	ErrBox	ErrBox
		1042.59	3.9793e-05	1196	0
		1043.53	4.25919e-05	1204	0
		1044.47	4.55677e-05	1204	48
		1045.41	4.87303e-05	1196	48
		1046.35	5.20898e-05	1196	0
		1047.29	5.56566e-05	ErrBox	ErrBox
		1048.24	5.9442e-05	1204	0
		1049.18	6.34572e-05	1212	0
		1050.12	6.77142e-05	1212	2
		1051.06	7.22256e-05	1204	2
		1052	7.70041e-05	1204	0
		1052.94	8.20633e-05	ErrBox	ErrBox
		1053.88	8.7417e-05
		1054.82	9.30798e-05
		1055.76	9.90665e-05
		1056.71	0.000105393
		1057.65	0.000112075
		1058.59	0.000119129
		1059.53	0.000126572
		1060.47	0.000134422
		1061.41	0.000142698
		1062.35	0.000151418
		1063.29	0.000160602
		1064.24	0.00017027
		1065.18	0.000180441
		1066.12	0.000191139
		1067.06	0.000202383
		1068	0.000214197
		1068.94	0.000226603
		1069.88	0.000239624
		1070.82	0.000253285
		1071.76	0.000267611
		1072.71	0.000282625
		1073.65	0.000298353
		1074.59	0.000314822
		1075.53	0.000332057
		1076.47	0.000350087
		1077.41	0.000368937
		1078.35	0.000388635
		1079.29	0.000409211
		1080.24	0.000430691
		1081.18	0.000453105
		1082.12	0.000476481
		1083.06	0.00050085
		1084	0.00052624
		1084.94	0.00055268
		1085.88	0.000580202
		1086.82	0.000608834
		1087.76	0.000638605
		1088.71	0.000669547
		1089.65	0.000701689
		1090.59	0.00073506
		1091.53	0.000769689
		1092.47	0.000805606
		1093.41	0.000842839
		1094.35	0.000881418
		1095.29	0.000921369
		1096.24	0.00096272
		1097.18	0.0010055
		1098.12	0.00104973
		1099.06	0.00109544
		1100	0.00114265
		1100.94	0.00119139
		1101.88	0.00124169
		1102.82	0.00129355
		1103.76	0.001347
		1104.71	0.00140207
		1105.65	0.00145876
		1106.59	0.0015171
		1107.53	0.0015771
		1108.47	0.00163878
		1109.41	0.00170214
		1110.35	0.0017672
		1111.29	0.00183396
		1112.24	0.00190243
		1113.18	0.00197262
		1114.12	0.00204453
		1115.06	0.00211815
		1116	0.00219349
		1116.94	0.00227055
		1117.88	0.0023493
		1118.82	0.00242975
		1119.76	0.00251189
		1120.71	0.00259569
		1121.65	0.00268114
		1122.59	0.00276822
		1123.53	0.00285691
		1124.47	0.00294719
		1125.41	0.00303902
		1126.35	0.00313237
		1127.29	0.00322721
		1128.24	0.00332349
		1129.18	0.00342119
		1130.12	0.00352025
		1131.06	0.00362064
		1132	0.00372229
		1132.94	0.00382515
		1133.88	0.00392918
		1134.82	0.0040343
		1135.76	0.00414047
		1136.71	0.0042476
		1137.65	0.00435564
		1138.59	0.00446451
		1139.53	0.00457414
		1140.47	0.00468445
		1141.41	0.00479536
		1142.35	0.00490679
		1143.29	0.00501865
		1144.24	0.00513085
		1145.18	0.0052433
		1146.12	0.00535591
		1147.06	0.00546859
		1148	0.00558123
		1148.94	0.00569374
		1149.88	0.00580601
		1150.82	0.00591794
		1151.76	0.00602943
		1152.71	0.00614037
		1153.65	0.00625064
		1154.59	0.00636015
		1155.53	0.00646878
		1156.47	0.00657642
		1157.41	0.00668296
		1158.35	0.00678828
		1159.29	0.00689227
		1160.24	0.00699483
		1161.18	0.00709584
		1162.12	0.00719518
		1163.06	0.00729274
		1164	0.00738842
		1164.94	0.0074821
		1165.88	0.00757367
		1166.82	0.00766303
		1167.76	0.00775007
		1168.71	0.00783469
		1169.65	0.00791677
		1170.59	0.00799623
		1171.53	0.00807297
		1172.47	0.00814689
		1173.41	0.00821789
		1174.35	0.00828588
		1175.29	0.00835079
		1176.24	0.00841253
		1177.18	0.00847101
		1178.12	0.00852617
		1179.06	0.00857792
		1180	0.0086262
		1180.94	0.00867095
		1181.88	0.00871211
		1182.82	0.00874961
		1183.76	0.00878342
		1184.71	0.00881348
		1185.65	0.00883975
		1186.59	0.0088622
		1187.53	0.00888079
		1188.47	0.00889549
		1189.41	0.00890629
		1190.35	0.00891317
		1191.29	0.00891612
		1192.24	0.00891512
		1193.18	0.00891019
		1194.12	0.00890132
		1195.06	0.00888852
		1196	0.00887181
		1196.94	0.00885121
		1197.88	0.00882674
		1198.82	0.00879844
		1199.76	0.00876633
		1200.71	0.00873046
		1201.65	0.00869087
		1202.59	0.00864761
		1203.53	0.00860074
		1204.47	0.00855032
		1205.41	0.00849641
		1206.35	0.00843907
		1207.29	0.00837838
		1208.24	0.00831442
		1209.18	0.00824726
		1210.12	0.00817699
		1211.06	0.00810369
		1212	0.00802746
		1212.94	0.00794839
		1213.88	0.00786657
		1214.82	0.00778211
		1215.76	0.0076951
		1216.71	0.00760566
		1217.65	0.00751388
		1218.59	0.00741987
		1219.53	0.00732375
		1220.47	0.00722563
		1221.41	0.00712561
		1222.35	0.00702382
		1223.29	0.00692036
		1224.24	0.00681536
		1225.18	0.00670892
		1226.12	0.00660117
		1227.06	0.00649222
		1228	0.00638219
		1228.94	0.00627118
		1229.88	0.00615932
		1230.82	0.00604673
		1231.76	0.0059335
		1232.71	0.00581977
		1233.65	0.00570562
		1234.59	0.00559118
		1235.53	0.00547656
		1236.47	0.00536185
		1237.41	0.00524716
		1238.35	0.00513259
		1239.29	0.00501825
		1240.24	0.00490422
		1241.18	0.00479061
		1242.12	0.0046775
		1243.06	0.00456498
		1244	0.00445314
		1244.94	0.00434207
		1245.88	0.00423183
		1246.82	0.00412251
		1247.76	0.00401419
		1248.71	0.00390693
		1249.65	0.0038008
		1250.59	0.00369586
		1251.53	0.00359218
		1252.47	0.00348981
		1253.41	0.00338881
		1254.35	0.00328922
		1255.29	0.0031911
		1256.24	0.0030945
		1257.18	0.00299944
		1258.12	0.00290597
		1259.06	0.00281412
		1260	0.00272392
		1260.94	0.00263541
		1261.88	0.0025486
		1262.82	0.00246352
		1263.76	0.00238019
		1264.71	0.00229861
		1265.65	0.00221882
		1266.59	0.00214081
		1267.53	0.00206459
		1268.47	0.00199017
		1269.41	0.00191754
		1270.35	0.00184672
		1271.29	0.00177769
		1272.24	0.00171046
		1273.18	0.00164501
		1274.12	0.00158133
		1275.06	0.00151942
		1276	0.00145926
		1276.94	0.00140083
		1277.88	0.00134412
		1278.82	0.00128911
		1279.76	0.00123578
		1280.71	0.00118411
		1281.65	0.00113407
		1282.59	0.00108565
		1283.53	0.00103881
		1284.47	0.000993536
		1285.41	0.000949793
		1286.35	0.000907556
		1287.29	0.000866794
		1288.24	0.00082748
		1289.18	0.000789583
		1290.12	0.000753071
		1291.06	0.000717915
		1292	0.000684083
		1292.94	0.000651542
		1293.88	0.000620261
		1294.82	0.000590208
		1295.76	0.00056135
		1296.71	0.000533654
		1297.65	0.00050709
		1298.59	0.000481623
		1299.53	0.000457223
		1300.47	0.000433857
		1301.41	0.000411493
		1302.35	0.000390101
		1303.29	0.000369649
		1304.24	0.000350105
		1305.18	0.000331441
		1306.12	0.000313625
		1307.06	0.000296628
		1308	0.000280422
		1308.94	0.000264978
		1309.88	0.000250268
		1310.82	0.000236263
		1311.76	0.000222939
		1312.71	0.000210268
		1313.65	0.000198224
		1314.59	0.000186783
		1315.53	0.00017592
		1316.47	0.000165611
		1317.41	0.000155834
		1318.35	0.000146565
		1319.29	0.000137783
		1320.24	0.000129467
		1321.18	0.000121596
		1322.12	0.00011415
		1323.06	0.000107109
		1324	0.000100456
		1324.94	9.41725e-05
		1325.88	8.82404e-05
		1326.82	8.26432e-05
		1327.76	7.73648e-05
		1328.71	7.23896e-05
		1329.65	6.77026e-05
		1330.59	6.32894e-05
		1331.53	5.91361e-05
		1332.47	5.52295e-05
		1333.41	5.15568e-05
		1334.35	4.81057e-05
		1335.29	4.48646e-05
		1336.24	4.18222e-05
		1337.18	3.89679e-05
		1338.12	3.62913e-05
		1339.06	3.37827e-05
		IsoLine	IsoLine

## Sheet: Table S10
	Supplemental Table S10. Results of the olivine-liquid thermometer for basaltic matrix glasses and its mineral hosted melt inclusions of the studied PUBs.
	Zone	Sample	Spot-MI	Type	SiO2	TiO2	Al2O3	FeOt	MnO	MgO	CaO	Na2O	K2O	Cr2O3	P2O5		Spot-Ol	No.	SiO2	TiO2	Al2O3	FeO	MnO	MgO	CaO	Na2O	K2O	Cr2O3	P2O5	Fo	MEP (kbar)	KD((Fe-Mg)Ol-liq)		T (°C), equation 22	σ (°C)	note
	Mountain Jourdanne	30I-TVG02-1	30I-2-1-25MI	MI in Ol	51.556	1.281	15.958	8.01458	0.103	7.369	11.483	3.944	0.19	0.01	0		30I-2-1-25	258	40.128	0	0.033	13.367	0.237	46.73	0.279	0	0.031	0.015		85.9585	2.27892	0.263006		1185.12	43	near equilibrium
	Mountain Jourdanne	30I-TVG02-1	30I-2-1-6MI	MI in Ol	51.228	1.182	16.588	7.78588	0.158	7.055	11.346	4.147	0.214	0.035	0.17		30I-2-1-6OL	72	39.508	0	0.03	13.124	0.274	45.553	0.282	0.019	0	0.039	0.013	85.8338	3.57901	0.261059		1193.3	43	near equilibrium
	Mountain Jourdanne	30I-TVG02-1	30I-2-1-9MI	MI in Ol	51.304	1.064	16.278	7.85168	0.118	7.399	11.364	4.005	0.252	0.026	0.25		30I-2-1-9OL	76	39.576	0	0.026	12.777	0.177	45.548	0.304	0	0	0.017	0.074	86.2384	2.78088	0.264344		1195.81	43	near equilibrium
	Mountain Jourdanne	30I-TVG02-1	30I-2-1-10MI	MI in Ol	51.532	1.016	16.528	8.11588	0.125	6.992	10.854	4.154	0.307	0.027	0.255		30I-2-1-10OL	78	39.222	0.002	0.052	13.784	0.247	44.892	0.308	0	0	0.004	0.112	85.079	3.63318	0.264528		1186.26	43	near equilibrium
	Mountain Jourdanne	30I-TVG02-1	30I-2-1-11-2MI	MI in Ol	51.35	1.046	16.297	7.86068	0.185	7.142	11.324	4.156	0.204	0.027	0.316		30I-2-1-11-OL	81	39.175	0	0.04	13.275	0.187	44.967	0.308	0.006	0	0.068	0	85.6181	2.80317	0.268226		1191.19	43	near equilibrium
	Mountain Jourdanne	30I-TVG02-1	30I-2-1-12MI	MI in Ol	50.926	0.96	16.091	8.01738	0.154	7.467	12.005	3.835	0.192	0.049	0.213		30I-2-1-12OL	84	39.52	0	0.043	12.919	0.233	45.561	0.316	0	0	0.102	0	86.0602	1.71018	0.264088		1185.37	43	near equilibrium
	Mountain Jourdanne	30I-TVG02-1	30I-2-1-13MI	MI in Ol	51.468	1.179	16.618	7.58178	0.114	7.042	11.239	4.166	0.221	0.047	0.238		30I-2-1-13OL	86	39.55	0.048	0.052	12.977	0.168	45.72	0.305	0	0	0.05	0.009	86.1091	3.65941	0.263629		1198.32	43	near equilibrium
	Mountain Jourdanne	30I-TVG02-1	30I-2-1-14-1MI	MI in Ol	51.395	1.013	16.826	7.53278	0.192	7.093	11.179	4.233	0.265	0.023	0.16		30I-2-1-14OL	90	39.393	0	0.039	12.674	0.224	45.65	0.29	0.004	0.012	0.025	0	86.3156	3.83143	0.261425		1203.12	43	near equilibrium
	Mountain Jourdanne	30I-TVG02-1	30I-2-1-14-2MI	MI in Ol	51.487	1.09	16.682	7.55528	0.156	7.133	11.098	4.229	0.217	0.015	0.25		30I-2-1-14OL	90	39.393	0	0.039	12.674	0.224	45.65	0.29	0.004	0.012	0.025	0	86.3156	3.84779	0.262117		1203	43	near equilibrium
	Mountain Jourdanne	30I-TVG02-1	30I-2-1-14-3MI	MI in Ol	51.142	1.108	15.972	8.17608	0.184	7.711	11.154	4.048	0.239	0.008	0.161		30I-2-1-14OL	90	39.393	0	0.039	12.674	0.224	45.65	0.29	0.004	0.012	0.025	0	86.3156	2.64658	0.261841		1195.12	43	near equilibrium
	Mountain Jourdanne	30I-TVG02-1	30I-2-1-15MI	MI in Ol	51.545	0.998	16.498	7.67088	0.133	7.149	11.516	4.037	0.212	0.009	0.146		30I-2-1-15OL	92	39.43	0.02	0.046	12.897	0.19	45.396	0.289	0.017	0	0.037	0	86.0766	2.84995	0.264771		1193.57	43	near equilibrium
	Mountain Jourdanne	30I-TVG02-1	30I-2-1-18MI	MI in Ol	51.352	1.063	16.457	7.88008	0.129	7.277	11.231	4.02	0.22	0.034	0.249		30I-2-1-18OL	98	39.187	0.035	0.044	13.006	0.19	45.284	0.324	0.001	0.002	0.029	0	85.9471	3.45242	0.265229		1195.43	43	near equilibrium
	Mountain Jourdanne	30I-TVG02-1	30I-2-1-19MI	MI in Ol	51.852	1.118	16.657	7.44208	0.148	6.972	11.124	4.188	0.211	0.048	0.156		30I-2-1-19OL	101	39.594	0.014	0.04	12.918	0.212	45.895	0.283	0	0	0.054	0.017	86.1678	3.68507	0.263689		1200.24	43	near equilibrium
	Mountain Jourdanne	30I-TVG02-1	30I-2-1-20MI	MI in Ol	51.903	1.017	16.919	7.38838	0.094	6.947	10.931	4.258	0.237	0.045	0.179		30I-2-1-20OL	103	39.429	0	0.026	12.706	0.252	45.52	0.245	0.005	0.007	0.055	0.056	86.2266	4.24638	0.262455		1205.42	43	near equilibrium
	Mountain Jourdanne	30I-TVG02-1	30I-2-1-22MI	MI in Ol	51.262	0.958	16.442	7.90108	0.127	7.27	11.421	4.104	0.242	0.01	0.173		30I-2-1-22OL	107	39.049	0.018	0.023	13.048	0.229	45.731	0.337	0	0.023	0.009	0.026	85.9913	2.82901	0.262531		1190.14	43	near equilibrium
	Mountain Jourdanne	30I-TVG02-1	30I-2-1-23MI	MI in Ol	51.807	1.035	16.485	7.58958	0.138	7.008	11.086	4.239	0.207	0.055	0.264		30I-2-1-23OL	109	39.433	0.007	0.038	12.953	0.229	45.37	0.295	0.01	0	0.016	0.009	85.9823	3.30609	0.26362		1196.79	43	near equilibrium
	Mountain Jourdanne	30I-TVG02-1	30I-2-1-24MI	MI in Ol	51.618	1.259	16.668	7.51198	0.133	6.938	11.261	4.081	0.248	0.068	0.13		30I-2-1-24OL	111	39.519	0.037	0.036	12.925	0.238	45.406	0.298	0.001	0.011	0.06	0.022	86.0091	3.75255	0.262904		1197.26	43	near equilibrium
	Mountain Jourdanne	30I-TVG02-1	30I-2-1-8	MI in Pl	50.2375	0.930744	17.2069	6.85302	0.129652	6.98709	10.8184	3.99486	0.267688	0.050676	0.117566		30I-2-1-25	258	40.128	0	0.033	13.367	0.237	46.73	0.279	0	0.031	0.015		85.9585	5.79203	0.291643		1201.06	43
	Mountain Jourdanne	30I-TVG02-1	30I-2-1-10	MI in Pl	50.4176	1.10968	16.7536	7.42733	0.17914	6.63535	10.3257	4.44544	0.277572	0.027318	0.162068		30I-2-1-25	258	40.128	0	0.033	13.367	0.237	46.73	0.279	0	0.031	0.015		85.9585	5.27059	0.255546		1189.88	43	near equilibrium
	Mountain Jourdanne	30I-TVG02-1	30I-2-1-20	MI in Pl	50.1997	1.19151	16.894	6.90974	0.147208	6.70602	10.292	4.37818	0.283696	0.08056	0.195624		30I-2-1-25	258	40.128	0	0.033	13.367	0.237	46.73	0.279	0	0.031	0.015		85.9585	5.8345	0.277614		1196.66	43
	Mountain Jourdanne	30I-TVG02-1	30I-TVG02-1	basaltic matrix glass	51.02	0.988	19.62	5.94776	0.108	5.58	11.09	3.78	0.2	0	0.118		30I-2-1-25	258	40.128	0	0.033	13.367	0.237	46.73	0.279	0	0.031	0.015		85.9585	9.36674	0.268361		1166.41	43	near equilibrium
	Mountain Jourdanne	30I-TVG02-1	30I-2-1-11mi	MI in Pl	50.7194	1.15883	17.3015	7.31385	0.13737	7.03142	10.8684	4.22874	0.19761	0.053454	0		30I-2-1-6OL	72	39.508	0	0.03	13.124	0.274	45.553	0.282	0.019	0	0.039	0.013	85.8338	6.12684	0.276979		1202.12	43
	Mountain Jourdanne	30I-TVG02-1	30I-2-1-7	MI in Pl	50.8482	0.872332	16.6624	7.17047	0.12218	6.47554	10.5152	4.20337	0.278756	0.043148	0.137506		30I-2-1-6OL	72	39.508	0	0.03	13.124	0.274	45.553	0.282	0.019	0	0.039	0.013	85.8338	4.45289	0.260182		1180.99	43	near equilibrium
	Mountain Jourdanne	30I-TVG02-1	30I-2-1-8	MI in Pl	50.2375	0.930744	17.2069	6.85302	0.129652	6.98709	10.8184	3.99486	0.267688	0.050676	0.117566		30I-2-1-6OL	72	39.508	0	0.03	13.124	0.274	45.553	0.282	0.019	0	0.039	0.013	85.8338	5.79203	0.29374		1202.16	43
	Mountain Jourdanne	30I-TVG02-1	30I-2-1-10-2	MI in Pl	50.376	1.17787	16.8802	7.20103	0.194014	6.6803	9.98659	4.36287	0.310356	0.057412	0.203126		30I-2-1-6OL	72	39.508	0	0.03	13.124	0.274	45.553	0.282	0.019	0	0.039	0.013	85.8338	6.10468	0.26727		1198.35	43	near equilibrium
	Mountain Jourdanne	30I-TVG02-1	30I-2-1-20	MI in Pl	50.1997	1.19151	16.894	6.90974	0.147208	6.70602	10.292	4.37818	0.283696	0.08056	0.195624		30I-2-1-6OL	72	39.508	0	0.03	13.124	0.274	45.553	0.282	0.019	0	0.039	0.013	85.8338	5.8345	0.27961		1197.75	43
	Mountain Jourdanne	30I-TVG02-1	30I-TVG02-1	basaltic matrix glass	51.02	0.988	19.62	5.94776	0.108	5.58	11.09	3.78	0.2	0	0.118		30I-2-1-6OL	72	39.508	0	0.03	13.124	0.274	45.553	0.282	0.019	0	0.039	0.013	85.8338	9.36674	0.27029		1167.41	43
	Mountain Jourdanne	30I-TVG02-1	30I-2-1-8	MI in Pl	50.2375	0.930744	17.2069	6.85302	0.129652	6.98709	10.8184	3.99486	0.267688	0.050676	0.117566		30I-2-1-9OL	76	39.576	0	0.026	12.777	0.177	45.548	0.304	0	0	0.017	0.074	86.2384	5.79203	0.286005		1201.48	43
	Mountain Jourdanne	30I-TVG02-1	30I-2-1-10-2	MI in Pl	50.376	1.17787	16.8802	7.20103	0.194014	6.6803	9.98659	4.36287	0.310356	0.057412	0.203126		30I-2-1-9OL	76	39.576	0	0.026	12.777	0.177	45.548	0.304	0	0	0.017	0.074	86.2384	6.10468	0.260232		1197.68	43	near equilibrium
	Mountain Jourdanne	30I-TVG02-1	30I-2-1-20	MI in Pl	50.1997	1.19151	16.894	6.90974	0.147208	6.70602	10.292	4.37818	0.283696	0.08056	0.195624		30I-2-1-9OL	76	39.576	0	0.026	12.777	0.177	45.548	0.304	0	0	0.017	0.074	86.2384	5.8345	0.272247		1197.07	43
	Mountain Jourdanne	30I-TVG02-1	30I-TVG02-1	basaltic matrix glass	51.02	0.988	19.62	5.94776	0.108	5.58	11.09	3.78	0.2	0	0.118		30I-2-1-9OL	76	39.576	0	0.026	12.777	0.177	45.548	0.304	0	0	0.017	0.074	86.2384	9.36674	0.263173		1166.79	43	near equilibrium
	Mountain Jourdanne	30I-TVG02-1	30I-2-1-1MI	MI in Pl	51.6978	1.33682	16.7895	7.5205	0.10901	6.61494	10.8075	3.40298	0.23864	0.030385	0		30I-2-1-10OL	78	39.222	0.002	0.052	13.784	0.247	44.892	0.308	0	0	0.004	0.112	85.079	5.2798	0.270076		1181.53	43
	Mountain Jourdanne	30I-TVG02-1	30I-2-1-2MI	MI in Pl	51.0463	1.36411	16.7362	7.5084	0.163427	6.55861	10.5763	4.04288	0.249208	0.053738	0		30I-2-1-10OL	78	39.222	0.002	0.052	13.784	0.247	44.892	0.308	0	0	0.004	0.112	85.079	5.67344	0.268207		1187.15	43	near equilibrium
	Mountain Jourdanne	30I-TVG02-1	30I-2-1-2MI-2	MI in Pl	51.4126	1.19759	16.6681	7.47679	0.1368	6.53155	10.8338	3.99381	0.23896	0.06648	0		30I-2-1-10OL	78	39.222	0.002	0.052	13.784	0.247	44.892	0.308	0	0	0.004	0.112	85.079	4.51129	0.26823		1178.98	43	near equilibrium
	Mountain Jourdanne	30I-TVG02-1	30I-2-1-7	MI in Pl	50.8482	0.872332	16.6624	7.17047	0.12218	6.47554	10.5152	4.20337	0.278756	0.043148	0.137506		30I-2-1-10OL	78	39.222	0.002	0.052	13.784	0.247	44.892	0.308	0	0	0.004	0.112	85.079	4.45289	0.27729		1183.11	43
	Mountain Jourdanne	30I-TVG02-1	30I-2-1-8	MI in Pl	50.2375	0.930744	17.2069	6.85302	0.129652	6.98709	10.8184	3.99486	0.267688	0.050676	0.117566		30I-2-1-10OL	78	39.222	0.002	0.052	13.784	0.247	44.892	0.308	0	0	0.004	0.112	85.079	5.79203	0.313055		1204.33	43
	Mountain Jourdanne	30I-TVG02-1	30I-2-1-10	MI in Pl	50.4176	1.10968	16.7536	7.42733	0.17914	6.63535	10.3257	4.44544	0.277572	0.027318	0.162068		30I-2-1-10OL	78	39.222	0.002	0.052	13.784	0.247	44.892	0.308	0	0	0.004	0.112	85.079	5.27059	0.274307		1193.11	43
	Mountain Jourdanne	30I-TVG02-1	30I-2-1-10-2	MI in Pl	50.376	1.17787	16.8802	7.20103	0.194014	6.6803	9.98659	4.36287	0.310356	0.057412	0.203126		30I-2-1-10OL	78	39.222	0.002	0.052	13.784	0.247	44.892	0.308	0	0	0.004	0.112	85.079	6.10468	0.284844		1200.51	43
	Mountain Jourdanne	30I-TVG02-1	30I-2-1-20	MI in Pl	50.1997	1.19151	16.894	6.90974	0.147208	6.70602	10.292	4.37818	0.283696	0.08056	0.195624		30I-2-1-10OL	78	39.222	0.002	0.052	13.784	0.247	44.892	0.308	0	0	0.004	0.112	85.079	5.8345	0.297996		1199.91	43
	Mountain Jourdanne	30I-TVG02-1	30I-TVG02-1	basaltic matrix glass	51.02	0.988	19.62	5.94776	0.108	5.58	11.09	3.78	0.2	0	0.118		30I-2-1-10OL	78	39.222	0.002	0.052	13.784	0.247	44.892	0.308	0	0	0.004	0.112	85.079	9.36674	0.288063		1169.41	43
	Mountain Jourdanne	30I-TVG02-1	30I-2-1-5	MI in Pl	50.6398	0.85156	16.6732	7.3593	0.136328	6.50324	10.4483	4.30265	0.265672	0.029264	0.105008		30I-2-1-11-OL	81	39.175	0	0.04	13.275	0.187	44.967	0.308	0.006	0	0.068	0	85.6181	4.62113	0.260876		1184.1	43	near equilibrium
	Mountain Jourdanne	30I-TVG02-1	30I-2-1-7	MI in Pl	50.8482	0.872332	16.6624	7.17047	0.12218	6.47554	10.5152	4.20337	0.278756	0.043148	0.137506		30I-2-1-11-OL	81	39.175	0	0.04	13.275	0.187	44.967	0.308	0.006	0	0.068	0	85.6181	4.45289	0.266605		1181.81	43	near equilibrium
	Mountain Jourdanne	30I-TVG02-1	30I-2-1-8	MI in Pl	50.2375	0.930744	17.2069	6.85302	0.129652	6.98709	10.8184	3.99486	0.267688	0.050676	0.117566		30I-2-1-11-OL	81	39.175	0	0.04	13.275	0.187	44.967	0.308	0.006	0	0.068	0	85.6181	5.79203	0.300992		1203.01	43
	Mountain Jourdanne	30I-TVG02-1	30I-2-1-10	MI in Pl	50.4176	1.10968	16.7536	7.42733	0.17914	6.63535	10.3257	4.44544	0.277572	0.027318	0.162068		30I-2-1-11-OL	81	39.175	0	0.04	13.275	0.187	44.967	0.308	0.006	0	0.068	0	85.6181	5.27059	0.263737		1191.8	43	near equilibrium
	Mountain Jourdanne	30I-TVG02-1	30I-2-1-10-2	MI in Pl	50.376	1.17787	16.8802	7.20103	0.194014	6.6803	9.98659	4.36287	0.310356	0.057412	0.203126		30I-2-1-11-OL	81	39.175	0	0.04	13.275	0.187	44.967	0.308	0.006	0	0.068	0	85.6181	6.10468	0.273868		1199.19	43
	Mountain Jourdanne	30I-TVG02-1	30I-2-1-20	MI in Pl	50.1997	1.19151	16.894	6.90974	0.147208	6.70602	10.292	4.37818	0.283696	0.08056	0.195624		30I-2-1-11-OL	81	39.175	0	0.04	13.275	0.187	44.967	0.308	0.006	0	0.068	0	85.6181	5.8345	0.286513		1198.59	43
	Mountain Jourdanne	30I-TVG02-1	30I-TVG02-1	basaltic matrix glass	51.02	0.988	19.62	5.94776	0.108	5.58	11.09	3.78	0.2	0	0.118		30I-2-1-11-OL	81	39.175	0	0.04	13.275	0.187	44.967	0.308	0.006	0	0.068	0	85.6181	9.36674	0.276963		1168.19	43
	Mountain Jourdanne	30I-TVG02-1	30I-2-1-8	MI in Pl	50.2375	0.930744	17.2069	6.85302	0.129652	6.98709	10.8184	3.99486	0.267688	0.050676	0.117566		30I-2-1-12OL	84	39.52	0	0.043	12.919	0.233	45.561	0.316	0	0	0.102	0	86.0602	5.79203	0.289101		1201.75	43
	Mountain Jourdanne	30I-TVG02-1	30I-2-1-10-2	MI in Pl	50.376	1.17787	16.8802	7.20103	0.194014	6.6803	9.98659	4.36287	0.310356	0.057412	0.203126		30I-2-1-12OL	84	39.52	0	0.043	12.919	0.233	45.561	0.316	0	0	0.102	0	86.0602	6.10468	0.263049		1197.95	43	near equilibrium
	Mountain Jourdanne	30I-TVG02-1	30I-2-1-20	MI in Pl	50.1997	1.19151	16.894	6.90974	0.147208	6.70602	10.292	4.37818	0.283696	0.08056	0.195624		30I-2-1-12OL	84	39.52	0	0.043	12.919	0.233	45.561	0.316	0	0	0.102	0	86.0602	5.8345	0.275194		1197.35	43
	Mountain Jourdanne	30I-TVG02-1	30I-TVG02-1	basaltic matrix glass	51.02	0.988	19.62	5.94776	0.108	5.58	11.09	3.78	0.2	0	0.118		30I-2-1-12OL	84	39.52	0	0.043	12.919	0.233	45.561	0.316	0	0	0.102	0	86.0602	9.36674	0.266021		1167.04	43	near equilibrium
	Mountain Jourdanne	30I-TVG02-1	30I-2-1-8	MI in Pl	50.2375	0.930744	17.2069	6.85302	0.129652	6.98709	10.8184	3.99486	0.267688	0.050676	0.117566		30I-2-1-13OL	86	39.55	0.048	0.052	12.977	0.168	45.72	0.305	0	0	0.05	0.009	86.1091	5.79203	0.289389		1201.5	43
	Mountain Jourdanne	30I-TVG02-1	30I-2-1-10-2	MI in Pl	50.376	1.17787	16.8802	7.20103	0.194014	6.6803	9.98659	4.36287	0.310356	0.057412	0.203126		30I-2-1-13OL	86	39.55	0.048	0.052	12.977	0.168	45.72	0.305	0	0	0.05	0.009	86.1091	6.10468	0.263311		1197.7	43	near equilibrium
	Mountain Jourdanne	30I-TVG02-1	30I-2-1-20	MI in Pl	50.1997	1.19151	16.894	6.90974	0.147208	6.70602	10.292	4.37818	0.283696	0.08056	0.195624		30I-2-1-13OL	86	39.55	0.048	0.052	12.977	0.168	45.72	0.305	0	0	0.05	0.009	86.1091	5.8345	0.275468		1197.1	43
	Mountain Jourdanne	30I-TVG02-1	30I-TVG02-1	basaltic matrix glass	51.02	0.988	19.62	5.94776	0.108	5.58	11.09	3.78	0.2	0	0.118		30I-2-1-13OL	86	39.55	0.048	0.052	12.977	0.168	45.72	0.305	0	0	0.05	0.009	86.1091	9.36674	0.266286		1166.81	43	near equilibrium
	Mountain Jourdanne	30I-TVG02-1	30I-2-1-8	MI in Pl	50.2375	0.930744	17.2069	6.85302	0.129652	6.98709	10.8184	3.99486	0.267688	0.050676	0.117566		30I-2-1-14OL	90	39.393	0	0.039	12.674	0.224	45.65	0.29	0.004	0.012	0.025	0	86.3156	5.79203	0.283065		1200.79	43
	Mountain Jourdanne	30I-TVG02-1	30I-2-1-20	MI in Pl	50.1997	1.19151	16.894	6.90974	0.147208	6.70602	10.292	4.37818	0.283696	0.08056	0.195624		30I-2-1-14OL	90	39.393	0	0.039	12.674	0.224	45.65	0.29	0.004	0.012	0.025	0	86.3156	5.8345	0.269449		1196.39	43	near equilibrium
	Mountain Jourdanne	30I-TVG02-1	30I-TVG02-1	basaltic matrix glass	51.02	0.988	19.62	5.94776	0.108	5.58	11.09	3.78	0.2	0	0.118		30I-2-1-14OL	90	39.393	0	0.039	12.674	0.224	45.65	0.29	0.004	0.012	0.025	0	86.3156	9.36674	0.260468		1166.16	43	near equilibrium
	Mountain Jourdanne	30I-TVG02-1	30I-2-1-7	MI in Pl	50.8482	0.872332	16.6624	7.17047	0.12218	6.47554	10.5152	4.20337	0.278756	0.043148	0.137506		30I-2-1-15OL	92	39.43	0.02	0.046	12.897	0.19	45.396	0.289	0.017	0	0.037	0	86.0766	4.45289	0.256566		1180.72	43	near equilibrium
	Mountain Jourdanne	30I-TVG02-1	30I-2-1-8	MI in Pl	50.2375	0.930744	17.2069	6.85302	0.129652	6.98709	10.8184	3.99486	0.267688	0.050676	0.117566		30I-2-1-15OL	92	39.43	0.02	0.046	12.897	0.19	45.396	0.289	0.017	0	0.037	0	86.0766	5.79203	0.289658		1201.89	43
	Mountain Jourdanne	30I-TVG02-1	30I-2-1-10-2	MI in Pl	50.376	1.17787	16.8802	7.20103	0.194014	6.6803	9.98659	4.36287	0.310356	0.057412	0.203126		30I-2-1-15OL	92	39.43	0.02	0.046	12.897	0.19	45.396	0.289	0.017	0	0.037	0	86.0766	6.10468	0.263556		1198.08	43	near equilibrium
	Mountain Jourdanne	30I-TVG02-1	30I-2-1-20	MI in Pl	50.1997	1.19151	16.894	6.90974	0.147208	6.70602	10.292	4.37818	0.283696	0.08056	0.195624		30I-2-1-15OL	92	39.43	0.02	0.046	12.897	0.19	45.396	0.289	0.017	0	0.037	0	86.0766	5.8345	0.275724		1197.48	43
	Mountain Jourdanne	30I-TVG02-1	30I-TVG02-1	basaltic matrix glass	51.02	0.988	19.62	5.94776	0.108	5.58	11.09	3.78	0.2	0	0.118		30I-2-1-15OL	92	39.43	0.02	0.046	12.897	0.19	45.396	0.289	0.017	0	0.037	0	86.0766	9.36674	0.266534		1167.17	43	near equilibrium
	Mountain Jourdanne	30I-TVG02-1	30I-2-1-8	MI in Pl	50.2375	0.930744	17.2069	6.85302	0.129652	6.98709	10.8184	3.99486	0.267688	0.050676	0.117566		30I-2-1-18OL	98	39.187	0.035	0.044	13.006	0.19	45.284	0.324	0.001	0.002	0.029	0	85.9471	5.79203	0.292828		1201.87	43
	Mountain Jourdanne	30I-TVG02-1	30I-2-1-10-2	MI in Pl	50.376	1.17787	16.8802	7.20103	0.194014	6.6803	9.98659	4.36287	0.310356	0.057412	0.203126		30I-2-1-18OL	98	39.187	0.035	0.044	13.006	0.19	45.284	0.324	0.001	0.002	0.029	0	85.9471	6.10468	0.26644		1198.06	43	near equilibrium
	Mountain Jourdanne	30I-TVG02-1	30I-2-1-20	MI in Pl	50.1997	1.19151	16.894	6.90974	0.147208	6.70602	10.292	4.37818	0.283696	0.08056	0.195624		30I-2-1-18OL	98	39.187	0.035	0.044	13.006	0.19	45.284	0.324	0.001	0.002	0.029	0	85.9471	5.8345	0.278742		1197.46	43
	Mountain Jourdanne	30I-TVG02-1	30I-TVG02-1	basaltic matrix glass	51.02	0.988	19.62	5.94776	0.108	5.58	11.09	3.78	0.2	0	0.118		30I-2-1-18OL	98	39.187	0.035	0.044	13.006	0.19	45.284	0.324	0.001	0.002	0.029	0	85.9471	9.36674	0.269451		1167.15	43	near equilibrium
	Mountain Jourdanne	30I-TVG02-1	30I-2-1-8	MI in Pl	50.2375	0.930744	17.2069	6.85302	0.129652	6.98709	10.8184	3.99486	0.267688	0.050676	0.117566		30I-2-1-19OL	101	39.594	0.014	0.04	12.918	0.212	45.895	0.283	0	0	0.054	0.017	86.1678	5.79203	0.286975		1201.02	43
	Mountain Jourdanne	30I-TVG02-1	30I-2-1-10-2	MI in Pl	50.376	1.17787	16.8802	7.20103	0.194014	6.6803	9.98659	4.36287	0.310356	0.057412	0.203126		30I-2-1-19OL	101	39.594	0.014	0.04	12.918	0.212	45.895	0.283	0	0	0.054	0.017	86.1678	6.10468	0.261115		1197.22	43	near equilibrium
	Mountain Jourdanne	30I-TVG02-1	30I-2-1-20	MI in Pl	50.1997	1.19151	16.894	6.90974	0.147208	6.70602	10.292	4.37818	0.283696	0.08056	0.195624		30I-2-1-19OL	101	39.594	0.014	0.04	12.918	0.212	45.895	0.283	0	0	0.054	0.017	86.1678	5.8345	0.27317		1196.62	43
	Mountain Jourdanne	30I-TVG02-1	30I-TVG02-1	basaltic matrix glass	51.02	0.988	19.62	5.94776	0.108	5.58	11.09	3.78	0.2	0	0.118		30I-2-1-19OL	101	39.594	0.014	0.04	12.918	0.212	45.895	0.283	0	0	0.054	0.017	86.1678	9.36674	0.264065		1166.37	43	near equilibrium
	Mountain Jourdanne	30I-TVG02-1	30I-2-1-8	MI in Pl	50.2375	0.930744	17.2069	6.85302	0.129652	6.98709	10.8184	3.99486	0.267688	0.050676	0.117566		30I-2-1-20OL	103	39.429	0	0.026	12.706	0.252	45.52	0.245	0.005	0.007	0.055	0.056	86.2266	5.79203	0.284591		1201.14	43
	Mountain Jourdanne	30I-TVG02-1	30I-2-1-20	MI in Pl	50.1997	1.19151	16.894	6.90974	0.147208	6.70602	10.292	4.37818	0.283696	0.08056	0.195624		30I-2-1-20OL	103	39.429	0	0.026	12.706	0.252	45.52	0.245	0.005	0.007	0.055	0.056	86.2266	5.8345	0.270901		1196.74	43
	Mountain Jourdanne	30I-TVG02-1	30I-TVG02-1	basaltic matrix glass	51.02	0.988	19.62	5.94776	0.108	5.58	11.09	3.78	0.2	0	0.118		30I-2-1-20OL	103	39.429	0	0.026	12.706	0.252	45.52	0.245	0.005	0.007	0.055	0.056	86.2266	9.36674	0.261871		1166.48	43	near equilibrium
	Mountain Jourdanne	30I-TVG02-1	30I-2-1-8	MI in Pl	50.2375	0.930744	17.2069	6.85302	0.129652	6.98709	10.8184	3.99486	0.267688	0.050676	0.117566		30I-2-1-22OL	107	39.049	0.018	0.023	13.048	0.229	45.731	0.337	0	0.023	0.009	0.026	85.9913	5.79203	0.290902		1200.65	43
	Mountain Jourdanne	30I-TVG02-1	30I-2-1-10-2	MI in Pl	50.376	1.17787	16.8802	7.20103	0.194014	6.6803	9.98659	4.36287	0.310356	0.057412	0.203126		30I-2-1-22OL	107	39.049	0.018	0.023	13.048	0.229	45.731	0.337	0	0.023	0.009	0.026	85.9913	6.10468	0.264688		1196.86	43	near equilibrium
	Mountain Jourdanne	30I-TVG02-1	30I-2-1-20	MI in Pl	50.1997	1.19151	16.894	6.90974	0.147208	6.70602	10.292	4.37818	0.283696	0.08056	0.195624		30I-2-1-22OL	107	39.049	0.018	0.023	13.048	0.229	45.731	0.337	0	0.023	0.009	0.026	85.9913	5.8345	0.276909		1196.26	43
	Mountain Jourdanne	30I-TVG02-1	30I-TVG02-1	basaltic matrix glass	51.02	0.988	19.62	5.94776	0.108	5.58	11.09	3.78	0.2	0	0.118		30I-2-1-22OL	107	39.049	0.018	0.023	13.048	0.229	45.731	0.337	0	0.023	0.009	0.026	85.9913	9.36674	0.267679		1166.03	43	near equilibrium
	Mountain Jourdanne	30I-TVG02-1	30I-2-1-8	MI in Pl	50.2375	0.930744	17.2069	6.85302	0.129652	6.98709	10.8184	3.99486	0.267688	0.050676	0.117566		30I-2-1-23OL	109	39.433	0.007	0.038	12.953	0.229	45.37	0.295	0.01	0	0.016	0.009	85.9823	5.79203	0.291082		1202.07	43
	Mountain Jourdanne	30I-TVG02-1	30I-2-1-10-2	MI in Pl	50.376	1.17787	16.8802	7.20103	0.194014	6.6803	9.98659	4.36287	0.310356	0.057412	0.203126		30I-2-1-23OL	109	39.433	0.007	0.038	12.953	0.229	45.37	0.295	0.01	0	0.016	0.009	85.9823	6.10468	0.264852		1198.26	43	near equilibrium
	Mountain Jourdanne	30I-TVG02-1	30I-2-1-20	MI in Pl	50.1997	1.19151	16.894	6.90974	0.147208	6.70602	10.292	4.37818	0.283696	0.08056	0.195624		30I-2-1-23OL	109	39.433	0.007	0.038	12.953	0.229	45.37	0.295	0.01	0	0.016	0.009	85.9823	5.8345	0.27708		1197.66	43
	Mountain Jourdanne	30I-TVG02-1	30I-TVG02-1	basaltic matrix glass	51.02	0.988	19.62	5.94776	0.108	5.58	11.09	3.78	0.2	0	0.118		30I-2-1-23OL	109	39.433	0.007	0.038	12.953	0.229	45.37	0.295	0.01	0	0.016	0.009	85.9823	9.36674	0.267844		1167.33	43	near equilibrium
	Mountain Jourdanne	30I-TVG02-1	30I-2-1-8	MI in Pl	50.2375	0.930744	17.2069	6.85302	0.129652	6.98709	10.8184	3.99486	0.267688	0.050676	0.117566		30I-2-1-24OL	111	39.519	0.037	0.036	12.925	0.238	45.406	0.298	0.001	0.011	0.06	0.022	86.0091	5.79203	0.290223		1202.18	43
	Mountain Jourdanne	30I-TVG02-1	30I-2-1-10-2	MI in Pl	50.376	1.17787	16.8802	7.20103	0.194014	6.6803	9.98659	4.36287	0.310356	0.057412	0.203126		30I-2-1-24OL	111	39.519	0.037	0.036	12.925	0.238	45.406	0.298	0.001	0.011	0.06	0.022	86.0091	6.10468	0.26407		1198.37	43	near equilibrium
	Mountain Jourdanne	30I-TVG02-1	30I-2-1-20	MI in Pl	50.1997	1.19151	16.894	6.90974	0.147208	6.70602	10.292	4.37818	0.283696	0.08056	0.195624		30I-2-1-24OL	111	39.519	0.037	0.036	12.925	0.238	45.406	0.298	0.001	0.011	0.06	0.022	86.0091	5.8345	0.276262		1197.77	43
	Mountain Jourdanne	30I-TVG02-1	30I-TVG02-1	basaltic matrix glass	51.02	0.988	19.62	5.94776	0.108	5.58	11.09	3.78	0.2	0	0.118		30I-2-1-24OL	111	39.519	0.037	0.036	12.925	0.238	45.406	0.298	0.001	0.011	0.06	0.022	86.0091	9.36674	0.267053		1167.43	43	near equilibrium
