# Supplementary material for: Magmatic processes within the plumbing system of the ultraslow-spreading southwest Indian ridge: constraints from olivine, plagioclase and melt inclusions
Source: Springer Nature journal article supplement (doi:10.1007/s00410-024-02098-0), 2024-02-22
Supplement: MOESM12 [file 410_2024_2098_MOESM12_ESM.xls]

## Sheet: PlotDat1
Source sheet	Table S12	1100	2.35624e-05	1205	0	1100	0
Plot name	ProbDens1	1100.88	2.55257e-05	1212.5	0	1399.12	0
Plot Type	16	1101.76	2.76364e-05	1212.5	1
1st free col	9	1102.65	2.99041e-05	1205	1
Sigma Level	1	1103.53	3.23389e-05	1205	0
Absolute Errs	TRUE	1104.41	3.49514e-05	ErrBox	ErrBox
Symbol Type	1	1105.29	3.77528e-05	1212.5	0
Inverse Plot	FALSE	1106.18	4.07549e-05	1220	0
Color Plot	TRUE	1107.06	4.39699e-05	1220	7
3D plot	FALSE	1107.94	4.74107e-05	1212.5	7
Linear	FALSE	1108.82	5.10907e-05	1212.5	0
Data Range	AL4:AM33	1109.71	5.50242e-05	ErrBox	ErrBox
Filled Symbols	TRUE	1110.59	5.92257e-05	1220	0
ConcAge	FALSE	1111.47	6.37107e-05	1227.5	0
ConcSwap	FALSE	1112.35	6.84952e-05	1227.5	5
1st Symbol-row	1	1113.24	7.35957e-05	1220	5
		1114.12	7.90298e-05	1220	0
		1115	8.48154e-05	ErrBox	ErrBox
		1115.88	9.09711e-05	1227.5	0
		1116.76	9.75165e-05	1235	0
		1117.65	0.000104472	1235	3
		1118.53	0.000111857	1227.5	3
		1119.41	0.000119694	1227.5	0
		1120.29	0.000128006	ErrBox	ErrBox
		1121.18	0.000136814	1280	0
		1122.06	0.000146143	1287.5	0
		1122.94	0.000156017	1287.5	14
		1123.82	0.00016646	1280	14
		1124.71	0.000177498	1280	0
		1125.59	0.000189157	ErrBox	ErrBox
		1126.47	0.000201676
		1127.35	0.000214789
		1128.24	0.000228547
		1129.12	0.000243111
		1130	0.000258349
		1130.88	0.000274415
		1131.76	0.000291278
		1132.65	0.000308998
		1133.53	0.000327605
		1134.41	0.000347131
		1135.29	0.000367608
		1136.18	0.000389068
		1137.06	0.000411541
		1137.94	0.000435061
		1138.82	0.000459659
		1139.71	0.000485367
		1140.59	0.000512217
		1141.47	0.00054024
		1142.35	0.000569467
		1143.24	0.000599929
		1144.12	0.000631657
		1145	0.000664679
		1145.88	0.000699026
		1146.76	0.000734724
		1147.65	0.000771802
		1148.53	0.000810285
		1149.41	0.0008502
		1150.29	0.000891569
		1151.18	0.000934416
		1152.06	0.000978762
		1152.94	0.00102463
		1153.82	0.00107203
		1154.71	0.00112098
		1155.59	0.00117151
		1156.47	0.00122361
		1157.35	0.00127731
		1158.24	0.0013326
		1159.12	0.0013895
		1160	0.00144801
		1160.88	0.00150814
		1161.76	0.00156987
		1162.65	0.00163321
		1163.53	0.00169814
		1164.41	0.00176467
		1165.29	0.00183278
		1166.18	0.00190245
		1167.06	0.00197367
		1167.94	0.00204641
		1168.82	0.00212065
		1169.71	0.00219637
		1170.59	0.00227353
		1171.47	0.0023521
		1172.35	0.00243205
		1173.24	0.00251333
		1174.12	0.0025959
		1175	0.00267973
		1175.88	0.00276475
		1176.76	0.00285091
		1177.65	0.00293817
		1178.53	0.00302647
		1179.41	0.00311574
		1180.29	0.00320592
		1181.18	0.00329696
		1182.06	0.00338877
		1182.94	0.00348129
		1183.82	0.00357444
		1184.71	0.00366816
		1185.59	0.00376237
		1186.47	0.00385698
		1187.35	0.00395192
		1188.24	0.00404711
		1189.12	0.00414246
		1190	0.00423789
		1190.88	0.00433332
		1191.76	0.00442867
		1192.65	0.00452383
		1193.53	0.00461874
		1194.41	0.0047133
		1195.29	0.00480743
		1196.18	0.00490104
		1197.06	0.00499405
		1197.94	0.00508637
		1198.82	0.00517793
		1199.71	0.00526863
		1200.59	0.00535841
		1201.47	0.00544717
		1202.35	0.00553485
		1203.24	0.00562137
		1204.12	0.00570666
		1205	0.00579064
		1205.88	0.00587326
		1206.76	0.00595444
		1207.65	0.00603412
		1208.53	0.00611225
		1209.41	0.00618876
		1210.29	0.00626362
		1211.18	0.00633676
		1212.06	0.00640815
		1212.94	0.00647773
		1213.82	0.00654548
		1214.71	0.00661136
		1215.59	0.00667534
		1216.47	0.00673738
		1217.35	0.00679747
		1218.24	0.00685559
		1219.12	0.00691172
		1220	0.00696585
		1220.88	0.00701797
		1221.76	0.00706807
		1222.65	0.00711615
		1223.53	0.00716222
		1224.41	0.00720627
		1225.29	0.00724831
		1226.18	0.00728837
		1227.06	0.00732643
		1227.94	0.00736254
		1228.82	0.00739669
		1229.71	0.00742891
		1230.59	0.00745923
		1231.47	0.00748766
		1232.35	0.00751423
		1233.24	0.00753898
		1234.12	0.00756192
		1235	0.00758309
		1235.88	0.00760251
		1236.76	0.00762022
		1237.65	0.00763625
		1238.53	0.00765063
		1239.41	0.00766339
		1240.29	0.00767455
		1241.18	0.00768415
		1242.06	0.00769223
		1242.94	0.0076988
		1243.82	0.00770389
		1244.71	0.00770754
		1245.59	0.00770976
		1246.47	0.00771058
		1247.35	0.00771002
		1248.24	0.0077081
		1249.12	0.00770484
		1250	0.00770026
		1250.88	0.00769437
		1251.76	0.00768717
		1252.65	0.00767869
		1253.53	0.00766893
		1254.41	0.0076579
		1255.29	0.0076456
		1256.18	0.00763203
		1257.06	0.00761718
		1257.94	0.00760107
		1258.82	0.00758369
		1259.71	0.00756502
		1260.59	0.00754506
		1261.47	0.00752381
		1262.35	0.00750124
		1263.24	0.00747735
		1264.12	0.00745213
		1265	0.00742556
		1265.88	0.00739762
		1266.76	0.0073683
		1267.65	0.00733757
		1268.53	0.00730543
		1269.41	0.00727186
		1270.29	0.00723683
		1271.18	0.00720034
		1272.06	0.00716235
		1272.94	0.00712286
		1273.82	0.00708185
		1274.71	0.00703931
		1275.59	0.00699522
		1276.47	0.00694957
		1277.35	0.00690235
		1278.24	0.00685355
		1279.12	0.00680316
		1280	0.00675117
		1280.88	0.0066976
		1281.76	0.00664242
		1282.65	0.00658566
		1283.53	0.0065273
		1284.41	0.00646736
		1285.29	0.00640585
		1286.18	0.00634278
		1287.06	0.00627816
		1287.94	0.00621202
		1288.82	0.00614438
		1289.71	0.00607525
		1290.59	0.00600468
		1291.47	0.00593269
		1292.35	0.00585932
		1293.24	0.00578459
		1294.12	0.00570856
		1295	0.00563127
		1295.88	0.00555276
		1296.76	0.00547308
		1297.65	0.00539228
		1298.53	0.00531042
		1299.41	0.00522755
		1300.29	0.00514374
		1301.18	0.00505904
		1302.06	0.00497352
		1302.94	0.00488723
		1303.82	0.00480026
		1304.71	0.00471267
		1305.59	0.00462452
		1306.47	0.0045359
		1307.35	0.00444686
		1308.24	0.00435749
		1309.12	0.00426786
		1310	0.00417804
		1310.88	0.0040881
		1311.76	0.00399813
		1312.65	0.00390819
		1313.53	0.00381836
		1314.41	0.00372871
		1315.29	0.00363932
		1316.18	0.00355026
		1317.06	0.0034616
		1317.94	0.0033734
		1318.82	0.00328574
		1319.71	0.00319869
		1320.59	0.0031123
		1321.47	0.00302665
		1322.35	0.00294179
		1323.24	0.00285778
		1324.12	0.00277469
		1325	0.00269256
		1325.88	0.00261145
		1326.76	0.00253141
		1327.65	0.00245249
		1328.53	0.00237472
		1329.41	0.00229816
		1330.29	0.00222285
		1331.18	0.00214881
		1332.06	0.00207609
		1332.94	0.00200471
		1333.82	0.00193471
		1334.71	0.00186611
		1335.59	0.00179894
		1336.47	0.0017332
		1337.35	0.00166893
		1338.24	0.00160613
		1339.12	0.00154482
		1340	0.00148501
		1340.88	0.0014267
		1341.76	0.0013699
		1342.65	0.00131461
		1343.53	0.00126083
		1344.41	0.00120856
		1345.29	0.00115779
		1346.18	0.00110851
		1347.06	0.00106072
		1347.94	0.00101441
		1348.82	0.000969552
		1349.71	0.000926146
		1350.59	0.00088417
		1351.47	0.000843607
		1352.35	0.000804438
		1353.24	0.000766641
		1354.12	0.000730194
		1355	0.000695075
		1355.88	0.000661259
		1356.76	0.00062872
		1357.65	0.000597433
		1358.53	0.000567371
		1359.41	0.000538505
		1360.29	0.000510809
		1361.18	0.000484252
		1362.06	0.000458807
		1362.94	0.000434443
		1363.82	0.000411131
		1364.71	0.000388841
		1365.59	0.000367509
		1366.47	0.000347176
		1367.35	0.000327774
		1368.24	0.000309274
		1369.12	0.000291615
		1370	0.000274798
		1370.88	0.000258831
		1371.76	0.000243615
		1372.65	0.000229189
		1373.53	0.000215457
		1374.41	0.00020246
		1375.29	0.000190041
		1376.18	0.000178335
		1377.06	0.000167284
		1377.94	0.000156761
		1378.82	0.000146874
		1379.71	0.000137528
		1380.59	0.0001287
		1381.47	0.000120366
		1382.35	0.000112475
		1383.24	0.000105003
		1384.12	9.80316e-05
		1385	9.14361e-05
		1385.88	8.52644e-05
		1386.76	7.94616e-05
		1387.65	7.40094e-05
		1388.53	6.88901e-05
		1389.41	6.4054e-05
		1390.29	5.95529e-05
		1391.18	5.53349e-05
		1392.06	5.13848e-05
		1392.94	4.76881e-05
		1393.82	4.42309e-05
		1394.71	4.09996e-05
		1395.59	3.79817e-05
		1396.47	3.51648e-05
		1397.35	3.25373e-05
		1398.24	3.00881e-05
		1399.12	2.78066e-05
		IsoLine	IsoLine

## Sheet: PlotDat2
Source sheet	Table S12	1100	5.77005e-05	1208	0	1100	0
Plot name	ProbDens2	1100.71	6.14475e-05	1214	0	1339.29	0
Plot Type	16	1101.41	6.5413e-05	1214	1
1st free col	9	1102.12	6.96079e-05	1208	1
Sigma Level	1	1102.82	7.40438e-05	1208	0
Absolute Errs	TRUE	1103.53	7.87325e-05	ErrBox	ErrBox
Symbol Type	1	1104.24	8.36862e-05	1220	0
Inverse Plot	FALSE	1104.94	8.8918e-05	1226	0
Color Plot	TRUE	1105.65	9.44409e-05	1226	1
3D plot	FALSE	1106.35	0.000100269	1220	1
Linear	FALSE	1107.06	0.000106416	1220	0
Data Range	AL4:AM5	1107.76	0.000112897	ErrBox	ErrBox
Filled Symbols	TRUE	1108.47	0.000119728
ConcAge	FALSE	1109.18	0.000126923
ConcSwap	FALSE	1109.88	0.0001345
1st Symbol-row	1	1110.59	0.000142475
		1111.29	0.000150866
		1112	0.000159691
		1112.71	0.000168967
		1113.41	0.000178715
		1114.12	0.000188953
		1114.82	0.000199701
		1115.53	0.000210982
		1116.24	0.000222815
		1116.94	0.000235222
		1117.65	0.000248226
		1118.35	0.000261849
		1119.06	0.000276116
		1119.76	0.000291049
		1120.47	0.000306673
		1121.18	0.000323014
		1121.88	0.000340097
		1122.59	0.000357947
		1123.29	0.000376591
		1124	0.000396056
		1124.71	0.000416368
		1125.41	0.000437557
		1126.12	0.00045965
		1126.82	0.000482675
		1127.53	0.000506661
		1128.24	0.000531638
		1128.94	0.000557634
		1129.65	0.00058468
		1130.35	0.000612805
		1131.06	0.00064204
		1131.76	0.000672414
		1132.47	0.000703958
		1133.18	0.000736702
		1133.88	0.000770677
		1134.59	0.000805914
		1135.29	0.000842442
		1136	0.000880291
		1136.71	0.000919493
		1137.41	0.000960076
		1138.12	0.00100207
		1138.82	0.00104551
		1139.53	0.00109041
		1140.24	0.00113681
		1140.94	0.00118474
		1141.65	0.00123422
		1142.35	0.00128527
		1143.06	0.00133794
		1143.76	0.00139223
		1144.47	0.00144818
		1145.18	0.0015058
		1145.88	0.00156513
		1146.59	0.00162617
		1147.29	0.00168896
		1148	0.0017535
		1148.71	0.00181982
		1149.41	0.00188794
		1150.12	0.00195786
		1150.82	0.0020296
		1151.53	0.00210317
		1152.24	0.00217858
		1152.94	0.00225585
		1153.65	0.00233496
		1154.35	0.00241594
		1155.06	0.00249878
		1155.76	0.00258348
		1156.47	0.00267003
		1157.18	0.00275844
		1157.88	0.0028487
		1158.59	0.0029408
		1159.29	0.00303472
		1160	0.00313046
		1160.71	0.003228
		1161.41	0.00332731
		1162.12	0.00342838
		1162.82	0.00353118
		1163.53	0.00363568
		1164.24	0.00374186
		1164.94	0.00384968
		1165.65	0.00395911
		1166.35	0.0040701
		1167.06	0.00418262
		1167.76	0.00429663
		1168.47	0.00441207
		1169.18	0.00452889
		1169.88	0.00464705
		1170.59	0.00476648
		1171.29	0.00488713
		1172	0.00500894
		1172.71	0.00513183
		1173.41	0.00525575
		1174.12	0.00538063
		1174.82	0.00550638
		1175.53	0.00563294
		1176.24	0.00576022
		1176.94	0.00588815
		1177.65	0.00601664
		1178.35	0.00614561
		1179.06	0.00627496
		1179.76	0.00640461
		1180.47	0.00653446
		1181.18	0.00666441
		1181.88	0.00679438
		1182.59	0.00692426
		1183.29	0.00705395
		1184	0.00718334
		1184.71	0.00731234
		1185.41	0.00744084
		1186.12	0.00756872
		1186.82	0.00769589
		1187.53	0.00782223
		1188.24	0.00794764
		1188.94	0.00807199
		1189.65	0.00819519
		1190.35	0.00831711
		1191.06	0.00843766
		1191.76	0.0085567
		1192.47	0.00867414
		1193.18	0.00878987
		1193.88	0.00890376
		1194.59	0.00901571
		1195.29	0.00912561
		1196	0.00923336
		1196.71	0.00933884
		1197.41	0.00944194
		1198.12	0.00954257
		1198.82	0.00964062
		1199.53	0.00973599
		1200.24	0.00982858
		1200.94	0.00991829
		1201.65	0.010005
		1202.35	0.0100887
		1203.06	0.0101692
		1203.76	0.0102465
		1204.47	0.0103205
		1205.18	0.010391
		1205.88	0.0104581
		1206.59	0.0105216
		1207.29	0.0105815
		1208	0.0106378
		1208.71	0.0106902
		1209.41	0.0107389
		1210.12	0.0107837
		1210.82	0.0108245
		1211.53	0.0108615
		1212.24	0.0108944
		1212.94	0.0109232
		1213.65	0.010948
		1214.35	0.0109688
		1215.06	0.0109853
		1215.76	0.0109978
		1216.47	0.0110061
		1217.18	0.0110102
		1217.88	0.0110101
		1218.59	0.0110059
		1219.29	0.0109975
		1220	0.010985
		1220.71	0.0109683
		1221.41	0.0109475
		1222.12	0.0109226
		1222.82	0.0108937
		1223.53	0.0108607
		1224.24	0.0108237
		1224.94	0.0107827
		1225.65	0.0107378
		1226.35	0.0106891
		1227.06	0.0106365
		1227.76	0.0105802
		1228.47	0.0105202
		1229.18	0.0104566
		1229.88	0.0103895
		1230.59	0.0103188
		1231.29	0.0102448
		1232	0.0101674
		1232.71	0.0100868
		1233.41	0.0100031
		1234.12	0.0099163
		1234.82	0.00982652
		1235.53	0.00973387
		1236.24	0.00963844
		1236.94	0.00954033
		1237.65	0.00943964
		1238.35	0.00933648
		1239.06	0.00923095
		1239.76	0.00912316
		1240.47	0.0090132
		1241.18	0.00890121
		1241.88	0.00878727
		1242.59	0.00867151
		1243.29	0.00855403
		1244	0.00843495
		1244.71	0.00831437
		1245.41	0.00819242
		1246.12	0.0080692
		1246.82	0.00794481
		1247.53	0.00781939
		1248.24	0.00769303
		1248.94	0.00756584
		1249.65	0.00743794
		1250.35	0.00730943
		1251.06	0.00718043
		1251.76	0.00705102
		1252.47	0.00692133
		1253.18	0.00679145
		1253.88	0.00666148
		1254.59	0.00653152
		1255.29	0.00640168
		1256	0.00627203
		1256.71	0.00614269
		1257.41	0.00601373
		1258.12	0.00588526
		1258.82	0.00575734
		1259.53	0.00563007
		1260.24	0.00550353
		1260.94	0.0053778
		1261.65	0.00525294
		1262.35	0.00512904
		1263.06	0.00500617
		1263.76	0.00488439
		1264.47	0.00476377
		1265.18	0.00464436
		1265.88	0.00452624
		1266.59	0.00440944
		1267.29	0.00429404
		1268	0.00418007
		1268.71	0.00406758
		1269.41	0.00395662
		1270.12	0.00384723
		1270.82	0.00373944
		1271.53	0.0036333
		1272.24	0.00352884
		1272.94	0.00342608
		1273.65	0.00332505
		1274.35	0.00322577
		1275.06	0.00312828
		1275.76	0.00303258
		1276.47	0.0029387
		1277.18	0.00284664
		1277.88	0.00275643
		1278.59	0.00266806
		1279.29	0.00258154
		1280	0.00249689
		1280.71	0.00241409
		1281.41	0.00233316
		1282.12	0.00225408
		1282.82	0.00217686
		1283.53	0.00210149
		1284.24	0.00202796
		1284.94	0.00195626
		1285.65	0.00188638
		1286.35	0.0018183
		1287.06	0.00175202
		1287.76	0.00168752
		1288.47	0.00162477
		1289.18	0.00156377
		1289.88	0.00150448
		1290.59	0.0014469
		1291.29	0.00139099
		1292	0.00133673
		1292.71	0.0012841
		1293.41	0.00123308
		1294.12	0.00118364
		1294.82	0.00113575
		1295.53	0.00108938
		1296.24	0.00104451
		1296.94	0.00100111
		1297.65	0.000959144
		1298.35	0.000918592
		1299.06	0.000879422
		1299.76	0.000841602
		1300.47	0.000805104
		1301.18	0.000769896
		1301.88	0.000735949
		1302.59	0.000703232
		1303.29	0.000671715
		1304	0.000641367
		1304.71	0.000612158
		1305.41	0.000584058
		1306.12	0.000557036
		1306.82	0.000531063
		1307.53	0.000506109
		1308.24	0.000482145
		1308.94	0.000459141
		1309.65	0.000437069
		1310.35	0.0004159
		1311.06	0.000395607
		1311.76	0.000376161
		1312.47	0.000357535
		1313.18	0.000339702
		1313.88	0.000322637
		1314.59	0.000306313
		1315.29	0.000290704
		1316	0.000275786
		1316.71	0.000261534
		1317.41	0.000247925
		1318.12	0.000234935
		1318.82	0.000222541
		1319.53	0.000210721
		1320.24	0.000199453
		1320.94	0.000188716
		1321.65	0.000178489
		1322.35	0.000168752
		1323.06	0.000159486
		1323.76	0.000150672
		1324.47	0.000142291
		1325.18	0.000134325
		1325.88	0.000126757
		1326.59	0.000119569
		1327.29	0.000112747
		1328	0.000106274
		1328.71	0.000100134
		1329.41	9.43129e-05
		1330.12	8.87966e-05
		1330.82	8.35713e-05
		1331.53	7.86237e-05
		1332.24	7.39409e-05
		1332.94	6.95106e-05
		1333.65	6.53209e-05
		1334.35	6.13605e-05
		1335.06	5.76184e-05
		1335.76	5.40839e-05
		1336.47	5.07469e-05
		1337.18	4.75978e-05
		1337.88	4.46272e-05
		1338.59	4.18261e-05
		1339.29	3.91859e-05
		IsoLine	IsoLine

## Sheet: PlotDat3
Source sheet	Table S12	1100	2.11257e-05	1205	0	1100	0
Plot name	ProbDens3	1100.88	2.28924e-05	1212.5	0	1399.12	0
Plot Type	16	1101.76	2.47924e-05	1212.5	1
1st free col	9	1102.65	2.68344e-05	1205	1
Sigma Level	1	1103.53	2.90275e-05	1205	0
Absolute Errs	TRUE	1104.41	3.13814e-05	ErrBox	ErrBox
Symbol Type	1	1105.29	3.39064e-05	1212.5	0
Inverse Plot	FALSE	1106.18	3.66131e-05	1220	0
Color Plot	TRUE	1107.06	3.95127e-05	1220	6
3D plot	FALSE	1107.94	4.2617e-05	1212.5	6
Linear	FALSE	1108.82	4.59382e-05	1212.5	0
Data Range	AL6:AM33	1109.71	4.94893e-05	ErrBox	ErrBox
Filled Symbols	TRUE	1110.59	5.32837e-05	1220	0
ConcAge	FALSE	1111.47	5.73354e-05	1227.5	0
ConcSwap	FALSE	1112.35	6.1659e-05	1227.5	4
1st Symbol-row	1	1113.24	6.62699e-05	1220	4
		1114.12	7.11839e-05	1220	0
		1115	7.64176e-05	ErrBox	ErrBox
		1115.88	8.1988e-05	1227.5	0
		1116.76	8.7913e-05	1235	0
		1117.65	9.42109e-05	1235	3
		1118.53	0.000100901	1227.5	3
		1119.41	0.000108003	1227.5	0
		1120.29	0.000115537	ErrBox	ErrBox
		1121.18	0.000123524	1280	0
		1122.06	0.000131987	1287.5	0
		1122.94	0.000140946	1287.5	14
		1123.82	0.000150426	1280	14
		1124.71	0.000160449	1280	0
		1125.59	0.00017104	ErrBox	ErrBox
		1126.47	0.00018245
		1127.35	0.000194391
		1128.24	0.000206914
		1129.12	0.000220186
		1130	0.000234063
		1130.88	0.000248706
		1131.76	0.000264075
		1132.65	0.000280231
		1133.53	0.000297204
		1134.41	0.000315023
		1135.29	0.000333717
		1136.18	0.000353317
		1137.06	0.000373851
		1137.94	0.00039535
		1138.82	0.000417845
		1139.71	0.000441365
		1140.59	0.000465941
		1141.47	0.000491601
		1142.35	0.000518377
		1143.24	0.000546297
		1144.12	0.00057539
		1145	0.000605685
		1145.88	0.000637209
		1146.76	0.00066999
		1147.65	0.000704054
		1148.53	0.000739427
		1149.41	0.000776133
		1150.29	0.000814197
		1151.18	0.000853641
		1152.06	0.000894486
		1152.94	0.000936752
		1153.82	0.000980458
		1154.71	0.00102562
		1155.59	0.00107226
		1156.47	0.00112038
		1157.35	0.00117
		1158.24	0.00122112
		1159.12	0.00127377
		1160	0.00132793
		1160.88	0.00138363
		1161.76	0.00144084
		1162.65	0.00149959
		1163.53	0.00155986
		1164.41	0.00162164
		1165.29	0.00168494
		1166.18	0.00174973
		1167.06	0.00181601
		1167.94	0.00188376
		1168.82	0.00195295
		1169.71	0.00202358
		1170.59	0.00209561
		1171.47	0.00216901
		1172.35	0.00224376
		1173.24	0.00231982
		1174.12	0.00239716
		1175	0.00247573
		1175.88	0.00255551
		1176.76	0.00263643
		1177.65	0.00271847
		1178.53	0.00280155
		1179.41	0.00288565
		1180.29	0.00297069
		1181.18	0.00305662
		1182.06	0.00314339
		1182.94	0.00323094
		1183.82	0.00331919
		1184.71	0.00340808
		1185.59	0.00349756
		1186.47	0.00358754
		1187.35	0.00367796
		1188.24	0.00376874
		1189.12	0.00385982
		1190	0.00395111
		1190.88	0.00404255
		1191.76	0.00413406
		1192.65	0.00422556
		1193.53	0.00431698
		1194.41	0.00440824
		1195.29	0.00449926
		1196.18	0.00458997
		1197.06	0.00468028
		1197.94	0.00477014
		1198.82	0.00485945
		1199.71	0.00494815
		1200.59	0.00503617
		1201.47	0.00512344
		1202.35	0.00520988
		1203.24	0.00529543
		1204.12	0.00538002
		1205	0.00546359
		1205.88	0.00554608
		1206.76	0.00562743
		1207.65	0.00570758
		1208.53	0.00578648
		1209.41	0.00586408
		1210.29	0.00594032
		1211.18	0.00601517
		1212.06	0.00608859
		1212.94	0.00616052
		1213.82	0.00623094
		1214.71	0.00629981
		1215.59	0.00636711
		1216.47	0.0064328
		1217.35	0.00649686
		1218.24	0.00655928
		1219.12	0.00662002
		1220	0.00667909
		1220.88	0.00673646
		1221.76	0.00679214
		1222.65	0.0068461
		1223.53	0.00689836
		1224.41	0.0069489
		1225.29	0.00699774
		1226.18	0.00704487
		1227.06	0.00709031
		1227.94	0.00713405
		1228.82	0.00717612
		1229.71	0.00721652
		1230.59	0.00725527
		1231.47	0.00729238
		1232.35	0.00732786
		1233.24	0.00736174
		1234.12	0.00739404
		1235	0.00742476
		1235.88	0.00745394
		1236.76	0.00748158
		1237.65	0.00750771
		1238.53	0.00753235
		1239.41	0.00755551
		1240.29	0.00757721
		1241.18	0.00759747
		1242.06	0.00761631
		1242.94	0.00763374
		1243.82	0.00764977
		1244.71	0.00766442
		1245.59	0.0076777
		1246.47	0.00768962
		1247.35	0.00770018
		1248.24	0.00770939
		1249.12	0.00771726
		1250	0.00772378
		1250.88	0.00772897
		1251.76	0.0077328
		1252.65	0.0077353
		1253.53	0.00773643
		1254.41	0.00773621
		1255.29	0.00773462
		1256.18	0.00773164
		1257.06	0.00772727
		1257.94	0.00772149
		1258.82	0.00771429
		1259.71	0.00770564
		1260.59	0.00769552
		1261.47	0.00768392
		1262.35	0.00767081
		1263.24	0.00765617
		1264.12	0.00763998
		1265	0.0076222
		1265.88	0.00760283
		1266.76	0.00758182
		1267.65	0.00755915
		1268.53	0.00753481
		1269.41	0.00750875
		1270.29	0.00748097
		1271.18	0.00745143
		1272.06	0.00742011
		1272.94	0.00738699
		1273.82	0.00735205
		1274.71	0.00731527
		1275.59	0.00727663
		1276.47	0.00723612
		1277.35	0.00719372
		1278.24	0.00714942
		1279.12	0.00710322
		1280	0.0070551
		1280.88	0.00700506
		1281.76	0.00695311
		1282.65	0.00689924
		1283.53	0.00684346
		1284.41	0.00678578
		1285.29	0.00672622
		1286.18	0.00666478
		1287.06	0.00660148
		1287.94	0.00653635
		1288.82	0.00646942
		1289.71	0.00640071
		1290.59	0.00633025
		1291.47	0.00625809
		1292.35	0.00618426
		1293.24	0.00610881
		1294.12	0.00603178
		1295	0.00595323
		1295.88	0.00587319
		1296.76	0.00579174
		1297.65	0.00570894
		1298.53	0.00562483
		1299.41	0.0055395
		1300.29	0.005453
		1301.18	0.0053654
		1302.06	0.00527679
		1302.94	0.00518722
		1303.82	0.00509679
		1304.71	0.00500556
		1305.59	0.00491361
		1306.47	0.00482103
		1307.35	0.0047279
		1308.24	0.00463429
		1309.12	0.0045403
		1310	0.004446
		1310.88	0.00435149
		1311.76	0.00425683
		1312.65	0.00416212
		1313.53	0.00406744
		1314.41	0.00397287
		1315.29	0.0038785
		1316.18	0.0037844
		1317.06	0.00369065
		1317.94	0.00359734
		1318.82	0.00350453
		1319.71	0.00341231
		1320.59	0.00332074
		1321.47	0.0032299
		1322.35	0.00313985
		1323.24	0.00305067
		1324.12	0.00296241
		1325	0.00287514
		1325.88	0.00278892
		1326.76	0.0027038
		1327.65	0.00261983
		1328.53	0.00253708
		1329.41	0.00245557
		1330.29	0.00237536
		1331.18	0.0022965
		1332.06	0.00221901
		1332.94	0.00214293
		1333.82	0.00206831
		1334.71	0.00199515
		1335.59	0.0019235
		1336.47	0.00185337
		1337.35	0.00178478
		1338.24	0.00171776
		1339.12	0.00165231
		1340	0.00158845
		1340.88	0.00152619
		1341.76	0.00146552
		1342.65	0.00140646
		1343.53	0.00134901
		1344.41	0.00129315
		1345.29	0.0012389
		1346.18	0.00118623
		1347.06	0.00113515
		1347.94	0.00108564
		1348.82	0.00103768
		1349.71	0.000991271
		1350.59	0.000946384
		1351.47	0.000903005
		1352.35	0.000861111
		1353.24	0.000820683
		1354.12	0.000781695
		1355	0.000744125
		1355.88	0.000707946
		1356.76	0.000673132
		1357.65	0.000639654
		1358.53	0.000607485
		1359.41	0.000576595
		1360.29	0.000546954
		1361.18	0.000518532
		1362.06	0.000491298
		1362.94	0.00046522
		1363.82	0.000440266
		1364.71	0.000416405
		1365.59	0.00039357
		1366.47	0.000371802
		1367.35	0.000351031
		1368.24	0.000331224
		1369.12	0.00031235
		1370	0.000294341
		1370.88	0.000277242
		1371.76	0.000260946
		1372.65	0.000245497
		1373.53	0.00023079
		1374.41	0.00021687
		1375.29	0.000203569
		1376.18	0.000191032
		1377.06	0.000179195
		1377.94	0.000167958
		1378.82	0.000157364
		1379.71	0.00014735
		1380.59	0.000137892
		1381.47	0.000128963
		1382.35	0.000120508
		1383.24	0.000112503
		1384.12	0.000105033
		1385	9.79668e-05
		1385.88	9.13542e-05
		1386.76	8.5137e-05
		1387.65	7.92954e-05
		1388.53	7.38104e-05
		1389.41	6.8629e-05
		1390.29	6.38064e-05
		1391.18	5.92871e-05
		1392.06	5.50549e-05
		1392.94	5.10942e-05
		1393.82	4.739e-05
		1394.71	4.3928e-05
		1395.59	4.06945e-05
		1396.47	3.76764e-05
		1397.35	3.48612e-05
		1398.24	3.22371e-05
		1399.12	2.97926e-05
		IsoLine	IsoLine

## Sheet: Table S11
	Supplemental Table S11. Results of the plagioclase-liquid thermometers for basaltic glasses and its mineral hosted melt inclusions of the studied PUBs
	Zone	Sample	Type	SiO2	TiO2	Al2O3	FeOt	MnO	MgO	CaO	Na2O	K2O	Cr2O3	P2O5		Pl spot	No.	SiO2	TiO2	Al2O3	FeO	MnO	MgO	CaO	Na2O	K2O	Cr2O3	NiO	P2O5	Total	An	Or	Ab		KD(An-Ab)pl-liq	MEP (kbar)	T (°C), equation 24a	σ (°C)
	Segment 27	34TVG-6MI	MI in Pl	49.4772	1.01541	15.7703	8.55839	0.212038	8.35782	13.4309	2.4166	0.039216	0.044866	0		34TVG-6	276	46.976	0.024	32.856	0.384	0.02	0.191	17.196	1.814	0.043	0.025	0.011		99.54	83.7614	0.249384	15.9892		0.220223	1.49563	1213.14	36
	Segment 28	30TVG-4-2MI	MIin Pl	49.1515	0.89986	16.3161	7.605	0.21895	9.44243	14.2209	2.04789	0.0191	0.068815	0		30TVG-4-2	281	47.153	0.015	32.797	0.357	0	0.242	17.253	1.989	0.004	0.059	0		99.869	82.7205	0.0228346	17.2567		0.313176	2.22339	1221.91	36
	Mountain Jourdanne	30I-2-1-1MI	MI in Pl	51.6978	1.33682	16.7895	7.5205	0.10901	6.61494	10.8075	3.40298	0.23864	0.030385	0		30I-2-1-1	191	50.92	0	30.283	0.292	0.023	0.177	14.075	3.758	0.041	0.013	0.057		99.639	67.2668	0.233303	32.4999		0.324533	5.2798	1227.83	36
	Mountain Jourdanne	30I-2-1-2MI	MI in Pl	51.0463	1.36411	16.7362	7.5084	0.163427	6.55861	10.5763	4.04288	0.249208	0.053738	0		30I-2-1-2	193	50.714	0.043	30.318	0.303	0	0.174	14.221	3.37	0.052	0.03	0		99.225	69.7753	0.30378	29.9209		0.239526	5.67344	1229.33	36
	Mountain Jourdanne	30I-2-1-2MI-2	MI in Pl	51.4126	1.19759	16.6681	7.47679	0.1368	6.53155	10.8338	3.99381	0.23896	0.06648	0		30I-2-1-2	193	50.714	0.043	30.318	0.303	0	0.174	14.221	3.37	0.052	0.03	0		99.225	69.7753	0.30378	29.9209		0.2456	4.51129	1222.01	36
	Mountain Jourdanne	30I-2-1-3 mi-1	MI in Pl	51.1618	1.40091	16.4191	7.8181	0.166104	6.25738	10.8794	4.35009	0.275686	0.056791	0		30I-2-1-3 Line 008	203	50.611	0	30.271	0.399	0.006	0.182	14.233	3.764	0.026	0.012	0.008		99.512	67.5345	0.146888	32.3186		0.250139	3.7961	1210.12	36
	Mountain Jourdanne	30I-2-1-3 mi-2	MI in Pl	51.2222	1.3001	16.7699	7.80885	0.1449	6.57418	10.7318	4.22793	0.259352	0.034224	0		30I-2-1-3 Line 008	203	50.611	0	30.271	0.399	0.006	0.182	14.233	3.764	0.026	0.012	0.008		99.512	67.5345	0.146888	32.3186		0.258993	4.88214	1219.17	36
	Mountain Jourdanne	30I-2-1-3	MI in Pl	51.0782	1.0776	16.6034	7.52875	0.15145	6.4414	10.0347	4.47605	0.282	0.0238	0.2071		30I-2-1-3PL	19	50.663	0.044	30.329	0.342	0.008	0.179	14.132	3.793	0.054	0.001		0	99.545	67.1036	0.305295	32.5911		0.230497	4.9829	1216.12	36
	Mountain Jourdanne	30I-2-1-4	MI in Pl	49.8624	1.50024	16.2187	8.7682	0.174956	6.10026	9.85407	4.6566	0.3641	0.016762	0.185368		30I-2-1-4PL	21	49.467	0.038	31.343	0.331	0.031	0.132	14.93	3.22	0.019	0		0	99.511	71.85	0.108869	28.0412		0.174946	5.09897	1214.62	36
	Mountain Jourdanne	30I-2-1-5	MI in Pl	50.6398	0.85156	16.6732	7.3593	0.136328	6.50324	10.4483	4.30265	0.265672	0.029264	0.105008		30I-2-1-5PL	23	49.895	0.035	30.566	0.318	0.007	0.169	14.365	3.555	0.041	0		0.004	98.955	68.9074	0.234168	30.8584		0.233178	4.62113	1219.68	36
	Mountain Jourdanne	30I-2-1-7	MI in Pl	50.8482	0.872332	16.6624	7.17047	0.12218	6.47554	10.5152	4.20337	0.278756	0.043148	0.137506		30I-2-1-7PL	28	50.337	0.015	30.3	0.309	0.019	0.19	13.938	3.634	0.033	0		0.009	98.784	67.8141	0.191169	31.9947		0.251875	4.45289	1218.04	36
	Mountain Jourdanne	30I-2-1-8	MI in Pl	50.2375	0.930744	17.2069	6.85302	0.129652	6.98709	10.8184	3.99486	0.267688	0.050676	0.117566		30I-2-1-8PL	30	49.857	0.003	30.584	0.251	0.001	0.164	14.514	3.473	0.043	0.009		0.017	98.916	69.6122	0.245556	30.1423		0.261561	5.79203	1233.8	36
	Mountain Jourdanne	30I-2-1-10	MI in Pl	50.4176	1.10968	16.7536	7.42733	0.17914	6.63535	10.3257	4.44544	0.277572	0.027318	0.162068		30I-2-1-10PL	35	50.363	0	30.747	0.319	0.019	0.177	14.186	3.673	0.027	0		0.017	99.528	67.9905	0.154077	31.8554		0.235509	5.27059	1220.64	36
	Mountain Jourdanne	30I-2-1-10-2	MI in Pl	50.376	1.17787	16.8802	7.20103	0.194014	6.6803	9.98659	4.36287	0.310356	0.057412	0.203126		30I-2-1-10PL	35	50.363	0	30.747	0.319	0.019	0.177	14.186	3.673	0.027	0		0.017	99.528	67.9905	0.154077	31.8554		0.234032	6.10468	1226.32	36
	Mountain Jourdanne	30I-2-1-12	MI in Pl	50.0203	1.15954	16.5448	7.8715	0.13808	6.40598	10.3969	4.24774	0.275272	0.029832	0.270296		30I-2-1-12PL	40	50.428	0.044	30.979	0.324	0.007	0.172	14.078	3.718	0.033	0		0	99.783	67.5358	0.188491	32.2757		0.251969	5.08746	1219.15	36
	Mountain Jourdanne	30I-2-1-20	MI in Pl	50.1997	1.19151	16.894	6.90974	0.147208	6.70602	10.292	4.37818	0.283696	0.08056	0.195624		30I-2-1-20PL	56	50.034	0.029	31.021	0.31	0.004	0.169	14.314	3.591	0.016	0.001		0	99.489	68.7143	0.0914513	31.1943		0.233888	5.8345	1227.34	36
	Mountain Jourdanne	30I-TVG02-1	basaltic glass	51.02	0.988	19.62	5.94776	0.108	5.58	11.09	3.78	0.2	0	0.118		30I-2-1-1	191	50.92	0	30.283	0.292	0.023	0.177	14.075	3.758	0.041	0.013	0.057		99.639	67.2668	0.233303	32.4999		0.354996	9.36674	1281.18	36
	Mountain Jourdanne	30I-TVG02-1	basaltic glass	51.02	0.988	19.62	5.94776	0.108	5.58	11.09	3.78	0.2	0	0.118		30I-2-1-2	193	50.714	0.043	30.318	0.303	0	0.174	14.221	3.37	0.052	0.03	0		99.225	69.7753	0.30378	29.9209		0.315076	9.36674	1284.38	36
	Mountain Jourdanne	30I-TVG02-1	basaltic glass	51.02	0.988	19.62	5.94776	0.108	5.58	11.09	3.78	0.2	0	0.118		30I-2-1-2	193	50.714	0.043	30.318	0.303	0	0.174	14.221	3.37	0.052	0.03	0		99.225	69.7753	0.30378	29.9209		0.315076	9.36674	1284.38	36
	Mountain Jourdanne	30I-TVG02-1	basaltic glass	51.02	0.988	19.62	5.94776	0.108	5.58	11.09	3.78	0.2	0	0.118		30I-2-1-3 Line 008	203	50.611	0	30.271	0.399	0.006	0.182	14.233	3.764	0.026	0.012	0.008		99.512	67.5345	0.146888	32.3186		0.351616	9.36674	1281.31	36
	Mountain Jourdanne	30I-TVG02-1	basaltic glass	51.02	0.988	19.62	5.94776	0.108	5.58	11.09	3.78	0.2	0	0.118		30I-2-1-3 Line 008	203	50.611	0	30.271	0.399	0.006	0.182	14.233	3.764	0.026	0.012	0.008		99.512	67.5345	0.146888	32.3186		0.351616	9.36674	1281.31	36
	Mountain Jourdanne	30I-TVG02-1	basaltic glass	51.02	0.988	19.62	5.94776	0.108	5.58	11.09	3.78	0.2	0	0.118		30I-2-1-3PL	19	50.663	0.044	30.329	0.342	0.008	0.179	14.132	3.793	0.054	0.001		0	99.545	67.1036	0.305295	32.5911		0.356857	9.36674	1281.14	36
	Mountain Jourdanne	30I-TVG02-1	basaltic glass	51.02	0.988	19.62	5.94776	0.108	5.58	11.09	3.78	0.2	0	0.118		30I-2-1-4PL	21	49.467	0.038	31.343	0.331	0.031	0.132	14.93	3.22	0.019	0		0	99.511	71.85	0.108869	28.0412		0.286755	9.36674	1286.22	36
	Mountain Jourdanne	30I-TVG02-1	basaltic glass	51.02	0.988	19.62	5.94776	0.108	5.58	11.09	3.78	0.2	0	0.118		30I-2-1-5PL	23	49.895	0.035	30.566	0.318	0.007	0.169	14.365	3.555	0.041	0		0.004	98.955	68.9074	0.234168	30.8584		0.329041	9.36674	1283.21	36
	Mountain Jourdanne	30I-TVG02-1	basaltic glass	51.02	0.988	19.62	5.94776	0.108	5.58	11.09	3.78	0.2	0	0.118		30I-2-1-7PL	28	50.337	0.015	30.3	0.309	0.019	0.19	13.938	3.634	0.033	0		0.009	98.784	67.8141	0.191169	31.9947		0.346657	9.36674	1281.77	36
	Mountain Jourdanne	30I-TVG02-1	basaltic glass	51.02	0.988	19.62	5.94776	0.108	5.58	11.09	3.78	0.2	0	0.118		30I-2-1-8PL	30	49.857	0.003	30.584	0.251	0.001	0.164	14.514	3.473	0.043	0.009		0.017	98.916	69.6122	0.245556	30.1423		0.318151	9.36674	1284.07	36
	Mountain Jourdanne	30I-TVG02-1	basaltic glass	51.02	0.988	19.62	5.94776	0.108	5.58	11.09	3.78	0.2	0	0.118		30I-2-1-10PL	35	50.363	0	30.747	0.319	0.019	0.177	14.186	3.673	0.027	0		0.017	99.528	67.9905	0.154077	31.8554		0.344252	9.36674	1281.9	36
	Mountain Jourdanne	30I-TVG02-1	basaltic glass	51.02	0.988	19.62	5.94776	0.108	5.58	11.09	3.78	0.2	0	0.118		30I-2-1-10PL	35	50.363	0	30.747	0.319	0.019	0.177	14.186	3.673	0.027	0		0.017	99.528	67.9905	0.154077	31.8554		0.344252	9.36674	1281.9	36
	Mountain Jourdanne	30I-TVG02-1	basaltic glass	51.02	0.988	19.62	5.94776	0.108	5.58	11.09	3.78	0.2	0	0.118		30I-2-1-12PL	40	50.428	0.044	30.979	0.324	0.007	0.172	14.078	3.718	0.033	0		0	99.783	67.5358	0.188491	32.2757		0.351143	9.36674	1281.41	36
	Mountain Jourdanne	30I-TVG02-1	basaltic glass	51.02	0.988	19.62	5.94776	0.108	5.58	11.09	3.78	0.2	0	0.118		30I-2-1-20PL	56	50.034	0.029	31.021	0.31	0.004	0.169	14.314	3.591	0.016	0.001		0	99.489	68.7143	0.0914513	31.1943		0.333557	9.36674	1282.65	36
																																					1210.12
																																					1286.22
