# Supplementary material for: Magmatic processes within the plumbing system of the ultraslow-spreading southwest Indian ridge: constraints from olivine, plagioclase and melt inclusions
Source: Springer Nature journal article supplement (doi:10.1007/s00410-024-02098-0), 2024-02-22
Supplement: MOESM13 [file 410_2024_2098_MOESM13_ESM.xls]

## Sheet: PlotDat2
Source sheet	Table S13	-6	0.000485392	-0.15	0	-6	0
Plot name	ProbDens2	-5.96176	0.000522273	0.175	0	6.96176	0
Plot Type	16	-5.92353	0.000561706	0.175	2
1st free col	9	-5.88529	0.000603849	-0.15	2
Sigma Level	1	-5.84706	0.000648867	-0.15	0
Absolute Errs	TRUE	-5.80882	0.000696933	ErrBox	ErrBox
Symbol Type	1	-5.77059	0.000748227	0.175	0
Inverse Plot	FALSE	-5.73235	0.000802941	0.5	0
Color Plot	TRUE	-5.69412	0.000861275	0.5	1
3D plot	FALSE	-5.65588	0.000923438	0.175	1
Linear	FALSE	-5.61765	0.000989649	0.175	0
Data Range	BF5:BG9	-5.57941	0.00106014	ErrBox	ErrBox
Filled Symbols	TRUE	-5.54118	0.00113515	0.5	0
ConcAge	FALSE	-5.50294	0.00121492	0.825	0
ConcSwap	FALSE	-5.46471	0.00129973	0.825	2
1st Symbol-row	1	-5.42647	0.00138984	0.5	2
		-5.38824	0.00148555	0.5	0
		-5.35	0.00158714	ErrBox	ErrBox
		-5.31176	0.00169493
		-5.27353	0.00180923
		-5.23529	0.00193039
		-5.19706	0.00205876
		-5.15882	0.00219469
		-5.12059	0.00233856
		-5.08235	0.00249076
		-5.04412	0.00265169
		-5.00588	0.00282178
		-4.96765	0.00300144
		-4.92941	0.00319113
		-4.89118	0.00339132
		-4.85294	0.00360246
		-4.81471	0.00382506
		-4.77647	0.00405962
		-4.73824	0.00430667
		-4.7	0.00456672
		-4.66176	0.00484034
		-4.62353	0.00512808
		-4.58529	0.00543053
		-4.54706	0.00574828
		-4.50882	0.00608193
		-4.47059	0.00643211
		-4.43235	0.00679944
		-4.39412	0.00718458
		-4.35588	0.00758818
		-4.31765	0.00801091
		-4.27941	0.00845346
		-4.24118	0.00891652
		-4.20294	0.00940079
		-4.16471	0.00990698
		-4.12647	0.0104358
		-4.08824	0.010988
		-4.05	0.0115644
		-4.01176	0.0121656
		-3.97353	0.0127924
		-3.93529	0.0134455
		-3.89706	0.0141258
		-3.85882	0.0148339
		-3.82059	0.0155706
		-3.78235	0.0163368
		-3.74412	0.0171331
		-3.70588	0.0179602
		-3.66765	0.018819
		-3.62941	0.0197101
		-3.59118	0.0206344
		-3.55294	0.0215924
		-3.51471	0.022585
		-3.47647	0.0236127
		-3.43824	0.0246764
		-3.4	0.0257766
		-3.36176	0.026914
		-3.32353	0.0280891
		-3.28529	0.0293027
		-3.24706	0.0305552
		-3.20882	0.0318472
		-3.17059	0.0331792
		-3.13235	0.0345516
		-3.09412	0.035965
		-3.05588	0.0374197
		-3.01765	0.0389161
		-2.97941	0.0404544
		-2.94118	0.0420351
		-2.90294	0.0436583
		-2.86471	0.0453241
		-2.82647	0.0470328
		-2.78824	0.0487844
		-2.75	0.050579
		-2.71176	0.0524164
		-2.67353	0.0542967
		-2.63529	0.0562197
		-2.59706	0.0581851
		-2.55882	0.0601927
		-2.52059	0.0622421
		-2.48235	0.064333
		-2.44412	0.0664648
		-2.40588	0.0686371
		-2.36765	0.0708491
		-2.32941	0.0731002
		-2.29118	0.0753896
		-2.25294	0.0777165
		-2.21471	0.08008
		-2.17647	0.0824789
		-2.13824	0.0849124
		-2.1	0.0873792
		-2.06176	0.0898781
		-2.02353	0.0924077
		-1.98529	0.0949667
		-1.94706	0.0975536
		-1.90882	0.100167
		-1.87059	0.102805
		-1.83235	0.105466
		-1.79412	0.108148
		-1.75588	0.11085
		-1.71765	0.113569
		-1.67941	0.116304
		-1.64118	0.119053
		-1.60294	0.121812
		-1.56471	0.124581
		-1.52647	0.127356
		-1.48824	0.130137
		-1.45	0.132919
		-1.41176	0.135701
		-1.37353	0.138481
		-1.33529	0.141255
		-1.29706	0.144021
		-1.25882	0.146777
		-1.22059	0.14952
		-1.18235	0.152248
		-1.14412	0.154957
		-1.10588	0.157644
		-1.06765	0.160308
		-1.02941	0.162945
		-0.991176	0.165553
		-0.952941	0.168129
		-0.914706	0.170669
		-0.876471	0.173172
		-0.838235	0.175634
		-0.8	0.178053
		-0.761765	0.180426
		-0.723529	0.18275
		-0.685294	0.185023
		-0.647059	0.187242
		-0.608824	0.189404
		-0.570588	0.191507
		-0.532353	0.193548
		-0.494118	0.195525
		-0.455882	0.197435
		-0.417647	0.199276
		-0.379412	0.201046
		-0.341176	0.202743
		-0.302941	0.204364
		-0.264706	0.205908
		-0.226471	0.207372
		-0.188235	0.208755
		-0.15	0.210054
		-0.111765	0.211269
		-0.0735294	0.212398
		-0.0352941	0.213439
		0.00294118	0.214391
		0.0411765	0.215252
		0.0794118	0.216022
		0.117647	0.216699
		0.155882	0.217283
		0.194118	0.217773
		0.232353	0.218169
		0.270588	0.218468
		0.308824	0.218673
		0.347059	0.218781
		0.385294	0.218793
		0.423529	0.218709
		0.461765	0.218529
		0.5	0.218254
		0.538235	0.217883
		0.576471	0.217417
		0.614706	0.216857
		0.652941	0.216203
		0.691176	0.215457
		0.729412	0.214619
		0.767647	0.21369
		0.805882	0.212672
		0.844118	0.211566
		0.882353	0.210373
		0.920588	0.209095
		0.958824	0.207733
		0.997059	0.20629
		1.03529	0.204767
		1.07353	0.203166
		1.11176	0.201489
		1.15	0.199738
		1.18824	0.197915
		1.22647	0.196023
		1.26471	0.194064
		1.30294	0.192039
		1.34118	0.189953
		1.37941	0.187807
		1.41765	0.185603
		1.45588	0.183345
		1.49412	0.181035
		1.53235	0.178675
		1.57059	0.176269
		1.60882	0.173819
		1.64706	0.171327
		1.68529	0.168797
		1.72353	0.166232
		1.76176	0.163633
		1.8	0.161005
		1.83824	0.158349
		1.87647	0.155669
		1.91471	0.152967
		1.95294	0.150245
		1.99118	0.147508
		2.02941	0.144756
		2.06765	0.141994
		2.10588	0.139223
		2.14412	0.136446
		2.18235	0.133666
		2.22059	0.130885
		2.25882	0.128106
		2.29706	0.125331
		2.33529	0.122562
		2.37353	0.119801
		2.41176	0.117051
		2.45	0.114315
		2.48824	0.111593
		2.52647	0.108888
		2.56471	0.106202
		2.60294	0.103537
		2.64118	0.100894
		2.67941	0.0982757
		2.71765	0.0956833
		2.75588	0.0931183
		2.79412	0.0905823
		2.83235	0.0880767
		2.87059	0.0856027
		2.90882	0.0831618
		2.94706	0.0807549
		2.98529	0.0783833
		3.02353	0.0760479
		3.06176	0.0737497
		3.1	0.0714895
		3.13824	0.0692681
		3.17647	0.0670863
		3.21471	0.0649447
		3.25294	0.0628439
		3.29118	0.0607843
		3.32941	0.0587663
		3.36765	0.0567904
		3.40588	0.0548568
		3.44412	0.0529658
		3.48235	0.0511175
		3.52059	0.0493121
		3.55882	0.0475495
		3.59706	0.0458297
		3.63529	0.0441528
		3.67353	0.0425185
		3.71176	0.0409267
		3.75	0.0393772
		3.78824	0.0378698
		3.82647	0.036404
		3.86471	0.0349796
		3.90294	0.0335961
		3.94118	0.0322532
		3.97941	0.0309504
		4.01765	0.0296871
		4.05588	0.0284629
		4.09412	0.0272772
		4.13235	0.0261294
		4.17059	0.0250188
		4.20882	0.023945
		4.24706	0.0229072
		4.28529	0.0219047
		4.32353	0.0209368
		4.36176	0.020003
		4.4	0.0191024
		4.43824	0.0182343
		4.47647	0.017398
		4.51471	0.0165928
		4.55294	0.0158179
		4.59118	0.0150725
		4.62941	0.014356
		4.66765	0.0136675
		4.70588	0.0130063
		4.74412	0.0123716
		4.78235	0.0117628
		4.82059	0.0111789
		4.85882	0.0106194
		4.89706	0.0100835
		4.93529	0.00957038
		4.97353	0.00907938
		5.01176	0.00860979
		5.05	0.00816089
		5.08824	0.00773199
		5.12647	0.00732241
		5.16471	0.00693148
		5.20294	0.00655853
		5.24118	0.00620291
		5.27941	0.005864
		5.31765	0.00554117
		5.35588	0.0052338
		5.39412	0.00494131
		5.43235	0.00466311
		5.47059	0.00439863
		5.50882	0.00414733
		5.54706	0.00390867
		5.58529	0.00368212
		5.62353	0.00346717
		5.66176	0.00326333
		5.7	0.00307012
		5.73824	0.00288709
		5.77647	0.00271376
		5.81471	0.00254972
		5.85294	0.00239454
		5.89118	0.00224782
		5.92941	0.00210916
		5.96765	0.00197817
		6.00588	0.00185451
		6.04412	0.00173781
		6.08235	0.00162774
		6.12059	0.00152396
		6.15882	0.00142618
		6.19706	0.00133408
		6.23529	0.00124738
		6.27353	0.0011658
		6.31176	0.00108907
		6.35	0.00101695
		6.38824	0.000949179
		6.42647	0.000885538
		6.46471	0.0008258
		6.50294	0.000769752
		6.54118	0.000717193
		6.57941	0.000667927
		6.61765	0.000621771
		6.65588	0.00057855
		6.69412	0.000538095
		6.73235	0.000500249
		6.77059	0.00046486
		6.80882	0.000431783
		6.84706	0.000400883
		6.88529	0.000372031
		6.92353	0.000345102
		6.96176	0.000319982
		IsoLine	IsoLine

## Sheet: PlotDat3
Source sheet	Table S13	-6	0.000164366	0.175	0	-6	0
Plot name	ProbDens3	-5.96176	0.000178099	0.5	0	6.96176	0
Plot Type	16	-5.92353	0.000192893	0.5	2
1st free col	9	-5.88529	0.000208823	0.175	2
Sigma Level	1	-5.84706	0.000225966	0.175	0
Absolute Errs	TRUE	-5.80882	0.000244409	ErrBox	ErrBox
Symbol Type	1	-5.77059	0.000264238	0.5	0
Inverse Plot	FALSE	-5.73235	0.000285548	0.825	0
Color Plot	TRUE	-5.69412	0.000308438	0.825	10
3D plot	FALSE	-5.65588	0.000333015	0.5	10
Linear	FALSE	-5.61765	0.00035939	0.5	0
Data Range	BF10:BG70	-5.57941	0.00038768	ErrBox	ErrBox
Filled Symbols	TRUE	-5.54118	0.000418011	0.825	0
ConcAge	FALSE	-5.50294	0.000450513	1.15	0
ConcSwap	FALSE	-5.46471	0.000485325	1.15	49
1st Symbol-row	1	-5.42647	0.000522594	0.825	49
		-5.38824	0.000562473	0.825	0
		-5.35	0.000605125	ErrBox	ErrBox
		-5.31176	0.000650721
		-5.27353	0.00069944
		-5.23529	0.000751472
		-5.19706	0.000807013
		-5.15882	0.000866272
		-5.12059	0.000929468
		-5.08235	0.000996829
		-5.04412	0.0010686
		-5.00588	0.00114502
		-4.96765	0.00122636
		-4.92941	0.00131289
		-4.89118	0.0014049
		-4.85294	0.00150268
		-4.81471	0.00160656
		-4.77647	0.00171685
		-4.73824	0.00183389
		-4.7	0.00195804
		-4.66176	0.00208966
		-4.62353	0.00222913
		-4.58529	0.00237686
		-4.54706	0.00253324
		-4.50882	0.0026987
		-4.47059	0.00287369
		-4.43235	0.00305866
		-4.39412	0.00325408
		-4.35588	0.00346045
		-4.31765	0.00367826
		-4.27941	0.00390803
		-4.24118	0.0041503
		-4.20294	0.00440563
		-4.16471	0.00467458
		-4.12647	0.00495773
		-4.08824	0.00525569
		-4.05	0.00556907
		-4.01176	0.00589849
		-3.97353	0.00624462
		-3.93529	0.0066081
		-3.89706	0.00698961
		-3.85882	0.00738985
		-3.82059	0.00780952
		-3.78235	0.00824933
		-3.74412	0.00871002
		-3.70588	0.00919232
		-3.66765	0.00969699
		-3.62941	0.0102248
		-3.59118	0.0107765
		-3.55294	0.0113529
		-3.51471	0.0119548
		-3.47647	0.0125829
		-3.43824	0.0132382
		-3.4	0.0139213
		-3.36176	0.0146331
		-3.32353	0.0153744
		-3.28529	0.016146
		-3.24706	0.0169488
		-3.20882	0.0177834
		-3.17059	0.0186509
		-3.13235	0.0195518
		-3.09412	0.0204871
		-3.05588	0.0214575
		-3.01765	0.0224637
		-2.97941	0.0235066
		-2.94118	0.0245869
		-2.90294	0.0257052
		-2.86471	0.0268623
		-2.82647	0.0280589
		-2.78824	0.0292955
		-2.75	0.0305729
		-2.71176	0.0318917
		-2.67353	0.0332523
		-2.63529	0.0346554
		-2.59706	0.0361014
		-2.55882	0.0375908
		-2.52059	0.039124
		-2.48235	0.0407013
		-2.44412	0.042323
		-2.40588	0.0439896
		-2.36765	0.0457011
		-2.32941	0.0474577
		-2.29118	0.0492596
		-2.25294	0.0511067
		-2.21471	0.0529991
		-2.17647	0.0549367
		-2.13824	0.0569194
		-2.1	0.0589469
		-2.06176	0.0610189
		-2.02353	0.0631352
		-1.98529	0.0652952
		-1.94706	0.0674985
		-1.90882	0.0697444
		-1.87059	0.0720324
		-1.83235	0.0743617
		-1.79412	0.0767313
		-1.75588	0.0791405
		-1.71765	0.0815883
		-1.67941	0.0840735
		-1.64118	0.086595
		-1.60294	0.0891515
		-1.56471	0.0917417
		-1.52647	0.0943642
		-1.48824	0.0970174
		-1.45	0.0996998
		-1.41176	0.10241
		-1.37353	0.105145
		-1.33529	0.107905
		-1.29706	0.110686
		-1.25882	0.113487
		-1.22059	0.116306
		-1.18235	0.119141
		-1.14412	0.121989
		-1.10588	0.124848
		-1.06765	0.127716
		-1.02941	0.13059
		-0.991176	0.133468
		-0.952941	0.136346
		-0.914706	0.139224
		-0.876471	0.142097
		-0.838235	0.144963
		-0.8	0.147819
		-0.761765	0.150663
		-0.723529	0.153491
		-0.685294	0.156301
		-0.647059	0.159089
		-0.608824	0.161853
		-0.570588	0.16459
		-0.532353	0.167297
		-0.494118	0.169971
		-0.455882	0.172608
		-0.417647	0.175206
		-0.379412	0.177763
		-0.341176	0.180274
		-0.302941	0.182736
		-0.264706	0.185148
		-0.226471	0.187507
		-0.188235	0.189808
		-0.15	0.19205
		-0.111765	0.19423
		-0.0735294	0.196344
		-0.0352941	0.198392
		0.00294118	0.200369
		0.0411765	0.202273
		0.0794118	0.204103
		0.117647	0.205855
		0.155882	0.207527
		0.194118	0.209118
		0.232353	0.210625
		0.270588	0.212046
		0.308824	0.21338
		0.347059	0.214624
		0.385294	0.215777
		0.423529	0.216838
		0.461765	0.217805
		0.5	0.218676
		0.538235	0.219451
		0.576471	0.220129
		0.614706	0.220709
		0.652941	0.22119
		0.691176	0.221571
		0.729412	0.221852
		0.767647	0.222033
		0.805882	0.222113
		0.844118	0.222092
		0.882353	0.221971
		0.920588	0.221749
		0.958824	0.221427
		0.997059	0.221006
		1.03529	0.220486
		1.07353	0.219867
		1.11176	0.219151
		1.15	0.218338
		1.18824	0.21743
		1.22647	0.216429
		1.26471	0.215334
		1.30294	0.214148
		1.34118	0.212873
		1.37941	0.21151
		1.41765	0.210061
		1.45588	0.208528
		1.49412	0.206912
		1.53235	0.205217
		1.57059	0.203444
		1.60882	0.201596
		1.64706	0.199674
		1.68529	0.197682
		1.72353	0.195621
		1.76176	0.193495
		1.8	0.191307
		1.83824	0.189057
		1.87647	0.186751
		1.91471	0.18439
		1.95294	0.181976
		1.99118	0.179514
		2.02941	0.177006
		2.06765	0.174454
		2.10588	0.171862
		2.14412	0.169233
		2.18235	0.166569
		2.22059	0.163874
		2.25882	0.16115
		2.29706	0.1584
		2.33529	0.155628
		2.37353	0.152835
		2.41176	0.150025
		2.45	0.147202
		2.48824	0.144366
		2.52647	0.141522
		2.56471	0.138672
		2.60294	0.135818
		2.64118	0.132964
		2.67941	0.130111
		2.71765	0.127263
		2.75588	0.124421
		2.79412	0.121588
		2.83235	0.118767
		2.87059	0.115959
		2.90882	0.113167
		2.94706	0.110393
		2.98529	0.107639
		3.02353	0.104906
		3.06176	0.102197
		3.1	0.0995141
		3.13824	0.0968578
		3.17647	0.0942303
		3.21471	0.091633
		3.25294	0.0890675
		3.29118	0.0865352
		3.32941	0.0840372
		3.36765	0.0815749
		3.40588	0.0791493
		3.44412	0.0767615
		3.48235	0.0744124
		3.52059	0.072103
		3.55882	0.069834
		3.59706	0.0676061
		3.63529	0.0654201
		3.67353	0.0632764
		3.71176	0.0611756
		3.75	0.0591181
		3.78824	0.0571042
		3.82647	0.0551343
		3.86471	0.0532085
		3.90294	0.051327
		3.94118	0.0494898
		3.97941	0.0476971
		4.01765	0.0459487
		4.05588	0.0442446
		4.09412	0.0425846
		4.13235	0.0409685
		4.17059	0.0393962
		4.20882	0.0378672
		4.24706	0.0363812
		4.28529	0.0349379
		4.32353	0.0335369
		4.36176	0.0321776
		4.4	0.0308595
		4.43824	0.0295822
		4.47647	0.0283451
		4.51471	0.0271475
		4.55294	0.0259888
		4.59118	0.0248685
		4.62941	0.0237857
		4.66765	0.02274
		4.70588	0.0217304
		4.74412	0.0207564
		4.78235	0.0198171
		4.82059	0.0189118
		4.85882	0.0180398
		4.89706	0.0172003
		4.93529	0.0163925
		4.97353	0.0156156
		5.01176	0.0148689
		5.05	0.0141515
		5.08824	0.0134627
		5.12647	0.0128016
		5.16471	0.0121676
		5.20294	0.0115597
		5.24118	0.0109773
		5.27941	0.0104196
		5.31765	0.00988572
		5.35588	0.00937501
		5.39412	0.00888669
		5.43235	0.00842002
		5.47059	0.00797427
		5.50882	0.00754873
		5.54706	0.00714268
		5.58529	0.00675544
		5.62353	0.00638632
		5.66176	0.00603465
		5.7	0.00569979
		5.73824	0.00538109
		5.77647	0.00507792
		5.81471	0.00478968
		5.85294	0.00451577
		5.89118	0.0042556
		5.92941	0.00400863
		5.96765	0.00377429
		6.00588	0.00355204
		6.04412	0.00334139
		6.08235	0.00314181
		6.12059	0.00295282
		6.15882	0.00277395
		6.19706	0.00260475
		6.23529	0.00244476
		6.27353	0.00229357
		6.31176	0.00215076
		6.35	0.00201594
		6.38824	0.00188871
		6.42647	0.00176872
		6.46471	0.00165561
		6.50294	0.00154903
		6.54118	0.00144867
		6.57941	0.00135419
		6.61765	0.00126531
		6.65588	0.00118172
		6.69412	0.00110317
		6.73235	0.00102937
		6.77059	0.000960073
		6.80882	0.00089504
		6.84706	0.000834037
		6.88529	0.000776841
		6.92353	0.000723242
		6.96176	0.000673038
		IsoLine	IsoLine

## Sheet: Table S12
	Supplemental Table S12. Results of the calcium-in-olivine geohygrometer for basaltic glasses and its mineral hosted melt inclusions of the studied PUBs
								Compostion of starting materials														Melt compositions along olivine control line based on PRIMELT3 software (Herzberg and Asimow, 2015)															Equilibrium olivine composition (wt.% oxides)
	Data source	longitude（°E）	latitude（°S）	Deepth (m)	Zone	Sample or spot	Type	SiO2	TiO2	Al2O3	Cr2O3	FeO*	MnO	MgO	CaO	Na2O	K2O	NiO	P2O5	Mg#-starting material		%ol addition	SiO2	TiO2	Al2O3	Cr2O3	Fe2O3	FeO	MnO	MgO	CaO	Na2O	K2O	NiO	P2O5	Mg#	SiO2	TiO2	Al2O3	Cr2O3	Fe2O3	FeO	MnO	MgO	CaO	Na2O	K2O	NiO	P2O5
	This study	50.4853	37.697	1549	Segment 27	277	basaltic glass-EMPA	49.4772	1.01541	15.7703	0.044866	8.55839	0.212038	8.35782	13.4309	2.4166	0.039216	0.000594	0	63.5125		0	49.7666	1.02135	15.8625	0.0451284	0.956494	7.7476	0.213278	8.40671	13.5095	2.43074	0.0394454	0.000597475	0		40.0834	0.0337503	0.089167	0.025702	0.000105358	12.9019	0.278379	46.1467	0.432063	0.000267745	4.3449e-06	0.00853971	0
	This study	50.4853	37.697	1549	Segment 27	34TVG-6MI	MI in Pl-EMPA	49.4772	1.01541	15.7703		8.55839	0.212038	8.35782	13.4309	2.4166	0.039216			63.5125		0	49.7894	1.02181	15.8698	0	0.956932	7.75115	0.213376	8.41055	13.5157	2.43185	0.0394634	0	0		40.098	0.0337725	0.0892326	0	0.000105427	12.9065	0.278477	46.1614	0.432231	0.00026792	4.34774e-06	0	0
	（a）	51.56	37.43	1900-2700	segment 27	1-D-MI4	MI in Pl-EMPA	48.9048	0.5228	16.6088		9.0992	0.2176	8.53	13.204	1.928	0.0544		0.0272	62.5599		0	49.3002	0.527027	16.7431	0	1.0192	8.2555	0.219359	8.59897	13.3108	1.94359	0.0548399	0	0.0274199		40.0001	0.0174318	0.0952533	0	0.000112369	13.4948	0.278471	45.6979	0.415791	0.000214285	6.04621e-06	0	3.0231e-06
	（a）	51.56	37.43	1900-2700	segment 27	2-A-MI1	MI in Pl-EMPA	48.459	0.9694	15.689		8.0814	0.1322	8.2482	12.057	2.4286	0.1046		0.0764	64.5293		0	50.3023	1.00627	16.2858	0	0.932089	7.54992	0.137229	8.56194	12.5156	2.52098	0.108579	0	0.0793061		40.1894	0.033337	0.0920572	0	0.000102931	12.5328	0.177801	46.5763	0.397871	0.000278393	1.19904e-05	0	8.75781e-06
	（a）	51.56	37.43	1900-2700	segment 27	2-A-MI10	MI in Pl-EMPA	49.4115	0.7002	16.1636		8.3634	0.1652	8.2607	12.1996	2.8679	0.0485		0.097	63.7753		0	50.23	0.711799	16.4313	0	0.94466	7.65174	0.167936	8.39754	12.4017	2.91541	0.0493034	0	0.0986068		40.1465	0.0234467	0.0919123	0	0.000103724	12.7662	0.220158	46.3534	0.397996	0.000320112	5.41352e-06	0	1.0827e-05
	（a）	51.56	37.43	1900-2700	segment 27	2-A-MI2	MI in Pl-EMPA	49.7765	0.377	16.255		8.4555	0.1375	8.5005	11.8795	2.6045	0.0795		0.0115	64.1824		0	50.7039	0.384024	16.5579	0	0.957004	7.75173	0.140062	8.65888	12.1008	2.65303	0.0809812	0	0.0117143		40.1669	0.0126847	0.0936856	0	0.000105369	12.7525	0.179124	46.4145	0.38027	0.000292107	8.9163e-06	0	1.28978e-06
	（a）	51.56	37.43	1900-2700	segment 27	2-A-MI3	MI in Pl-EMPA	50.4101	0.5629	16.2439		8.369	0.1524	8.3023	11.7188	2.3674	0.0645		0.0378	63.8758		0	51.2704	0.572506	16.5211	0	0.945758	7.66064	0.155001	8.44398	11.9188	2.4078	0.0656007	0	0.0384451		40.1048	0.0189889	0.093317	0	0.000104563	13.0326	0.202269	46.1663	0.381304	0.000266206	7.25281e-06	0	4.25048e-06
	（a）	51.56	37.43	1900-2700	segment 27	2-A-MI4	MI in Pl-EMPA	49.9394	0.3506	15.6454		8.2827	0.1927	8.5733	11.6725	2.7022	0.0635		0.0287	64.8503		0	51.1973	0.359431	16.0395	0	0.943481	7.6422	0.197554	8.78925	11.9665	2.77026	0.0650995	0	0.0294229		40.2118	0.0118688	0.0911351	0	0.000103849	12.4596	0.250185	46.6021	0.372946	0.000304923	7.16549e-06	0	3.23858e-06
	（a）	51.56	37.43	1900-2700	segment 27	2-A-MI5	MI in Pl-EMPA	50.4266	0.4376	16.15		8.3262	0.1579	8.5124	11.7073	1.954	0.0722		0.0026	64.5679		0	51.5402	0.447264	16.5067	0	0.945564	7.65907	0.161387	8.70039	11.9658	1.99715	0.0737945	0	0.00265742		40.1337	0.0148998	0.0946961	0	0.000104999	12.8926	0.205873	46.2822	0.375742	0.000221772	8.19445e-06	0	2.95091e-07
	（a）	51.56	37.43	1900-2700	segment 27	2-A-MI6	MI in Pl-EMPA	50.1915	0.3437	15.8823		8.0886	0.2507	8.6877	11.8327	2.0788	0.0698		0.0283	65.6883		0	51.4553	0.352354	16.2822	0	0.921362	7.46303	0.257012	8.90644	12.1306	2.13114	0.0715575	0	0.0290126		40.2292	0.0117079	0.0938336	0	0.000102049	12.2847	0.323026	46.681	0.376113	0.000236042	7.9256e-06	0	3.21339e-06
	（a）	51.56	37.43	1900-2700	segment 27	2-A-MI7	MI in Pl-EMPA	48.7307	0.7504	16.3305		7.5989	0.2424	8.4636	12.2062	2.1286	0.1113		0.0781	66.5021		0	50.3806	0.775807	16.8834	0	0.872909	7.07056	0.250607	8.75016	12.6195	2.20067	0.115068	0	0.0807443		40.3232	0.02575	0.0959894	0	9.65765e-05	11.6991	0.322067	47.1351	0.398507	0.000243477	1.27309e-05	0	8.93335e-06
	（a）	51.56	37.43	1900-2700	segment 27	2-A-MI8	MI in Pl-EMPA	49.9476	0.321	16.244		8.1132	0.182	8.3312	12.0346	2.0122	0.0802		0.02	64.6684		0	51.2935	0.32965	16.6817	0	0.925757	7.49863	0.186904	8.55569	12.3589	2.06642	0.082361	0	0.0205389		40.1556	0.0109599	0.0947536	0	0.000102596	12.7469	0.24216	46.3563	0.393085	0.000229008	9.12756e-06	0	2.2762e-06
	（a）	51.56	37.43	1900-2700	segment 27	2-A-MI9	MI in Pl-EMPA	49.7498	0.3898	15.8828		8.1906	0.1648	8.4774	11.9142	1.995	0.0716		0.0028	64.8488		0	51.3256	0.402147	16.3859	0	0.938892	7.60503	0.17002	8.74592	12.2916	2.05819	0.0738679	0	0.00288869		40.1701	0.0133799	0.093963	0	0.000104127	12.6912	0.216273	46.4297	0.384981	0.000228261	8.19223e-06	0	3.20367e-07
	（a）	51.56	37.43	1900-2700	segment 27	2-E-2-MI3	MI in Pl-EMPA	50.35	0.98	14.84		8.4	0.13	7.8	11.65	2.49	0.13		0.08	62.3369		0	51.9376	1.0109	15.3079	0	0.962762	7.79837	0.134099	8.04594	12.0173	2.56851	0.134099	0	0.0825224		39.9649	0.0335639	0.0861205	0	0.000106552	13.747	0.180881	45.5912	0.395925	0.000284266	1.48412e-05	0	9.13304e-06
	（a）	51.56	37.43	1900-2700	segment 27	2-E-3-MI1	MI in Pl-EMPA	52.9238	0.4852	15.8105		8.5472	0.1188	8.6753	11.213	3.112	0.0694		0.0297	64.402		0	52.3584	0.480016	15.6416	0	0.939543	7.6103	0.117531	8.58262	11.0932	3.07875	0.0686586	0	0.0293827		40.1807	0.0158687	0.0882469	0	0.000103533	12.7266	0.151859	46.4845	0.351711	0.000339264	7.56584e-06	0	3.23783e-06
	（a）	51.56	37.43	1900-2700	segment 27	2-E-3-MI3	MI in Pl-EMPA	52.2209	0.398	15.8017		7.8384	0.2037	8.147	11.2117	3.1057	0.0876		0.0291	64.9444		0	52.6787	0.401489	15.9402	0	0.878569	7.11641	0.205486	8.21843	11.31	3.13293	0.088368	0	0.0293551		40.2184	0.0132577	0.0891905	0	9.6705e-05	12.3988	0.276846	46.631	0.372031	0.000344845	9.72676e-06	0	3.23115e-06
	（a）	51.56	37.43	1900-2700	segment 27	3-A-MI1	MI in Pl-EMPA	50.4152	0.5576	15.632		8.3656	0.232	8.5612	11.8228	3.1316	0.0392		0.0292	64.5906		0	50.9866	0.56392	15.8092	0	0.940046	7.61437	0.234629	8.65823	11.9568	3.16709	0.0396443	0	0.0295309		40.2059	0.0185445	0.0888331	0	0.000103045	12.4167	0.300562	46.593	0.376024	0.000347166	4.34567e-06	0	3.23708e-06
	（a）	51.56	37.43	1900-2700	segment 27	3-A-MI2	MI in Pl-EMPA	50.156	0.5576	15.7952		7.972	0.1456	8.5324	11.794	3.0836	0.0584		0.01	65.609		0	51.0788	0.567859	16.0858	0	0.902075	7.30681	0.148279	8.68938	12.011	3.14033	0.0594745	0	0.010184	67.9457	40.3083	0.0187194	0.090504	0	9.91228e-05	11.9693	0.190999	47.0421	0.379651	0.00034507	6.53524e-06	0	1.11905e-06
	（a）	51.56	37.43	1900-2700	segment 27	3-A-MI3	MI in Pl-EMPA	49.9492	0.5276	15.978		8.6026	0.181	8.4996	11.8672	3.0134	0.0482		0.0288	63.7825		0	50.5604	0.534056	16.1735	0	0.96754	7.83708	0.183215	8.6036	12.0124	3.05027	0.0487898	0	0.0291524		40.1459	0.0175645	0.090868	0	0.000106071	12.7981	0.234885	46.3343	0.378034	0.0003344	5.3488e-06	0	3.19596e-06
	（a）	51.56	37.43	1900-2700	segment 27	3-A-MI4	MI in Pl-EMPA	49.7525	0.628	15.7955		8.0065	0.135	8.322	11.992	2.844	0.058		0.029	64.9452		0	50.9491	0.643104	16.1754	0	0.911006	7.37915	0.138247	8.52215	12.2804	2.9124	0.0593949	0	0.0296975		40.2428	0.0212391	0.0908637	0	0.000100289	12.3082	0.180414	46.7634	0.392666	0.000320615	6.53856e-06	0	3.26928e-06
	（a）	51.56	37.43	1900-2700	segment 27	3-A-MI5	MI in Pl-EMPA	51.225	0.476	15.843		8.035	0.2395	8.721	11.669	2.4735	0.0675		0.0385	65.924		0	51.8066	0.481405	16.0229	0	0.902915	7.31361	0.242219	8.82002	11.8015	2.50159	0.0682664	0	0.0389372	68.2496	40.2653	0.0159676	0.0914958	0	9.98283e-05	12.0997	0.307812	46.8501	0.369139	0.000276581	7.54769e-06	0	4.30498e-06
	（a）	51.56	37.43	1900-2700	segment 27	3-A-MI6	MI in Pl-EMPA	50.706	0.3604	16.1032		8.4176	0.1136	8.5252	11.6376	2.982	0.0476		0.0376	64.3522		0	51.2056	0.363951	16.2619	0	0.944504	7.65048	0.114719	8.6092	11.7523	3.01138	0.048069	0	0.0379705		40.1973	0.0120031	0.091554	0	0.000103833	12.6369	0.147759	46.5426	0.371472	0.000331051	5.28439e-06	0	4.17422e-06
	（a）	51.56	37.43	1900-2700	segment 27	3-A-MI7	MI in Pl-EMPA	50.2322	0.7081	16.4923		8.2264	0.1176	8.3098	12.0899	2.997	0.0585		0.0776	64.2922		0	50.535	0.712368	16.5917	0	0.919554	7.44839	0.118309	8.35989	12.1628	3.01507	0.0588526	0	0.0780678		40.201	0.0234859	0.092771	0	0.000101055	12.5378	0.156477	46.5945	0.393436	0.000331344	6.46767e-06	0	8.57934e-06
	（a）	51.56	37.43	1900-2700	segment 27	3-B-MI1	MI in Pl-EMPA	49.7928	0.9904	16.1416		8.309	0.1476	8.2464	11.9894	2.4766	0.1384		0.1084	63.886		0	50.5855	1.00617	16.3986	0	0.93792	7.59715	0.14995	8.37768	12.1803	2.51603	0.140603	0	0.110126		40.1234	0.0333375	0.0923177	0	0.000103587	12.8687	0.197205	46.2923	0.392264	0.000277879	1.55288e-05	0	1.21627e-05
	（a）	51.56	37.43	1900-2700	segment 27	3-C-MI2	MI in Pl-EMPA	49.0065	1.0465	14.582		8.916	0.238	7.8565	11.264	3.0875	0.4275		0.0855	61.099		0	50.7266	1.08323	15.0938	0	1.02544	8.30605	0.246354	8.13226	11.6594	3.19587	0.442505	0	0.088501		39.9018	0.035525	0.0839109	0	0.000112099	13.952	0.325596	45.324	0.376692	0.000349366	4.83737e-05	0	9.67474e-06
	（a）	51.56	37.43	1900-2700	segment 27	4-A-MI1	MI in Pl-EMPA	51.108	0.919	15.436		7.111	0.18	8.246	11.863	2.396	0.117		0.1	67.3941		0	52.3889	0.942033	15.8229	0	0.809913	6.5603	0.184511	8.45267	12.1603	2.45605	0.119932	0	0.102506		40.387	0.031419	0.089521	0	9.00417e-05	11.4281	0.24647	47.4197	0.397351	0.00027305	1.33334e-05	0	1.13961e-05
	（a）	51.56	37.43	1900-2700	segment 27	4-A-MI2	MI in Pl-EMPA	50.659	1.356	15.457		6.835	0.237	8.146	12.202	2.243	0.109		0.099	67.993		0	52.0012	1.39193	15.8665	0	0.779565	6.31448	0.243279	8.36182	12.5253	2.30243	0.111888	0	0.101623		40.415	0.0465014	0.0898252	0	8.68123e-05	11.1171	0.329161	47.5881	0.414059	0.000256398	1.24598e-05	0	1.13167e-05
	（a）	51.56	37.43	1900-2700	segment 27	5-A-MI1	MI in Pl-EMPA	49.0515	0.576	15.1845		8.6385	0.2205	8.39	11.9795	2.607	0.126		0.062	63.3855		0	50.6043	0.594234	15.6652	0	0.990218	8.02077	0.22748	8.6556	12.3587	2.68953	0.129989	0	0.0639627		40.0834	0.019597	0.0887128	0	0.000108853	13.0702	0.288896	46.0627	0.385997	0.000295656	1.42895e-05	0	7.03132e-06
	（a）	51.56	37.43	1900-2700	segment 27	5-A-MI10	MI in Pl-EMPA	49.7508	0.3492	15.9972		7.8804	0.1344	8.1212	12.8468	2.4684	0.0672		0.0116	64.7503		0	50.9143	0.357367	16.3713	0	0.896078	7.25823	0.137543	8.31113	13.1472	2.52613	0.0687716	0	0.0118713		40.2182	0.0118303	0.0918784	0	9.88792e-05	12.4534	0.183303	46.6126	0.428357	0.00027875	7.58872e-06	0	1.30996e-06
	（a）	51.56	37.43	1900-2700	segment 27	5-A-MI11	MI in Pl-EMPA	49.3572	0.4737	15.867		8.5176	0.1479	8.1953	12.9224	2.577	0.0522		0.0461	63.1675		0	50.2358	0.482132	16.1494	0	0.963247	7.8023	0.150533	8.34118	13.1524	2.62287	0.0531292	0	0.0469206		40.0902	0.0159074	0.0904849	0	0.000105938	13.1116	0.197646	46.071	0.422744	0.000288463	5.84313e-06	0	5.16032e-06
	（a）	51.56	37.43	1900-2700	segment 27	5-A-MI13	MI in Pl-EMPA	49.8096	0.4215	15.1797		8.2653	0.1827	8.1866	12.7223	2.3247	0.0609		0.0026	63.8397		0	51.2193	0.433429	15.6093	0	0.944358	7.6493	0.187871	8.41829	13.0824	2.39049	0.0626236	0	0.00267358		40.1101	0.0143616	0.0880132	0	0.000104304	12.9756	0.245564	46.147	0.419068	0.000264029	6.91676e-06	0	2.95297e-07
	（a）	51.56	37.43	1900-2700	segment 27	5-A-MI2	MI in Pl-EMPA	49.839	0.489	14.994		8.703	0.153	8.219	12.671	2.493	0.054		0.002	62.7326		0	51.0051	0.500442	15.3448	0	0.989626	8.01597	0.15658	8.41131	12.9675	2.55133	0.0552635	0	0.0020468		40.0278	0.0165479	0.0864619	0	0.000109078	13.4552	0.203288	45.7975	0.412853	0.000281212	6.09124e-06	0	2.25601e-07
	（a）	51.56	37.43	1900-2700	segment 27	5-A-MI3	MI in Pl-EMPA	49.8357	0.4476	15.5625		8.1957	0.1827	8.1344	12.7397	2.2638	0.0522		0.0113	63.8872		0	51.1048	0.458998	15.9588	0	0.933823	7.56397	0.187353	8.34155	13.0641	2.32145	0.0535293	0	0.0115878		40.1113	0.0152169	0.0898568	0	0.000103195	12.9563	0.247027	46.1582	0.421705	0.000256539	5.91542e-06	0	1.28054e-06
	（a）	51.56	37.43	1900-2700	segment 27	5-A-MI4	MI in Pl-EMPA	50.175	0.3519	15.6843		8.5872	0.2001	8.1431	12.7658	2.1855	0.0696		0.0026	62.8288		0	51.0632	0.35813	15.962	0	0.971024	7.8653	0.203642	8.28726	12.9918	2.22419	0.0708321	0	0.00264603		40.0088	0.0118664	0.0898591	0	0.000107248	13.5	0.267882	45.7028	0.418488	0.000245657	7.82325e-06	0	2.92248e-07
	（a）	51.56	37.43	1900-2700	segment 27	5-A-MI5	MI in Pl-EMPA	50.436	0.3606	15.6582		8.709	0.2175	8.2562	12.7658	2.1855	0.0609		0.02	62.822		0	51.0659	0.365104	15.8538	0	0.979752	7.93599	0.220216	8.35931	12.9252	2.2128	0.0616606	0	0.0202498		40.0025	0.0120972	0.0894343	0	0.000108209	13.5181	0.287304	45.6769	0.41336	0.000244394	6.81014e-06	0	2.2365e-06
	（a）	51.56	37.43	1900-2700	segment 27	5-A-MI6	MI in Pl-EMPA	50.1054	0.4476	15.7278		8.4915	0.1653	8.4302	12.7571	2.0028	0.1566		0.0026	63.8933		0	50.9298	0.454965	15.9866	0	0.959024	7.7681	0.16802	8.56891	12.967	2.03575	0.159177	0	0.00264278		40.102	0.0151175	0.0909765	0	0.000106221	13.0403	0.216247	46.1249	0.410059	0.000225479	1.76303e-05	0	2.92713e-07
	（a）	51.56	37.43	1900-2700	segment 27	5-A-MI7	MI in Pl-EMPA	49.146	0.51	16.11		8.086	0.168	8.376	12.844	2.164	0.096		0.068	64.8674		0	50.3247	0.522231	16.4964	0	0.919992	7.45194	0.172029	8.57688	13.152	2.2159	0.0983024	0	0.0696309		40.2095	0.0173163	0.0933668	0	0.000101684	12.4374	0.222833	46.6011	0.418063	0.000244918	1.08651e-05	0	7.69612e-06
	（a）	51.56	37.43	1900-2700	segment 27	5-A-MI8	MI in Pl-EMPA	50.377	0.3445	15.9305		8.209	0.1275	8.3855	12.7145	2.1215	0.0595		0.02	64.5486		0	51.2062	0.35017	16.1927	0	0.927124	7.5097	0.129599	8.52352	12.9238	2.15642	0.0604793	0	0.0203292		40.1683	0.0116412	0.091846	0	0.000102738	12.7451	0.168515	46.4019	0.412309	0.000238962	6.70197e-06	0	2.25276e-06
	（a）	51.56	37.43	1900-2700	segment 27	5-A-MI9	MI in Pl-EMPA	50.088	0.3445	16.0495		8.4215	0.2465	8.1815	12.8505	2.5295	0.068		0.02	63.3919		0	50.6486	0.348356	16.2291	0	0.946196	7.66419	0.249259	8.27308	12.9943	2.55781	0.0687611	0	0.0202239		40.0819	0.0114893	0.0907851	0	0.000104024	13.0467	0.329629	46.0188	0.420302	0.000281203	7.55951e-06	0	2.22338e-06
	（a）	51.56	37.43	1900-2700	segment 27	5-B-1-MI1	MI in Pl-EMPA	50.5588	0.7616	16.264		8.4976	0.1584	8.4292	12.1264	2.2308	0.1332		0.0716	63.874		0	50.9019	0.766768	16.3744	0	0.950585	7.69973	0.159475	8.4864	12.2087	2.24594	0.134104	0	0.0720858		40.1011	0.0254626	0.092772	0	0.000105223	13.0143	0.20715	46.1697	0.389091	0.000248608	1.48443e-05	0	7.97936e-06
	（a）	51.56	37.43	1900-2700	segment 27	5-B-1-MI1	MI in Pl-EMPA	50.1628	0.8408	16.1496		8.48	0.1848	8.218	12.1352	2.31	0.1244		0.0628	63.3346		0	50.7913	0.851334	16.3519	0	0.954027	7.72762	0.187115	8.32096	12.2872	2.33894	0.125959	0	0.0635868		40.0554	0.0282239	0.0920977	0	0.000105428	13.2045	0.246367	45.9768	0.396139	0.000258473	1.39195e-05	0	7.02689e-06
	（a）	51.56	37.43	1900-2700	segment 27	5-B-1-MI2	MI in Pl-EMPA	49.8964	0.7316	16.0536		8.538	0.044	8.1	12.1388	2.2372	0.054		0.0564	62.8391		0	50.9434	0.746951	16.3904	0	0.968572	7.84543	0.0449232	8.26996	12.3935	2.28414	0.0551331	0	0.0575834		40.031	0.0248289	0.0925271	0	0.000107319	13.5299	0.0594049	45.8608	0.401214	0.000253086	6.10882e-06	0	6.38032e-06
	（a）	51.56	37.43	1900-2700	segment 27	5-B-1-MI2	MI in Pl-EMPA	50.1868	0.6172	15.8336		8.2916	0.1672	8.364	12.1564	2.5628	0.0628		0.03	64.2602		0	51.0212	0.627462	16.0969	0	0.936607	7.58652	0.16998	8.50307	12.3585	2.60541	0.0638442	0	0.0304988		40.1571	0.0207644	0.0907528	0	0.000103316	12.7271	0.221003	46.3889	0.393996	0.0002874	7.04258e-06	0	3.36429e-06
	（a）	51.56	37.43	1900-2700	segment 27	5-B-1-MI3	MI in Pl-EMPA	50.4312	0.67	15.9856		8.9056	0.1408	8.472	12.0376	2.5264	0.0616		0.0616	62.9032		0	50.74	0.674103	16.0835	0	0.995571	8.06412	0.141662	8.52388	12.1113	2.54187	0.0619772	0	0.0619772		40.0373	0.0223008	0.0910183	0	0.000109785	13.4039	0.182041	45.8808	0.38224	0.000280302	6.83447e-06	0	6.83447e-06
	（a）	51.56	37.43	1900-2700	segment 27	5-B-2-MI1	MI in Pl-EMPA	49.6182	0.751	16.3456		8.0026	0.086	8.595	12.7422	2.5018	0.0616		0.0644	65.6874		0	50.1917	0.759681	16.5345	0	0.899456	7.28559	0.0869941	8.69435	12.8895	2.53072	0.062312	0	0.0651444	68.0214	40.3087	0.0251779	0.0936876	0	9.9368e-05	11.9866	0.112158	47.0652	0.408049	0.000279583	6.88397e-06	0	7.19687e-06
	（a）	51.56	37.43	1900-2700	segment 27	5-B-2-MI5	MI in Pl-EMPA	49.9832	0.8228	16.7732		7.9744	0.1972	8.3996	12.6424	2.1036	0.0836		0.03	65.2473		0	50.4378	0.830284	16.9258	0	0.894104	7.24224	0.198994	8.476	12.7574	2.12273	0.0843604	0	0.0302729		40.2192	0.0275848	0.0956557	0	9.90171e-05	12.2989	0.261156	46.687	0.410239	0.000235081	9.34246e-06	0	3.35256e-06
	（a）	51.56	37.43	1900-2700	segment 27	5-B-3-MI6	MI in Pl-EMPA	49.275	0.4528	16.7756		7.392	0.133	8.6086	13.4204	2.3112	0.0164		0.0428	67.4881		0	50.0203	0.459649	17.0293	0	0.833757	6.75343	0.135012	8.73881	13.6234	2.34616	0.0166481	0	0.0434474		40.4561	0.0152463	0.0963634	0	9.21843e-05	11.1587	0.175216	47.6643	0.433773	0.000259403	1.84069e-06	0	4.80376e-06
	（a）	51.56	37.43	1900-2700	segment 27	5-E-MI1	MI in Pl-EMPA	49.75	0.5424	17.3712		7.9564	0.1376	8.6724	13.2644	2.544	0.0252		0.0436	66.0192		0	49.554	0.540263	17.3027	0	0.880561	7.13254	0.137058	8.63823	13.2121	2.53398	0.0251007	0	0.0434282		40.3461	0.017854	0.0974088	0	9.69994e-05	11.7357	0.177999	47.2038	0.420722	0.000279134	2.765e-06	0	4.78389e-06
	(a)	51.56	37.43	1900-2700	segment 27	5-F-MI2	MI in Pl-EMPA	48.6652	0.8182	15.8816		8.8038	0.1376	7.9844	12.2998	2.8262	0.0344		0.0602	61.7816		0	49.8572	0.83824	16.2706	0	1.00216	8.11749	0.14097	8.17996	12.6011	2.89542	0.0352426	0	0.0616745		39.978	0.0275713	0.0907324	0	0.000109876	13.6766	0.18657	45.6324	0.407744	0.000317453	3.86398e-06	0	6.76196e-06
	This study	49.6647	37.8112	2398	WR-28	DY30II-1	basaltic glass-XRF	49.08	1.159	18.68	0	8.71018	0.147	6.02	12.14	2.67	0.13		0.102	55.1956		0	49.6083	1.17148	18.8811	0	0.978216	7.92355	0.148582	6.08481	12.2707	2.69874	0.131399	0	0.103098		39.3309	0.0383211	0.124729	0	0.000106664	16.8602	0.244497	42.9079	0.492987	0.000294269	1.43277e-05	0	1.12417e-05
	This study	49.6872	37.7386	2946	WR-28	30IV-TVG04	basaltic glass-XRF	49.2	1.224	18.17	0	8.94413	0.152	6.17	11.98	2.68	0.2	0	0.105	55.1487		0	49.7349	1.23731	18.3675	0	1.0046	8.13723	0.153653	6.23708	12.1102	2.70914	0.202174	0	0.106142		39.3233	0.0404978	0.117243	0	0.000109603	16.924	0.24698	42.873	0.474501	0.000295572	2.20576e-05	0	1.15802e-05
	This study	49.6647	37.8112	2398	Segment 28-MI-OL	DY30IV-1	MI in Ol-EMPA	49.956	0.676	16.114	0.036	8.00055	0.134	8.711	13.744	2.335	0.039	0	0.176	65.9947		0	49.9508	0.675929	16.1123	0.0359962	0.888857	7.19974	0.133986	8.71009	13.7426	2.33476	0.0389959	0	0.175982		40.317	0.0224216	0.0914329	0.0203325	9.82826e-05	11.8268	0.172618	47.1141	0.434845	0.000258158	4.31185e-06	0	1.94586e-05
	This study	49.6872	37.7386	2946	Segment 28	282	MI in Pl-EMPA	49.1515	0.89986	16.3161	0.068815	7.605	0.21895	9.44243	14.2209	2.04789	0.0191	0.01812	0	68.8773		0	49.1057	0.899022	16.3009	0.0687509	0.844213	6.83813	0.218746	9.43364	14.2077	2.04598	0.0190822	0.0181031	0		40.491	0.0297636	0.0956804	0.0372593	9.31636e-05	10.4736	0.266034	47.9439	0.428804	0.000225785	2.10583e-06	0.233651	0
	(b)	49.6561	37.7889		Segment 28	Dy115-D13	glass-XRF	50.03	0.965	18.17		7.4865	0.17	6.84	12.435	2.475	0.285		0.1	61.9557		0	50.5151	0.974357	18.3462	0	0.839899	6.80318	0.171648	6.90632	12.5556	2.499	0.287763	0	0.10097		39.9609	0.0321797	0.111365	0	9.24634e-05	13.562	0.265539	45.5951	0.472455	0.000275111	3.16795e-05	0	1.11156e-05
	This study	63.9358	27.849	2958	Mountain Jourdanne	30I-2-1-25MI	MI in Ol-EMPA	51.56	1.28	15.963	0.01	8.00352	0.105	7.358	11.492	3.945	0.191	0	0	62.1022		0	51.5618	1.28005	15.9636	0.0100004	0.889312	7.20343	0.105004	7.35826	11.4924	3.94514	0.191007	0	0		40.046	0.0419151	0.0919649	0.00617989	9.70685e-05	13.2583	0.15379	45.9921	0.409185	0.000430613	2.08484e-05	0	0
	This study	63.9358	27.849	2958	Mountain Jourdanne	30I-2-1-3MI	MI in Ol-EMPA	51.209	1.106	15.922	0.02	8.00772	0.165	7.57	11.592	3.957	0.193	0	0.165	62.7561		0	51.2112	1.10605	15.9227	0.0200009	0.889785	7.20726	0.165007	7.57033	11.5925	3.95717	0.193008	0	0.165007	62.7566	40.096	0.0361695	0.0902639	0.0121517	9.69913e-05	12.9285	0.236296	46.1964	0.403691	0.000431353	2.10389e-05	0	1.79866e-05
	This study	63.9358	27.849	2958	Mountain Jourdanne	30I-2-1-6MI	MI in Ol-EMPA	51.073	1.17	16.416	0.035	8.04932	0.156	7.295	11.228	4.104	0.212	0	0.169	61.7649		0	51.0747	1.17004	16.4165	0.0350011	0.894398	7.24463	0.156005	7.29524	11.2284	4.10413	0.212007	0	0.169005		40.0137	0.0381664	0.0948473	0.0216797	9.72502e-05	13.3245	0.229505	45.8754	0.401558	0.000446253	2.30521e-05	0	1.83764e-05
	This study	63.9358	27.849	2958	Mountain Jourdanne	30I-2-1-8MI	MI in Ol-EMPA	51.324	1.177	15.807	0.031	8.00503	0.128	7.638	11.578	3.878	0.175	0	0.167	62.9727		0	51.3256	1.17704	15.8075	0.0310009	0.889474	7.20474	0.128004	7.63823	11.5784	3.87812	0.175005	0	0.167005	62.9732	40.1101	0.0385745	0.0893811	0.018763	9.71679e-05	12.8809	0.182217	46.2786	0.40089	0.000423653	1.91179e-05	0	1.8244e-05
	This study	63.9358	27.849	2958	Mountain Jourdanne	30I-2-1-9MI	MI in Ol-EMPA	51.212	1.057	16.177	0.026	8.00353	0.117	7.542	11.293	3.98	0.25	0	0.248	62.6817		0	51.2148	1.05706	16.1779	0.0260014	0.88933	7.20357	0.117006	7.54242	11.2936	3.98022	0.250014	0	0.248014	62.6822	40.0996	0.0345835	0.0919522	0.0158449	9.69865e-05	12.9735	0.168214	46.2209	0.394794	0.000434066	2.72654e-05	0	2.70473e-05
	This study	63.9358	27.849	2958	Mountain Jourdanne	30I-2-1-10MI	MI in Ol-EMPA	51.573	1.018	16.572	0.027	8.04762	0.126	6.932	10.883	4.165	0.308	0	0.255	60.5576		0	51.575	1.01804	16.5727	0.0270011	0.894216	7.24315	0.126005	6.93227	10.8834	4.16516	0.308012	0	0.25501		39.9172	0.0331782	0.0994409	0.017209	9.71426e-05	13.895	0.192651	45.44	0.404767	0.00045248	3.34607e-05	0	2.77029e-05
	This study	63.9358	27.849	2958	Mountain Jourdanne	30I-2-1-11-2MI	MI in Ol-EMPA	51.24	1.038	16.178	0.027	8.04602	0.184	7.31	11.242	4.126	0.202	0	0.314	61.8231		0	51.2418	1.03804	16.1786	0.027001	0.894035	7.24168	0.184007	7.31026	11.2424	4.12615	0.202007	0	0.314011		40.0168	0.0338533	0.0933104	0.0166982	9.71899e-05	13.3075	0.270149	45.8599	0.401242	0.000448551	2.19601e-05	0	3.4136e-05
	This study	63.9358	27.849	2958	Mountain Jourdanne	30I-2-1-12MI	MI in Ol-EMPA	50.926	0.96	16.091	0.049	8.01723	0.154	7.467	12.005	3.835	0.192	0	0.213	62.4075		0	50.9269	0.960016	16.0913	0.0490008	0.890818	7.21563	0.154003	7.46713	12.0052	3.83506	0.192003	0	0.213004	62.408	40.0611	0.0313917	0.0918103	0.0299888	9.70967e-05	13.0815	0.222731	46.0587	0.422141	0.000418011	2.09278e-05	0	2.32168e-05
	This study	63.9358	27.849	2958	Mountain Jourdanne	30I-2-1-13MI	MI in Ol-EMPA	51.212	1.159	16.336	0.046	8.00803	0.112	7.441	11.048	4.095	0.217	0	0.234	62.3526		0	51.2135	1.15903	16.3365	0.0460014	0.889807	7.20744	0.112003	7.44122	11.0483	4.09512	0.217007	0	0.234007	62.3531	40.0674	0.0378821	0.0934717	0.028236	9.69422e-05	13.0982	0.16266	46.1215	0.390081	0.000446153	2.36423e-05	0	2.54944e-05
	This study	63.9358	27.849	2958	Mountain Jourdanne	30I-2-1-14-1MI	MI in Ol-EMPA	51.095	0.992	16.489	0.023	8.03303	0.189	7.567	10.955	4.148	0.26	0	0.157	62.6731		0	51.0964	0.992027	16.4894	0.0230006	0.892583	7.22992	0.189005	7.56721	10.9553	4.14811	0.260007	0	0.157004	62.6736	40.0957	0.032337	0.0933407	0.0139582	9.69847e-05	12.9134	0.27055	46.1988	0.38132	0.000450719	2.82514e-05	0	1.70595e-05
	This study	63.9358	27.849	2958	Mountain Jourdanne	30I-2-1-14-2MI	MI in Ol-EMPA	51.217	1.071	16.382	0.015	8.00223	0.153	7.558	10.899	4.153	0.213	0	0.245	62.7351		0	51.2185	1.07103	16.3825	0.0150004	0.889162	7.20221	0.153004	7.55822	10.8993	4.15312	0.213006	0	0.245007	62.7356	40.1058	0.0349681	0.0929267	0.00912265	9.67675e-05	12.9138	0.219527	46.2431	0.380249	0.000451984	2.31815e-05	0	2.66641e-05
	This study	63.9358	27.849	2958	Mountain Jourdanne	30I-2-1-14-3MI	MI in Ol-EMPA	51.242	1.116	16.081	0.008	8.01202	0.185	7.554	11.23	4.076	0.241	0	0.162	62.6941		0	51.244	1.11604	16.0816	0.00800032	0.89026	7.21111	0.185007	7.5543	11.2304	4.07616	0.24101	0	0.162006	62.6946	40.0959	0.0364394	0.0911888	0.0048635	9.68915e-05	12.925	0.265295	46.1891	0.391585	0.000443629	2.62303e-05	0	1.7632e-05
	This study	63.9358	27.849	2958	Mountain Jourdanne	30I-2-1-15MI	MI in Ol-EMPA	51.343	0.984	16.278	0.009	8.00533	0.131	7.461	11.362	3.983	0.209	0	0.144	62.4235		0	51.3439	0.984017	16.2783	0.00900016	0.889496	7.20492	0.131002	7.46113	11.3622	3.98307	0.209004	0	0.144002	62.424	40.0793	0.0321697	0.0929851	0.00551495	9.69322e-05	13.0946	0.189797	46.1049	0.400217	0.000434052	2.2776e-05	0	1.56926e-05
	This study	63.9358	27.849	2958	Mountain Jourdanne	30I-2-1-18MI	MI in Ol-EMPA	51.275	1.057	16.372	0.034	8.00733	0.129	7.396	11.173	3.999	0.219	0	0.248	62.2122		0	51.2759	1.05702	16.3723	0.0340006	0.889718	7.20672	0.129002	7.39613	11.1732	3.99907	0.219004	0	0.248004		40.0519	0.0345574	0.0939698	0.020935	9.69593e-05	13.1865	0.188118	46.0273	0.396098	0.000435809	2.38665e-05	0	2.70269e-05
	This study	63.9358	27.849	2958	Mountain Jourdanne	30I-2-1-19MI	MI in Ol-EMPA	51.504	1.093	16.281	0.046	8.00853	0.144	7.505	10.873	4.094	0.207	0	0.152	62.552		0	51.5058	1.09304	16.2816	0.0460016	0.889867	7.20793	0.144005	7.50526	10.8734	4.09414	0.207007	0	0.152005	62.5525	40.0742	0.0357191	0.0926911	0.0280875	9.69324e-05	13.0357	0.207661	46.1441	0.381235	0.000445971	2.25491e-05	0	1.65578e-05
	This study	63.9358	27.849	2958	Mountain Jourdanne	30I-2-1-20MI	MI in Ol-EMPA	51.522	0.992	16.502	0.044	8.00423	0.091	7.532	10.661	4.153	0.231	0	0.175	62.6486		0	51.524	0.992038	16.5026	0.0440017	0.889393	7.20408	0.0910035	7.53229	10.6614	4.15316	0.231009	0	0.175007	62.6491	40.0991	0.0324234	0.0938652	0.0268394	9.68952e-05	12.9985	0.131045	46.2444	0.373284	0.000452467	2.51673e-05	0	1.90662e-05
	This study	63.9358	27.849	2958	Mountain Jourdanne	30I-2-1-22MI	MI in Ol-EMPA	51.201	0.954	16.374	0.01	8.00453	0.126	7.365	11.374	4.087	0.241	0	0.172	62.1216		0	51.2023	0.954024	16.3744	0.0100003	0.889414	7.20426	0.126003	7.36519	11.3743	4.0871	0.241006	0	0.172004		40.064	0.0311378	0.0941922	0.00617004	9.67636e-05	13.1777	0.184361	46.0373	0.404569	0.000444655	2.62202e-05	0	1.87132e-05
	This study	63.9358	27.849	2958	Mountain Jourdanne	30I-2-1-23MI	MI in Ol-EMPA	51.551	1.018	16.212	0.054	8.00693	0.135	7.396	10.903	4.168	0.203	0	0.26	62.2133		0	51.5531	1.01804	16.2127	0.0540022	0.889695	7.20653	0.135006	7.3963	10.9034	4.16817	0.203008	0	0.260011	62.2138	40.0495	0.0332444	0.0930211	0.033238	9.68439e-05	13.1705	0.196853	46.0366	0.386495	0.000453708	2.20976e-05	0	2.83023e-05
	This study	63.9358	27.849	2958	Mountain Jourdanne	30I-2-1-24MI	MI in Ol-EMPA	51.32	1.234	16.342	0.067	8.00553	0.13	7.396	11.041	4.001	0.243	0	0.127	62.2175		0	51.3223	1.23406	16.3427	0.067003	0.889543	7.2053	0.130006	7.39633	11.0415	4.00118	0.243011	0	0.127006	62.2179	40.0376	0.0403537	0.0937996	0.0412552	9.69603e-05	13.1798	0.189567	46.0256	0.391401	0.000436129	2.64882e-05	0	1.38436e-05
	This study	63.9358	27.849	2958	Mountain Jourdanne	30I-TVG02-1	basaltic glass-XRF	51.02	0.988	19.62		5.94776	0.108	5.58	11.09	3.78	0.2		0.118	62.578		0	51.7876	1.00286	19.9152	0	0.670804	5.43351	0.109625	5.66395	11.2568	3.83687	0.203009	0	0.119775	65.0108	40.0815	0.0327908	0.16538	0	7.31113e-05	12.7719	0.205438	46.2203	0.522044	0.000418182	2.2126e-05	0	1.30544e-05
	This study (No. 215)	63.9358	27.849	2958	Mountain Jourdanne	30I-2-1-4-1	glass-EMPA data	50.814	1.393	15.826		8.134	0.174	6.713	10.863	4.222	0.223			59.5313		0	51.6128	1.4149	16.0748	0	0.917985	7.43568	0.176735	6.81853	11.0338	4.28837	0.226505	0	0		39.8194	0.0460061	0.0971734	0	9.94958e-05	14.3314	0.271896	45.0205	0.41303	0.000464795	2.45498e-05	0	0
	This study (No. 217)	63.9358	27.849	2958	Mountain Jourdanne	30I-2-1-5	glass-EMPAdata	50.927	1.393	15.688		8.205	0.155	6.758	11.023	4.177	0.275			59.4829		0	51.6019	1.41146	15.8959	0	0.923748	7.48236	0.157054	6.84755	11.1691	4.23235	0.278644	0	0		39.8189	0.0459287	0.0956426	0	0.000100195	14.3679	0.240665	45.014	0.416378	0.000459067	3.02235e-05	0	0
	This study (No. 218)	63.9358	27.849	2958	Mountain Jourdanne	30I-2-1-6	glass-EMPAdata	50.94	1.416	15.785		8.238	0.138	6.859	11.043	4.143	0.246			59.7434		0	51.5068	1.43176	15.9606	0	0.925518	7.4967	0.139536	6.93532	11.1659	4.1891	0.248737	0	0		39.8429	0.0466376	0.0950325	0	0.000100492	14.2697	0.211831	45.1211	0.412261	0.000454849	2.70077e-05	0	0
	This study (No. 221)	63.9358	27.849	2958	Mountain Jourdanne	30I-2-1-9	glass-EMPAdata	50.739	1.409	15.698		8.216	0.175	6.821	10.848	4.363	0.226			59.6741		0	51.4666	1.4292	15.9231	0	0.92598	7.50043	0.177509	6.91881	11.0036	4.42556	0.229241	0	0		39.8423	0.0464094	0.0949453	0	0.000100229	14.2208	0.269769	45.1185	0.40675	0.000479026	2.48132e-05	0	0
	This study (No. 232)	63.9358	27.849	2958	Mountain Jourdanne	30I-2-1-14	glass-EMPAdata	51.254	1.42	15.806		8.321	0.126	7.088	10.545	4.36	0.246			60.2909		0	51.6369	1.43061	15.9241	0	0.931463	7.54485	0.126941	7.14095	10.6238	4.39257	0.247838	0	0		39.9016	0.0465682	0.0927436	0	0.000101068	14.0053	0.188504	45.3812	0.383533	0.000476613	2.68915e-05	0	0
	This study (No. 256)	63.9358	27.849	2958	Mountain Jourdanne	30I-2-1-23	glass-EMPAdata	51.301	1.384	15.718		8.116	0.181	6.929	10.895	4.197	0.273			60.345		0	51.7752	1.39679	15.8633	0	0.910113	7.37191	0.182673	6.99304	10.9957	4.23579	0.275523	0	0		39.889	0.0454892	0.0940833	0	9.87985e-05	13.9733	0.276294	45.3167	0.404443	0.000459822	2.99098e-05	0	0
	This study	63.9358	27.849	2958	Mountain Jourdanne	30I-2-1-1MI	MI in Pl-EMPA	51.6978	1.33682	16.7895		7.5205	0.10901	6.61494	10.8075	3.40298	0.23864			61.0563		0	52.4311	1.35578	17.0277	0	0.847465	6.86447	0.110556	6.70878	10.9609	3.45126	0.242025	0	0		39.9076	0.0446284	0.106194	0	9.29871e-05	13.9275	0.174874	45.4165	0.422128	0.000378685	2.65559e-05	0	0
	This study	63.9358	27.849	2958	Mountain Jourdanne	30I-2-1-2MI	MI in Pl-EMPA	51.0463	1.36411	16.7362		7.5084	0.163427	6.55861	10.5763	4.04288	0.249208			60.8911		0	51.9139	1.38729	17.0206	0	0.848445	6.8724	0.166204	6.67007	10.756	4.11159	0.253443	0	0		39.9312	0.0452617	0.10694	0	9.22709e-05	13.7134	0.26385	45.5228	0.416006	0.000447148	2.75627e-05	0	0
	This study	63.9358	27.849	2958	Mountain Jourdanne	30I-2-1-2MI-2	MI in Pl-EMPA	51.4126	1.19759	16.6681		7.47679	0.1368	6.53155	10.8338	3.99381	0.23896			60.8931		0	52.1568	1.21493	16.9094	0	0.84278	6.82652	0.13878	6.6261	10.9907	4.05162	0.242419	0	0		39.9363	0.0396781	0.107149	0	9.17474e-05	13.7447	0.221761	45.5218	0.428005	0.000441071	2.63904e-05	0	0
	This study	63.9358	27.849	2958	Mountain Jourdanne	30I-2-1-3 mi-1	MI in Pl-EMPA	51.1618	1.40091	16.4191		7.8181	0.166104	6.25738	10.8794	4.35009	0.275686			58.7902		0	51.7751	1.4177	16.616	0	0.879091	7.12064	0.168095	6.33238	11.0098	4.40224	0.278991	0	0		39.762	0.0459905	0.10951	0	9.50596e-05	14.5776	0.275393	44.7884	0.44052	0.000476031	3.01684e-05	0	0
	This study	63.9358	27.849	2958	Mountain Jourdanne	30I-2-1-3 mi-2	MI in Pl-EMPA	51.2222	1.3001	16.7699		7.80885	0.1449	6.57418	10.7318	4.22793	0.259352			60.0098		0	51.6738	1.31157	16.9178	0	0.875301	7.08994	0.146178	6.63215	10.8264	4.26521	0.261639	0	0		39.8709	0.0426715	0.106235	0	9.49255e-05	14.0793	0.231796	45.2502	0.418295	0.000462557	2.83745e-05	0	0
	This study	63.9358	27.849	2958	Mountain Jourdanne	30I-2-1-11mi	MI in Pl-EMPA	50.7194	1.15883	17.3015		7.31385	0.13737	7.03142	10.8684	4.22874	0.19761			63.1487		0	51.2119	1.17008	17.4695	0	0.820541	6.64638	0.138704	7.09969	10.9739	4.2698	0.199529	0	0		40.1584	0.0381538	0.10455	0	8.91866e-05	12.5986	0.211581	46.481	0.407163	0.000464095	2.16873e-05	0	0
	This study	63.9358	27.849	2958	Mountain Jourdanne	30I-2-1-12MI	MI in Pl-EMPA	51.3781	1.2751	16.6578		7.36553	0.136806	6.51148	10.962	4.18866	0.219918			61.1765		0	52.0141	1.29089	16.864	0	0.828523	6.71104	0.1385	6.59209	11.0977	4.24052	0.22264	0	0		39.9748	0.0420916	0.108001	0	9.00516e-05	13.5197	0.222902	45.6964	0.435509	0.000460899	2.41986e-05	0	0
	This study	63.9358	27.849	2958	Mountain Jourdanne	30I-2-1-13MI-1	MI in Pl-EMPA	51.3236	1.25573	16.8873		7.44416	0.143122	6.72008	10.8741	4.21514	0.215348			61.672		0	51.7577	1.26635	17.0301	0	0.834125	6.75641	0.144333	6.77692	10.9661	4.25079	0.217169	0	0		40.0198	0.0412862	0.105879	0	9.06487e-05	13.2952	0.227266	45.8895	0.420519	0.000461956	2.36009e-05	0	0
	This study	63.9358	27.849	2958	Mountain Jourdanne	30I-2-1-13MI-2	MI in Pl-EMPA	51.0904	1.22823	16.8439		7.37783	0.109368	6.65098	11.0946	4.10901	0.255016			61.6393		0	51.6894	1.24263	17.0413	0	0.829369	6.71789	0.11065	6.72895	11.2246	4.15718	0.258006	0	0		40.0239	0.040558	0.106885	0	9.0232e-05	13.3161	0.175446	45.903	0.433571	0.000452284	2.807e-05	0	0
	This study	63.9358	27.849	2958	Mountain Jourdanne	30I-2-1-13MI-3	MI in Pl-EMPA	51.0783	1.20265	16.8547		7.34905	0.173112	6.64695	10.9476	4.33099	0.224096			61.7174		0	51.6521	1.21616	17.044	0	0.825733	6.68844	0.175057	6.72162	11.0706	4.37964	0.226613	0	0		40.0286	0.0395593	0.107079	0	8.95318e-05	13.1982	0.277673	45.9204	0.42787	0.000474871	2.4571e-05	0	0
	This study	63.9358	27.849	2958	Mountain Jourdanne	30I-2-1-13MI-4	MI in Pl-EMPA	50.9043	1.28125	16.9091		7.44483	0.13465	6.73615	10.9369	4.18145	0.2318			61.7264		0	51.5001	1.29625	17.107	0	0.836885	6.77876	0.136226	6.81499	11.0649	4.23039	0.234513	0	0		40.0288	0.0422584	0.105735	0	9.09431e-05	13.2555	0.213521	45.9313	0.422276	0.000459711	2.54842e-05	0	0
	This study	63.9358	27.849	2958	Mountain Jourdanne	30I-2-1-16mi-1	MI in Pl-EMPA	51.8564	1.1278	16.877		7.14586	0.120782	6.68414	10.8218	4.16616	0.227074			62.5084		0	52.3239	1.13797	17.0292	0	0.801144	6.48926	0.121871	6.74441	10.9194	4.20373	0.229121	0	0	64.9433	40.0932	0.0371891	0.107371	0	8.72715e-05	12.9486	0.194061	46.1954	0.423644	0.000457928	2.4959e-05	0	0
	This study	63.9358	27.849	2958	Mountain Jourdanne	30I-2-1-16mi-2	MI in Pl-EMPA	51.334	1.1656	17.107		7.2736	0.17404	6.89031	11.2283	4.19968	0.249588			62.8047		0	51.487	1.16907	17.158	0	0.810586	6.56575	0.174559	6.91085	11.2617	4.2122	0.250332	0	0	65.231	40.1188	0.0381143	0.105294	0	8.80897e-05	12.735	0.272048	46.3029	0.427234	0.000457757	2.72046e-05	0	0
	This study	63.9358	27.849	2958	Mountain Jourdanne	30I-2-1-16mi-3	MI in Pl-EMPA	51.4208	1.17328	17.0529		7.35644	0.16744	6.85412	10.7852	4.25712	0.2202			62.4163		0	51.5532	1.1763	17.0968	0	0.810257	6.56308	0.174488	6.90804	11.2572	4.21049	0.25023	0	0	65.231	40.1178	0.0383572	0.104962	0	8.80706e-05	12.7403	0.272038	46.2987	0.427222	0.000457658	2.71987e-05	0	0
	This study	63.9358	27.849	2958	Mountain Jourdanne	30I-2-1-16mi-4	MI in Pl-EMPA	51.6803	1.19043	16.8916		7.13558	0.117632	6.71365	10.057	4.45271	0.261345			62.6453		0	51.7535	1.19211	16.9155	0	0.809322	6.55551	0.174286	6.90007	11.2442	4.20563	0.249941	0	0	65.231	40.115	0.0388941	0.103971	0	8.8017e-05	12.756	0.27201	46.2863	0.427187	0.000457379	2.71821e-05	0	0
	This study	63.9358	27.849	2958	Mountain Jourdanne	30I-2-1-17MI	MI in Pl-EMPA	51.4383	1.43669	16.9943		7.33512	0.169392	6.81241	11.0902	4.23066	0.229928			62.3411		0	51.5318	1.4393	17.0252	0	0.816496	6.61361	0.1697	6.8248	11.1103	4.23836	0.230346	0	0	64.7807	40.0729	0.0469444	0.105571	0	8.87697e-05	12.9454	0.266691	46.1368	0.425174	0.000460796	2.50433e-05	0	0
	This study	63.9358	27.849	2958	Mountain Jourdanne	30I-2-1-22MI	MI in Pl-EMPA	51.0606	1.2166	16.6829		7.9988	0.1691	6.54235	11.1666	4.37255	0.2129			59.3146		0	51.3113	1.22257	16.7649	0	0.89312	7.23427	0.16993	6.57447	11.2215	4.39402	0.213945	0	0		39.8177	0.0396376	0.105687	0	9.65208e-05	14.3307	0.269983	45.0011	0.434533	0.000474868	2.31214e-05	0	0
	This study	63.9358	27.849	2958	Mountain Jourdanne	30I-2-1-1	MI in Pl-EMPA	51.2316	1.03197	16.6849		6.94676	0.136628	6.52796	10.4234	4.02976	0.278744		0.149954	62.6165		0	52.535	1.05823	17.1094	0	0.7915	6.41115	0.140104	6.69404	10.6886	4.13229	0.285836	0	0.153769	65.0482	40.0935	0.0346133	0.108935	0	8.62964e-05	12.9271	0.224747	46.1926	0.41792	0.000450539	3.11644e-05	0	1.67653e-05
	This study	63.9358	27.849	2958	Mountain Jourdanne	30I-2-1-2	MI in Pl-EMPA	51.2514	1.067	16.6315		7.13753	0.13717	6.51096	10.3241	4.28743	0.269744		0.182578	61.9188		0	52.3621	1.09013	16.9919	0	0.810246	6.56299	0.140143	6.65206	10.5479	4.38035	0.27559	0	0.186535	64.3701	40.0472	0.0355434	0.108446	0	8.80596e-05	13.1745	0.224993	45.9958	0.412854	0.000476068	2.99518e-05	0	2.02731e-05
	This study	63.9358	27.849	2958	Mountain Jourdanne	30I-2-1-3	MI in Pl-EMPA	51.0782	1.0776	16.6034		7.52875	0.15145	6.4414	10.0347	4.47605	0.282		0.2071	60.3961		0	52.1396	1.09999	16.9484	0	0.853912	6.91668	0.154597	6.57526	10.2432	4.56907	0.28786	0	0.211404		39.9191	0.0357203	0.108178	0	9.24307e-05	13.8436	0.247923	45.4443	0.400554	0.000494573	3.11591e-05	0	2.28832e-05
	This study	63.9358	27.849	2958	Mountain Jourdanne	30I-2-1-4	MI in Pl-EMPA	49.8624	1.50024	16.2187		8.7682	0.174956	6.10026	9.85407	4.6566	0.3641		0.185368	55.3588		0	50.9932	1.53426	16.5866	0	0.99634	8.07035	0.178924	6.23861	10.0776	4.76221	0.372358	0	0.189572		39.4539	0.0493622	0.107289	0	0.000106852	16.2281	0.288722	43.475	0.396948	0.000510719	3.99332e-05	0	2.03305e-05
	This study	63.9358	27.849	2958	Mountain Jourdanne	30I-2-1-5	MI in Pl-EMPA	50.6398	0.85156	16.6732		7.3593	0.136328	6.50324	10.4483	4.30265	0.265672		0.105008	61.1665		0	52.0093	0.874589	17.1241	0	0.839813	6.80249	0.140015	6.67911	10.7309	4.41901	0.272857	0	0.107848		39.9922	0.0284348	0.10796	0	9.10138e-05	13.5026	0.222635	45.7298	0.415827	0.000478905	2.95705e-05	0	1.16879e-05
	This study	63.9358	27.849	2958	Mountain Jourdanne	30I-2-1-6-1	MI in Pl-EMPA	51.796	0.90718	16.6377		7.22211	0.106785	6.50276	10.1675	4.34239	0.319655		0.19111	61.6108		0	52.706	0.923119	16.93	0	0.816555	6.61409	0.108661	6.61701	10.3461	4.41868	0.325271	0	0.194468		40.0304	0.0300968	0.108559	0	8.87416e-05	13.3418	0.175029	45.907	0.406383	0.000480214	3.53498e-05	0	2.11344e-05
	This study	63.9358	27.849	2958	Mountain Jourdanne	30I-2-1-6-2	MI in Pl-EMPA	50.6415	0.995086	16.8005		7.44361	0.169988	6.65908	10.1018	4.33847	0.293236		0.236566	61.458		0	51.8005	1.01786	17.185	0	0.845996	6.85257	0.173878	6.81148	10.333	4.43776	0.299947	0	0.24198		40.0076	0.0330946	0.106013	0	9.16889e-05	13.3708	0.271971	45.8163	0.393537	0.000480963	3.25082e-05	0	2.62258e-05
	This study	63.9358	27.849	2958	Mountain Jourdanne	30I-2-1-7	MI in Pl-EMPA	50.8482	0.872332	16.6624		7.17047	0.12218	6.47554	10.5152	4.20337	0.278756		0.137506	61.6813		0	52.224	0.895934	17.1132	0	0.818275	6.62803	0.125486	6.65074	10.7997	4.31709	0.286298	0	0.141226		40.0336	0.0291965	0.109017	0	8.8886e-05	13.2918	0.201165	45.9126	0.422064	0.000468949	3.10994e-05	0	1.53409e-05
	This study	63.9358	27.849	2958	Mountain Jourdanne	30I-2-1-8	MI in Pl-EMPA	50.2375	0.930744	17.2069		6.85302	0.129652	6.98709	10.8184	3.99486	0.267688		0.117566	64.5051		0	51.4625	0.95344	17.6265	0	0.780014	6.31812	0.132813	7.15746	11.0822	4.09227	0.274215	0	0.120433		40.2704	0.0311844	0.105731	0	8.50405e-05	12.0339	0.203073	46.943	0.412142	0.000446157	2.98961e-05	0	1.31301e-05
	This study	63.9358	27.849	2958	Mountain Jourdanne	30I-2-1-9-1	MI in Pl-EMPA	50.8648	1.17745	16.3618		7.39097	0.16975	6.2512	10.2439	4.42475	0.2902		0.229	60.1207		0	52.1765	1.20781	16.7838	0	0.842397	6.82341	0.174128	6.41241	10.5081	4.53886	0.297684	0	0.234906		39.888	0.0392163	0.11043	0	9.11722e-05	13.9373	0.28505	45.3193	0.420059	0.000491238	3.22182e-05	0	2.54237e-05
	This study	63.9358	27.849	2958	Mountain Jourdanne	30I-2-1-9-2	MI in Pl-EMPA	50.9347	1.16678	16.3259		7.69458	0.12804	6.17554	10.1731	4.41699	0.30766		0.18729	58.8571		0	52.1893	1.19552	16.7281	0	0.876012	7.0957	0.131194	6.32765	10.4237	4.52579	0.315238	0	0.191903		39.7808	0.0387943	0.110627	0	9.47545e-05	14.5804	0.215439	44.8553	0.418107	0.000489535	3.4098e-05	0	2.07574e-05
	This study	63.9358	27.849	2958	Mountain Jourdanne	30I-2-1-10	MI in Pl-EMPA	50.4176	1.10968	16.7536		7.42733	0.17914	6.63535	10.3257	4.44544	0.277572		0.162068	61.4253		0	51.5433	1.13445	17.1277	0	0.843685	6.83385	0.18314	6.7835	10.5562	4.5447	0.283769	0	0.165687		40.0111	0.0368265	0.106175	0	9.12922e-05	13.3132	0.287437	45.8412	0.403512	0.000491765	3.07057e-05	0	1.79284e-05
	This study	63.9358	27.849	2958	Mountain Jourdanne	30I-2-1-10-2	MI in Pl-EMPA	50.376	1.17787	16.8802		7.20103	0.194014	6.6803	9.98659	4.36287	0.310356		0.203126	62.3145		0	51.693	1.20867	17.3215	0	0.821032	6.65036	0.199086	6.85494	10.2477	4.47693	0.31847	0	0.208436	64.7548	40.0771	0.0393109	0.106878	0	8.90113e-05	12.9319	0.311473	46.1423	0.390377	0.000485362	3.45266e-05	0	2.25974e-05
	This study	63.9358	27.849	2958	Mountain Jourdanne	30I-2-1-11	MI in Pl-EMPA	50.4715	1.16368	16.7855		7.44319	0.10807	6.62168	9.68505	4.68133	0.375966		0.220084	61.3259		0	51.6921	1.19182	17.1915	0	0.847021	6.86087	0.110684	6.78181	9.91927	4.79454	0.385058	0	0.225406		40.0293	0.0386676	0.106801	0	9.1603e-05	13.3323	0.173982	45.9384	0.379783	0.000518516	4.1643e-05	0	2.43771e-05
	This study	63.9358	27.849	2958	Mountain Jourdanne	30I-2-1-12	MI in Pl-EMPA	50.0203	1.15954	16.5448		7.8715	0.13808	6.40598	10.3969	4.24774	0.275272		0.270296	59.1934		0	51.3461	1.19027	16.9834	0	0.897792	7.27212	0.14174	6.57578	10.6725	4.36033	0.282568	0	0.27746		39.8075	0.0386472	0.106955	0	9.71688e-05	14.4438	0.225117	44.9643	0.413089	0.000471922	3.05826e-05	0	3.00297e-05
	This study	63.9358	27.849	2958	Mountain Jourdanne	30I-2-1-13	MI in Pl-EMPA	51.8702	1.18009	16.044		8.05039	0.13077	5.90544	9.53606	4.27778	0.363288		0.224578	56.6635		0	53.1065	1.20822	16.4264	0	0.915808	7.41804	0.133887	6.0462	9.76334	4.37974	0.371947	0	0.229931		39.5471	0.0392392	0.112749	0	9.91421e-05	15.819	0.225133	43.8544	0.401768	0.000474135	4.02657e-05	0	2.48915e-05
	This study	63.9358	27.849	2958	Mountain Jourdanne	30I-2-1-14	MI in Pl-EMPA	50.998	1.18962	16.6227		7.37952	0.143744	6.46872	10.2359	4.46035	0.320016		0.221754	60.9748		0	51.9739	1.21238	16.9408	0	0.835638	6.76866	0.146495	6.59251	10.4318	4.5457	0.32614	0	0.225998		39.9742	0.0394078	0.108441	0	9.05399e-05	13.5389	0.235473	45.6941	0.408909	0.000492519	3.53367e-05	0	2.44865e-05
	This study	63.9358	27.849	2958	Mountain Jourdanne	30I-2-1-15	MI in Pl-EMPA	50.6596	1.0368	16.9882		7.4802	0.10101	6.77867	10.3911	4.56236	0.317208		0.182984	61.763		0	51.3887	1.05172	17.2327	0	0.843095	6.82907	0.102464	6.87623	10.5406	4.62802	0.321773	0	0.185617	64.2186	40.0687	0.0341599	0.105708	0	9.12795e-05	13.1481	0.159517	46.0837	0.399495	0.000501063	3.48375e-05	0	2.00963e-05
	This study	63.9358	27.849	2958	Mountain Jourdanne	30I-2-1-16	MI in Pl-EMPA	50.935	1.04684	16.4728		7.44767	0.115848	6.32082	10.4932	4.38087	0.243742		0.201364	60.203		0	52.1122	1.07103	16.8536	0	0.846645	6.85782	0.118526	6.46691	10.7358	4.48212	0.249376	0	0.206018		39.9082	0.034818	0.109803	0	9.17447e-05	13.9382	0.192843	45.3892	0.426311	0.000485695	2.7023e-05	0	2.23247e-05
	This study	63.9358	27.849	2958	Mountain Jourdanne	30I-2-1-17	MI in Pl-EMPA	50.5232	1.16084	15.9519		9.09028	0.1802	5.79998	9.85355	4.52902	0.375688		0.239112	53.2113		0	51.6572	1.1869	16.3099	0	1.0327	8.36488	0.184245	5.93017	10.0747	4.63067	0.38412	0	0.244479		39.2242	0.0381423	0.11008	0	0.000110624	17.4721	0.30538	42.4409	0.408515	0.00049604	4.11472e-05	0	2.61887e-05
	This study	63.9358	27.849	2958	Mountain Jourdanne	30I-2-1-18	MI in Pl-EMPA	51.5836	0.839089	16.4546		7.68086	0.171157	6.32885	9.77639	4.63472	0.308489		0.046275	59.4926		0	52.6851	0.857006	16.8059	0	0.871652	7.06038	0.174812	6.46399	9.98514	4.73368	0.315076	0	0.0472631		39.842	0.0277371	0.108721	0	9.40373e-05	14.2597	0.282661	45.0845	0.393999	0.000510688	3.39916e-05	0	5.09893e-06
	This study	63.9358	27.849	2958	Mountain Jourdanne	30I-2-1-19	MI in Pl-EMPA	51.3498	0.771143	16.7007		7.27401	0.150973	6.5224	9.62845	4.72198	0.381502		0.147686	61.5127		0	52.5428	0.789059	17.0887	0	0.827001	6.69871	0.154481	6.67394	9.85215	4.83169	0.390365	0	0.151117		40.0393	0.0255738	0.108421	0	8.93452e-05	13.2604	0.246545	45.9357	0.383343	0.000521992	4.21732e-05	0	1.6326e-05
	This study	63.9358	27.849	2958	Mountain Jourdanne	30I-2-1-20	MI in Pl-EMPA	50.1997	1.19151	16.894		6.90974	0.147208	6.70602	10.292	4.37818	0.283696		0.195624	63.3684		0	51.6063	1.2249	17.3673	0	0.789261	6.39301	0.151333	6.89393	10.5804	4.50085	0.291645	0	0.201105		40.183	0.0399062	0.107602	0	8.57116e-05	12.4256	0.237611	46.6011	0.404533	0.000488781	3.16719e-05	0	2.18395e-05
	This study	63.9358	27.849	2958	Mountain Jourdanne	30I-2-1-21	MI in Pl-EMPA	51.1722	1.09394	16.0533		8.62369	0.164838	5.90825	9.43992	4.71343	0.376683		0.204864	54.9789		0	52.2982	1.11801	16.4065	0	0.979273	7.93211	0.168465	6.03826	9.64764	4.81714	0.384972	0	0.209372		39.4124	0.0359849	0.110681	0	0.000105065	16.5131	0.279313	43.2566	0.391277	0.000516824	4.1303e-05	0	2.24632e-05
	(c)	63.927	27.8511	2839	Mountain Jourdanne	87-S01	whole rock-XRF	50.9	1.23	16.94		7.15351	0.14	7.26	10.84	3.92	0.27		0.14	64.3998		0	51.4802	1.24402	17.1331	0	0.803894	6.51154	0.141596	7.34275	10.9636	3.96468	0.273078	0	0.141596		40.2438	0.040779	0.100277	0	8.78388e-05	12.1508	0.211262	46.8548	0.397668	0.000433207	2.98383e-05	0	1.54717e-05
	(c)	63.923	27.8512	2762	Mountain Jourdanne	87-S02	whole rock-XRF	51.12	1.18	17.33		7.01853	0.13	7.16	10.79	3.86	0.19		0.13	64.5184		0	51.6434	1.19208	17.5074	0	0.787822	6.38135	0.131331	7.23331	10.9005	3.89952	0.191945	0	0.131331		40.2483	0.0391206	0.103936	0	8.61799e-05	12.1325	0.19887	46.8754	0.401351	0.000426569	2.09969e-05	0	1.43663e-05
	(c)	63.926	27.8511	2762	Mountain Jourdanne	87-S03	whole rock-XRF	50.74	1.14	17.96		6.58662	0.13	6.73	11.05	3.91	0.2		0.14	64.5545		0	51.4293	1.15549	18.204	0	0.741788	6.00849	0.131766	6.82142	11.2001	3.96311	0.202717	0	0.141902		40.2615	0.0378617	0.115314	0	8.10203e-05	11.9974	0.210686	46.9403	0.436372	0.000432863	2.21413e-05	0	1.54989e-05
	(c)	63.9267	27.8508	2816	Mountain Jourdanne	87-S06	whole rock-XRF	50.57	1.22	17.2		7.05453	0.13	6.99	10.88	3.86	0.27		0.14	63.8484		0	51.396	1.23993	17.4809	0	0.796639	6.45278	0.132123	7.10417	11.0577	3.92305	0.27441	0	0.142287		40.1987	0.0406313	0.105086	0	8.70171e-05	12.3759	0.202452	46.6645	0.412117	0.000428516	2.99739e-05	0	1.5542e-05
	(d)	63.36	28.11	4950	near area of Mountain Jourdanne	ED22-2-1	glass-SIMS data	49	0.95	17.77		9.9	0.19	8.31	10.44	3.25	0.11		0.09	59.9386		0	48.9413	0.948861	17.7487	0	1.09868	8.89932	0.189772	8.30004	10.4275	3.2461	0.109868	0	0.0898921		39.8145	0.0309721	0.0985961	0	0.000119541	14.5025	0.244259	44.9798	0.328936	0.000353191	1.19541e-05	0	9.78067e-06
	(d)	64.06	27.51	2650	Mountain Jourdanne	SMS19-4-4	glass-SIMS data	51.14	1.28	17.09		7.66	0.15	7.85	10.28	3.79	0.14		0.16	64.6224		0	51.3324	1.28482	17.1543	0	0.854314	6.91994	0.150564	7.87954	10.3187	3.80426	0.140527	0	0.160602		40.2386	0.0421961	0.0963486	0	9.35249e-05	12.2141	0.210826	46.8457	0.351686	0.000416467	1.5384e-05	0	1.75817e-05
	(e)	63.936	27.849	2958	Mountain Jourdanne	30I-TVG2-1-GL1-1	glass-EMPA data	51.754	1.725	16.008		7.332	0.123	6.761	10.621	4.008	0.261		0.188	62.1731		0	52.3495	1.74485	16.1922	0	0.82404	6.67473	0.124415	6.83879	10.7432	4.05412	0.264003	0	0.190163	64.6174	40.0389	0.0572507	0.0999759	0	9.01261e-05	13.1776	0.195098	46.0206	0.410077	0.000443403	2.88743e-05	0	2.07983e-05
	(e)	63.936	27.849	2958	Mountain Jourdanne	30I-TVG2-1-GL1-2	glass-EMPA data	51.764	1.353	15.931		7.39	0.103	7.116	10.663	4.005	0.236		0.219	63.1859		0	52.3598	1.36857	16.1144	0	0.830562	6.72755	0.104186	7.1979	10.7857	4.0511	0.238716	0	0.221521		40.1378	0.0449268	0.0952425	0	9.08842e-05	12.7678	0.157058	46.4012	0.395315	0.000443291	2.61215e-05	0	2.42399e-05
	(e)	63.936	27.849	2958	Mountain Jourdanne	30I-TVG2-1-GL1-3	glass-EMPA data	51.726	1.257	15.906		7.169	0.062	6.901	10.52	4.007	0.258		0.176	63.1785		0	52.7484	1.28185	16.2204	0	0.812301	6.57964	0.0632255	7.03741	10.7279	4.0862	0.2631	0	0.179479	65.5937	40.1484	0.0421062	0.0980619	0	8.89418e-05	12.7699	0.0973998	46.4416	0.402006	0.000447413	2.88077e-05	0	1.96518e-05
	(e)	63.936	27.849	2958	Mountain Jourdanne	30I-TVG2-1-GL1-4	glass-EMPA data	51.661	1.258	15.861		7.272	0.126	6.879	10.592	4.072	0.246		0.203	62.7714		0	52.5807	1.2804	16.1434	0	0.822385	6.66132	0.128243	7.00147	10.7806	4.1445	0.25038	0	0.206614	65.1987	40.1034	0.0419568	0.0976615	0	8.98281e-05	12.9118	0.197625	46.2428	0.404146	0.000452698	2.73487e-05	0	2.25682e-05
	(e)	63.936	27.849	2958	Mountain Jourdanne	30I-TVG2-1-GL1-5	glass-EMPA data	52.052	1.505	15.802		7.492	0.178	6.978	10.507	3.838	0.258		0.171	62.4081		0	52.65	1.52229	15.9835	0	0.842008	6.82026	0.180045	7.05816	10.6277	3.88209	0.260964	0	0.172964		40.0353	0.0499916	0.095482	0	9.21711e-05	13.1765	0.274302	45.9741	0.393744	0.000424956	2.85666e-05	0	1.89337e-05
	(e)	63.936	27.849	2958	Mountain Jourdanne	30I-TVG2-1-GL1-6	glass-EMPA data	52.02	1.189	15.919		7.253	0.197	6.877	10.438	4.055	0.257		0.178	62.8257		0	52.8317	1.20755	16.1674	0	0.818464	6.62956	0.200074	6.98431	10.6009	4.11827	0.26101	0	0.180777	65.2514	40.0887	0.0395332	0.097943	0	8.93171e-05	12.8955	0.30866	46.1712	0.397876	0.000449418	2.84834e-05	0	1.97278e-05
	(e)	63.936	27.849	2958	Mountain Jourdanne	30I-TVG2-1-GL1-7	glass-EMPA data	51.335	1.315	15.783		7.38	0.196	6.954	10.764	4.098	0.229		0.158	62.6803		0	52.226	1.33782	16.0569	0	0.834232	6.75728	0.199402	7.07469	10.9508	4.16913	0.232975	0	0.160742	65.1102	40.084	0.0437409	0.0959029	0	9.0919e-05	12.9076	0.303669	46.1589	0.405589	0.000454373	2.53908e-05	0	1.75185e-05
	(e)	63.936	27.849	2958	Mountain Jourdanne	30I-TVG2-1-GL1-8	glass-EMPA data	52.026	1.574	15.772		7.335	0.153	7.011	10.636	3.987	0.238		0.157	63.0137		0	52.5672	1.59037	15.9361	0	0.823478	6.67017	0.154592	7.08393	10.7466	4.02847	0.240476	0	0.158633	65.4338	40.1038	0.052212	0.0953834	0	9.01159e-05	12.8355	0.235956	46.2776	0.398902	0.000440849	2.63161e-05	0	1.73598e-05
	(e)	63.936	27.849	2958	Mountain Jourdanne	30I-TVG2-1-GL1-9	glass-EMPA data	52.017	1.382	15.939		7.519	0.093	6.851	10.674	3.969	0.235		0.18	61.8914		0	52.5729	1.39677	16.1093	0	0.844373	6.83942	0.0939939	6.92422	10.7881	4.01142	0.237512	0	0.181924		40.0215	0.045835	0.0979091	0	9.23604e-05	13.3803	0.145462	45.9022	0.406184	0.000438783	2.59798e-05	0	1.98994e-05
	(e)	63.936	27.849	2958	Mountain Jourdanne	30I-TVG2-1-GL1-10	glass-EMPA data	51.813	1.591	16.076		7.616	0.159	6.915	10.633	4.096	0.241		0.198	61.8084		0	52.1139	1.60024	16.1694	0	0.851136	6.89421	0.159923	6.95516	10.6947	4.11979	0.2424	0	0.19915		40.0063	0.052377	0.0976442	0	9.28611e-05	13.3371	0.246023	45.8597	0.400235	0.000449479	2.64464e-05	0	2.17277e-05
	(e)	63.936	27.849	2958	Mountain Jourdanne	30I-TVG2-2-GL2-1	glass-EMPA data	51.597	1.219	15.831		7.085	0.173	6.87	10.553	3.974	0.249		0.182	63.3478		0	52.7513	1.24627	16.1852	0	0.804834	6.51916	0.17687	7.0237	10.7891	4.06291	0.254571	0	0.186072		40.137	0.0408613	0.0979309	0	8.79598e-05	12.6625	0.272619	46.3839	0.404547	0.000444033	2.78219e-05	0	2.03357e-05
	(e)	63.936	27.849	2958	Mountain Jourdanne	30I-TVG2-2-GL2-2	glass-EMPA data	51.05	1.336	15.827		7.023	0.176	6.871	10.623	4.022	0.24		0.162	63.555		0	52.4084	1.37155	16.2481	0	0.801098	6.48889	0.180683	7.05383	10.9057	4.12902	0.246386	0	0.166311		40.1596	0.0449326	0.0980534	0	8.74811e-05	12.5159	0.27782	46.4952	0.407905	0.000450896	2.69058e-05	0	1.81614e-05
	(e)	63.936	27.849	2958	Mountain Jourdanne	30I-TVG2-2-GL2-3	glass-EMPA data	51.89	1.602	15.721		7.509	0.128	6.811	10.601	3.932	0.253		0.185	61.7847		0	52.5652	1.62285	15.9256	0	0.84519	6.84604	0.129666	6.89963	10.7389	3.98317	0.256292	0	0.187407		39.9978	0.0532671	0.0969865	0	9.24729e-05	13.4219	0.201022	45.8234	0.405071	0.000435801	2.80411e-05	0	2.05044e-05
	(e)	63.936	27.849	2958	Mountain Jourdanne	30I-TVG2-2-GL2-4	glass-EMPA data	52.058	1.266	15.845		7.533	0.069	6.812	10.526	3.797	0.232		0.191	61.7127		0	52.8976	1.28642	16.1006	0	0.8505	6.88905	0.0701129	6.92187	10.6958	3.85824	0.235742	0	0.194081		39.998	0.0423047	0.0977447	0	9.32307e-05	13.5612	0.108426	45.7894	0.402377	0.000422936	2.58417e-05	0	2.12749e-05
	(e)	63.936	27.849	2958	Mountain Jourdanne	30I-TVG2-2-GL2-5	glass-EMPA data	51.841	1.285	15.795		7.39	0.231	6.861	10.527	4.007	0.252		0.151	62.333		0	52.6721	1.3056	16.0482	0	0.834275	6.75763	0.234703	6.97099	10.6958	4.07124	0.25604	0	0.153421	64.7728	40.0345	0.0427127	0.0969288	0	9.09776e-05	13.1202	0.361096	45.9437	0.400317	0.000443968	2.79211e-05	0	1.67305e-05
	(e)	63.923	27.851	2743	Mountain Jourdanne	49I-TVG01	whole rock-XRF	51.17	1.14	17.72		6.98254	0.13	7.34	10.97	3.86	0.2		0.14	65.2015		0	51.3085	1.14308	17.768	0	0.777937	6.30129	0.130352	7.35986	10.9997	3.87045	0.200541	0	0.140379		40.3101	0.0375153	0.104356	0	8.51046e-05	11.8128	0.195204	47.139	0.400461	0.000423418	2.19387e-05	0	1.53571e-05
	(e)	63.923	27.851	2743	Mountain Jourdanne	49I-TVG01duplicate	whole rock-XRF	51.06	1.13	17.76		6.98254	0.13	7.28	10.94	3.92	0.2		0.14	65.015		0	51.2547	1.13431	17.8277	0	0.778796	6.30825	0.130496	7.30776	10.9817	3.93495	0.200763	0	0.140534		40.299	0.0371921	0.105227	0	8.51181e-05	11.8687	0.196454	47.0909	0.401954	0.000430068	2.19422e-05	0	1.53596e-05
	(e)	63.923	27.851	2759	Mountain Jourdanne	20VII-TVG19-1	whole rock-XRF	51.04	1.17	17.52		6.99154	0.13	7.23	10.88	3.86	0.23		0.14	64.8287		0	51.4157	1.17861	17.649	0	0.782556	6.33871	0.130957	7.28322	10.9601	3.88842	0.231693	0	0.141031		40.2787	0.0386712	0.104352	0	8.55875e-05	11.9719	0.197495	47.0064	0.401874	0.000425273	2.53401e-05	0	1.54244e-05
	(e)	63.935	27.842		Mountain Jourdanne	26VI-TVG02-1	whole rock-XRF	51.51	1.58	15.49		8.58421	0.17	6.44	10.63	4.47	0.26		0.19	57.2139		0	51.8107	1.58922	15.5804	0	0.959369	7.77089	0.170992	6.4776	10.6921	4.4961	0.261518	0	0.191109		39.6084	0.0515181	0.0977499	0	0.000103667	15.4321	0.27071	44.1265	0.412487	0.000485835	2.82589e-05	0	2.06507e-05
	(e)	63.935	27.849	2936	Mountain Jourdanne	26VI-TVG03-1	whole rock-XRF	51.42	1.6	15.36		8.87215	0.17	6.43	10.44	4.39	0.28		0.2	56.3662		0	51.803	1.61192	15.4744	0	0.993136	8.0444	0.171266	6.47789	10.5178	4.4227	0.282085	0	0.20149		39.5187	0.0522543	0.0961202	0	0.000107317	15.9199	0.26913	43.7406	0.402586	0.000477909	3.04817e-05	0	2.17726e-05
	(e)	63.935	27.849	2936	Mountain Jourdanne	26VI-TVG03-1-2	whole rock-XRF	51.66	1.63	15.45		8.81816	0.17	6.41	10.49	4.44	0.29		0.2	56.4397		0	51.8383	1.63562	15.5033	0	0.983176	7.96373	0.170587	6.43212	10.5262	4.45532	0.291001	0	0.20069		39.5285	0.0530117	0.0972526	0	0.000106218	15.8579	0.270026	43.7867	0.406026	0.000481333	3.14384e-05	0	2.16817e-05
	(e)	63.94	27.85		Mountain Jourdanne	19III-TVG3-1	whole rock-XRF	51.45	1.62	15.28		8.96213	0.18	6.42	10.41	4.34	0.27		0.2	56.0796		0	51.8483	1.63254	15.3983	0	1.0035	8.12836	0.181394	6.46971	10.4906	4.3736	0.27209	0	0.201548		39.4828	0.052936	0.0954336	0	0.000108463	16.0965	0.284574	43.5863	0.400846	0.00047272	2.94089e-05	0	2.17843e-05
	(g)	63.94	27.85	2985	Mountain Jourdanne	DY0115-017-005A	whole rock-XRF	51.15	1.63	15.05		9.1061	0.17	6.36	10.73	3.87	0.31		0.15	55.4548		0	51.8619	1.65269	15.2595	0	1.02587	8.30955	0.172366	6.44852	10.8793	3.92386	0.314315	0	0.152088		39.3933	0.0538059	0.094107	0	0.00011133	16.5803	0.269618	43.194	0.414338	0.000425826	3.41101e-05	0	1.65049e-05
	(g)	63.935	27.85		Mountain Jourdanne	DY0125-26I-TVG2-001	whole rock-XRF	51.51	1.58	15.49		8.58421	0.17	6.44	10.63	4.47	0.26		0.19	57.2139		0	51.8107	1.58922	15.5804	0	0.959369	7.77089	0.170992	6.4776	10.6921	4.4961	0.261518	0	0.191109		39.6084	0.0515181	0.0977499	0	0.000103667	15.4321	0.27071	44.1265	0.412487	0.000485835	2.82589e-05	0	2.06507e-05
	(g)	63.923	27.85	2759	Mountain Jourdanne	DY0115-20VII-TVG19-001	whole rock-XRF	51.04	1.17	17.52		6.99154	0.13	7.23	10.88	3.86	0.23		0.14	64.8287		0	51.4157	1.17861	17.649	0	0.782556	6.33871	0.130957	7.28322	10.9601	3.88842	0.231693	0	0.141031		40.2787	0.0386712	0.104352	0	8.55875e-05	11.9719	0.197495	47.0064	0.401874	0.000425273	2.53401e-05	0	1.54244e-05
	(g)	63.935	27.85	2936	Mountain Jourdanne	DY0125-26I-TVG3-001	whole rock-XRF	51.42	1.6	15.36		8.87215	0.17	6.43	10.44	4.39	0.28		0.2	56.3662		0	51.803	1.61192	15.4744	0	0.993136	8.0444	0.171266	6.47789	10.5178	4.4227	0.282085	0	0.20149		39.5187	0.0522543	0.0961202	0	0.000107317	15.9199	0.26913	43.7406	0.402586	0.000477909	3.04817e-05	0	2.17726e-05
	(g)	63.935	27.85	2936	Mountain Jourdanne	DY0125-26I-TVG3-001-002	whole rock-XRF	51.66	1.63	15.45		8.81816	0.17	6.41	10.49	4.44	0.29		0.2	56.4397		0	51.8383	1.63562	15.5033	0	0.983176	7.96373	0.170587	6.43212	10.5262	4.45532	0.291001	0	0.20069		39.5285	0.0530117	0.0972526	0	0.000106218	15.8579	0.270026	43.7867	0.406026	0.000481333	3.14384e-05	0	2.16817e-05
	(g)	63.94	27.85		Mountain Jourdanne	DY0115-19III-TVG3-001	whole rock-XRF	51.45	1.62	15.28		8.96213	0.18	6.42	10.41	4.34	0.27		0.2	56.0796		0	51.8483	1.63254	15.3983	0	1.0035	8.12836	0.181394	6.46971	10.4906	4.3736	0.27209	0	0.201548		39.4828	0.052936	0.0954336	0	0.000108463	16.0965	0.284574	43.5863	0.400846	0.00047272	2.94089e-05	0	2.17843e-05
	(g)	63.91	27.85	2800	Mountain Jourdanne	DUF0107-016-001-001	whole rock-EMPA data	50.95	1.15	17.01		7.88	0.12	7.79	11.35	3.63	0.12		0.13	63.7954		0	50.8394	1.1475	16.9731	0	0.873655	7.0766	0.11974	7.77309	11.3254	3.62212	0.11974	0	0.129718		40.1799	0.0376834	0.0955995	0	9.56345e-05	12.568	0.168796	46.561	0.388484	0.000396495	1.31073e-05	0	1.41995e-05
	(g)	63.91	27.85	2800	Mountain Jourdanne	DUF0107-016-002-001	whole rock-EMPA data	51.28	1.29	17.01		7.95	0.15	7.37	10.9	3.86	0.19		0.14	62.2982		0	51.1632	1.28706	16.9712	0	0.881321	7.1387	0.149658	7.35321	10.8752	3.85121	0.189567	0	0.139681		40.0502	0.0421351	0.0978755	0	9.61741e-05	13.1833	0.219506	46.0187	0.38776	0.000420262	2.06865e-05	0	1.52427e-05
	(g)	63.91	27.85	2800	Mountain Jourdanne	DUF0107-016-002-003	whole rock-EMPA data	51.34	1.25	17.04		8.01	0.11	7.51	10.94	3.77	0.19		0.14	62.5633		0	51.1411	1.24516	16.974	0	0.886551	7.18107	0.109574	7.4809	10.8976	3.75539	0.189264	0	0.139458	64.9965	40.0766	0.040834	0.0969946	0	9.69128e-05	13.1135	0.158617	46.1294	0.38355	0.000410518	2.06892e-05	0	1.52447e-05
	(g)	63.91	27.85	2800	Mountain Jourdanne	DUF0107-016-003-001	whole rock-EMPA data	51.34	1.32	17.13		7.89	0.08	7.46	10.87	3.81	0.19		0.16	62.7601		0	51.1672	1.31556	17.0724	0	0.873716	7.0771	0.0797308	7.43489	10.8334	3.79718	0.189361	0	0.159462		40.101	0.0431708	0.0981181	0	9.55718e-05	13.0104	0.116327	46.2462	0.38426	0.000415356	2.07133e-05	0	1.74428e-05
	(g)	63.75	27.85	4475	Mountain Jourdanne	DUF0107-019-001-002	whole rock-EMPA data	50.97	1.29	16.97		7.4	0.15	7.73	10.75	3.97	0.25		0.18	65.0585		0	51.1017	1.29333	17.0139	0	0.824347	6.67721	0.150388	7.74998	10.7778	3.98026	0.250646	0	0.180465		40.2975	0.0423958	0.0963168	0	9.00744e-05	11.8814	0.214499	47.0935	0.37388	0.000434913	2.73875e-05	0	1.9719e-05
	(g)	63.75	27.85	4475	Mountain Jourdanne	DUF0107-019-001-005	whole rock-EMPA data	51.12	1.28	16.96		7.43	0.14	7.64	10.62	4.01	0.26		0.18	64.6994		0	51.2622	1.28356	17.0072	0	0.827852	6.7056	0.14039	7.66126	10.6495	4.02116	0.260723	0	0.180501		40.2698	0.0420642	0.0967459	0	9.04331e-05	12.0427	0.201901	46.9738	0.372419	0.000439264	2.84809e-05	0	1.97176e-05
	(g)	63.75	27.85	4475	Mountain Jourdanne	DUF0107-019-001-007	whole rock-EMPA data	51.16	1.27	17.03		7.33	0.15	7.67	10.59	4.01	0.25		0.16	65.0974		0	51.3132	1.2738	17.081	0	0.816883	6.61675	0.150449	7.69297	10.6217	4.02201	0.250749	0	0.160479		40.3004	0.0417532	0.0971019	0	8.92536e-05	11.8666	0.216114	47.1064	0.371021	0.000439449	2.73971e-05	0	1.75341e-05
	(g)	63.36	27.85	4950	Mountain Jourdanne	DUF0107-022-001-001	whole rock-EMPA data	48.67	0.95	18.22		9.69	0.14	8.44	10.3	3.39	0.12		0.14	60.8228		0	48.5885	0.94841	18.1895	0	1.07486	8.7064	0.139766	8.42587	10.2828	3.38433	0.119799	0	0.139766		39.919	0.0309388	0.101134	0	0.00011688	14.0052	0.178896	45.4415	0.322785	0.000368009	1.30269e-05	0	1.5198e-05
	(g)	63.36	27.85	4950	Mountain Jourdanne	DUF0107-022-001-003	whole rock-EMPA data	48.65	1	18.25		10.11	0.19	7.7	10.49	3.46	0.1		0.1	57.583		0	48.5712	0.998379	18.2204	0	1.12151	9.08425	0.189692	7.68752	10.473	3.45439	0.0998379	0	0.0998379		39.613	0.0324273	0.100529	0	0.000121422	15.5415	0.256916	44.1094	0.345706	0.000373995	1.08091e-05	0	1.08091e-05
	(g)	63.36	27.85	4950	Mountain Jourdanne	DUF0107-022-002-001	whole rock-EMPA data	49	0.95	17.77		9.9	0.19	8.31	10.44	3.25	0.11		0.09	59.9386		0	48.9413	0.948861	17.7487	0	1.09868	8.89932	0.189772	8.30004	10.4275	3.2461	0.109868	0	0.0898921		39.8145	0.0309721	0.0985961	0	0.000119541	14.5025	0.244259	44.9798	0.328936	0.000353191	1.19541e-05	0	9.78067e-06
	(g)	63.36	27.85	4950	Mountain Jourdanne	DUF0107-022-002-002	whole rock-EMPA data	51.31	1.81	16.43		8.81	0.14	6.8	8.65	4.78	0.32		0.23	57.9084		0	51.6312	1.82133	16.5329	0	0.985017	7.97864	0.140876	6.84257	8.70415	4.80992	0.322003	0	0.23144		39.6809	0.058995	0.0983417	0	0.000106353	15.124	0.213575	44.5026	0.320969	0.00051933	3.47669e-05	0	2.49887e-05
	(g)	63.938	27.845	3030	Mountain Jourdanne	SHK0446-001	LA-ICPMS	50.6	1.8	16		9.9	0.19	6.16	10.6	4.74	0.28		0.23	52.5858		0	50.2932	1.78909	15.903	0	1.09333	8.85598	0.188848	6.12265	10.5357	4.71126	0.278302	0	0.228606		39.169	0.057384	0.101668	0	0.000116893	17.7069	0.302034	42.2512	0.411146	0.000503704	2.97547e-05	0	2.44413e-05
	(a)	51.56	37.43	1900-2700	Mountain Jourdanne	PUB-1-MI1	MI in Pl-EMPA	52.694	1.256	16.718		7.4545	0.1235	6.657	9.8815	4.0065	0.2965		0.1625	61.416		0	53.0479	1.26444	16.8303	0	0.833841	6.75411	0.124329	6.70171	9.94787	4.03341	0.298491	0	0.163591		39.968	0.0414432	0.105683	0	9.11001e-05	13.6237	0.197512	45.6782	0.384939	0.000440664	3.26113e-05	0	1.7873e-05
	(a)	51.56	37.43	1900-2700	Mountain Jourdanne	PUB-1-MI2	MI in Pl-EMPA	52.7085	1.275	16.6135		7.51	0.1615	6.563	9.987	3.9245	0.279		0.1535	60.902		0	53.102	1.28452	16.7375	0	0.840674	6.80946	0.162706	6.612	10.0616	3.9538	0.281083	0	0.154646		39.9063	0.0420875	0.106173	0	9.18162e-05	13.8815	0.260421	45.4105	0.392433	0.000431823	3.06991e-05	0	1.689e-05
	(a)	51.56	37.43	1900-2700	Mountain Jourdanne	PUB-1-MI3	MI in Pl-EMPA	52.5755	1.142	16.756		7.5765	0.1425	6.7055	9.9395	3.991	0.2885		0.163	61.2031		0	52.9119	1.14931	16.8632	0	0.84722	6.86248	0.143412	6.74841	10.0031	4.01654	0.290346	0	0.164043		39.9468	0.0376312	0.104751	0	9.24671e-05	13.7303	0.225879	45.5705	0.383623	0.000438372	3.16889e-05	0	1.79039e-05
	(a)	51.56	37.43	1900-2700	Mountain Jourdanne	PUB-1-MI4	MI in Pl-EMPA	52.984	1.294	16.699		7.4055	0.114	6.7435	9.9395	3.896	0.279		0.163	61.8772		0	53.1969	1.2992	16.7661	0	0.82614	6.69173	0.114458	6.7706	9.97944	3.91166	0.280121	0	0.163655		40.0003	0.042684	0.104414	0	9.04736e-05	13.467	0.180769	45.8206	0.383752	0.00042838	3.06771e-05	0	1.79225e-05
	(a)	51.56	37.43	1900-2700	Mountain Jourdanne	PUB-2-MI1	MI in Pl-EMPA	51.5656	1.3096	16.9404		6.866	0.1596	6.6956	10.6112	3.7072	0.2084		0.1848	63.4797		0	52.4442	1.33191	17.229	0	0.775887	6.28469	0.162319	6.80968	10.792	3.77037	0.211951	0	0.187949		40.1323	0.0437849	0.108016	0	8.50208e-05	12.6487	0.25773	46.3916	0.417314	0.000413152	2.32253e-05	0	2.05952e-05
	(a)	51.56	37.43	1900-2700	Mountain Jourdanne	PUB-2-MI2	MI in Pl-EMPA	51.837	1.0813	16.9751		6.6156	0.1757	6.6336	10.3897	3.7237	0.228		0.1335	64.1228		0	52.9669	1.10487	17.3451	0	0.75109	6.08383	0.17953	6.7782	10.6162	3.80487	0.23297	0	0.13641		40.1857	0.0363187	0.109986	0	8.2298e-05	12.3646	0.287513	46.6011	0.414239	0.000416905	2.55269e-05	0	1.49467e-05
	(e)	63.936	27.849	2958	Mountain Jourdanne	C1-1	MI in Pl-EMPA	52.6854	1.24896	16.8571		7.37682	0.1222	6.5923	9.9117	4.01554	0.29386		0.1613	61.4328		0	53.0316	1.25717	16.9679	0	0.825033	6.68277	0.123003	6.63563	9.97684	4.04193	0.295791	0	0.16236		39.9711	0.041197	0.107903	0	9.01203e-05	13.598	0.197241	45.6941	0.389893	0.000441509	3.23099e-05	0	1.7735e-05
	(e)	63.936	27.849	2958	Mountain Jourdanne	C1-2	MI in Pl-EMPA	51.7548	1.33356	16.7067		7.42382	0.0846	6.6299	9.8741	4.24114	0.31266		0.1801	61.417		0	52.4769	1.35217	16.9398	0	0.836379	6.77467	0.0857805	6.72241	10.0119	4.30032	0.317023	0	0.182613		39.9998	0.0441987	0.106229	0	9.11298e-05	13.4988	0.136045	45.8275	0.386791	0.000468552	3.4542e-05	0	1.98971e-05
	(e)	63.936	27.849	2958	Mountain Jourdanne	C1-2	MI in Pl-EMPA	52.676	1.26776	16.7631		7.43322	0.1598	6.4983	10.0245	3.93094	0.27506		0.1519	60.9108		0	53.067	1.27717	16.8875	0	0.832045	6.73956	0.160986	6.54654	10.0989	3.96012	0.277102	0	0.153028		39.9088	0.0418371	0.10853	0	9.08528e-05	13.8587	0.260085	45.4237	0.397812	0.000432414	3.02574e-05	0	1.67094e-05
	(e)	63.936	27.849	2958	Mountain Jourdanne	C1-3	MI in Pl-EMPA	52.1106	1.03244	17.0542		6.9738	0.132	6.88716	10.1759	3.65804	0.321		0.16828	63.7719		0	52.8554	1.0472	17.298	0	0.785941	6.36612	0.133887	6.98559	10.3213	3.71032	0.325588	0	0.170685		40.1629	0.0344617	0.105684	0	8.62139e-05	12.6016	0.208216	46.4961	0.390546	0.000407004	3.57154e-05	0	1.87233e-05
	(e)	63.936	27.849	2958	Mountain Jourdanne	C1-3	MI in Pl-EMPA	52.181	1.06764	17.1686		6.6834	0.132	6.98396	10.0879	3.67564	0.3386		0.15948	65.0667		0	52.9474	1.08332	17.4208	0	0.753507	6.1034	0.133939	7.08653	10.236	3.72962	0.343573	0	0.161822		40.2739	0.0356952	0.105945	0	8.27596e-05	12.0064	0.207496	46.9843	0.385764	0.000409635	3.77355e-05	0	1.77734e-05
	(e)	63.936	27.849	2958	Mountain Jourdanne	C1-4	MI in Pl-EMPA	52.5909	1.12755	17.0181		7.42191	0.1395	6.56735	9.98743	4.003	0.28236		0.1581	61.1983		0	52.9197	1.1346	17.1245	0	0.829812	6.72148	0.140372	6.60841	10.0499	4.02803	0.284125	0	0.159088		39.9488	0.0371385	0.109175	0	9.05399e-05	13.7019	0.225438	45.5836	0.393409	0.000439494	3.10006e-05	0	1.7358e-05
	(e)	63.936	27.849	2958	Mountain Jourdanne	C1-4	MI in Pl-EMPA	52.9908	1.27635	16.9623		7.25451	0.1116	6.60455	9.98743	3.91	0.27306		0.1581	61.8719		0	53.1987	1.28136	17.0288	0	0.809218	6.55467	0.112038	6.63045	10.0266	3.92534	0.274131	0	0.15872		40.0025	0.0420837	0.108827	0	8.85907e-05	13.438	0.180415	45.8341	0.393535	0.000429734	3.0011e-05	0	1.73762e-05
	(e)	63.936	27.849	2958	Mountain Jourdanne	C1-6	MI in Pl-EMPA	52.4277	1.15726	16.6834		7.07305	0.1302	6.93907	9.89651	4.03863	0.31054		0.14922	63.6188		0	53.0193	1.17032	16.8717	0	0.794763	6.43758	0.131669	7.01737	10.0082	4.0842	0.314044	0	0.150904		40.1677	0.0384037	0.102547	0	8.6933e-05	12.5812	0.203775	46.5289	0.376836	0.00044674	3.43509e-05	0	1.65062e-05
	(e)	63.936	27.849	2958	Mountain Jourdanne	C1-7	MI in Pl-EMPA	52.2597	1.0418	16.7145		6.9673	0.0665	6.7225	10.6783	3.8533	0.2289		0.112	63.2327		0	52.9361	1.05528	16.9308	0	0.784164	6.35173	0.0673607	6.80951	10.8165	3.90317	0.231863	0	0.11345	65.6464	40.1441	0.0346965	0.106182	0	8.59412e-05	12.7809	0.106987	46.4082	0.418388	0.000427772	2.54112e-05	0	1.24336e-05
	(e)	63.936	27.849	2958	Mountain Jourdanne	C1-7	MI in Pl-EMPA	51.7268	1.08902	16.9665		7.01427	0.07595	6.61325	10.5272	4.00257	0.25831		0.1492	62.694		0	52.514	1.10559	17.2247	0	0.791224	6.40892	0.0771059	6.71389	10.6874	4.06348	0.262241	0	0.151471	65.1235	40.1086	0.0362411	0.109459	0	8.64539e-05	12.9371	0.12359	46.267	0.417463	0.000444001	2.8654e-05	0	1.65506e-05
	(e)	63.936	27.849	2958	Mountain Jourdanne	C1-7	MI in Pl-EMPA	51.9816	1.33472	16.8664		7.32367	0.13055	6.61325	10.3452	3.99347	0.25831		0.1583	61.679		0	52.4607	1.34702	17.0218	0	0.821241	6.65205	0.131753	6.6742	10.4405	4.03027	0.260691	0	0.159759		39.9966	0.0441137	0.107716	0	8.96495e-05	13.4257	0.210479	45.8084	0.406408	0.000439959	2.84579e-05	0	1.74398e-05
	(e)	63.936	27.849	2958	Mountain Jourdanne	C1-7	MI in Pl-EMPA	51.8087	1.37112	16.8664		7.30547	0.13055	6.83165	10.5272	3.92977	0.24011		0.1583	62.5023		0	52.2	1.38148	16.9937	0	0.81785	6.62458	0.131536	6.88325	10.6067	3.95945	0.241923	0	0.159496	64.9373	40.0673	0.0453001	0.104452	0	8.93939e-05	13.0606	0.205481	46.1131	0.403274	0.000432782	2.64431e-05	0	1.74334e-05
	(e)	63.936	27.849	2958	Mountain Jourdanne	C1-7	MI in Pl-EMPA	52.1363	1.32562	16.9665		7.15987	0.08505	6.94995	10.3634	3.98437	0.24011		0.1674	63.3723		0	52.4204	1.33284	17.0589	0	0.799876	6.47899	0.0855134	6.98782	10.4198	4.00608	0.241418	0	0.168312		40.1541	0.0437774	0.104026	0	8.75735e-05	12.6837	0.132735	46.4876	0.393526	0.000438601	2.64314e-05	0	1.84275e-05
	(e)	63.936	27.849	2958	Mountain Jourdanne	C2-2	MI in Pl-EMPA	51.734	1.3024	16.942		6.86912	0.15852	6.68996	10.5282	3.78424	0.20912		0.1848	63.4496		0	52.5332	1.32252	17.2037	0	0.775027	6.27772	0.160969	6.79332	10.6908	3.8427	0.212351	0	0.187655	65.8567	40.1333	0.043452	0.108173	0	8.48795e-05	12.6478	0.256128	46.3962	0.414333	0.000420846	2.32563e-05	0	2.05516e-05
	(e)	63.936	27.849	2958	Mountain Jourdanne	C2-2	MI in Pl-EMPA	51.9792	1.0769	16.9578		6.61406	0.16921	6.63063	10.3334	3.78222	0.22866		0.1335	64.1179		0	53.0513	1.09911	17.3076	0	0.750053	6.07543	0.1727	6.76739	10.5465	3.86023	0.233376	0	0.136254		40.1894	0.0361203	0.110003	0	8.21637e-05	12.3574	0.277033	46.6173	0.412247	0.000422865	2.55649e-05	0	1.49257e-05
	(e)	63.936	27.849	2958	Mountain Jourdanne	C2-4	MI in Pl-EMPA	52.513	0.9844	16.8709		6.75048	0.08472	6.51152	10.0501	3.98888	0.29784		0.1384	63.2264		0	53.4401	1.00178	17.1687	0	0.763295	6.18269	0.0862157	6.62648	10.2275	4.0593	0.303098	0	0.140843	65.6402	40.1452	0.0328943	0.111506	0	8.35448e-05	12.7411	0.14042	46.422	0.406301	0.000444302	3.3175e-05	0	1.54157e-05
	(e)	63.936	27.849	2958	Mountain Jourdanne	C2-7	MI in Pl-EMPA	52.4552	1.23552	16.6068		6.81092	0.1274	6.77029	10.4144	3.8619	0.24894		0.1474	63.9224		0	53.1168	1.2511	16.8162	0	0.766314	6.20715	0.129007	6.85569	10.5458	3.91061	0.25208	0	0.149259		40.1829	0.0411571	0.10512	0	8.40305e-05	12.4593	0.204405	46.5997	0.406876	0.00042882	2.76419e-05	0	1.63671e-05
	(e)	63.936	27.849	2958	Mountain Jourdanne	C2-7	MI in Pl-EMPA	51.891	1.23552	16.9344		6.59252	0.1001	6.61559	10.5509	4.0803	0.23074		0.1656	64.1407		0	52.6973	1.25472	17.1975	0	0.743885	6.02547	0.101655	6.71839	10.7149	4.1437	0.234326	0	0.168173		40.2277	0.0411775	0.110698	0	8.13763e-05	12.2314	0.164505	46.8011	0.422771	0.000453295	2.56337e-05	0	1.83971e-05
	(e)	63.936	27.849	2958	Mountain Jourdanne	C2-8	MI in Pl-EMPA	52.0063	1.10371	17.0035		6.79064	0.0819	6.83192	10.5216	3.92952	0.26678		0.16443	64.1997		0	52.6509	1.11739	17.2143	0	0.763868	6.18733	0.0829151	6.9166	10.652	3.97823	0.270087	0	0.166468		40.2305	0.0367244	0.106941	0	8.36849e-05	12.2911	0.130706	46.7946	0.408803	0.000435831	2.95891e-05	0	1.82373e-05
	(e)	63.936	27.849	2958	Mountain Jourdanne	C2-8	MI in Pl-EMPA	52.5341	0.98541	17.1764		6.60864	0.1092	6.86832	10.3487	4.06602	0.29408		0.12803	64.9427		0	52.9619	0.993434	17.3163	0	0.740273	5.99621	0.110089	6.92425	10.4329	4.09913	0.296475	0	0.129073		40.2945	0.0326189	0.108127	0	8.10215e-05	11.926	0.174208	47.0619	0.402022	0.000448642	3.24486e-05	0	1.41267e-05
	(e)	63.936	27.849	2958	Mountain Jourdanne	C2-8	MI in Pl-EMPA	51.6423	1.24021	16.9762		6.72694	0.1456	6.78642	10.7855	3.65652	0.23948		0.20083	64.2627		0	52.4422	1.25942	17.2392	0	0.759015	6.14802	0.147855	6.89154	10.9525	3.71316	0.243189	0	0.203941		40.2038	0.0414561	0.107337	0	8.32812e-05	12.3013	0.233569	46.6907	0.421236	0.000407418	2.66834e-05	0	2.23769e-05
	(a) Li W (2017) Petrogeochemical characteristics of basalts from Southwest Indian Ridge: Implications for magmatic processes at ultra-slow spreading ridge. Institute of Geophysics & Geomatics, Doctor thesis.
	(b) Ou Q, Nichols ARL, Carvalho BB, Zi F, Wang K, Li J, Zhang L. Liu JY (2021) The role of axial discontinuities in oceanic crustal evolution: Evidence from elemental and Mo-Sr-Nd-Pb-Hf isotopic compositions of rock suites from the Southwest Indian Ridge (42°–53°E). Mar Geol 442: 106626
	(c) Dong Z, Tao C, Liang J, Liao S, Li W, Zhang G, Cao Z (2021) Geochemistry of Basalts from Southwest Indian Ridge 64◦ E: Implications for the Mantle Heterogeneity East of the Melville Transform. Minerals 11: 175
	(d) Paquet M, Cannat M, Brunelli D, Hamelin C, Humler E (2016) Effect of melt/mantle interactions on MORB chemistry at the easternmost Southwest Indian Ridge (61°–67°E). Geochem Geophys Geosyst 17(11):4605-4640
	(e) Li W, Tao C, Zhang W, Liu J, Liang J, Liao S, Yang W (2019) Melt Inclusions in Plagioclase Macrocrysts at Mountain Jourdanne, Southwest Indian Ridge (~64° E): Implications for an Enriched Mantle Source and Shallow Magmatic Processes. Minerals 9: 493
	(g) Data extracted from the EarthChem library (http://www.earthchem.org/library/search)
[truncated: 50 more columns]
