# Supplementary material for: Magmatic processes within the plumbing system of the ultraslow-spreading southwest Indian ridge: constraints from olivine, plagioclase and melt inclusions
Source: Springer Nature journal article supplement (doi:10.1007/s00410-024-02098-0), 2024-02-22
Supplement: MOESM14 [file 410_2024_2098_MOESM14_ESM.xls]

## Sheet: 1Density during crystallization
	Supplemental Table S13. (part 1) Results of the liquid and its related minerals (i.e. plagioclase and olivine) density for during crystallization of the representative primary magma to the studied PUBs
	Zone	Crystallization stage No.	Magma density	MgO contents of magma		Temperature	An value of plagioclase during crystallization	a1	a2	V/Vo	ρ(T,Pl) of plagioclase density (unadjusted to account for thermal expansion)	ρ(T,Pl) of plagioclase density during crystallization	Fo value of olivine magma during crystallization		ρ(T)-Fo	ρ(T)-Fa	ρ(T,Ol) of liquid during crystallization
	Starting material: sample 30I-2-1-17 in Mountain Jourdanne
	Mountain Jourdanne	1	2.667	9.5336		1228.56	no Pl occuring
	Mountain Jourdanne	2	2.665	9.1658		1219.04	no Pl occuring
	Mountain Jourdanne	3	2.664	8.7903		1209.03	no Pl occuring
	Mountain Jourdanne	4	2.662	8.4146		1198.68	no Pl occuring
	Mountain Jourdanne	5	2.661	8.0316		1187.77	no Pl occuring
	Mountain Jourdanne	6	2.659	7.649		1176.46	no Pl occuring
	Mountain Jourdanne	7	2.658	7.2595		1164.51	no Pl occuring
	Mountain Jourdanne	8	2.656	6.8673		1151.98	no Pl occuring
	Mountain Jourdanne	9	2.654	6.4728		1138.82	no Pl occuring
	Mountain Jourdanne	10	2.654	6.3932		1136.12	57.02	9.5761e-06	6.7192e-09	0.0189357	2.6971	2.64603	81.65		3.07065	4.2275	3.28293
	Mountain Jourdanne	11	2.654	6.3535		1134.62	56.77	9.6024e-06	6.7292e-09	0.0189405	2.69672	2.64565	81.5		3.07087	4.22775	3.28489
	Mountain Jourdanne	12	2.655	6.3024		1132.71	56.46	9.63532e-06	6.7416e-09	0.0189452	2.69625	2.64517	81.3		3.07115	4.22808	3.2875
	Mountain Jourdanne	13	2.655	6.2481		1130.73	56.15	9.66858e-06	6.754e-09	0.0189484	2.69579	2.64471	81.09		3.07144	4.22842	3.29023
	Mountain Jourdanne	14	2.656	6.1942		1128.69	55.83	9.70328e-06	6.7668e-09	0.0189522	2.6953	2.64422	80.88		3.07174	4.22877	3.29296
	Mountain Jourdanne	15	2.657	6.1366		1126.61	55.52	9.73725e-06	6.7792e-09	0.0189535	2.69484	2.64376	80.66		3.07205	4.22912	3.29583
	Mountain Jourdanne	16	2.657	6.08		1124.43	55.19	9.77378e-06	6.7924e-09	0.0189559	2.69434	2.64326	80.44		3.07237	4.2295	3.2987
	Mountain Jourdanne	17	2.658	6.0197		1122.08	54.86	9.81072e-06	6.8056e-09	0.0189542	2.69384	2.64278	80.2		3.07271	4.2299	3.30184
	Mountain Jourdanne	18	2.658	5.964		1119.87	54.53	9.84804e-06	6.8188e-09	0.0189562	2.69334	2.64228	79.98		3.07304	4.23027	3.30472
	Mountain Jourdanne	19	2.659	5.9009		1117.48	54.2	9.88575e-06	6.832e-09	0.0189542	2.69284	2.6418	79.73		3.07339	4.23068	3.30797
	Mountain Jourdanne	20	2.66	5.8382		1115.02	53.86	9.92502e-06	6.8456e-09	0.018952	2.69233	2.6413	79.48		3.07375	4.2311	3.31124
	Mountain Jourdanne	21	2.66	5.7724		1112.36	53.52	9.9647e-06	6.8592e-09	0.0189451	2.69182	2.64082	79.21		3.07414	4.23155	3.31476
	Mountain Jourdanne	22	2.661	5.7069		1109.79	53.17	1.0006e-05	6.8732e-09	0.0189425	2.69129	2.64031	78.94		3.07451	4.23199	3.31828
	Mountain Jourdanne	23	2.662	5.6384		1106.94	52.82	1.00477e-05	6.8872e-09	0.0189332	2.69076	2.63981	78.66		3.07493	4.23247	3.32195
	Mountain Jourdanne	24	2.662	5.5701		1104.15	52.46	1.00911e-05	6.9016e-09	0.0189273	2.69021	2.6393	78.38		3.07534	4.23295	3.32561
	Mountain Jourdanne	25	2.663	5.4988		1101.17	52.1	1.01349e-05	6.916e-09	0.0189165	2.68967	2.63879	78.08		3.07577	4.23345	3.32954
	Mountain Jourdanne	26	2.664	5.4242		1098.05	51.74	1.01792e-05	6.9304e-09	0.0189026	2.68913	2.6383	77.77		3.07623	4.23398	3.3336
	Mountain Jourdanne	27	2.664	5.3722		1095.96	51.51	1.02078e-05	6.9396e-09	0.0188916	2.68878	2.63798	77.56		3.07653	4.23434	3.33634
	Mountain Jourdanne	28	2.664	5.356		1095.47	51.41	1.02203e-05	6.9436e-09	0.0188973	2.68863	2.63782	77.47		3.0766	4.23442	3.33746
	Mountain Jourdanne	29	2.665	5.3075		1094.1	51.15	1.02529e-05	6.954e-09	0.0189096	2.68824	2.6374	77.24		3.0768	4.23465	3.34033
	Mountain Jourdanne	30	2.665	5.2558		1092.65	50.88	1.0287e-05	6.9648e-09	0.018922	2.68783	2.63697	76.97		3.07701	4.2349	3.34367
	Mountain Jourdanne	31	2.665	5.2033		1091.17	50.61	1.03214e-05	6.9756e-09	0.0189337	2.68742	2.63654	76.69		3.07723	4.23515	3.34714
	Mountain Jourdanne	32	2.666	5.1501		1089.64	50.33	1.03573e-05	6.9868e-09	0.018946	2.687	2.63609	76.4		3.07745	4.23541	3.35073
	Mountain Jourdanne	33	2.666	5.0961		1088.08	50.05	1.03935e-05	6.998e-09	0.0189577	2.68658	2.63564	76.11		3.07768	4.23567	3.35432
	Mountain Jourdanne	34	2.667	5.0398		1086.47	49.77	1.043e-05	7.0092e-09	0.0189684	2.68615	2.6352	75.82		3.07791	4.23594	3.35793
	Mountain Jourdanne	35	2.667	4.9842		1084.84	49.48	1.04681e-05	7.0208e-09	0.0189807	2.68571	2.63474	75.52		3.07815	4.23622	3.36164
	Mountain Jourdanne	36	2.668	4.9263		1083.14	49.19	1.05065e-05	7.0324e-09	0.0189913	2.68528	2.63428	75.22		3.0784	4.23651	3.36538
	Mountain Jourdanne	37	2.668	4.8667		1081.39	48.89	1.05465e-05	7.0444e-09	0.0190024	2.68482	2.63381	74.86		3.07865	4.2368	3.36981
	Mountain Jourdanne	38	2.668	4.8062		1079.6	48.59	1.05869e-05	7.0564e-09	0.019013	2.68437	2.63333	74.54		3.07891	4.2371	3.37379
	Mountain Jourdanne	39	2.669	4.7462		1077.79	48.28	1.06289e-05	7.0688e-09	0.0190247	2.6839	2.63284	74.22		3.07917	4.23741	3.37777
	Mountain Jourdanne	40	2.669	4.6822		1075.86	47.97	1.06713e-05	7.0812e-09	0.0190338	2.68343	2.63236	73.84		3.07945	4.23774	3.38246
	Mountain Jourdanne	41	2.67	4.6159		1073.82	47.66	1.07141e-05	7.0936e-09	0.0190402	2.68297	2.63188	73.46		3.07975	4.23808	3.38717
	Mountain Jourdanne	42	2.67	4.5524		1071.9	47.34	1.07585e-05	7.1064e-09	0.0190517	2.68248	2.63138	73.12		3.08003	4.2384	3.3914
	Mountain Jourdanne	43	2.671	4.4839		1069.8	47.02	1.08034e-05	7.1192e-09	0.0190588	2.682	2.63088	72.72		3.08033	4.23875	3.39635
	Mountain Jourdanne	44	2.671	4.4145		1067.65	46.69	1.085e-05	7.1324e-09	0.0190666	2.6815	2.63037	72.31		3.08064	4.23912	3.40142
	Mountain Jourdanne	45	2.671	4.3428		1065.43	46.36	1.0897e-05	7.1456e-09	0.0190728	2.681	2.62987	71.9		3.08096	4.23949	3.40651
	Mountain Jourdanne	46	2.672	4.2711		1063.15	46.02	1.09459e-05	7.1592e-09	0.0190793	2.68049	2.62935	71.48		3.08129	4.23987	3.41172
	Mountain Jourdanne	47	2.672	4.1962		1060.77	45.68	1.09952e-05	7.1728e-09	0.0190836	2.67998	2.62883	71.05		3.08164	4.24027	3.41706
	Mountain Jourdanne	48	2.673	4.1198		1058.3	45.33	1.10464e-05	7.1868e-09	0.0190876	2.67945	2.6283	70.61		3.08199	4.24069	3.42253
	Mountain Jourdanne	49	2.673	4.0405		1055.74	44.98	1.1098e-05	7.2008e-09	0.0190893	2.67892	2.62778	70.11		3.08236	4.24112	3.42871
	Mountain Jourdanne	50	2.673	3.9618		1053.11	44.62	1.11515e-05	7.2152e-09	0.0190915	2.67838	2.62724	69.66		3.08274	4.24156	3.43433
	Mountain Jourdanne	51	2.674	3.8777		1050.34	44.26	1.12055e-05	7.2296e-09	0.0190901	2.67783	2.62671	69.13		3.08314	4.24202	3.44089
	Mountain Jourdanne	52	2.674	3.7927		1047.44	43.88	1.1263e-05	7.2448e-09	0.0190894	2.67726	2.62615	68.59		3.08356	4.24251	3.44758
	Mountain Jourdanne	53	2.674	3.7044		1044.46	43.51	1.13195e-05	7.2596e-09	0.0190847	2.6767	2.62562	68.04		3.08398	4.24301	3.45441
	Mountain Jourdanne	54	2.675	3.6147		1041.34	43.13	1.13781e-05	7.2748e-09	0.0190783	2.67613	2.62507	67.48		3.08443	4.24353	3.46137
	Mountain Jourdanne	55	2.675	3.5223		1038.1	42.75	1.14371e-05	7.29e-09	0.0190692	2.67555	2.62453	66.91		3.0849	4.24407	3.46847
	Mountain Jourdanne	56	2.675	3.4252		1034.67	42.36	1.14983e-05	7.3056e-09	0.019057	2.67496	2.62399	66.26		3.08539	4.24464	3.47652
	Mountain Jourdanne	57	2.675	3.3278		1031.12	41.96	1.15616e-05	7.3216e-09	0.0190438	2.67436	2.62343	65.66		3.0859	4.24523	3.48401
	Mountain Jourdanne	58	2.675	3.2249		1027.33	41.57	1.16238e-05	7.3372e-09	0.0190224	2.67377	2.62291	64.97		3.08644	4.24586	3.49258
	Mountain Jourdanne	59	2.675	3.1199		1023.39	41.16	1.16899e-05	7.3536e-09	0.0190009	2.67315	2.62236	64.28		3.087	4.24652	3.50118
	Mountain Jourdanne	60	2.675	3.0085		1019.14	40.76	1.17549e-05	7.3696e-09	0.0189696	2.67255	2.62185	63.49		3.08761	4.24722	3.51098
	Mountain Jourdanne	61	2.675	2.897		1014.76	40.35	1.18221e-05	7.386e-09	0.0189366	2.67193	2.62133	62.76		3.08823	4.24795	3.52011
	Mountain Jourdanne	62	2.675	2.7797		1010.07	39.93	1.18916e-05	7.4028e-09	0.0188974	2.67129	2.62081	61.93		3.0889	4.24873	3.53045
	Mountain Jourdanne	63	2.675	2.6587		1005.07	39.52	1.19601e-05	7.4192e-09	0.0188481	2.67068	2.62034	61.08		3.08961	4.24955	3.54106
	Mountain Jourdanne	64	2.674	2.5301		999.666	39.11	1.20292e-05	7.4356e-09	0.018788	2.67006	2.61989	60.11		3.09038	4.25045	3.55313
	Mountain Jourdanne	65	2.673	2.3965		993.881	38.7	1.20988e-05	7.452e-09	0.0187178	2.66944	2.61947	59.11		3.0912	4.2514	3.56561
	Mountain Jourdanne	66	2.672	2.2582		987.657	38.3	1.21674e-05	7.468e-09	0.0186337	2.66883	2.6191	58.05		3.09208	4.25243	3.57885
	Mountain Jourdanne	67	2.671	2.1136		980.926	37.9	1.22365e-05	7.484e-09	0.0185361	2.66823	2.61877	56.93		3.09303	4.25353	3.59286
	Mountain Jourdanne	68	2.669	1.9589		973.477	37.52	1.23028e-05	7.4992e-09	0.0184152	2.66766	2.61853	55.59		3.09408	4.25476	3.60954
	Mountain Jourdanne	69	2.667	1.798		965.337	37.17	1.23642e-05	7.5132e-09	0.0182699	2.66713	2.6184	54.2		3.09523	4.25609	3.6269
	Mountain Jourdanne	70	2.664	1.6286		956.311	36.84	1.24225e-05	7.5264e-09	0.0180972	2.66663	2.61837	52.68		3.0965	4.25756	3.64591
	Mountain Jourdanne	71	2.66	1.4483		946.235	36.57	1.24706e-05	7.5372e-09	0.0178849	2.66622	2.61854	50.84		3.09791	4.2592	3.6688
	Mountain Jourdanne	72	2.655	1.2599		935.002	36.36	1.25081e-05	7.5456e-09	0.0176309	2.6659	2.6189	48.63		3.09948	4.26103	3.69617
	Mountain Jourdanne	73	2.649	1.0551		922.048	36.29	1.25206e-05	7.5484e-09	0.0173058	2.6658	2.61966	47.53		3.10128	4.26313	3.7109
	Starting material: DY30II-1 in segment 28
	Segment 28	1	2.695	10.1155		1241.51	no Pl occuring
	Segment 28	2	2.694	9.7472		1231.92	no Pl occuring
	Segment 28	3	2.693	9.371		1221.86	no Pl occuring
	Segment 28	4	2.693	9.2502		1218.52	79.45	8.13264e-06	5.822e-09	0.0179999	2.73097	2.68181	86.25		3.20358	4.38249	3.36568
	Segment 28	5	2.693	9.224		1217.97	79.27	8.13702e-06	5.8292e-09	0.0180031	2.7307	2.68154	86.17		3.20359	4.3825	3.36664
	Segment 28	6	2.693	9.1842		1217.1	79	8.1438e-06	5.84e-09	0.0180074	2.73029	2.68112	86.04		3.20361	4.38252	3.36818
	Segment 28	7	2.694	9.1488		1216.13	78.73	8.15084e-06	5.8508e-09	0.0180097	2.72988	2.68072	85.92		3.20362	4.38253	3.36961
	Segment 28	8	2.694	9.1059		1215.13	78.45	8.15842e-06	5.862e-09	0.0180127	2.72946	2.68029	85.78		3.20363	4.38255	3.37128
	Segment 28	9	2.695	9.0683		1214.23	78.17	8.16629e-06	5.8732e-09	0.0180179	2.72904	2.67987	85.65		3.20365	4.38256	3.37282
	Segment 28	10	2.695	9.0269		1213.26	77.89	8.17443e-06	5.8844e-09	0.0180218	2.72861	2.67944	85.51		3.20366	4.38258	3.37449
	Segment 28	11	2.696	8.9826		1212.14	77.6	8.18317e-06	5.896e-09	0.0180239	2.72818	2.679	85.37		3.20368	4.3826	3.37615
	Segment 28	12	2.696	8.9427		1211.2	77.31	8.1922e-06	5.9076e-09	0.01803	2.72774	2.67856	85.22		3.20369	4.38262	3.37794
	Segment 28	13	2.697	8.8998		1210.12	77.01	8.20187e-06	5.9196e-09	0.0180343	2.72729	2.6781	85.08		3.20371	4.38263	3.3796
	Segment 28	14	2.697	8.8532		1208.94	76.72	8.21153e-06	5.9312e-09	0.0180358	2.72685	2.67767	84.92		3.20373	4.38265	3.38151
	Segment 28	15	2.698	8.8117		1207.88	76.41	8.22218e-06	5.9436e-09	0.0180421	2.72638	2.67719	84.77		3.20374	4.38267	3.38329
	Segment 28	16	2.698	8.7629		1206.66	76.11	8.23282e-06	5.9556e-09	0.0180444	2.72593	2.67674	84.61		3.20376	4.38269	3.3852
	Segment 28	17	2.699	8.7192		1205.53	75.79	8.24452e-06	5.9684e-09	0.0180508	2.72544	2.67625	84.45		3.20378	4.38271	3.3871
	Segment 28	18	2.699	8.6717		1204.3	75.48	8.25621e-06	5.9808e-09	0.0180544	2.72497	2.67578	84.29		3.20379	4.38273	3.389
	Segment 28	19	2.7	8.6213		1203.08	75.16	8.26865e-06	5.9936e-09	0.0180594	2.72449	2.67529	84.11		3.20381	4.38275	3.39115
	Segment 28	20	2.701	8.5716		1201.78	74.84	8.28145e-06	6.0064e-09	0.0180632	2.72401	2.6748	83.94		3.20383	4.38278	3.39317
	Segment 28	21	2.701	8.5189		1200.35	74.51	8.29503e-06	6.0196e-09	0.0180652	2.72351	2.67431	83.76		3.20385	4.3828	3.39531
	Segment 28	22	2.702	8.4669		1198.97	74.18	8.30901e-06	6.0328e-09	0.0180689	2.72301	2.67381	83.57		3.20387	4.38282	3.39757
	Segment 28	23	2.702	8.4164		1197.64	73.84	8.32382e-06	6.0464e-09	0.0180751	2.7225	2.67329	83.39		3.20389	4.38284	3.39971
	Segment 28	24	2.703	8.3621		1196.18	73.5	8.33905e-06	6.06e-09	0.0180788	2.72199	2.67277	83.2		3.20391	4.38287	3.40197
	Segment 28	25	2.704	8.3048		1194.61	73.16	8.35469e-06	6.0736e-09	0.0180803	2.72147	2.67227	82.99		3.20393	4.38289	3.40447
	Segment 28	26	2.704	8.249		1193.12	72.81	8.37123e-06	6.0876e-09	0.0180852	2.72094	2.67173	82.79		3.20395	4.38292	3.40685
	Segment 28	27	2.705	8.1894		1191.44	72.45	8.3887e-06	6.102e-09	0.0180871	2.7204	2.6712	82.58		3.20397	4.38294	3.40935
	Segment 28	28	2.706	8.1313		1189.86	72.09	8.40664e-06	6.1164e-09	0.018092	2.71986	2.67065	82.36		3.204	4.38297	3.41197
	Segment 28	29	2.707	8.0701		1188.14	71.72	8.42557e-06	6.1312e-09	0.0180951	2.7193	2.67009	82.14		3.20402	4.383	3.41459
	Segment 28	30	2.708	8.0061		1186.29	71.35	8.44498e-06	6.146e-09	0.0180956	2.71874	2.66954	81.91		3.20404	4.38303	3.41732
	Segment 28	31	2.708	7.9433		1184.51	70.97	8.46543e-06	6.1612e-09	0.0180992	2.71816	2.66897	81.67		3.20407	4.38306	3.42018
	Segment 28	32	2.709	7.8776		1182.58	70.59	8.48641e-06	6.1764e-09	0.0181001	2.71759	2.6684	81.43		3.2041	4.38309	3.42303
	Segment 28	33	2.71	7.8089		1180.6	70.2	8.50847e-06	6.192e-09	0.0181013	2.717	2.66782	81.18		3.20412	4.38312	3.42601
	Segment 28	34	2.711	7.7373		1178.57	69.8	8.53167e-06	6.208e-09	0.0181029	2.7164	2.66722	80.91		3.20415	4.38315	3.42922
	Segment 28	35	2.712	7.667		1176.4	69.4	8.55545e-06	6.224e-09	0.0181021	2.71579	2.66663	80.65		3.20418	4.38318	3.43232
	Segment 28	36	2.713	7.5895		1174.13	68.99	8.58042e-06	6.2404e-09	0.0181004	2.71517	2.66603	80.36		3.20421	4.38322	3.43577
	Segment 28	37	2.714	7.5139		1171.89	68.58	8.60599e-06	6.2568e-09	0.0181	2.71456	2.66542	80.08		3.20424	4.38325	3.4391
	Segment 28	38	2.715	7.4354		1169.46	68.16	8.63281e-06	6.2736e-09	0.018097	2.71392	2.66481	79.78		3.20427	4.38329	3.44267
	Segment 28	39	2.716	7.3505		1166.85	67.73	8.66094e-06	6.2908e-09	0.0180917	2.71327	2.66418	79.46		3.2043	4.38333	3.44648
	Segment 28	40	2.717	7.2668		1164.32	67.3	8.68972e-06	6.308e-09	0.0180885	2.71262	2.66356	79.14		3.20434	4.38337	3.45028
	Segment 28	41	2.718	7.1801		1161.57	66.86	8.71987e-06	6.3256e-09	0.018082	2.71196	2.66292	78.81		3.20437	4.38341	3.45421
	Segment 28	42	2.719	7.0877		1158.6	66.41	8.75142e-06	6.3436e-09	0.0180725	2.71128	2.66228	78.45		3.20441	4.38346	3.45849
	Segment 28	43	2.719	7.0385		1157.06	66.17	8.76854e-06	6.3532e-09	0.0180686	2.71092	2.66193	78.26		3.20443	4.38348	3.46076
	Segment 28	44	2.72	7.0157		1156.54	66.03	8.77863e-06	6.3588e-09	0.0180751	2.71071	2.66171	78.14		3.20444	4.38349	3.46218
	Segment 28	45	2.721	6.9654		1155.38	65.73	8.80048e-06	6.3708e-09	0.0180883	2.71025	2.66123	77.84		3.20447	4.38353	3.46575
	Segment 28	46	2.722	6.9127		1154.2	65.42	8.8234e-06	6.3832e-09	0.0181025	2.70978	2.66073	77.52		3.20451	4.38357	3.46956
	Segment 28	47	2.724	6.8599		1152.96	65.1	8.84742e-06	6.396e-09	0.018117	2.7093	2.66022	77.21		3.20454	4.38361	3.47325
	Segment 28	48	2.725	6.8022		1151.68	64.78	8.87181e-06	6.4088e-09	0.018131	2.70882	2.6597	76.84		3.20458	4.38365	3.47765
	Segment 28	49	2.726	6.7461		1150.37	64.46	8.89656e-06	6.4216e-09	0.0181446	2.70833	2.65919	76.51		3.20461	4.3837	3.48158
	Segment 28	50	2.728	6.6867		1149	64.13	8.92248e-06	6.4348e-09	0.0181585	2.70784	2.65867	76.13		3.20466	4.38374	3.4861
	Segment 28	51	2.729	6.6278		1147.61	63.79	8.9496e-06	6.4484e-09	0.0181736	2.70732	2.65812	75.79		3.20469	4.38378	3.49015
	Segment 28	52	2.73	6.5647		1146.14	63.44	8.97794e-06	6.4624e-09	0.0181885	2.70679	2.65756	75.4		3.20473	4.38383	3.49479
	Segment 28	53	2.732	6.5014		1144.61	63.09	9.00673e-06	6.4764e-09	0.0182022	2.70627	2.65701	74.99		3.20478	4.38388	3.49967
	Segment 28	54	2.733	6.4354		1143.04	62.73	9.0368e-06	6.4908e-09	0.0182172	2.70572	2.65643	74.59		3.20482	4.38393	3.50443
	Segment 28	55	2.735	6.3667		1141.44	62.37	9.06733e-06	6.5052e-09	0.0182315	2.70518	2.65586	74.17		3.20486	4.38398	3.50943
	Segment 28	56	2.736	6.2962		1139.72	61.99	9.10007e-06	6.5204e-09	0.0182464	2.7046	2.65526	73.7		3.20491	4.38404	3.51502
	Segment 28	57	2.738	6.2241		1137.98	61.61	9.13333e-06	6.5356e-09	0.0182611	2.70403	2.65465	73.26		3.20496	4.3841	3.52026
	Segment 28	58	2.74	6.1477		1136.17	61.23	9.1671e-06	6.5508e-09	0.0182744	2.70346	2.65405	72.77		3.20501	4.38416	3.52609
	Segment 28	59	2.742	6.0691		1134.25	60.83	9.20322e-06	6.5668e-09	0.0182886	2.70285	2.65342	72.26		3.20506	4.38422	3.53216
	Segment 28	60	2.743	5.9898		1132.26	60.42	9.24084e-06	6.5832e-09	0.0183032	2.70223	2.65277	71.74		3.20512	4.38428	3.53835
	Segment 28	61	2.745	5.9066		1130.2	60.01	9.27906e-06	6.5996e-09	0.0183165	2.70162	2.65213	71.21		3.20517	4.38435	3.54466
	Segment 28	62	2.747	5.8202		1128.04	59.59	9.31884e-06	6.6164e-09	0.0183292	2.70098	2.65147	70.68		3.20523	4.38441	3.55097
	Segment 28	63	2.749	5.73		1125.77	59.15	9.3612e-06	6.634e-09	0.0183429	2.70032	2.65078	70.07		3.20529	4.38449	3.55823
	Segment 28	64	2.751	5.6365		1123.38	58.71	9.40426e-06	6.6516e-09	0.0183543	2.69965	2.6501	69.46		3.20536	4.38457	3.56549
	Segment 28	65	2.753	5.5402		1120.9	58.25	9.45001e-06	6.67e-09	0.0183668	2.69896	2.64939	68.82		3.20543	4.38464	3.57311
	Segment 28	66	2.756	5.4411		1118.27	57.79	9.49653e-06	6.6884e-09	0.0183765	2.69826	2.64868	68.18		3.20549	4.38472	3.58072
	Segment 28	67	2.758	5.3357		1115.49	57.31	9.54588e-06	6.7076e-09	0.0183862	2.69754	2.64794	67.47		3.20557	4.38481	3.58918
	Segment 28	68	2.76	5.226		1112.6	56.83	9.59607e-06	6.7268e-09	0.0183936	2.69681	2.64721	66.74		3.20564	4.3849	3.59786
	Segment 28	69	2.762	5.113		1109.51	56.32	9.6503e-06	6.7472e-09	0.0184015	2.69604	2.64643	66		3.20572	4.38499	3.60667
	Segment 28	70	2.765	4.9934		1106.22	55.81	9.70546e-06	6.7676e-09	0.0184053	2.69527	2.64567	65.19		3.20581	4.38509	3.61632
	Segment 28	71	2.767	4.8668		1102.68	55.29	9.76267e-06	6.7884e-09	0.018405	2.69449	2.6449	64.3		3.2059	4.3852	3.62691
	Segment 28	72	2.77	4.7381		1099.01	54.75	9.82311e-06	6.81e-09	0.0184055	2.69367	2.64409	63.47		3.20599	4.3853	3.63679
	Segment 28	73	2.772	4.599		1095.01	54.2	9.88575e-06	6.832e-09	0.0184	2.69284	2.64329	62.51		3.20609	4.38542	3.64822
	Segment 28	74	2.775	4.4561		1090.72	53.62	9.95299e-06	6.8552e-09	0.0183929	2.69197	2.64245	61.55		3.20619	4.38554	3.65965
	Segment 28	75	2.777	4.3013		1086.07	53.05	1.00202e-05	6.878e-09	0.0183758	2.69111	2.64165	60.47		3.2063	4.38567	3.67251
	Segment 28	76	2.78	4.1419		1081.03	52.45	1.00923e-05	6.902e-09	0.018355	2.6902	2.64082	59.41		3.20641	4.3858	3.68513
	Segment 28	77	2.782	3.9682		1075.44	51.85	1.01657e-05	6.926e-09	0.0183208	2.68929	2.64002	58.19		3.20654	4.38595	3.69965
	Segment 28	78	2.784	3.7856		1069.35	51.23	1.02428e-05	6.9508e-09	0.0182781	2.68836	2.63922	56.97		3.20667	4.3861	3.71418
	Segment 28	79	2.787	3.5902		1062.56	50.6	1.03226e-05	6.976e-09	0.0182202	2.68741	2.63844	55.69		3.2068	4.38626	3.72942
	Segment 28	80	2.788	3.3778		1054.82	49.97	1.04039e-05	7.0012e-09	0.018139	2.68645	2.63773	54.29		3.20695	4.38643	3.74609
	Segment 28	81	2.79	3.147		1045.91	49.34	1.04866e-05	7.0264e-09	0.0180291	2.6855	2.63709	52.78		3.20711	4.38661	3.76407
	Segment 28	82	2.791	2.8906		1035.41	48.73	1.0568e-05	7.0508e-09	0.0178764	2.68458	2.63659	51.15		3.20728	4.38681	3.78348
	Segment 28	83	2.79	2.6023		1022.59	48.18	1.06426e-05	7.0728e-09	0.0176557	2.68375	2.63637	49.39		3.20746	4.38703	3.80444
	Segment 28	84	2.788	2.2662		1006.19	47.76	1.07002e-05	7.0896e-09	0.0173245	2.68312	2.63663	47.41		3.20767	4.38727	3.82802
	Segment 28	85	2.781	1.8496		983.249	47.66	1.07141e-05	7.0936e-09	0.0167804	2.68297	2.63795	44.97		3.20792	4.38757	3.85708
	Segment 28	86	2.771	1.3589		950.545	47.7	1.07085e-05	7.092e-09	0.0159865	2.68303	2.64013	41.87		3.20825	4.38795	3.89401

## Sheet: 2Density of melt
	Supplemental Table S13. (part 2) Results of the melt density to the studied PUBs
									Melt compositions along olivine control line based on PRIMELT3 software (Herzberg and Asimow, 2015)
	Data source	longitude（°E）	latitude（°S）	Deepth (m)	Zone	Sample or spot	Type	Sample	SiO2	TiO2	Al2O3	Cr2O3	Fe2O3	FeO	MnO	MgO	CaO	Na2O	K2O	NiO	P2O5	H2O	liquid density-1kbar	liquid density-4kbar	Na8.0	XliqAlO1.5*XCaOliq/XliqNaO0.5*XliqSiO2	An(Kd=0.16)	An(Kd=0.38)	An(Kd=0.27)	H2O-8.0	Fe8.0	0.5Al2O3*CaO/0.5Na2OSiO2		K2O/TiO2	CaO-excess	An-MEP-	Di-MEP-	En-MEP-	An-MEP-normalized	Di-MEP-normalized	En-MEP-normalized	MEP-kbar
	This study	50.4853	37.697	1549	Segment 27	277	basaltic glass-EMPA	277	49.7666	1.02135	15.8625	0.0451284	0.956494	7.7476	0.213278	8.40671	13.5095	2.43074	0.0394454	0.000597475	0	0.727371	2.699	2.694	2.52029	1.15385	0.878221	0.752258	0.697986	0.727371	9.12985	1.15385	1.15146	0.0386209
	This study	50.4853	37.697	1549	Segment 27	34TVG-6MI	MI in Pl-EMPA	34TVG-6MI	49.7894	1.02181	15.8698	0	0.956932	7.75115	0.213376	8.41055	13.5157	2.43185	0.0394634	0	0	0.265646	2.695	2.69	2.52237	1.15385	0.878221	0.752258	0.697986	0.265646	9.13974	1.15385	1.15146	0.0386209
	(a)	51.56	37.43	1900-2700	segment 27	1-D-MI4	MI in Pl-EMPA	1-D-MI4	49.3002	0.527027	16.7431	0	1.0192	8.2555	0.219359	8.59897	13.3108	1.94359	0.0548399	0	0.0274199	0.0288367	2.698	2.695	1.94359	1.51496	0.904475	0.799468	0.704159	0.0288367	9.17258	1.51496	1.51181	0.104055
	(a)	51.56	37.43	1900-2700	segment 27	2-A-MI1	MI in Pl-EMPA	2-A-MI1	50.3023	1.00627	16.2858	0	0.932089	7.54992	0.137229	8.56194	12.5156	2.52098	0.108579	0	0.0793061	0.497168	2.684	2.682	2.52098	1.04694	0.867433	0.733695	0.695374	0.497168	8.38862	1.04694	1.04476	0.107902
	(a)	51.56	37.43	1900-2700	segment 27	2-A-MI10	MI in Pl-EMPA	2-A-MI10	50.23	0.711799	16.4313	0	0.94466	7.65174	0.167936	8.39754	12.4017	2.91541	0.0493034	0	0.0986068	0.430186	2.681	2.678	3.02989	0.906374	0.849959	0.704596	0.691047	0.430186	8.99853	0.906374	0.904493	0.0692659
	(a)	51.56	37.43	1900-2700	segment 27	2-A-MI2	MI in Pl-EMPA	2-A-MI2	50.7039	0.384024	16.5579	0	0.957004	7.75173	0.140062	8.65888	12.1008	2.65303	0.0809812	0	0.0117143	0.318166	2.675	2.673	2.65303	0.97018	0.85843	0.718556	0.69316	0.318166	8.61286	0.97018	0.968166	0.210875
	(a)	51.56	37.43	1900-2700	segment 27	2-A-MI3	MI in Pl-EMPA	2-A-MI3	51.2704	0.572506	16.5211	0	0.945758	7.66064	0.155001	8.44398	11.9188	2.4078	0.0656007	0	0.0384451	0.23541	2.672	2.669	2.50464	1.03896	0.866551	0.732199	0.695159	0.23541	9.07494	1.03896	1.03681	0.114585	-0.0480186	0.1692	0.0914339	0.169857	39.304	21.2394	39.4566	4.36212
	(a)	51.56	37.43	1900-2700	segment 27	2-A-MI4	MI in Pl-EMPA	2-A-MI4	51.1973	0.359431	16.0395	0	0.943481	7.6422	0.197554	8.78925	11.9665	2.77026	0.0650995	0	0.0294229	0.419575	2.67	2.668	2.77026	0.881466	0.84637	0.698763	0.690143	0.419575	8.49115	0.881466	0.879636	0.181118
	(a)	51.56	37.43	1900-2700	segment 27	2-A-MI5	MI in Pl-EMPA	2-A-MI5	51.5402	0.447264	16.5067	0	0.945564	7.65907	0.161387	8.70039	11.9658	1.99715	0.0737945	0	0.00265742	0.104006	2.671	2.668	1.99715	1.24986	0.886513	0.766851	0.699964	0.104006	8.5099	1.24986	1.24726	0.164991
	(a)	51.56	37.43	1900-2700	segment 27	2-A-MI6	MI in Pl-EMPA	2-A-MI6	51.4553	0.352354	16.2822	0	0.921362	7.46303	0.257012	8.90644	12.1306	2.13114	0.0715575	0	0.0290126	0.349705	2.672	2.669	2.13114	1.1732	0.879988	0.755343	0.69841	0.349705	8.29209	1.1732	1.17076	0.203084
	(a)	51.56	37.43	1900-2700	segment 27	2-A-MI7	MI in Pl-EMPA	2-A-MI7	50.3806	0.775807	16.8834	0	0.872909	7.07056	0.250607	8.75016	12.6195	2.20067	0.115068	0	0.0807443	0.655587	2.681	2.678	2.20067	1.2517	0.886661	0.767114	0.699999	0.655587	7.85602	1.2517	1.2491	0.148321
	(a)	51.56	37.43	1900-2700	segment 27	2-A-MI8	MI in Pl-EMPA	2-A-MI8	51.2935	0.32965	16.6817	0	0.925757	7.49863	0.186904	8.55569	12.3589	2.06642	0.082361	0	0.0205389	0.340901	2.675	2.671	2.06642	1.26694	0.887872	0.769269	0.700285	0.340901	8.33164	1.26694	1.26431	0.249844
	(a)	51.56	37.43	1900-2700	segment 27	2-A-MI9	MI in Pl-EMPA	2-A-MI9	51.3256	0.402147	16.3859	0	0.938892	7.60503	0.17002	8.74592	12.2916	2.05819	0.0738679	0	0.00288869	0.259518	2.675	2.672	2.05819	1.24186	0.885866	0.765702	0.69981	0.259518	8.44986	1.24186	1.23928	0.183684
	(a)	51.56	37.43	1900-2700	segment 27	2-E-2-MI3	MI in Pl-EMPA	2-E-2-MI3	51.9376	1.0109	15.3079	0	0.962762	7.79837	0.134099	8.04594	12.0173	2.56851	0.134099	0	0.0825224	0.0784897	2.668	2.663	2.57898	0.898208	0.848801	0.702709	0.690755	0.0784897	8.71887	0.898208	0.896343	0.132653	-0.068889	0.162789	0.109864	0.178335	36.096	24.3608	39.5432	1.47141
	(a)	51.56	37.43	1900-2700	segment 27	2-E-3-MI1	MI in Pl-EMPA	2-E-3-MI1	52.3584	0.480016	15.6416	0	0.939543	7.6103	0.117531	8.58262	11.0932	3.07875	0.0686586	0	0.0293827	0.336691	2.654	2.651	3.07875	0.701121	0.814196	0.648513	0.681794	0.336691	8.45571	0.701121	0.699665	0.143034	-0.832006	0.159417	0.0962612	0.180722	36.5299	22.058	41.4121	2.69278
	(a)	51.56	37.43	1900-2700	segment 27	2-E-3-MI3	MI in Pl-EMPA	2-E-3-MI3	52.6787	0.401489	15.9402	0	0.878569	7.11641	0.205486	8.21843	11.31	3.13293	0.088368	0	0.0293551	0.590366	2.647	2.645	3.20079	0.71152	0.816413	0.651862	0.682384	0.590366	8.13263	0.71152	0.710043	0.220101	-0.724476	0.161363	0.0986996	0.183257	36.3988	22.2637	41.3375	2.53982
	(a)	51.56	37.43	1900-2700	segment 27	3-A-MI1	MI in Pl-EMPA	3-A-MI1	50.9866	0.56392	15.8092	0	0.940046	7.61437	0.234629	8.65823	11.9568	3.16709	0.0396443	0	0.0295309	0.479007	2.669	2.667	3.16709	0.762471	0.826553	0.667387	0.685053	0.479007	8.46023	0.762471	0.760888	0.0703013
	(a)	51.56	37.43	1900-2700	segment 27	3-A-MI2	MI in Pl-EMPA	3-A-MI2	51.0788	0.567859	16.0858	0	0.902075	7.30681	0.148279	8.68938	12.011	3.14033	0.0594745	0	0.010184	0.569077	2.665	2.663	3.14033	0.784551	0.830607	0.673694	0.686108	0.569077	8.1185	0.784551	0.782922	0.104735
	(a)	51.56	37.43	1900-2700	segment 27	3-A-MI3	MI in Pl-EMPA	3-A-MI3	50.5604	0.534056	16.1735	0	0.96754	7.83708	0.183215	8.6036	12.0124	3.05027	0.0487898	0	0.0291524	0.358952	2.675	2.673	3.05027	0.820543	0.836825	0.683477	0.687712	0.358952	8.70768	0.820543	0.818839	0.0913571
	(a)	51.56	37.43	1900-2700	segment 27	3-A-MI4	MI in Pl-EMPA	3-A-MI4	50.9491	0.643104	16.1754	0	0.911006	7.37915	0.138247	8.52215	12.2804	2.9124	0.0593949	0	0.0296975	0.498473	2.671	2.668	2.9124	0.87196	0.844955	0.696476	0.689785	0.498473	8.19889	0.87196	0.870149	0.0923567
	(a)	51.56	37.43	1900-2700	segment 27	3-A-MI5	MI in Pl-EMPA	3-A-MI5	51.8066	0.481405	16.0229	0	0.902915	7.31361	0.242219	8.82002	11.8015	2.50159	0.0682664	0	0.0389372	0.525446	2.665	2.662	2.50159	0.950371	0.855904	0.714365	0.692533	0.525446	8.12607	0.950371	0.948398	0.141807	-0.0524946	0.163174	0.0958269	0.177143	37.4128	21.9714	40.6158	3.1613
	(a)	51.56	37.43	1900-2700	segment 27	3-A-MI6	MI in Pl-EMPA	3-A-MI6	51.2056	0.363951	16.2619	0	0.944504	7.65048	0.114719	8.6092	11.7523	3.01138	0.048069	0	0.0379705	0.330406	2.666	2.663	3.01138	0.807281	0.834588	0.679941	0.687137	0.330406	8.50036	0.807281	0.805605	0.132075	-0.164977	0.164048	0.100187	0.144161	40.1688	24.5319	35.2993	3.41978
	(a)	51.56	37.43	1900-2700	segment 27	3-A-MI7	MI in Pl-EMPA	3-A-MI7	50.535	0.712368	16.5917	0	0.919554	7.44839	0.118309	8.35989	12.1628	3.01507	0.0588526	0	0.0780678	0.568141	2.674	2.671	3.12317	0.862682	0.843549	0.69421	0.689428	0.568141	8.69856	0.862682	0.860891	0.0826154
	(a)	51.56	37.43	1900-2700	segment 27	3-B-MI1	MI in Pl-EMPA	3-B-MI1	50.5855	1.00617	16.3986	0	0.93792	7.59715	0.14995	8.37768	12.1803	2.51603	0.140603	0	0.110126	0.426597	2.681	2.678	2.60337	1.0222	0.86466	0.728998	0.694696	0.426597	8.90416	1.0222	1.02008	0.139742
	(a)	51.56	37.43	1900-2700	segment 27	3-C-MI2	MI in Pl-EMPA	3-C-MI2	50.7266	1.08323	15.0938	0	1.02544	8.30605	0.246354	8.13226	11.6594	3.19587	0.442505	0	0.088501	0.099444	2.674	2.671	3.23761	0.707074	0.815471	0.650438	0.682134	0.099444	9.40755	0.707074	0.705606	0.408505	-0.400961	0.161594	0.125525	0.122829	39.4182	30.6197	29.9621	0.375586
	(a)	51.56	37.43	1900-2700	segment 27	4-A-MI1	MI in Pl-EMPA	4-A-MI1	52.3889	0.942033	15.8229	0	0.809913	6.5603	0.184511	8.45267	12.1603	2.45605	0.119932	0	0.102506	0.743939	2.657	2.653	2.558	0.974024	0.858909	0.719355	0.693279	0.743939	7.70878	0.974024	0.972002	0.127312
	(a)	51.56	37.43	1900-2700	segment 27	4-A-MI2	MI in Pl-EMPA	4-A-MI2	52.0012	1.39193	15.8665	0	0.779565	6.31448	0.243279	8.36182	12.5253	2.30243	0.111888	0	0.101623	0.727901	2.662	2.658	2.37511	1.08115	0.871087	0.739931	0.696264	0.727901	7.31588	1.08115	1.07891	0.0803835
	(a)	51.56	37.43	1900-2700	segment 27	5-A-MI1	MI in Pl-EMPA	5-A-MI1	50.6043	0.594234	15.6652	0	0.990218	8.02077	0.22748	8.6556	12.3587	2.68953	0.129989	0	0.0639627	0.173683	2.681	2.678	2.68953	0.926535	0.852743	0.709154	0.691744	0.173683	8.91178	0.926535	0.924611	0.21875
	(a)	51.56	37.43	1900-2700	segment 27	5-A-MI10	MI in Pl-EMPA	5-A-MI10	50.9143	0.357367	16.3713	0	0.896078	7.25823	0.137543	8.31113	13.1472	2.52613	0.0687716	0	0.0118713	0.56701	2.676	2.671	2.59785	1.09003	0.872003	0.741502	0.696486	0.56701	8.40734	1.09003	1.08777	0.19244
	(a)	51.56	37.43	1900-2700	segment 27	5-A-MI11	MI in Pl-EMPA	5-A-MI11	50.2358	0.482132	16.1494	0	0.963247	7.8023	0.150533	8.34118	13.1524	2.62287	0.0531292	0	0.0469206	0.302682	2.686	2.682	2.70645	1.05	0.867769	0.734266	0.695456	0.302682	9.10443	1.05	1.04782	0.110196
	(a)	51.56	37.43	1900-2700	segment 27	5-A-MI13	MI in Pl-EMPA	5-A-MI13	51.2193	0.433429	15.6093	0	0.944358	7.6493	0.187871	8.41829	13.0824	2.39049	0.0626236	0	0.00267358	0.251194	2.678	2.672	2.48038	1.08634	0.871624	0.740851	0.696394	0.251194	9.02447	1.08634	1.08408	0.144484
	(a)	51.56	37.43	1900-2700	segment 27	5-A-MI2	MI in Pl-EMPA	5-A-MI2	51.0051	0.500442	15.3448	0	0.989626	8.01597	0.15658	8.41131	12.9675	2.55133	0.0552635	0	0.0020468	0.104916	2.68	2.675	2.64894	0.995985	0.86159	0.723834	0.693941	0.104916	9.46878	0.995985	0.993917	0.110429
	(a)	51.56	37.43	1900-2700	segment 27	5-A-MI3	MI in Pl-EMPA	5-A-MI3	51.1048	0.458998	15.9588	0	0.933823	7.56397	0.187353	8.34155	13.0641	2.32145	0.0535293	0	0.0115878	0.279043	2.678	2.673	2.39077	1.14466	0.877363	0.750764	0.69778	0.279043	8.81541	1.14466	1.14228	0.116622
	(a)	51.56	37.43	1900-2700	segment 27	5-A-MI4	MI in Pl-EMPA	5-A-MI4	51.0632	0.35813	15.962	0	0.971024	7.8653	0.203642	8.28726	12.9918	2.22419	0.0708321	0	0.00264603	0.158627	2.681	2.675	2.27819	1.1893	0.88142	0.757854	0.698752	0.158627	9.10569	1.1893	1.18683	0.197783
	(a)	51.56	37.43	1900-2700	segment 27	5-A-MI5	MI in Pl-EMPA	5-A-MI5	51.0659	0.365104	15.8538	0	0.979752	7.93599	0.220216	8.35931	12.9252	2.2128	0.0616606	0	0.0202498	0.129493	2.682	2.676	2.28045	1.18118	0.880702	0.756594	0.698581	0.129493	9.29305	1.18118	1.17872	0.168885
	(a)	51.56	37.43	1900-2700	segment 27	5-A-MI6	MI in Pl-EMPA	5-A-MI6	50.9298	0.454965	15.9866	0	0.959024	7.7681	0.16802	8.56891	12.967	2.03575	0.159177	0	0.00264278	0.183532	2.682	2.677	2.03575	1.30231	0.890584	0.77412	0.700925	0.183532	8.63104	1.30231	1.2996	0.349866
	(a)	51.56	37.43	1900-2700	segment 27	5-A-MI7	MI in Pl-EMPA	5-A-MI7	50.3247	0.522231	16.4964	0	0.919992	7.45194	0.172029	8.57688	13.152	2.2159	0.0983024	0	0.0696309	0.485245	2.686	2.682	2.2159	1.26726	0.887897	0.769314	0.700291	0.485245	8.27976	1.26726	1.26463	0.188235
	(a)	51.56	37.43	1900-2700	segment 27	5-A-MI8	MI in Pl-EMPA	5-A-MI8	51.2062	0.35017	16.1927	0	0.927124	7.5097	0.129599	8.52352	12.9238	2.15642	0.0604793	0	0.0203292	0.351741	2.678	2.673	2.15642	1.23444	0.885258	0.764624	0.699666	0.351741	8.34394	1.23444	1.23188	0.172714
	(a)	51.56	37.43	1900-2700	segment 27	5-A-MI9	MI in Pl-EMPA	5-A-MI9	50.6486	0.348356	16.2291	0	0.946196	7.66419	0.249259	8.27308	12.9943	2.55781	0.0687611	0	0.0202239	0.331095	2.68	2.676	2.62162	1.0603	0.868885	0.736166	0.695729	0.331095	8.84645	1.0603	1.0581	0.197388
	(a)	51.56	37.43	1900-2700	segment 27	5-B-1-MI1	MI in Pl-EMPA	5-B-1-MI1	50.9019	0.766768	16.3744	0	0.950585	7.69973	0.159475	8.4864	12.2087	2.24594	0.134104	0	0.0720858	0.216468	2.679	2.676	2.34147	1.13898	0.876827	0.749833	0.697651	0.216468	9.18565	1.13898	1.13662	0.174895
	(a)	51.56	37.43	1900-2700	segment 27	5-B-1-MI1	MI in Pl-EMPA	5-B-1-MI1	50.7913	0.851334	16.3519	0	0.954027	7.72762	0.187115	8.32096	12.2872	2.33894	0.125959	0	0.0635868	0.303438	2.681	2.677	2.40468	1.10162	0.873179	0.743524	0.696771	0.303438	8.98616	1.10162	1.09933	0.147954
	(a)	51.56	37.43	1900-2700	segment 27	5-B-1-MI2	MI in Pl-EMPA	5-B-1-MI2	50.9434	0.746951	16.3904	0	0.968572	7.84543	0.0449232	8.26996	12.3935	2.28414	0.0551331	0	0.0575834	0.146936	2.679	2.676	2.33701	1.13708	0.876646	0.749518	0.697608	0.146936	9.05835	1.13708	1.13472	0.0738108
	(a)	51.56	37.43	1900-2700	segment 27	5-B-1-MI2	MI in Pl-EMPA	5-B-1-MI2	51.0212	0.627462	16.0969	0	0.936607	7.58652	0.16998	8.50307	12.3585	2.60541	0.0638442	0	0.0304988	0.374255	2.675	2.672	2.60541	0.974757	0.859001	0.719507	0.693301	0.374255	8.42929	0.974757	0.972733	0.10175
	(a)	51.56	37.43	1900-2700	segment 27	5-B-1-MI3	MI in Pl-EMPA	5-B-1-MI3	50.74	0.674103	16.0835	0	0.995571	8.06412	0.141662	8.52388	12.1113	2.54187	0.0619772	0	0.0619772	0.046573	2.678	2.676	2.54187	0.983747	0.860109	0.721356	0.693575	0.046573	8.95995	0.983747	0.981705	0.0919403
	(a)	51.56	37.43	1900-2700	segment 27	5-B-2-MI1	MI in Pl-EMPA	5-B-2-MI1	50.1917	0.759681	16.5345	0	0.899456	7.28559	0.0869941	8.69435	12.8895	2.53072	0.062312	0	0.0651444	0.555872	2.683	2.68	2.53072	1.09287	0.872293	0.742	0.696557	0.555872	8.09493	1.09287	1.0906	0.082024
	(a)	51.56	37.43	1900-2700	segment 27	5-B-2-MI5	MI in Pl-EMPA	5-B-2-MI5	50.4378	0.830284	16.9258	0	0.894104	7.24224	0.198994	8.476	12.7574	2.12273	0.0843604	0	0.0302729	0.503664	2.683	2.679	2.20776	1.31363	0.891425	0.77563	0.701123	0.503664	8.59338	1.31363	1.31091	0.101604
	(a)	51.56	37.43	1900-2700	segment 27	5-B-3-MI6	MI in Pl-EMPA	5-B-3-MI6	50.0203	0.459649	17.0293	0	0.833757	6.75343	0.135012	8.73881	13.6234	2.34616	0.0166481	0	0.0434474	0.711146	2.682	2.678	2.34616	1.28764	0.889475	0.772133	0.700664	0.711146	7.50366	1.28764	1.28497	0.0362191
	(a)	51.56	37.43	1900-2700	segment 27	5-E-MI1	MI in Pl-EMPA	5-E-MI1	49.554	0.540263	17.3027	0	0.880561	7.13254	0.137058	8.63823	13.2121	2.53398	0.0251007	0	0.0434282	0.688914	2.687	2.684	2.53398	1.18583	0.881114	0.757318	0.698679	0.688914	7.92488	1.18583	1.18337	0.0464602
	(a)	51.56	37.43	1900-2700	segment 27	5-F-MI2	MI in Pl-EMPA	5-F-MI2	49.8572	0.83824	16.2706	0	1.00216	8.11749	0.14097	8.17996	12.6011	2.89542	0.0352426	0	0.0616745	0.0449062	2.683	2.68	2.94522	0.925096	0.852548	0.708834	0.691695	0.0449062	9.25571	0.925096	0.923175	0.0420435
	This study	49.6647	37.8112	2398	WR-28	DY30II-1	basaltic glass-XRF	DY30II-1	49.6083	1.17148	18.8811	0	0.978216	7.92355	0.148582	6.08481	12.2707	2.69874	0.131399	0	0.103098	1.06396	2.681	2.678	2.32641	1.12719	0.875698	0.747875	0.697379	0.668117	7.24842	1.12719	1.12485	0.112166	-0.403871	0.199843	0.0813523	0.132306	48.3295	19.674	31.9964	8.77218
	This study	49.6872	37.7386	2946	WR-28	30IV-TVG04	basaltic glass-XRF	30IV-TVG04	49.7349	1.23731	18.3675	0	1.0046	8.13723	0.153653	6.23708	12.1102	2.70914	0.202174	0	0.106142	1.12777	2.684	2.682	2.35881	1.0753	0.870476	0.738885	0.696116	0.738572	7.49905	1.0753	1.07306	0.163399	-0.518632	0.19563	0.0859498	0.134888	46.9737	20.6378	32.3885	7.91168
	This study	49.6647	37.8112	2398	Segment 28-MI-OL	DY30IV-1	MI in Ol-EMPA	DY30IV-1	49.9508	0.675929	16.1123	0.0359962	0.888857	7.19974	0.133986	8.71009	13.7426	2.33476	0.0389959	0	0.175982	0.546035	2.692	2.687	2.33476	1.23668	0.885443	0.764951	0.69971	0.546035	7.99955	1.23668	1.23411	0.0576923
	This study	49.6872	37.7386	2946	Segment 28	282	MI in Pl-EMPA	282	49.1057	0.899022	16.3009	0.0687509	0.844213	6.83813	0.218746	9.43364	14.2077	2.04598	0.0190822	0.0181031	0	0.235797	2.696	2.692	2.04598	1.50147	0.9037	0.79803	0.703981	0.235797	7.59776	1.50147	1.49835	0.0212255
	(b)	49.6561	37.7889		Segment 28	Dy115-D13	glass-XRF	Dy115-D13	50.5151	0.974357	18.3462	0	0.839899	6.80318	0.171648	6.90632	12.5556	2.499	0.287763	0	0.10097	0.62411	2.661	2.658	2.29146	1.18853	0.881352	0.757735	0.698736	0.486056	6.79478	1.18853	1.18606	0.295337
	This study	63.9358	27.849	2958	Mount Jourdanne	30I-2-1-25MI	MI in Ol-EMPA	30I-2-1-25MI	51.5618	1.28005	15.9636	0.0100004	0.889312	7.20343	0.105004	7.35826	11.4924	3.94514	0.191007	0	0	0.893878	2.654	2.651	3.70289	0.587444	0.785937	0.607212	0.674082	0.775358	7.45012	0.587444	0.586224	0.149219	-0.800114	0.172653	0.118031	0.127764	41.2604	28.2068	30.5327	2.39415
	This study	63.9358	27.849	2958	Mount Jourdanne	30I-2-1-3MI	MI in Ol-EMPA	30I-2-1-3MI	51.2112	1.10605	15.9227	0.0200009	0.889785	7.20726	0.165007	7.57033	11.5925	3.95717	0.193008	0	0.165007	0.869336	2.659	2.656	3.79	0.59328	0.787596	0.609568	0.674545	0.791386	7.61914	0.59328	0.592048	0.174503	-0.636404	0.17014	0.120409	0.115689	41.882	29.6399	28.4781	2.0834
	This study	63.9358	27.849	2958	Mount Jourdanne	30I-2-1-6MI	MI in Ol-EMPA	30I-2-1-6MI	51.0747	1.17004	16.4165	0.0350011	0.894398	7.24463	0.156005	7.29524	11.2284	4.10413	0.212007	0	0.169005	0.915122	2.657	2.654	3.82651	0.572779	0.781653	0.601167	0.67288	0.782261	7.44282	0.572779	0.57159	0.181197	-1.08307	0.175884	0.11195	0.116153	43.537	27.7112	28.7517	3.71197
	This study	63.9358	27.849	2958	Mount Jourdanne	30I-2-1-8MI	MI in Ol-EMPA	30I-2-1-8MI	51.3256	1.17704	15.8075	0.0310009	0.889474	7.20474	0.128004	7.63823	11.5784	3.87812	0.175005	0	0.167005	0.851915	2.659	2.656	3.73978	0.598923	0.789175	0.611818	0.674984	0.78739	7.67291	0.598923	0.597679	0.148683	-0.63018	0.169971	0.119365	0.122337	41.2879	28.9951	29.717	2.06595
	This study	63.9358	27.849	2958	Mount Jourdanne	30I-2-1-9MI	MI in Ol-EMPA	30I-2-1-9MI	51.2148	1.05706	16.1779	0.0260014	0.88933	7.20357	0.117006	7.54242	11.2936	3.98022	0.250014	0	0.248014	0.866747	2.657	2.654	3.80149	0.583806	0.78489	0.60573	0.673789	0.784091	7.5928	0.583806	0.582594	0.236518	-0.943648	0.17207	0.114724	0.120254	42.2726	28.1844	29.543	2.90325
	This study	63.9358	27.849	2958	Mount Jourdanne	30I-2-1-10MI	MI in Ol-EMPA	30I-2-1-10MI	51.575	1.01804	16.5727	0.0270011	0.894216	7.24315	0.126005	6.93227	10.8834	4.16516	0.308012	0	0.25501	0.940026	2.65	2.647	3.75475	0.546893	0.773657	0.590028	0.670613	0.736774	7.19494	0.546893	0.545757	0.302554	-1.53689	0.17546	0.108362	0.131682	42.2282	26.0797	31.6921	3.76257
	This study	63.9358	27.849	2958	Mount Jourdanne	30I-2-1-11-2MI	MI in Ol-EMPA	30I-2-1-11-2MI	51.2418	1.03804	16.1786	0.027001	0.894035	7.24168	0.184007	7.31026	11.2424	4.12615	0.202007	0	0.314011	0.91666	2.657	2.654	3.85209	0.560333	0.77788	0.595888	0.671814	0.786321	7.45106	0.560333	0.559169	0.194605	-1.06452	0.171845	0.114623	0.118645	42.419	28.2941	29.2869	2.92834
	This study	63.9358	27.849	2958	Mount Jourdanne	30I-2-1-12MI	MI in Ol-EMPA	30I-2-1-12MI	50.9269	0.960016	16.0913	0.0490008	0.890818	7.21563	0.154003	7.46713	12.0052	3.83506	0.192003	0	0.213004	0.888897	2.664	2.661	3.63848	0.644253	0.801058	0.628998	0.678254	0.79053	7.54494	0.644253	0.642915	0.2	-0.254659	0.170157	0.123922	0.10623	42.5064	30.9565	26.5371	1.82235
	This study	63.9358	27.849	2958	Mount Jourdanne	30I-2-1-13MI	MI in Ol-EMPA	30I-2-1-13MI	51.2135	1.15903	16.3365	0.0460014	0.889807	7.20744	0.112003	7.44122	11.0483	4.09512	0.217007	0	0.234007	0.882842	2.655	2.653	3.87165	0.560557	0.77795	0.595984	0.671834	0.78052	7.51682	0.560557	0.559393	0.18723	-1.2193	0.175033	0.109466	0.1227	42.9847	26.8826	30.1327	3.79111
	This study	63.9358	27.849	2958	Mount Jourdanne	30I-2-1-14-1MI	MI in Ol-EMPA	30I-2-1-14-1MI	51.0964	0.992027	16.4894	0.0230006	0.892583	7.22992	0.189005	7.56721	10.9553	4.14811	0.260007	0	0.157004	0.874976	2.653	2.65	3.9694	0.555144	0.776269	0.593645	0.671357	0.795963	7.63931	0.555144	0.553991	0.262097	-1.27454	0.174292	0.108682	0.116351	43.6466	27.2165	29.1369	3.96741
	This study	63.9358	27.849	2958	Mount Jourdanne	30I-2-1-14-2MI	MI in Ol-EMPA	30I-2-1-14-2MI	51.2185	1.07103	16.3825	0.0150004	0.889162	7.20221	0.153004	7.55822	10.8993	4.15312	0.213006	0	0.245007	0.867102	2.653	2.651	3.97062	0.546756	0.773613	0.589968	0.6706	0.787207	7.60422	0.546756	0.545621	0.19888	-1.33322	0.174179	0.10737	0.122265	43.1334	26.5889	30.2776	3.98213
	This study	63.9358	27.849	2958	Mount Jourdanne	30I-2-1-14-3MI	MI in Ol-EMPA	30I-2-1-14-3MI	51.244	1.11604	16.0816	0.00800032	0.89026	7.21111	0.185007	7.5543	11.2304	4.07616	0.24101	0	0.162006	0.873889	2.655	2.652	3.89644	0.563182	0.778755	0.597108	0.672062	0.79267	7.60993	0.563182	0.562012	0.21595	-1.00327	0.171746	0.115921	0.117919	42.345	28.5812	29.0738	2.76997
	This study	63.9358	27.849	2958	Mount Jourdanne	30I-2-1-15MI	MI in Ol-EMPA	30I-2-1-15MI	51.3439	0.984017	16.2783	0.00900016	0.889496	7.20492	0.131002	7.46113	11.3622	3.98307	0.209004	0	0.144002	0.882388	2.654	2.652	3.77452	0.589088	0.786407	0.607879	0.674213	0.78367	7.52978	0.589088	0.587865	0.212398	-0.899466	0.172028	0.113814	0.122199	42.1595	27.8928	29.9477	2.97164
	This study	63.9358	27.849	2958	Mount Jourdanne	30I-2-1-18MI	MI in Ol-EMPA	30I-2-1-18MI	51.2759	1.05702	16.3723	0.0340006	0.889718	7.20672	0.129002	7.39613	11.1732	3.99907	0.219004	0	0.248004	0.892223	2.656	2.653	3.76604	0.581073	0.784097	0.604608	0.673567	0.780705	7.48167	0.581073	0.579866	0.20719	-1.10797	0.174028	0.109934	0.125293	42.5232	26.862	30.6148	3.57966
	This study	63.9358	27.849	2958	Mount Jourdanne	30I-2-1-19MI	MI in Ol-EMPA	30I-2-1-19MI	51.5058	1.09304	16.2816	0.0460016	0.889867	7.20793	0.144005	7.50526	10.8734	4.09414	0.207007	0	0.152005	0.877222	2.651	2.648	3.89476	0.546837	0.773639	0.590003	0.670608	0.786932	7.56741	0.546837	0.545701	0.189387	-1.37504	0.173669	0.10655	0.131856	42.1449	25.8571	31.998	3.81476
	This study	63.9358	27.849	2958	Mount Jourdanne	30I-2-1-20MI	MI in Ol-EMPA	30I-2-1-20MI	51.524	0.992038	16.5026	0.0440017	0.889393	7.20408	0.0910035	7.53229	10.6614	4.15316	0.231009	0	0.175007	0.864515	2.648	2.646	3.96058	0.535545	0.769965	0.584947	0.669555	0.780287	7.58516	0.535545	0.534433	0.232863	-1.5789	0.174559	0.102332	0.133198	42.5662	24.9536	32.4802	4.38092
	This study	63.9358	27.849	2958	Mount Jourdanne	30I-2-1-22MI	MI in Ol-EMPA	30I-2-1-22MI	51.2023	0.954024	16.3744	0.0100003	0.889414	7.20426	0.126003	7.36519	11.3743	4.0871	0.241006	0	0.172004	0.895061	2.655	2.652	3.83621	0.579697	0.783695	0.604042	0.673454	0.777626	7.45607	0.579697	0.578493	0.252621	-0.916156	0.172602	0.115778	0.11422	42.8719	28.7575	28.3705	2.95321
	This study	63.9358	27.849	2958	Mount Jourdanne	30I-2-1-23MI	MI in Ol-EMPA	30I-2-1-23MI	51.5531	1.01804	16.2127	0.0540022	0.889695	7.20653	0.135006	7.3963	10.9034	4.16817	0.203008	0	0.260011	0.892777	2.651	2.649	3.92264	0.535838	0.770062	0.58508	0.669583	0.781221	7.48163	0.535838	0.534726	0.199411	-1.37766	0.172107	0.108777	0.130121	41.8747	26.4661	31.6592	3.4333
	This study	63.9358	27.849	2958	Mount Jourdanne	30I-2-1-24MI	MI in Ol-EMPA	30I-2-1-24MI	51.3223	1.23406	16.3427	0.067003	0.889543	7.2053	0.130006	7.39633	11.0415	4.00118	0.243011	0	0.127006	0.892548	2.654	2.652	3.76807	0.572367	0.78153	0.600994	0.672845	0.781026	7.48046	0.572367	0.571178	0.196921	-1.2396	0.176172	0.108457	0.128759	42.6166	26.2361	31.1473	3.88247
	This study	63.9358	27.849	2958	Mount Jourdanne	30I-TVG02-1	basaltic glass-XRF	30I-TVG02-1	51.7876	1.00286	19.9152	0	0.670804	5.43351	0.109625	5.66395	11.2568	3.83687	0.203009	0	0.119775	0.238634	2.604	2.602	3.13232	0.734876	0.821204	0.659155	0.683651	0.13266	5.28605	0.734876	0.733351	0.202429	-1.54397	0.207875	0.0737751	0.158003	47.2816	16.7803	35.9381	9.32522
	This study (No. 215)	63.9358	27.849	2958	Mount Jourdanne	30I-2-1-4-1	glass-EMPA data	30I-2-1-4-1	51.6128	1.4149	16.0748	0	0.917985	7.43568	0.176735	6.81853	11.0338	4.28837	0.226505	0	0	0.843912	2.651	2.648	3.82344	0.521958	0.765381	0.578694	0.668233	0.643097	7.28994	0.521958	0.520874	0.160086	-1.42068	0.175366	0.115496	0.127016	41.9658	27.6386	30.3956	2.98469
	This study (No. 217)	63.9358	27.849	2958	Mount Jourdanne	30I-2-1-5	glass-EMPAdata	30I-2-1-5	51.6019	1.41146	15.8959	0	0.923748	7.48236	0.157054	6.84755	11.1691	4.23235	0.278644	0	0	0.84042	2.652	2.649	3.78477	0.529506	0.76795	0.582191	0.668975	0.645079	7.34874	0.529506	0.528407	0.197416	-1.27666	0.173569	0.12042	0.124561	41.469	28.7707	29.7603	2.25429
	This study (No. 218)	63.9358	27.849	2958	Mount Jourdanne	30I-2-1-6	glass-EMPAdata	30I-2-1-6	51.5068	1.43176	15.9606	0	0.925518	7.4967	0.139536	6.93532	11.1659	4.1891	0.248737	0	0	0.815344	2.654	2.651	3.77674	0.537989	0.77077	0.586052	0.669786	0.639529	7.41936	0.537989	0.536872	0.173729	-1.25353	0.174458	0.118077	0.124717	41.8111	28.2988	29.8901	2.62755
	This study (No. 221)	63.9358	27.849	2958	Mount Jourdanne	30I-2-1-9	glass-EMPAdata	30I-2-1-9	51.4666	1.4292	15.9231	0	0.92598	7.50043	0.177509	6.91881	11.0036	4.42556	0.229241	0	0	0.82472	2.651	2.649	3.97789	0.501052	0.757962	0.568697	0.66607	0.644268	7.41152	0.501052	0.500012	0.160397	-1.4208	0.174058	0.118745	0.117657	42.4055	28.9298	28.6647	2.65078
	This study (No. 232)	63.9358	27.849	2958	Mount Jourdanne	30I-2-1-14	glass-EMPAdata	30I-2-1-14	51.6369	1.43061	15.9241	0	0.931463	7.54485	0.126941	7.14095	10.6238	4.39257	0.247838	0	0	0.857431	2.648	2.646	4.03083	0.485814	0.752251	0.561107	0.664385	0.70679	7.60811	0.485814	0.484806	0.173239	-1.73393	0.174085	0.112024	0.128907	41.9465	26.9926	31.0609	3.24763
	This study (No. 256)	63.9358	27.849	2958	Mount Jourdanne	30I-2-1-23	glass-EMPAdata	30I-2-1-23	51.7752	1.39679	15.8633	0	0.910113	7.37191	0.182673	6.99304	10.9957	4.23579	0.275523	0	0	0.875877	2.649	2.646	3.83764	0.518055	0.764031	0.576863	0.667841	0.696758	7.34802	0.518055	0.516979	0.197254	-1.40639	0.173065	0.117604	0.131045	41.0385	27.8872	31.0743	2.42167
	This study	63.9358	27.849	2958	Mount Jourdanne	30I-2-1-1MI	MI in Pl-EMPA	30I-2-1-1MI	52.4311	1.35578	17.0277	0	0.847465	6.86447	0.110556	6.70878	10.9609	3.45126	0.242025	0	0	0.845221	2.641	2.638	3.07216	0.671814	0.807649	0.638719	0.68004	0.626571	6.74192	0.671814	0.670419	0.178514	-1.52651	0.183972	0.091838	0.184184	39.9945	19.9651	40.0405	5.18535
	This study	63.9358	27.849	2958	Mount Jourdanne	30I-2-1-2MI	MI in Pl-EMPA	30I-2-1-2MI	51.9139	1.38729	17.0206	0	0.848445	6.8724	0.166204	6.67007	10.756	4.11159	0.253443	0	0	0.855178	2.64	2.637	3.62359	0.558665	0.777365	0.59517	0.671668	0.627747	6.72862	0.558665	0.557505	0.182689	-1.74293	0.184297	0.0992726	0.148787	42.6262	22.9608	34.413	5.20033
	This study	63.9358	27.849	2958	Mount Jourdanne	30I-2-1-2MI-2	MI in Pl-EMPA	30I-2-1-2MI-2	52.1568	1.21493	16.9094	0	0.84278	6.82652	0.13878	6.6261	10.9907	4.05162	0.242419	0	0	0.851282	2.638	2.636	3.55924	0.572832	0.781669	0.601189	0.672884	0.6179	6.66835	0.572832	0.571643	0.199534	-1.52151	0.181049	0.103229	0.151449	41.5511	23.6912	34.7578	4.41807
	This study	63.9358	27.849	2958	Mount Jourdanne	30I-2-1-3 mi-1	MI in Pl-EMPA	30I-2-1-3 mi-1	51.7751	1.4177	16.616	0	0.879091	7.12064	0.168095	6.33238	11.0098	4.40224	0.278991	0	0	0.833061	2.643	2.64	3.76006	0.522789	0.765667	0.579082	0.668315	0.559818	6.7607	0.522789	0.521703	0.196791	-1.59048	0.180709	0.11327	0.129049	42.718	26.7759	30.5061	3.70829
	This study	63.9358	27.849	2958	Mount Jourdanne	30I-2-1-3 mi-2	MI in Pl-EMPA	30I-2-1-3 mi-2	51.6738	1.31157	16.9178	0	0.875301	7.08994	0.146178	6.63215	10.8264	4.26521	0.261639	0	0	0.894176	2.644	2.641	3.74179	0.541295	0.771851	0.587537	0.670096	0.650041	6.88945	0.541295	0.540171	0.199486	-1.68393	0.182341	0.104276	0.134647	43.2843	24.7531	31.9626	4.79272
	This study	63.9358	27.849	2958	Mount Jourdanne	30I-2-1-11mi	MI in Pl-EMPA	30I-2-1-11mi	51.2119	1.17008	17.4695	0	0.820541	6.64638	0.138704	7.09969	10.9739	4.2698	0.199529	0	0	0.894151	2.642	2.639	3.90567	0.571059	0.781139	0.600445	0.672735	0.729834	6.76286	0.571059	0.569873	0.170525	-1.39616	0.185981	0.0995912	0.119745	45.8853	24.5711	29.5436	6.02679
	This study	63.9358	27.849	2958	Mount Jourdanne	30I-2-1-12MI	MI in Pl-EMPA	30I-2-1-12MI	52.0141	1.29089	16.864	0	0.828523	6.71104	0.1385	6.59209	11.0977	4.24052	0.22264	0	0	0.852143	2.638	2.635	3.70808	0.552675	0.775494	0.59257	0.671136	0.613137	6.55666	0.552675	0.551528	0.172471	-1.42466	0.181554	0.108001	0.139236	42.341	25.1872	32.4718	4.18121
	This study	63.9358	27.849	2958	Mount Jourdanne	30I-2-1-13MI-1	MI in Pl-EMPA	30I-2-1-13MI-1	51.7577	1.26635	17.0301	0	0.834125	6.75641	0.144333	6.77692	10.9661	4.25079	0.217169	0	0	0.850842	2.64	2.637	3.77704	0.552891	0.775562	0.592664	0.671156	0.641667	6.68575	0.552891	0.551743	0.171493	-1.50084	0.182876	0.104016	0.134667	43.3809	24.674	31.945	4.86831
	This study	63.9358	27.849	2958	Mount Jourdanne	30I-2-1-13MI-2	MI in Pl-EMPA	30I-2-1-13MI-2	51.6894	1.24263	17.0413	0	0.829369	6.71789	0.11065	6.72895	11.2246	4.15718	0.258006	0	0	0.842995	2.641	2.638	3.68106	0.579819	0.783731	0.604092	0.673464	0.628118	6.62883	0.579819	0.578615	0.207629	-1.25668	0.18269	0.108306	0.130919	43.3001	25.6701	31.0298	4.43318
	This study	63.9358	27.849	2958	Mount Jourdanne	30I-2-1-13MI-3	MI in Pl-EMPA	30I-2-1-13MI-3	51.6521	1.21616	17.044	0	0.825733	6.68844	0.175057	6.72162	11.0706	4.37964	0.226613	0	0	0.845833	2.639	2.636	3.86886	0.543292	0.772498	0.588429	0.670282	0.629066	6.60038	0.543292	0.542164	0.186335	-1.41289	0.182385	0.108123	0.124502	43.9471	26.0532	29.9998	4.57888
	This study	63.9358	27.849	2958	Mount Jourdanne	30I-2-1-13MI-4	MI in Pl-EMPA	30I-2-1-13MI-4	51.5001	1.29625	17.107	0	0.836885	6.77876	0.136226	6.81499	11.0649	4.23039	0.234513	0	0	0.850436	2.643	2.64	3.77215	0.565913	0.779588	0.598272	0.672297	0.647498	6.72463	0.565913	0.564738	0.180917	-1.39059	0.184005	0.105247	0.127205	44.1834	25.272	30.5446	4.99765
	This study	63.9358	27.849	2958	Mount Jourdanne	30I-2-1-16mi-1	MI in Pl-EMPA	30I-2-1-16mi-1	52.3239	1.13797	17.0292	0	0.801144	6.48926	0.121871	6.74441	10.9194	4.20373	0.229121	0	0	0.789897	2.631	2.629	3.72592	0.550646	0.774853	0.591681	0.670954	0.590855	6.44322	0.550646	0.549502	0.201342	-1.5573	0.181261	0.102813	0.14987	41.7705	23.6928	34.5367	4.51918
	This study	63.9358	27.849	2958	Mount Jourdanne	30I-2-1-16mi-2	MI in Pl-EMPA	30I-2-1-16mi-2	51.487	1.16907	17.158	0	0.810586	6.56575	0.174559	6.91085	11.2617	4.2122	0.250332	0	0	0.817149	2.64	2.638	3.78864	0.580337	0.783882	0.604305	0.673506	0.637104	6.58992	0.580337	0.579132	0.214129	-1.16502	0.182913	0.108467	0.122038	44.2441	26.2367	29.5193	4.64244
	This study	63.9358	27.849	2958	Mount Jourdanne	30I-2-1-16mi-3	MI in Pl-EMPA	30I-2-1-16mi-3	51.5532	1.1763	17.0968	0	0.810257	6.56308	0.174488	6.90804	11.2572	4.21049	0.25023	0	0	0.81672	2.64	2.637	3.78619	0.577526	0.783058	0.603144	0.673275	0.63633	6.58617	0.547253	0.546116	0.212727	-1.17043	0.182404	0.108955	0.123703	43.9462	26.2502	29.8036	4.49941
	This study	63.9358	27.849	2958	Mount Jourdanne	30I-2-1-16mi-4	MI in Pl-EMPA	30I-2-1-16mi-4	51.7535	1.19211	16.9155	0	0.809322	6.55551	0.174286	6.90007	11.2442	4.20563	0.249941	0	0	0.815508	2.639	2.636	3.77925	0.569191	0.780579	0.599659	0.672577	0.63414	6.57552	0.480848	0.47985	0.209663	-1.18582	0.180823	0.110413	0.128677	43.062	26.2943	30.6437	4.0689
	This study	63.9358	27.849	2958	Mount Jourdanne	30I-2-1-17MI	MI in Pl-EMPA	30I-2-1-17MI	51.5318	1.4393	17.0252	0	0.816496	6.61361	0.1697	6.8248	11.1103	4.23836	0.230346	0	0	0.824379	2.641	2.638	3.78232	0.564109	0.779039	0.597504	0.672142	0.629195	6.58796	0.564109	0.562938	0.16004	-1.34223	0.184993	0.106855	0.127587	44.1054	25.4759	30.4187	4.88153
	This study	63.9358	27.849	2958	Mount Jourdanne	30I-2-1-22MI	MI in Pl-EMPA	30I-2-1-22MI	51.3113	1.22257	16.7649	0	0.89312	7.23427	0.16993	6.57447	11.2215	4.39402	0.213945	0	0	0.872667	2.649	2.647	3.83152	0.543489	0.772562	0.588517	0.6703	0.625055	6.97697	0.543489	0.542361	0.174996	-1.30618	0.179727	0.11338	0.113512	44.2004	27.8835	27.9161	3.95572
	This study	63.9358	27.849	2958	Mount Jourdanne	30I-2-1-1	MI in Pl-EMPA	30I-2-1-1	52.535	1.05823	17.1094	0	0.7915	6.41115	0.140104	6.69404	10.6886	4.13229	0.285836	0	0.153769	0.773836	2.628	2.625	3.64872	0.5487	0.774235	0.590826	0.670777	0.571511	6.3546	0.5487	0.547561	0.270108	-1.80315	0.18105	0.098565	0.161913	41.0053	22.3236	36.6711	4.71398
	This study	63.9358	27.849	2958	Mount Jourdanne	30I-2-1-2	MI in Pl-EMPA	30I-2-1-2	52.3621	1.09013	16.9919	0	0.810246	6.56299	0.140143	6.65206	10.5479	4.38035	0.27559	0	0.186535	0.799983	2.63	2.628	3.84589	0.508977	0.760829	0.572542	0.666909	0.584538	6.4623	0.508977	0.50792	0.252805	-1.95649	0.180297	0.100884	0.151043	41.7138	23.3407	34.9455	4.63402
	This study	63.9358	27.849	2958	Mount Jourdanne	30I-2-1-3	MI in Pl-EMPA	30I-2-1-3	52.1396	1.09999	16.9484	0	0.853912	6.91668	0.154597	6.57526	10.2432	4.56907	0.28786	0	0.211404	0.871277	2.634	2.631	3.97894	0.474663	0.747898	0.55538	0.66309	0.624186	6.71721	0.474663	0.473677	0.261693	-2.28424	0.179993	0.0993126	0.144293	42.4915	23.445	34.0636	4.9489
	This study	63.9358	27.849	2958	Mount Jourdanne	30I-2-1-4	MI in Pl-EMPA	30I-2-1-4	50.9932	1.53426	16.5866	0	0.99634	8.07035	0.178924	6.23861	10.0776	4.76221	0.372358	0	0.189572	0.649534	2.654	2.651	4.02245	0.448339	0.736989	0.541251	0.6598	0.425556	7.44838	0.448339	0.447408	0.242695	-2.55086	0.18188	0.105716	0.114461	45.2374	26.2937	28.4689	5.07377
	This study	63.9358	27.849	2958	Mount Jourdanne	30I-2-1-5	MI in Pl-EMPA	30I-2-1-5	52.0093	0.874589	17.1241	0	0.839813	6.80249	0.140015	6.67911	10.7309	4.41901	0.272857	0	0.107848	0.864015	2.635	2.632	3.88789	0.520779	0.764975	0.578143	0.668115	0.635695	6.67486	0.520779	0.519697	0.311983	-1.76536	0.178895	0.103388	0.135656	42.804	24.7376	32.4583	4.57799
	This study	63.9358	27.849	2958	Mount Jourdanne	30I-2-1-6-1	MI in Pl-EMPA	30I-2-1-6-1	52.706	0.923119	16.93	0	0.816555	6.61409	0.108661	6.61701	10.3461	4.41868	0.325271	0	0.194468	0.825878	2.626	2.623	3.86653	0.489889	0.753804	0.563163	0.664845	0.598064	6.48846	0.489889	0.488872	0.352361	-2.16877	0.177599	0.100094	0.15929	40.642	22.9057	36.4523	4.31209
	This study	63.9358	27.849	2958	Mount Jourdanne	30I-2-1-6-2	MI in Pl-EMPA	30I-2-1-6-2	51.8005	1.01786	17.185	0	0.845996	6.85257	0.173878	6.81148	10.333	4.43776	0.299947	0	0.24198	0.867163	2.637	2.634	3.95004	0.503148	0.758727	0.569721	0.666294	0.659656	6.786	0.503148	0.502104	0.294684	-2.12351	0.181286	0.0968612	0.138485	43.5121	23.2486	33.2392	5.48577
	This study	63.9358	27.849	2958	Mount Jourdanne	30I-2-1-7	MI in Pl-EMPA	30I-2-1-7	52.224	0.895934	17.1132	0	0.818275	6.62803	0.125486	6.65074	10.7997	4.31709	0.286298	0	0.141226	0.831356	2.632	2.63	3.79181	0.53395	0.769436	0.584222	0.669403	0.607256	6.51573	0.53395	0.532841	0.319553	-1.70504	0.179056	0.103505	0.143749	42.0013	24.2794	33.7193	4.3902
	This study	63.9358	27.849	2958	Mount Jourdanne	30I-2-1-8	MI in Pl-EMPA	30I-2-1-8	51.4625	0.95344	17.6265	0	0.780014	6.31812	0.132813	7.15746	11.0822	4.09227	0.274215	0	0.120433	0.680963	2.635	2.633	3.76703	0.604162	0.79062	0.613885	0.675386	0.563533	6.49454	0.604162	0.602908	0.287606	-1.27054	0.184809	0.0994967	0.128329	44.7876	24.1125	31.0998	5.7194
	This study	63.9358	27.849	2958	Mount Jourdanne	30I-2-1-9-1	MI in Pl-EMPA	30I-2-1-9-1	52.1765	1.20781	16.7838	0	0.842397	6.82341	0.174128	6.41241	10.5081	4.53886	0.297684	0	0.234906	0.875837	2.635	2.632	3.8983	0.485073	0.751966	0.560731	0.664301	0.601264	6.56383	0.485073	0.484066	0.246465	-2.0682	0.179728	0.105476	0.142383	42.0331	24.6678	33.2991	4.24793
	This study	63.9358	27.849	2958	Mount Jourdanne	30I-2-1-9-2	MI in Pl-EMPA	30I-2-1-9-2	52.1893	1.19552	16.7281	0	0.876012	7.0957	0.131194	6.32765	10.4237	4.52579	0.315238	0	0.191903	0.891787	2.637	2.635	3.85964	0.480847	0.750331	0.558574	0.663815	0.598521	6.73886	0.480847	0.479849	0.263683	-2.17804	0.179028	0.104866	0.144447	41.7956	24.4819	33.7225	4.21232
	This study	63.9358	27.849	2958	Mount Jourdanne	30I-2-1-10	MI in Pl-EMPA	30I-2-1-10	51.5433	1.13445	17.1277	0	0.843685	6.83385	0.18314	6.7835	10.5562	4.5447	0.283769	0	0.165687	0.866789	2.639	2.636	4.03221	0.502742	0.758579	0.569523	0.666251	0.654774	6.75511	0.502742	0.501699	0.250138	-1.90872	0.182182	0.102614	0.124282	44.5349	25.0841	30.381	5.23049
	This study	63.9358	27.849	2958	Mount Jourdanne	30I-2-1-10-2	MI in Pl-EMPA	30I-2-1-10-2	51.693	1.20867	17.3215	0	0.821032	6.65036	0.199086	6.85494	10.2477	4.47693	0.31847	0	0.208436	0.832746	2.634	2.632	3.99951	0.49959	0.757425	0.567981	0.665912	0.640361	6.63487	0.49959	0.498553	0.263489	-2.19585	0.185012	0.0952225	0.136671	44.3775	22.8403	32.7822	6.02397
	This study	63.9358	27.849	2958	Mount Jourdanne	30I-2-1-11	MI in Pl-EMPA	30I-2-1-11	51.6921	1.19182	17.1915	0	0.847021	6.86087	0.110684	6.78181	9.91927	4.79454	0.385058	0	0.225406	0.857788	2.632	2.629	4.2466	0.448165	0.736914	0.541154	0.659777	0.647699	6.77723	0.448165	0.447235	0.323084	-2.54619	0.183526	0.0978863	0.128486	44.7736	23.8806	31.3458	5.80197
	This study	63.9358	27.849	2958	Mount Jourdanne	30I-2-1-12	MI in Pl-EMPA	30I-2-1-12	51.3461	1.19027	16.9834	0	0.897792	7.27212	0.14174	6.57578	10.6725	4.36033	0.282568	0	0.27746	0.873625	2.649	2.646	3.80363	0.527325	0.767213	0.581186	0.668763	0.625952	7.0087	0.527325	0.52623	0.237398	-1.85478	0.181466	0.103089	0.127039	44.0886	25.0463	30.8652	5.04349
	This study	63.9358	27.849	2958	Mount Jourdanne	30I-2-1-13	MI in Pl-EMPA	30I-2-1-13	53.1065	1.20822	16.4264	0	0.915808	7.41804	0.133887	6.0462	9.76334	4.37974	0.371947	0	0.229931	0.761349	2.631	2.629	3.65472	0.449118	0.737325	0.541681	0.659902	0.472944	6.85001	0.449118	0.448185	0.307848	-2.9228	0.176228	0.0954999	0.185099	38.5765	20.9051	40.5185	4.15772
	This study	63.9358	27.849	2958	Mount Jourdanne	30I-2-1-14	MI in Pl-EMPA	30I-2-1-14	51.9739	1.21238	16.9408	0	0.835638	6.76866	0.146495	6.59251	10.4318	4.5457	0.32614	0	0.225998	0.859891	2.635	2.632	3.96528	0.487216	0.752787	0.561816	0.664544	0.618779	6.60423	0.487216	0.486204	0.269008	-2.09045	0.181325	0.103593	0.137427	42.9328	24.5281	32.5391	4.72102
	This study	63.9358	27.849	2958	Mount Jourdanne	30I-2-1-15	MI in Pl-EMPA	30I-2-1-15	51.3887	1.05172	17.2327	0	0.843095	6.82907	0.102464	6.87623	10.5406	4.62802	0.321773	0	0.185617	0.851976	2.638	2.635	4.13868	0.497477	0.756645	0.56694	0.665683	0.658611	6.80082	0.497477	0.496444	0.30595	-1.89649	0.182177	0.10386	0.115822	45.3335	25.8449	28.8216	5.29289
	This study	63.9358	27.849	2958	Mount Jourdanne	30I-2-1-16	MI in Pl-EMPA	30I-2-1-16	52.1122	1.07103	16.8536	0	0.846645	6.85782	0.118526	6.46691	10.7358	4.48212	0.249376	0	0.206018	0.869915	2.637	2.635	3.86944	0.504566	0.759241	0.570411	0.666445	0.605853	6.61673	0.504566	0.503518	0.232836	-1.82417	0.178701	0.106398	0.138614	42.175	25.1109	32.7141	4.1344
	This study	63.9358	27.849	2958	Mount Jourdanne	30I-2-1-17	MI in Pl-EMPA	30I-2-1-17	51.6572	1.1869	16.3099	0	1.0327	8.36488	0.184245	5.93017	10.0747	4.63067	0.38412	0	0.244479	0.350234	2.647	2.645	3.81773	0.44743	0.736595	0.540747	0.65968	0.210513	7.48881	0.44743	0.446501	0.323635	-2.64623	0.174819	0.106631	0.134449	42.034	25.6387	32.3274	3.852
	This study	63.9358	27.849	2958	Mount Jourdanne	30I-2-1-18	MI in Pl-EMPA	30I-2-1-18	52.6851	0.857006	16.8059	0	0.871652	7.06038	0.174812	6.46399	9.98514	4.73368	0.315076	0	0.0472631	0.866543	2.625	2.623	4.07736	0.438274	0.732564	0.535608	0.658447	0.603041	6.77796	0.438274	0.437364	0.367648	-2.57566	0.175555	0.0996318	0.152265	41.0701	23.3084	35.6215	4.34884
	This study	63.9358	27.849	2958	Mount Jourdanne	30I-2-1-19	MI in Pl-EMPA	30I-2-1-19	52.5428	0.789059	17.0887	0	0.827001	6.69871	0.154481	6.67394	9.85215	4.83169	0.390365	0	0.151117	0.842112	2.62	2.618	4.23693	0.431961	0.729712	0.531997	0.657569	0.618764	6.58567	0.431961	0.431064	0.494723	-2.64567	0.177478	0.0984659	0.145261	42.1357	23.3772	34.4871	4.81328
	This study	63.9358	27.849	2958	Mount Jourdanne	30I-2-1-20	MI in Pl-EMPA	30I-2-1-20	51.6063	1.2249	17.3673	0	0.789261	6.39301	0.151333	6.89393	10.5804	4.50085	0.291645	0	0.201105	0.731678	2.633	2.63	4.03454	0.515292	0.763065	0.575557	0.667561	0.568092	6.43099	0.515292	0.514222	0.238097	-1.85143	0.185665	0.100237	0.127643	44.896	24.2385	30.8655	5.71897
	This study	63.9358	27.849	2958	Mount Jourdanne	30I-2-1-21	MI in Pl-EMPA	30I-2-1-21	52.2982	1.11801	16.4065	0	0.979273	7.93211	0.168465	6.03826	9.64764	4.81714	0.384972	0	0.209372	0.569478	2.637	2.635	3.99928	0.409239	0.718923	0.518524	0.654207	0.352966	7.22944	0.409239	0.408389	0.344336	-3.04088	0.174904	0.101104	0.149131	41.1404	23.7813	35.0783	4.19009
	(c)	63.927	27.8511	2839	Mount Jourdanne	87-S01	whole rock-XRF	87-S01	51.4802	1.24402	17.1331	0	0.803894	6.51154	0.141596	7.34275	10.9636	3.96468	0.273078	0	0.141596	0.75701	2.642	2.639	3.71548	0.599453	0.789322	0.612028	0.675025	0.654286	6.77837	0.599453	0.598208	0.219512	-1.33361	0.183607	0.100125	0.136572	43.6843	23.822	32.4936	5.34027
	(c)	63.923	27.8512	2762	Mount Jourdanne	87-S02	whole rock-XRF	87-S02	51.6434	1.19208	17.5074	0	0.787822	6.38135	0.131331	7.23331	10.9005	3.89952	0.191945	0	0.131331	0.711988	2.638	2.636	3.61869	0.617245	0.794145	0.61895	0.67636	0.599862	6.5932	0.617245	0.615964	0.161017	-1.42953	0.186629	0.0916935	0.147315	43.8469	21.5427	34.6104	6.28234
	(c)	63.926	27.8511	2762	Mount Jourdanne	87-S03	whole rock-XRF	87-S03	51.4293	1.15549	18.204	0	0.741788	6.00849	0.131766	6.82142	11.2001	3.96311	0.202717	0	0.141902	0.516007	2.629	2.626	3.54324	0.651564	0.80285	0.631627	0.678742	0.393504	6.06694	0.651564	0.650212	0.175439	-1.25347	0.193002	0.091574	0.136888	45.7932	21.7276	32.4792	7.04112
	(c)	63.9267	27.8508	2816	Mount Jourdanne	87-S06	whole rock-XRF	87-S06	51.396	1.23993	17.4809	0	0.796639	6.45278	0.132123	7.10417	11.0577	3.92305	0.27441	0	0.142287	0.770139	2.641	2.639	3.59745	0.624443	0.796034	0.621681	0.67688	0.629285	6.58963	0.624443	0.623147	0.221311	-1.31104	0.186967	0.097763	0.1364	44.3966	23.2144	32.389	5.89028
	(d)	63.36	28.11	4950	near area of Mount Jourdanne	ED22-2-1	glass-SIMS data	ED22-2-1	48.9413	0.948861	17.7487	0	1.09868	8.89932	0.189772	8.30004	10.4275	3.2461	0.109868	0	0.0898921	0.258703	2.689	2.686	3.34509	0.758795	0.825859	0.666314	0.684872	0.258703	10.3654	0.758795	0.75722	0.115789	-1.5825	0.185951	0.0677368	0.114936	50.4446	18.3756	31.1798	9.97562
	(d)	64.06	27.51	2650	Mount Jourdanne	SMS19-4-4	glass-SIMS data	SMS19-4-4	51.3324	1.28482	17.1543	0	0.854314	6.91994	0.150564	7.87954	10.3187	3.80426	0.140527	0	0.160602	0.855569	2.648	2.646	3.75791	0.590407	0.786782	0.608412	0.674318	0.833705	7.58083	0.590407	0.589181	0.109375	-1.81745	0.184326	0.0816081	0.153365	43.9605	19.463	36.5765	7.09606
	(e)	63.936	27.849	2958	Mount Jourdanne	30I-TVG2-1-GL1-1	glass-EMPA data	30I-TVG2-1-GL1-1	52.3495	1.74485	16.1922	0	0.82404	6.67473	0.124415	6.83879	10.7432	4.05412	0.264003	0	0.190163	0.831407	2.64	2.637	3.62743	0.533884	0.769414	0.584192	0.669397	0.636773	6.6476	0.533884	0.532775	0.151304	-1.70515	0.180647	0.106578	0.16262	40.1577	23.6921	36.1502	3.76281
	(e)	63.936	27.849	2958	Mount Jourdanne	30I-TVG2-1-GL1-2	glass-EMPA data	30I-TVG2-1-GL1-2	52.3598	1.36857	16.1144	0	0.830562	6.72755	0.104186	7.1979	10.7857	4.0511	0.238716	0	0.221521	0.826558	2.639	2.637	3.74394	0.533713	0.769357	0.584115	0.66938	0.690604	6.89449	0.533713	0.532605	0.174427	-1.5549	0.175175	0.107245	0.158267	39.7503	24.336	35.9137	3.29997
	(e)	63.936	27.849	2958	Mount Jourdanne	30I-TVG2-1-GL1-3	glass-EMPA data	30I-TVG2-1-GL1-3	52.7484	1.28185	16.2204	0	0.812301	6.57964	0.0632255	7.03741	10.7279	4.0862	0.2631	0	0.179479	0.802066	2.633	2.63	3.72058	0.525853	0.766714	0.580506	0.668618	0.644938	6.66841	0.525853	0.524761	0.205251	-1.66083	0.175129	0.106518	0.166709	39.0603	23.7575	37.1822	3.20891
	(e)	63.936	27.849	2958	Mount Jourdanne	30I-TVG2-1-GL1-4	glass-EMPA data	30I-TVG2-1-GL1-4	52.5807	1.2804	16.1434	0	0.822385	6.66132	0.128243	7.00147	10.7806	4.1445	0.25038	0	0.206614	0.828206	2.636	2.633	3.75998	0.52018	0.764768	0.577862	0.668055	0.660186	6.72185	0.52018	0.5191	0.195548	-1.61899	0.174356	0.108747	0.159827	39.3642	24.5518	36.084	3.02171
	(e)	63.936	27.849	2958	Mount Jourdanne	30I-TVG2-1-GL1-5	glass-EMPA data	30I-TVG2-1-GL1-5	52.65	1.52229	15.9835	0	0.842008	6.82026	0.180045	7.05816	10.6277	3.88209	0.260964	0	0.172964	0.837516	2.639	2.637	3.54619	0.541333	0.771863	0.587554	0.6701	0.676822	6.89602	0.541333	0.540209	0.171429	-1.75485	0.175815	0.103692	0.175919	38.6045	22.7682	38.6273	3.4032
	(e)	63.936	27.849	2958	Mount Jourdanne	30I-TVG2-1-GL1-6	glass-EMPA data	30I-TVG2-1-GL1-6	52.8317	1.20755	16.1674	0	0.818464	6.62956	0.200074	6.98431	10.6009	4.11827	0.26101	0	0.180777	0.833793	2.632	2.629	3.73106	0.513083	0.762288	0.574508	0.667334	0.661872	6.68439	0.513083	0.512018	0.216148	-1.80383	0.173679	0.105223	0.169576	38.7264	23.4622	37.8114	3.1712
	(e)	63.936	27.849	2958	Mount Jourdanne	30I-TVG2-1-GL1-7	glass-EMPA data	30I-TVG2-1-GL1-7	52.226	1.33782	16.0569	0	0.834232	6.75728	0.199402	7.07469	10.9508	4.16913	0.232975	0	0.160742	0.85381	2.64	2.638	3.80702	0.52601	0.766767	0.580578	0.668634	0.69274	6.8489	0.52601	0.524918	0.174144	-1.42677	0.174226	0.112474	0.147003	40.1718	25.9334	33.8948	2.8306
	(e)	63.936	27.849	2958	Mount Jourdanne	30I-TVG2-1-GL1-8	glass-EMPA data	30I-TVG2-1-GL1-8	52.5672	1.59037	15.9361	0	0.823478	6.67017	0.154592	7.08393	10.7466	4.02847	0.240476	0	0.158633	0.83103	2.638	2.635	3.68487	0.526762	0.767023	0.580926	0.668707	0.675754	6.7755	0.526762	0.525668	0.151207	-1.62818	0.176202	0.107988	0.16618	39.1238	23.9777	36.8985	3.14707
	(e)	63.936	27.849	2958	Mount Jourdanne	30I-TVG2-1-GL1-9	glass-EMPA data	30I-TVG2-1-GL1-9	52.5729	1.39677	16.1093	0	0.844373	6.83942	0.0939939	6.92422	10.7881	4.01142	0.237512	0	0.181924	0.84604	2.639	2.637	3.61754	0.536757	0.770365	0.585495	0.66967	0.661801	6.83637	0.536757	0.535643	0.170043	-1.63465	0.175478	0.106658	0.166337	39.128	23.7825	37.0896	3.23117
	(e)	63.936	27.849	2958	Mount Jourdanne	30I-TVG2-1-GL1-10	glass-EMPA data	30I-TVG2-1-GL1-10	52.1139	1.60024	16.1694	0	0.851136	6.89421	0.159923	6.95516	10.6947	4.11979	0.2424	0	0.19915	0.859443	2.643	2.641	3.72263	0.524628	0.766296	0.579938	0.668498	0.6774	6.90203	0.524628	0.523538	0.151477	-1.7187	0.178613	0.106309	0.154225	40.6727	24.2081	35.1192	3.7949
	(e)	63.936	27.849	2958	Mount Jourdanne	30I-TVG2-2-GL2-1	glass-EMPA data	30I-TVG2-2-GL2-1	52.7513	1.24627	16.1852	0	0.804834	6.51916	0.17687	7.0237	10.7891	4.06291	0.254571	0	0.186072	0.786307	2.633	2.63	3.69535	0.530699	0.76835	0.582738	0.669091	0.630173	6.60704	0.530699	0.529597	0.204266	-1.6038	0.174338	0.107306	0.16653	38.8996	23.943	37.1574	3.0527
	(e)	63.936	27.849	2958	Mount Jourdanne	30I-TVG2-2-GL2-2	glass-EMPA data	30I-TVG2-2-GL2-2	52.4084	1.37155	16.2481	0	0.801098	6.48889	0.180683	7.05383	10.9057	4.12902	0.246386	0	0.166311	0.781862	2.635	2.633	3.76415	0.533364	0.769241	0.583956	0.669347	0.631188	6.59573	0.533364	0.532257	0.179641	-1.47818	0.176524	0.109574	0.154289	40.0839	24.8812	35.0349	3.23253
	(e)	63.936	27.849	2958	Mount Jourdanne	30I-TVG2-2-GL2-3	glass-EMPA data	30I-TVG2-2-GL2-3	52.5652	1.62285	15.9256	0	0.84519	6.84604	0.129666	6.89963	10.7389	3.98317	0.256292	0	0.187407	0.85462	2.641	2.638	3.58504	0.532042	0.7688	0.583352	0.66922	0.664481	6.82847	0.532042	0.530937	0.157928	-1.69116	0.176505	0.107727	0.169196	38.9269	23.7583	37.3148	3.14387
	(e)	63.936	27.849	2958	Mount Jourdanne	30I-TVG2-2-GL2-4	glass-EMPA data	30I-TVG2-2-GL2-4	52.8976	1.28642	16.1006	0	0.8505	6.88905	0.0701129	6.92187	10.6958	3.85824	0.235742	0	0.194081	0.852963	2.638	2.636	3.48282	0.549596	0.77452	0.59122	0.670859	0.666832	6.87849	0.549596	0.548455	0.183254	-1.72766	0.174011	0.10257	0.181538	37.9838	22.3895	39.6267	3.26221
	(e)	63.936	27.849	2958	Mount Jourdanne	30I-TVG2-2-GL2-5	glass-EMPA data	30I-TVG2-2-GL2-5	52.6721	1.3056	16.0482	0	0.834275	6.75763	0.234703	6.97099	10.6958	4.07124	0.25604	0	0.153421	0.864256	2.636	2.633	3.68522	0.521372	0.76518	0.57842	0.668174	0.683832	6.79047	0.521372	0.520289	0.196109	-1.71293	0.173738	0.107167	0.166331	38.847	23.962	37.191	3.01901
	(e)	63.923	27.851	2743	Mount Jourdanne	49I-TVG01	whole rock-XRF	49I-TVG01	51.3085	1.14308	17.768	0	0.777937	6.30129	0.130352	7.35986	10.9997	3.87045	0.200541	0	0.140379	0.71146	2.64	2.637	3.63462	0.641038	0.800259	0.62783	0.678037	0.617355	6.58724	0.641038	0.639707	0.175439	-1.29236	0.18857	0.0907122	0.137999	45.1903	21.7389	33.0709	6.78361
	(e)	63.923	27.851	2743	Mount Jourdanne	49I-TVG01duplicate	whole rock-XRF	49I-TVG01duplicate	51.2547	1.13431	17.8277	0	0.778796	6.30825	0.130496	7.30776	10.9817	3.93495	0.200763	0	0.140534	0.705099	2.639	2.637	3.6761	0.63228	0.798051	0.62461	0.677433	0.60449	6.5651	0.63228	0.630967	0.176991	-1.32596	0.189047	0.0908533	0.134753	45.5915	21.9106	32.4979	6.88997
	(e)	63.923	27.851	2759	Mount Jourdanne	20VII-TVG19-1	whole rock-XRF	20VII-TVG19-1	51.4157	1.17861	17.649	0	0.782556	6.33871	0.130957	7.28322	10.9601	3.88842	0.231693	0	0.141031	0.709216	2.639	2.636	3.62525	0.630204	0.797521	0.623838	0.677288	0.604553	6.58046	0.630204	0.628895	0.196581	-1.35494	0.187848	0.0924551	0.140222	44.6699	21.9856	33.3444	6.47109
	(e)	63.935	27.842		Mount Jourdanne	26VI-TVG02-1	whole rock-XRF	26VI-TVG02-1	51.8107	1.58922	15.5804	0	0.959369	7.77089	0.170992	6.4776	10.6921	4.4961	0.261518	0	0.191109	0.783477	2.653	2.65	3.88462	0.465802	0.744328	0.550722	0.66202	0.547187	7.35661	0.465802	0.464835	0.164557	-1.86466	0.172699	0.118718	0.132383	40.7502	28.0127	31.2371	2.22366
	(e)	63.935	27.849	2936	Mount Jourdanne	26VI-TVG03-1	whole rock-XRF	26VI-TVG03-1	51.803	1.61192	15.4744	0	0.993136	8.0444	0.171266	6.47789	10.5178	4.4227	0.282085	0	0.20149	0.539264	2.654	2.652	3.82367	0.462712	0.74306	0.549075	0.661639	0.376656	7.57692	0.462712	0.461752	0.175	-2.03888	0.171943	0.11612	0.138213	40.3361	27.2406	32.4234	2.35125
	(e)	63.935	27.849	2936	Mount Jourdanne	26VI-TVG03-1-2	whole rock-XRF	26VI-TVG03-1-2	51.8383	1.63562	15.5033	0	0.983176	7.96373	0.170587	6.43212	10.5262	4.45532	0.291001	0	0.20069	0.548903	2.653	2.65	3.83576	0.460238	0.742035	0.547747	0.661329	0.378794	7.48312	0.460238	0.459283	0.177914	-2.04417	0.172524	0.116798	0.137766	40.3954	27.3474	32.2572	2.33461
	(e)	63.94	27.85		Mount Jourdanne	19III-TVG3-1	whole rock-XRF	19III-TVG3-1	51.8483	1.63254	15.3983	0	1.0035	8.12836	0.181394	6.46971	10.4906	4.3736	0.27209	0	0.201548	0.555934	2.656	2.653	3.7802	0.463997	0.743588	0.549761	0.661798	0.387465	7.6391	0.463997	0.463033	0.166667	-2.06849	0.171455	0.115272	0.142144	39.9783	26.878	33.1437	2.32967
	(f)	63.94	27.85	2985	Mount Jourdanne	DY0115-017-005A	whole rock-XRF	DY0115-017-005A	51.8619	1.65269	15.2595	0	1.02587	8.30955	0.172366	6.44852	10.8793	3.92386	0.314315	0	0.152088	0.424247	2.662	2.658	3.40058	0.531368	0.768575	0.583044	0.669155	0.294041	7.77027	0.531368	0.530265	0.190184	-1.6861	0.170346	0.117654	0.152002	38.7148	26.7395	34.5457	1.75455
	(f)	63.935	27.85		Mount Jourdanne	DY0125-26I-TVG2-001	whole rock-XRF	DY0125-26I-TVG2-001	51.8107	1.58922	15.5804	0	0.959369	7.77089	0.170992	6.4776	10.6921	4.4961	0.261518	0	0.191109	0.652195	2.652	2.649	3.88462	0.465802	0.744328	0.550722	0.66202	0.455499	7.35661	0.465802	0.464835	0.164557	-1.86466	0.172699	0.118718	0.132383	40.7502	28.0127	31.2371	2.22366
	(f)	63.923	27.85	2759	Mount Jourdanne	DY0115-20VII-TVG19-001	whole rock-XRF	DY0115-20VII-TVG19-001	51.4157	1.17861	17.649	0	0.782556	6.33871	0.130957	7.28322	10.9601	3.88842	0.231693	0	0.141031	0.709216	2.639	2.636	3.62525	0.630204	0.797521	0.623838	0.677288	0.604553	6.58046	0.630204	0.628895	0.196581	-1.35494	0.187848	0.0924551	0.140222	44.6699	21.9856	33.3444	6.47109
	(f)	63.935	27.85	2936	Mount Jourdanne	DY0125-26I-TVG3-001	whole rock-XRF	DY0125-26I-TVG3-001	51.803	1.61192	15.4744	0	0.993136	8.0444	0.171266	6.47789	10.5178	4.4227	0.282085	0	0.20149	0.539264	2.654	2.652	3.82367	0.462712	0.74306	0.549075	0.661639	0.376656	7.57692	0.462712	0.461752	0.175	-2.03888	0.171943	0.11612	0.138213	40.3361	27.2406	32.4234	2.35125
	(f)	63.935	27.85	2936	Mount Jourdanne	DY0125-26I-TVG3-001-002	whole rock-XRF	DY0125-26I-TVG3-001-002	51.8383	1.63562	15.5033	0	0.983176	7.96373	0.170587	6.43212	10.5262	4.45532	0.291001	0	0.20069	0.548903	2.653	2.65	3.83576	0.460238	0.742035	0.547747	0.661329	0.378794	7.48312	0.460238	0.459283	0.177914	-2.04417	0.172524	0.116798	0.137766	40.3954	27.3474	32.2572	2.33461
	(f)	63.94	27.85		Mount Jourdanne	DY0115-19III-TVG3-001	whole rock-XRF	DY0115-19III-TVG3-001	51.8483	1.63254	15.3983	0	1.0035	8.12836	0.181394	6.46971	10.4906	4.3736	0.27209	0	0.201548	0.555934	2.656	2.653	3.7802	0.463997	0.743588	0.549761	0.661798	0.387465	7.6391	0.463997	0.463033	0.166667	-2.06849	0.171455	0.115272	0.142144	39.9783	26.878	33.1437	2.32967
	(f)	63.91	27.85	2800	Mount Jourdanne	DUF0107-016-001-001	whole rock-EMPA data	DUF0107-016-001-001	50.8394	1.1475	16.9731	0	0.873655	7.0766	0.11974	7.77309	11.3254	3.62212	0.11974	0	0.129718	0.863085	2.661	2.658	3.54134	0.679932	0.809508	0.641486	0.68054	0.821804	7.65537	0.679932	0.67852	0.104348	-0.842712	0.18083	0.0977356	0.128925	44.3764	23.9847	31.6389	5.58627
	(f)	63.91	27.85	2800	Mount Jourdanne	DUF0107-016-002-001	whole rock-EMPA data	DUF0107-016-002-001	51.1632	1.28706	16.9712	0	0.881321	7.1387	0.149658	7.35321	10.8752	3.85121	0.189567	0	0.139681	0.831668	2.654	2.652	3.61464	0.610115	0.792239	0.616206	0.675834	0.720554	7.38446	0.610115	0.608848	0.147287	-1.41887	0.182558	0.0956458	0.13757	43.9081	23.0043	33.0877	5.75551
	(f)	63.91	27.85	2800	Mount Jourdanne	DUF0107-016-002-003	whole rock-EMPA data	DUF0107-016-002-003	51.1411	1.24516	16.974	0	0.886551	7.18107	0.109574	7.4809	10.8976	3.75539	0.189264	0	0.139458	0.871627	2.656	2.653	3.5687	0.627344	0.796785	0.62277	0.677086	0.777603	7.52176	0.627344	0.626041	0.152	-1.35812	0.182061	0.0944637	0.139607	43.7508	22.7005	33.5488	5.80236
	(f)	63.91	27.85	2800	Mount Jourdanne	DUF0107-016-003-001	whole rock-EMPA data	DUF0107-016-003-001	51.1672	1.31556	17.0724	0	0.873716	7.0771	0.0797308	7.43489	10.8334	3.79718	0.189361	0	0.159462	0.704573	2.653	2.651	3.59218	0.620043	0.794883	0.620016	0.676564	0.622013	7.38506	0.620043	0.618756	0.143939	-1.43611	0.183907	0.0930314	0.140836	44.0206	22.2684	33.711	6.08469
	(f)	63.75	27.85	4475	Mount Jourdanne	DUF0107-019-001-002	whole rock-EMPA data	DUF0107-019-001-002	51.1017	1.29333	17.0139	0	0.824347	6.67721	0.150388	7.74998	10.7778	3.98026	0.250646	0	0.180465	0.813421	2.647	2.644	3.87999	0.58722	0.785873	0.607122	0.674064	0.770605	7.21784	0.58722	0.586001	0.193798	-1.39722	0.183055	0.0975187	0.129393	44.6512	23.787	31.5618	5.7838
	(f)	63.75	27.85	4475	Mount Jourdanne	DUF0107-019-001-005	whole rock-EMPA data	DUF0107-019-001-005	51.2622	1.28356	17.0072	0	0.827852	6.7056	0.14039	7.66126	10.6495	4.02116	0.260723	0	0.180501	0.816503	2.645	2.643	3.88508	0.57231	0.781513	0.60097	0.672841	0.758531	7.18112	0.57231	0.571121	0.203125	-1.55208	0.182867	0.0962782	0.134178	44.2431	23.2937	32.4632	5.79255
	(f)	63.75	27.85	4475	Mount Jourdanne	DUF0107-019-001-007	whole rock-EMPA data	DUF0107-019-001-007	51.3132	1.2738	17.081	0	0.816883	6.61675	0.150449	7.69297	10.6217	4.02201	0.250749	0	0.160479	0.80112	2.643	2.641	3.89814	0.5726	0.7816	0.601092	0.672865	0.749485	7.11286	0.5726	0.571412	0.19685	-1.5704	0.183469	0.0947541	0.135908	44.3021	22.8802	32.8177	5.97593
	(f)	63.36	27.85	4950	Mount Jourdanne	DUF0107-022-001-001	whole rock-EMPA data	DUF0107-022-001-001	48.5885	0.94841	18.1895	0	1.07486	8.7064	0.139766	8.42587	10.2828	3.38433	0.119799	0	0.139766	0.354412	2.689	2.686	3.53561	0.740867	0.822393	0.660977	0.683964	0.354412	10.3496	0.740867	0.739329	0.126316	-1.68948	0.190268	0.0633791	0.104051	53.1924	17.7186	29.089	11.122
	(f)	63.36	27.85	4950	Mount Jourdanne	DUF0107-022-001-003	whole rock-EMPA data	DUF0107-022-001-003	48.5712	0.998379	18.2204	0	1.12151	9.08425	0.189692	7.68752	10.473	3.45439	0.0998379	0	0.0998379	0.0335382	2.68	2.677	3.35106	0.74079	0.822378	0.660954	0.68396	0.0313388	9.65188	0.74079	0.739252	0.1	-1.72074	0.191197	0.0669629	0.101651	53.1382	18.6106	28.2512	10.844
	(f)	63.36	27.85	4950	Mount Jourdanne	DUF0107-022-002-001	whole rock-EMPA data	DUF0107-022-002-001	48.9413	0.948861	17.7487	0	1.09868	8.89932	0.189772	8.30004	10.4275	3.2461	0.109868	0	0.0898921	0.258703	2.689	2.686	3.34509	0.758795	0.825859	0.666314	0.684872	0.258703	10.3654	0.758795	0.75722	0.115789	-1.5825	0.185951	0.0677368	0.114936	50.4446	18.3756	31.1798	9.97562
	(f)	63.36	27.85	4950	Mount Jourdanne	DUF0107-022-002-002	whole rock-EMPA data	DUF0107-022-002-002	51.6312	1.82133	16.5329	0	0.985017	7.97864	0.140876	6.84257	8.70415	4.80992	0.322003	0	0.23144	0.666465	2.642	2.639	4.28361	0.377433	0.702288	0.498305	0.648892	0.510923	7.77317	0.377433	0.376649	0.176796	-3.74308	0.184946	0.0809185	0.154859	43.959	19.2332	36.8078	7.17837
	(f)	63.938	27.845	3030	Mount Jourdanne	SHK0446-001	LA-ICPMS	SHK0446-001	50.2932	1.78909	15.903	0	1.09333	8.85598	0.188848	6.12265	10.5357	4.71126	0.278302	0	0.228606	0.113627	2.666	2.663	3.94271	0.460588	0.74218	0.547936	0.661373	0.0721082	7.97443	0.460588	0.459632	0.155556	-2.12747	0.178364	0.116773	0.0946621	45.758	29.9571	24.2848	3.84165
	(a)	51.56	37.43	1900-2700	Mount Jourdanne	PUB-1-MI1	MI in Pl-EMPA	PUB-1-MI1	53.0479	1.26444	16.8303	0	0.833841	6.75411	0.124329	6.70171	9.94787	4.03341	0.298491	0	0.163591	0.853496	2.628	2.625	3.56682	0.509679	0.76108	0.57288	0.666982	0.631573	6.64569	0.509679	0.508621	0.236067	-2.54162	0.180893	0.0869017	0.19338	39.2244	18.8436	41.9321	5.27669
	(a)	51.56	37.43	1900-2700	Mount Jourdanne	PUB-1-MI2	MI in Pl-EMPA	PUB-1-MI2	53.102	1.28452	16.7375	0	0.840674	6.80946	0.162706	6.612	10.0616	3.9538	0.281083	0	0.154646	0.853427	2.63	2.627	3.4724	0.522453	0.765552	0.578925	0.668282	0.617217	6.6473	0.522453	0.521368	0.218824	-2.45484	0.180234	0.0879998	0.196516	38.7809	18.9348	42.2843	5.04053
	(a)	51.56	37.43	1900-2700	Mount Jourdanne	PUB-1-MI3	MI in Pl-EMPA	PUB-1-MI3	52.9119	1.14931	16.8632	0	0.84722	6.86248	0.143412	6.74841	10.0031	4.01654	0.290346	0	0.164043	0.838577	2.63	2.628	3.56674	0.516994	0.763661	0.576363	0.667734	0.627901	6.76093	0.516994	0.515921	0.252627	-2.47238	0.179775	0.0870319	0.189002	39.4409	19.094	41.4652	5.27637
	(a)	51.56	37.43	1900-2700	Mount Jourdanne	PUB-1-MI4	MI in Pl-EMPA	PUB-1-MI4	53.1969	1.2992	16.7661	0	0.82614	6.69173	0.114458	6.7706	9.97944	3.91166	0.280121	0	0.163655	0.837039	2.628	2.625	3.48345	0.52373	0.765989	0.57952	0.668409	0.630257	6.62753	0.52373	0.522642	0.215611	-2.48938	0.180698	0.0855447	0.201506	38.6315	18.2886	43.0799	5.22649
	(a)	51.56	37.43	1900-2700	Mount Jourdanne	PUB-2-MI1	MI in Pl-EMPA	PUB-2-MI1	52.4442	1.33191	17.229	0	0.775887	6.28469	0.162319	6.80968	10.792	3.77037	0.211951	0	0.187949	0.708182	2.632	2.629	3.37323	0.612489	0.792877	0.617124	0.67601	0.538476	6.29877	0.612489	0.611217	0.159133	-1.6651	0.185648	0.0910429	0.176308	40.982	20.0978	38.9202	5.57613
	(a)	51.56	37.43	1900-2700	Mount Jourdanne	PUB-2-MI2	MI in Pl-EMPA	PUB-2-MI2	52.9669	1.10487	17.3451	0	0.75109	6.08383	0.17953	6.7782	10.6162	3.80487	0.23297	0	0.13641	0.658175	2.621	2.619	3.39387	0.595137	0.788118	0.610311	0.67469	0.496526	6.11396	0.595137	0.593901	0.210857	-1.85037	0.183945	0.0879953	0.188625	39.9389	19.1059	40.9552	5.4948
	(e)	63.936	27.849	2958	Mount Jourdanne	C1-1	MI in Pl-EMPA	C1-1	53.0316	1.25717	16.9679	0	0.825033	6.68277	0.123003	6.63563	9.97684	4.04193	0.295791	0	0.16236	0.84325	2.627	2.625	3.55393	0.514414	0.762757	0.575141	0.667471	0.613566	6.55399	0.514414	0.513346	0.235284	-2.53247	0.182151	0.0861204	0.192713	39.5135	18.6818	41.8047	5.4691
	(e)	63.936	27.849	2958	Mount Jourdanne	C1-2	MI in Pl-EMPA	C1-2	52.4769	1.35217	16.9398	0	0.836379	6.77467	0.0857805	6.72241	10.0119	4.30032	0.317023	0	0.182613	0.847276	2.631	2.628	3.80133	0.48952	0.753664	0.562977	0.664804	0.630266	6.67338	0.48952	0.488504	0.234455	-2.47139	0.183065	0.0918656	0.167974	41.3328	20.7416	37.9255	5.48367
	(e)	63.936	27.849	2958	Mount Jourdanne	C1-2	MI in Pl-EMPA	C1-2	53.067	1.27717	16.8875	0	0.832045	6.73956	0.160986	6.54654	10.0989	3.96012	0.277102	0	0.153028	0.849395	2.629	2.626	3.45867	0.528596	0.767643	0.581772	0.668887	0.603999	6.55856	0.528596	0.527498	0.216965	-2.43712	0.181614	0.0871701	0.195384	39.1267	18.7799	42.0934	5.2576
	(e)	63.936	27.849	2958	Mount Jourdanne	C1-3	MI in Pl-EMPA	C1-3	52.8554	1.0472	17.298	0	0.785941	6.36612	0.133887	6.98559	10.3213	3.71032	0.325588	0	0.170685	0.744488	2.627	2.624	3.37203	0.592987	0.787513	0.60945	0.674522	0.591165	6.45159	0.592987	0.591756	0.310914	-2.08301	0.182761	0.0846239	0.19208	39.7769	18.4179	41.8052	5.68792
	(e)	63.936	27.849	2958	Mount Jourdanne	C1-3	MI in Pl-EMPA	C1-3	52.9474	1.08332	17.4208	0	0.753507	6.1034	0.133939	7.08653	10.236	3.72962	0.343573	0	0.161822	0.619115	2.621	2.618	3.41926	0.588174	0.786146	0.607509	0.67414	0.50375	6.26432	0.588174	0.586953	0.317148	-2.138	0.184418	0.082783	0.194562	39.9377	17.9276	42.1347	5.94597
	(e)	63.936	27.849	2958	Mount Jourdanne	C1-4	MI in Pl-EMPA	C1-4	52.9197	1.1346	17.1245	0	0.829812	6.72148	0.140372	6.60841	10.0499	4.02803	0.284125	0	0.159088	0.834948	2.627	2.625	3.53398	0.525877	0.766722	0.580517	0.668621	0.603296	6.57301	0.525877	0.524785	0.250419	-2.4676	0.182153	0.0852907	0.18909	39.8992	18.6822	41.4186	5.64054
	(e)	63.936	27.849	2958	Mount Jourdanne	C1-4	MI in Pl-EMPA	C1-4	53.1987	1.28136	17.0288	0	0.809218	6.55467	0.112038	6.63045	10.0266	3.92534	0.274131	0	0.15872	0.818692	2.625	2.622	3.45374	0.53257	0.768976	0.583594	0.669271	0.594908	6.4455	0.53257	0.531464	0.213938	-2.48426	0.183052	0.0838389	0.201329	39.0953	17.9059	42.9988	5.5826
	(e)	63.936	27.849	2958	Mount Jourdanne	C1-6	MI in Pl-EMPA	C1-6	53.0193	1.17032	16.8717	0	0.794763	6.43758	0.131669	7.01737	10.0082	4.0842	0.314044	0	0.150904	0.758022	2.623	2.621	3.71207	0.507911	0.760447	0.572029	0.666797	0.606575	6.53096	0.507911	0.506857	0.268341	-2.38661	0.180121	0.0888861	0.186614	39.533	19.5088	40.9582	5.1557
	(e)	63.936	27.849	2958	Mount Jourdanne	C1-7	MI in Pl-EMPA	C1-7	52.9361	1.05528	16.9308	0	0.784164	6.35173	0.0673607	6.80951	10.8165	3.90317	0.231863	0	0.11345	0.759252	2.628	2.625	3.48783	0.577314	0.782996	0.603056	0.673258	0.577283	6.3561	0.577314	0.576115	0.219716	-1.64063	0.179261	0.0971816	0.178393	39.4123	21.3663	39.2214	4.36129
	(e)	63.936	27.849	2958	Mount Jourdanne	C1-7	MI in Pl-EMPA	C1-7	52.514	1.10559	17.2247	0	0.791224	6.40892	0.0771059	6.71389	10.6874	4.06348	0.262241	0	0.151471	0.764953	2.629	2.626	3.59624	0.561906	0.778365	0.596563	0.671951	0.567803	6.36156	0.561906	0.56074	0.237195	-1.79845	0.182773	0.0955512	0.165329	41.1972	21.5374	37.2655	5.11252
	(e)	63.936	27.849	2958	Mount Jourdanne	C1-7	MI in Pl-EMPA	C1-7	52.4607	1.34702	17.0218	0	0.821241	6.65205	0.131753	6.6742	10.4405	4.03027	0.260691	0	0.159759	0.83732	2.634	2.631	3.55575	0.547488	0.773848	0.590291	0.670667	0.615284	6.54686	0.547488	0.546351	0.193531	-2.05723	0.183805	0.0925536	0.171924	41.002	20.6463	38.3517	5.37273
	(e)	63.936	27.849	2958	Mount Jourdanne	C1-7	MI in Pl-EMPA	C1-7	52.2	1.38148	16.9937	0	0.81785	6.62458	0.131536	6.88325	10.6067	3.95945	0.241923	0	0.159496	0.823675	2.638	2.635	3.55923	0.56804	0.780232	0.599173	0.672479	0.637838	6.62705	0.56804	0.56686	0.17512	-1.82835	0.183961	0.0940514	0.164925	41.532	21.2336	37.2343	5.38195
	(e)	63.936	27.849	2958	Mount Jourdanne	C1-7	MI in Pl-EMPA	C1-7	52.4204	1.33284	17.0589	0	0.799876	6.47899	0.0855134	6.98782	10.4198	4.00608	0.241418	0	0.168312	0.757669	2.632	2.63	3.63336	0.551325	0.775068	0.591979	0.671015	0.601958	6.55277	0.551325	0.550181	0.18113	-1.98382	0.183991	0.0908169	0.171183	41.2545	20.363	38.3826	5.595
	(e)	63.936	27.849	2958	Mount Jourdanne	C2-2	MI in Pl-EMPA	C2-2	52.5332	1.32252	17.2037	0	0.775027	6.27772	0.160969	6.79332	10.6908	3.8427	0.212351	0	0.187655	0.758164	2.631	2.628	3.43086	0.593441	0.787641	0.609632	0.674558	0.574127	6.2856	0.593441	0.592209	0.160565	-1.77119	0.185282	0.090667	0.177373	40.8721	20.0006	39.1274	5.56476
	(e)	63.936	27.849	2958	Mount Jourdanne	C2-2	MI in Pl-EMPA	C2-2	53.0513	1.09911	17.3076	0	0.750053	6.07543	0.1727	6.76739	10.5465	3.86023	0.233376	0	0.136254	0.65202	2.62	2.618	3.43831	0.580567	0.783949	0.6044	0.673525	0.49055	6.10246	0.580567	0.579361	0.212332	-1.92327	0.183505	0.0880273	0.189632	39.7917	19.0881	41.1203	5.43596
	(e)	63.936	27.849	2958	Mount Jourdanne	C2-4	MI in Pl-EMPA	C2-4	53.4401	1.00178	17.1687	0	0.763295	6.18269	0.0862157	6.62648	10.2275	4.0593	0.303098	0	0.140843	0.710606	2.615	2.613	3.56585	0.527237	0.767184	0.581146	0.668754	0.515841	6.13604	0.527237	0.526142	0.30256	-2.28455	0.180925	0.0891332	0.194988	38.9047	19.1666	41.9287	5.0055
	(e)	63.936	27.849	2958	Mount Jourdanne	C2-7	MI in Pl-EMPA	C2-7	53.1168	1.2511	16.8162	0	0.766314	6.20715	0.129007	6.85569	10.5458	3.91061	0.25208	0	0.149259	0.689858	2.625	2.622	3.50827	0.556092	0.776565	0.594057	0.671441	0.530581	6.25234	0.556092	0.554937	0.201486	-1.89753	0.180588	0.0942414	0.188311	38.9921	20.3483	40.6596	4.57586
	(e)	63.936	27.849	2958	Mount Jourdanne	C2-7	MI in Pl-EMPA	C2-7	52.6973	1.25472	17.1975	0	0.743885	6.02547	0.101655	6.71839	10.7149	4.1437	0.234326	0	0.168173	0.612112	2.622	2.619	3.66618	0.549656	0.774539	0.591247	0.670864	0.45487	6.04091	0.549656	0.548515	0.186755	-1.76963	0.184373	0.0967125	0.16752	41.0991	21.5585	37.3424	5.05981
	(e)	63.936	27.849	2958	Mount Jourdanne	C2-8	MI in Pl-EMPA	C2-8	52.6509	1.11739	17.2143	0	0.763868	6.18733	0.0829151	6.9166	10.652	3.97823	0.270087	0	0.166468	0.684446	2.626	2.623	3.58609	0.570217	0.780887	0.600091	0.672664	0.534395	6.262	0.570217	0.569033	0.241712	-1.77304	0.182818	0.0938962	0.17164	40.7754	20.9424	38.2822	5.15518
	(e)	63.936	27.849	2958	Mount Jourdanne	C2-8	MI in Pl-EMPA	C2-8	52.9619	0.993434	17.3163	0	0.740273	5.99621	0.110089	6.92425	10.4329	4.09913	0.296475	0	0.129073	0.539167	2.616	2.614	3.69428	0.542029	0.772089	0.587865	0.670164	0.421757	6.09807	0.542029	0.540903	0.298434	-1.98979	0.182267	0.0917809	0.176673	40.439	20.3631	39.1979	5.23014
	(e)	63.936	27.849	2958	Mount Jourdanne	C2-8	MI in Pl-EMPA	C2-8	52.4422	1.25942	17.2392	0	0.759015	6.14802	0.147855	6.89154	10.9525	3.71316	0.243189	0	0.203941	0.687437	2.631	2.628	3.34717	0.631571	0.79787	0.624347	0.677384	0.533428	6.21671	0.631571	0.63026	0.193096	-1.48001	0.18484	0.093878	0.173849	40.8426	20.7435	38.4139	5.2633
	(a) Li, W. 2017. 'Petrogeochemical characteristics of basalts from Southwest Indian Ridge: Implications for magmatic processes at ultra-slow spreading ridge', Institute of Geophysics & Geomatics, Doctor thesis.																							2.645
	(b) Ou, Q., A. R. L. Nichols, B. B. Carvalho, F. Zi, K. Wang, J. Li, L. Zhang and J.-Y. Liu (2021). "The role of axial discontinuities in oceanic crustal evolution: Evidence from elemental and MoSrNdPbHf isotopic compositions of rock suites from the Southwest Indian Ridge (42°–53°E)." Marine Geology 442: 106626.																							2.695
	(c) Dong, Z.; Tao, C.; Liang, J.;Liao, S.; Li, W.; Zhang, G.; Cao, Z.Geochemistry of Basalts from Southwest Indian Ridge 64◦ E: Implications for the Mantle Heterogeneity East of the Melville Transform. Minerals 2021, 11, 175. https://doi.org/10.3390/min11020175
	(d) Paquet, M., M. Cannat, D. Brunelli, C. Hamelin and E. Humler (2016). "Effect of melt/mantle interactions on MORB chemistry at the easternmost Southwest Indian Ridge (61°–67°E)." Geochemistry, Geophysics, Geosystems 17(11): 4605-4640.																							2.602
	(e) Li, W.; Tao, C.; Zhang, W.; Liu, J.; Liang, J.; Liao, S.; Yang, W. 2019. 'Melt Inclusions in Plagioclase Macrocrysts at Mount Jourdanne, Southwest Indian Ridge (~64° E): Implications for an Enriched Mantle Source and Shallow Magmatic Processes'. Minerals, 9, 493.																							2.686
	(f) Data extracted from the EarthChem library (http://www.earthchem.org/library/search)
